# Supplementary material for: Estimating the predictive power of silent mutations on cancer classification and prognosis
Source: PubMed Central journal article supplement (PMC8361094; doi:10.1038/s41525-021-00229-1), 2021-08-12
Supplement: 41525_2021_229_MOESM1_ESM.pdf [file 41525_2021_229_MOESM1_ESM.pdf]

### Supplementary Figures

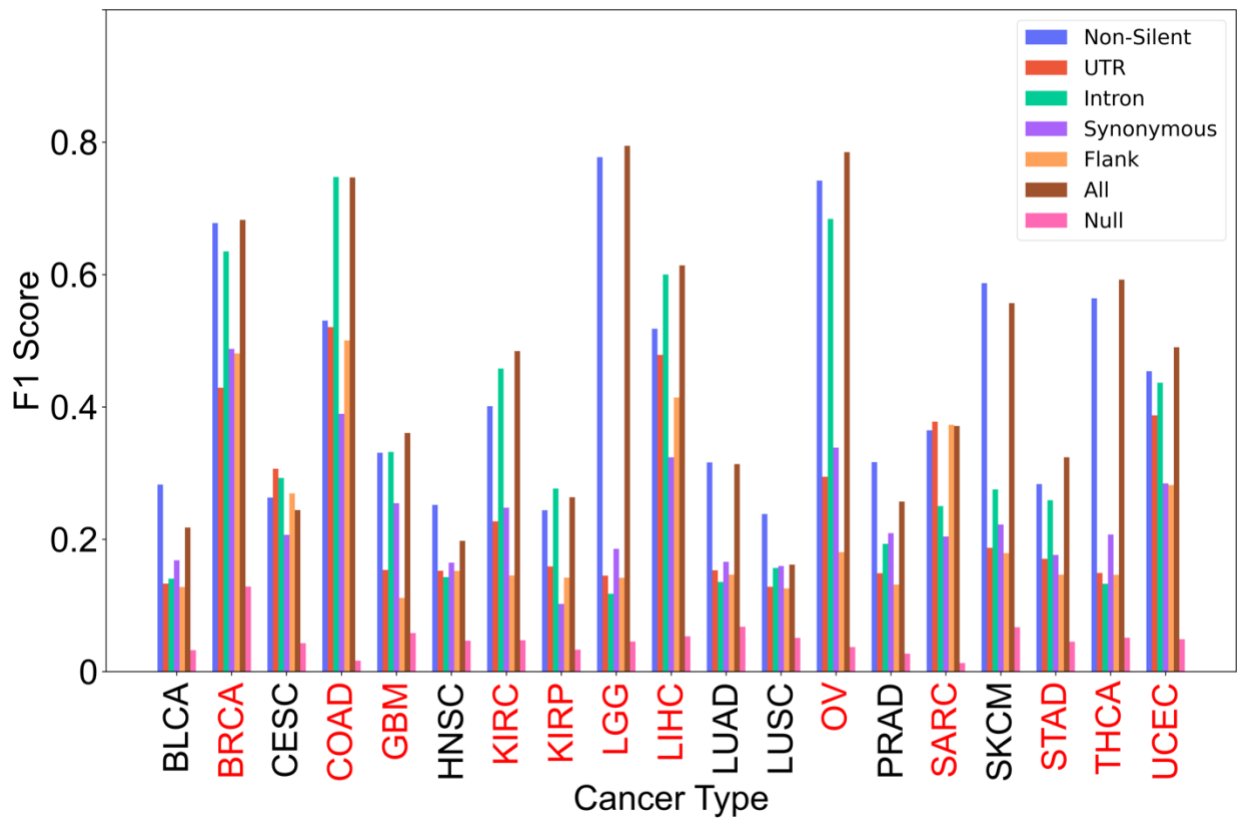

**Supplementary Figure 1: The F1 scores achieved by the OVA models using the balanced datasets.** Features from all levels of resolution were used. Each dataset contained 8,296 features. The x axis depicts the cancer types, the y-axis depicts the F1 scores achieved by the models. Each bar color denotes a different dataset. Cancer types for which the all-features classifier outperformed the non-silent classifier are denoted on red.

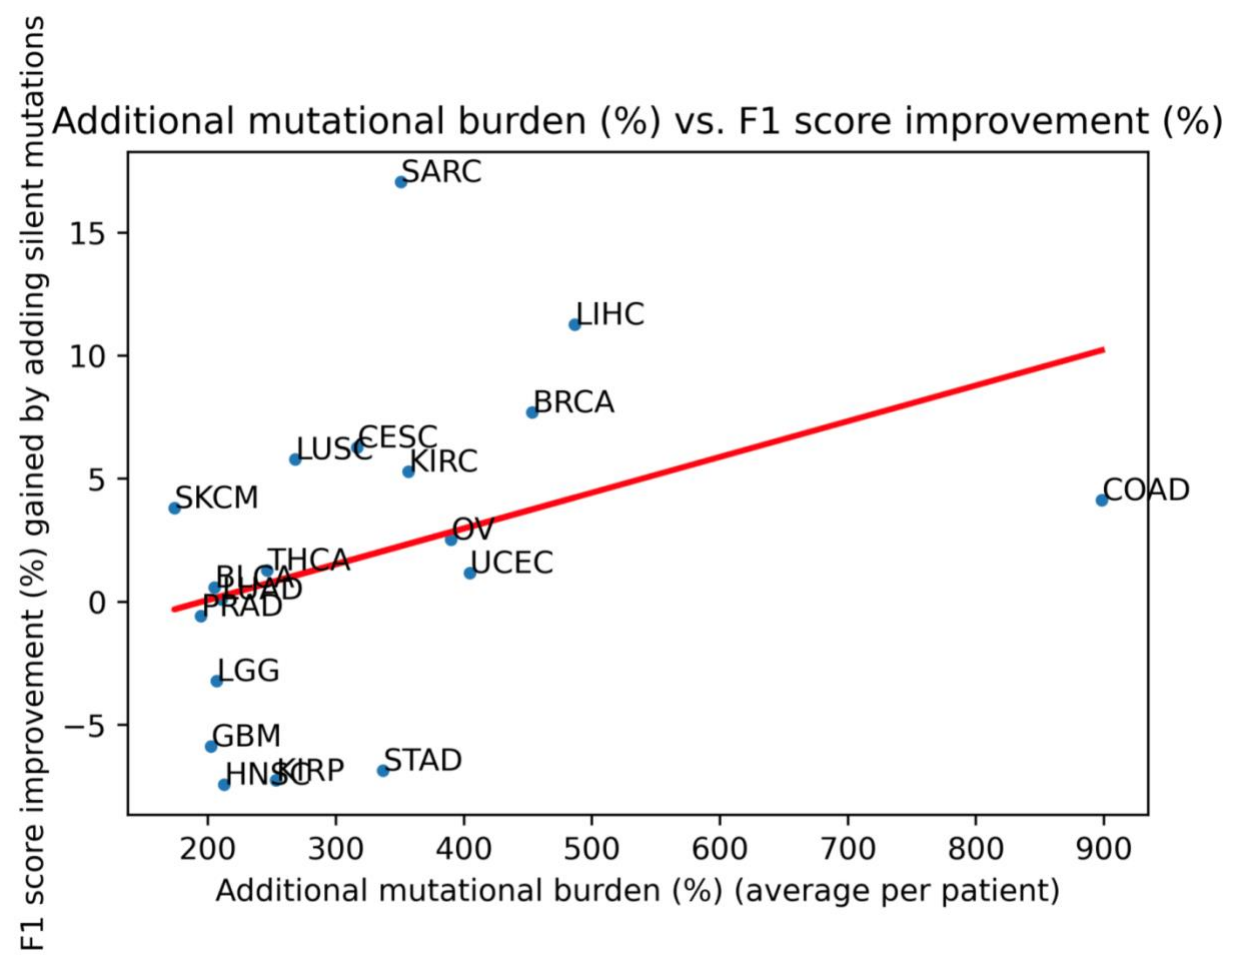

**Supplementary Figure 2: The correlation between the increase in mutational burden and the F1 score improvement obtained by adding silent features to non-silent features.** The x-axis depicts the percentage of additional mutational burden that was added on average per patient when adding silent features to non-silent features. The y-axis depicts the percent of improvement gained in F1 score by adding silent features to non-silent features. Every dot represents a single cancer type.

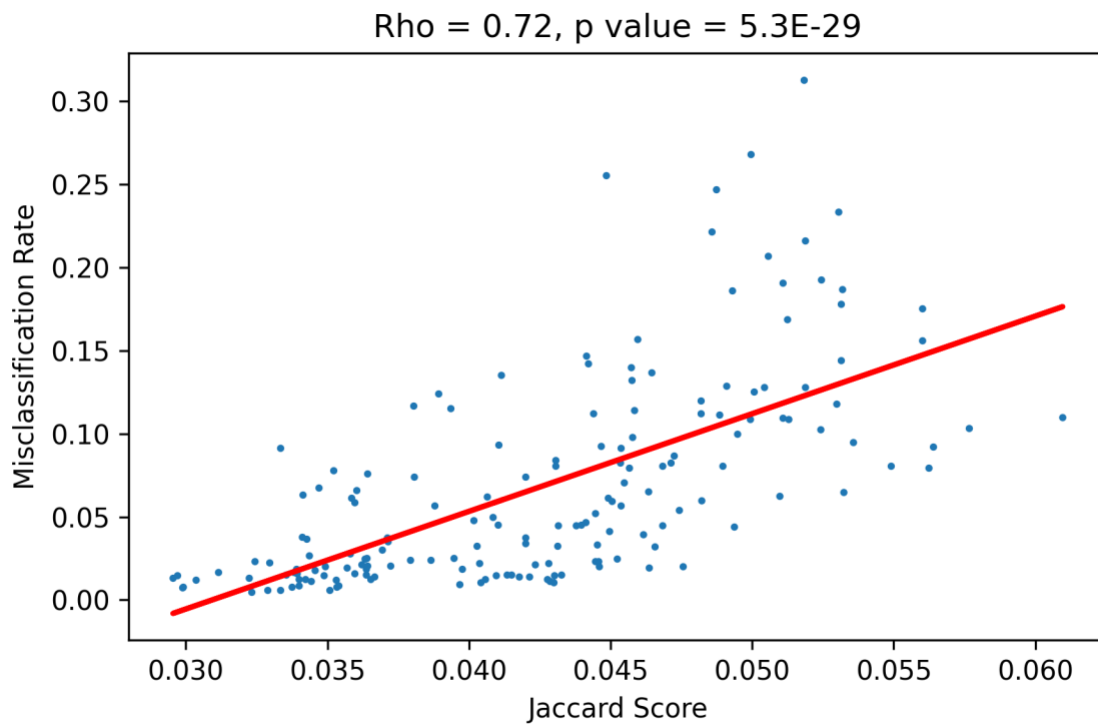

**Supplementary Figure 3: Spearman correlation between Jaccard similarity scores and misclassification rates of pairs of cancer types.** Every dot represents a pair of cancer types. The x axis denotes the pair's Jaccard similarity score and the y axis denotes their misclassification rate. The Spearman coefficient (Rho) and respective p value are noted above each graph.

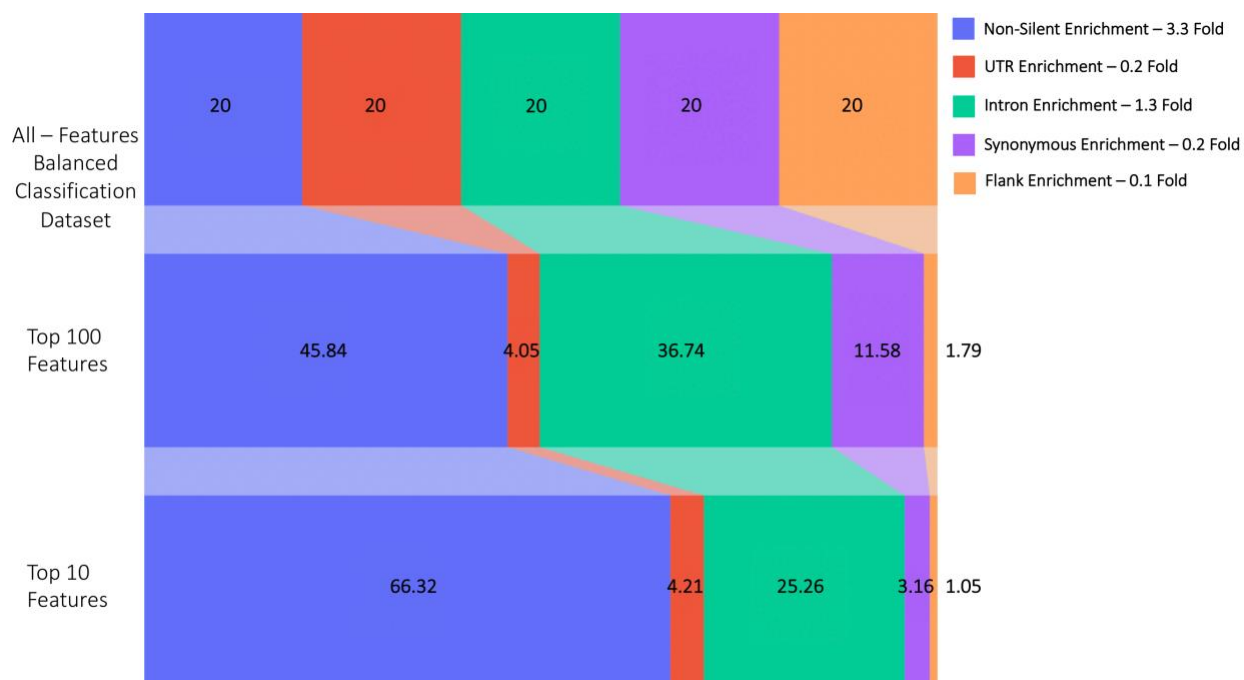

**Supplementary Figure 4: Feature-type distribution of the balanced all-features dataset and of the top ranked features for the classification task.** Feature-type distribution of the all-features dataset (top row), top ranked 100 features (middle row) and top ranked 10 features (bottom row). The feature rankings were obtained from the all-features models and were averaged across cancer types. The legend indicates the enrichment in the amount of each feature-type in the top 10 features when compared to its original amount in the balanced all-features dataset (ratio between bottom and top row).

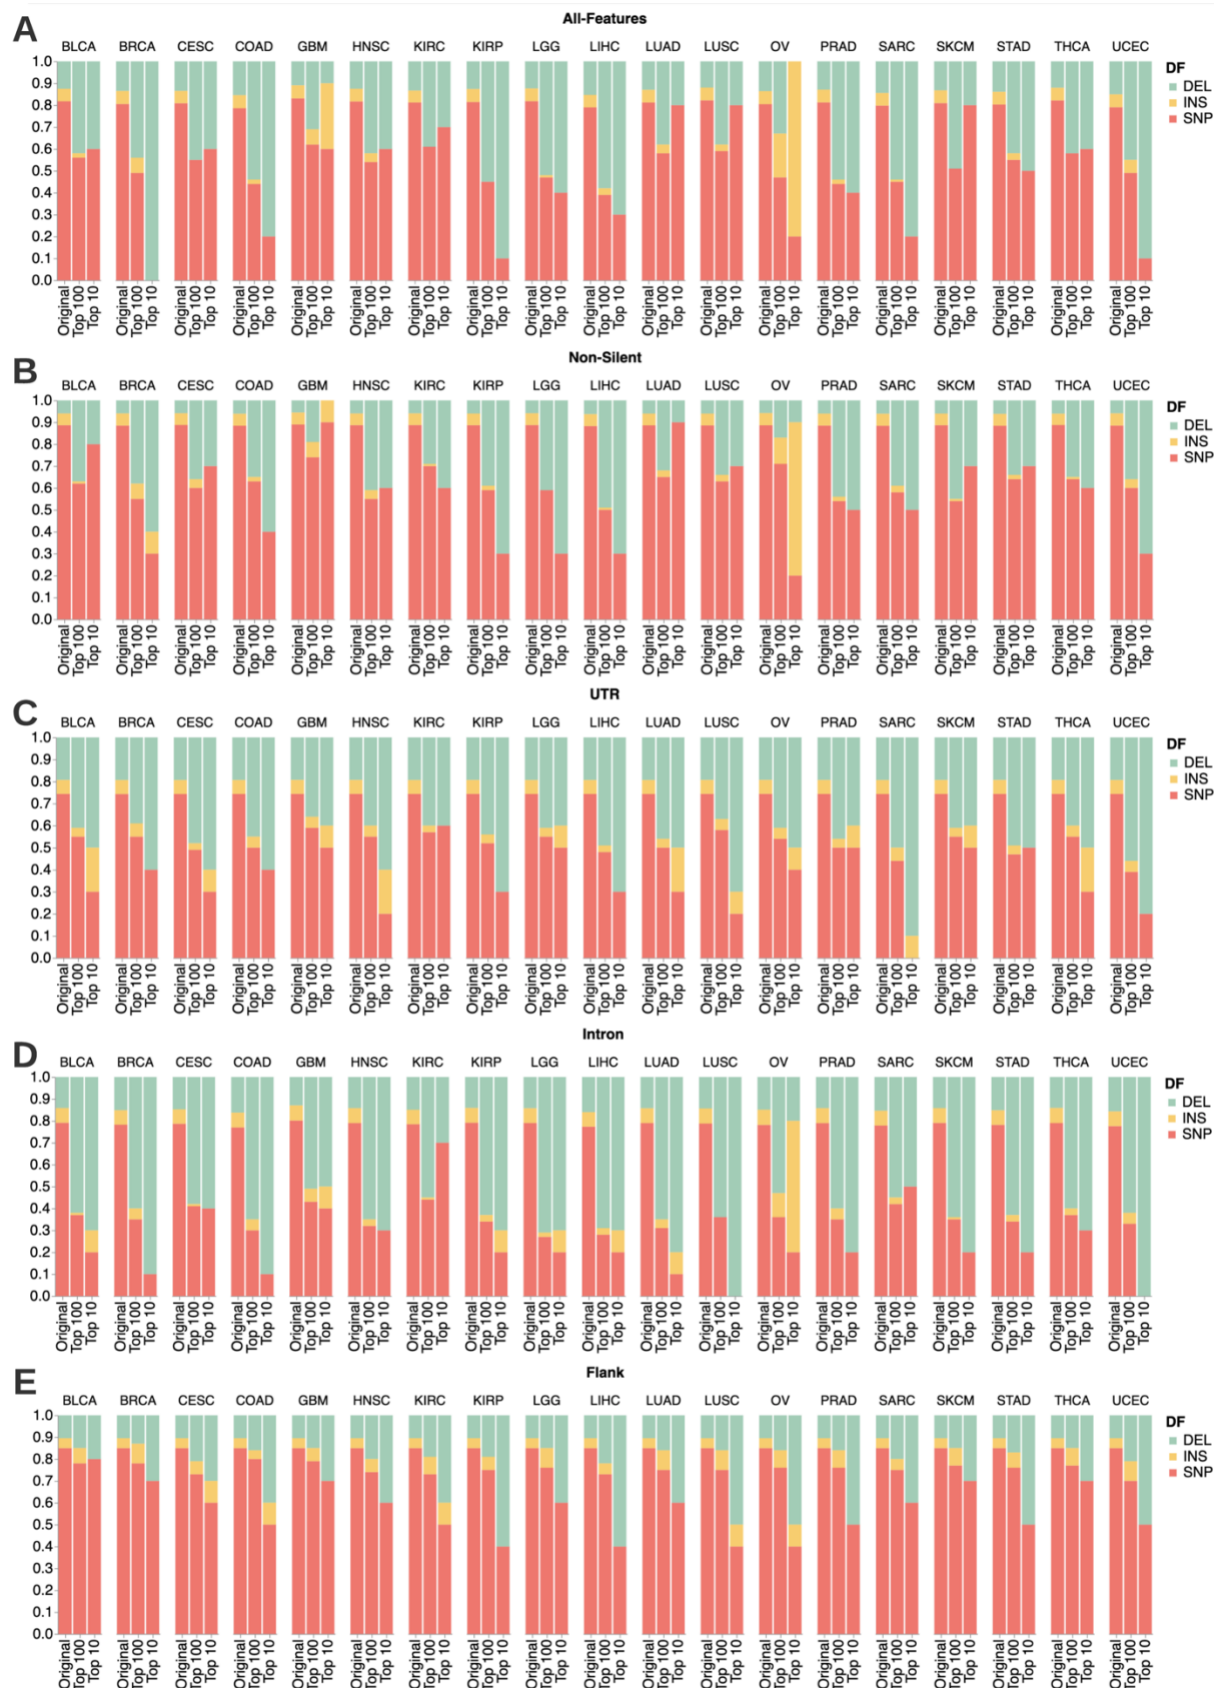

**Supplementary Figure 5: Polymorphism type distributions in the initial datasets, top 100 features and top 10 features obtained from the OVA models.** Each sub-figure (a-b) denotes a model. Within a sub-figure, every three clustered columns represent the distribution of the initial dataset (left column), top 100 features (middle column) and top 10 features (right column) of a single cancer type. The analysis was conducted using the feature importance rankings that were obtained from the balanced datasets. The Synonymous models contain only SNPs and thus are excluded from this analysis.

**a.**

BLCA

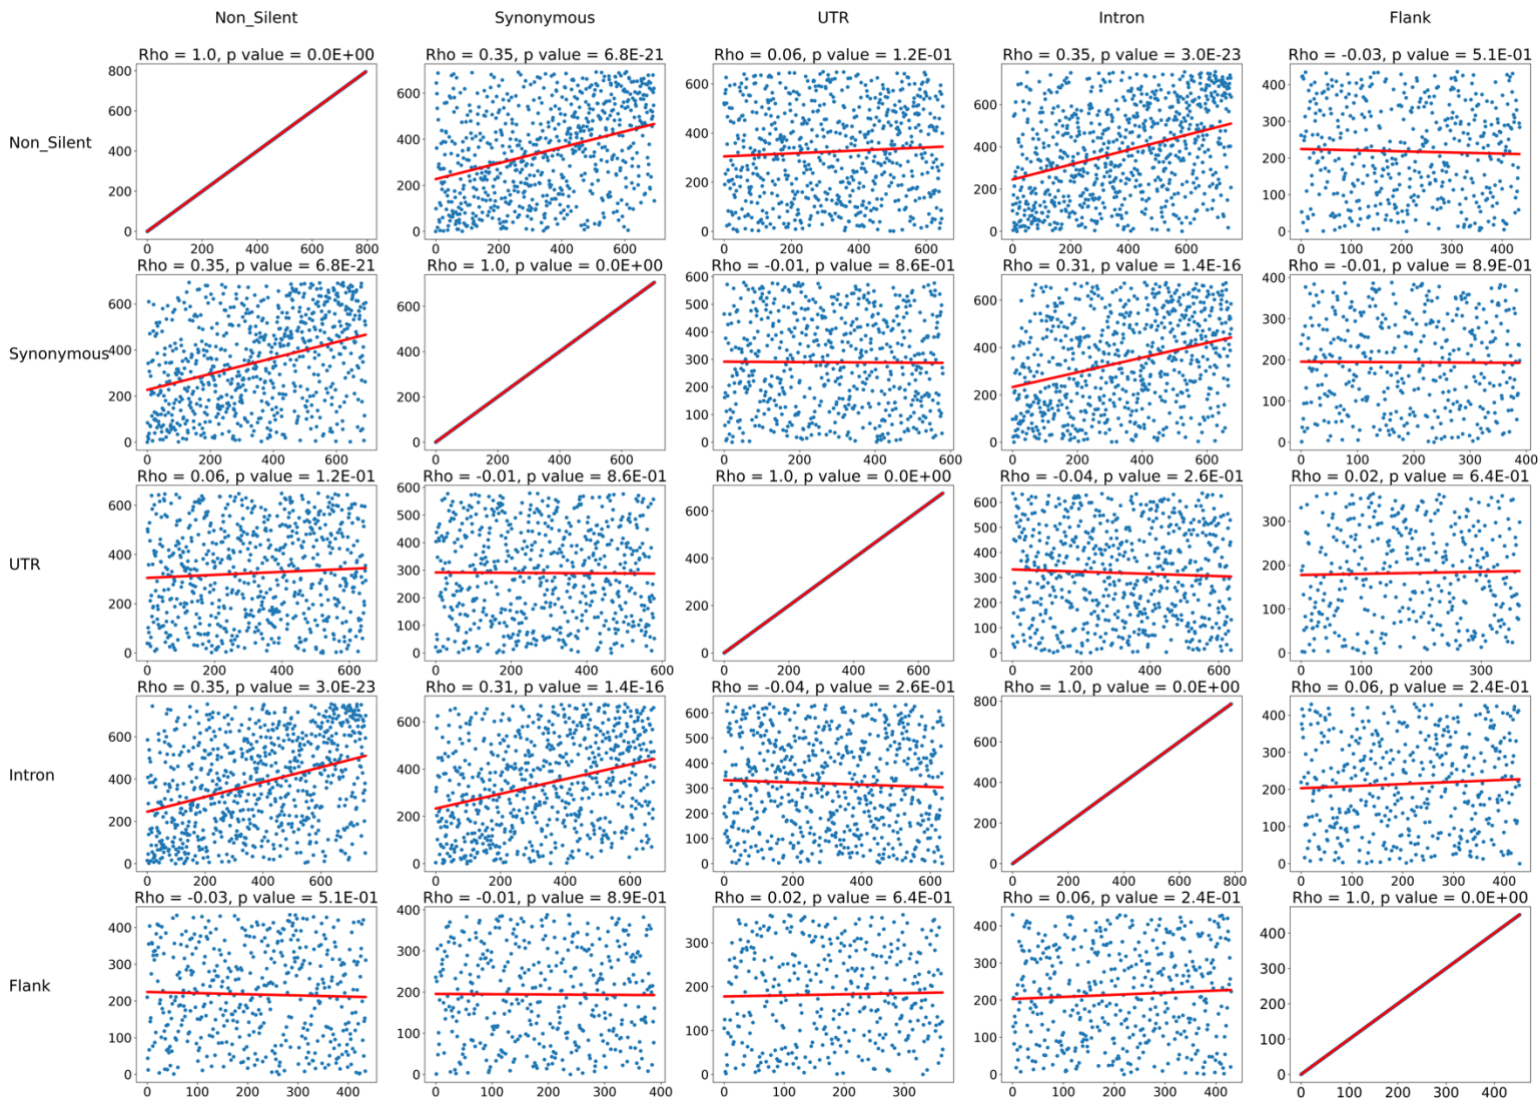

b.

## BRCA

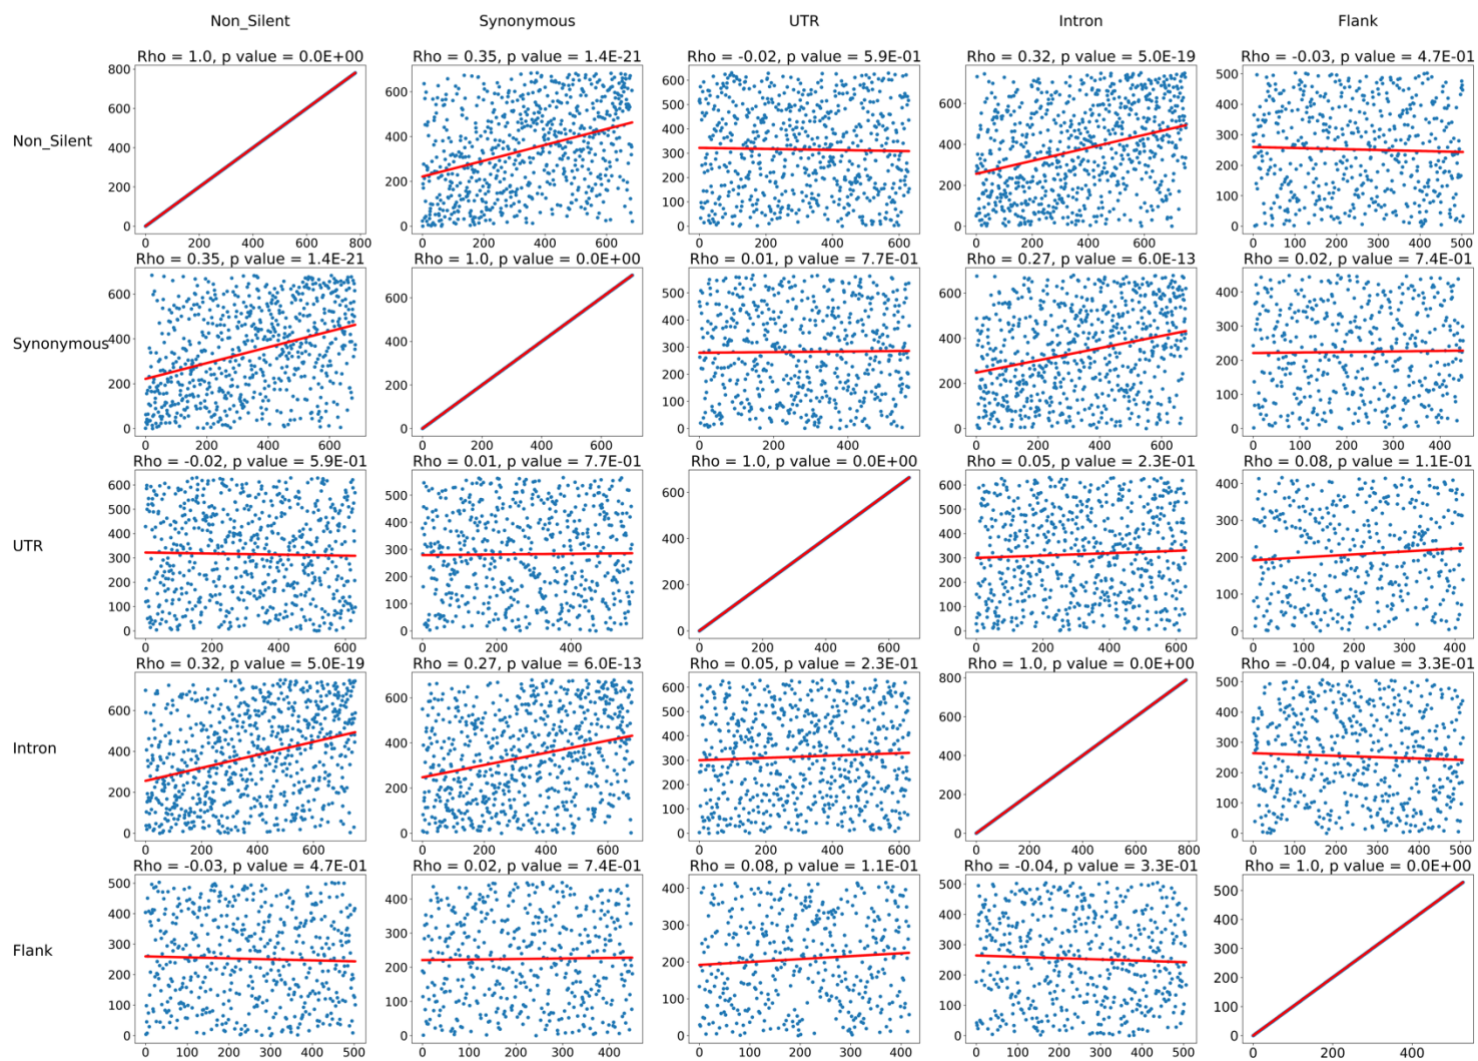

c.

CESC

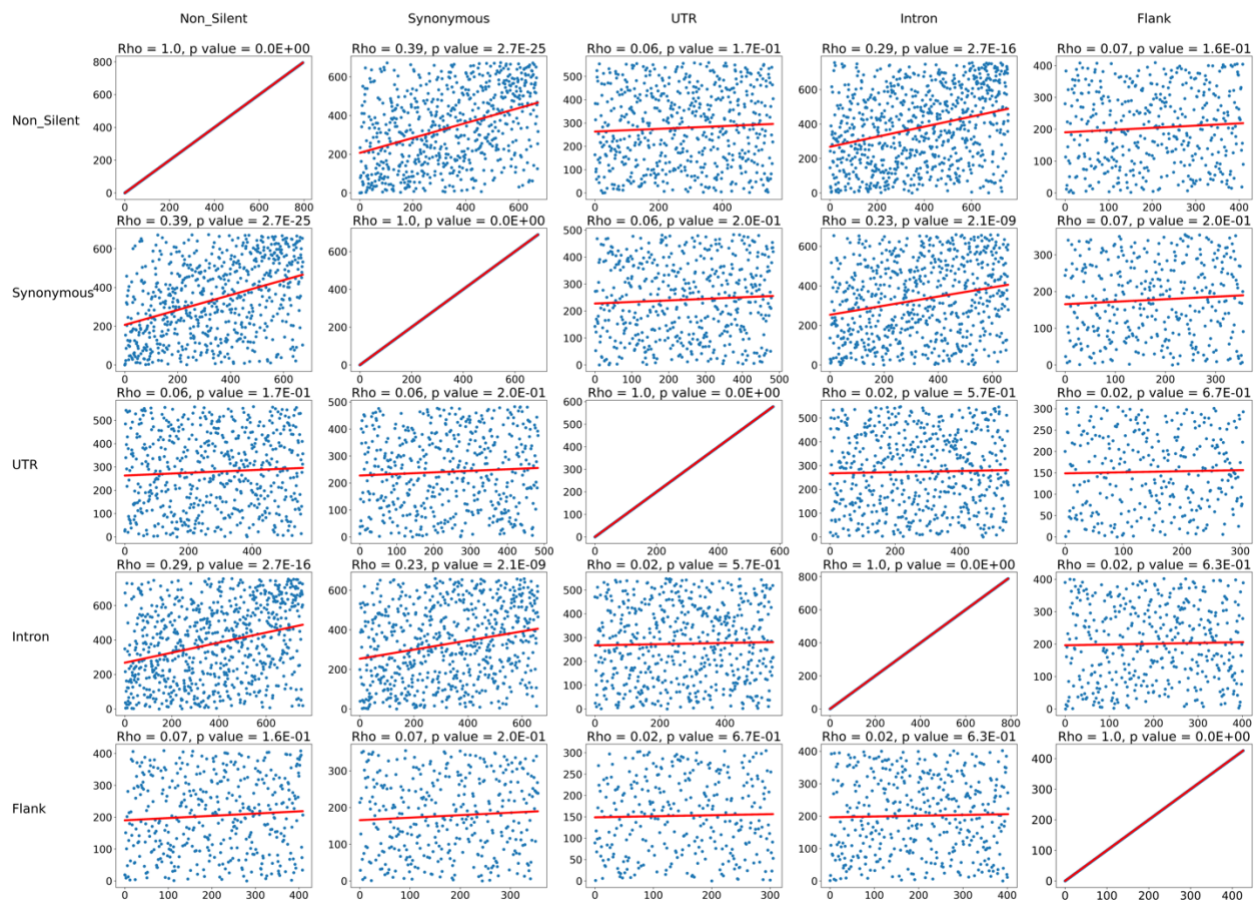



d.

COAD

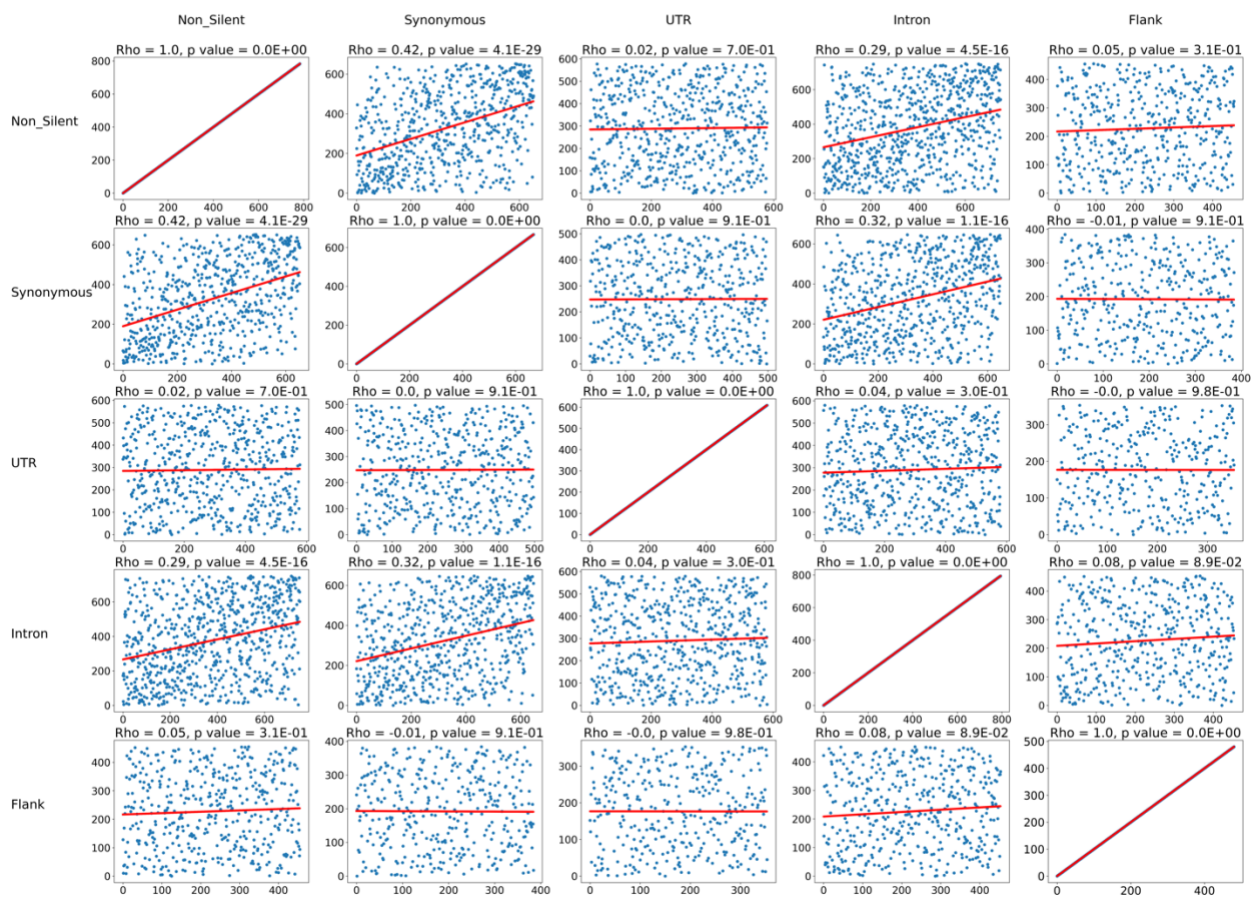

e.

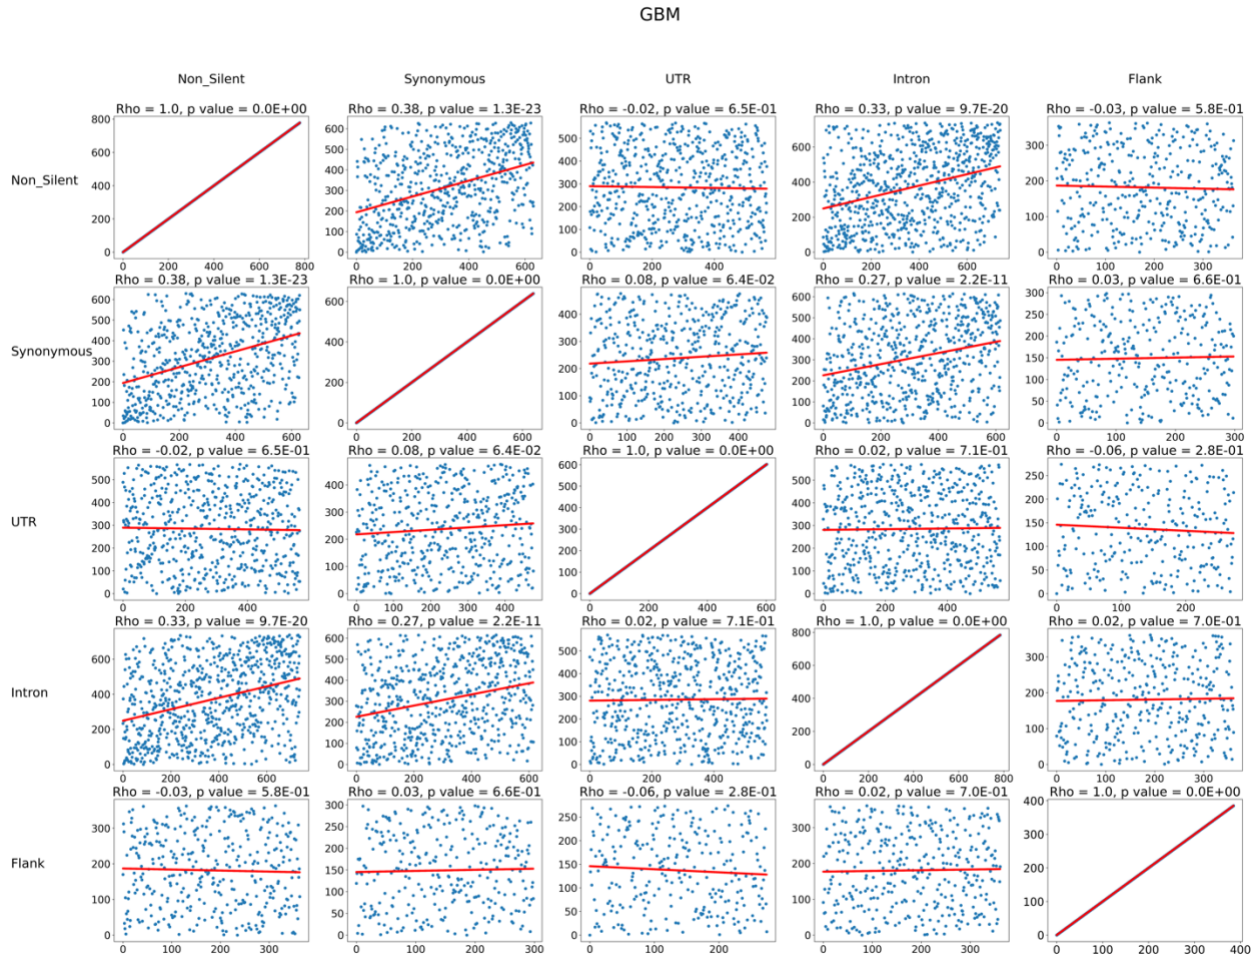

f.

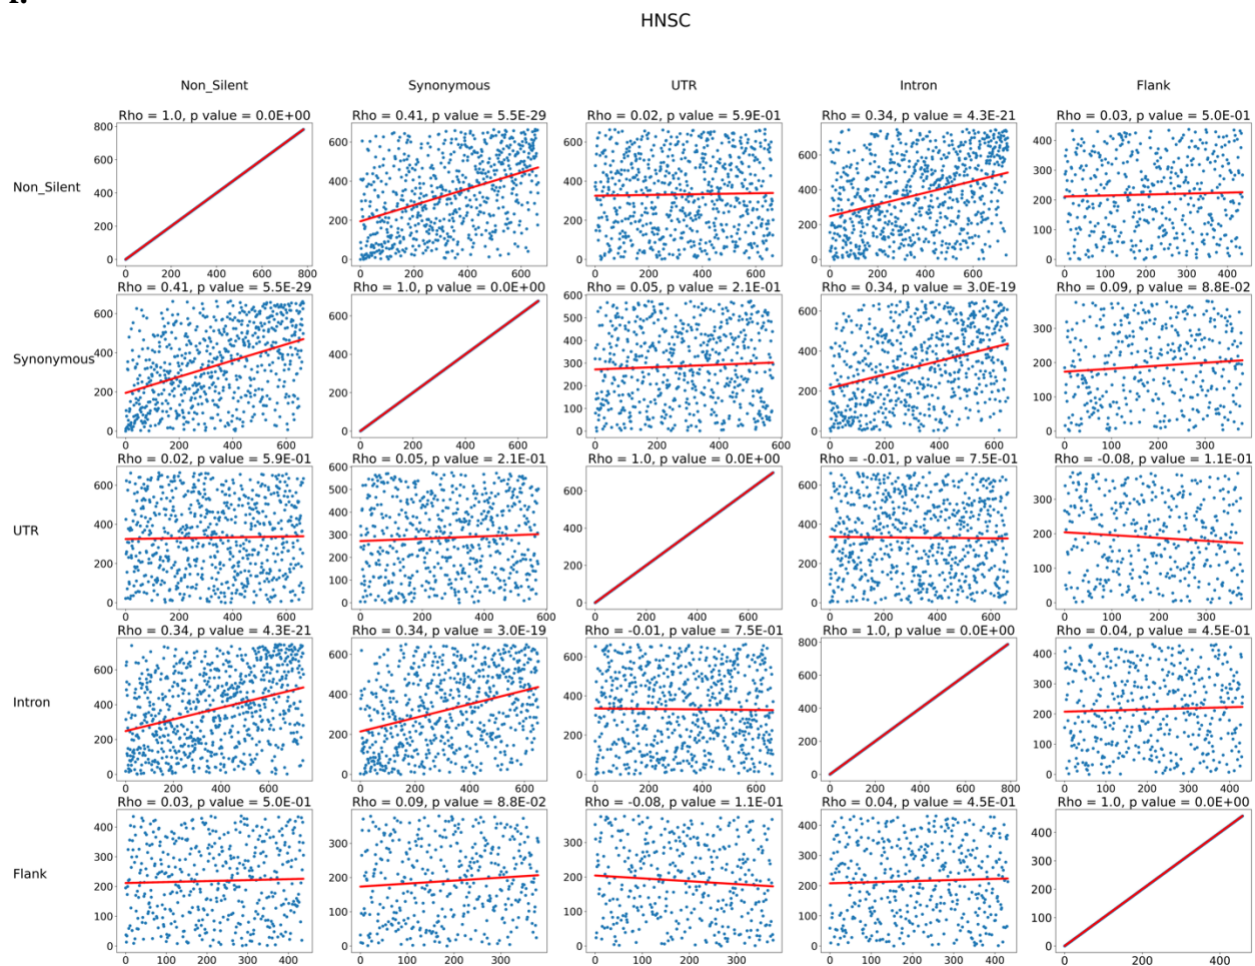

g.

KIRC

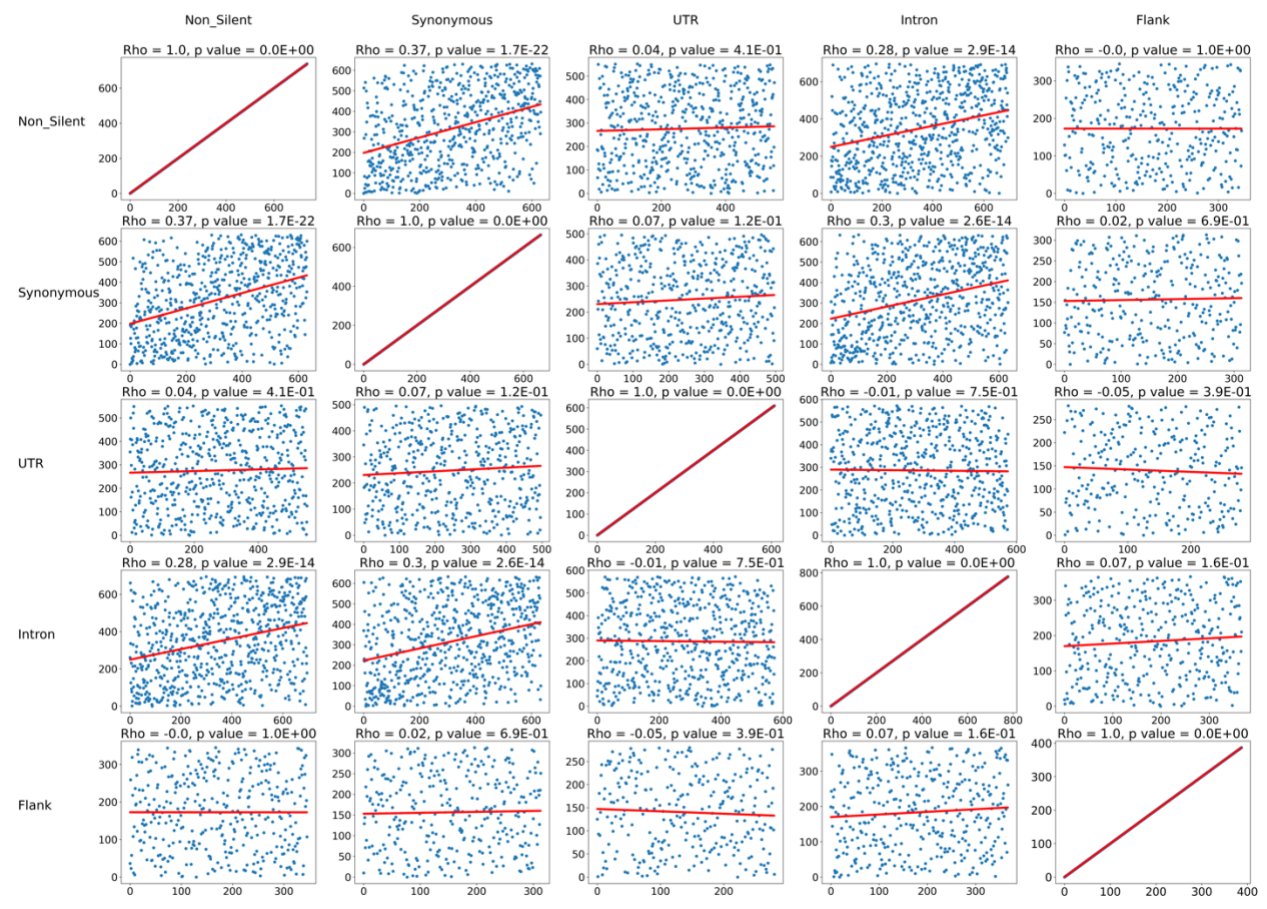

h.

## KIRP

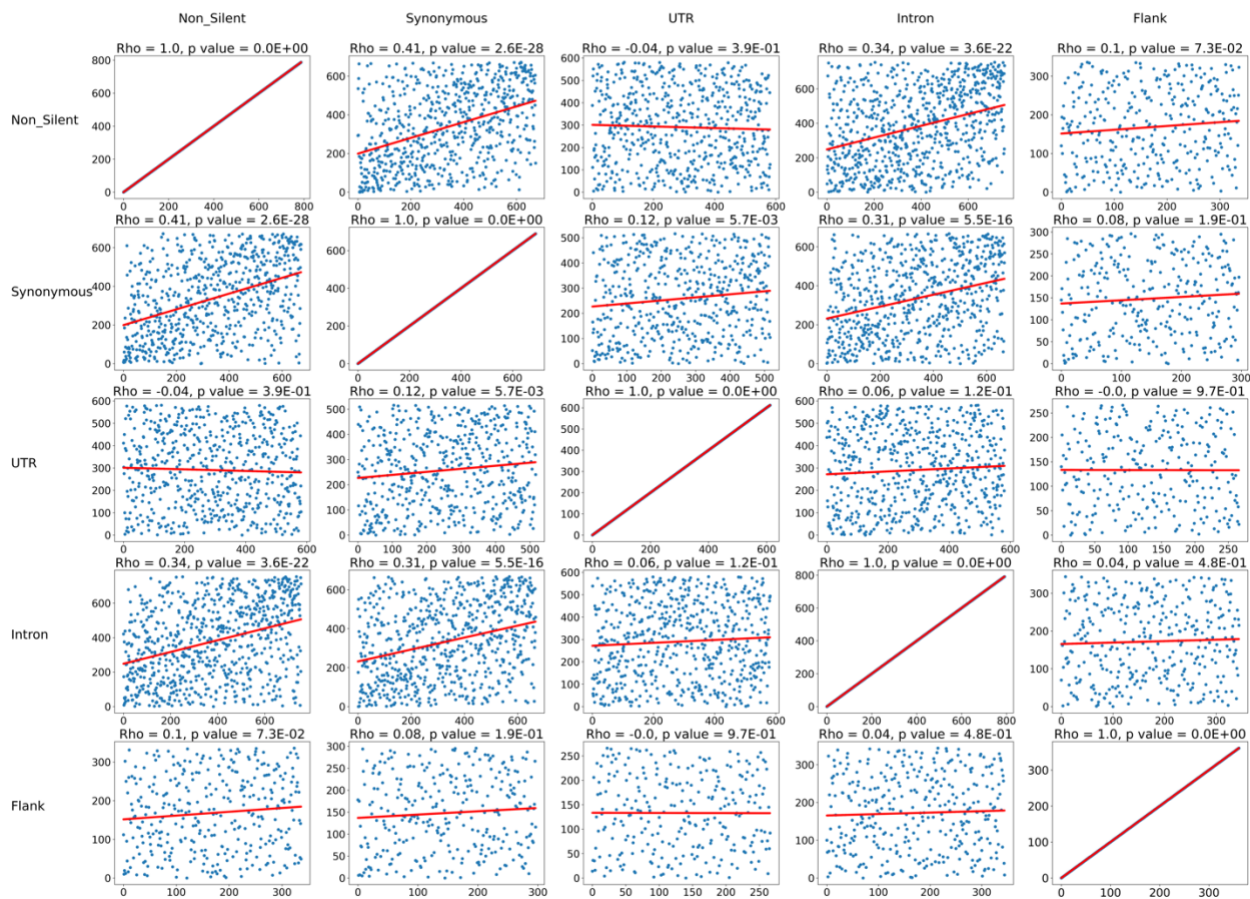

i.

LGG

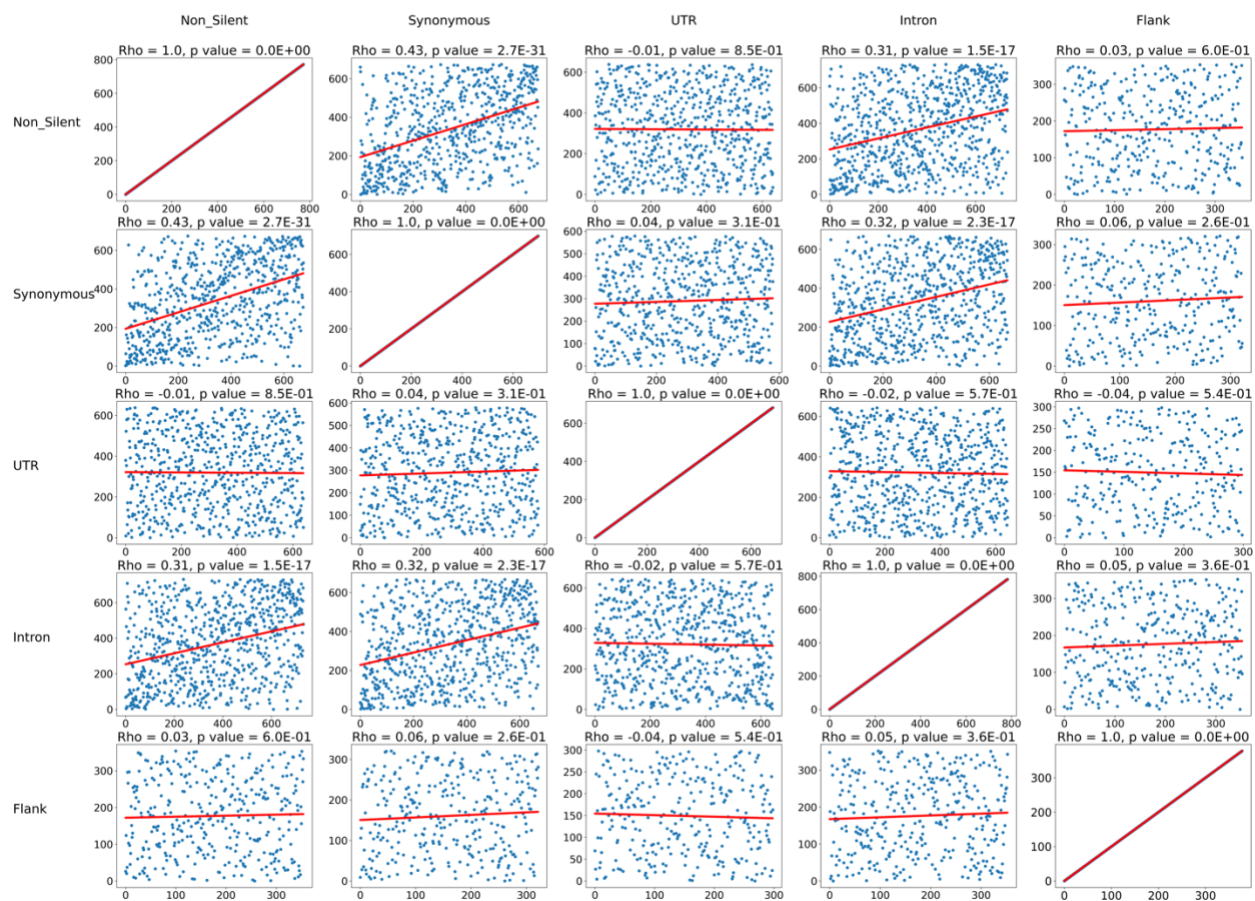

j.

LIHC

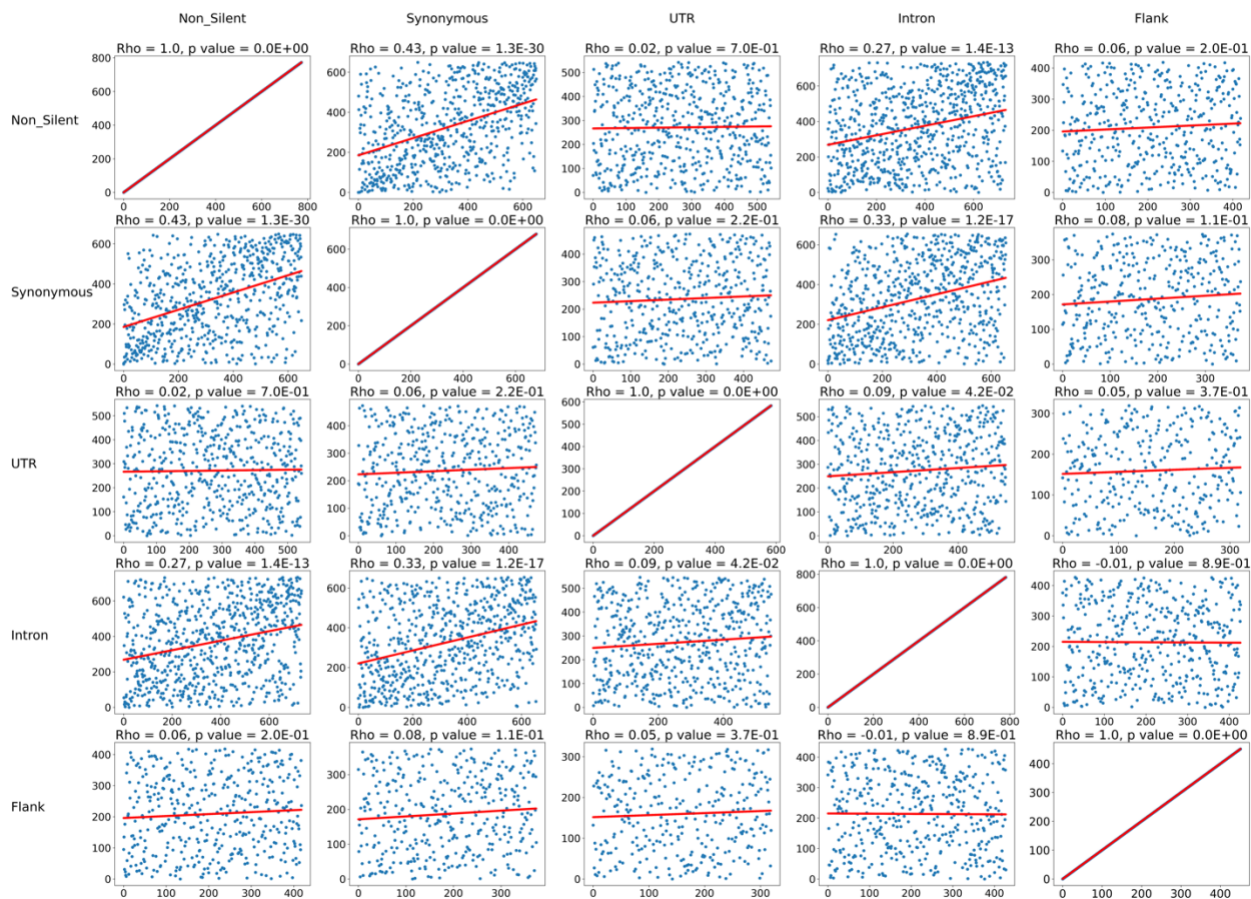

k.

LUAD

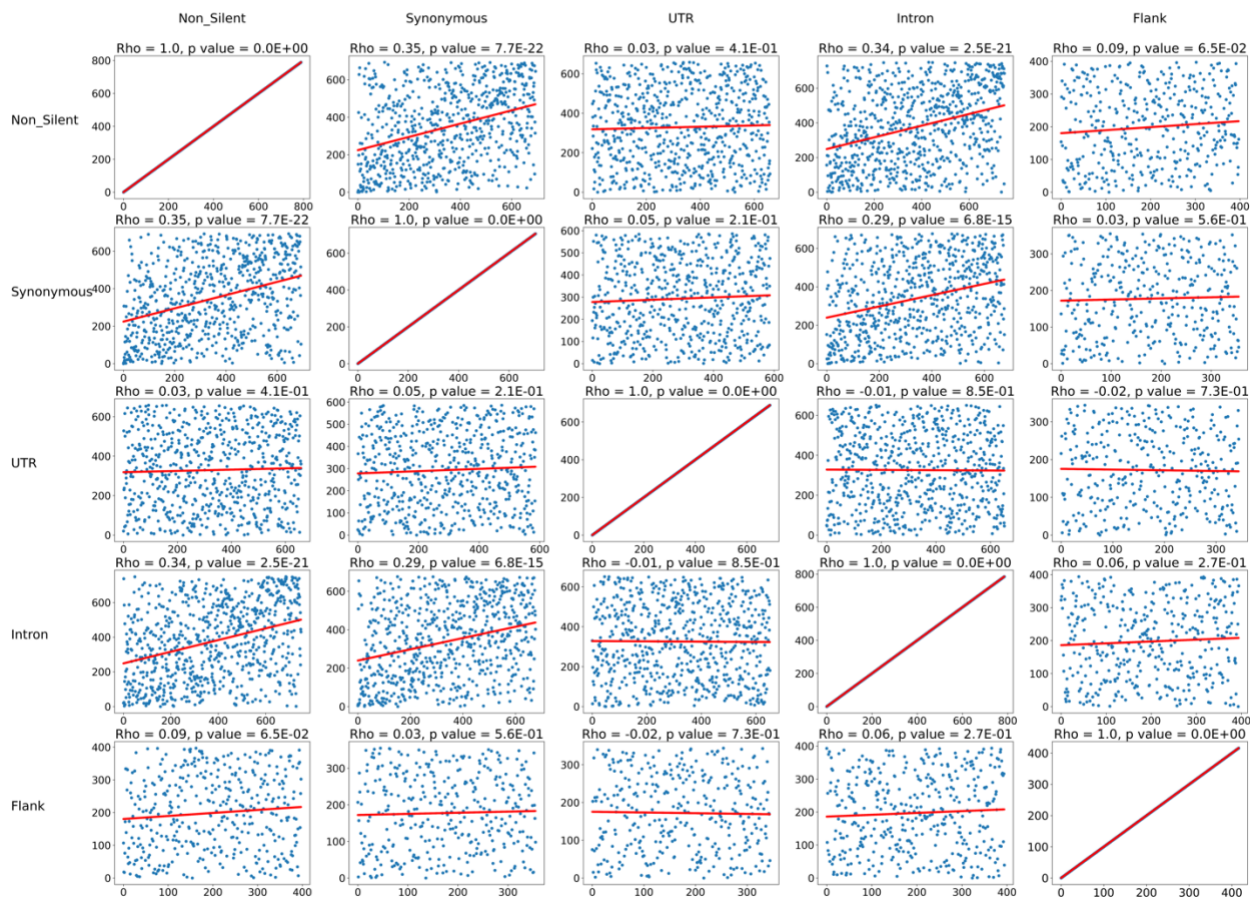



1.

LUSC

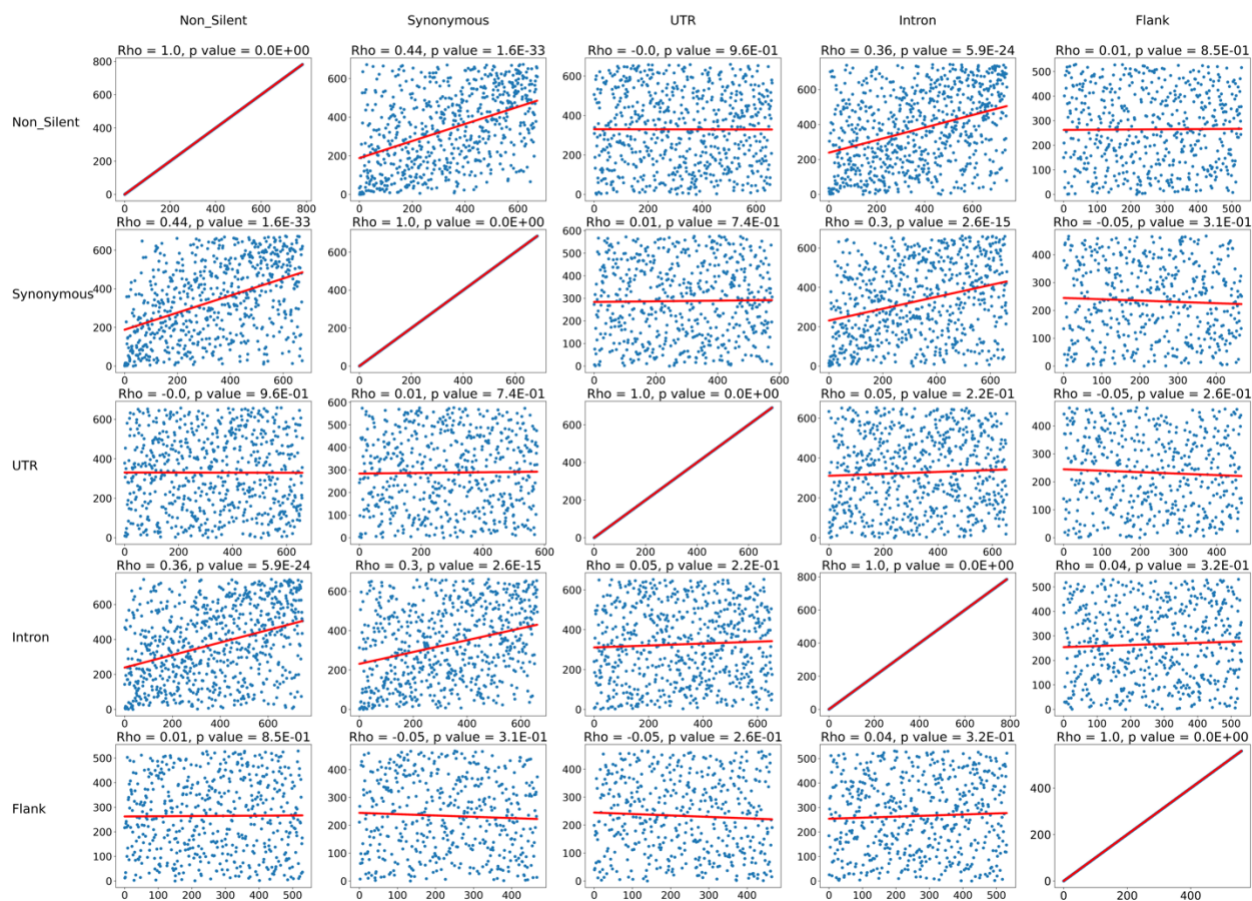

m.

OV

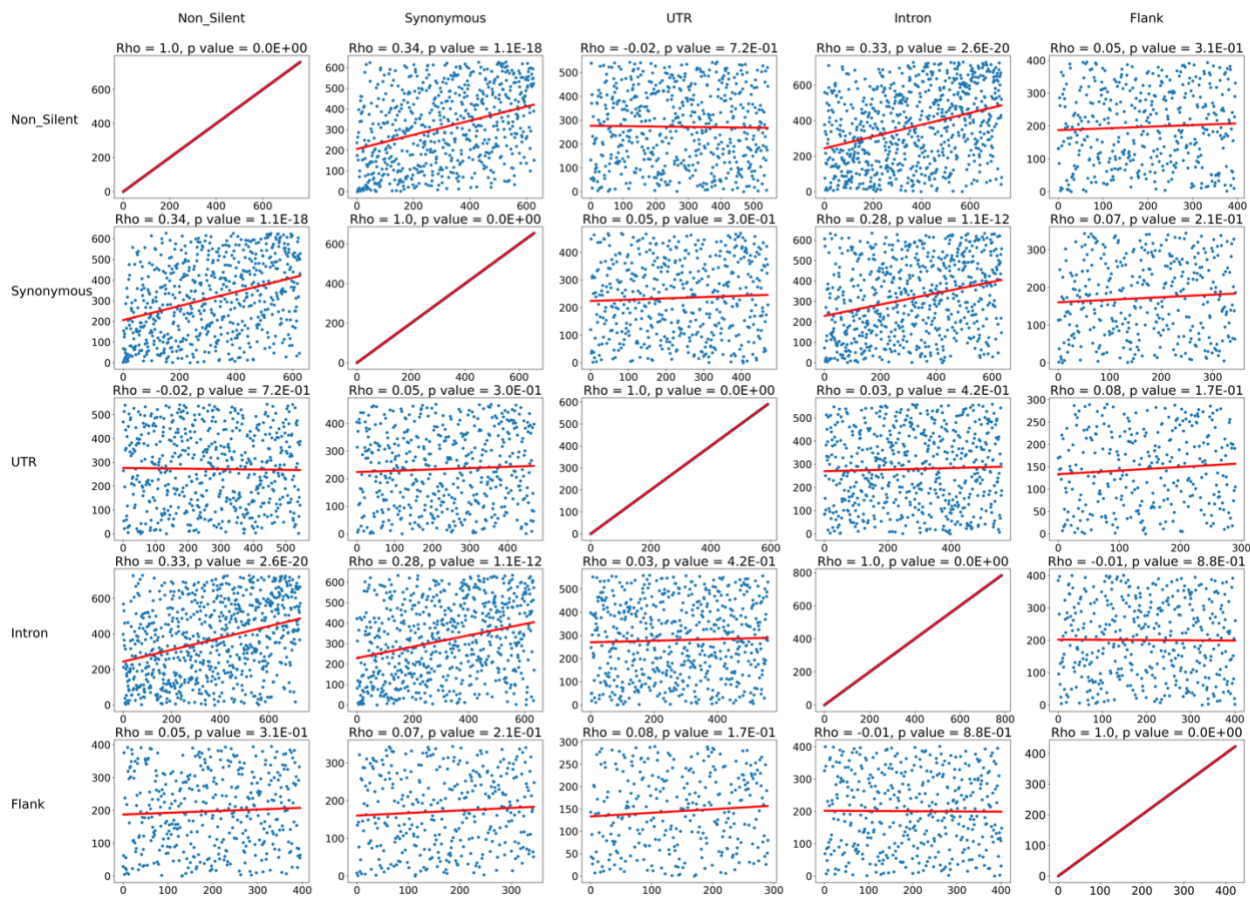

n.

PRAD

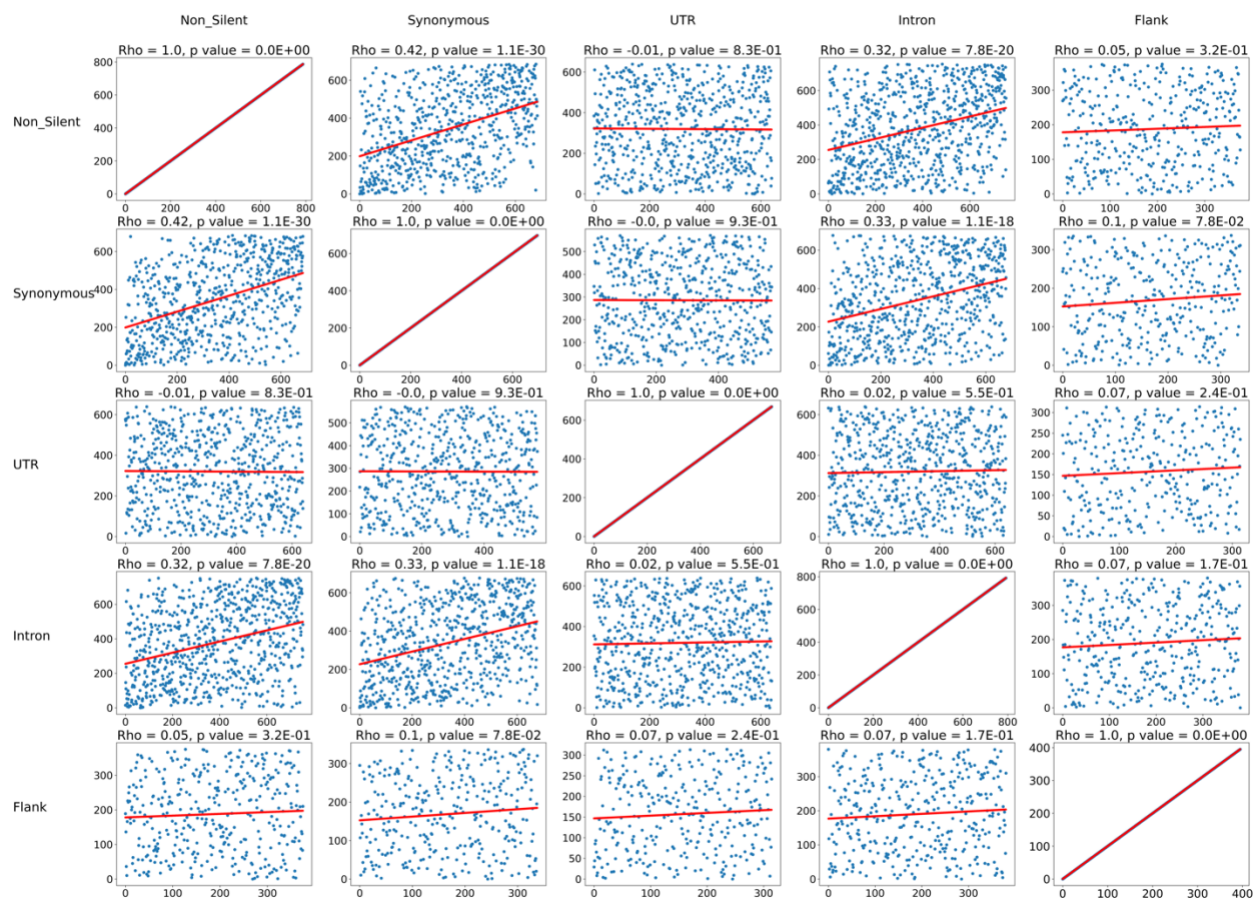

0.

## SARC

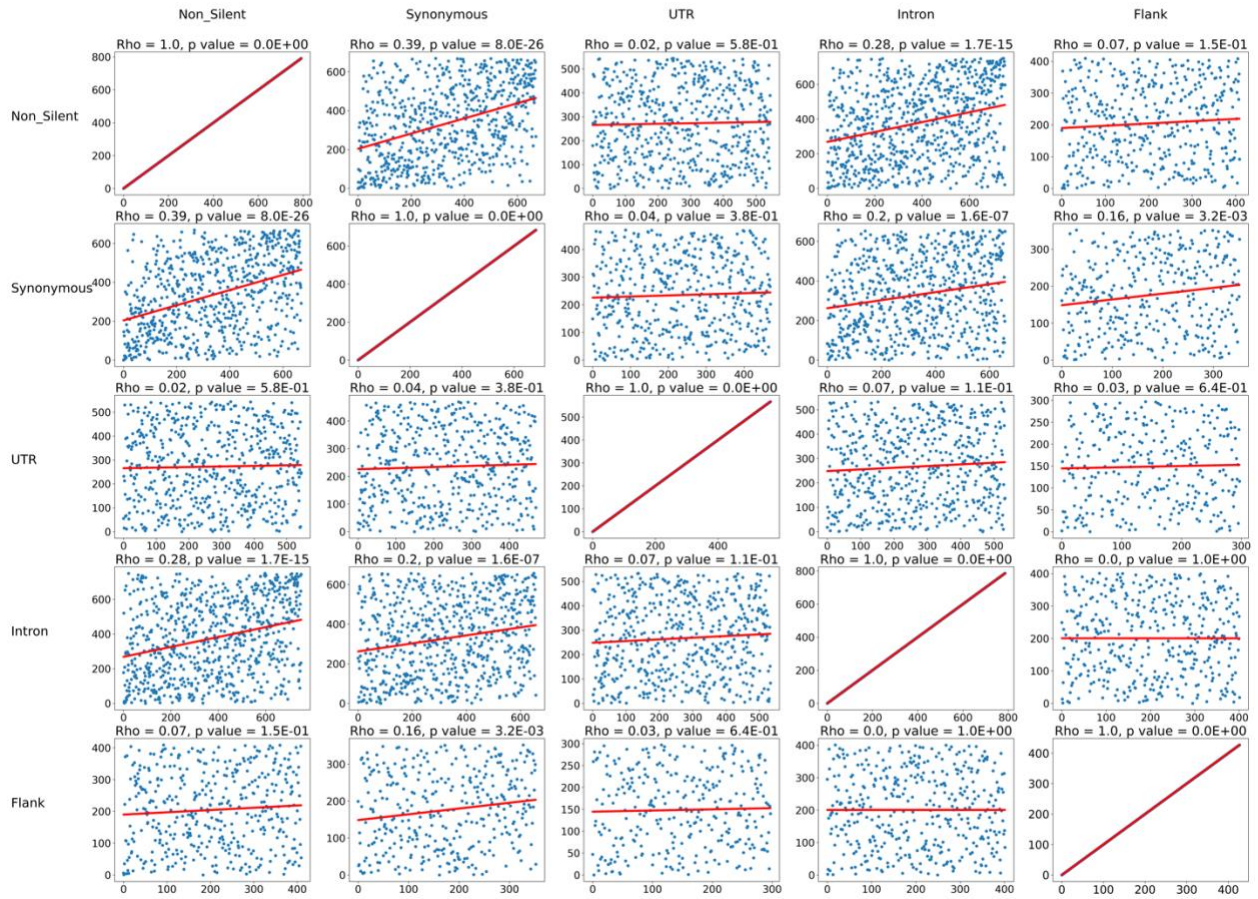

p.

SKCM

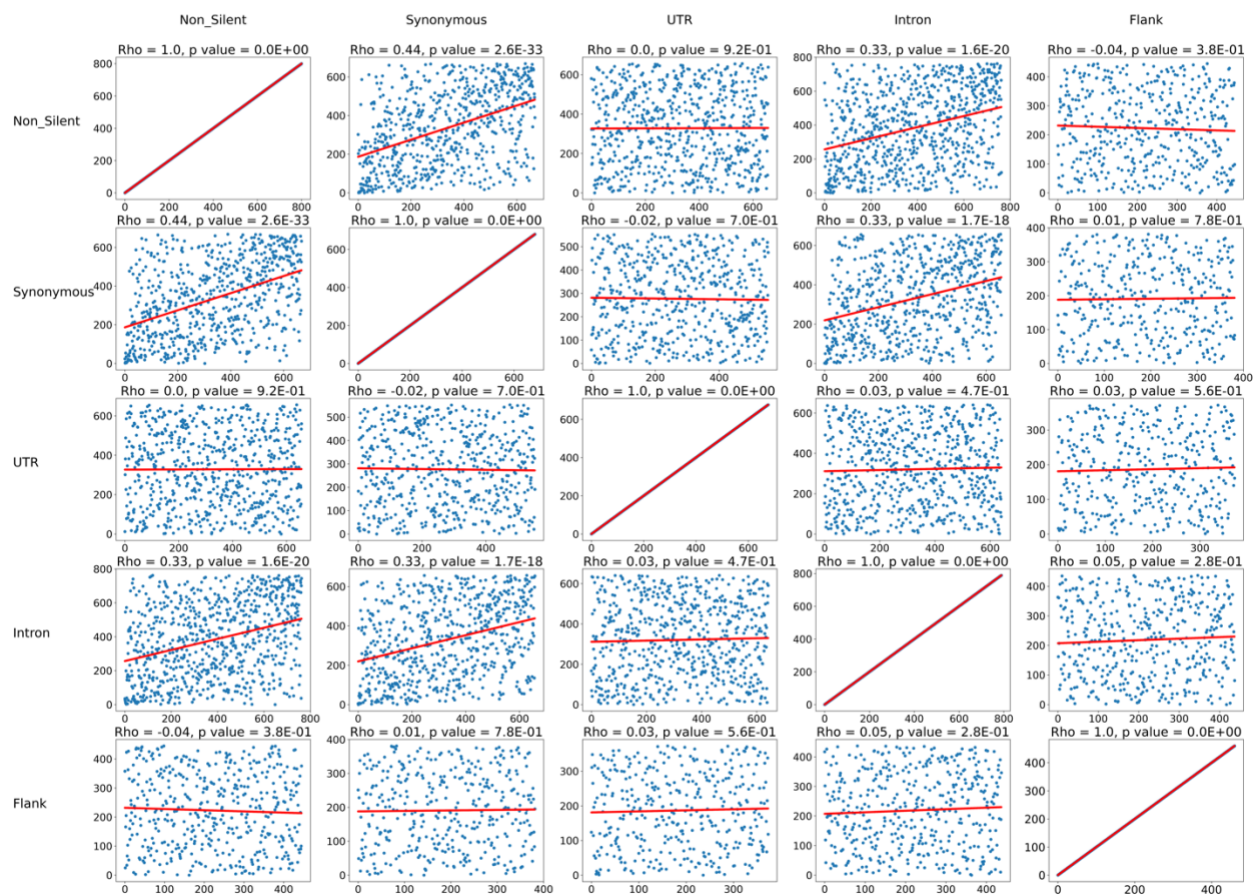

q.

STAD

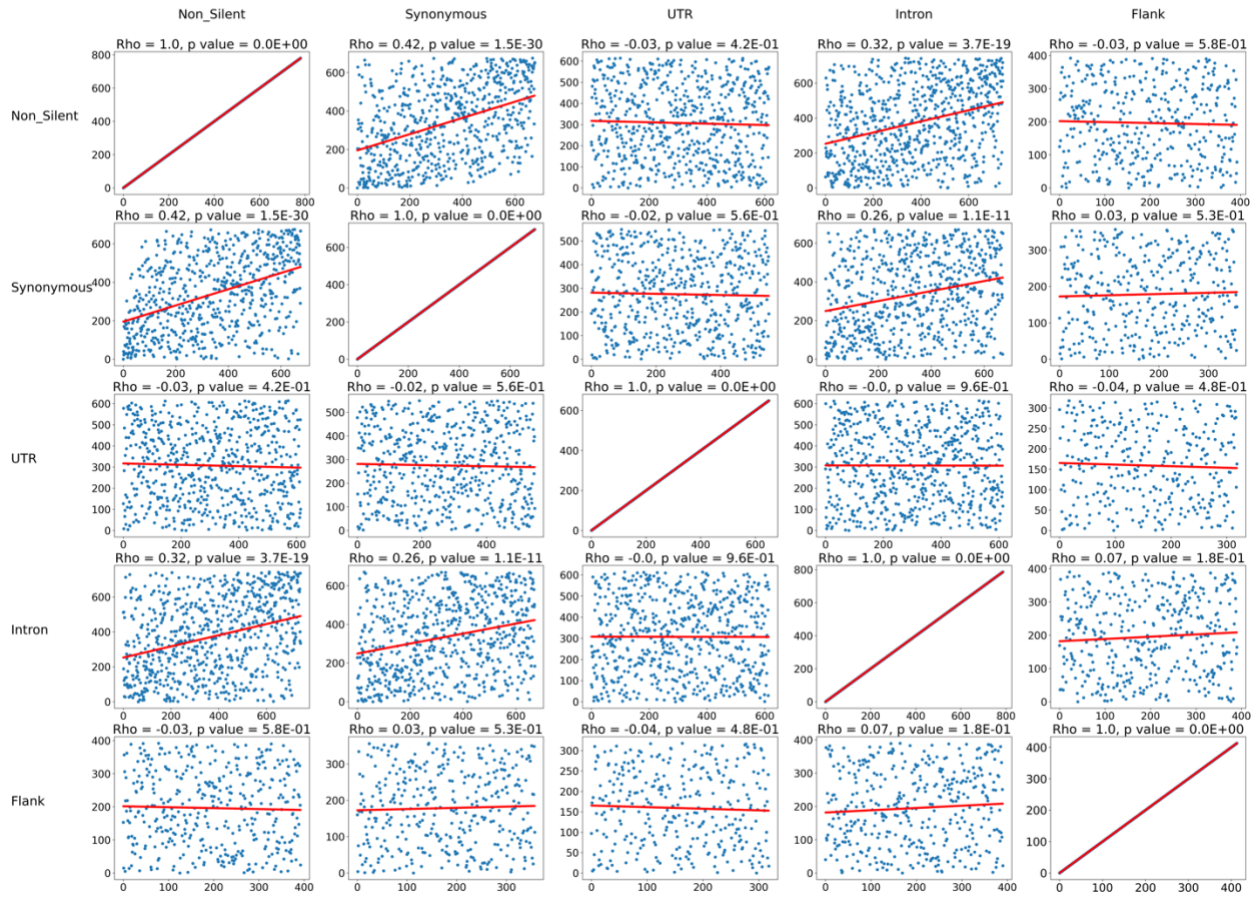

r.

THCA

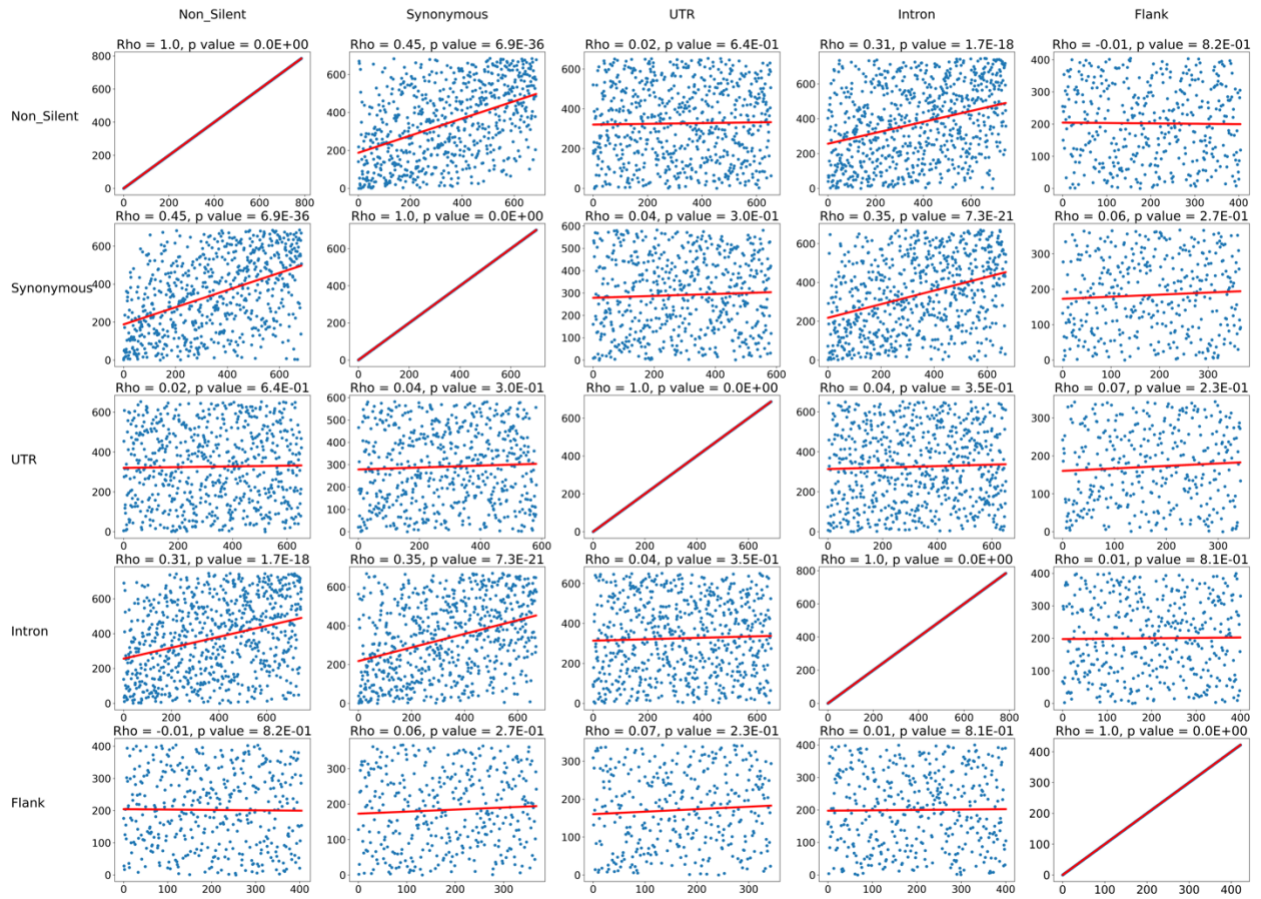

S.

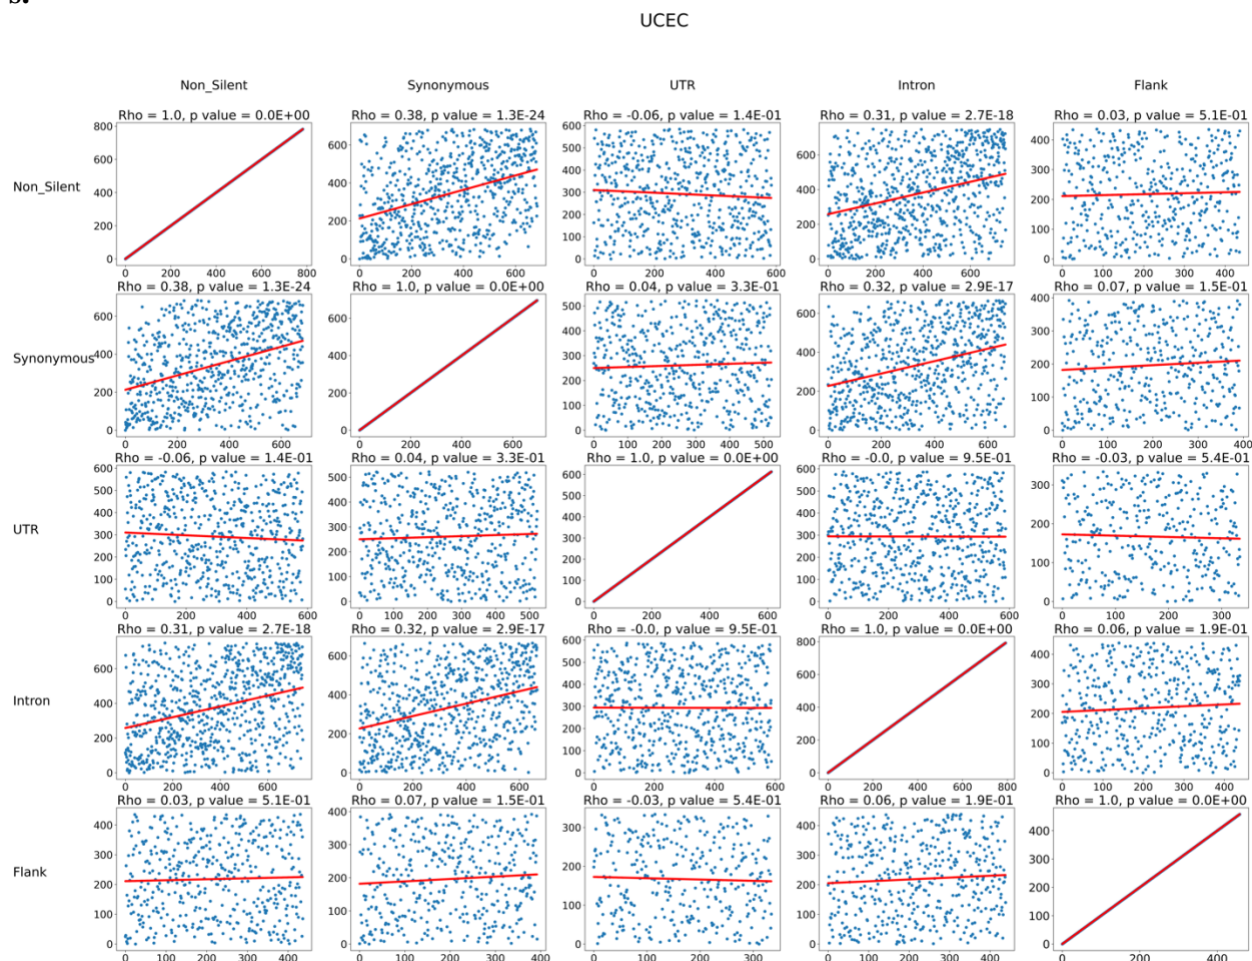

**Supplementary Figure 6: Spearman correlations between gene rankings of pairs of models per cancer type.**

The all-features model was excluded from the analysis. Every subplot (a-s) represents a single cancer type. Within a subplot, every graph depicts the correlation between two models. A dot in the graph represents a gene. The x axis denotes the gene's rank given by the first model and the y axis denotes its rank given by the second model. The Spearman coefficient (Rho) and respective p value are noted above each graph.



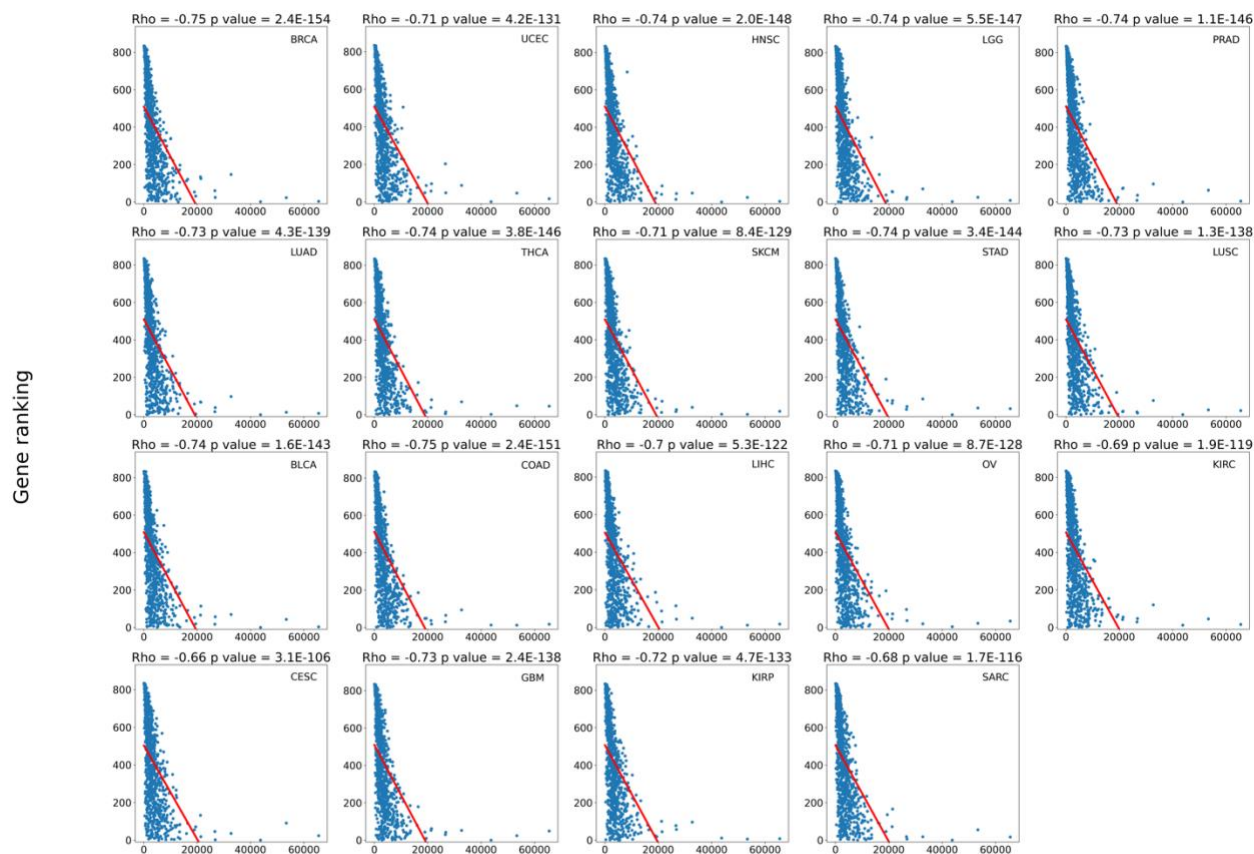

**Supplementary Figure 7: Spearman correlation between the number of mutations documented per gene in the TCGA database and the gene's ranking obtained from the all-features models of the 19 cancer types.** Each graph represents a single cancer type. A dot represents a single gene. The x axis denotes the number of mutations documented in TCGA for the gene and the y axis denotes the gene's ranking obtained from the all-features model. The Spearman coefficient (Rho) and respective p value are noted above each graph.

## Supplementary Tables

**Supplementary Table 1: F1 score improvement gained from adding lower resolution features**

| Cancer Type | High Resolution | High and Medium Resolutions | High, Medium and Low Resolutions | Total Improvement (%) |
|-------------|-----------------|-----------------------------|----------------------------------|-----------------------|
| BRCA        | 0.72            | 0.76                        | 0.83                             | 15.27                 |
| UCEC        | 0.58            | 0.73                        | 0.80                             | 37.99                 |
| HNSC        | 0.31            | 0.34                        | 0.43                             | 38.59                 |
| LGG         | 0.80            | 0.85                        | 0.85                             | 5.79                  |
| PRAD        | 0.34            | 0.43                        | 0.55                             | 59.18                 |
| LUAD        | 0.39            | 0.52                        | 0.63                             | 61.38                 |
| THCA        | 0.63            | 0.64                        | 0.69                             | 10.22                 |
| SKCM        | 0.66            | 0.68                        | 0.78                             | 17.79                 |
| STAD        | 0.32            | 0.35                        | 0.38                             | 20.48                 |
| LUSC        | 0.28            | 0.29                        | 0.44                             | 60.61                 |
| BLCA        | 0.32            | 0.36                        | 0.51                             | 57.63                 |
| COAD        | 0.78            | 0.83                        | 0.87                             | 10.84                 |
| LIHC        | 0.64            | 0.69                        | 0.74                             | 15.92                 |
| OV          | 0.81            | 0.81                        | 0.84                             | 2.70                  |
| KIRC        | 0.57            | 0.68                        | 0.79                             | 38.37                 |
| CESC        | 0.37            | 0.41                        | 0.46                             | 25.46                 |
| GBM         | 0.46            | 0.45                        | 0.50                             | 10.09                 |
| KIRP        | 0.32            | 0.34                        | 0.33                             | 3.93                  |
| SARC        | 0.44            | 0.47                        | 0.50                             | 12.67                 |

The F1 score improvement per cancer type that was achieved by adding medium resolution features and then low resolution features. The results were obtained using the all-features models.

**Supplementary Table 2: Feature type distribution among the top 100 ranked features for each cancer type**

| Cancer\<br>Mutation<br>Category | Non-Silent (%) | Intron (%) | UTR (%) | Flank (%) | Synonymous (%) |
|---------------------------------|----------------|------------|---------|-----------|----------------|
| BLCA                            | 64             | 33         | 0       | 2         | 1              |
| BRCA                            | 51             | 36         | 1       | 5         | 7              |
| CESC                            | 27             | 37         | 21      | 8         | 7              |
| COAD                            | 34             | 42         | 11      | 9         | 4              |
| GBM                             | 58             | 38         | 0       | 0         | 4              |
| HNSC                            | 53             | 39         | 1       | 2         | 5              |
| KIRC                            | 49             | 38         | 3       | 4         | 6              |
| KIRP                            | 53             | 37         | 5       | 4         | 1              |
| LGG                             | 48             | 47         | 0       | 0         | 5              |
| LIHC                            | 25             | 43         | 19      | 8         | 5              |

|      |    |    |    |   |    |
|------|----|----|----|---|----|
| LUAD | 48 | 40 | 0  | 2 | 10 |
| LUSC | 45 | 34 | 2  | 3 | 16 |
| OV   | 44 | 45 | 6  | 2 | 3  |
| PRAD | 52 | 43 | 0  | 2 | 3  |
| SARC | 23 | 34 | 31 | 6 | 6  |
| SKCM | 48 | 36 | 0  | 2 | 14 |
| STAD | 53 | 37 | 2  | 0 | 8  |
| THCA | 59 | 29 | 0  | 1 | 11 |
| UCEC | 43 | 43 | 7  | 5 | 2  |

Feature rankings were obtained from the all-features models.

**Supplementary Table 3: Feature type distribution among the top 10 ranked features for each cancer type**

| Cancer\<br>Mutation<br>Category | Non-Silent (%) | Intron (%) | UTR (%) | Flank (%) | Synonymous<br>(%) |
|---------------------------------|----------------|------------|---------|-----------|-------------------|
| BLCA                            | 80             | 10         | 0       | 10        | 0                 |
| BRCA                            | 60             | 30         | 0       | 10        | 0                 |
| CESC                            | 20             | 10         | 50      | 10        | 10                |
| COAD                            | 40             | 10         | 0       | 10        | 0                 |
| GBM                             | 70             | 30         | 0       | 0         | 0                 |
| HNSC                            | 80             | 10         | 0       | 10        | 0                 |
| KIRC                            | 60             | 40         | 0       | 0         | 0                 |
| KIRP                            | 60             | 40         | 0       | 0         | 0                 |
| LGG                             | 80             | 20         | 0       | 0         | 0                 |
| LIHC                            | 30             | 40         | 20      | 0         | 10                |
| LUAD                            | 100            | 0          | 0       | 0         | 0                 |
| LUSC                            | 90             | 10         | 0       | 0         | 0                 |
| OV                              | 80             | 20         | 0       | 0         | 0                 |
| PRAD                            | 80             | 20         | 0       | 0         | 0                 |
| SARC                            | 30             | 10         | 60      | 0         | 0                 |
| SKCM                            | 90             | 0          | 0       | 0         | 10                |
| STAD                            | 80             | 20         | 0       | 0         | 0                 |
| THCA                            | 80             | 10         | 0       | 0         | 10                |
| UCEC                            | 80             | 10         | 0       | 0         | 10                |

Feature rankings were obtained from the all-features models.

**Supplementary Table 4: Feature resolution distribution in the top 10 features of the models of the classification task**

| Cancer\<br>Mutation<br>Category | All | Non-Silent | Intron | UTR | Flank | Synonymous |
|---------------------------------|-----|------------|--------|-----|-------|------------|
| <b>BLCA</b>                     |     |            |        |     |       |            |
| Low                             | 7   | 6          | 7      | 8   | 4     | 6          |
| Medium                          | 1   | 2          | 3      | 2   | 6     | 3          |
| High                            | 2   | 2          | 0      | 0   | 0     | 1          |
| <b>BRCA</b>                     |     |            |        |     |       |            |
| Low                             | 6   | 6          | 1      | 2   | 4     | 5          |
| Medium                          | 3   | 3          | 8      | 1   | 3     | 1          |
| High                            | 1   | 1          | 1      | 7   | 3     | 4          |
| <b>CESC</b>                     |     |            |        |     |       |            |
| Low                             | 7   | 6          | 2      | 9   | 5     | 4          |
| Medium                          | 3   | 3          | 7      | 1   | 5     | 3          |
| High                            | 0   | 1          | 1      | 0   | 0     | 3          |
| <b>COAD</b>                     |     |            |        |     |       |            |
| Low                             | 2   | 5          | 2      | 4   | 3     | 4          |
| Medium                          | 4   | 2          | 6      | 3   | 4     | 2          |
| High                            | 4   | 3          | 2      | 3   | 3     | 4          |
| <b>GBM</b>                      |     |            |        |     |       |            |
| Low                             | 6   | 6          | 5      | 6   | 3     | 4          |
| Medium                          | 3   | 3          | 2      | 1   | 5     | 2          |
| High                            | 1   | 1          | 3      | 3   | 2     | 4          |
| <b>HNSC</b>                     |     |            |        |     |       |            |
| Low                             | 7   | 5          | 5      | 7   | 4     | 5          |
| Medium                          | 2   | 3          | 3      | 3   | 5     | 3          |
| High                            | 1   | 2          | 2      | 0   | 1     | 2          |
| <b>KIRC</b>                     |     |            |        |     |       |            |
| Low                             | 3   | 5          | 1      | 3   | 3     | 4          |
| Medium                          | 1   | 1          | 3      | 2   | 5     | 3          |
| High                            | 6   | 4          | 6      | 5   | 2     | 3          |
| <b>KIRP</b>                     |     |            |        |     |       |            |
| Low                             | 6   | 5          | 6      | 4   | 3     | 8          |
| Medium                          | 3   | 4          | 3      | 2   | 6     | 2          |
| High                            | 1   | 1          | 1      | 4   | 1     | 0          |
| <b>LGG</b>                      |     |            |        |     |       |            |
| Low                             | 7   | 6          | 8      | 10  | 4     | 7          |
| Medium                          | 2   | 3          | 2      | 0   | 6     | 2          |
| High                            | 1   | 1          | 0      | 0   | 0     | 1          |
| <b>LIHC</b>                     |     |            |        |     |       |            |
| Low                             | 7   | 5          | 5      | 3   | 4     | 4          |
| Medium                          | 2   | 4          | 4      | 4   | 4     | 4          |
| High                            | 1   | 1          | 1      | 3   | 2     | 2          |
| <b>LUAD</b>                     |     |            |        |     |       |            |
| Low                             | 7   | 7          | 8      | 7   | 3     | 6          |
| Medium                          | 2   | 2          | 2      | 3   | 5     | 1          |

|        |   |   |   |   |   |    |
|--------|---|---|---|---|---|----|
| High   | 1 | 1 | 0 | 0 | 2 | 3  |
| LUSC   |   |   |   |   |   |    |
| Low    | 7 | 7 | 7 | 8 | 3 | 6  |
| Medium | 3 | 3 | 2 | 2 | 6 | 2  |
| High   | 0 | 0 | 1 | 0 | 1 | 2  |
| OV     |   |   |   |   |   |    |
| Low    | 3 | 4 | 1 | 4 | 3 | 3  |
| Medium | 2 | 2 | 3 | 5 | 3 | 4  |
| High   | 5 | 4 | 6 | 1 | 4 | 3  |
| PRAD   |   |   |   |   |   |    |
| Low    | 7 | 6 | 9 | 6 | 3 | 8  |
| Medium | 1 | 1 | 1 | 3 | 6 | 1  |
| High   | 2 | 3 | 0 | 1 | 1 | 1  |
| SARC   |   |   |   |   |   |    |
| Low    | 7 | 4 | 2 | 7 | 3 | 6  |
| Medium | 3 | 5 | 8 | 3 | 7 | 1  |
| High   | 0 | 1 | 0 | 0 | 0 | 3  |
| SKCM   |   |   |   |   |   |    |
| Low    | 7 | 7 | 9 | 8 | 2 | 10 |
| Medium | 2 | 2 | 1 | 1 | 7 | 0  |
| High   | 1 | 1 | 0 | 1 | 1 | 0  |
| STAD   |   |   |   |   |   |    |
| Low    | 3 | 1 | 4 | 4 | 3 | 6  |
| Medium | 5 | 1 | 5 | 6 | 5 | 2  |
| High   | 2 | 4 | 1 | 0 | 2 | 2  |
| THCA   |   |   |   |   |   |    |
| Low    | 5 | 5 | 7 | 9 | 4 | 6  |
| Medium | 3 | 2 | 2 | 1 | 6 | 0  |
| High   | 2 | 3 | 1 | 0 | 0 | 4  |
| UCEC   |   |   |   |   |   |    |
| Low    | 7 | 7 | 5 | 6 | 3 | 2  |
| Medium | 2 | 2 | 4 | 2 | 5 | 6  |
| High   | 1 | 1 | 1 | 2 | 2 | 2  |

**Supplementary Table 5: Mutations within genomic positions spanned by the silent features in the 10 top ranked features list of the all-features model that were found to have an impact on regulation**

| Chr   | Gene   | Cancer | S_Pos     | E_Pos     | V_Classification | Mut    | V_Type | Ref_Al | Tum_Al   | Prev    | Splice | miRNA                      | mRNA_L  | polyA | 3D_Fold | Bind_Site |
|-------|--------|--------|-----------|-----------|------------------|--------|--------|--------|----------|---------|--------|----------------------------|---------|-------|---------|-----------|
| chr7  | KMT2C  | BLCA   | 152265211 | 152265211 | Splice_Site      | Intron | SNP    | T      | C        | 11.0294 | Missed | None                       | None    | None  | None    | None      |
| chr7  | KMT2C  | BRCA   | 152265211 | 152265211 | Splice_Site      | Intron | SNP    | T      | C        | 11.437  | Missed | None                       | None    | None  | None    | None      |
| chr8  | PABPC1 | CESC   | 100703049 | 100703050 | 3'UTR            | UTR    | INS    | -      | CCTCT    | 5.2805  | None   | 0: canceled, 1: discovered | None    | None  | None    | None      |
| chr3  | SRGAP3 | CESC   | 8985094   | 8985095   | 3'UTR            | UTR    | DEL    | AT     | -        | 16.5017 | None   | 0: canceled, 1: discovered | None    | None  | None    | None      |
| chr7  | EGFR   | GBM    | 55020559  | 55020560  | Intron           | Intron | INS    | -      | ACACACAC | 0.6849  | None   | None                       | -0.7033 | None  | None    | None      |
| chr7  | KMT2C  | HNSC   | 152265211 | 152265211 | Splice_Site      | Intron | SNP    | T      | C        | 11.6601 | Missed | None                       | None    | None  | None    | None      |
| chr19 | MUC16  | KIRP   | 8896093   | 8896093   | Splice_Region    | Intron | SNP    | A      | C        | 1.4134  | New    | None                       | None    | None  | None    | None      |
| chr17 | TP53   | LUSC   | 7673610   | 7673610   | Splice_Site      | Intron | SNP    | T      | C        | 0.6897  | Missed | None                       | None    | None  | None    | None      |
| chr7  | KMT2C  | PRAD   | 152265211 | 152265211 | Splice_Site      | Intron | SNP    | T      | C        | 11.9675 | Missed | None                       | None    | None  | None    | None      |
| chr3  | SRGAP3 | SARC   | 8985094   | 8985095   | 3'UTR            | UTR    | DEL    | AT     | -        | 23.1076 | None   | 0: canceled, 1: discovered | None    | None  | None    | None      |
| chr3  | SRGAP3 | SARC   | 8985094   | 8985097   | 3'UTR            | UTR    | DEL    | ATAT   | -        | 1.1952  | None   | 0: canceled, 1: discovered | None    | None  | None    | None      |
| chr8  | PABPC1 | SARC   | 100703049 | 100703050 | 3'UTR            | UTR    | INS    | -      | CCTCT    | 5.9761  | None   | 0: canceled, 1: discovered | None    | None  | None    | None      |
| chr2  | LRP1B  | THCA   | 140868264 | 140868264 | Splice_Site      | Intron | SNP    | C      | T        | 0.823   | Missed | None                       | None    | None  | None    | None      |
| chr2  | LRP1B  | THCA   | 140541180 | 140541180 | Intron           | Intron | SNP    | G      | C        | 0.823   | New    | None                       | None    | None  | None    | None      |
| chr2  | LRP1B  | THCA   | 140541105 | 140541105 | Splice_Region    | Intron | SNP    | T      | C        | 0.6173  | New    | None                       | None    | None  | None    | None      |

For each cancer type, we searched for mutations that are in the genomic positions spanned by the top 10 genomic elements (whether they are high, medium or low resolution features) that impact expression regulation. This table lists silent mutations that affected at least 0.5% of patients of a certain cancer type and were found to have an impact on regulation. Columns: Chr – the chromosome in which the mutation occurred. Gene – the gene in which the mutation occurred. Cancer – the patient cohort that was found affected by the mutation. S-Pos – start position of the mutation. E-Pos – end position of the mutation. V\_Classification- variant classification (definition explained in the main text). V\_Type – variant type (definition explained in the main text). Ref-Al – reference allele. The nucleotide context found in the discussed genomic position in the healthy tissue sample of the patient. Tum-Al- Tumor allele. The nucleotide context found in the discussed genomic position in the cancerous tissue of the patient. Prev – Prevalence. Percent of the patients in the cohort which are positive for the mutation. Splice - effect on splicing. “Missed” implies at least one missed site, “New” implies at least one newly discovered site. Threshold set used is (0.95.0.05). Model used is SpliceAI. miRNA - effect on miRNA target site. <number of canceled target sites>, <number of newly discovered sites>. Threshold used is 0.95. Model used is cnnMirTarget. mRNA\_L - percentage of change in mRNA levels. “None” implies that no measurement exists since the mutation position is outside the model range (7000 [3500] US [DS] of TSS). Model used is Xpresso. PolyA - effect on Polyadenylation. Model used is SANPolyA. Threshold used is 0.9. 3D\_Fold - effect on 3D DNA folding. Showing the p-value of the L2 difference if it is less than 0.05, otherwise “None”. We used the model only for 'large' INS and DEL mutations. Model used is Akita. Bind\_Site - effect on the binding sites for the proteins TDP-43, hnRNPA1, and ELAVL1. Model used is DeepCLIP. Threshold used is 0.9.

**Supplementary Table 6: Mutations within genomic positions spanned by the non-silent features in the 10 top ranked features list of the all-features model that were found to have an impact on regulation**

| Chr   | Gene | Cancer | S_Pos     | E_Pos     | V_Classification  | Mut       | V_Type | Ref_Al | Tum_Al | Prev   | Splice     | miRNA | mRNA_L | polyA | 3D_Fold | Bind_Site |
|-------|------|--------|-----------|-----------|-------------------|-----------|--------|--------|--------|--------|------------|-------|--------|-------|---------|-----------|
| chr12 | KRAS | COAD   | 25227343  | 25227343  | Missense_Mutation | Non_Synon | SNP    | G      | T      | 0.7463 | Missed+New | None  | None   | None  | None    | None      |
| chr2  | IDH1 | LGG    | 208248389 | 208248389 | Missense_Mutation | Non_Synon | SNP    | G      | T      | 1.8145 | New        | None  | None   | None  | None    | None      |

For each cancer type, we searched for mutations that are in the genomic positions spanned by the top 10 genomic elements (whether they are high, medium or low resolution features) that impact expression regulation. This table lists non-silent mutations that affected at least 0.5% of patients of a certain cancer type and were found to have an impact on regulation. Columns are as defined for Supplementary Table 6.

**Supplementary Table 7: Performance evaluations for the classification task**

| Cancer | Mutation Type | Accuracy | Precision | Recall   | F1       |
|--------|---------------|----------|-----------|----------|----------|
| BRCA   | Non_Silent    | 0.937888 | 0.704544  | 0.849511 | 0.769981 |
|        | Intron        | 0.922749 | 0.654019  | 0.784039 | 0.712902 |
|        | UTR           | 0.828358 | 0.37717   | 0.611513 | 0.46635  |
|        | Flank         | 0.829786 | 0.412496  | 0.666776 | 0.509443 |
|        | Synonymous    | 0.859363 | 0.453658  | 0.727687 | 0.558721 |
|        | All           | 0.956335 | 0.795073  | 0.867101 | 0.829315 |
|        | Null          | 0.789641 | 0.130435  | 0.127036 | 0.128713 |
| UCEC   | Non_Silent    | 0.973904 | 0.802617  | 0.786335 | 0.794136 |
|        | Intron        | 0.9451   | 0.579184  | 0.531677 | 0.553973 |
|        | UTR           | 0.909762 | 0.367134  | 0.543125 | 0.437673 |
|        | Flank         | 0.861884 | 0.276652  | 0.605    | 0.379452 |
|        | Synonymous    | 0.86745  | 0.250468  | 0.534783 | 0.341057 |
|        | All           | 0.976016 | 0.848071  | 0.763975 | 0.80338  |
|        | Null          | 0.876892 | 0.04878   | 0.049689 | 0.049231 |
| HNSC   | Non_Silent    | 0.931275 | 0.439981  | 0.482895 | 0.460007 |
|        | Intron        | 0.917331 | 0.179814  | 0.1      | 0.127344 |
|        | UTR           | 0.691771 | 0.097277  | 0.489404 | 0.16226  |
|        | Flank         | 0.648888 | 0.101661  | 0.638806 | 0.175396 |
|        | Synonymous    | 0.853187 | 0.138949  | 0.275    | 0.184151 |
|        | All           | 0.938645 | 0.493147  | 0.375658 | 0.425865 |
|        | Null          | 0.886454 | 0.047619  | 0.046053 | 0.046823 |
| LGG    | Non_Silent    | 0.985976 | 0.917313  | 0.839597 | 0.876538 |
|        | Intron        | 0.905857 | 0.250749  | 0.287248 | 0.266849 |
|        | UTR           | 0.696168 | 0.113882  | 0.639716 | 0.193332 |
|        | Flank         | 0.714086 | 0.114297  | 0.668067 | 0.19516  |
|        | Synonymous    | 0.821036 | 0.17737   | 0.55302  | 0.268438 |
|        | All           | 0.983426 | 0.927123  | 0.78255  | 0.84832  |
|        | Null          | 0.883267 | 0.044304  | 0.04698  | 0.045603 |
| PRAD   | Non_Silent    | 0.937211 | 0.476957  | 0.65     | 0.549459 |
|        | Intron        | 0.911275 | 0.291977  | 0.35     | 0.317291 |
|        | UTR           | 0.712747 | 0.1182    | 0.626241 | 0.198848 |
|        | Flank         | 0.705669 | 0.103838  | 0.651327 | 0.179072 |
|        | Synonymous    | 0.823068 | 0.179502  | 0.560135 | 0.271737 |
|        | All           | 0.945339 | 0.535696  | 0.560135 | 0.546281 |
|        | Null          | 0.886056 | 0.027397  | 0.027027 | 0.027211 |
| LUAD   | Non_Silent    | 0.960797 | 0.694768  | 0.583562 | 0.633304 |
|        | Intron        | 0.925219 | 0.244942  | 0.139041 | 0.176895 |

|      |            |          |          |          |          |
|------|------------|----------|----------|----------|----------|
|      | UTR        | 0.69161  | 0.094456 | 0.497241 | 0.158721 |
|      | Flank      | 0.66328  | 0.100228 | 0.63125  | 0.172958 |
|      | Synonymous | 0.865378 | 0.140926 | 0.257534 | 0.181935 |
|      | All        | 0.963187 | 0.750786 | 0.55     | 0.633931 |
|      | Null       | 0.890837 | 0.067568 | 0.068493 | 0.068027 |
| THCA | Non_Silent | 0.964462 | 0.712246 | 0.654795 | 0.681673 |
|      | Intron     | 0.904821 | 0.204717 | 0.220548 | 0.211994 |
|      | UTR        | 0.704921 | 0.099928 | 0.509028 | 0.167024 |
|      | Flank      | 0.664893 | 0.103868 | 0.662205 | 0.17956  |
|      | Synonymous | 0.833466 | 0.162624 | 0.44863  | 0.238598 |
|      | All        | 0.966773 | 0.754053 | 0.637671 | 0.690373 |
|      | Null       | 0.88247  | 0.048485 | 0.054795 | 0.051447 |
| SKCM | Non_Silent | 0.972749 | 0.760282 | 0.748571 | 0.754151 |
|      | Intron     | 0.961474 | 0.743645 | 0.473571 | 0.57747  |
|      | UTR        | 0.884147 | 0.239175 | 0.486331 | 0.320397 |
|      | Flank      | 0.862582 | 0.217401 | 0.535115 | 0.308788 |
|      | Synonymous | 0.943108 | 0.489728 | 0.525    | 0.505752 |
|      | All        | 0.977092 | 0.83123  | 0.74     | 0.782825 |
|      | Null       | 0.889243 | 0.063291 | 0.071429 | 0.067114 |
| STAD | Non_Silent | 0.938566 | 0.418279 | 0.403788 | 0.408131 |
|      | Intron     | 0.947131 | 0.495697 | 0.234091 | 0.317424 |
|      | UTR        | 0.760266 | 0.114449 | 0.522901 | 0.187651 |
|      | Flank      | 0.741256 | 0.101751 | 0.555856 | 0.171875 |
|      | Synonymous | 0.835299 | 0.119194 | 0.333333 | 0.175394 |
|      | All        | 0.950717 | 0.563853 | 0.289394 | 0.380185 |
|      | Null       | 0.899203 | 0.045113 | 0.045455 | 0.045283 |
| LUSC | Non_Silent | 0.940518 | 0.428643 | 0.41145  | 0.41909  |
|      | Intron     | 0.944861 | 0.424263 | 0.142748 | 0.212656 |
|      | UTR        | 0.696208 | 0.07937  | 0.452308 | 0.135017 |
|      | Flank      | 0.68321  | 0.080825 | 0.513043 | 0.139589 |
|      | Synonymous | 0.904382 | 0.169199 | 0.212977 | 0.187997 |
|      | All        | 0.952112 | 0.565177 | 0.365649 | 0.443343 |
|      | Null       | 0.896414 | 0.048951 | 0.053435 | 0.051095 |
| BLCA | Non_Silent | 0.956932 | 0.573842 | 0.454098 | 0.504942 |
|      | Intron     | 0.93498  | 0.199184 | 0.111475 | 0.14176  |
|      | UTR        | 0.710286 | 0.089957 | 0.541322 | 0.154239 |
|      | Flank      | 0.678631 | 0.087791 | 0.626168 | 0.153955 |
|      | Synonymous | 0.818088 | 0.10905  | 0.381148 | 0.169406 |
|      | All        | 0.96239  | 0.699819 | 0.4      | 0.507879 |
|      | Null       | 0.905578 | 0.03252  | 0.032787 | 0.032653 |
| COAD | Non_Silent | 0.984382 | 0.856971 | 0.812397 | 0.833233 |



|      |            |          |          |          |          |
|------|------------|----------|----------|----------|----------|
|      | Intron     | 0.977131 | 0.811269 | 0.68843  | 0.743827 |
|      | UTR        | 0.951835 | 0.499927 | 0.701681 | 0.583307 |
|      | Flank      | 0.953685 | 0.550804 | 0.66     | 0.599686 |
|      | Synonymous | 0.930398 | 0.350549 | 0.519008 | 0.41796  |
|      | All        | 0.988008 | 0.926984 | 0.816529 | 0.867704 |
|      | Null       | 0.906773 | 0.017094 | 0.016529 | 0.016807 |
| LIHC | Non_Silent | 0.969681 | 0.657982 | 0.667857 | 0.662515 |
|      | Intron     | 0.970717 | 0.713465 | 0.577679 | 0.637305 |
|      | UTR        | 0.943889 | 0.427466 | 0.705357 | 0.531883 |
|      | Flank      | 0.920497 | 0.337032 | 0.663063 | 0.446327 |
|      | Synonymous | 0.934781 | 0.356302 | 0.571429 | 0.43881  |
|      | All        | 0.97757  | 0.77274  | 0.705357 | 0.737185 |
|      | Null       | 0.915139 | 0.053097 | 0.053571 | 0.053333 |
| OV   | Non_Silent | 0.983665 | 0.822397 | 0.811607 | 0.816137 |
|      | Intron     | 0.979124 | 0.790378 | 0.727679 | 0.756882 |
|      | UTR        | 0.915651 | 0.282834 | 0.575676 | 0.378783 |
|      | Flank      | 0.874051 | 0.191711 | 0.53619  | 0.28142  |
|      | Synonymous | 0.932311 | 0.352854 | 0.613393 | 0.447241 |
|      | All        | 0.985857 | 0.863324 | 0.8125   | 0.836788 |
|      | Null       | 0.917928 | 0.039216 | 0.035714 | 0.037383 |
| KIRC | Non_Silent | 0.982789 | 0.812534 | 0.692391 | 0.74684  |
|      | Intron     | 0.972191 | 0.766277 | 0.344565 | 0.474916 |
|      | UTR        | 0.904115 | 0.188997 | 0.479348 | 0.270844 |
|      | Flank      | 0.88273  | 0.139699 | 0.402299 | 0.207035 |
|      | Synonymous | 0.94494  | 0.290481 | 0.351087 | 0.317242 |
|      | All        | 0.985936 | 0.8863   | 0.708696 | 0.786285 |
|      | Null       | 0.920319 | 0.042373 | 0.054348 | 0.047619 |
| CESC | Non_Silent | 0.958725 | 0.433989 | 0.438462 | 0.435522 |
|      | Intron     | 0.95753  | 0.379163 | 0.261538 | 0.308398 |
|      | UTR        | 0.930335 | 0.259546 | 0.48022  | 0.336199 |
|      | Flank      | 0.907327 | 0.200561 | 0.466292 | 0.280348 |
|      | Synonymous | 0.920398 | 0.179818 | 0.334066 | 0.233495 |
|      | All        | 0.963984 | 0.509118 | 0.428571 | 0.462837 |
|      | Null       | 0.929084 | 0.042105 | 0.043956 | 0.043011 |
| GBM  | Non_Silent | 0.974303 | 0.729894 | 0.425    | 0.535835 |
|      | Intron     | 0.968486 | 0.62707  | 0.25     | 0.354338 |
|      | UTR        | 0.861718 | 0.105846 | 0.389655 | 0.165602 |
|      | Flank      | 0.766245 | 0.064036 | 0.429487 | 0.111219 |
|      | Synonymous | 0.945179 | 0.246653 | 0.277273 | 0.260476 |
|      | All        | 0.974422 | 0.786253 | 0.372727 | 0.504347 |
|      | Null       | 0.935857 | 0.060241 | 0.056818 | 0.05848  |

|      |            |          |          |          |          |
|------|------------|----------|----------|----------|----------|
| KIRP | Non_Silent | 0.964024 | 0.455122 | 0.296471 | 0.358384 |
|      | Intron     | 0.967052 | 0.5459   | 0.192941 | 0.283395 |
|      | UTR        | 0.910891 | 0.162886 | 0.382353 | 0.228101 |
|      | Flank      | 0.884038 | 0.134347 | 0.412195 | 0.202509 |
|      | Silent     | 0.941594 | 0.168519 | 0.187059 | 0.176377 |
|      | All        | 0.968048 | 0.573311 | 0.236471 | 0.332414 |
|      | Dummy      | 0.930677 | 0.031579 | 0.035294 | 0.033333 |
| SARC | Non_Silent | 0.963984 | 0.408504 | 0.450667 | 0.427206 |
|      | Intron     | 0.967171 | 0.420645 | 0.258667 | 0.31931  |
|      | UTR        | 0.956232 | 0.351003 | 0.522667 | 0.419432 |
|      | Flank      | 0.939686 | 0.28468  | 0.556    | 0.375932 |
|      | Synonymous | 0.930757 | 0.174332 | 0.352    | 0.232866 |
|      | All        | 0.972311 | 0.551    | 0.462667 | 0.500076 |
|      | Null       | 0.939841 | 0.012821 | 0.013333 | 0.013072 |

Accuracy, Precision, Recall and F1 scores of the six models (Non-Silent, Intron, UTR, Flank, Synonymous, All-Features) for classifying the 19 cancer types participating in the cancer type classification task, compared to a null model.

## Supplementary Data

**Supplementary Data 1 (an xlsx file): Feature importance rankings of the cancer type classification task.** Every feature with importance higher than zero is listed. Each sub-table (a-s) holds the feature importance rank of the six models (non-silent, UTR, intron, synonymous, flank and all-features) for a single cancer type.

**Supplementary Data 2 (an xlsx file): Gene Ontology and pathway enrichment.** **a** Non-redundant gene ontology terms that were found significantly enriched ( $p$ -value  $< 0.001$ ,  $FDR < 0.05$ ) for the different combinations of mutation types and cancer types. **b** Gene ontology terms that were found significantly enriched by only a single model. The terms are not split according to the cancer types for which they were found significant. If a term was found significant for one or more cancer types by a single model it will appear the model's GO terms list. **c** Pathways found significantly enriched ( $FDR < 0.05$ ) by the REACTOME pathway analysis for the different combinations of mutation types and cancer types. **d** Pathways found significantly enriched by the REACTOME pathway analysis by only a single model. The terms are not split according to the cancer types for which they were found significant. If a pathway was found significant for one or more cancer types by a single model it will appear the model's pathway list.

**Supplementary Data 3 (an xlsx file): Feature importance rankings of the survival estimation task.** Every feature with importance higher than zero is listed. The table holds the feature importance rank of the six models (non-silent, UTR, intron, synonymous, flank and all-features).
