# Supplementary material for: Estimating the predictive power of silent mutations on cancer classification and prognosis
Source: NPJ Genom Med. 2021 Aug 12;6:67. doi: 10.1038/s41525-021-00229-1 (PMC8361094; doi:10.1038/s41525-021-00229-1)
Supplement: Supplementary file 2 — Supplementary Data 1 [file 41525_2021_229_MOESM2_ESM.xlsx]

## Sheet: Supplementary Data 1a
Supplementary Data 1a: Feature importance obtained by the 6 models classifing BLCA
Model	All-Features			Non-Silent			Intron			UTR			Flank			Synonymous
	Feature	Importance	Gene	Feature	Importance	Gene	Feature	Importance	Gene	Feature	Importance	Gene	Feature	Importance	Gene	Feature	Importance	Gene
0	MUC4 Non_Silent	0.110883	MUC4	MUC4 Non_Silent	0.131108	MUC4	KMT2C Intron	0.0821853	KMT2C	PABPC1 UTR	0.0610813	PABPC1	DUX4 Flank	0.223301	DUX4	MUC4 Synonymous	0.14287	MUC4
1	KDM6A Non_Silent	0.045062	KDM6A	KDM6A Non_Silent	0.0462595	KDM6A	SET 210.0 Intron	0.0291803	SET	FAM46C UTR	0.045572	FAM46C	DUX4 43.0 Flank	0.0531816	DUX4	195785775-195785775-chr3-Synonymous-SNP-C-C-G	0.0195949	MUC4
2	DUX4 Flank	0.0386906	DUX4	ELF3 Non_Silent	0.0257877	ELF3	SEPT9 3283.0 Intron	0.0152183	SEPT9	PAX3 UTR	0.0356175	PAX3	MLLT4 2902.0 Flank	0.0376078	MLLT4	AK2 5.0 Synonymous	0.013112	AK2
3	KMT2C Intron	0.0273291	KMT2C	11110877-11110879-chr5-In_Frame_Del-DEL-TTC-TTC--	0.0216854	CTNND2	PRKAR1A 358.0 Intron	0.0113832	PRKAR1A	BCR UTR	0.0217888	BCR	U2 Flank	0.0322399	U2	MUC16 Synonymous	0.0120488	MUC16
4	ELF3 Non_Silent	0.0198266	ELF3	CDKN1A Non_Silent	0.0193819	CDKN1A	DCC Intron	0.0109851	DCC	TRIM2 UTR	0.0191775	TRIM2	AK2 0.0 Flank	0.0184413	AK2	CHEK2 29.0 Synonymous	0.0113092	CHEK2
5	RB1 Non_Silent	0.019621	RB1	RB1 Non_Silent	0.0185411	RB1	CNTNAP2 Intron	0.0109407	CNTNAP2	TEC 1858.0 UTR	0.0170216	TEC	RGPD3 0.0 Flank	0.0142128	RGPD3	KMT2C Synonymous	0.0112086	KMT2C
6	140753336-140753336-chr7-Missense_Mutation-SNP-A-A-T	0.0155364	BRAF	BRAF 378.0 Non_Silent	0.0146955	BRAF	ELF3 Intron	0.0102828	ELF3	TEC UTR	0.0102161	TEC	LARP4 0.0 Flank	0.0130458	LARP4	LHFP Synonymous	0.00949458	LHFP
7	CDKN1A Non_Silent	0.0138227	CDKN1A	KMT2D Non_Silent	0.0127526	KMT2D	PDE4D Intron	0.00962936	PDE4D	HLA-A UTR	0.00955359	HLA-A	BCR 2758.0 Flank	0.012525	BCR	MUC16 2239.0 Synonymous	0.00839412	MUC16
8	11110877-11110879-chr5-In_Frame_Del-DEL-TTC-TTC--	0.0123345	CTNND2	IDH1 244.0 Non_Silent	0.0115459	IDH1	TET2 Intron	0.00883133	TET2	PAX3 29.0 UTR	0.00947323	PAX3	WT1 Flank	0.0120665	WT1	HLA-A Synonymous	0.00662843	HLA-A
9	IDH1 244.0 Non_Silent	0.0121704	IDH1	140753336-140753336-chr7-Missense_Mutation-SNP-A-A-T	0.01058	BRAF	PARG Intron	0.0074754	PARG	LARP4 UTR	0.00929104	LARP4	BCR Flank	0.011503	BCR	AK2 Synonymous	0.00652228	AK2
10	FGFR3 Non_Silent	0.0104771	FGFR3	FGFR3 Non_Silent	0.0105038	FGFR3	BRCA1 255.0 Intron	0.00576315	BRCA1	26475271-26475271-chr1-3'UTR-SNP-G-G-T	0.00888448	HMGN2	MALAT1 Flank	0.0113898	MALAT1	28689180-28689180-chr22-Synonymous-SNP-C-C-G	0.00636716	CHEK2
11	KMT2D Non_Silent	0.0101778	KMT2D	CTNND2 2781.0 Non_Silent	0.0104114	CTNND2	SET Intron	0.00574504	SET	EXT1 UTR	0.00875686	EXT1	MALAT1 0.0 Flank	0.0105116	MALAT1	HLA-A 32.0 Synonymous	0.00625778	HLA-A
12	DCC Intron	0.00916193	DCC	115076417-115076417-chr9-Missense_Mutation-SNP-G-G-T	0.010176	TNC	CHST11 Intron	0.00566055	CHST11	ID2 65.0 UTR	0.00861445	ID2	CRTC1 0.0 Flank	0.00983054	CRTC1	MUC16 1895.0 Synonymous	0.00623412	MUC16
13	208248388-208248388-chr2-Missense_Mutation-SNP-C-C-T	0.0083473	IDH1	208248388-208248388-chr2-Missense_Mutation-SNP-C-C-T	0.00998918	IDH1	LRP1B Intron	0.005566	LRP1B	HIP1 UTR	0.00831076	HIP1	39405360-39405360-chr17-3'Flank-SNP-A-A-G	0.00940735	MED1	WHSC1L1 Synonymous	0.00600212	WHSC1L1
14	BRAF 378.0 Non_Silent	0.00648205	BRAF	CTNND2 Non_Silent	0.00789196	CTNND2	SKI Intron	0.00553571	SKI	PLAG1 UTR	0.00821455	PLAG1	1295113-1295113-chr5-5'Flank-SNP-G-G-A	0.00834065	TERT	PIK3R1 Synonymous	0.00597452	PIK3R1
15	MUC4 Synonymous	0.00621202	MUC4	GLI1 124.0 Non_Silent	0.00784414	GLI1	DDR2 2952.0 Intron	0.0053136	DDR2	CD209 UTR	0.00779105	CD209	LARP4 Flank	0.00833043	LARP4	MUC4 780.0 Synonymous	0.00596352	MUC4
16	115076417-115076417-chr9-Missense_Mutation-SNP-G-G-T	0.0061316	TNC	72787695-72787697-chr16-In_Frame_Del-DEL-GCC-GCC--	0.00693789	ZFHX3	FANCD2 Intron	0.00482397	FANCD2	SDHA UTR	0.00773764	SDHA	33010691-33010691-chr1-3'Flank-SNP-A-A-G	0.00769476	AK2	SDHA Synonymous	0.00593653	SDHA
17	FAM135B 54.0 Non_Silent	0.00569849	FAM135B	LRP1B Non_Silent	0.00686719	LRP1B	AFF3 9233.0 Intron	0.00478021	AFF3	TBL1X UTR	0.00755893	TBL1X	MALAT1 33.0 Flank	0.00742929	MALAT1	FAT4 Synonymous	0.00553799	FAT4
18	CTNND2 2781.0 Non_Silent	0.00533934	CTNND2	FAM135B Non_Silent	0.00685849	FAM135B	CSMD3 Intron	0.00467244	CSMD3	RSPO3 1550.0 UTR	0.00716674	RSPO3	MLLT4 0.0 Flank	0.00733653	MLLT4	MECOM Synonymous	0.00547268	MECOM
19	72787695-72787697-chr16-In_Frame_Del-DEL-GCC-GCC--	0.00533762	ZFHX3	KMT2C Non_Silent	0.00668629	KMT2C	152235812-152235812-chr7-Splice_Region-SNP-C-C-A	0.00448387	KMT2C	CDKN2A UTR	0.00698757	CDKN2A	DDX6 Flank	0.0068565	DDX6	33013271-33013271-chr1-Synonymous-SNP-G-G-A	0.00539918	AK2
20	STAG2 Non_Silent	0.00522599	STAG2	MYH9 Non_Silent	0.00646683	MYH9	6955365-6955365-chr12-Splice_Region-SNP-A-A-C	0.00448108	PTPN6	MSN UTR	0.00658367	MSN	RGS7 0.0 Flank	0.00682702	RGS7	33013253-33013253-chr1-Synonymous-SNP-G-G-A	0.00530609	AK2
21	LRP1B Intron	0.00460224	LRP1B	1801841-1801841-chr4-Missense_Mutation-SNP-C-C-G	0.00598172	FGFR3	PTK6 Intron	0.00431849	PTK6	PAX3 23.0 UTR	0.00636785	PAX3	190179673-190179673-chr4-3'Flank-SNP-G-G-C	0.00653239	DUX4	RANBP2 Synonymous	0.00528713	RANBP2
22	ARID1A Non_Silent	0.00445552	ARID1A	STAG2 Non_Silent	0.00594924	STAG2	EZH2 427.0 Intron	0.0040346	EZH2	60553287-60553289-chr2-5'UTR-DEL-GGC-GGC--	0.00633681	BCL11A	190179606-190179606-chr4-3'Flank-SNP-G-G-T	0.00601953	DUX4	ROS1 2029.0 Synonymous	0.00517562	ROS1
23	DUX4 43.0 Flank	0.00433439	DUX4	CTNNB1 744.0 Non_Silent	0.0056913	CTNNB1	SND1 Intron	0.00394908	SND1	ISX UTR	0.00613474	ISX	PAX8 Flank	0.00579879	PAX8	ROS1 Synonymous	0.00512908	ROS1
24	CSMD3 Intron	0.00429301	CSMD3	HOXA9 25.0 Non_Silent	0.00563344	HOXA9	MUC16 Intron	0.00392533	MUC16	PPP6C UTR	0.00590052	PPP6C	U2 4.0 Flank	0.0057149	U2	EZR Synonymous	0.00483482	EZR
25	MYH9 Non_Silent	0.00389283	MYH9	PIK3CA Non_Silent	0.00525175	PIK3CA	KMT2D Intron	0.00382744	KMT2D	256477-256477-chr5-3'UTR-SNP-T-T-C	0.00586109	SDHA	33010795-33010795-chr1-3'Flank-SNP-G-G-A	0.00545791	AK2	195786549-195786549-chr3-Synonymous-SNP-G-G-A	0.00472427	MUC4
26	FAM135B Non_Silent	0.00381803	FAM135B	RUNX1T1 Non_Silent	0.00514029	RUNX1T1	TG Intron	0.00358712	TG	PTPRT UTR	0.00580412	PTPRT	SP1 Flank	0.0054383	SP1	CLIP1 1107.0 Synonymous	0.00463787	CLIP1
27	EP300 Non_Silent	0.00377087	EP300	EGFR Non_Silent	0.00505347	EGFR	MUC16 946.0 Intron	0.0034092	MUC16	HNRNPA2B1 UTR	0.00549822	HNRNPA2B1	PMS2 719.0 Flank	0.00542779	PMS2	CR1 Synonymous	0.00443242	CR1
28	FGFR3 161.0 Non_Silent	0.00376252	FGFR3	ARID1A Non_Silent	0.00499561	ARID1A	ERBB3 Intron	0.00337917	ERBB3	RNF4 UTR	0.00536367	RNF4	65501009-65501009-chr11-3'Flank-DEL-T-T--	0.00541186	MALAT1	KMT2C 2776.0 Synonymous	0.00419417	KMT2C
29	ERBB2 238.0 Non_Silent	0.00371373	ERBB2	ERBB2 238.0 Non_Silent	0.00491695	ERBB2	HLA-A Intron	0.00331022	HLA-A	NF2 UTR	0.00523913	NF2	33010831-33010832-chr1-3'Flank-INS-----GGATGT	0.00540254	AK2	KMT2D 406.0 Synonymous	0.00411655	KMT2D
30	LRP1B Non_Silent	0.00331669	LRP1B	IRS4 Non_Silent	0.00488122	IRS4	ROS1 810.0 Intron	0.00323891	ROS1	FGFR3 272.0 UTR	0.00493478	FGFR3	33012985-33012986-chr1-3'Flank-DEL-CA-CA--	0.00525572	AK2	ABL2 Synonymous	0.0040571	ABL2
31	PRKAR1A 358.0 Intron	0.00325504	PRKAR1A	GLI1 Non_Silent	0.00478835	GLI1	BCL9L 187.0 Intron	0.00297064	BCL9L	GNAS UTR	0.00491562	GNAS	VAV1 Flank	0.00490492	VAV1	AFF4 Synonymous	0.00397397	AFF4
32	ERBB3 Non_Silent	0.00322125	ERBB3	RGPD3 Non_Silent	0.00457658	RGPD3	ITGAV 713.0 Intron	0.00291692	ITGAV	ID1 UTR	0.00490904	ID1	MLLT4 Flank	0.00487086	MLLT4	46739345-46739345-chr11-Synonymous-SNP-C-C-T	0.00383364	F2
33	PIK3CA Non_Silent	0.00321153	PIK3CA	MUC16 Non_Silent	0.00456027	MUC16	CRTC1 Intron	0.00291151	CRTC1	FAM46C 439.0 UTR	0.00456344	FAM46C	190179651-190179651-chr4-3'Flank-SNP-C-C-A	0.00449318	DUX4	POT1 Synonymous	0.0037178	POT1
34	EZH2 427.0 Intron	0.00318143	EZH2	ZFHX3 113.0 Non_Silent	0.00452849	ZFHX3	CARD11 Intron	0.00288115	CARD11	SS18 UTR	0.0043919	SS18	FANCD2 0.0 Flank	0.0043072	FANCD2	SPEN Synonymous	0.00359694	SPEN
35	HOXA9 25.0 Non_Silent	0.00313968	HOXA9	HSP90AA1 Non_Silent	0.0043635	HSP90AA1	FAM135B Intron	0.00283354	FAM135B	EIF3E 3.0 UTR	0.00435071	EIF3E	XPA 451.0 Flank	0.00428776	XPA	27095700-27095700-chr7-Synonymous-SNP-G-G-A	0.00356645	HOXA1
36	6955365-6955365-chr12-Splice_Region-SNP-A-A-C	0.00313611	PTPN6	NF1 Non_Silent	0.00434623	NF1	COL1A1 Intron	0.00277708	COL1A1	SDHA 765.0 UTR	0.0042869	SDHA	RUNX1 Flank	0.00427956	RUNX1	PABPC1 Synonymous	0.00347657	PABPC1
37	1801841-1801841-chr4-Missense_Mutation-SNP-C-C-G	0.00313089	FGFR3	PLAG1 Non_Silent	0.00433267	PLAG1	USP6 Intron	0.00275097	USP6	MYH9 UTR	0.00424412	MYH9	CYP2C8 Flank	0.00424668	CYP2C8	MUC16 760.0 Synonymous	0.00345654	MUC16
38	TSHR Intron	0.00312121	TSHR	TP53 108.0 Non_Silent	0.00431123	TP53	NTRK3 Intron	0.00271155	NTRK3	PRDM16 UTR	0.00409043	PRDM16	TFRC 0.0 Flank	0.00416878	TFRC	SRGAP3 Synonymous	0.00345154	SRGAP3
39	MYO5A Non_Silent	0.00304615	MYO5A	45089894-45089894-chrX-Missense_Mutation-SNP-T-T-G	0.0042862	KDM6A	NUP98 91.0 Intron	0.0026956	NUP98	CBL UTR	0.00406147	CBL	AK2 Flank	0.00412417	AK2	NF2 Synonymous	0.00337807	NF2
40	GLI1 124.0 Non_Silent	0.00304459	GLI1	EP300 Non_Silent	0.00422257	EP300	SETBP1 Intron	0.00268927	SETBP1	MALAT1 UTR	0.00401624	MALAT1	RDM1 0.0 Flank	0.00394593	RDM1	195785760-195785760-chr3-Synonymous-SNP-A-A-G	0.00333141	MUC4
41	HSP90AA1 Non_Silent	0.00302685	HSP90AA1	ERBB3 Non_Silent	0.00396402	ERBB3	C5 Intron	0.00262481	C5	CR1 UTR	0.00392947	CR1	CRTC1 Flank	0.00385838	CRTC1	MUC4 781.0 Synonymous	0.00320094	MUC4
42	CTNND2 Non_Silent	0.0029861	CTNND2	MYO5A 284.0 Non_Silent	0.00378679	MYO5A	MDM2 Intron	0.00258286	MDM2	DAXX UTR	0.00390582	DAXX	RGPD3 1269.0 Flank	0.00384367	RGPD3	PDE4DIP 2403.0 Synonymous	0.00311044	PDE4DIP
43	45089894-45089894-chrX-Missense_Mutation-SNP-T-T-G	0.00297018	KDM6A	ASXL2 Non_Silent	0.00374005	ASXL2	PAX3 1877.0 Intron	0.00255722	PAX3	DEK 812.0 UTR	0.00378965	DEK	33010803-33010803-chr1-3'Flank-SNP-T-T-G	0.00383057	AK2	FAM47C Synonymous	0.00307325	FAM47C
44	FAT4 1973.0 Non_Silent	0.00294965	FAT4	CREBBP 272.0 Non_Silent	0.00346716	CREBBP	RB1 Intron	0.00255676	RB1	SDHC UTR	0.00376943	SDHC	10738697-10738697-chr22-5'Flank-SNP-A-A-C	0.00381593	U2	NONO Synonymous	0.00303747	NONO
45	EGFR Non_Silent	0.00291197	EGFR	RMI2 Non_Silent	0.00345505	RMI2	LPP Intron	0.00255077	LPP	LSM14A 1099.0 UTR	0.00374927	LSM14A	BCL11A 0.0 Flank	0.00376917	BCL11A	RECQL 435.0 Synonymous	0.00303006	RECQL
46	MAP3K13 Intron	0.00274823	MAP3K13	ERCC2 Non_Silent	0.00336428	ERCC2	136275718-136275719-chr6-Intron-DEL-AC-AC--	0.00249997	BCLAF1	FANCA UTR	0.00370745	FANCA	190179715-190179715-chr4-3'Flank-SNP-C-C-A	0.00362377	DUX4	USP8 Synonymous	0.00302774	USP8
47	PRKAR1A 278.0 Non_Silent	0.0027338	PRKAR1A	EPHA7 365.0 Non_Silent	0.0033609	EPHA7	NRG1 Intron	0.0024959	NRG1	FGFR1OP UTR	0.003625	FGFR1OP	FOXO4 Flank	0.00359636	FOXO4	33013277-33013277-chr1-Synonymous-SNP-G-G-A	0.00300153	AK2
48	TG Intron	0.00266535	TG	HLA-A Non_Silent	0.00335793	HLA-A	HRAS Intron	0.00248416	HRAS	DDX3X UTR	0.00358922	DDX3X	KLK2 Flank	0.00355412	KLK2	HLA-A 58.0 Synonymous	0.00296573	HLA-A
49	PAX3 1877.0 Intron	0.00260516	PAX3	FAM135B 54.0 Non_Silent	0.00329804	FAM135B	ARID1A Intron	0.0024386	ARID1A	TCP1 UTR	0.00352274	TCP1	CDKN1A 0.0 Flank	0.00351148	CDKN1A	RET Synonymous	0.00294028	RET
50	CHST11 Intron	0.00249507	CHST11	RNF43 Non_Silent	0.00328766	RNF43	162780066-162780067-chr1-Intron-DEL-TC-TC--	0.00243095	DDR2	1027852-1027854-chr12-5'UTR-DEL-TTG-TTG--	0.00343132	ERC1	65503701-65503702-chr11-5'Flank-INS-----G	0.00341441	MALAT1	NRG1 Synonymous	0.00289441	NRG1
51	RGPD3 Non_Silent	0.0023772	RGPD3	PABPC1 Non_Silent	0.00328195	PABPC1	ITGAV Intron	0.00241261	ITGAV	PPARG UTR	0.00334149	PPARG	MUC1 Flank	0.00328534	MUC1	NOTCH2 Synonymous	0.00285931	NOTCH2
52	RUNX1T1 Non_Silent	0.00235596	RUNX1T1	ZFHX3 116.0 Non_Silent	0.00327872	ZFHX3	PTPRK 5401.0 Intron	0.00232143	PTPRK	40554659-40554659-chr17-3'UTR-SNP-A-A-G	0.00331635	CCR7	TNFRSF14 Flank	0.00325248	TNFRSF14	COL2A1 Synonymous	0.00277513	COL2A1
53	ABL2 Intron	0.0023168	ABL2	MYO5A Non_Silent	0.00308189	MYO5A	BRD4 586.0 Intron	0.00231726	BRD4	IL2 UTR	0.00329254	IL2	S100A7 Flank	0.00314283	S100A7	RANBP2 927.0 Synonymous	0.00276967	RANBP2
54	MYO5A 284.0 Non_Silent	0.002272	MYO5A	ALK Non_Silent	0.00303801	ALK	SDHA Intron	0.0022896	SDHA	XPC UTR	0.00323187	XPC	MYH1 0.0 Flank	0.00310816	MYH1	MGA 171.0 Synonymous	0.00274945	MGA
55	ERCC2 Non_Silent	0.00210541	ERCC2	TG Non_Silent	0.0028462	TG	BRD4 Intron	0.00228814	BRD4	FBLN2 UTR	0.00321454	FBLN2	YOD1 146.0 Flank	0.00306085	YOD1	KMT2D Synonymous	0.00272863	KMT2D
56	MUC16 1234.0 Non_Silent	0.00208815	MUC16	TP53 135.0 Non_Silent	0.00279581	TP53	152273673-152273673-chr7-Intron-SNP-G-G-A	0.00227729	KMT2C	117624128-117624128-chr1-3'UTR-SNP-A-A-G	0.00320822	FAM46C	MECOM Flank	0.003008	MECOM	MUC4 773.0 Synonymous	0.00269898	MUC4
57	ELF3 Intron	0.00205579	ELF3	CIITA 499.0 Non_Silent	0.0027929	CIITA	CIC Intron	0.0022647	CIC	157737393-157737393-chr2-3'UTR-SNP-C-C-T	0.00320195	ACVR1	PCM1 2143.0 Flank	0.00299972	PCM1	KMT2A Synonymous	0.00269013	KMT2A
58	ZFHX3 113.0 Non_Silent	0.00200019	ZFHX3	MUC16 1234.0 Non_Silent	0.00270567	MUC16	BCLAF1 Intron	0.00224428	BCLAF1	HOXC13 UTR	0.00309498	HOXC13	33010835-33010836-chr1-3'Flank-INS-----TTG	0.00295491	AK2	DDB2 Synonymous	0.00268588	DDB2
59	RMI2 Non_Silent	0.00199795	RMI2	RGPD3 1041.0 Non_Silent	0.0027005	RGPD3	SI Intron	0.0022078	SI	FOXP1 UTR	0.00308653	FOXP1	MDS2 0.0 Flank	0.00286684	MDS2	MAP3K13 Synonymous	0.00268479	MAP3K13
60	PIK3CA 1396.0 Non_Silent	0.00194815	PIK3CA	PRKAR1A Non_Silent	0.00269751	PRKAR1A	31181787-31181787-chr17-Splice_Site-SNP-T-T-G	0.00219345	NF1	COL1A1 UTR	0.00307311	COL1A1	BCL11A Flank	0.00280403	BCL11A	APOBEC3B 183.0 Synonymous	0.00268193	APOBEC3B
61	TP53 Non_Silent	0.00187132	TP53	7674220-7674220-chr17-Missense_Mutation-SNP-C-C-T	0.00264753	TP53	77445526-77445527-chr17-Intron-DEL-GT-GT--	0.00219124	SEPT9	BCL11A UTR	0.00304433	BCL11A	196045119-196045119-chr3-3'Flank-SNP-C-C-T	0.00273614	TFRC	LRP1B Synonymous	0.00264534	LRP1B
62	BRCA1 255.0 Intron	0.00180681	BRCA1	FGFR3 161.0 Non_Silent	0.00264344	FGFR3	TRAF7 Intron	0.00217848	TRAF7	48228635-48228635-chr4-5'UTR-SNP-T-T-C	0.00301928	TEC	U2 0.0 Flank	0.00270699	U2	SFRP4 Synonymous	0.00263075	SFRP4
63	GNAQ 4123.0 Non_Silent	0.00179745	GNAQ	FAT3 10616.0 Non_Silent	0.00263369	FAT3	50850593-50850594-chr10-Intron-DEL-TG-TG--	0.00216334	A1CF	HMGN2 UTR	0.00296854	HMGN2	DDX5 Flank	0.00269929	DDX5	HLA-A 46.0 Synonymous	0.00252879	HLA-A
64	DDX10 479.0 Non_Silent	0.00176494	DDX10	ATM Non_Silent	0.0026261	ATM	207564326-207564327-chr1-Intron-DEL-AC-AC--	0.00215967	CR1	TRIM2 2345.0 UTR	0.00296697	TRIM2	HOXD13 Flank	0.00265945	HOXD13	PICALM Synonymous	0.0025012	PICALM
65	SKI Intron	0.00169274	SKI	CHST1 Non_Silent	0.00255359	CHST1	41708668-41708669-chr8-Intron-DEL-AC-AC--	0.00215216	ANK1	LASP1 UTR	0.00294573	LASP1	ZNRF3 Flank	0.0026346	ZNRF3	FAT1 Synonymous	0.00249796	FAT1
66	ZFHX3 97.0 Non_Silent	0.0016566	ZFHX3	HOXA9 Non_Silent	0.0025362	HOXA9	ROBO2 Intron	0.00214276	ROBO2	NFIB UTR	0.00292511	NFIB	HSP90AA1 Flank	0.00257652	HSP90AA1	NUP98 Synonymous	0.00248483	NUP98
67	50188800-50188803-chr17-Splice_Region-DEL-AGAG-AGAG--	0.00163321	COL1A1	TP53 Non_Silent	0.00250098	TP53	RNF213 Intron	0.00211356	RNF213	FST UTR	0.00292388	FST	PIK3CB Flank	0.00253923	PIK3CB	149009712-149009712-chr1-Synonymous-SNP-A-A-G	0.00247142	PDE4DIP
68	CREBBP 272.0 Non_Silent	0.00162049	CREBBP	RP1 Non_Silent	0.0024592	RP1	RGS7 Intron	0.0020825	RGS7	BCL2 29.0 UTR	0.00291313	BCL2	TPM4 0.0 Flank	0.0025147	TPM4	FAT3 Synonymous	0.0024698	FAT3
69	EPHA7 365.0 Non_Silent	0.00161271	EPHA7	152177063-152177063-chr7-Frame_Shift_Del-DEL-T-T--	0.0024307	KMT2C	RAD51B Intron	0.00201772	RAD51B	JAZF1 UTR	0.00289945	JAZF1	CR1 Flank	0.00247484	CR1	RANBP2 639.0 Synonymous	0.00246879	RANBP2
70	PTPN6 82.0 Intron	0.00159675	PTPN6	NUMA1 Non_Silent	0.00229043	NUMA1	PREX2 Intron	0.00196315	PREX2	CHST1 UTR	0.00284343	CHST1	TERT 839.0 Flank	0.00246161	TERT	HOXA1 55.0 Synonymous	0.00244091	HOXA1
71	TP53 108.0 Non_Silent	0.00158082	TP53	MUC4 781.0 Non_Silent	0.00225309	MUC4	ZEB1 841.0 Intron	0.00194429	ZEB1	CCR7 18.0 UTR	0.00280754	CCR7	23627049-23627050-chr1-5'Flank-DEL-GA-GA--	0.00237483	MDS2	C7 Synonymous	0.00243484	C7
72	CNTNAP2 Intron	0.00155167	CNTNAP2	NFE2L2 Non_Silent	0.00216804	NFE2L2	CREB3L1 Intron	0.00191924	CREB3L1	GATA3 UTR	0.00276007	GATA3	MDS2 Flank	0.00235865	MDS2	HSP90AB1 Synonymous	0.00240811	HSP90AB1
73	HOXA9 Non_Silent	0.00154821	HOXA9	PIK3CA 1396.0 Non_Silent	0.00216494	PIK3CA	NF1 Intron	0.00190342	NF1	HLA-A 25.0 UTR	0.00271504	HLA-A	SLC34A2 Flank	0.00235409	SLC34A2	EBF1 Synonymous	0.00238597	EBF1
74	KMT2C Non_Silent	0.00154752	KMT2C	BRAF Non_Silent	0.0021381	BRAF	UBR5 Intron	0.00188131	UBR5	IL21R UTR	0.0027058	IL21R	10026288-10026288-chr3-5'Flank-SNP-C-C-T	0.00234955	FANCD2	ZFHX3 3494.0 Synonymous	0.00238549	ZFHX3
75	SI Intron	0.00152754	SI	ACVR2A 1482.0 Non_Silent	0.00209492	ACVR2A	ERBB4 Intron	0.00185886	ERBB4	HSP90AB1 UTR	0.0026995	HSP90AB1	MUC16 Flank	0.00231037	MUC16	RNF213 Synonymous	0.0023754	RNF213
76	PTPRK Intron	0.0015268	PTPRK	ABL1 981.0 Non_Silent	0.00204776	ABL1	HLA-A 57.0 Intron	0.00185027	HLA-A	CYLD UTR	0.00266984	CYLD	RDM1 Flank	0.00229386	RDM1	ATRX 72.0 Synonymous	0.00236025	ATRX
77	MUC16 Intron	0.00151707	MUC16	PRKAR1A 278.0 Non_Silent	0.00202968	PRKAR1A	BCLAF1 378.0 Intron	0.0018467	BCLAF1	125189745-125189747-chr9-5'UTR-DEL-GCG-GCG--	0.0026092	PPP6C	YOD1 Flank	0.00223334	YOD1	ZFHX3 Synonymous	0.00235498	ZFHX3
78	MUC16 Non_Silent	0.00148854	MUC16	FGFR3 211.0 Non_Silent	0.00202405	FGFR3	63532431-63532432-chr20-Intron-DEL-GT-GT--	0.00184131	PTK6	SDHA 767.0 UTR	0.00260783	SDHA	33010623-33010624-chr1-3'Flank-DEL-AC-AC--	0.0021754	AK2	BRCA2 348.0 Synonymous	0.0023422	BRCA2
79	GNAQ Non_Silent	0.00145961	GNAQ	APOB Non_Silent	0.00202235	APOB	CR1 Intron	0.00184123	CR1	RHO UTR	0.00257758	RHO	NUTM1 239.0 Flank	0.00216483	NUTM1	CLIP1 Synonymous	0.00234006	CLIP1
80	ATM Non_Silent	0.0014424	ATM	ROBO2 Non_Silent	0.00197385	ROBO2	SYK Intron	0.00183002	SYK	ELN UTR	0.0025077	ELN	WNK2 2668.0 Flank	0.00215147	WNK2	8886796-8886796-chr19-Synonymous-SNP-C-C-T	0.00230001	MUC16
81	PABPC1 Non_Silent	0.00144015	PABPC1	TNC Non_Silent	0.00196323	TNC	GNA11 489.0 Intron	0.00180329	GNA11	HLA-A 89.0 UTR	0.00250407	HLA-A	WT1 959.0 Flank	0.00213927	WT1	169116564-169116564-chr3-Synonymous-SNP-A-A-C	0.00228994	MECOM
82	ACVR1 Intron	0.00143965	ACVR1	ZFHX3 Non_Silent	0.00189798	ZFHX3	CLTC 930.0 Intron	0.00180314	CLTC	BCORL1 UTR	0.00248317	BCORL1	RGPD3 Flank	0.0021155	RGPD3	SF3B1 373.0 Synonymous	0.00227577	SF3B1
83	A1CF 67.0 Non_Silent	0.00143261	A1CF	CSMD3 Non_Silent	0.00188511	CSMD3	GAS7 Intron	0.00178758	GAS7	29942448-29942448-chr6-5'UTR-SNP-C-C-G	0.00247426	HLA-A	167826205-167826205-chr6-5'Flank-SNP-A-A-C	0.00210346	MLLT4	NUTM2A Synonymous	0.00227525	NUTM2A
84	CIITA 499.0 Non_Silent	0.00142826	CIITA	NRAS 189.0 Non_Silent	0.00188058	NRAS	CHD2 Intron	0.00177687	CHD2	AXIN1 UTR	0.00245806	AXIN1	STK11 0.0 Flank	0.00204659	STK11	8896017-8896017-chr19-Synonymous-SNP-A-A-T	0.00227339	MUC16
85	NF1 Non_Silent	0.00142792	NF1	FBXW7 Non_Silent	0.00185636	FBXW7	LASP1 Intron	0.00177214	LASP1	TFE3 UTR	0.00241885	TFE3	33010841-33010841-chr1-3'Flank-SNP-A-A-G	0.00200997	AK2	TRIM2 2346.0 Synonymous	0.00226378	TRIM2
86	BCL6 Intron	0.00140142	BCL6	EPHA7 Non_Silent	0.00184945	EPHA7	MUC16 1157.0 Intron	0.00176106	MUC16	FANCF UTR	0.00241584	FANCF	TRAF7 0.0 Flank	0.0020025	TRAF7	FANCA Synonymous	0.00226108	FANCA
87	36293373-36293375-chr22-In_Frame_Del-DEL-CCT-CCT--	0.00138317	MYH9	TSC1 Non_Silent	0.00182427	TSC1	43057017-43057017-chr17-Intron-SNP-T-T-G	0.00175999	BRCA1	153270364-153270364-chr4-5'UTR-SNP-C-C-A	0.0023656	TRIM2	106470618-106470618-chr2-5'Flank-SNP-C-C-G	0.00197445	RGPD3	134050425-134050425-chr9-Synonymous-SNP-A-A-G	0.00222466	BRD3
88	CACNA1D Intron	0.00138192	CACNA1D	GNAQ 4123.0 Non_Silent	0.00179415	GNAQ	113145994-113145994-chr10-Intron-SNP-G-G-T	0.00175494	TCF7L2	CACNA1D UTR	0.00235404	CACNA1D	110633978-110633978-chr2-3'Flank-SNP-T-T-C	0.00196193	BUB1	NBEA Synonymous	0.0021888	NBEA
89	SND1 Intron	0.00138051	SND1	NUP214 Non_Silent	0.00174606	NUP214	NUP214 Intron	0.0017237	NUP214	RBM15 UTR	0.00232392	RBM15	FAT3 0.0 Flank	0.00196059	FAT3	ERBB2 Synonymous	0.00215967	ERBB2
90	PAX3 Intron	0.00137343	PAX3	POLG Non_Silent	0.00171886	POLG	FUBP1 Intron	0.00171373	FUBP1	108201855-108201855-chr8-3'UTR-DEL-T-T--	0.00231277	EIF3E	CRTC3 Flank	0.00194217	CRTC3	KMT2C 2605.0 Synonymous	0.00215071	KMT2C
91	SDHB 184.0 Intron	0.0013682	SDHB	SALL4 Non_Silent	0.001663	SALL4	C6 Intron	0.00170934	C6	MUC16 UTR	0.00228984	MUC16	APOBEC3B 0.0 Flank	0.0019194	APOBEC3B	BTK Synonymous	0.0021371	BTK
92	FANCD2 Intron	0.00132097	FANCD2	USP8 Non_Silent	0.0016209	USP8	PDE4D 611.0 Intron	0.00170793	PDE4D	P2RY8 UTR	0.00228399	P2RY8	NR4A3 Flank	0.00191281	NR4A3	KMT2C 2606.0 Synonymous	0.00209233	KMT2C
93	KMT2C 2775.0 Intron	0.00131539	KMT2C	8910505-8910505-chr19-Missense_Mutation-SNP-A-A-G	0.00161941	MUC16	PTK6 89.0 Intron	0.00168558	PTK6	CDH10 UTR	0.00227932	CDH10	DCAF12L2 Flank	0.00189071	DCAF12L2	CTNNA2 Synonymous	0.00208531	CTNNA2
94	ASXL2 Non_Silent	0.00130547	ASXL2	NF1 5282.0 Non_Silent	0.00161446	NF1	KMT2C 1900.0 Intron	0.00167269	KMT2C	KDM5A UTR	0.00226998	KDM5A	TNF Flank	0.00189067	TNF	MUC4 792.0 Synonymous	0.00206508	MUC4
95	ACVR2A 1482.0 Non_Silent	0.00130514	ACVR2A	25799435-25799437-chr2-In_Frame_Del-DEL-CTG-CTG--	0.00159983	ASXL2	PCM1 Intron	0.0016656	PCM1	WT1 UTR	0.00219082	WT1	PPP2R1A Flank	0.00188949	PPP2R1A	ROBO2 10363.0 Synonymous	0.00204406	ROBO2
96	FAM135B Intron	0.00130346	FAM135B	AKAP9 Non_Silent	0.00159666	AKAP9	PABPC1 127.0 Intron	0.0016587	PABPC1	DICER1 UTR	0.00218603	DICER1	50400882-50400882-chr12-5'Flank-SNP-A-A-G	0.00188079	LARP4	RP1 Synonymous	0.00203834	RP1
97	HLA-A Non_Silent	0.00130287	HLA-A	ZFHX3 97.0 Non_Silent	0.0015792	ZFHX3	TCF3 Intron	0.00165658	TCF3	NPM1 UTR	0.00217887	NPM1	KDM6A Flank	0.00187856	KDM6A	CDX2 Synonymous	0.0020304	CDX2
98	POLE Intron	0.00128084	POLE	NUP98 Non_Silent	0.00157827	NUP98	ABL2 Intron	0.001646	ABL2	HLA-A 86.0 UTR	0.00217446	HLA-A	92352231-92352231-chr11-5'Flank-SNP-G-G-C	0.00187792	FAT3	AFF4 436.0 Synonymous	0.00199949	AFF4
99	SEPT6 Intron	0.00127907	SEPT6	HRAS Non_Silent	0.00156935	HRAS	101360022-101360023-chrX-Intron-DEL-AT-AT--	0.0016352	BTK	ZNF429 UTR	0.00213619	ZNF429	SDC4 Flank	0.00187741	SDC4	HLA-A 34.0 Synonymous	0.00199471	HLA-A
100	ZMYM3 Intron	0.00126783	ZMYM3	C6 Non_Silent	0.00156255	C6	ALDH2 Intron	0.00162173	ALDH2	LPP UTR	0.00212178	LPP	RLF Flank	0.00186182	RLF	PTPRK Synonymous	0.00197865	PTPRK
101	CHD4 22.0 Intron	0.00125929	CHD4	FAT4 1973.0 Non_Silent	0.00154703	FAT4	ACSL6 Intron	0.00161956	ACSL6	RMI2 UTR	0.00211304	RMI2	ARNT Flank	0.00182081	ARNT	NOTCH1 Synonymous	0.0019686	NOTCH1
102	TG Non_Silent	0.0012538	TG	36293373-36293375-chr22-In_Frame_Del-DEL-CCT-CCT--	0.001533	MYH9	PBRM1 Intron	0.00161468	PBRM1	AR UTR	0.00208735	AR	33010834-33010835-chr1-3'Flank-INS-----TT	0.00176111	AK2	152235823-152235823-chr7-Synonymous-SNP-T-T-C	0.00195456	KMT2C
103	MUC16 Synonymous	0.00124604	MUC16	CHD4 Non_Silent	0.00153098	CHD4	MYH9 Intron	0.00158833	MYH9	7740410-7740410-chr19-3'UTR-SNP-G-G-T	0.00206926	CD209	WWP2 0.0 Flank	0.00169784	WWP2	PICALM 838.0 Synonymous	0.00192767	PICALM
104	RNF213 Intron	0.00122803	RNF213	PSD Non_Silent	0.00148918	PSD	68529886-68529887-chr17-Intron-INS-----TGTT	0.00158703	PRKAR1A	HMGN2 56.0 UTR	0.00203155	HMGN2	9763013-9763015-chr16-3'Flank-DEL-CAA-CAA--	0.00169778	GRIN2A	STIL Synonymous	0.00192647	STIL
105	PDE4D Intron	0.00122561	PDE4D	BCORL1 Non_Silent	0.00148247	BCORL1	ZNF521 Intron	0.00157276	ZNF521	RPL10 UTR	0.00200976	RPL10	CA4 Flank	0.00169192	CA4	ARNT 72.0 Synonymous	0.00192501	ARNT
106	IRS4 Non_Silent	0.00121756	IRS4	SDHA Non_Silent	0.00146741	SDHA	A1CF Intron	0.00156987	A1CF	26780773-26780773-chr1-3'UTR-DEL-C-C--	0.0019891	ARID1A	ERCC4 Flank	0.00167131	ERCC4	TG Synonymous	0.00188575	TG
107	RNF213 Non_Silent	0.00120267	RNF213	RBM10 526.0 Non_Silent	0.00143811	RBM10	TPR Intron	0.00156233	TPR	EZR UTR	0.00198205	EZR	NUTM1 0.0 Flank	0.00167099	NUTM1	POU5F1 Synonymous	0.00188024	POU5F1
108	BCL9L 187.0 Intron	0.00119355	BCL9L	RNF213 Non_Silent	0.00142868	RNF213	UBR5 688.0 Intron	0.00155067	UBR5	BARD1 UTR	0.00197666	BARD1	31575254-31575254-chr6-5'Flank-SNP-G-G-A	0.00165726	TNF	CUX1 Synonymous	0.00186672	CUX1
109	PLAG1 Non_Silent	0.00119138	PLAG1	KMT2A Non_Silent	0.00142657	KMT2A	LRP1 Intron	0.00153014	LRP1	SFRP4 UTR	0.0019765	SFRP4	SLC34A2 460.0 Flank	0.00165652	SLC34A2	MUC16 944.0 Synonymous	0.00185273	MUC16
110	FAT4 Intron	0.00116122	FAT4	72788665-72788667-chr16-In_Frame_Del-DEL-TGC-TGC--	0.00142122	ZFHX3	RET Intron	0.00152722	RET	LRP1B UTR	0.00195412	LRP1B	HLA-A Flank	0.00163006	HLA-A	64192840-64192840-chrX-Synonymous-SNP-T-T-C	0.0018506	AMER1
111	NUP214 Non_Silent	0.0011499	NUP214	UBR5 Non_Silent	0.00141885	UBR5	NF1 1738.0 Intron	0.00152055	NF1	CARS UTR	0.00189904	CARS	ZNF521 Flank	0.00161058	ZNF521	SF3B1 Synonymous	0.00184335	SF3B1
112	POLE Non_Silent	0.00113376	POLE	MSH6 409.0 Non_Silent	0.0014082	MSH6	KMT2C 2780.0 Intron	0.00150793	KMT2C	GAS7 UTR	0.00188615	GAS7	71366258-71366258-chrX-5'Flank-SNP-T-T-G	0.00159516	TAF1	6581704-6581704-chr12-Synonymous-SNP-T-T-G	0.00184268	CHD4
113	BRAF Non_Silent	0.00110853	BRAF	108917908-108917910-chr11-In_Frame_Del-DEL-TGA-TGA--	0.00138647	DDX10	8896139-8896139-chr19-Intron-SNP-T-T-A	0.00149812	MUC16	KNSTRN UTR	0.00187626	KNSTRN	HIST1H3B 10.0 Flank	0.00159283	HIST1H3B	UBR5 705.0 Synonymous	0.0018345	UBR5
114	SFRP4 33.0 Synonymous	0.00110822	SFRP4	ERBB2 Non_Silent	0.00133043	ERBB2	SRGAP3 Intron	0.00149603	SRGAP3	EBF1 UTR	0.00187576	EBF1	F7 Flank	0.00159279	F7	8960747-8960747-chr19-Synonymous-SNP-T-T-G	0.00181779	MUC16
115	CDH10 Non_Silent	0.00110368	CDH10	POLE Non_Silent	0.00131977	POLE	CACNA1D Intron	0.00149437	CACNA1D	TET1 UTR	0.00187164	TET1	PBRM1 2636.0 Flank	0.00158481	PBRM1	KMT2C 2077.0 Synonymous	0.00181396	KMT2C
116	FGFR4 Intron	0.00110358	FGFR4	TRRAP 1966.0 Non_Silent	0.00130496	TRRAP	EPS15 Intron	0.00149213	EPS15	EIF1AX UTR	0.00182301	EIF1AX	10026015-10026015-chr3-5'Flank-SNP-T-T-G	0.0015836	FANCD2	RECQL Synonymous	0.00180976	RECQL
117	ARID1A Intron	0.00110286	ARID1A	CDH10 Non_Silent	0.00129681	CDH10	NF1 5084.0 Intron	0.00145123	NF1	PRRX1 UTR	0.00181361	PRRX1	SRC Flank	0.00155759	SRC	CSMD3 Synonymous	0.00177038	CSMD3
118	PTPRB Intron	0.00110179	PTPRB	FAT3 Non_Silent	0.00129322	FAT3	FHIT Intron	0.00142907	FHIT	SDHC 1025.0 UTR	0.00181286	SDHC	FLCN 500.0 Flank	0.00154575	FLCN	152265172-152265172-chr7-Synonymous-SNP-C-C-T	0.00176108	KMT2C
119	KMT2C Synonymous	0.00110026	KMT2C	CACNA1D Non_Silent	0.00127604	CACNA1D	COL2A1 Intron	0.00142711	COL2A1	78031299-78031299-chr9-5'UTR-SNP-C-C-T	0.00180799	GNAQ	EIF3E Flank	0.00154528	EIF3E	152273712-152273712-chr7-Synonymous-SNP-A-A-T	0.00175759	KMT2C
120	FBXW7 Non_Silent	0.00108794	FBXW7	A1CF 67.0 Non_Silent	0.00127339	A1CF	TRIM3 Intron	0.00139348	TRIM3	AFF3 121.0 UTR	0.00180776	AFF3	MYH11 Flank	0.00154336	MYH11	8886841-8886841-chr19-Synonymous-SNP-C-C-T	0.00175641	MUC16
121	NRAS 189.0 Non_Silent	0.00105846	NRAS	33013299-33013299-chr1-Missense_Mutation-SNP-T-T-A	0.00126293	AK2	SEPT5 Intron	0.00138063	SEPT5	PPARG 2.0 UTR	0.00180299	PPARG	33010752-33010752-chr1-3'Flank-SNP-C-C-T	0.00152148	AK2	MUC4 797.0 Synonymous	0.00174056	MUC4
122	NFE2L2 Non_Silent	0.00105446	NFE2L2	SIRPA 412.0 Non_Silent	0.00125954	SIRPA	TSHR Intron	0.00137462	TSHR	SDC4 UTR	0.00179585	SDC4	3069057-3069059-chr1-5'Flank-DEL-GGC-GGC--	0.00149745	PRDM16	86000684-86000684-chr11-Synonymous-SNP-T-T-G	0.00173608	PICALM
123	KMT2A Non_Silent	0.00104813	KMT2A	GNAQ Non_Silent	0.00125752	GNAQ	C3 Intron	0.00137356	C3	FCRL4 UTR	0.00179541	FCRL4	190179690-190179690-chr4-3'Flank-SNP-G-G-A	0.00149302	DUX4	MUC4 686.0 Synonymous	0.00173526	MUC4
124	ACSL6 Intron	0.00104358	ACSL6	2924307-2924309-chr7-In_Frame_Del-DEL-GGA-GGA--	0.00125222	CARD11	152265028-152265028-chr7-Intron-SNP-G-G-T	0.00136437	KMT2C	AFF4 UTR	0.00178227	AFF4	CD209 Flank	0.00147386	CD209	87228798-87228798-chr10-Synonymous-SNP-C-C-T	0.00173496	NUTM2A
125	MUC16 2239.0 Synonymous	0.00103648	MUC16	162776162-162776162-chr1-Missense_Mutation-SNP-C-C-A	0.00124609	DDR2	MUC4 Intron	0.00135863	MUC4	MAF UTR	0.00177294	MAF	AXIN1 0.0 Flank	0.00145779	AXIN1	MUC16 2573.0 Synonymous	0.00173269	MUC16
126	RP1 Non_Silent	0.00102423	RP1	CDK12 Non_Silent	0.00123672	CDK12	FAT4 Intron	0.00135469	FAT4	F2 UTR	0.0017634	F2	60452807-60452807-chr2-3'Flank-SNP-T-T-C	0.00142568	BCL11A	CSF3R 157.0 Synonymous	0.00171616	CSF3R
127	LPP Intron	0.00101004	LPP	CHD4 611.0 Non_Silent	0.00122713	CHD4	ALK Intron	0.00134881	ALK	BCL11A 1922.0 UTR	0.00175303	BCL11A	ZNF384 0.0 Flank	0.00141684	ZNF384	SPEN 1800.0 Synonymous	0.00171335	SPEN
128	SDHA Intron	0.00100268	SDHA	ANK1 Non_Silent	0.00122507	ANK1	CNBD1 Intron	0.00134087	CNBD1	FBL UTR	0.00174892	FBL	33010702-33010702-chr1-3'Flank-SNP-G-G-C	0.00139289	AK2	UBR5 Synonymous	0.00170305	UBR5
129	PTCH1 Intron	0.000999911	PTCH1	MYH9 242.0 Non_Silent	0.00119998	MYH9	CDC73 Intron	0.00132904	CDC73	DCT UTR	0.00174408	DCT	159790389-159790389-chr6-5'Flank-SNP-A-A-G	0.00139148	TCP1	BCR 2688.0 Synonymous	0.00168784	BCR
130	CHD7 Non_Silent	0.000999066	CHD7	AK2 Non_Silent	0.00117558	AK2	118903196-118903197-chr11-Intron-DEL-AG-AG--	0.00130578	BCL9L	FLI1 UTR	0.00173531	FLI1	ARHGEF1 697.0 Flank	0.0013752	ARHGEF1	PPP2R1A Synonymous	0.00168539	PPP2R1A
131	FAT3 10616.0 Non_Silent	0.000984887	FAT3	SIRPA Non_Silent	0.00117186	SIRPA	FANCC Intron	0.00128894	FANCC	FOXO3 UTR	0.00173151	FOXO3	ZNF479 Flank	0.00137237	ZNF479	29942858-29942858-chr6-Synonymous-SNP-C-C-A	0.00168098	HLA-A
132	8910513-8910513-chr19-Splice_Region-SNP-A-A-G	0.000957283	MUC16	PABPC1 136.0 Non_Silent	0.00116405	PABPC1	PABPC1 Intron	0.0012834	PABPC1	CR1 1.0 UTR	0.00172615	CR1	PAX7 Flank	0.00136388	PAX7	NUTM2A 68.0 Synonymous	0.00167581	NUTM2A
133	HLA-A Intron	0.000944698	HLA-A	MGA Non_Silent	0.00116248	MGA	XPO1 Intron	0.00128	XPO1	HLF UTR	0.00171699	HLF	RPL10 81.0 Flank	0.00135711	RPL10	CIC Synonymous	0.00164743	CIC
134	RB1 Intron	0.000927199	RB1	PABPC1 132.0 Non_Silent	0.00115953	PABPC1	MUC16 1234.0 Intron	0.00127738	MUC16	DRG1 UTR	0.00171003	DRG1	MDM2 0.0 Flank	0.00132149	MDM2	KMT2C 2603.0 Synonymous	0.00164719	KMT2C
135	RGS7 Intron	0.000926177	RGS7	MED12 Non_Silent	0.00114906	MED12	KDM5A Intron	0.00127352	KDM5A	HOXA13 UTR	0.00170559	HOXA13	MED1 0.0 Flank	0.00131402	MED1	TRIM2 Synonymous	0.0016366	TRIM2
136	ERBB4 Intron	0.000919751	ERBB4	NFKBIE Non_Silent	0.00114833	NFKBIE	TERT Intron	0.00125249	TERT	BCORL1 453.0 UTR	0.00170481	BCORL1	NCOR1 3729.0 Flank	0.00130588	NCOR1	MUC16 759.0 Synonymous	0.00163377	MUC16
137	HRAS Non_Silent	0.000919512	HRAS	CIC Non_Silent	0.00114276	CIC	QKI Intron	0.00124602	QKI	CRTC3 UTR	0.00169155	CRTC3	MB Flank	0.00129443	MB	PDE4DIP Synonymous	0.00162764	PDE4DIP
138	FGFR3 211.0 Non_Silent	0.000916282	FGFR3	BCOR Non_Silent	0.00113404	BCOR	114716209-114716209-chr1-Intron-SNP-C-C-G	0.00124264	NRAS	CANT1 UTR	0.00167242	CANT1	WWTR1 Flank	0.00128734	WWTR1	MUC4 796.0 Synonymous	0.00160578	MUC4
139	63532431-63532432-chr20-Intron-DEL-GT-GT--	0.000912811	PTK6	PDE4DIP Non_Silent	0.00111963	PDE4DIP	EGFR Intron	0.00123923	EGFR	SPECC1 UTR	0.00164621	SPECC1	WWTR1 2759.0 Flank	0.00125838	WWTR1	NUP98 1131.0 Synonymous	0.00160463	NUP98
140	ALDH2 Intron	0.000899101	ALDH2	100709223-100709223-chr8-Missense_Mutation-SNP-T-T-A	0.00111525	PABPC1	MECOM 868.0 Intron	0.00123829	MECOM	CHST11 UTR	0.00164012	CHST11	TPM4 Flank	0.00122233	TPM4	MUC16 2314.0 Synonymous	0.00159969	MUC16
141	FANCA Non_Silent	0.00089026	FANCA	IL21R Non_Silent	0.00110571	IL21R	KMT2A Intron	0.00123487	KMT2A	SF1 UTR	0.00163577	SF1	33010638-33010638-chr1-3'Flank-SNP-T-T-C	0.00120563	AK2	150813259-150813259-chr1-Synonymous-SNP-G-G-C	0.00158715	ARNT
142	ZFHX3 116.0 Non_Silent	0.000881712	ZFHX3	TEC Non_Silent	0.00110101	TEC	ROBO2 11139.0 Intron	0.00123155	ROBO2	OMD UTR	0.00161756	OMD	33010835-33010836-chr1-3'Flank-INS-----TTGGA	0.0011901	AK2	FLT4 Synonymous	0.00157108	FLT4
143	147918575-147918575-chr2-Missense_Mutation-SNP-A-A-C	0.000865794	ACVR2A	27163673-27163673-chr7-Missense_Mutation-SNP-A-A-C	0.00109563	HOXA9	ACVR1 Intron	0.001227	ACVR1	ERCC5 UTR	0.00160086	ERCC5	PRPF40B 0.0 Flank	0.00117975	PRPF40B	TMPRSS2 Synonymous	0.00156792	TMPRSS2
144	7674220-7674220-chr17-Missense_Mutation-SNP-C-C-T	0.000863545	TP53	SPEN Non_Silent	0.00108662	SPEN	FANCD2 425.0 Intron	0.00122229	FANCD2	7766594-7766595-chr1-3'UTR-DEL-CA-CA--	0.00159841	CAMTA1	33010786-33010786-chr1-3'Flank-SNP-C-C-T	0.00117815	AK2	NUP98 1937.0 Synonymous	0.00156708	NUP98
145	ERCC2 Intron	0.000858295	ERCC2	PTEN Non_Silent	0.00108542	PTEN	NCOR2 Intron	0.0012204	NCOR2	EIF4A2 UTR	0.00157595	EIF4A2	CALR 119.0 Flank	0.00117538	CALR	FANCD2 Synonymous	0.00155615	FANCD2
146	PRKAR1A Non_Silent	0.000855537	PRKAR1A	SDHA 366.0 Non_Silent	0.00108493	SDHA	TRAF7 362.0 Intron	0.00121622	TRAF7	RUNX1 UTR	0.00156041	RUNX1	RGS7 Flank	0.00115194	RGS7	MECOM 637.0 Synonymous	0.00155392	MECOM
147	256277-256277-chr5-Intron-SNP-A-A-T	0.000853305	SDHA	USP8 1368.0 Non_Silent	0.00108368	USP8	MYH11 Intron	0.0012058	MYH11	TP63 UTR	0.00155856	TP63	PMS2 Flank	0.00115184	PMS2	KMT2C 2264.0 Synonymous	0.00155254	KMT2C
148	C6 Intron	0.000852022	C6	PRDM2 Non_Silent	0.00107974	PRDM2	MTOR Intron	0.00120016	MTOR	SPOP UTR	0.00155247	SPOP	RPL10 Flank	0.00114684	RPL10	195785472-195785472-chr3-Synonymous-SNP-G-G-A	0.00155203	MUC4
149	FANCD2 425.0 Intron	0.000846318	FANCD2	SRGAP3 Non_Silent	0.00107734	SRGAP3	PML Intron	0.0011974	PML	ATP1A1 UTR	0.00153666	ATP1A1	CCR7 Flank	0.00114449	CCR7	MGA Synonymous	0.00154577	MGA
150	PSD 40.0 Non_Silent	0.000841482	PSD	DDR2 Non_Silent	0.00107585	DDR2	ERBB2 Intron	0.00119268	ERBB2	PAX3 32.0 UTR	0.00153462	PAX3	POLQ 2293.0 Flank	0.00113576	POLQ	AKAP9 Synonymous	0.00152926	AKAP9
151	CHST1 Non_Silent	0.00083674	CHST1	RAF1 Non_Silent	0.00106587	RAF1	VAV1 Intron	0.00118572	VAV1	PSIP1 UTR	0.00152916	PSIP1	65501009-65501011-chr11-3'Flank-DEL-TTT-TTT--	0.00110211	MALAT1	8886745-8886745-chr19-Synonymous-SNP-A-A-C	0.00152834	MUC16
152	FUS Intron	0.000833858	FUS	TP53 117.0 Non_Silent	0.0010627	TP53	CTNNA2 Intron	0.00117138	CTNNA2	ZNRF3 UTR	0.00152834	ZNRF3	TFRC Flank	0.00109333	TFRC	CHD4 233.0 Synonymous	0.00150012	CHD4
153	152273673-152273673-chr7-Intron-SNP-G-G-A	0.000831589	KMT2C	147918575-147918575-chr2-Missense_Mutation-SNP-A-A-C	0.00106106	ACVR2A	50188800-50188803-chr17-Splice_Region-DEL-AGAG-AGAG--	0.00116647	COL1A1	DCT 62.0 UTR	0.00152037	DCT	ZNF384 Flank	0.00109245	ZNF384	152265184-152265184-chr7-Synonymous-SNP-C-C-T	0.0014576	KMT2C
154	50850593-50850594-chr10-Intron-DEL-TG-TG--	0.000829751	A1CF	ZFHX3 292.0 Non_Silent	0.00105787	ZFHX3	PAX3 Intron	0.00115783	PAX3	256463-256463-chr5-3'UTR-SNP-T-T-C	0.00150466	SDHA	U2 5.0 Flank	0.00109093	U2	USP6 138.0 Synonymous	0.00144236	USP6
155	TSC1 Non_Silent	0.000820483	TSC1	HLA-A 58.0 Non_Silent	0.00105035	HLA-A	PTPRB Intron	0.00115533	PTPRB	CAMTA1 4.0 UTR	0.00150264	CAMTA1	ARHGEF1 487.0 Flank	0.00108699	ARHGEF1	FAT3 10616.0 Synonymous	0.00144073	FAT3
156	ALK Intron	0.000815794	ALK	KMT2C 2606.0 Non_Silent	0.00104455	KMT2C	RBM10 Intron	0.00115508	RBM10	SDHA 764.0 UTR	0.00149379	SDHA	MUTYH Flank	0.00108504	MUTYH	TET1 Synonymous	0.00143783	TET1
157	MUC16 1234.0 Intron	0.000815346	MUC16	LRP1 Non_Silent	0.00104427	LRP1	CASC5 Intron	0.00115238	CASC5	PDE4DIP UTR	0.00148706	PDE4DIP	69757648-69757648-chr16-5'Flank-SNP-G-G-C	0.00107635	WWP2	HOXA1 Synonymous	0.00142513	HOXA1
158	RBM10 526.0 Non_Silent	0.000808139	RBM10	STK11 Non_Silent	0.00103079	STK11	PDE4DIP Intron	0.00115069	PDE4DIP	PPP6C 864.0 UTR	0.00147712	PPP6C	190179634-190179634-chr4-3'Flank-SNP-G-G-T	0.00106384	DUX4	HLA-A 59.0 Synonymous	0.00141724	HLA-A
159	ZFHX3 Non_Silent	0.000807005	ZFHX3	RGPD3 404.0 Non_Silent	0.00102841	RGPD3	TSC2 Intron	0.00114744	TSC2	SEPT9 UTR	0.00146939	SEPT9	ACSL6 0.0 Flank	0.00104369	ACSL6	F2 404.0 Synonymous	0.00140579	F2
160	FANCD2 403.0 Intron	0.000806575	FANCD2	BCLAF1 Non_Silent	0.00102783	BCLAF1	PARG 1336.0 Intron	0.00113992	PARG	MLLT6 UTR	0.00146767	MLLT6	BUB1 0.0 Flank	0.00103518	BUB1	MUC4 838.0 Synonymous	0.00138788	MUC4
161	SALL4 Non_Silent	0.000805845	SALL4	CACNA1D 3436.0 Non_Silent	0.001022	CACNA1D	MUC16 1306.0 Intron	0.00113795	MUC16	FOXP1 90.0 UTR	0.00146767	FOXP1	33010542-33010542-chr1-3'Flank-SNP-G-G-A	0.00102827	AK2	BRD3 Synonymous	0.00137788	BRD3
162	TP53 134.0 Non_Silent	0.000804323	TP53	JAK1 Non_Silent	0.00100883	JAK1	152273610-152273610-chr7-Intron-SNP-A-A-T	0.00112917	KMT2C	29945529-29945529-chr6-3'UTR-SNP-C-C-A	0.0014472	HLA-A	ARC Flank	0.0010123	ARC	SMAD3 Synonymous	0.0013762	SMAD3
163	ITGAV Intron	0.000803661	ITGAV	MLLT1 Non_Silent	0.000999807	MLLT1	CBLB Intron	0.00112704	CBLB	FANCA 21.0 UTR	0.00144141	FANCA	AK1 Flank	0.00100729	AK1	ATP2B3 881.0 Synonymous	0.00137245	ATP2B3
164	TAF1 Intron	0.000802253	TAF1	FIP1L1 1509.0 Non_Silent	0.000987302	FIP1L1	ECT2 Intron	0.00112628	ECT2	68226629-68226629-chr5-5'UTR-SNP-C-C-A	0.00143809	PIK3R1	GNAS 0.0 Flank	0.000992487	GNAS	29944168-29944168-chr6-Synonymous-SNP-G-G-A	0.00137219	HLA-A
165	SDHA 366.0 Non_Silent	0.000791644	SDHA	PABPC1 42.0 Non_Silent	0.000986554	PABPC1	KDM6A Intron	0.00112505	KDM6A	AKT3 UTR	0.00143608	AKT3	33010784-33010784-chr1-3'Flank-SNP-C-C-G	0.000980908	AK2	APOB Synonymous	0.00136911	APOB
166	NRG1 Intron	0.000790969	NRG1	DDX10 Non_Silent	0.000974397	DDX10	BCL6 Intron	0.00112496	BCL6	RBM10 UTR	0.00142811	RBM10	NACA Flank	0.000978345	NACA	RECQL4 Synonymous	0.00136901	RECQL4
167	50809907-50809909-chr10-In_Frame_Del-DEL-AGC-AGC--	0.000789213	A1CF	MUC16 2133.0 Non_Silent	0.000971517	MUC16	8896136-8896137-chr19-Intron-INS-----T	0.00111026	MUC16	243843242-243843244-chr1-5'UTR-DEL-CTG-CTG--	0.00142651	AKT3	CDKN1A Flank	0.000952045	CDKN1A	MN1 Synonymous	0.00136876	MN1
168	TNC Non_Silent	0.000787332	TNC	CIITA Non_Silent	0.000953949	CIITA	ZEB1 Intron	0.00110873	ZEB1	CYP2C8 UTR	0.00140798	CYP2C8	CUL3 Flank	0.000935286	CUL3	MITF Synonymous	0.0013652	MITF
169	HSP90AB1 Intron	0.000782366	HSP90AB1	CHD7 Non_Silent	0.000951026	CHD7	APOB Intron	0.00110744	APOB	29942497-29942497-chr6-5'UTR-SNP-G-G-C	0.00137945	HLA-A	33012985-33012988-chr1-3'Flank-DEL-CACA-CACA--	0.000931049	AK2	HLA-A 63.0 Synonymous	0.00134763	HLA-A
170	CRTC1 Intron	0.00078206	CRTC1	CREBBP Non_Silent	0.000946391	CREBBP	JAZF1 Intron	0.00110402	JAZF1	AFF3 UTR	0.00137559	AFF3	ATIC Flank	0.000925004	ATIC	KMT2C 2265.0 Synonymous	0.00134404	KMT2C
171	AK2 0.0 Flank	0.000772549	AK2	KMT2D 291.0 Non_Silent	0.000945524	KMT2D	BRCA1 Intron	0.00110305	BRCA1	DGCR8 UTR	0.00135805	DGCR8	NUTM2A Flank	0.000924941	NUTM2A	FANCD2 460.0 Synonymous	0.00131484	FANCD2
172	CSF1R Intron	0.000771809	CSF1R	ASXL2 1314.0 Non_Silent	0.000944923	ASXL2	149030046-149030046-chr1-Intron-SNP-G-G-A	0.00110229	PDE4DIP	170572293-170572293-chr6-3'UTR-SNP-A-A-C	0.00135061	TBP	XPA Flank	0.000924157	XPA	LRIG3 Synonymous	0.00131363	LRIG3
173	138132688-138132688-chr8-Missense_Mutation-SNP-T-T-G	0.000764017	FAM135B	SI Non_Silent	0.000944508	SI	ANK1 Intron	0.00109316	ANK1	256558-256558-chr5-3'UTR-SNP-T-T-C	0.0013429	SDHA	201286716-201286716-chr2-3'Flank-SNP-G-G-C	0.000923385	CASP8	NCOR2 Synonymous	0.00130985	NCOR2
174	CARD11 Intron	0.000758964	CARD11	DDX10 479.0 Non_Silent	0.000943937	DDX10	8910514-8910515-chr19-Splice_Region-INS-----AGCGGT	0.00108353	MUC16	RSPO2 UTR	0.00133681	RSPO2	CEBPA Flank	0.000917702	CEBPA	CACNA1D Synonymous	0.00130876	CACNA1D
175	ERBB3 Intron	0.000756641	ERBB3	CCND1 Non_Silent	0.000939853	CCND1	FAT3 Intron	0.00108264	FAT3	FGFR2 UTR	0.00132987	FGFR2	92352033-92352033-chr11-5'Flank-SNP-C-C-T	0.000906695	FAT3	CREBBP Synonymous	0.00129975	CREBBP
176	TRRAP Intron	0.000753595	TRRAP	DDR2 2874.0 Non_Silent	0.000934685	DDR2	KMT2C 2775.0 Intron	0.00108211	KMT2C	ABL2 UTR	0.00132607	ABL2	BCL6 Flank	0.00090256	BCL6	21491541-21491541-chr12-Synonymous-SNP-T-T-G	0.00129544	RECQL
177	GLI1 Non_Silent	0.000749889	GLI1	FKBP9 347.0 Non_Silent	0.000928855	FKBP9	ZFHX3 Intron	0.00106915	ZFHX3	GPC3 UTR	0.00131872	GPC3	33010834-33010835-chr1-3'Flank-INS-----TTTGGAGAAGGCTGCTAGGG	0.000897474	AK2	EN1 Synonymous	0.00129303	EN1
178	MYH9 242.0 Non_Silent	0.000744288	MYH9	ABL1 Non_Silent	0.000914287	ABL1	CARD11 793.0 Intron	0.00106857	CARD11	CAMTA1 UTR	0.00130406	CAMTA1	190179905-190179905-chr4-3'Flank-SNP-A-A-G	0.000886675	DUX4	USP6 Synonymous	0.00128961	USP6
179	NSD1 Intron	0.000734288	NSD1	99828334-99828336-chr9-In_Frame_Del-DEL-CAC-CAC--	0.00091352	NR4A3	SMARCA4 Intron	0.00106754	SMARCA4	PDE4D UTR	0.00130348	PDE4D	KDM5A Flank	0.000878615	KDM5A	FOXO3 Synonymous	0.00127931	FOXO3
180	HLA-A 57.0 Intron	0.000721957	HLA-A	MTOR Non_Silent	0.000909434	MTOR	TFG Intron	0.00106619	TFG	ERBB4 UTR	0.00127942	ERBB4	161658898-161658898-chr1-5'Flank-SNP-C-C-A	0.00087421	FCGR2B	KDM6A Synonymous	0.00127565	KDM6A
181	APOB Non_Silent	0.00072062	APOB	BCORL1 1468.0 Non_Silent	0.000902126	BCORL1	SETD2 Intron	0.00106574	SETD2	STRN UTR	0.00127934	STRN	BUB1 Flank	0.000870616	BUB1	122328157-122328157-chr12-Synonymous-SNP-C-C-T	0.00127126	CLIP1
182	FOXP1 Intron	0.000712109	FOXP1	CLIP1 Non_Silent	0.00089043	CLIP1	POLE Intron	0.00106496	POLE	222201035-222201036-chr2-3'UTR-DEL-AC-AC--	0.00127795	PAX3	167826131-167826131-chr6-5'Flank-SNP-T-T-C	0.000866743	MLLT4	PREX2 Synonymous	0.00125854	PREX2
183	TP53 135.0 Non_Silent	0.000711504	TP53	SPOP Non_Silent	0.000884781	SPOP	PTPRT Intron	0.00106459	PTPRT	BCL2L12 UTR	0.00126372	BCL2L12	GRIN2A Flank	0.000866036	GRIN2A	SFRP4 33.0 Synonymous	0.0012542	SFRP4
184	NF1 2823.0 Intron	0.000710496	NF1	SLC34A2 Non_Silent	0.000874595	SLC34A2	RGPD3 Intron	0.00106101	RGPD3	HIP1 96.0 UTR	0.00124975	HIP1	FAT4 Flank	0.0008547	FAT4	MUC16 2080.0 Synonymous	0.0012458	MUC16
185	CACNA1D 3436.0 Non_Silent	0.000706256	CACNA1D	FANCA Non_Silent	0.000870093	FANCA	HLA-A 78.0 Intron	0.00106075	HLA-A	SMC1A UTR	0.00120878	SMC1A	CLIP1 0.0 Flank	0.000854453	CLIP1	ARC 47.0 Synonymous	0.00124435	ARC
186	PAX5 Intron	0.000701318	PAX5	BCR Non_Silent	0.000858784	BCR	TNN Intron	0.00105696	TNN	HSP90AB1 134.0 UTR	0.00120648	HSP90AB1	CASP8 Flank	0.000836621	CASP8	PTCH1 Synonymous	0.00123423	PTCH1
187	MET 1945.0 Intron	0.000690912	MET	NOTCH2 Non_Silent	0.000856864	NOTCH2	CHD7 Intron	0.00104647	CHD7	31605307-31605307-chr20-5'UTR-SNP-T-T-C	0.00119102	ID1	CLIP1 Flank	0.0008181	CLIP1	108765822-108765822-chr2-Synonymous-SNP-A-A-C	0.00123331	RANBP2
188	NIN Intron	0.000685343	NIN	CHD2 Non_Silent	0.000852901	CHD2	KAT6B 3247.0 Intron	0.00104309	KAT6B	PRRX1 4.0 UTR	0.00118749	PRRX1	HLA-A 94.0 Flank	0.000812168	HLA-A	29944135-29944135-chr6-Synonymous-SNP-A-A-G	0.00122973	HLA-A
189	RNF43 Non_Silent	0.000680974	RNF43	ZFHX3 3499.0 Non_Silent	0.0008483	ZFHX3	ATM Intron	0.00104261	ATM	LSM1 UTR	0.00117845	LSM1	SEPT5 179.0 Flank	0.000810583	SEPT5	BIRC6 1650.0 Synonymous	0.00122794	BIRC6
190	APOB Intron	0.000679811	APOB	152265180-152265180-chr7-Missense_Mutation-SNP-C-C-T	0.00084231	KMT2C	KMT2C 2776.0 Intron	0.00103724	KMT2C	CHIC2 UTR	0.00117448	CHIC2	FANCD2 Flank	0.00080683	FANCD2	AK2 7.0 Synonymous	0.00122749	AK2
191	FKBP9 347.0 Non_Silent	0.000678055	FKBP9	FAT1 Non_Silent	0.000834981	FAT1	ARHGEF12 Intron	0.0010372	ARHGEF12	YWHAE 1119.0 UTR	0.00117113	YWHAE	FAM47C Flank	0.000805118	FAM47C	8886823-8886823-chr19-Synonymous-SNP-G-G-A	0.00122711	MUC16
192	EZH2 Intron	0.00067631	EZH2	WNK2 Non_Silent	0.000833296	WNK2	FLNA Intron	0.00103568	FLNA	BRD4 UTR	0.00116432	BRD4	CD209 152.0 Flank	0.00079755	CD209	BIRC6 Synonymous	0.00121096	BIRC6
193	EPHA7 Non_Silent	0.000673538	EPHA7	PABPC1 126.0 Non_Silent	0.000831976	PABPC1	PTPN11 Intron	0.00103094	PTPN11	ASXL2 UTR	0.00116023	ASXL2	13920091-13920091-chr16-5'Flank-SNP-G-G-T	0.000787779	ERCC4	KMT2D 165.0 Synonymous	0.00120862	KMT2D
194	10046539-10046539-chr3-Intron-SNP-T-T-G	0.000673068	FANCD2	SPEN 1674.0 Non_Silent	0.000830684	SPEN	CNTRL Intron	0.0010269	CNTRL	RIN2 UTR	0.00115107	RIN2	ATIC 760.0 Flank	0.000782568	ATIC	RBM10 Synonymous	0.00120848	RBM10
195	TG 4567.0 Intron	0.00067283	TG	TRIM3 Non_Silent	0.000829242	TRIM3	MNX1 Intron	0.00102505	MNX1	33026754-33026755-chr21-5'UTR-DEL-CT-CT--	0.00115096	OLIG2	18033750-18033750-chr8-3'Flank-SNP-C-C-T	0.000777596	PCM1	LIFR Synonymous	0.00119958	LIFR
196	MSH6 Intron	0.000671833	MSH6	NRAS Non_Silent	0.000828072	NRAS	APOB 562.0 Intron	0.00102395	APOB	TRIM3 UTR	0.00114096	TRIM3	HIP1 Flank	0.000768663	HIP1	CNTNAP2 Synonymous	0.00119932	CNTNAP2
197	C6 Non_Silent	0.000661505	C6	MUC16 945.0 Non_Silent	0.000821494	MUC16	NACA 150.0 Intron	0.00101734	NACA	EML4 UTR	0.00112911	EML4	RPL10 0.0 Flank	0.000766553	RPL10	RBM15 Synonymous	0.00119595	RBM15
198	ARID1B 8588.0 Non_Silent	0.00066101	ARID1B	XPC Non_Silent	0.000819347	XPC	TCF12 Intron	0.00101652	TCF12	MAFB UTR	0.00112785	MAFB	176099576-176099576-chr2-3'Flank-SNP-C-C-A	0.000764326	HOXD13	AMER1 155.0 Synonymous	0.00119487	AMER1
199	CTNND2 Intron	0.000651746	CTNND2	MAML2 Non_Silent	0.000815771	MAML2	CSF1R Intron	0.00101546	CSF1R	EPHA3 UTR	0.00112225	EPHA3	36674409-36674409-chr6-5'Flank-SNP-T-T-G	0.000761109	CDKN1A	CBFA2T3 Synonymous	0.00119421	CBFA2T3
200	152265180-152265180-chr7-Missense_Mutation-SNP-C-C-T	0.000645078	KMT2C	FAM47C Non_Silent	0.000810416	FAM47C	68632505-68632505-chr10-Intron-SNP-C-C-G	0.00101445	TET1	TSHR UTR	0.001114	TSHR	36673769-36673769-chr6-5'Flank-SNP-C-C-A	0.00076066	CDKN1A	CHD4 Synonymous	0.00119395	CHD4
201	21974721-21974721-chr9-Missense_Mutation-SNP-G-G-C	0.000644424	CDKN2A	DDX10 5058.0 Non_Silent	0.000803031	DDX10	NIN Intron	0.00101408	NIN	89738596-89738596-chr16-3'UTR-SNP-T-T-G	0.00110531	FANCA	29949896-29949896-chr6-3'Flank-SNP-G-G-A	0.000757438	HLA-A	F12 Synonymous	0.00119352	F12
202	FIP1L1 1509.0 Non_Silent	0.000643389	FIP1L1	29942916-29942916-chr6-Missense_Mutation-SNP-A-A-G	0.000800941	HLA-A	ITK Intron	0.00101103	ITK	75538110-75538110-chr7-3'UTR-SNP-A-A-G	0.00110273	HIP1	HOXA11 Flank	0.000749508	HOXA11	ZNF384 Synonymous	0.00118995	ZNF384
203	72788665-72788667-chr16-In_Frame_Del-DEL-TGC-TGC--	0.000641786	ZFHX3	KAT6A Non_Silent	0.000797546	KAT6A	NUTM2A 71.0 Intron	0.00100917	NUTM2A	BCL9L 89.0 UTR	0.00110052	BCL9L	190179926-190179926-chr4-3'Flank-SNP-T-T-G	0.00074831	DUX4	SDHA 366.0 Synonymous	0.00118595	SDHA
204	QKI Intron	0.000640593	QKI	100709671-100709671-chr8-Nonsense_Mutation-SNP-C-C-A	0.000796948	PABPC1	KIF5B 536.0 Intron	0.00100765	KIF5B	29945517-29945517-chr6-3'UTR-SNP-G-G-C	0.00109523	HLA-A	16076004-16076005-chr19-5'Flank-DEL-CC-CC--	0.000746334	TPM4	HSP90AB1 130.0 Synonymous	0.00118086	HSP90AB1
205	TSC2 Intron	0.00063934	TSC2	AK2 5.0 Non_Silent	0.000796179	AK2	10047700-10047700-chr3-Intron-SNP-A-A-G	0.00100473	FANCD2	EIF3E UTR	0.00107875	EIF3E	190177951-190177951-chr4-3'Flank-SNP-G-G-T	0.000746017	DUX4	PER1 66.0 Synonymous	0.00117972	PER1
206	ALK Non_Silent	0.000638857	ALK	1915338-1915338-chr20-Missense_Mutation-SNP-C-C-A	0.000792902	SIRPA	NDRG1 Intron	0.000999115	NDRG1	SSX1 UTR	0.0010737	SSX1	AFF3 Flank	0.000717965	AFF3	CUL3 Synonymous	0.00117887	CUL3
207	COL2A1 Intron	0.000638433	COL2A1	RGPD3 561.0 Non_Silent	0.000791705	RGPD3	POLQ Intron	0.000995717	POLQ	ERBB3 446.0 UTR	0.00106672	ERBB3	PTK6 Flank	0.00071751	PTK6	8141859-8141859-chr17-Synonymous-SNP-A-A-C	0.00117463	PER1
208	148828714-148828714-chr7-Intron-SNP-C-C-A	0.000630914	EZH2	NOTCH1 Non_Silent	0.000791254	NOTCH1	MUC16 1175.0 Intron	0.000991516	MUC16	MYCN UTR	0.00106573	MYCN	PTPN6 0.0 Flank	0.000717338	PTPN6	STAG2 Synonymous	0.00115087	STAG2
209	PTK6 Intron	0.000630566	PTK6	ALK 656.0 Non_Silent	0.000789504	ALK	STAG2 Intron	0.000990925	STAG2	SDHA 766.0 UTR	0.00106188	SDHA	240771537-240771537-chr1-3'Flank-SNP-C-C-T	0.000709894	RGS7	LRP1 Synonymous	0.00115014	LRP1
210	MUC16 946.0 Intron	0.000629989	MUC16	KMT2C 2019.0 Non_Silent	0.000776946	KMT2C	TF Intron	0.000989101	TF	BCL9L UTR	0.00105864	BCL9L	HOXD13 62.0 Flank	0.000709546	HOXD13	AMER1 Synonymous	0.00114487	AMER1
211	USP6 Intron	0.000627371	USP6	COL1A1 69.0 Non_Silent	0.00077588	COL1A1	10046838-10046838-chr3-Intron-SNP-G-G-A	0.000986664	FANCD2	IL21R 946.0 UTR	0.00105701	IL21R	33010837-33010839-chr1-3'Flank-DEL-AAA-AAA--	0.000708681	AK2	152238746-152238746-chr7-Synonymous-SNP-G-G-A	0.00113933	KMT2C
212	SRGAP3 Synonymous	0.000625319	SRGAP3	HOXA1 55.0 Non_Silent	0.000775253	HOXA1	HLA-A 50.0 Intron	0.000985008	HLA-A	MGA UTR	0.00105188	MGA	EGFR 3852.0 Flank	0.000698752	EGFR	MUC16 2151.0 Synonymous	0.00112165	MUC16
213	HR Non_Silent	0.000624971	HR	BUB1 Non_Silent	0.000770663	BUB1	TAF1 Intron	0.000982633	TAF1	SP1 UTR	0.00103787	SP1	ACSL6 Flank	0.000698249	ACSL6	29944132-29944132-chr6-Synonymous-SNP-G-G-A	0.00111685	HLA-A
214	ACVR2A Intron	0.0006193	ACVR2A	MYC 48.0 Non_Silent	0.000767918	MYC	NBEA Intron	0.00097669	NBEA	6785518-6785520-chr1-5'UTR-DEL-GAG-GAG--	0.00103733	CAMTA1	WWP2 Flank	0.000690261	WWP2	CHD7 Synonymous	0.00110916	CHD7
215	NDRG1 Intron	0.000618047	NDRG1	CARS Non_Silent	0.000766622	CARS	HSP90AB1 35.0 Intron	0.000975721	HSP90AB1	TRIM27 UTR	0.00103681	TRIM27	1203761-1203763-chr19-5'Flank-DEL-GAG-GAG--	0.000689165	STK11	ELN 408.0 Synonymous	0.00110844	ELN
216	134050431-134050431-chr9-Synonymous-SNP-T-T-G	0.000617606	BRD3	DEK Non_Silent	0.000764112	DEK	SEPT6 Intron	0.000967115	SEPT6	F3 UTR	0.00103217	F3	8051222-8051222-chr10-5'Flank-SNP-T-T-C	0.000685459	GATA3	PRKACA Synonymous	0.00110708	PRKACA
217	ASPSCR1 Intron	0.000606408	ASPSCR1	PAX8 Non_Silent	0.000759133	PAX8	PC Intron	0.000966068	PC	SLC45A3 UTR	0.00103006	SLC45A3	7747650-7747650-chr19-5'Flank-SNP-A-A-G	0.00068037	CD209	RLF Synonymous	0.00110457	RLF
218	STK11 Non_Silent	0.000605351	STK11	TNN Non_Silent	0.000757944	TNN	BIRC6 Intron	0.000959063	BIRC6	CCND2 UTR	0.00102958	CCND2	ID1 26.0 Flank	0.000675404	ID1	CHEK2 163.0 Synonymous	0.00110358	CHEK2
219	XPC 667.0 Non_Silent	0.000604864	XPC	TNC 1118.0 Non_Silent	0.000754162	TNC	6952191-6952191-chr12-Intron-SNP-A-A-C	0.00095578	PTPN6	GK UTR	0.00102806	GK	ACVR1 Flank	0.000671523	ACVR1	CRTC1 Synonymous	0.00110332	CRTC1
220	TCF3 Intron	0.000604158	TCF3	CNTRL Non_Silent	0.000753234	CNTRL	10048222-10048222-chr3-Intron-SNP-C-C-A	0.00095493	FANCD2	SIRPA UTR	0.00101921	SIRPA	SF3B1 908.0 Flank	0.000671312	SF3B1	CAMTA1 Synonymous	0.00109113	CAMTA1
221	PCM1 Intron	0.000598046	PCM1	GK Non_Silent	0.000752948	GK	ERCC2 Intron	0.000954036	ERCC2	FGFR4 UTR	0.0010121	FGFR4	MLF1 Flank	0.000669017	MLF1	38986063-38986063-chr22-Synonymous-SNP-A-A-G	0.00108844	APOBEC3B
222	HRAS Intron	0.000596977	HRAS	100709481-100709481-chr8-Missense_Mutation-SNP-T-T-A	0.000741074	PABPC1	CR1 1364.0 Intron	0.000951353	CR1	58974631-58974632-chr5-3'UTR-DEL-AA-AA--	0.00101153	PDE4D	118981427-118981427-chr11-3'Flank-SNP-C-C-T	0.000649241	FOXR1	108751415-108751415-chr2-Synonymous-SNP-A-A-G	0.00108136	RANBP2
223	AFF3 9233.0 Intron	0.000593612	AFF3	CNTNAP2 Non_Silent	0.000736135	CNTNAP2	CYLD Intron	0.000946847	CYLD	F12 3.0 UTR	0.00100297	F12	35916339-35916339-chr17-3'Flank-SNP-T-T-C	0.000648685	RDM1	HSP90AB1 60.0 Synonymous	0.00108108	HSP90AB1
224	NF1 5282.0 Non_Silent	0.000592851	NF1	72788520-72788520-chr16-Missense_Mutation-SNP-T-T-G	0.000736107	ZFHX3	CAMTA1 Intron	0.00094671	CAMTA1	MED1 UTR	0.000999506	MED1	50400872-50400872-chr12-5'Flank-SNP-A-A-G	0.000641146	LARP4	TRRAP Synonymous	0.00107191	TRRAP
225	XPO1 Synonymous	0.000590458	XPO1	130884103-130884105-chr9-In_Frame_Del-DEL-AAG-AAG--	0.000731538	ABL1	ANK1 1109.0 Intron	0.000941573	ANK1	TNF UTR	0.00099522	TNF	FBLN2 0.0 Flank	0.000641067	FBLN2	PF4 Synonymous	0.00105505	PF4
226	PTPRK Non_Silent	0.000589634	PTPRK	ATRX Non_Silent	0.0007315	ATRX	ATR Intron	0.000940458	ATR	18777397-18777397-chr19-3'UTR-SNP-A-A-C	0.000984536	CRTC1	106470842-106470842-chr2-5'Flank-SNP-C-C-T	0.000634717	RGPD3	TBX3 Synonymous	0.00105267	TBX3
227	8910509-8910509-chr19-Splice_Site-SNP-C-C-A	0.000587966	MUC16	PABPC1 252.0 Non_Silent	0.000730173	PABPC1	FLT4 Intron	0.000937068	FLT4	CD79B UTR	0.00098009	CD79B	MECOM 1240.0 Flank	0.000632332	MECOM	HLA-A 45.0 Synonymous	0.00104888	HLA-A
228	ETV1 Intron	0.000586323	ETV1	50809907-50809909-chr10-In_Frame_Del-DEL-AGC-AGC--	0.000728156	A1CF	PDGFB Intron	0.000934326	PDGFB	EPHA7 UTR	0.000979861	EPHA7	KDM6A 0.0 Flank	0.000631598	KDM6A	PRPF40B Synonymous	0.00104604	PRPF40B
229	KMT2A Synonymous	0.000585231	KMT2A	NR4A3 Non_Silent	0.000726099	NR4A3	256277-256277-chr5-Intron-SNP-A-A-T	0.000931523	SDHA	AKT2 UTR	0.000973799	AKT2	35915193-35915193-chr17-3'Flank-SNP-A-A-G	0.000629569	RDM1	USP8 1370.0 Synonymous	0.00104462	USP8
230	KAT6A Non_Silent	0.000581726	KAT6A	52321433-52321433-chr15-Missense_Mutation-SNP-A-A-C	0.00072261	MYO5A	CTNND2 Intron	0.000929948	CTNND2	AKT3 6871.0 UTR	0.00097229	AKT3	MYH1 Flank	0.000628165	MYH1	FAM135B Synonymous	0.00103794	FAM135B
231	ABL1 1006.0 Non_Silent	0.000580518	ABL1	122328150-122328150-chr12-Missense_Mutation-SNP-C-C-T	0.00072096	CLIP1	PDE4D 146.0 Intron	0.000929279	PDE4D	RHOH UTR	0.000966828	RHOH	TERT Flank	0.000621271	TERT	MNX1 Synonymous	0.00103614	MNX1
232	256477-256477-chr5-3'UTR-SNP-T-T-C	0.000580307	SDHA	ARID1B Non_Silent	0.000720371	ARID1B	TBL1X Intron	0.000928295	TBL1X	27692991-27692991-chr12-3'UTR-SNP-C-C-T	0.000963492	PPFIBP1	KLK2 0.0 Flank	0.000619072	KLK2	KMT2C 2018.0 Synonymous	0.00102426	KMT2C
233	CARD11 792.0 Intron	0.000580143	CARD11	NFATC2 Non_Silent	0.000719544	NFATC2	NOTCH1 Intron	0.00092658	NOTCH1	ARID1A UTR	0.000958887	ARID1A	71366263-71366263-chrX-5'Flank-SNP-T-T-G	0.000616377	TAF1	BCOR Synonymous	0.00102343	BCOR
234	8910505-8910505-chr19-Missense_Mutation-SNP-A-A-G	0.000579505	MUC16	AXIN2 Non_Silent	0.000718478	AXIN2	PTPRT 13977.0 Intron	0.000926493	PTPRT	CD2 UTR	0.000954053	CD2	B2M Flank	0.000616037	B2M	STAG1 Synonymous	0.00101703	STAG1
235	NUP214 Intron	0.000579077	NUP214	CARD11 364.0 Non_Silent	0.000716405	CARD11	PTCH1 1302.0 Intron	0.000921329	PTCH1	CARD11 UTR	0.000952978	CARD11	SEPT5 Flank	0.000615861	SEPT5	195784815-195784815-chr3-Synonymous-SNP-G-G-T	0.00101324	MUC4
236	43057017-43057017-chr17-Intron-SNP-T-T-G	0.000577488	BRCA1	MUC16 760.0 Non_Silent	0.000704241	MUC16	FES Intron	0.000916473	FES	F5 UTR	0.000951857	F5	ANK1 Flank	0.000614832	ANK1	ACVR2A 1481.0 Synonymous	0.0010119	ACVR2A
237	CAMTA1 19626.0 UTR	0.000571733	CAMTA1	KMT2C 2266.0 Non_Silent	0.000702889	KMT2C	TG 4567.0 Intron	0.000915102	TG	PDCD1 UTR	0.000949193	PDCD1	ARHGEF1 Flank	0.000607819	ARHGEF1	152265043-152265043-chr7-Synonymous-SNP-G-G-A	0.0010068	KMT2C
238	2924307-2924309-chr7-In_Frame_Del-DEL-GGA-GGA--	0.000571008	CARD11	FAT4 Non_Silent	0.000702723	FAT4	FKBP9 361.0 Intron	0.000914839	FKBP9	SMC1A 970.0 UTR	0.000942985	SMC1A	ARC 70.0 Flank	0.000601962	ARC	236538-236538-chr5-Synonymous-SNP-C-C-A	0.00100448	SDHA
239	8907564-8907565-chr19-Intron-DEL-GT-GT--	0.000570425	MUC16	BCL6 Non_Silent	0.000699447	BCL6	DDX1 Intron	0.000911136	DDX1	222201299-222201299-chr2-3'UTR-DEL-C-C--	0.000937189	PAX3	CLP1 Flank	0.000600239	CLP1	BCR Synonymous	0.00100244	BCR
240	MED12 Non_Silent	0.000568695	MED12	PTPRT Non_Silent	0.000698155	PTPRT	CAMTA1 13649.0 Intron	0.000908626	CAMTA1	FUS UTR	0.000936849	FUS	196045341-196045341-chr3-3'Flank-SNP-A-A-G	0.000600019	TFRC	ALK 560.0 Synonymous	0.00100061	ALK
241	ZBTB16 Intron	0.000567088	ZBTB16	236534-236534-chr5-Missense_Mutation-SNP-C-C-T	0.000695704	SDHA	BRD4 182.0 Intron	0.000903392	BRD4	HLA-A 87.0 UTR	0.000928715	HLA-A	CSF3R Flank	0.0005981	CSF3R	8943575-8943575-chr19-Synonymous-SNP-C-C-G	0.000996027	MUC16
242	TCL1A Intron	0.000567048	TCL1A	LPP Non_Silent	0.000694632	LPP	TRRAP Intron	0.000903368	TRRAP	TLX1 UTR	0.000925322	TLX1	CD74 Flank	0.000585625	CD74	FGFR4 Synonymous	0.000987757	FGFR4
243	BCOR Synonymous	0.000565409	BCOR	PTPRB Non_Silent	0.000693608	PTPRB	ALK 100.0 Intron	0.000902715	ALK	HOXA9 22.0 UTR	0.000913891	HOXA9	FBL 241.0 Flank	0.000583977	FBL	MYH11 Synonymous	0.000978549	MYH11
244	C7 Intron	0.000564163	C7	HSP90AB1 Non_Silent	0.000688094	HSP90AB1	RCC2 Intron	0.0008996	RCC2	EGF UTR	0.000912647	EGF	159790409-159790409-chr6-5'Flank-SNP-T-T-C	0.000580171	TCP1	3771839-3771839-chr11-Synonymous-SNP-A-A-G	0.000969476	NUP98
245	FAT3 Non_Silent	0.000560472	FAT3	152265209-152265209-chr7-Missense_Mutation-SNP-G-G-A	0.000683391	KMT2C	PDGFB 352.0 Intron	0.000898678	PDGFB	NFE2 UTR	0.00089699	NFE2	CRTC3 2256.0 Flank	0.000577241	CRTC3	102288240-102288240-chr8-Synonymous-SNP-T-T-C	0.000968154	UBR5
246	PTEN Non_Silent	0.000560417	PTEN	195788578-195788578-chr3-Missense_Mutation-SNP-A-A-T	0.000681914	MUC4	AKAP9 Intron	0.000898493	AKAP9	STAT3 UTR	0.000888547	STAT3	IK 0.0 Flank	0.000573638	IK	CASC5 Synonymous	0.00096411	CASC5
247	CSMD3 Non_Silent	0.000560167	CSMD3	CIC 141.0 Non_Silent	0.000681791	CIC	FCGR2B Intron	0.000894433	FCGR2B	AK2 UTR	0.000877679	AK2	65501902-65501902-chr11-3'Flank-SNP-T-T-G	0.000570608	MALAT1	AK3 Synonymous	0.000958179	AK3
248	BCL9L Intron	0.00055954	BCL9L	PSD 40.0 Non_Silent	0.000681197	PSD	FAH Intron	0.000892795	FAH	CDC73 UTR	0.000872136	CDC73	SS18L1 Flank	0.000570316	SS18L1	FAT1 664.0 Synonymous	0.000955773	FAT1
249	NF1 Intron	0.000553729	NF1	102084824-102084826-chr14-In_Frame_Del-DEL-TCT-TCT--	0.000668735	HSP90AA1	ASXL1 Intron	0.000891311	ASXL1	NFKBIE UTR	0.000871333	NFKBIE	CDC73 Flank	0.000559759	CDC73	152248082-152248082-chr7-Synonymous-SNP-G-G-T	0.000944081	KMT2C
250	BCR Intron	0.000552482	BCR	FANCD2 769.0 Non_Silent	0.000667819	FANCD2	29944102-29944102-chr6-Intron-SNP-T-T-G	0.000882581	HLA-A	HLA-A 24.0 UTR	0.000870444	HLA-A	NCOR2 Flank	0.000556669	NCOR2	CHEK2 Synonymous	0.000940872	CHEK2
251	KMT2C 2776.0 Synonymous	0.000549661	KMT2C	SGK1 Non_Silent	0.000665479	SGK1	EZR Intron	0.000875391	EZR	41745775-41745777-chr4-3'UTR-DEL-CGC-CGC--	0.000869103	PHOX2B	TG Flank	0.000556573	TG	HIC2 Synonymous	0.000940619	HIC2
252	222293706-222293707-chr2-Intron-DEL-CT-CT--	0.000547568	PAX3	ARID1A 1554.0 Non_Silent	0.000664435	ARID1A	LCP1 Intron	0.00087273	LCP1	ABL1 UTR	0.000866257	ABL1	31399504-31399504-chr22-5'Flank-SNP-T-T-G	0.000555767	DRG1	BRD3 403.0 Synonymous	0.000937884	BRD3
253	ZEB1 Intron	0.000547027	ZEB1	KIAA1549 Non_Silent	0.00066413	KIAA1549	ZBTB16 Intron	0.000871906	ZBTB16	UBP1 996.0 UTR	0.000866239	UBP1	ZNRF3 3479.0 Flank	0.000539577	ZNRF3	GPC3 Synonymous	0.000936934	GPC3
254	27163673-27163673-chr7-Missense_Mutation-SNP-A-A-C	0.000542409	HOXA9	CHD4 640.0 Non_Silent	0.000663363	CHD4	CLIP1 Intron	0.000862585	CLIP1	58891707-58891709-chr20-5'UTR-DEL-CCG-CCG--	0.000865531	GNAS	36674625-36674625-chr6-5'Flank-SNP-C-C-T	0.000521623	CDKN1A	SRC Synonymous	0.000935646	SRC
255	DDR2 2874.0 Non_Silent	0.000540046	DDR2	NCOR1 Non_Silent	0.000663098	NCOR1	TRIP11 684.0 Intron	0.000856761	TRIP11	MYC 10.0 UTR	0.000863937	MYC	USP6 Flank	0.000520359	USP6	NT5C2 Synonymous	0.000916963	NT5C2
256	AXIN2 Non_Silent	0.000539115	AXIN2	HOXA1 Non_Silent	0.000661628	HOXA1	CHD4 Intron	0.000853204	CHD4	MECOM UTR	0.000859289	MECOM	33323048-33323048-chr6-5'Flank-SNP-A-A-G	0.000515146	DAXX	100713099-100713099-chr8-Synonymous-SNP-T-T-C	0.00091062	PABPC1
257	HLA-A Synonymous	0.000537728	HLA-A	138132688-138132688-chr8-Missense_Mutation-SNP-T-T-G	0.000658515	FAM135B	50188800-50188801-chr17-Splice_Region-DEL-AG-AG--	0.000847097	COL1A1	TBX3 UTR	0.000856061	TBX3	STK11 Flank	0.000512301	STK11	SDHA 764.0 Synonymous	0.00090632	SDHA
258	PLAG1 116.0 Non_Silent	0.00053754	PLAG1	NCOA1 Non_Silent	0.000653096	NCOA1	AFF4 Intron	0.000838674	AFF4	ARID1A 1696.0 UTR	0.000853391	ARID1A	65501214-65501214-chr11-3'Flank-SNP-A-A-G	0.00051205	MALAT1	152248130-152248130-chr7-Synonymous-SNP-T-T-C	0.000902228	KMT2C
259	DDR2 Intron	0.000537325	DDR2	KMT2C 2603.0 Non_Silent	0.000648884	KMT2C	BCR Intron	0.000835108	BCR	44253648-44253648-chr6-3'UTR-DEL-G-G--	0.000847111	HSP90AB1	MUC1 143.0 Flank	0.000511696	MUC1	256399-256399-chr5-Synonymous-SNP-G-G-C	0.000892742	SDHA
260	PBX1 Intron	0.000529879	PBX1	CARD11 Non_Silent	0.000648079	CARD11	FGFR1 Intron	0.000832386	FGFR1	TNFRSF14 UTR	0.000845512	TNFRSF14	CNOT3 Flank	0.000509699	CNOT3	F5 Synonymous	0.000889845	F5
261	PDE4DIP 2810.0 Intron	0.000524276	PDE4DIP	KEAP1 Non_Silent	0.000647754	KEAP1	HSP90AA1 Intron	0.000830457	HSP90AA1	PIK3R1 UTR	0.00084022	PIK3R1	NKX2-1 Flank	0.000505881	NKX2-1	SGK1 Synonymous	0.000884993	SGK1
262	FAT1 Intron	0.000523072	FAT1	ETV1 Non_Silent	0.000639383	ETV1	ZEB1 840.0 Intron	0.000829746	ZEB1	TBP UTR	0.000838004	TBP	21538140-21538140-chr19-3'Flank-SNP-G-G-A	0.000501439	ZNF429	FUS Synonymous	0.000881927	FUS
263	SDHA Non_Silent	0.000522201	SDHA	SETBP1 Non_Silent	0.000636894	SETBP1	45893388-45893389-chr12-Intron-DEL-TC-TC--	0.000827534	ARID2	MYOD1 4.0 UTR	0.000837581	MYOD1	CIC Flank	0.000499867	CIC	SH3GL1 Synonymous	0.000881827	SH3GL1
264	STAT5B 167.0 Intron	0.000522006	STAT5B	KDM5C Non_Silent	0.000634192	KDM5C	FAT1 Intron	0.000816635	FAT1	140662375-140662375-chr5-3'UTR-SNP-T-T-G	0.000833251	IK	DNM2 Flank	0.000494223	DNM2	153270400-153270400-chr4-Synonymous-SNP-C-C-A	0.000879985	TRIM2
265	PREX2 Intron	0.000520928	PREX2	CBL 1453.0 Non_Silent	0.000633957	CBL	PDGFRB 75.0 Intron	0.000815881	PDGFRB	202010968-202010968-chr1-5'UTR-DEL-T-T--	0.00082996	ELF3	SUFU Flank	0.00049155	SUFU	FOXP1 Synonymous	0.000878309	FOXP1
266	KL Intron	0.000520453	KL	1915406-1915408-chr20-In_Frame_Del-DEL-CGA-CGA--	0.000633276	SIRPA	CARD11 792.0 Intron	0.000815377	CARD11	HOXA13 115.0 UTR	0.000828993	HOXA13	ZBTB16 Flank	0.000484718	ZBTB16	BCL9 Synonymous	0.000876481	BCL9
267	33013299-33013299-chr1-Missense_Mutation-SNP-T-T-A	0.000517973	AK2	CHST1 35.0 Non_Silent	0.000632363	CHST1	AKT1 Intron	0.000813756	AKT1	CAMTA1 19626.0 UTR	0.000828486	CAMTA1	35917049-35917049-chr17-3'Flank-SNP-G-G-T	0.0004746	RDM1	APOBEC3B 72.0 Synonymous	0.000875608	APOBEC3B
268	CHD4 611.0 Non_Silent	0.000517792	CHD4	FGFR1 Non_Silent	0.000630922	FGFR1	C7 Intron	0.00081299	C7	EP300 UTR	0.000821478	EP300	190179679-190179679-chr4-3'Flank-SNP-G-G-T	0.000471975	DUX4	TF 172.0 Synonymous	0.000870398	TF
269	SLC34A2 Non_Silent	0.000515944	SLC34A2	DEK 800.0 Non_Silent	0.000630658	DEK	SEPT9 Intron	0.000804812	SEPT9	JUN UTR	0.000821073	JUN	DCAF12L2 30.0 Flank	0.000468713	DCAF12L2	TNN Synonymous	0.000867512	TNN
270	LEF1 Intron	0.000514834	LEF1	CDK1 Non_Silent	0.000627156	CDK1	TCF7L2 Intron	0.00080291	TCF7L2	RAD51 UTR	0.000820354	RAD51	33010835-33010836-chr1-3'Flank-INS-----TTGGAGAAGGCTGCTAG	0.000468645	AK2	MKL1 Synonymous	0.000867212	MKL1
271	33013271-33013271-chr1-Synonymous-SNP-G-G-A	0.000512953	AK2	GRIN2A Non_Silent	0.000618329	GRIN2A	FLT3 1179.0 Intron	0.000802249	FLT3	DCTN1 UTR	0.000813294	DCTN1	10023460-10023460-chr3-5'Flank-SNP-G-G-A	0.000461177	FANCD2	MED12 Synonymous	0.000867175	MED12
272	AK2 5.0 Synonymous	0.000509184	AK2	15931506-15931506-chr1-Missense_Mutation-SNP-A-A-C	0.000616905	SPEN	COL3A1 Intron	0.000801297	COL3A1	HOXA9 UTR	0.000808796	HOXA9	CEBPA 0.0 Flank	0.000460469	CEBPA	SALL4 Synonymous	0.000866028	SALL4
273	KAT6B 3247.0 Intron	0.00050876	KAT6B	PABPC1 54.0 Non_Silent	0.000603981	PABPC1	CUX1 Intron	0.000799869	CUX1	MT3 UTR	0.000807387	MT3	TH Flank	0.000459971	TH	RCC2 Synonymous	0.000854838	RCC2
274	PTPRC Intron	0.000503709	PTPRC	HLA-A 34.0 Non_Silent	0.000599787	HLA-A	MSH6 162.0 Intron	0.000798821	MSH6	CREB3L2 UTR	0.000805854	CREB3L2	SF3B1 Flank	0.000456698	SF3B1	MET Synonymous	0.000850146	MET
275	CR1 Intron	0.000502228	CR1	COL1A1 Non_Silent	0.000596213	COL1A1	TSC1 Intron	0.000798741	TSC1	ZCCHC8 UTR	0.000805496	ZCCHC8	CIC 0.0 Flank	0.000451966	CIC	WNK2 Synonymous	0.000849903	WNK2
276	39240895-39240896-chr22-Intron-DEL-TC-TC--	0.000500138	PDGFB	XPC 667.0 Non_Silent	0.000595036	XPC	92000141-92000142-chr14-Intron-DEL-AC-AC--	0.000798416	TRIP11	BCL10 UTR	0.000803105	BCL10	FAT3 Flank	0.00045167	FAT3	ROBO2 Synonymous	0.00084496	ROBO2
277	SET Intron	0.000498369	SET	72957814-72957816-chr16-In_Frame_Del-DEL-CCA-CCA--	0.000594672	ZFHX3	F2 149.0 Intron	0.000795706	F2	CDKN1B UTR	0.00080161	CDKN1B	ZMYM3 Flank	0.000444223	ZMYM3	69879314-69879314-chr3-Synonymous-SNP-A-A-C	0.000840299	MITF
278	GK Intron	0.000496792	GK	FIP1L1 Non_Silent	0.000594353	FIP1L1	RNF4 Intron	0.000795696	RNF4	FEN1 UTR	0.000801573	FEN1	31399509-31399509-chr22-5'Flank-SNP-T-T-G	0.000442757	DRG1	SFPQ Synonymous	0.000839489	SFPQ
279	BUB1 Non_Silent	0.000496472	BUB1	SDHA 367.0 Non_Silent	0.000593565	SDHA	8907564-8907565-chr19-Intron-DEL-GT-GT--	0.000791959	MUC16	RAC1 UTR	0.000799402	RAC1	159790413-159790413-chr6-5'Flank-SNP-C-C-T	0.000441847	TCP1	PPARG Synonymous	0.000838265	PPARG
280	USP8 1368.0 Non_Silent	0.00049493	USP8	TFG Non_Silent	0.000591239	TFG	POLG Intron	0.000787323	POLG	TMEM127 UTR	0.000798679	TMEM127	NIN Flank	0.000436424	NIN	ETV4 Synonymous	0.000834039	ETV4
281	CR1 1364.0 Intron	0.000492463	CR1	SIRPA 413.0 Non_Silent	0.000588975	SIRPA	RPN1 Intron	0.000780581	RPN1	HLF 1121.0 UTR	0.000789232	HLF	PTPRB 1770.0 Flank	0.000435159	PTPRB	ELN Synonymous	0.000828203	ELN
282	ARHGEF12 Intron	0.000492207	ARHGEF12	HIC2 Non_Silent	0.000587363	HIC2	EP300 Intron	0.000780452	EP300	DRG1 690.0 UTR	0.000781293	DRG1	NKX2-1 68.0 Flank	0.000434533	NKX2-1	EPHA7 Synonymous	0.000826487	EPHA7
283	SPECC1 Intron	0.000490342	SPECC1	FKBP9 Non_Silent	0.000586191	FKBP9	PRDM16 Intron	0.000779548	PRDM16	IK UTR	0.000772168	IK	EZR Flank	0.000434235	EZR	PC Synonymous	0.000814254	PC
284	ANK1 Intron	0.000490051	ANK1	7673781-7673781-chr17-Missense_Mutation-SNP-C-C-G	0.000581021	TP53	MUC16 947.0 Intron	0.000775671	MUC16	ZNF2 UTR	0.000771831	ZNF2	SEPT6 Flank	0.000428549	SEPT6	AFF3 Synonymous	0.000810964	AFF3
285	33010752-33010752-chr1-3'Flank-SNP-C-C-T	0.000488956	AK2	PABPC1 253.0 Non_Silent	0.000579089	PABPC1	AFF3 Intron	0.000773669	AFF3	FBLN2 424.0 UTR	0.000765471	FBLN2	SDHC Flank	0.000425581	SDHC	PER1 88.0 Synonymous	0.000805926	PER1
286	PRDM2 Non_Silent	0.000488778	PRDM2	SLC45A3 Non_Silent	0.000578641	SLC45A3	STAT6 88.0 Intron	0.000771924	STAT6	KMT2C UTR	0.000761133	KMT2C	ZNF479 256.0 Flank	0.000422195	ZNF479	TF Synonymous	0.00080431	TF
287	MYH11 Intron	0.000487421	MYH11	KMT2C 2262.0 Non_Silent	0.000578381	KMT2C	USP6 42.0 Intron	0.000771298	USP6	HSP90AB1 132.0 UTR	0.000758641	HSP90AB1	SS18L1 0.0 Flank	0.000421283	SS18L1	NUTM2B Synonymous	0.000802362	NUTM2B
288	ERBB2 Non_Silent	0.000485849	ERBB2	BRCA1 Non_Silent	0.000576082	BRCA1	CEP89 Intron	0.000767035	CEP89	MT2A UTR	0.000752423	MT2A	CDH11 Flank	0.000420843	CDH11	NTRK3 Synonymous	0.000799046	NTRK3
289	2945755-2945755-chr7-Intron-SNP-G-G-C	0.000485326	CARD11	PIK3CB Non_Silent	0.000573313	PIK3CB	2945755-2945755-chr7-Intron-SNP-G-G-C	0.000766854	CARD11	NPM1 462.0 UTR	0.000750488	NPM1	65504309-65504311-chr11-5'Flank-DEL-TTT-TTT--	0.000418974	MALAT1	GNA11 Synonymous	0.000798303	GNA11
290	NF1 1738.0 Intron	0.000484408	NF1	GRM3 Non_Silent	0.000570326	GRM3	COL1A1 111.0 Intron	0.000764096	COL1A1	94479275-94479276-chr13-5'UTR-DEL-CT-CT--	0.000742684	DCT	RDM1 256.0 Flank	0.000417919	RDM1	GC Synonymous	0.00079568	GC
291	PTPRT Intron	0.00048384	PTPRT	ARNT Non_Silent	0.000569186	ARNT	A1CF 881.0 Intron	0.000763478	A1CF	ARNT UTR	0.000742018	ARNT	69757521-69757521-chr16-5'Flank-SNP-A-A-G	0.000416855	WWP2	BCL9L 138.0 Synonymous	0.000787312	BCL9L
292	113145994-113145994-chr10-Intron-SNP-G-G-T	0.000478801	TCF7L2	TP53 26.0 Non_Silent	0.000567663	TP53	MSI2 Intron	0.000760975	MSI2	NRG1 UTR	0.000739855	NRG1	DCD Flank	0.0004126	DCD	WHSC1 Synonymous	0.000783724	WHSC1
293	ROS1 Synonymous	0.000474814	ROS1	PLAG1 116.0 Non_Silent	0.000567651	PLAG1	BRAF Intron	0.00076016	BRAF	FAM135B UTR	0.000734204	FAM135B	TRAF7 Flank	0.000410277	TRAF7	GAS7 Synonymous	0.000783214	GAS7
294	HSP90AB1 Synonymous	0.00046962	HSP90AB1	TP53 134.0 Non_Silent	0.000566686	TP53	LHFP Intron	0.000758068	LHFP	DDX10 UTR	0.000733275	DDX10	RCC2 Flank	0.000410177	RCC2	WT1 Synonymous	0.000773302	WT1
295	68529886-68529887-chr17-Intron-INS-----TGTT	0.000469471	PRKAR1A	AFF3 1123.0 Non_Silent	0.00056635	AFF3	SDHB 184.0 Intron	0.000749738	SDHB	26780772-26780773-chr1-3'UTR-INS-----C	0.000733165	ARID1A	EIF4A2 0.0 Flank	0.000406114	EIF4A2	STIL 616.0 Synonymous	0.000768475	STIL
296	NFKBIE Non_Silent	0.000469274	NFKBIE	131127655-131127655-chr9-Missense_Mutation-SNP-G-G-T	0.00056623	NUP214	MTA1 Intron	0.000748201	MTA1	TRIM3 342.0 UTR	0.00073088	TRIM3	HIST1H3B Flank	0.000404536	HIST1H3B	47805619-47805619-chr2-Splice_Region-SNP-T-T-G	0.000766978	MSH6
297	RGPD3 561.0 Non_Silent	0.000468495	RGPD3	MYH1 Non_Silent	0.000563689	MYH1	PTCH1 Intron	0.000746957	PTCH1	EGFR UTR	0.000726572	EGFR	FEV Flank	0.000404409	FEV	ZMYM3 Synonymous	0.000766826	ZMYM3
298	TCL1A 37.0 Intron	0.00046743	TCL1A	41236628-41236628-chr3-Missense_Mutation-SNP-C-C-A	0.00056255	CTNNB1	CP Intron	0.000746488	CP	SDHA 1.0 UTR	0.000721446	SDHA	HSP90AB1 Flank	0.000401695	HSP90AB1	MITF 2797.0 Synonymous	0.000765199	MITF
299	26780772-26780773-chr1-3'UTR-INS-----C	0.000467092	ARID1A	C3 Non_Silent	0.000561601	C3	148828714-148828714-chr7-Intron-SNP-C-C-A	0.000745808	EZH2	IKZF1 UTR	0.000719219	IKZF1	CLIP1 2155.0 Flank	0.00039879	CLIP1	MUT Synonymous	0.000761781	MUT
300	ROBO2 Non_Silent	0.000465685	ROBO2	MLLT1 238.0 Non_Silent	0.000558964	MLLT1	KIF5B Intron	0.000742268	KIF5B	NF2 1826.0 UTR	0.000717327	NF2	DAXX 91.0 Flank	0.0003921	DAXX	44253562-44253562-chr6-Synonymous-SNP-C-C-T	0.000760602	HSP90AB1
301	ATM Intron	0.000465103	ATM	60856479-60856481-chr8-In_Frame_Del-DEL-GGA-GGA--	0.000553207	CHD7	KDM6A 4064.0 Intron	0.000742064	KDM6A	EBF1 8072.0 UTR	0.000715954	EBF1	HOXA13 Flank	0.000389883	HOXA13	PABPC1 126.0 Synonymous	0.000760174	PABPC1
302	TRAF7 Intron	0.00046282	TRAF7	PABPC1 80.0 Non_Silent	0.000551029	PABPC1	ATP2B3 Intron	0.000741563	ATP2B3	PAX8 1249.0 UTR	0.00071227	PAX8	DRG1 0.0 Flank	0.000386344	DRG1	FGFR1 Synonymous	0.000755568	FGFR1
303	AFF4 Synonymous	0.000462634	AFF4	USP6 Non_Silent	0.000544154	USP6	F5 Intron	0.000739365	F5	256458-256458-chr5-3'UTR-SNP-A-A-G	0.000705222	SDHA	PCM1 Flank	0.000382913	PCM1	HOXD13 Synonymous	0.000753831	HOXD13
304	PABPC1 252.0 Non_Silent	0.000462384	PABPC1	AK2 6.0 Non_Silent	0.000540808	AK2	MET 1945.0 Intron	0.000735133	MET	TRIM3 343.0 UTR	0.000703418	TRIM3	CTNNA2 0.0 Flank	0.00037909	CTNNA2	EP300 Synonymous	0.000751833	EP300
305	COL2A1 Non_Silent	0.000461543	COL2A1	POLG 61.0 Non_Silent	0.000540321	POLG	MAP2K1 Intron	0.000734748	MAP2K1	RGPD3 UTR	0.000702564	RGPD3	WNK2 Flank	0.000378908	WNK2	CSF1R Synonymous	0.000750331	CSF1R
306	SRGAP3 Intron	0.000458094	SRGAP3	72797459-72797461-chr16-In_Frame_Del-DEL-TTG-TTG--	0.000539988	ZFHX3	2945756-2945757-chr7-Intron-DEL-AC-AC--	0.000733168	CARD11	GNAS 9.0 UTR	0.000695519	GNAS	ALK Flank	0.000375268	ALK	PABPC1 254.0 Synonymous	0.000750317	PABPC1
307	ZEB1 840.0 Intron	0.000451529	ZEB1	21974721-21974721-chr9-Missense_Mutation-SNP-G-G-C	0.000536032	CDKN2A	87228974-87228974-chr10-Intron-SNP-C-C-G	0.000731921	NUTM2A	PAX3 27.0 UTR	0.000694205	PAX3	PPP6C Flank	0.000366842	PPP6C	HNF1A Synonymous	0.000744705	HNF1A
308	32648391-32648392-chr8-Intron-DEL-AG-AG--	0.000451126	NRG1	BMP5 Non_Silent	0.000535051	BMP5	EGF Intron	0.000731249	EGF	PER1 UTR	0.000692274	PER1	50870841-50870841-chr19-5'Flank-SNP-C-C-G	0.000362637	KLK2	BRD4 Synonymous	0.000738518	BRD4
309	PTPRB Non_Silent	0.000450828	PTPRB	AFF1 Non_Silent	0.000534027	AFF1	WHSC1L1 Intron	0.000725837	WHSC1L1	RBM15 157.0 UTR	0.000692162	RBM15	PRDM16 0.0 Flank	0.000359591	PRDM16	SDHA 763.0 Synonymous	0.000736882	SDHA
310	USP8 Non_Silent	0.000449026	USP8	50492753-50492753-chr15-Missense_Mutation-SNP-C-C-T	0.00053183	USP8	SDHA 761.0 Intron	0.000725577	SDHA	IL7R UTR	0.000690921	IL7R	PRPF4 Flank	0.000359212	PRPF4	AK2 6.0 Synonymous	0.000735735	AK2
311	PPP6C Non_Silent	0.000448584	PPP6C	NT5C2 Non_Silent	0.000526687	NT5C2	CP 190.0 Intron	0.000724807	CP	PAX3 39.0 UTR	0.000688358	PAX3	MUTYH 0.0 Flank	0.00035611	MUTYH	NUP214 Synonymous	0.000735206	NUP214
312	PABPC1 126.0 Non_Silent	0.000448017	PABPC1	ARAF Non_Silent	0.000526524	ARAF	FANCD2 403.0 Intron	0.000721593	FANCD2	FNBP1 UTR	0.000688037	FNBP1	NCOR2 3418.0 Flank	0.000353946	NCOR2	117389729-117389729-chr6-Synonymous-SNP-G-G-T	0.000732624	ROS1
313	BIRC6 Intron	0.000444276	BIRC6	50492758-50492758-chr15-Missense_Mutation-SNP-C-C-A	0.000524212	USP8	GMPS Intron	0.000715266	GMPS	POU2AF1 UTR	0.000685242	POU2AF1	PPFIBP1 Flank	0.000353529	PPFIBP1	EWSR1 Synonymous	0.000725361	EWSR1
314	LARP4 Intron	0.000443358	LARP4	CLIP1 1107.0 Non_Silent	0.000523838	CLIP1	ELL Intron	0.000710368	ELL	TNFRSF17 UTR	0.000684415	TNFRSF17	NIN 0.0 Flank	0.000353419	NIN	TSC2 Synonymous	0.000723387	TSC2
315	KMT2A Intron	0.000443266	KMT2A	BIRC6 Non_Silent	0.000521505	BIRC6	ACSL3 Intron	0.000706955	ACSL3	AMER1 UTR	0.000679913	AMER1	LZTR1 342.0 Flank	0.000348888	LZTR1	29942827-29942827-chr6-Synonymous-SNP-C-C-A	0.000718476	HLA-A
316	AK2 Non_Silent	0.000441474	AK2	236561-236561-chr5-Missense_Mutation-SNP-G-G-A	0.000519759	SDHA	BCL9L 321.0 Intron	0.0007066	BCL9L	KAT6A 2394.0 UTR	0.000674927	KAT6A	29950023-29950023-chr6-3'Flank-SNP-C-C-A	0.000345039	HLA-A	PTPN13 Synonymous	0.000716214	PTPN13
317	TEC Non_Silent	0.000441324	TEC	33013287-33013287-chr1-Missense_Mutation-SNP-C-C-T	0.000517062	AK2	MAP3K13 Intron	0.000706439	MAP3K13	MALT1 UTR	0.000670314	MALT1	18033669-18033669-chr8-3'Flank-SNP-C-C-T	0.000341019	PCM1	ERCC5 Synonymous	0.000714551	ERCC5
318	SIRPA Non_Silent	0.000440557	SIRPA	NR4A3 130.0 Non_Silent	0.000515411	NR4A3	NFATC2 Intron	0.000705019	NFATC2	DEK UTR	0.000668583	DEK	ID1 0.0 Flank	0.000340409	ID1	BCL9L Synonymous	0.000713053	BCL9L
319	BRD3 Non_Silent	0.000437164	BRD3	IK 105.0 Non_Silent	0.000514539	IK	EED 482.0 Intron	0.00070232	EED	ARHGEF12 UTR	0.000665662	ARHGEF12	SUZ12 Flank	0.00032659	SUZ12	RNF43 222.0 Synonymous	0.00071123	RNF43
320	A1CF Intron	0.000436245	A1CF	KMT2C 2079.0 Non_Silent	0.000514103	KMT2C	MLLT4 Intron	0.0006989	MLLT4	ROBO2 UTR	0.000664544	ROBO2	FOXR1 193.0 Flank	0.00032131	FOXR1	PARG Synonymous	0.000710714	PARG
321	AK2 Synonymous	0.0004329	AK2	100705027-100705027-chr8-Missense_Mutation-SNP-T-T-A	0.000510346	PABPC1	EPAS1 Intron	0.000697495	EPAS1	FHIT UTR	0.000663515	FHIT	SGK1 114.0 Flank	0.00032114	SGK1	COL1A1 Synonymous	0.000706918	COL1A1
322	CACNA1D Non_Silent	0.00043262	CACNA1D	MSH6 Non_Silent	0.00050861	MSH6	RAF1 Intron	0.000696914	RAF1	CRTC1 UTR	0.000662708	CRTC1	HIP1 4114.0 Flank	0.00032112	HIP1	EGFR Synonymous	0.000706893	EGFR
323	PTK6 89.0 Intron	0.000432476	PTK6	KAT6B 3911.0 Non_Silent	0.000506271	KAT6B	WRN Intron	0.000694683	WRN	RNF43 UTR	0.000657874	RNF43	CD74 214.0 Flank	0.000320236	CD74	DDR2 Synonymous	0.000706655	DDR2
324	WHSC1L1 Intron	0.000430784	WHSC1L1	10902097-10902097-chr16-Missense_Mutation-SNP-A-A-C	0.000505945	CIITA	PBX1 Intron	0.000693954	PBX1	ELF4 UTR	0.000654054	ELF4	AXIN1 Flank	0.000319801	AXIN1	FAT1 2424.0 Synonymous	0.000706277	FAT1
325	SPOP Non_Silent	0.000427879	SPOP	KRAS Non_Silent	0.000505565	KRAS	PTPRK Intron	0.000693373	PTPRK	SF1 22.0 UTR	0.000651147	SF1	ATR 2593.0 Flank	0.00031827	ATR	BTG1 Synonymous	0.000703229	BTG1
326	125415028-125415028-chr4-Missense_Mutation-SNP-A-A-C	0.000427172	FAT4	BCOR 21.0 Non_Silent	0.000505561	BCOR	MYH1 Intron	0.000693326	MYH1	STRN 115.0 UTR	0.000649727	STRN	MPL Flank	0.00031748	MPL	DDX1 Synonymous	0.000701569	DDX1
327	FIP1L1 Non_Silent	0.000426638	FIP1L1	PABPC1 43.0 Non_Silent	0.00050509	PABPC1	BARD1 Intron	0.000691543	BARD1	HIP1 97.0 UTR	0.000648497	HIP1	TCP1 227.0 Flank	0.000314591	TCP1	8952839-8952839-chr19-Synonymous-SNP-T-T-G	0.000700028	MUC16
328	JAK1 Intron	0.000424393	JAK1	HR Non_Silent	0.000504917	HR	LIFR Intron	0.000690863	LIFR	PHOX2B UTR	0.000643581	PHOX2B	ELL Flank	0.000312409	ELL	68686517-68686517-chr10-Synonymous-SNP-A-A-C	0.00069928	TET1
329	PDGFRA Non_Silent	0.000424003	PDGFRA	KAT6B Non_Silent	0.000503474	KAT6B	9764976-9764978-chr16-Intron-DEL-CAG-CAG--	0.000690146	GRIN2A	ROBO2 18.0 UTR	0.00064315	ROBO2	EZR 1051.0 Flank	0.000310589	EZR	DCTN1 Synonymous	0.000696265	DCTN1
330	C3 Intron	0.000421604	C3	PALB2 Non_Silent	0.000502127	PALB2	FUS Intron	0.000689841	FUS	RALGDS UTR	0.000640495	RALGDS	7751214-7751214-chr19-5'Flank-DEL-A-A--	0.000307905	CD209	FANCD2 404.0 Synonymous	0.000693005	FANCD2
331	CSMD3 Synonymous	0.000421567	CSMD3	BRD3 Non_Silent	0.000501468	BRD3	8896143-8896143-chr19-Intron-SNP-G-G-A	0.000688515	MUC16	GNAQ 6305.0 UTR	0.000640483	GNAQ	GATA3 0.0 Flank	0.000305658	GATA3	ALK Synonymous	0.000684437	ALK
332	RGPD3 404.0 Non_Silent	0.000420698	RGPD3	XPO1 Non_Silent	0.000499966	XPO1	TCL1A Intron	0.000688186	TCL1A	256434-256434-chr5-3'UTR-SNP-G-G-A	0.000621061	SDHA	75784539-75784539-chr17-5'Flank-SNP-C-C-A	0.00030547	H3F3B	MECOM 617.0 Synonymous	0.000675921	MECOM
333	LASP1 Intron	0.000419549	LASP1	ERCC3 Non_Silent	0.000494202	ERCC3	77596782-77596782-chr3-Intron-SNP-G-G-T	0.000687795	ROBO2	159099509-159099509-chr5-5'UTR-SNP-T-T-C	0.000620141	EBF1	207052260-207052260-chr1-5'Flank-DEL-T-T--	0.000302977	YOD1	NCOA1 Synonymous	0.000666801	NCOA1
334	CNTRL Non_Silent	0.000419473	CNTRL	8886831-8886831-chr19-Missense_Mutation-SNP-G-G-A	0.000494137	MUC16	KDR 647.0 Intron	0.000685337	KDR	CDX2 UTR	0.000619026	CDX2	50870981-50870981-chr19-5'Flank-SNP-C-C-T	0.000295993	KLK2	RIN2 Synonymous	0.00066669	RIN2
335	FLT3 Intron	0.000416334	FLT3	TSHR Non_Silent	0.000490575	TSHR	BCL9L 135.0 Intron	0.00068439	BCL9L	STAT5B UTR	0.000616346	STAT5B	TNFRSF14 151.0 Flank	0.000294184	TNFRSF14	CHD2 Synonymous	0.000658375	CHD2
336	PBRM1 Intron	0.000416327	PBRM1	RHOA Non_Silent	0.000489754	RHOA	PAX5 Intron	0.000683802	PAX5	PDE4D 112.0 UTR	0.000612675	PDE4D	MDM2 Flank	0.000293744	MDM2	ARNT Synonymous	0.000653325	ARNT
337	POLG Non_Silent	0.000414808	POLG	AK2 4.0 Non_Silent	0.000484715	AK2	ATP1A1 Intron	0.000679948	ATP1A1	SLC34A2 422.0 UTR	0.000611048	SLC34A2	SFPQ 206.0 Flank	0.000292555	SFPQ	CSF3R Synonymous	0.000650813	CSF3R
338	NOTCH1 Intron	0.000413307	NOTCH1	PRDM2 1475.0 Non_Silent	0.000484335	PRDM2	RPL5 Intron	0.000674834	RPL5	25676909-25676910-chr4-3'UTR-INS-----G	0.000609414	SLC34A2	CTNNA2 Flank	0.00029071	CTNNA2	CA2 Synonymous	0.000649893	CA2
339	PDGFB Intron	0.000412879	PDGFB	MN1 Non_Silent	0.000481251	MN1	ELN Intron	0.000673915	ELN	BCL9 UTR	0.000607569	BCL9	196044902-196044902-chr3-3'Flank-SNP-G-G-A	0.00028499	TFRC	CIC 160.0 Synonymous	0.000649168	CIC
340	31361107-31361107-chr10-Intron-SNP-T-T-C	0.000412314	ZEB1	100709477-100709477-chr8-Missense_Mutation-SNP-G-G-T	0.000477685	PABPC1	WT1 Intron	0.000672641	WT1	AXIN1 14.0 UTR	0.000603641	AXIN1	159790392-159790392-chr6-5'Flank-SNP-A-A-C	0.000282679	TCP1	197408400-197408400-chr2-Synonymous-SNP-T-T-G	0.000647309	SF3B1
341	31181787-31181787-chr17-Splice_Site-SNP-T-T-G	0.000411502	NF1	WWTR1 444.0 Non_Silent	0.000473902	WWTR1	EPHA7 Intron	0.000671898	EPHA7	SET UTR	0.000600398	SET	TEC 0.0 Flank	0.000280804	TEC	41668951-41668951-chr15-Synonymous-SNP-A-A-G	0.000643789	MGA
342	NTRK3 Intron	0.000409498	NTRK3	MUC4 792.0 Non_Silent	0.0004715	MUC4	LRP1 1447.0 Intron	0.000671625	LRP1	PPP2R1A UTR	0.00059941	PPP2R1A	TFEB Flank	0.000276561	TFEB	LMNA Synonymous	0.000641571	LMNA
343	FCGR2B Intron	0.000408981	FCGR2B	KMT2C 843.0 Non_Silent	0.000470297	KMT2C	LEF1 Intron	0.000670378	LEF1	222201298-222201299-chr2-3'UTR-INS-----C	0.000597206	PAX3	PTPRB Flank	0.000273578	PTPRB	CNBD1 Synonymous	0.000640548	CNBD1
344	7766594-7766595-chr1-3'UTR-DEL-CA-CA--	0.00040867	CAMTA1	PER1 Non_Silent	0.000468638	PER1	NSD1 Intron	0.000668145	NSD1	CLIP1 UTR	0.000596871	CLIP1	CLP1 75.0 Flank	0.000272707	CLP1	FBLN2 Synonymous	0.000638345	FBLN2
345	105751385-105751386-chr3-Intron-DEL-AG-AG--	0.000408637	CBLB	152265049-152265049-chr7-Nonsense_Mutation-SNP-G-G-T	0.000467439	KMT2C	112682713-112682714-chr8-Intron-DEL-AG-AG--	0.00066456	CSMD3	IL6 UTR	0.000595457	IL6	190179606-190179606-chr4-3'Flank-SNP-G-G-C	0.00027259	DUX4	ERCC3 Synonymous	0.000637952	ERCC3
346	TRRAP 1966.0 Non_Silent	0.000407375	TRRAP	KDM6A 4328.0 Non_Silent	0.000466197	KDM6A	PTPRC Intron	0.000663575	PTPRC	CDKN1A UTR	0.000587534	CDKN1A	MED1 895.0 Flank	0.0002712	MED1	PTK6 Synonymous	0.000637225	PTK6
347	CHD7 Synonymous	0.000406987	CHD7	KMT2C 2265.0 Non_Silent	0.000463396	KMT2C	MB21D2 Intron	0.000662606	MB21D2	SPECC1 4542.0 UTR	0.000583849	SPECC1	TNF 57.0 Flank	0.000271077	TNF	37907554-37907554-chr7-Synonymous-SNP-A-A-G	0.000636872	SFRP4
348	SUZ12 Intron	0.000406734	SUZ12	ZMYM3 Non_Silent	0.000459169	ZMYM3	HLA-A 48.0 Intron	0.000660306	HLA-A	PRDM16 1.0 UTR	0.000581034	PRDM16	CALR Flank	0.000269635	CALR	ID1 Synonymous	0.000635845	ID1
349	CUX1 Intron	0.000406044	CUX1	26773691-26773693-chr1-In_Frame_Del-DEL-GCA-GCA--	0.000458294	ARID1A	74057710-74057710-chr7-Intron-SNP-A-A-C	0.000659208	ELN	PRDM2 UTR	0.00057863	PRDM2	PLCG1 0.0 Flank	0.000268411	PLCG1	38991526-38991526-chr22-Synonymous-SNP-C-C-T	0.0006344	APOBEC3B
350	NUMA1 Non_Silent	0.000404892	NUMA1	RUNX1 Non_Silent	0.00045675	RUNX1	MB21D2 2416.0 Intron	0.000658048	MB21D2	SGK1 UTR	0.00057806	SGK1	35915576-35915576-chr17-3'Flank-SNP-C-C-T	0.000268206	RDM1	CREBBP 95.0 Synonymous	0.00063393	CREBBP
351	100709671-100709671-chr8-Nonsense_Mutation-SNP-C-C-A	0.000402658	PABPC1	WWTR1 Non_Silent	0.000453517	WWTR1	NCOR1 Intron	0.000657806	NCOR1	DCAF12L2 29.0 UTR	0.00057795	DCAF12L2	35913727-35913727-chr17-3'Flank-SNP-A-A-G	0.00026782	RDM1	CRNKL1 Synonymous	0.000632672	CRNKL1
352	236534-236534-chr5-Missense_Mutation-SNP-C-C-T	0.000401503	SDHA	CASC5 Non_Silent	0.000452616	CASC5	32499524-32499525-chr2-Intron-DEL-TC-TC--	0.00065703	BIRC6	BCL11B UTR	0.000574797	BCL11B	MPL 0.0 Flank	0.000267039	MPL	MUC16 758.0 Synonymous	0.000626395	MUC16
353	CIC Non_Silent	0.000399096	CIC	CYLD Non_Silent	0.000449658	CYLD	FGFR4 Intron	0.000655354	FGFR4	EIF1 UTR	0.000574482	EIF1	NCOR1 Flank	0.00026495	NCOR1	ANK1 Synonymous	0.000621891	ANK1
354	NFATC2 Intron	0.000399048	NFATC2	CALR Non_Silent	0.000448869	CALR	TSC2 158.0 Intron	0.000655349	TSC2	AMT UTR	0.000571849	AMT	SDHC 0.0 Flank	0.000264851	SDHC	TFE3 Synonymous	0.000620988	TFE3
355	LRP1 Intron	0.000398539	LRP1	HSP90AB1 61.0 Non_Silent	0.000448617	HSP90AB1	KDR Intron	0.000654624	KDR	HIF1A UTR	0.00056917	HIF1A	29949926-29949926-chr6-3'Flank-SNP-G-G-A	0.000264462	HLA-A	23314603-23314603-chr22-Synonymous-SNP-G-G-A	0.000619299	BCR
356	BCORL1 1468.0 Non_Silent	0.000397636	BCORL1	98976756-98976756-chr7-Missense_Mutation-SNP-A-A-C	0.00044815	TRRAP	LEF1 617.0 Intron	0.000654016	LEF1	MUC16 2650.0 UTR	0.000567767	MUC16	ZNF521 5806.0 Flank	0.000263067	ZNF521	USP8 1368.0 Synonymous	0.000618767	USP8
357	FLNA Intron	0.000396514	FLNA	CLTC Non_Silent	0.000443499	CLTC	SGK1 2566.0 Intron	0.000652499	SGK1	SEPT9 4346.0 UTR	0.000559198	SEPT9	32003182-32003183-chr17-3'Flank-INS-----GGT	0.000260782	SUZ12	F2 Synonymous	0.000618178	F2
358	PABPC1 42.0 Non_Silent	0.000395407	PABPC1	152247975-152247975-chr7-Missense_Mutation-SNP-G-G-A	0.000442412	KMT2C	PRDM1 Intron	0.000650467	PRDM1	C7 UTR	0.000557561	C7	126165952-126165952-chrX-5'Flank-SNP-G-G-A	0.000260761	DCAF12L2	KMT2C 2267.0 Synonymous	0.000616389	KMT2C
359	PABPC1 132.0 Non_Silent	0.000395169	PABPC1	RBM10 Non_Silent	0.000436599	RBM10	KTN1 Intron	0.000649544	KTN1	PHF6 UTR	0.000553986	PHF6	BCORL1 Flank	0.000253294	BCORL1	UTY Synonymous	0.000613912	UTY
360	KMT2D 291.0 Non_Silent	0.000391959	KMT2D	27095695-27095697-chr7-In_Frame_Del-DEL-CGA-CGA--	0.00043627	HOXA1	KAT6A Intron	0.000646493	KAT6A	RET UTR	0.000553384	RET	SP8 Flank	0.00025268	SP8	ZFHX3 274.0 Synonymous	0.000613007	ZFHX3
361	PALB2 Non_Silent	0.000391083	PALB2	ERCC3 642.0 Non_Silent	0.000433971	ERCC3	FGFR3 Intron	0.000646234	FGFR3	99551448-99551448-chr2-3'UTR-SNP-C-C-A	0.000552702	AFF3	MECOM 0.0 Flank	0.000251849	MECOM	BCR 2632.0 Synonymous	0.000611391	BCR
362	UBR5 Intron	0.000390584	UBR5	TGFBR2 Non_Silent	0.000433188	TGFBR2	BIRC6 3503.0 Intron	0.000646187	BIRC6	EXT1 102.0 UTR	0.000546225	EXT1	10738668-10738668-chr22-5'Flank-SNP-A-A-G	0.000248187	U2	HIST1H4I Synonymous	0.000605264	HIST1H4I
363	PAX5 1801.0 Intron	0.000389198	PAX5	ZNF521 Non_Silent	0.000432146	ZNF521	36923307-36923308-chr9-Intron-DEL-TC-TC--	0.000644695	PAX5	TBP 51.0 UTR	0.0005455	TBP	H3F3B 68.0 Flank	0.000246925	H3F3B	TET1 2518.0 Synonymous	0.000604793	TET1
364	ZFHX3 292.0 Non_Silent	0.000389194	ZFHX3	HSP90AA1 82.0 Non_Silent	0.000431578	HSP90AA1	JAK2 Intron	0.000640231	JAK2	MYC UTR	0.000542014	MYC	DCAF12L2 0.0 Flank	0.000246766	DCAF12L2	JAK2 Synonymous	0.000604131	JAK2
365	FAT3 Intron	0.000387036	FAT3	USP8 1369.0 Non_Silent	0.000431135	USP8	NF1 2823.0 Intron	0.000639022	NF1	TAT UTR	0.000540631	TAT	CDK4 97.0 Flank	0.00024535	CDK4	FOXO1 Synonymous	0.0005998	FOXO1
366	COL1A1 111.0 Intron	0.000386972	COL1A1	FLNA Non_Silent	0.000429675	FLNA	31361084-31361084-chr10-Intron-SNP-T-T-C	0.000636796	ZEB1	HNF1A UTR	0.000536315	HNF1A	PIK3CB 2135.0 Flank	0.000244195	PIK3CB	CEP89 Synonymous	0.000597591	CEP89
367	122328150-122328150-chr12-Missense_Mutation-SNP-C-C-T	0.000385263	CLIP1	7673767-7673767-chr17-Missense_Mutation-SNP-C-C-T	0.000428855	TP53	59814600-59814601-chr10-Intron-DEL-AC-AC--	0.000635865	CCDC6	PIM1 UTR	0.000534705	PIM1	CUL3 2306.0 Flank	0.000242124	CUL3	50492857-50492857-chr15-Synonymous-SNP-C-C-T	0.000594262	USP8
368	BCOR Non_Silent	0.000384576	BCOR	NUP214 42.0 Non_Silent	0.000423872	NUP214	EZR 430.0 Intron	0.000633492	EZR	PRDM1 UTR	0.00053333	PRDM1	KDM5A 0.0 Flank	0.000241149	KDM5A	NSD1 Synonymous	0.00059418	NSD1
369	41708668-41708669-chr8-Intron-DEL-AC-AC--	0.000384109	ANK1	7675136-7675136-chr17-Missense_Mutation-SNP-G-G-A	0.000422545	TP53	POLG 217.0 Intron	0.000632912	POLG	CSMD3 UTR	0.000531246	CSMD3	TPM3 496.0 Flank	0.000241059	TPM3	3731513-3731513-chr11-Synonymous-SNP-T-T-G	0.000589565	NUP98
370	CTNNA2 Intron	0.000383865	CTNNA2	MUC4 763.0 Non_Silent	0.000420699	MUC4	USP6 43.0 Intron	0.000632848	USP6	ZFHX3 UTR	0.000529971	ZFHX3	127867954-127867954-chr9-3'Flank-SNP-G-G-T	0.000239979	AK1	MECOM 5934.0 Synonymous	0.000586612	MECOM
371	PARG Intron	0.00038038	PARG	29049831-29049833-chr22-In_Frame_Del-DEL-CAG-CAG--	0.000418192	ZNRF3	BIRC6 2850.0 Intron	0.000632426	BIRC6	EPAS1 UTR	0.000525353	EPAS1	FAT4 0.0 Flank	0.000238412	FAT4	RNF43 Synonymous	0.000579227	RNF43
372	GAS7 Intron	0.000379032	GAS7	18263848-18263850-chr6-In_Frame_Del-DEL-TCC-TCC--	0.000418181	DEK	DNM2 1372.0 Intron	0.000632298	DNM2	TRRAP UTR	0.000520263	TRRAP	FLCN Flank	0.000234671	FLCN	ARID1A Synonymous	0.000576085	ARID1A
373	TP53 117.0 Non_Silent	0.000378616	TP53	LIFR Non_Silent	0.000416738	LIFR	SFRP4 Intron	0.00063221	SFRP4	78992725-78992725-chr17-3'UTR-SNP-A-A-C	0.000519897	CANT1	NUTM2A 192.0 Flank	0.000234009	NUTM2A	CCDC6 Synonymous	0.000575946	CCDC6
374	CREBBP Intron	0.000377054	CREBBP	PDE4DIP 2313.0 Non_Silent	0.000415902	PDE4DIP	HLA-A 58.0 Intron	0.000631315	HLA-A	144511355-144511355-chr8-3'UTR-SNP-T-T-G	0.000515344	RECQL4	97700040-97700040-chr9-5'Flank-SNP-C-C-A	0.000233991	XPA	DCC Synonymous	0.000575677	DCC
375	SFRP4 Synonymous	0.000376906	SFRP4	106457033-106457033-chr2-Missense_Mutation-SNP-C-C-T	0.000415799	RGPD3	BRCA2 Intron	0.000630166	BRCA2	ERCC2 32.0 UTR	0.000511965	ERCC2	TPM3 Flank	0.00023376	TPM3	RALGDS Synonymous	0.000575064	RALGDS
376	FANCD2 769.0 Non_Silent	0.000376378	FANCD2	FOXA1 41.0 Non_Silent	0.000413214	FOXA1	PTPN6 82.0 Intron	0.000630017	PTPN6	PAX5 UTR	0.000511536	PAX5	ACSL6 1235.0 Flank	0.000233491	ACSL6	HLA-A 33.0 Synonymous	0.000574279	HLA-A
377	BTK Intron	0.00037559	BTK	87115030-87115030-chr4-Missense_Mutation-SNP-C-C-A	0.000412839	AFF1	IL7R Intron	0.000628277	IL7R	PDCD1LG2 UTR	0.00050663	PDCD1LG2	35916086-35916086-chr17-3'Flank-SNP-C-C-T	0.000233075	RDM1	POLD1 Synonymous	0.000573905	POLD1
378	NRG1 1994.0 Intron	0.000375264	NRG1	42291675-42291675-chr19-Missense_Mutation-SNP-G-G-C	0.000412292	CIC	KMT2C 2258.0 Intron	0.000627431	KMT2C	SMARCB1 UTR	0.000505598	SMARCB1	SEPT6 0.0 Flank	0.000232779	SEPT6	NUP98 1129.0 Synonymous	0.000573406	NUP98
379	52321433-52321433-chr15-Missense_Mutation-SNP-A-A-C	0.000374619	MYO5A	RAD21 Non_Silent	0.000411681	RAD21	FANCD2 435.0 Intron	0.00062411	FANCD2	CCND1 UTR	0.000503601	CCND1	CD209 0.0 Flank	0.000230459	CD209	33013319-33013319-chr1-Synonymous-SNP-G-G-A	0.000571353	AK2
380	SGK1 Non_Silent	0.000374013	SGK1	ETV5 Non_Silent	0.000410695	ETV5	PC 49.0 Intron	0.000623566	PC	IST1 UTR	0.000503064	IST1	NFATC2 Flank	0.000228858	NFATC2	PRCC Synonymous	0.000571083	PRCC
381	USP8 Intron	0.000372445	USP8	6600591-6600591-chr12-Missense_Mutation-SNP-T-T-G	0.000408222	CHD4	MAP2 Intron	0.000622046	MAP2	NUP214 UTR	0.000502589	NUP214	FOXR1 Flank	0.000225275	FOXR1	PIK3CA Synonymous	0.000565528	PIK3CA
382	CARD11 Non_Silent	0.000372086	CARD11	MN1 1014.0 Non_Silent	0.000407312	MN1	29944118-29944118-chr6-Splice_Region-SNP-T-T-A	0.000621922	HLA-A	256433-256433-chr5-3'UTR-SNP-T-T-C	0.000496582	SDHA	50870935-50870935-chr19-5'Flank-SNP-G-G-A	0.000220045	KLK2	USP8 1367.0 Synonymous	0.000564848	USP8
383	37907554-37907554-chr7-Synonymous-SNP-A-A-G	0.000371903	SFRP4	BRCA2 Non_Silent	0.000406619	BRCA2	CRLF2 Intron	0.000620364	CRLF2	GNAQ UTR	0.000493584	GNAQ	ABI1 Flank	0.000219536	ABI1	NF1 Synonymous	0.000564029	NF1
384	PABPC1 136.0 Non_Silent	0.000371181	PABPC1	53453081-53453082-chr4-Frame_Shift_Del-DEL-AG-AG--	0.000405214	FIP1L1	SUFU Intron	0.000617372	SUFU	PRPF40B UTR	0.000492099	PRPF40B	SUZ12 1282.0 Flank	0.000219178	SUZ12	36473883-36473883-chr1-Synonymous-SNP-A-A-G	0.000562546	CSF3R
385	MTOR Intron	0.000370288	MTOR	KMT2C 2077.0 Non_Silent	0.000402624	KMT2C	CLTCL1 Intron	0.000617132	CLTCL1	ERBB3 UTR	0.000485864	ERBB3	97700598-97700598-chr9-5'Flank-SNP-G-G-A	0.000218716	XPA	P2RY8 Synonymous	0.000562394	P2RY8
386	152265209-152265209-chr7-Missense_Mutation-SNP-G-G-A	0.000369916	KMT2C	TRIM24 Non_Silent	0.000402596	TRIM24	ACSL6 738.0 Intron	0.000616588	ACSL6	BMPR1A UTR	0.000485417	BMPR1A	NTRK3 7601.0 Flank	0.00021743	NTRK3	NUTM1 Synonymous	0.000560372	NUTM1
387	TRIM2 UTR	0.000369545	TRIM2	DAXX Non_Silent	0.00040111	DAXX	MLLT3 Intron	0.000616475	MLLT3	EZH2 UTR	0.000482265	EZH2	POLQ Flank	0.00021733	POLQ	MUC4 761.0 Synonymous	0.000559582	MUC4
388	MALAT1 Flank	0.000368666	MALAT1	COL2A1 Non_Silent	0.000400841	COL2A1	29943642-29943642-chr6-Intron-SNP-A-A-G	0.000614836	HLA-A	PRF1 UTR	0.000482228	PRF1	CDK12 Flank	0.000216558	CDK12	SMARCA4 Synonymous	0.000556913	SMARCA4
389	MLLT4 Intron	0.000368571	MLLT4	IDH1 Non_Silent	0.000396471	IDH1	MYH1 348.0 Intron	0.000613942	MYH1	MUT UTR	0.000481692	MUT	PRPF40B Flank	0.000215623	PRPF40B	CSF3 Synonymous	0.000555692	CSF3
390	152273610-152273610-chr7-Intron-SNP-A-A-T	0.000366409	KMT2C	AFF1 2161.0 Non_Silent	0.000394579	AFF1	EPHA3 Intron	0.000610484	EPHA3	LZTR1 UTR	0.000481617	LZTR1	CUX1 Flank	0.000212355	CUX1	LMO2 Synonymous	0.000554898	LMO2
391	MUC4 Intron	0.000366389	MUC4	DNMT3A Non_Silent	0.000394157	DNMT3A	TCF12 29.0 Intron	0.000608132	TCF12	MSH6 UTR	0.000480983	MSH6	33010564-33010564-chr1-3'Flank-SNP-G-G-A	0.000211928	AK2	KDR Synonymous	0.000554214	KDR
392	TPR Intron	0.000366385	TPR	NTRK1 Non_Silent	0.000392974	NTRK1	MSH2 Intron	0.000607615	MSH2	CDK6 204.0 UTR	0.000479643	CDK6	PTPRB 0.0 Flank	0.000211163	PTPRB	SI Synonymous	0.000554016	SI
393	PSD Non_Silent	0.000364927	PSD	RANBP2 Non_Silent	0.000390645	RANBP2	LARP4 Intron	0.000605161	LARP4	TBP 359.0 UTR	0.000477602	TBP	SS18L1 775.0 Flank	0.000211014	SS18L1	NCOA2 381.0 Synonymous	0.000546246	NCOA2
394	NTRK1 Non_Silent	0.000363975	NTRK1	PRDM1 Non_Silent	0.000390182	PRDM1	PTPN6 Intron	0.000604182	PTPN6	ECT2L UTR	0.000476598	ECT2L	H3F3B Flank	0.000209784	H3F3B	8956346-8956346-chr19-Synonymous-SNP-T-T-G	0.000546155	MUC16
395	PRDM16 Intron	0.000361207	PRDM16	BCL9 Non_Silent	0.000387437	BCL9	ERC1 Intron	0.000603874	ERC1	NF1 UTR	0.000476119	NF1	IL21 Flank	0.000209576	IL21	AKT1 Synonymous	0.000543368	AKT1
396	CDH11 Intron	0.000359888	CDH11	152265083-152265083-chr7-Missense_Mutation-SNP-C-C-A	0.000386839	KMT2C	TFG 708.0 Intron	0.00060121	TFG	FAM46C 364.0 UTR	0.000474933	FAM46C	33323095-33323095-chr6-5'Flank-SNP-G-G-A	0.000202649	DAXX	SPECC1 Synonymous	0.000542232	SPECC1
397	106425156-106425156-chr2-Missense_Mutation-SNP-A-A-C	0.000358847	RGPD3	44250099-44250099-chr6-Missense_Mutation-SNP-T-T-G	0.000386764	HSP90AB1	DGCR8 Intron	0.000597901	DGCR8	PDGFRA UTR	0.000473449	PDGFRA	CASP8 1064.0 Flank	0.00020263	CASP8	KIAA1549 Synonymous	0.000542125	KIAA1549
398	CP Intron	0.00035781	CP	WRN Non_Silent	0.000385154	WRN	CIC 185.0 Intron	0.000595939	CIC	IL7 UTR	0.000472281	IL7	LAT Flank	0.000200746	LAT	NCOA2 926.0 Synonymous	0.000541331	NCOA2
399	POLD1 Intron	0.00035639	POLD1	100712775-100712775-chr8-Missense_Mutation-SNP-C-C-A	0.000384601	PABPC1	CIITA Intron	0.000594231	CIITA	HMGN2 55.0 UTR	0.000471825	HMGN2	29061877-29061877-chr22-3'Flank-DEL-T-T--	0.000200425	ZNRF3	38991521-38991521-chr22-Synonymous-SNP-C-C-T	0.000541164	APOBEC3B
400	CLIP1 Intron	0.000355996	CLIP1	ZNRF3 3325.0 Non_Silent	0.00038362	ZNRF3	FBLN2 Intron	0.000593317	FBLN2	15510255-15510288-chr9-5'UTR-DEL-GCGGGCGGCGGACGCGGGCCCAGCTACCGGGCCC-GCGGGCGGCGGACGCGGGCCCAGCTACCGGGCCC--	0.000471471	PSIP1	PPARG 0.0 Flank	0.000198426	PPARG	BRCA1 Synonymous	0.000538803	BRCA1
401	PTPN6 Intron	0.000355974	PTPN6	29942911-29942911-chr6-Missense_Mutation-SNP-A-A-G	0.000382869	HLA-A	ECT2L Intron	0.000592262	ECT2L	KAT6A UTR	0.000469738	KAT6A	26033582-26033583-chr6-5'Flank-INS-----AGT	0.000196185	HIST1H3B	6458098-6458098-chr11-Synonymous-SNP-G-G-C	0.000535408	TRIM3
402	TFG Intron	0.000355228	TFG	CDKN2A Non_Silent	0.000382796	CDKN2A	CBLC Intron	0.000590193	CBLC	BCL2L1 UTR	0.000469237	BCL2L1	196045068-196045068-chr3-3'Flank-SNP-A-A-G	0.000192794	TFRC	MAP3K13 1488.0 Synonymous	0.00053492	MAP3K13
403	BIRC6 Non_Silent	0.00035438	BIRC6	SPEN 575.0 Non_Silent	0.00038242	SPEN	FCGR2B 203.0 Intron	0.000589991	FCGR2B	COA4 UTR	0.000464998	COA4	GRIN2A 0.0 Flank	0.000190518	GRIN2A	ALK 656.0 Synonymous	0.000534219	ALK
404	BRAF Intron	0.000353774	BRAF	ISX Non_Silent	0.000381268	ISX	ROS1 Intron	0.000589932	ROS1	CCR7 UTR	0.000462043	CCR7	SGK1 Flank	0.000190424	SGK1	RUNX1 Synonymous	0.00053397	RUNX1
405	DDX10 Non_Silent	0.000353528	DDX10	TPR Non_Silent	0.000378664	TPR	ERCC5 Intron	0.000588678	ERCC5	133746439-133746439-chr3-5'UTR-SNP-A-A-G	0.000459981	TF	BCL3 Flank	0.000189509	BCL3	15937835-15937835-chr1-Synonymous-SNP-C-C-G	0.000529904	SPEN
406	STAT5B Intron	0.00035334	STAT5B	POT1 Non_Silent	0.000376864	POT1	NCOA4 Intron	0.000588337	NCOA4	SRGAP3 UTR	0.000459518	SRGAP3	PBRM1 Flank	0.00018778	PBRM1	8886748-8886748-chr19-Synonymous-SNP-G-G-A	0.000528188	MUC16
407	JAK1 Non_Silent	0.000352481	JAK1	8886839-8886839-chr19-Missense_Mutation-SNP-A-A-G	0.000376786	MUC16	TAL1 160.0 Intron	0.00058811	TAL1	CSF3R 4.0 UTR	0.000457724	CSF3R	NTRK1 Flank	0.000185956	NTRK1	100709179-100709179-chr8-Synonymous-SNP-T-T-C	0.000527824	PABPC1
408	ROBO2 Intron	0.000349111	ROBO2	SPEN 1673.0 Non_Silent	0.000376266	SPEN	TNC Intron	0.000587799	TNC	MLH1 UTR	0.000457232	MLH1	68805427-68805427-chr12-5'Flank-SNP-C-C-T	0.000184675	MDM2	POLE Synonymous	0.000527196	POLE
409	KMT2C 2017.0 Intron	0.000347494	KMT2C	ZNRF3 Non_Silent	0.000375573	ZNRF3	APOBEC3B Intron	0.000586687	APOBEC3B	SMAD3 UTR	0.000453703	SMAD3	10026025-10026025-chr3-5'Flank-SNP-A-A-G	0.00018405	FANCD2	PTPRT Synonymous	0.000526678	PTPRT
410	C5 Intron	0.000344793	C5	IL7R Non_Silent	0.000373244	IL7R	JAK1 Intron	0.000585785	JAK1	MAP3K13 UTR	0.000453169	MAP3K13	CRLF2 Flank	0.000184009	CRLF2	CLTCL1 Synonymous	0.000526435	CLTCL1
411	PDE4DIP Intron	0.000342672	PDE4DIP	OMD Non_Silent	0.000372845	OMD	DCAF12 Intron	0.000584228	DCAF12	44253745-44253745-chr6-3'UTR-SNP-T-T-G	0.000450541	HSP90AB1	SPECC1 Flank	0.000183417	SPECC1	112265565-112265565-chr8-Synonymous-SNP-T-T-G	0.000526285	CSMD3
412	MUC16 1175.0 Intron	0.000342595	MUC16	CACNA1D 11.0 Non_Silent	0.000371254	CACNA1D	31096742-31096742-chr8-Intron-SNP-C-C-T	0.000582947	WRN	XPA UTR	0.000447126	XPA	PRDM16 7390.0 Flank	0.000182101	PRDM16	SETBP1 Synonymous	0.00052626	SETBP1
413	SYK Intron	0.000341762	SYK	PABPC1 196.0 Non_Silent	0.000370363	PABPC1	HR Intron	0.000581569	HR	DRG1 3.0 UTR	0.000443261	DRG1	92352265-92352265-chr11-5'Flank-SNP-C-C-A	0.000181418	FAT3	8977467-8977467-chr19-Synonymous-SNP-A-A-G	0.000524461	MUC16
414	CAMTA1 Intron	0.000340021	CAMTA1	SFRP4 Non_Silent	0.000370207	SFRP4	SMARCE1 Intron	0.000579118	SMARCE1	RAP1GDS1 UTR	0.000443241	RAP1GDS1	18683664-18683666-chr19-5'Flank-DEL-GGA-GGA--	0.000180354	CRTC1	ABL2 195.0 Synonymous	0.000522003	ABL2
415	BCL6 Non_Silent	0.000339036	BCL6	PPP6C Non_Silent	0.000368403	PPP6C	80153172-80153176-chr15-Intron-DEL-GGAGT-GGAGT--	0.000578299	FAH	LIF UTR	0.000442866	LIF	B2M 0.0 Flank	0.000179584	B2M	BCL6 Synonymous	0.000513499	BCL6
416	HLA-A UTR	0.000338376	HLA-A	STAT5B Non_Silent	0.000366544	STAT5B	39240895-39240896-chr22-Intron-DEL-TC-TC--	0.000577639	PDGFB	CBLC UTR	0.00044235	CBLC	10025864-10025864-chr3-5'Flank-SNP-G-G-C	0.000178949	FANCD2	MB21D2 Synonymous	0.000512716	MB21D2
417	SDHA 761.0 Intron	0.000338156	SDHA	122328162-122328162-chr12-Missense_Mutation-SNP-C-C-T	0.000366134	CLIP1	HLA-A 30.0 Intron	0.000574767	HLA-A	POLQ UTR	0.000433997	POLQ	PRPF4 0.0 Flank	0.000178067	PRPF4	SF1 49.0 Synonymous	0.000510011	SF1
418	RHOA Non_Silent	0.000338066	RHOA	152273774-152273774-chr7-Missense_Mutation-SNP-C-C-T	0.000363975	KMT2C	WWP2 3384.0 Intron	0.000573065	WWP2	CSF3R UTR	0.000431922	CSF3R	FOXO4 148.0 Flank	0.000177197	FOXO4	FOXA1 Synonymous	0.000509553	FOXA1
419	8886839-8886839-chr19-Missense_Mutation-SNP-A-A-G	0.000337913	MUC16	CR1 Non_Silent	0.000363338	CR1	CNOT3 Intron	0.000570929	CNOT3	PTPN1 UTR	0.000431743	PTPN1	23318581-23318581-chr22-3'Flank-SNP-C-C-T	0.000176552	BCR	SKI Synonymous	0.000506099	SKI
420	CDK12 Non_Silent	0.000337537	CDK12	FLCN Non_Silent	0.000362437	FLCN	STIL Intron	0.000569066	STIL	CCR4 UTR	0.000428583	CCR4	HMGA2 0.0 Flank	0.000171267	HMGA2	ZNRF3 Synonymous	0.000505602	ZNRF3
421	RAD51B Intron	0.000337354	RAD51B	BCLAF1 229.0 Non_Silent	0.000361509	BCLAF1	MSH6 Intron	0.000568543	MSH6	APC 2127.0 UTR	0.000425176	APC	MLLT6 0.0 Flank	0.000170878	MLLT6	PIM1 Synonymous	0.000503747	PIM1
422	PTPRK 5401.0 Intron	0.00033409	PTPRK	CHD7 3555.0 Non_Silent	0.00036066	CHD7	SLC34A2 Intron	0.000565863	SLC34A2	HOXC11 UTR	0.000425065	HOXC11	NSD1 0.0 Flank	0.000170717	NSD1	ERCC2 Synonymous	0.000502924	ERCC2
423	SDHA Synonymous	0.000333852	SDHA	NUTM1 Non_Silent	0.000359759	NUTM1	29197730-29197731-chr2-Intron-DEL-CA-CA--	0.000564391	ALK	DDB2 UTR	0.000424756	DDB2	PTPN6 Flank	0.000169142	PTPN6	KDM5C Synonymous	0.000501498	KDM5C
424	SET 210.0 Intron	0.000333728	SET	MKL1 Non_Silent	0.000359714	MKL1	57099758-57099758-chr12-Intron-SNP-T-T-G	0.000564335	STAT6	RUNX1T1 UTR	0.000424549	RUNX1T1	PRDM16 Flank	0.000168355	PRDM16	MLLT1 Synonymous	0.000501456	MLLT1
425	ESR1 Intron	0.000333347	ESR1	152265205-152265205-chr7-Missense_Mutation-SNP-C-C-G	0.000358535	KMT2C	2055344-2055344-chr16-Intron-SNP-A-A-G	0.000563897	TSC2	CDH1 UTR	0.000421188	CDH1	ZNF429 Flank	0.000165508	ZNF429	ATP2B3 Synonymous	0.000498684	ATP2B3
426	DDR2 Non_Silent	0.000332892	DDR2	MAP3K1 Non_Silent	0.000356564	MAP3K1	49885105-49885106-chr10-Intron-DEL-TC-TC--	0.000563078	PARG	142130807-142130807-chr2-5'UTR-SNP-G-G-C	0.000420295	LRP1B	167976167-167976167-chr6-3'Flank-SNP-C-C-G	0.000165212	MLLT4	MSN Synonymous	0.000498032	MSN
427	BRCA1 Intron	0.000329043	BRCA1	81143379-81143379-chr14-Missense_Mutation-SNP-A-A-C	0.000356281	TSHR	LMO2 Intron	0.000562071	LMO2	TRIM24 2516.0 UTR	0.000416319	TRIM24	190179573-190179573-chr4-3'Flank-SNP-T-T-A	0.000163035	DUX4	ARID2 2426.0 Synonymous	0.000495995	ARID2
428	KDM6A Intron	0.000328904	KDM6A	NFE2L2 79.0 Non_Silent	0.000354673	NFE2L2	152273692-152273692-chr7-Intron-SNP-G-G-A	0.000561577	KMT2C	AFF4 113.0 UTR	0.000416089	AFF4	56712401-56712401-chr12-3'Flank-SNP-T-T-G	0.000158467	NACA	5135261-5135261-chr17-Synonymous-SNP-G-G-C	0.000495048	USP6
429	AKAP9 Non_Silent	0.000326669	AKAP9	CNTNAP2 27394.0 Non_Silent	0.00035428	CNTNAP2	EZH2 Intron	0.000558118	EZH2	USP6 UTR	0.000415617	USP6	C3 Flank	0.000157745	C3	CTNND1 Synonymous	0.000493183	CTNND1
430	ANK1 Non_Silent	0.000325909	ANK1	152411453-152411455-chr4-In_Frame_Del-DEL-CTC-CTC--	0.000352485	FBXW7	STAT5B Intron	0.000557462	STAT5B	BTG1 UTR	0.000407534	BTG1	ZCCHC8 581.0 Flank	0.000153904	ZCCHC8	TAF1 Synonymous	0.000492089	TAF1
431	NCOA1 Intron	0.000324903	NCOA1	75022148-75022150-chr10-In_Frame_Del-DEL-GAA-GAA--	0.000351082	KAT6B	MSN Intron	0.000557175	MSN	MN1 UTR	0.000407341	MN1	NUTM1 Flank	0.000153859	NUTM1	195786336-195786336-chr3-Synonymous-SNP-A-A-G	0.00048809	MUC4
432	152265028-152265028-chr7-Intron-SNP-G-G-T	0.000324221	KMT2C	STAG1 Non_Silent	0.000351009	STAG1	PPFIBP1 Intron	0.000557102	PPFIBP1	BRD3 UTR	0.000406977	BRD3	154398308-154398308-chrX-5'Flank-SNP-A-A-C	0.000152873	RPL10	NKX2-1 Synonymous	0.000487407	NKX2-1
433	102084824-102084826-chr14-In_Frame_Del-DEL-TCT-TCT--	0.000324048	HSP90AA1	PICALM Non_Silent	0.000350882	PICALM	MYO5A Intron	0.000555355	MYO5A	HLA-A 26.0 UTR	0.000404776	HLA-A	CDK12 0.0 Flank	0.000152154	CDK12	CD209 Synonymous	0.000486554	CD209
434	FKBP9 Non_Silent	0.000324033	FKBP9	ROS1 Non_Silent	0.00035086	ROS1	DDR2 Intron	0.000555162	DDR2	BCLAF1 UTR	0.00040169	BCLAF1	HNRNPA2B1 218.0 Flank	0.000151254	HNRNPA2B1	THRAP3 1256.0 Synonymous	0.000486542	THRAP3
435	CREBBP Non_Silent	0.000321243	CREBBP	MSH2 Non_Silent	0.000349512	MSH2	HIP1 Intron	0.000555	HIP1	ERCC2 UTR	0.000399357	ERCC2	GATA3 Flank	0.00014588	GATA3	GATA3 Synonymous	0.000486202	GATA3
436	PC Intron	0.000320286	PC	DCT Non_Silent	0.000348868	DCT	FBXO11 Intron	0.000552383	FBXO11	42049176-42049176-chr8-5'UTR-SNP-A-A-T	0.000398849	KAT6A	ERCC4 0.0 Flank	0.000143006	ERCC4	FST Synonymous	0.000486002	FST
437	COL1A1 Intron	0.000319949	COL1A1	PSIP1 Non_Silent	0.000348091	PSIP1	2945728-2945735-chr7-Intron-DEL-ACACACAC-ACACACAC--	0.000551512	CARD11	OLIG2 18.0 UTR	0.00039681	OLIG2	BCL11A 1928.0 Flank	0.000142751	BCL11A	142613387-142613387-chr8-Synonymous-SNP-G-G-C	0.000485786	ARC
438	50492753-50492753-chr15-Missense_Mutation-SNP-C-C-T	0.000319809	USP8	47269656-47269656-chr1-Missense_Mutation-SNP-T-T-G	0.00034795	STIL	CCDC6 Intron	0.000551494	CCDC6	256509-256509-chr5-3'UTR-SNP-G-G-A	0.000396129	SDHA	50870969-50870969-chr19-5'Flank-SNP-C-C-G	0.000142629	KLK2	72957581-72957581-chr16-Synonymous-SNP-T-T-G	0.000482778	ZFHX3
439	ROBO2 11139.0 Intron	0.000319221	ROBO2	KMT2C 2604.0 Non_Silent	0.000347576	KMT2C	HOOK3 Intron	0.000550223	HOOK3	130005230-130005230-chrX-5'UTR-SNP-T-T-G	0.000395601	BCORL1	121546196-121546196-chr3-5'Flank-SNP-C-C-T	0.000141172	POLQ	SYK 1208.0 Synonymous	0.000481521	SYK
440	CHEK2 Intron	0.000318752	CHEK2	JUN Non_Silent	0.000347529	JUN	SPEN Intron	0.000550131	SPEN	CD27 UTR	0.000387853	CD27	FCGR2B 0.0 Flank	0.000141058	FCGR2B	PABPC1 253.0 Synonymous	0.000478061	PABPC1
441	68645403-68645403-chr10-Missense_Mutation-SNP-G-G-T	0.000318198	TET1	152235905-152235905-chr7-Missense_Mutation-SNP-C-C-T	0.000347357	KMT2C	LMO1 Intron	0.000549138	LMO1	QKI UTR	0.00038588	QKI	USP8 Flank	0.000140933	USP8	BUB1 480.0 Synonymous	0.000477928	BUB1
442	MYH9 Intron	0.000316685	MYH9	TSC2 Non_Silent	0.000347138	TSC2	LRIG3 Intron	0.000548464	LRIG3	LASP1 979.0 UTR	0.000385348	LASP1	HSP90AA1 1174.0 Flank	0.000140556	HSP90AA1	NUTM2A 148.0 Synonymous	0.000477439	NUTM2A
443	TFG Non_Silent	0.000315877	TFG	CAMTA1 Non_Silent	0.00034707	CAMTA1	LCK Intron	0.000545125	LCK	TRIM27 414.0 UTR	0.000380562	TRIM27	IK Flank	0.000139223	IK	PHOX2B Synonymous	0.000475699	PHOX2B
444	TPM3 Intron	0.000314855	TPM3	TSHR 3767.0 Non_Silent	0.000346295	TSHR	121162390-121162391-chr9-Intron-DEL-AT-AT--	0.000544873	CNTRL	LARP4 2.0 UTR	0.000379326	LARP4	FANCE Flank	0.000139071	FANCE	DNMT3A Synonymous	0.000475308	DNMT3A
445	MGA Non_Silent	0.000313441	MGA	CRLF2 Non_Silent	0.000345386	CRLF2	209696505-209696507-chr2-Intron-DEL-TGT-TGT--	0.00054308	MAP2	29945653-29945653-chr6-3'UTR-SNP-C-C-T	0.000378122	HLA-A	MTCP1 Flank	0.000138867	MTCP1	195786603-195786603-chr3-Synonymous-SNP-T-T-G	0.000474135	MUC4
446	CHST1 35.0 Non_Silent	0.000312739	CHST1	CRTC1 Non_Silent	0.00034423	CRTC1	TET1 Intron	0.000541089	TET1	CTCF UTR	0.000376544	CTCF	16076004-16076004-chr19-5'Flank-DEL-C-C--	0.000138026	TPM4	BUB1 Synonymous	0.00047403	BUB1
447	PABPC1 80.0 Non_Silent	0.000312542	PABPC1	T 163.0 Non_Silent	0.000343785	T	PDGFRB Intron	0.000536793	PDGFRB	AMER1 22.0 UTR	0.00037599	AMER1	TEC Flank	0.000137119	TEC	APOBEC3B Synonymous	0.000469434	APOBEC3B
448	CYLD Intron	0.00031049	CYLD	ABL1 1006.0 Non_Silent	0.000342582	ABL1	FKBP9 Intron	0.000535813	FKBP9	SLC34A2 UTR	0.000375043	SLC34A2	FEV 93.0 Flank	0.000137112	FEV	132897169-132897169-chr5-Synonymous-SNP-T-T-G	0.000468533	AFF4
449	TET1 Intron	0.000310223	TET1	ATR Non_Silent	0.000340997	ATR	NUP98 Intron	0.000535512	NUP98	CCDC6 78.0 UTR	0.000373455	CCDC6	MLLT6 Flank	0.000136606	MLLT6	C3 Synonymous	0.000468063	C3
450	SLC34A2 206.0 Intron	0.000309944	SLC34A2	7673537-7673537-chr17-Nonsense_Mutation-SNP-G-G-A	0.000337754	TP53	PIK3R1 Intron	0.000535188	PIK3R1	TP63 1.0 UTR	0.000372814	TP63	10738730-10738730-chr22-5'Flank-SNP-G-G-C	0.000135551	U2	90887877-90887877-chr9-Synonymous-SNP-G-G-A	0.000464811	SYK
451	53453081-53453082-chr4-Frame_Shift_Del-DEL-AG-AG--	0.000308151	FIP1L1	KMT2D 306.0 Non_Silent	0.000334677	KMT2D	CTNNB1 Intron	0.000534886	CTNNB1	29945531-29945532-chr6-3'UTR-INS-----C	0.000371701	HLA-A	190179603-190179603-chr4-3'Flank-SNP-A-A-G	0.000135089	DUX4	PTPRB Synonymous	0.000464622	PTPRB
452	MET Intron	0.00030644	MET	NTRK3 Non_Silent	0.000334596	NTRK3	POU2AF1 Intron	0.000534129	POU2AF1	NOTCH2 3158.0 UTR	0.000371302	NOTCH2	FUS Flank	0.000134403	FUS	77558011-77558011-chr3-Synonymous-SNP-T-T-G	0.000464439	ROBO2
453	BRCA1 933.0 Intron	0.000305942	BRCA1	CREBBP 912.0 Non_Silent	0.000331735	CREBBP	77596796-77596798-chr3-Intron-DEL-TTT-TTT--	0.000533764	ROBO2	DNAJB1 UTR	0.000368615	DNAJB1	NUP98 Flank	0.000134096	NUP98	JAK3 Synonymous	0.000464091	JAK3
454	MGA 171.0 Synonymous	0.000305074	MGA	NT5C2 34.0 Non_Silent	0.000331302	NT5C2	DDX1 287.0 Intron	0.000533616	DDX1	29945567-29945567-chr6-3'UTR-SNP-G-G-C	0.00036581	HLA-A	CRLF2 503.0 Flank	0.000133356	CRLF2	PIM1 22.0 Synonymous	0.000460662	PIM1
455	TF Intron	0.000304907	TF	ERBB4 Non_Silent	0.000330946	ERBB4	10049351-10049351-chr3-Intron-SNP-T-T-C	0.000533568	FANCD2	ATRX UTR	0.000364768	ATRX	BCL11B Flank	0.000132833	BCL11B	DDX5 85.0 Synonymous	0.000460124	DDX5
456	HOXA13 Non_Silent	0.000304846	HOXA13	152248140-152248140-chr7-Missense_Mutation-SNP-T-T-C	0.00032953	KMT2C	EML4 3125.0 Intron	0.00053218	EML4	LCP1 UTR	0.000363726	LCP1	283138-283138-chr16-3'Flank-SNP-T-T-C	0.000130925	AXIN1	ATRX Synonymous	0.000459675	ATRX
457	MTOR Non_Silent	0.00030446	MTOR	MYH11 Non_Silent	0.000327911	MYH11	CSF3R 186.0 Intron	0.000531504	CSF3R	HR UTR	0.000362444	HR	CDC73 0.0 Flank	0.00012771	CDC73	CDKN2A Synonymous	0.000458407	CDKN2A
458	ATRX Intron	0.000303899	ATRX	DNM2 Non_Silent	0.000327695	DNM2	PAX8 Intron	0.000530686	PAX8	EZR 23.0 UTR	0.000362438	EZR	DDX6 0.0 Flank	0.000127575	DDX6	TFRC Synonymous	0.000457918	TFRC
459	SDHA UTR	0.000303692	SDHA	HOXC13 Non_Silent	0.00032743	HOXC13	NCOA2 Intron	0.000529666	NCOA2	BIRC3 UTR	0.00036125	BIRC3	118981371-118981371-chr11-3'Flank-SNP-A-A-G	0.00012711	FOXR1	ATM Synonymous	0.000457449	ATM
460	MECOM Intron	0.000302649	MECOM	41940902-41940904-chr8-In_Frame_Del-DEL-CTC-CTC--	0.000327247	KAT6A	FANCA Intron	0.000529359	FANCA	XPO1 UTR	0.00036084	XPO1	RCC2 599.0 Flank	0.000127034	RCC2	AK2 475.0 Synonymous	0.000456111	AK2
461	KMT2C 2606.0 Non_Silent	0.000302399	KMT2C	MYCN Non_Silent	0.000325656	MYCN	ETV1 1878.0 Intron	0.000528987	ETV1	63128464-63128465-chr18-3'UTR-DEL-TG-TG--	0.000360139	BCL2	21003336-21003338-chr22-3'Flank-DEL-GAC-GAC--	0.000126299	LZTR1	GRIN2A Synonymous	0.000455448	GRIN2A
462	VTI1A Intron	0.000302188	VTI1A	FANCD2 Non_Silent	0.000324933	FANCD2	PRKCB Intron	0.000527008	PRKCB	ESR1 UTR	0.000358248	ESR1	TAF1 0.0 Flank	0.000125154	TAF1	KMT2C 2262.0 Synonymous	0.0004514	KMT2C
463	6581704-6581704-chr12-Synonymous-SNP-T-T-G	0.000302178	CHD4	106425156-106425156-chr2-Missense_Mutation-SNP-A-A-C	0.000324759	RGPD3	180620740-180620741-chr5-Intron-DEL-GT-GT--	0.000526615	FLT4	COA1 UTR	0.000356852	COA1	NOTCH2 Flank	0.000125128	NOTCH2	PABPC1 204.0 Synonymous	0.000451379	PABPC1
464	NCOA4 Non_Silent	0.000301508	NCOA4	HIP1 Non_Silent	0.000323442	HIP1	CDH11 Intron	0.000525924	CDH11	RAD21 UTR	0.000356319	RAD21	TNF 0.0 Flank	0.000124484	TNF	29944153-29944153-chr6-Synonymous-SNP-C-C-T	0.000450158	HLA-A
465	HLA-A 58.0 Non_Silent	0.000299899	HLA-A	MUC16 944.0 Non_Silent	0.000323237	MUC16	RANBP2 Intron	0.000525575	RANBP2	FAS UTR	0.000355136	FAS	176107240-176107240-chr2-5'Flank-SNP-G-G-T	0.000124286	HOXD11	152248228-152248228-chr7-Synonymous-SNP-A-A-G	0.000448284	KMT2C
466	PRKCB Intron	0.000299567	PRKCB	122328152-122328152-chr12-Missense_Mutation-SNP-A-A-C	0.000322682	CLIP1	CARS Intron	0.000524952	CARS	ELF3 UTR	0.000354182	ELF3	190179704-190179704-chr4-3'Flank-SNP-T-T-C	0.000123899	DUX4	ARID2 Synonymous	0.000446874	ARID2
467	AFF3 Intron	0.000299195	AFF3	FCGR2B 197.0 Non_Silent	0.000319512	FCGR2B	10046539-10046539-chr3-Intron-SNP-T-T-G	0.000522865	FANCD2	256547-256547-chr5-3'UTR-SNP-A-A-G	0.000353698	SDHA	CIC 224.0 Flank	0.000122958	CIC	ARHGAP26 Synonymous	0.000445079	ARHGAP26
468	ATP2B3 Intron	0.000298227	ATP2B3	FNBP1 Non_Silent	0.000318598	FNBP1	UTY Intron	0.000521931	UTY	PDGFB UTR	0.00035311	PDGFB	EIF4A2 Flank	0.000119297	EIF4A2	BRIP1 Synonymous	0.000444137	BRIP1
469	KMT2C 2264.0 Synonymous	0.0002979	KMT2C	PABPC1 127.0 Non_Silent	0.000318437	PABPC1	ZNRF3 Intron	0.000521621	ZNRF3	COL3A1 UTR	0.000351191	COL3A1	MAP2K4 Flank	0.000118821	MAP2K4	3731416-3731416-chr11-Synonymous-SNP-G-G-A	0.000442818	NUP98
470	KMT2C 2776.0 Intron	0.00029767	KMT2C	APOBEC3B Non_Silent	0.000316265	APOBEC3B	STAT6 Intron	0.000520387	STAT6	PAFAH1B2 UTR	0.00035096	PAFAH1B2	MYH11 0.0 Flank	0.00011743	MYH11	AXIN1 Synonymous	0.000442045	AXIN1
471	CBL 1453.0 Non_Silent	0.000297636	CBL	6602041-6602043-chr12-In_Frame_Del-DEL-CTT-CTT--	0.000315757	CHD4	THRAP3 Intron	0.000520093	THRAP3	FUBP1 UTR	0.000348777	FUBP1	NFIB 4644.0 Flank	0.000116367	NFIB	KLF4 Synonymous	0.0004358	KLF4
472	BCR Non_Silent	0.000297162	BCR	49033483-49033485-chr12-In_Frame_Del-DEL-TGC-TGC--	0.000314925	KMT2D	EIF1AX Intron	0.000516619	EIF1AX	35856954-35856955-chr5-5'UTR-DEL-CT-CT--	0.000347868	IL7R	161379107-161379107-chr1-3'Flank-SNP-T-T-A	0.000116082	SDHC	DICER1 Synonymous	0.000435779	DICER1
473	WRN Intron	0.000295916	WRN	SMARCA4 Non_Silent	0.00031316	SMARCA4	15605924-15605925-chr2-Intron-DEL-TC-TC--	0.000516604	DDX1	BMP5 36.0 UTR	0.0003475	BMP5	SEPT5 0.0 Flank	0.000115319	SEPT5	ARHGEF12 Synonymous	0.000435311	ARHGEF12
474	SLC45A3 Non_Silent	0.000295648	SLC45A3	LRP1 949.0 Non_Silent	0.000312878	LRP1	EGFR 3646.0 Intron	0.000516172	EGFR	CSF1 UTR	0.000343132	CSF1	MED1 Flank	0.00011513	MED1	ARHGAP5 Synonymous	0.00043415	ARHGAP5
475	ARHGEF1 Intron	0.000295586	ARHGEF1	P2RY8 Non_Silent	0.000312699	P2RY8	CDH17 Intron	0.000514695	CDH17	NOTCH2 UTR	0.000343005	NOTCH2	RALGDS Flank	0.000114926	RALGDS	169115580-169115580-chr3-Synonymous-SNP-T-T-G	0.000432059	MECOM
476	CLTC Non_Silent	0.000295388	CLTC	119278646-119278648-chr11-In_Frame_Del-DEL-ATG-ATG--	0.000312576	CBL	TERT 145.0 Intron	0.000511632	TERT	MAF 112.0 UTR	0.00034193	MAF	HOXA1 Flank	0.000114793	HOXA1	10046582-10046582-chr3-Splice_Region-SNP-G-G-T	0.000431046	FANCD2
477	RGPD3 1041.0 Non_Silent	0.000294804	RGPD3	100709705-100709705-chr8-Frame_Shift_Del-DEL-T-T--	0.000311827	PABPC1	JAK3 Intron	0.000511442	JAK3	79599909-79599911-chr16-5'UTR-DEL-GCC-GCC--	0.000341097	MAF	283146-283146-chr16-3'Flank-SNP-C-C-T	0.000113764	AXIN1	FLNA Synonymous	0.000429061	FLNA
478	CNOT3 Intron	0.000294071	CNOT3	MED12 442.0 Non_Silent	0.000311167	MED12	192917586-192917587-chr3-Intron-DEL-CA-CA--	0.000510928	MB21D2	26475245-26475245-chr1-3'UTR-SNP-A-A-T	0.000340981	HMGN2	DAXX Flank	0.000111479	DAXX	LAT Synonymous	0.000428139	LAT
479	SPEN 1673.0 Non_Silent	0.000293861	SPEN	TRRAP Non_Silent	0.000306799	TRRAP	KIT Intron	0.000510352	KIT	LMNA UTR	0.000340743	LMNA	33010834-33010834-chr1-3'Flank-SNP-C-C-A	0.000109364	AK2	ARC Synonymous	0.0004273	ARC
480	CIC Intron	0.000293199	CIC	MED12 443.0 Non_Silent	0.000305079	MED12	PTPN13 Intron	0.000508254	PTPN13	IRF4 319.0 UTR	0.000340613	IRF4	36674483-36674483-chr6-5'Flank-SNP-C-C-T	0.000108087	CDKN1A	FCRL4 Synonymous	0.000425786	FCRL4
481	TRIM2 Synonymous	0.000292907	TRIM2	MED1 Non_Silent	0.00030404	MED1	BUB1 Intron	0.000507523	BUB1	GOPC UTR	0.000338379	GOPC	36674413-36674413-chr6-5'Flank-SNP-A-A-G	0.000107446	CDKN1A	MYH9 Synonymous	0.000421705	MYH9
482	CTNNB1 744.0 Non_Silent	0.000292581	CTNNB1	PTPN13 Non_Silent	0.000303865	PTPN13	FUS 195.0 Intron	0.000506846	FUS	PTEN UTR	0.000338105	PTEN	PPP6C 866.0 Flank	0.00010646	PPP6C	131197223-131197223-chr9-Synonymous-SNP-A-A-C	0.000420962	NUP214
483	TPR Non_Silent	0.000291469	TPR	PTK6 Non_Silent	0.000303837	PTK6	PAX5 1801.0 Intron	0.000505288	PAX5	TG UTR	0.000333341	TG	8050720-8050720-chr10-5'Flank-SNP-T-T-C	0.000106071	GATA3	TMPRSS2 78.0 Synonymous	0.000420816	TMPRSS2
484	BIRC6 2850.0 Intron	0.000290356	BIRC6	TET1 Non_Silent	0.000302958	TET1	ATRX Intron	0.000505178	ATRX	ETV6 UTR	0.000333021	ETV6	C5 1960.0 Flank	0.000104616	C5	29943462-29943462-chr6-Synonymous-SNP-T-T-C	0.000420708	HLA-A
485	CAMTA1 Non_Silent	0.000289331	CAMTA1	COL3A1 Non_Silent	0.000302385	COL3A1	IKBKB Intron	0.000502069	IKBKB	BUB1B 2.0 UTR	0.000332636	BUB1B	VAV1 1689.0 Flank	0.000104114	VAV1	47280934-47280934-chr1-Synonymous-SNP-T-T-G	0.000419771	STIL
486	CCDC6 Intron	0.00028912	CCDC6	DICER1 Non_Silent	0.000301587	DICER1	SMAD2 Intron	0.000501409	SMAD2	CHD2 UTR	0.000331615	CHD2	6664594-6664594-chr12-3'Flank-SNP-G-G-T	0.000103732	ZNF384	IRS4 Synonymous	0.000419249	IRS4
487	50492758-50492758-chr15-Missense_Mutation-SNP-C-C-A	0.000289058	USP8	ARHGEF1 Non_Silent	0.000301233	ARHGEF1	DDB2 Intron	0.000499477	DDB2	NUTM2A UTR	0.000330541	NUTM2A	FBL Flank	0.000103214	FBL	HSP90AA1 Synonymous	0.000417757	HSP90AA1
488	41940656-41940657-chr8-Intron-DEL-AC-AC--	0.000288718	KAT6A	APC Non_Silent	0.000300984	APC	PDGFRB 405.0 Intron	0.000499032	PDGFRB	SYK UTR	0.000328857	SYK	ERCC2 417.0 Flank	0.000101835	ERCC2	33013382-33013382-chr1-Synonymous-SNP-G-G-A	0.000416322	AK2
489	TNC Intron	0.000288612	TNC	PDGFRB Non_Silent	0.000300936	PDGFRB	TRIM33 Intron	0.000498874	TRIM33	MLLT3 UTR	0.000320461	MLLT3	SUFU 0.0 Flank	0.000101394	SUFU	PARG 2278.0 Synonymous	0.000415744	PARG
490	TP63 Intron	0.000288529	TP63	SIRPA 410.0 Non_Silent	0.000300478	SIRPA	CTNNB1 555.0 Intron	0.000494002	CTNNB1	GPHN UTR	0.000320439	GPHN	16075962-16075962-chr19-5'Flank-SNP-G-G-A	0.000100758	TPM4	LPP Synonymous	0.00041435	LPP
491	EGF Intron	0.000288274	EGF	ARHGAP5 Non_Silent	0.000299434	ARHGAP5	WWP2 Intron	0.000493474	WWP2	BCL2 UTR	0.000319253	BCL2	ABI1 2288.0 Flank	0.000100016	ABI1	FAH Synonymous	0.00041098	FAH
492	SRGAP3 101.0 Non_Silent	0.00028821	SRGAP3	92883322-92883322-chr11-Missense_Mutation-SNP-T-T-C	0.000298238	FAT3	ASPSCR1 Intron	0.000493364	ASPSCR1	LSM14A UTR	0.000317388	LSM14A	A1CF 1070.0 Flank	9.94231e-05	A1CF	77508435-77508435-chrX-Synonymous-SNP-A-A-C	0.000408508	ATRX
493	CLIP1 Non_Silent	0.000287978	CLIP1	FBLN2 Non_Silent	0.000297766	FBLN2	CHD4 219.0 Intron	0.000492875	CHD4	LMO2 UTR	0.000316041	LMO2	36520214-36520214-chr14-5'Flank-SNP-C-C-A	9.92322e-05	NKX2-1	29942830-29942830-chr6-Synonymous-SNP-G-G-C	0.000407513	HLA-A
494	FAT1 Non_Silent	0.000287598	FAT1	MYH9 393.0 Non_Silent	0.00029704	MYH9	GRIN2A Intron	0.00049286	GRIN2A	BMP5 UTR	0.000315483	BMP5	LZTR1 Flank	9.83994e-05	LZTR1	ARID1B Synonymous	0.000406085	ARID1B
495	CLIP1 1107.0 Synonymous	0.000286799	CLIP1	PML Non_Silent	0.000296218	PML	KMT2C 2774.0 Intron	0.000492631	KMT2C	CTNNA2 UTR	0.000313295	CTNNA2	ZMYM3 0.0 Flank	9.53906e-05	ZMYM3	MYH1 Synonymous	0.000405221	MYH1
496	KMT2C 2018.0 Intron	0.000286768	KMT2C	122328146-122328146-chr12-Missense_Mutation-SNP-G-G-T	0.000295595	CLIP1	CARD11 414.0 Intron	0.000492543	CARD11	JAK1 UTR	0.000312688	JAK1	PPFIBP1 3429.0 Flank	9.52376e-05	PPFIBP1	MTOR Synonymous	0.000401918	MTOR
497	TRIM3 Non_Silent	0.000285363	TRIM3	100709499-100709499-chr8-Missense_Mutation-SNP-G-G-A	0.000295544	PABPC1	USP8 Intron	0.000491969	USP8	41688984-41688986-chr17-5'UTR-DEL-CCG-CCG--	0.000312132	EIF1	CAMTA1 19689.0 Flank	9.52049e-05	CAMTA1	118900770-118900770-chr11-Synonymous-SNP-C-C-G	0.000401038	BCL9L
498	CNTRL Intron	0.000284547	CNTRL	CTNNA2 Non_Silent	0.000291557	CTNNA2	15264811-15264811-chr19-Intron-SNP-C-C-G	0.000491382	BRD4	SMAD4 UTR	0.000309926	SMAD4	167825843-167825843-chr6-5'Flank-SNP-C-C-T	9.43157e-05	MLLT4	BRCA2 Synonymous	0.000398413	BRCA2
499	CHD2 Non_Silent	0.000284442	CHD2	CSF1R Non_Silent	0.000290517	CSF1R	DICER1 Intron	0.000490671	DICER1	FLNA UTR	0.000304945	FLNA	ZCCHC8 Flank	9.34284e-05	ZCCHC8	MSH6 451.0 Synonymous	0.000397324	MSH6
500	PARG 1337.0 Intron	0.000284436	PARG	LSM14A Non_Silent	0.000290149	LSM14A	DNMT3A Intron	0.000490131	DNMT3A	CDH1 1927.0 UTR	0.000300367	CDH1	KAT6B Flank	9.29168e-05	KAT6B	CSMD3 853.0 Synonymous	0.000396381	CSMD3
501	PDE4DIP Non_Silent	0.000284208	PDE4DIP	ABI1 103.0 Non_Silent	0.000287637	ABI1	50782526-50782527-chr16-Intron-DEL-GT-GT--	0.000489323	CYLD	CNTRL UTR	0.000299866	CNTRL	NACA 0.0 Flank	9.22646e-05	NACA	TNC Synonymous	0.000395735	TNC
502	SDHB Intron	0.000283973	SDHB	COL1A1 68.0 Non_Silent	0.000286434	COL1A1	2945728-2945731-chr7-Intron-DEL-ACAC-ACAC--	0.000486359	CARD11	SMAD3 6.0 UTR	0.000297443	SMAD3	190179578-190179578-chr4-3'Flank-SNP-A-A-G	9.11701e-05	DUX4	DCT Synonymous	0.000394727	DCT
503	2945728-2945733-chr7-Intron-DEL-ACACAC-ACACAC--	0.000283744	CARD11	SP8 Non_Silent	0.000285148	SP8	ETV1 Intron	0.000485917	ETV1	ETV5 UTR	0.00029099	ETV5	196044854-196044854-chr3-3'Flank-SNP-T-T-C	9.10824e-05	TFRC	MAML2 Synonymous	0.000393138	MAML2
504	PC 49.0 Intron	0.000283723	PC	NOTCH1 42.0 Non_Silent	0.000283488	NOTCH1	31189856-31189856-chr16-Intron-SNP-C-C-A	0.000483996	FUS	ABI1 UTR	0.000287742	ABI1	IL21 170.0 Flank	8.90158e-05	IL21	PAX7 Synonymous	0.00039297	PAX7
505	108688937-108688937-chr11-Missense_Mutation-SNP-A-A-C	0.000282562	DDX10	POU5F1 Non_Silent	0.000282945	POU5F1	52648314-52648316-chr3-Intron-DEL-AAC-AAC--	0.000483848	PBRM1	54022277-54022279-chr8-5'UTR-DEL-GCG-GCG--	0.000286708	TCEA1	106470871-106470871-chr2-5'Flank-SNP-C-C-T	8.88851e-05	RGPD3	PF4 4.0 Synonymous	0.000391574	PF4
506	PDE4D 611.0 Intron	0.000282129	PDE4D	F12 Non_Silent	0.000282693	F12	TEC Intron	0.000483494	TEC	ASPSCR1 UTR	0.00028638	ASPSCR1	PDCD1 0.0 Flank	8.66854e-05	PDCD1	152248016-152248016-chr7-Synonymous-SNP-G-G-C	0.000389516	KMT2C
507	CASC5 Non_Silent	0.000281616	CASC5	TBL1X Non_Silent	0.00028262	TBL1X	FANCD2 409.0 Intron	0.000482293	FANCD2	PTPRK UTR	0.000285091	PTPRK	DROSHA Flank	8.40804e-05	DROSHA	NFE2 Synonymous	0.000389305	NFE2
508	AFF4 Intron	0.00028144	AFF4	DDX5 Non_Silent	0.000280702	DDX5	PDGFB 351.0 Intron	0.000481898	PDGFB	GMPS UTR	0.000284274	GMPS	NCOA4 514.0 Flank	8.39885e-05	NCOA4	MUC4 837.0 Synonymous	0.000388364	MUC4
509	MSH6 448.0 Intron	0.000280633	MSH6	CCNE1 Non_Silent	0.000280206	CCNE1	DRG1 Intron	0.000479397	DRG1	FST 114.0 UTR	0.000282874	FST	UBP1 0.0 Flank	8.37396e-05	UBP1	MLLT6 Synonymous	0.000387149	MLLT6
510	SDHA 765.0 UTR	0.000280478	SDHA	TSC1 106.0 Non_Silent	0.000278474	TSC1	UBP1 Intron	0.000479354	UBP1	ANK1 UTR	0.000280472	ANK1	7751197-7751197-chr19-5'Flank-DEL-A-A--	8.36876e-05	CD209	CDH11 Synonymous	0.000386913	CDH11
511	1295113-1295113-chr5-5'Flank-SNP-G-G-A	0.000280252	TERT	IK Non_Silent	0.000277872	IK	114398011-114398013-chr1-Intron-DEL-AAA-AAA--	0.000479264	TRIM33	NUTM1 UTR	0.000279231	NUTM1	SRC 458.0 Flank	8.29073e-05	SRC	NCOA2 Synonymous	0.000385165	NCOA2
512	CASC5 Intron	0.000280143	CASC5	50492819-50492819-chr15-Missense_Mutation-SNP-A-A-G	0.000277401	USP8	100744808-100744809-chr3-Intron-DEL-TG-TG--	0.000479077	TFG	NTRK3 UTR	0.000279016	NTRK3	RLF 0.0 Flank	8.2568e-05	RLF	BRCA2 492.0 Synonymous	0.000384479	BRCA2
513	EED 482.0 Intron	0.000279327	EED	PRCC Non_Silent	0.000276939	PRCC	ARID2 3275.0 Intron	0.000477584	ARID2	TAF15 UTR	0.000277986	TAF15	GNA11 593.0 Flank	8.08587e-05	GNA11	50492761-50492761-chr15-Synonymous-SNP-C-C-A	0.00038419	USP8
514	33010831-33010832-chr1-3'Flank-INS-----GGATGT	0.000279196	AK2	103089679-103089681-chr10-In_Frame_Del-DEL-TCC-TCC--	0.000274372	NT5C2	TMPRSS2 Intron	0.000475854	TMPRSS2	AXIN1 9.0 UTR	0.000276565	AXIN1	PTPN6 202.0 Flank	8.0451e-05	PTPN6	100715568-100715568-chr8-Synonymous-SNP-T-T-C	0.000381276	PABPC1
515	PRKCB Non_Silent	0.000278092	PRKCB	PDE4DIP 2311.0 Non_Silent	0.000274183	PDE4DIP	CARD11 121.0 Intron	0.000473617	CARD11	C6 UTR	0.000276499	C6	CER1 Flank	8.03776e-05	CER1	MUC16 1234.0 Synonymous	0.000380305	MUC16
516	IDH1 Non_Silent	0.000277642	IDH1	NAB2 Non_Silent	0.000274051	NAB2	WNK2 Intron	0.000471971	WNK2	FGFR3 UTR	0.000275857	FGFR3	2565214-2565214-chr1-3'Flank-SNP-A-A-G	8.0108e-05	TNFRSF14	ATR Synonymous	0.000378772	ATR
517	MYC 48.0 Non_Silent	0.000277297	MYC	TRAF7 Non_Silent	0.000271319	TRAF7	FOXP1 Intron	0.000470434	FOXP1	HLA-A 85.0 UTR	0.000275486	HLA-A	18033841-18033841-chr8-3'Flank-DEL-A-A--	7.99827e-05	PCM1	CDH10 Synonymous	0.000378567	CDH10
518	SDHA 367.0 Non_Silent	0.000276019	SDHA	BCL11B Non_Silent	0.000270176	BCL11B	TCF7L2 4046.0 Intron	0.000466998	TCF7L2	TPM3 UTR	0.000273397	TPM3	PLCG1 Flank	7.99392e-05	PLCG1	COL3A1 Synonymous	0.000377709	COL3A1
519	TCF7L2 Intron	0.000275863	TCF7L2	PABPC1 198.0 Non_Silent	0.000269821	PABPC1	KMT2C 1013.0 Intron	0.000465658	KMT2C	47808534-47808534-chr2-3'UTR-SNP-A-A-G	0.000273066	MSH6	TFEB 1023.0 Flank	7.93112e-05	TFEB	RSF1 Synonymous	0.000377635	RSF1
520	KMT2D Synonymous	0.000275421	KMT2D	KMT2C 2020.0 Non_Silent	0.000269062	KMT2C	MED12 Intron	0.000464439	MED12	ASXL1 UTR	0.000272472	ASXL1	WWTR1 0.0 Flank	7.89581e-05	WWTR1	VAV1 Synonymous	0.00037638	VAV1
521	SPEN Intron	0.000274534	SPEN	LAT 30.0 Non_Silent	0.000266671	LAT	131164195-131164196-chr9-Intron-DEL-GT-GT--	0.000463824	NUP214	193122198-193122198-chr1-5'UTR-SNP-A-A-G	0.000269109	CDC73	PTK6 189.0 Flank	7.78637e-05	PTK6	8896026-8896026-chr19-Synonymous-SNP-C-C-T	0.000373966	MUC16
522	72788520-72788520-chr16-Missense_Mutation-SNP-T-T-G	0.000274159	ZFHX3	POLQ Non_Silent	0.000266567	POLQ	100007026-100007028-chr2-Intron-DEL-GAA-GAA--	0.000462931	AFF3	29942517-29942517-chr6-5'UTR-SNP-C-C-A	0.000268413	HLA-A	F12 150.0 Flank	7.72061e-05	F12	73981273-73981273-chr4-Synonymous-SNP-T-T-C	0.00037329	PF4
523	118903196-118903197-chr11-Intron-DEL-AG-AG--	0.000273989	BCL9L	KAT6A 229.0 Non_Silent	0.000265688	KAT6A	10064529-10064529-chr3-Intron-SNP-A-A-G	0.000461451	FANCD2	FAS 3.0 UTR	0.000268277	FAS	DRG1 Flank	7.63444e-05	DRG1	ALDH2 Synonymous	0.000370034	ALDH2
524	MUC16 947.0 Intron	0.000273862	MUC16	KMT2C 2779.0 Non_Silent	0.000265583	KMT2C	KMT2C 2603.0 Intron	0.000461061	KMT2C	DNMT3A UTR	0.000263265	DNMT3A	ARNT 1343.0 Flank	7.39191e-05	ARNT	PABPC1 42.0 Synonymous	0.000368834	PABPC1
525	AKT1 Intron	0.000272703	AKT1	KMT2C 1901.0 Non_Silent	0.000265524	KMT2C	PRKAR1A Intron	0.000460399	PRKAR1A	ARHGAP5 UTR	0.00026326	ARHGAP5	BTK Flank	7.36729e-05	BTK	FOXO3 2082.0 Synonymous	0.000366218	FOXO3
526	SMARCA4 Intron	0.000271297	SMARCA4	100704992-100704992-chr8-Missense_Mutation-SNP-C-C-T	0.000263396	PABPC1	CDK12 Intron	0.000459068	CDK12	29942488-29942488-chr6-5'UTR-SNP-G-G-A	0.000260868	HLA-A	196044851-196044851-chr3-3'Flank-SNP-G-G-A	7.34018e-05	TFRC	GLI1 Synonymous	0.000366137	GLI1
527	PPFIBP1 2520.0 Intron	0.000271242	PPFIBP1	PTCH1 Non_Silent	0.000263367	PTCH1	NRG1 1994.0 Intron	0.000458334	NRG1	CD79B 7.0 UTR	0.000258143	CD79B	CLTC 1531.0 Flank	7.28267e-05	CLTC	152156320-152156320-chr7-Synonymous-SNP-T-T-G	0.000365755	KMT2C
528	NTRK3 Non_Silent	0.000270041	NTRK3	LZTR1 Non_Silent	0.000262943	LZTR1	NOTCH2 Intron	0.000458316	NOTCH2	RSPO3 UTR	0.000255527	RSPO3	ATR Flank	7.19961e-05	ATR	8886778-8886778-chr19-Synonymous-SNP-G-G-A	0.000363393	MUC16
529	DEK Intron	0.000269425	DEK	KMT2C 1049.0 Non_Silent	0.000260624	KMT2C	THRA Intron	0.000457857	THRA	SMARCE1 UTR	0.000254528	SMARCE1	65501009-65501010-chr11-3'Flank-DEL-TT-TT--	7.17166e-05	MALAT1	KMT2C 2604.0 Synonymous	0.000362553	KMT2C
530	EGFR Intron	0.000269287	EGFR	MUT Non_Silent	0.000260557	MUT	NACA Intron	0.000456559	NACA	142614320-142614320-chr8-5'UTR-SNP-G-G-C	0.000254126	ARC	RHO Flank	6.99261e-05	RHO	C5 Synonymous	0.000360324	C5
531	KMT2C 2077.0 Synonymous	0.000267982	KMT2C	AK2 8.0 Non_Silent	0.000260431	AK2	DNM2 Intron	0.000455588	DNM2	ID3 31.0 UTR	0.000253145	ID3	167826115-167826115-chr6-5'Flank-SNP-G-G-C	6.96189e-05	MLLT4	28695853-28695853-chr22-Synonymous-SNP-G-G-A	0.000357016	CHEK2
532	60553287-60553289-chr2-5'UTR-DEL-GGC-GGC--	0.000267277	BCL11A	47171068-47171070-chrX-In_Frame_Del-DEL-GGC-GGC--	0.000259459	RBM10	PDGFRA Intron	0.000455245	PDGFRA	TF UTR	0.000250666	TF	BCR 0.0 Flank	6.91471e-05	BCR	147918551-147918551-chr2-Synonymous-SNP-A-A-C	0.000355389	ACVR2A
533	SUFU Intron	0.00026684	SUFU	TCF12 Non_Silent	0.000258395	TCF12	222293706-222293707-chr2-Intron-DEL-CT-CT--	0.000455156	PAX3	PCBP1 UTR	0.000250488	PCBP1	35916184-35916184-chr17-3'Flank-SNP-C-C-T	6.87926e-05	RDM1	KAT6B Synonymous	0.000354068	KAT6B
534	ITK Intron	0.000266784	ITK	MET Non_Silent	0.00025811	MET	FANCD2 436.0 Intron	0.000450954	FANCD2	FOXL2 UTR	0.000249967	FOXL2	36674391-36674391-chr6-5'Flank-SNP-C-C-T	6.8274e-05	CDKN1A	DNM2 Synonymous	0.000353131	DNM2
535	CACNA1D 11.0 Non_Silent	0.000266733	CACNA1D	152235864-152235864-chr7-Missense_Mutation-SNP-C-C-A	0.000257982	KMT2C	41227186-41227187-chr3-Intron-DEL-AT-AT--	0.000449692	CTNNB1	CD209 31.0 UTR	0.00024655	CD209	NFE2L2 Flank	6.55647e-05	NFE2L2	ZNF521 Synonymous	0.000352177	ZNF521
536	FES Intron	0.000265873	FES	ARID1A 1692.0 Non_Silent	0.000257502	ARID1A	NUMA1 Intron	0.000447416	NUMA1	HIP1 95.0 UTR	0.000246324	HIP1	TCP1 Flank	6.53659e-05	TCP1	ACVR2A Synonymous	0.000351576	ACVR2A
537	STAT6 Intron	0.000265839	STAT6	125415028-125415028-chr4-Missense_Mutation-SNP-A-A-C	0.000256247	FAT4	A1CF 711.0 Intron	0.000447195	A1CF	1807384-1807385-chr4-3'UTR-DEL-TG-TG--	0.000245796	FGFR3	36674008-36674008-chr6-5'Flank-SNP-C-C-T	6.42684e-05	CDKN1A	92883335-92883335-chr11-Synonymous-SNP-A-A-C	0.000350857	FAT3
538	CARD11 793.0 Intron	0.000265579	CARD11	ZNF479 Non_Silent	0.000255733	ZNF479	ALK 595.0 Intron	0.000444783	ALK	ETNK1 UTR	0.000243584	ETNK1	ARNT 0.0 Flank	6.11726e-05	ARNT	29942800-29942800-chr6-Synonymous-SNP-C-C-T	0.00035065	HLA-A
539	EPHA7 Intron	0.000265541	EPHA7	BRD4 Non_Silent	0.000253127	BRD4	PMS2 Intron	0.000444395	PMS2	PHOX2B 34.0 UTR	0.000242923	PHOX2B	167826687-167826687-chr6-5'Flank-SNP-C-C-A	6.00819e-05	MLLT4	KMT2C 428.0 Synonymous	0.000349291	KMT2C
540	PPFIBP1 Intron	0.000265431	PPFIBP1	92883319-92883319-chr11-Missense_Mutation-SNP-A-A-C	0.000252491	FAT3	HLA-A 37.0 Intron	0.000444089	HLA-A	MYB 735.0 UTR	0.000241762	MYB	SPEN 1853.0 Flank	5.87071e-05	SPEN	134050431-134050431-chr9-Synonymous-SNP-T-T-G	0.000349129	BRD3
541	THRA Intron	0.000265013	THRA	DCC Non_Silent	0.000252003	DCC	102287379-102287380-chr8-Intron-DEL-AC-AC--	0.000443745	UBR5	CD28 UTR	0.000240836	CD28	34171545-34171545-chr19-5'Flank-SNP-G-G-T	5.83918e-05	LSM14A	MAP3K13 2203.0 Synonymous	0.000348547	MAP3K13
542	FANCA Intron	0.000264763	FANCA	CBL Non_Silent	0.000251679	CBL	152273921-152273921-chr7-Intron-SNP-C-C-T	0.000442868	KMT2C	DCC 10.0 UTR	0.000238821	DCC	CDK4 Flank	5.76277e-05	CDK4	BCORL1 Synonymous	0.000348052	BCORL1
543	NUP98 Non_Silent	0.000263918	NUP98	EPAS1 Non_Silent	0.000250997	EPAS1	1260401-1260402-chr5-Intron-DEL-CA-CA--	0.000442757	TERT	OLIG2 UTR	0.000238076	OLIG2	TCL1A Flank	5.72702e-05	TCL1A	29942845-29942845-chr6-Synonymous-SNP-C-C-T	0.000347896	HLA-A
544	100007026-100007028-chr2-Intron-DEL-GAA-GAA--	0.000263641	AFF3	31087861-31087863-chr8-In_Frame_Del-DEL-AAG-AAG--	0.000250207	WRN	15244613-15244616-chr19-Intron-DEL-AGAC-AGAC--	0.000441691	BRD4	TNC UTR	0.000235787	TNC	93320470-93320470-chr9-3'Flank-SNP-G-G-T	5.72421e-05	WNK2	DAXX Synonymous	0.000347479	DAXX
545	ROS1 Intron	0.000262377	ROS1	NDRG1 Non_Silent	0.000247963	NDRG1	ARHGAP26 Intron	0.000440995	ARHGAP26	31399640-31399640-chr22-5'UTR-SNP-T-T-G	0.000233891	DRG1	39846440-39846440-chr19-5'Flank-SNP-C-C-T	5.71088e-05	FBL	44253556-44253556-chr6-Synonymous-SNP-C-C-T	0.000347117	HSP90AB1
546	PIK3CB Non_Silent	0.000262099	PIK3CB	CDH11 Non_Silent	0.000246633	CDH11	TNC 408.0 Intron	0.000440127	TNC	5467955-5467955-chr9-3'UTR-SNP-G-G-A	0.000232787	CD274	10023844-10023844-chr3-5'Flank-SNP-G-G-A	5.70345e-05	FANCD2	TSHR Synonymous	0.000346694	TSHR
547	KDM5A Intron	0.000262049	KDM5A	ZFHX3 106.0 Non_Silent	0.000246601	ZFHX3	CDC73 402.0 Intron	0.000436852	CDC73	13989083-13989083-chr7-5'UTR-DEL-A-A--	0.000231504	ETV1	NUP98 0.0 Flank	5.68289e-05	NUP98	SOX2 Synonymous	0.000345174	SOX2
548	PRDM2 1475.0 Non_Silent	0.000262014	PRDM2	100709214-100709214-chr8-Missense_Mutation-SNP-G-G-A	0.000245832	PABPC1	BMP5 Intron	0.000436131	BMP5	SEPT5 UTR	0.000228172	SEPT5	SND1 Flank	5.45245e-05	SND1	BMP5 Synonymous	0.000345134	BMP5
549	RCE1 Intron	0.000261791	RCE1	MECOM Non_Silent	0.000244188	MECOM	BCL9L Intron	0.000436118	BCL9L	29942460-29942460-chr6-5'UTR-SNP-C-C-T	0.000226616	HLA-A	TAF1 Flank	5.41133e-05	TAF1	NAB2 Synonymous	0.000344824	NAB2
550	AKAP9 Intron	0.000261635	AKAP9	CSF1R 300.0 Non_Silent	0.0002437	CSF1R	CCNC Intron	0.0004357	CCNC	C7 1449.0 UTR	0.000224333	C7	60452697-60452697-chr2-3'Flank-DEL-A-A--	5.3797e-05	BCL11A	GLI1 213.0 Synonymous	0.000344563	GLI1
551	NBN Intron	0.000260972	NBN	152326137-152326137-chr4-Missense_Mutation-SNP-G-G-C	0.000243581	FBXW7	BRIP1 Intron	0.000434794	BRIP1	CREBBP UTR	0.000223236	CREBBP	AK1 0.0 Flank	5.19139e-05	AK1	SH2B3 Synonymous	0.000344505	SH2B3
552	CYLD Non_Silent	0.000259869	CYLD	CLTCL1 Non_Silent	0.000243348	CLTCL1	ARHGEF1 Intron	0.000434531	ARHGEF1	120069427-120069429-chr1-5'UTR-DEL-CCG-CCG--	0.000222942	NOTCH2	C5 Flank	5.02881e-05	C5	185437496-185437496-chr3-Synonymous-SNP-T-T-G	0.000343668	MAP3K13
553	TGFBR2 Intron	0.000259508	TGFBR2	KRAS 719.0 Non_Silent	0.000242664	KRAS	PRKACA Intron	0.000434109	PRKACA	RPL5 UTR	0.000222026	RPL5	F7 299.0 Flank	4.964e-05	F7	37171253-37171253-chr6-Synonymous-SNP-C-C-G	0.000341686	PIM1
554	PABPC1 127.0 Intron	0.000259176	PABPC1	C5 Non_Silent	0.000242347	C5	PIK3CB Intron	0.000432426	PIK3CB	TRIM33 97.0 UTR	0.000220956	TRIM33	VTI1A 7431.0 Flank	4.96018e-05	VTI1A	27095703-27095703-chr7-Synonymous-SNP-G-G-A	0.000340821	HOXA1
555	162776162-162776162-chr1-Missense_Mutation-SNP-C-C-A	0.000258238	DDR2	FGFR1 346.0 Non_Silent	0.000241555	FGFR1	NTRK1 Intron	0.000432361	NTRK1	NFATC2 UTR	0.000220267	NFATC2	FUS 0.0 Flank	4.92177e-05	FUS	MED1 Synonymous	0.000340137	MED1
556	XPC Non_Silent	0.000258103	XPC	NSD1 Non_Silent	0.000241537	NSD1	PAX7 Intron	0.000432004	PAX7	SMAD2 UTR	0.000219711	SMAD2	35913855-35913855-chr17-3'Flank-SNP-T-T-C	4.8629e-05	RDM1	29225546-29225546-chr2-Synonymous-SNP-T-T-G	0.0003399	ALK
557	ID1 Non_Silent	0.000256897	ID1	ATRX 2949.0 Non_Silent	0.000240427	ATRX	PRRX1 Intron	0.000430901	PRRX1	SDHC 1031.0 UTR	0.0002194	SDHC	EGFR Flank	4.848e-05	EGFR	LZTR1 Synonymous	0.000339174	LZTR1
558	MYCN Non_Silent	0.000256626	MYCN	195781054-195781054-chr3-Missense_Mutation-SNP-C-C-T	0.000240311	MUC4	BTK Intron	0.000430173	BTK	FOXA1 UTR	0.000219166	FOXA1	KMT2A Flank	4.82711e-05	KMT2A	TRAF7 Synonymous	0.000335582	TRAF7
559	ABL1 Non_Silent	0.000255796	ABL1	CTNNB1 Non_Silent	0.000239938	CTNNB1	SDHB Intron	0.000429685	SDHB	SF3B1 UTR	0.000217288	SF3B1	OLIG2 Flank	4.69074e-05	OLIG2	WAS Synonymous	0.000335183	WAS
560	BRD4 Intron	0.000255517	BRD4	PRDM2 1476.0 Non_Silent	0.000239574	PRDM2	ZMYM3 Intron	0.000428854	ZMYM3	CP UTR	0.000214968	CP	TP63 Flank	4.67867e-05	TP63	ASXL1 Synonymous	0.000334535	ASXL1
561	BRCA1 Non_Silent	0.000255073	BRCA1	ATM 424.0 Non_Silent	0.00023933	ATM	TCL1A 37.0 Intron	0.000427642	TCL1A	HSP90AB1 136.0 UTR	0.000214776	HSP90AB1	45348427-45348427-chr20-5'Flank-DEL-C-C--	4.63837e-05	SDC4	JAK1 Synonymous	0.000334333	JAK1
562	IRF4 Intron	0.000254443	IRF4	PTPRK Non_Silent	0.000238598	PTPRK	FGFR2 Intron	0.000427557	FGFR2	53422619-53422619-chrX-5'UTR-SNP-G-G-A	0.000214046	SMC1A	DCC 23916.0 Flank	4.63358e-05	DCC	ZNF331 Synonymous	0.000332847	ZNF331
563	POLQ 2293.0 Flank	0.000254222	POLQ	CASP8 Non_Silent	0.00023808	CASP8	47791155-47791158-chr2-Intron-DEL-TGTG-TGTG--	0.00042728	MSH6	ERCC5 623.0 UTR	0.000214004	ERCC5	HNRNPA2B1 Flank	4.61835e-05	HNRNPA2B1	PRDM2 Synonymous	0.000331503	PRDM2
564	DNMT3A 365.0 Non_Silent	0.000253934	DNMT3A	STIL 391.0 Non_Silent	0.000237462	STIL	105751385-105751386-chr3-Intron-DEL-AG-AG--	0.000425422	CBLB	PMS2 UTR	0.000213534	PMS2	PER1 Flank	4.50941e-05	PER1	CR1 1357.0 Synonymous	0.000331171	CR1
565	DNM2 Non_Silent	0.00025369	DNM2	29942850-29942850-chr6-Missense_Mutation-SNP-A-A-T	0.00023712	HLA-A	FOXP1 1733.0 Intron	0.000424298	FOXP1	CNTNAP2 UTR	0.000213005	CNTNAP2	106470803-106470803-chr2-5'Flank-SNP-C-C-T	4.50909e-05	RGPD3	41177264-41177264-chr22-Synonymous-SNP-T-T-C	0.000330324	EP300
566	HOXC13 Non_Silent	0.000253366	HOXC13	147620546-147620546-chr1-Missense_Mutation-SNP-G-G-T	0.000234503	BCL9	SLC34A2 206.0 Intron	0.000423435	SLC34A2	288113-288113-chr16-3'UTR-SNP-A-A-C	0.000212271	AXIN1	PRDM1 Flank	4.47863e-05	PRDM1	MSH2 Synonymous	0.000328772	MSH2
567	U2 Flank	0.000253012	U2	50186682-50186682-chr17-Missense_Mutation-SNP-T-T-G	0.000234488	COL1A1	FLNA 354.0 Intron	0.000423391	FLNA	DCT 850.0 UTR	0.000211276	DCT	29058663-29058663-chr22-3'Flank-SNP-G-G-A	4.43588e-05	ZNRF3	74048167-74048167-chr7-Synonymous-SNP-T-T-G	0.000328193	ELN
568	BRCA2 Non_Silent	0.000252047	BRCA2	T Non_Silent	0.000234462	T	EML4 Intron	0.000421042	EML4	AKAP9 UTR	0.000210485	AKAP9	64523983-64523984-chr14-3'Flank-DEL-TT-TT--	4.37022e-05	ZBTB1	KMT2C 2020.0 Synonymous	0.000326608	KMT2C
569	STAG2 Intron	0.000250168	STAG2	STRN Non_Silent	0.000234173	STRN	MLLT10 Intron	0.000420983	MLLT10	ID3 UTR	0.000210461	ID3	SDHC 1223.0 Flank	4.33144e-05	SDHC	SET Synonymous	0.00032527	SET
570	ZNRF3 Non_Silent	0.000249617	ZNRF3	LRIG3 Non_Silent	0.000233767	LRIG3	RAP1GDS1 Intron	0.000419368	RAP1GDS1	LIFR UTR	0.000210369	LIFR	POU5F1 Flank	4.28861e-05	POU5F1	23311802-23311802-chr22-Synonymous-SNP-G-G-A	0.000323232	BCR
571	FHIT Intron	0.000249526	FHIT	PDGFRA Non_Silent	0.000233047	PDGFRA	FANCD2 407.0 Intron	0.000419239	FANCD2	TPR UTR	0.000209614	TPR	36674774-36674774-chr6-5'Flank-SNP-A-A-G	4.22347e-05	CDKN1A	MAP2 Synonymous	0.000322604	MAP2
572	NUMA1 Intron	0.000249199	NUMA1	149542407-149542409-chr3-In_Frame_Del-DEL-CTG-CTG--	0.000233018	WWTR1	44236159-44236160-chr11-Intron-DEL-GT-GT--	0.000418891	EXT2	IRF4 318.0 UTR	0.000209281	IRF4	SFRP4 Flank	3.98634e-05	SFRP4	DCAF12L2 Synonymous	0.000319391	DCAF12L2
573	ZEB1 841.0 Intron	0.00024893	ZEB1	ITK Non_Silent	0.000232356	ITK	PARG 1337.0 Intron	0.000418102	PARG	TERT UTR	0.00020751	TERT	PAX8 0.0 Flank	3.94346e-05	PAX8	TAL1 Synonymous	0.000319071	TAL1
574	PABPC1 Synonymous	0.000248265	PABPC1	ID1 Non_Silent	0.000232001	ID1	MET Intron	0.0004179	MET	ERCC3 UTR	0.00020717	ERCC3	HOXA1 61.0 Flank	3.92487e-05	HOXA1	FOXO4 Synonymous	0.000318973	FOXO4
575	MECOM Synonymous	0.000248031	MECOM	1915344-1915344-chr20-Missense_Mutation-SNP-G-G-A	0.000231878	SIRPA	HLA-A 56.0 Intron	0.000415786	HLA-A	6465715-6465715-chr11-5'UTR-SNP-C-C-T	0.000207033	TRIM3	CNBD1 Flank	3.903e-05	CNBD1	PER1 Synonymous	0.000318867	PER1
576	152265083-152265083-chr7-Missense_Mutation-SNP-C-C-A	0.000247985	KMT2C	ACVR2A Non_Silent	0.000230843	ACVR2A	TRRAP 384.0 Intron	0.000415255	TRRAP	HOXA1 UTR	0.000206964	HOXA1	113275614-113275614-chr9-5'Flank-SNP-C-C-T	3.88914e-05	PRPF4	NONO 304.0 Synonymous	0.000317469	NONO
577	BCR 2652.0 Intron	0.00024794	BCR	20785322-20785324-chr7-In_Frame_Del-DEL-GCC-GCC--	0.000230567	SP8	ELK4 Intron	0.000414043	ELK4	PDGFRB UTR	0.000204655	PDGFRB	NSD1 Flank	3.851e-05	NSD1	CDK12 Synonymous	0.000314388	CDK12
578	MLLT10 Intron	0.000247878	MLLT10	ZNF384 Non_Silent	0.000229041	ZNF384	SGK1 Intron	0.000413975	SGK1	ZNF429 3.0 UTR	0.000204407	ZNF429	BCL11B 2040.0 Flank	3.84212e-05	BCL11B	NFKB2 Synonymous	0.000314205	NFKB2
579	1803847-1803849-chr4-Intron-DEL-CTG-CTG--	0.00024776	FGFR3	TAF1 Non_Silent	0.000228815	TAF1	CA2 Intron	0.000412438	CA2	BRCA2 UTR	0.00020429	BRCA2	FANCE 296.0 Flank	3.8114e-05	FANCE	PDGFB Synonymous	0.000312012	PDGFB
580	LCK Intron	0.000246854	LCK	MYC Non_Silent	0.000228602	MYC	FANCD2 459.0 Intron	0.000412434	FANCD2	RALGDS 634.0 UTR	0.000204066	RALGDS	43246656-43246656-chr17-5'Flank-SNP-T-T-G	3.76728e-05	U2	PRDM16 Synonymous	0.000310891	PRDM16
581	FUBP1 Intron	0.000245697	FUBP1	NFIB Non_Silent	0.000227704	NFIB	66850937-66850938-chr11-Intron-DEL-GA-GA--	0.000411625	PC	CIITA UTR	0.000203147	CIITA	ATP2B3 Flank	3.74848e-05	ATP2B3	BLM Synonymous	0.000309409	BLM
582	BARD1 Intron	0.000245689	BARD1	PBRM1 Non_Silent	0.00022764	PBRM1	29944067-29944067-chr6-Intron-SNP-T-T-A	0.000411161	HLA-A	CALR UTR	0.000200052	CALR	124495265-124495265-chr12-5'Flank-SNP-G-G-A	3.72752e-05	NCOR2	50406508-50406508-chr19-Synonymous-SNP-C-C-T	0.000308463	POLD1
583	NRAS Non_Silent	0.000245658	NRAS	EP300 1706.0 Non_Silent	0.000226997	EP300	150134048-150134048-chr5-Intron-SNP-A-A-C	0.000409275	PDGFRB	FAT1 UTR	0.000199611	FAT1	60452605-60452605-chr2-3'Flank-SNP-C-C-A	3.72449e-05	BCL11A	133754547-133754547-chr3-Synonymous-SNP-C-C-T	0.000307919	TF
584	RBM10 Synonymous	0.000245428	RBM10	8936200-8936200-chr19-Missense_Mutation-SNP-G-G-T	0.000226126	MUC16	TRIP11 Intron	0.000408089	TRIP11	82315253-82315253-chr17-3'UTR-SNP-T-T-G	0.000199478	CD7	ID1 Flank	3.68204e-05	ID1	MUC16 1232.0 Synonymous	0.000307678	MUC16
585	HLA-A 34.0 Non_Silent	0.000245282	HLA-A	100705009-100705009-chr8-Missense_Mutation-SNP-C-C-T	0.000224759	PABPC1	PDE4DIP 1804.0 Intron	0.000407756	PDE4DIP	CSF1R UTR	0.000199148	CSF1R	HRAS 0.0 Flank	3.56235e-05	HRAS	SYK Synonymous	0.000302515	SYK
586	TRIM24 Intron	0.000244771	TRIM24	CHD4 638.0 Non_Silent	0.000224087	CHD4	APC Intron	0.000407526	APC	ZBTB16 UTR	0.000197608	ZBTB16	29949917-29949918-chr6-3'Flank-INS-----GTAA	3.44527e-05	HLA-A	HIC2 567.0 Synonymous	0.000302427	HIC2
587	RAP1GDS1 Intron	0.00024424	RAP1GDS1	RECQL4 Non_Silent	0.000223766	RECQL4	44248808-44248809-chr6-Intron-DEL-TT-TT--	0.000407459	HSP90AB1	BCL3 223.0 UTR	0.000196479	BCL3	FOXR1 0.0 Flank	3.37204e-05	FOXR1	POLQ Synonymous	0.000302092	POLQ
588	MLLT6 147.0 Intron	0.00024346	MLLT6	MUC16 761.0 Non_Silent	0.00022332	MUC16	222918038-222918038-chr2-Splice_Region-SNP-C-C-T	0.000406356	ACSL3	COL2A1 UTR	0.000196062	COL2A1	25678872-25678872-chr4-3'Flank-SNP-G-G-T	3.31009e-05	SLC34A2	MYB Synonymous	0.000299634	MYB
589	NBEA Non_Silent	0.000243356	NBEA	195780322-195780322-chr3-Missense_Mutation-SNP-G-G-A	0.000221781	MUC4	2173879-2173881-chr16-Intron-DEL-GGG-GGG--	0.000404445	TRAF7	FANCC UTR	0.000196005	FANCC	34892925-34892925-chr21-5'Flank-SNP-C-C-A	3.3037e-05	RUNX1	ETV6 Synonymous	0.000298694	ETV6
590	GOLGA5 Intron	0.000243199	GOLGA5	APOB 32.0 Non_Silent	0.000221694	APOB	FANCD2 763.0 Intron	0.0004036	FANCD2	ERC1 UTR	0.00019487	ERC1	MPL 301.0 Flank	3.23872e-05	MPL	FANCD2 461.0 Synonymous	0.000297137	FANCD2
591	UBR5 688.0 Intron	0.000242799	UBR5	ZCCHC8 Non_Silent	0.000221692	ZCCHC8	ASXL2 Intron	0.000403582	ASXL2	HOXA11 UTR	0.000194793	HOXA11	159790307-159790307-chr6-5'Flank-SNP-C-C-A	3.22829e-05	TCP1	THRAP3 Synonymous	0.000296887	THRAP3
592	CA2 197.0 Intron	0.000242663	CA2	161672984-161672984-chr1-Missense_Mutation-SNP-T-T-G	0.00022162	FCGR2B	GRIN2A 39.0 Intron	0.000403281	GRIN2A	TGFBR2 UTR	0.000193433	TGFBR2	SSX1 Flank	3.20173e-05	SSX1	134050428-134050428-chr9-Synonymous-SNP-A-A-G	0.000296255	BRD3
593	C6 16.0 Intron	0.000242501	C6	TFE3 Non_Silent	0.000221063	TFE3	LARP4B Intron	0.000402725	LARP4B	BRIP1 38.0 UTR	0.000193355	BRIP1	STIL Flank	3.10702e-05	STIL	PAX5 Synonymous	0.000292451	PAX5
594	61780729-61780731-chr17-Intron-DEL-AAC-AAC--	0.000242261	BRIP1	PIK3CB 621.0 Non_Silent	0.000219696	PIK3CB	AK2 Intron	0.000401666	AK2	ARC UTR	0.000192739	ARC	21002830-21002830-chr22-3'Flank-SNP-G-G-A	3.09498e-05	LZTR1	DCAF12 41.0 Synonymous	0.000292176	DCAF12
595	SEPT9 Intron	0.000242144	SEPT9	152248119-152248119-chr7-Missense_Mutation-SNP-G-G-A	0.00021959	KMT2C	EBF1 Intron	0.000400797	EBF1	CD209 9.0 UTR	0.000191842	CD209	FLT4 0.0 Flank	3.09318e-05	FLT4	KLF6 Synonymous	0.000292153	KLF6
596	152247975-152247975-chr7-Missense_Mutation-SNP-G-G-A	0.000242084	KMT2C	SF3B1 Non_Silent	0.00021948	SF3B1	3679530-3679530-chr11-Intron-SNP-C-C-A	0.000400287	NUP98	STAT6 UTR	0.000191776	STAT6	GATA1 Flank	3.07996e-05	GATA1	SEPT9 Synonymous	0.00029194	SEPT9
597	MAML2 Non_Silent	0.000241908	MAML2	HLA-A 59.0 Non_Silent	0.000218228	HLA-A	STAG1 8007.0 Intron	0.000400078	STAG1	ALK UTR	0.000190924	ALK	TCL1A 86.0 Flank	2.93503e-05	TCL1A	PSD Synonymous	0.000290882	PSD
598	152248119-152248119-chr7-Missense_Mutation-SNP-G-G-A	0.000241859	KMT2C	PREX2 Non_Silent	0.00021791	PREX2	KMT2C 2017.0 Intron	0.000399167	KMT2C	CHD4 UTR	0.000190115	CHD4	25679057-25679057-chr4-3'Flank-SNP-T-T-A	2.91142e-05	SLC34A2	XPC Synonymous	0.000290656	XPC
599	NOTCH2 Non_Silent	0.000241349	NOTCH2	KMT2C 2778.0 Non_Silent	0.000217488	KMT2C	PALB2 Intron	0.00039746	PALB2	ZNF521 14.0 UTR	0.000190105	ZNF521	222298770-222298770-chr2-5'Flank-SNP-C-C-T	2.90891e-05	PAX3	RABEP1 Synonymous	0.000290536	RABEP1
600	TSC1 Intron	0.000240998	TSC1	ZFHX3 3539.0 Non_Silent	0.000217053	ZFHX3	SMC1A Intron	0.000397195	SMC1A	THRA UTR	0.00018973	THRA	155195226-155195226-chr1-5'Flank-SNP-T-T-C	2.8244e-05	MUC1	CLIP1 1767.0 Synonymous	0.000287052	CLIP1
601	27095700-27095700-chr7-Synonymous-SNP-G-G-A	0.000240633	HOXA1	RSF1 Non_Silent	0.000216852	RSF1	CTNND1 Intron	0.000396806	CTNND1	TRIM24 UTR	0.000189578	TRIM24	F12 Flank	2.79979e-05	F12	TP53 Synonymous	0.000285938	TP53
602	TEC Intron	0.000240284	TEC	F5 Non_Silent	0.000216367	F5	77522652-77522653-chr3-Intron-DEL-TG-TG--	0.000396113	ROBO2	FOXO4 UTR	0.000189446	FOXO4	92352146-92352146-chr11-5'Flank-SNP-C-C-T	2.75381e-05	FAT3	PTPRC Synonymous	0.000284477	PTPRC
603	TNC 1118.0 Non_Silent	0.000239857	TNC	WHSC1L1 Non_Silent	0.000215672	WHSC1L1	DDX10 Intron	0.000395773	DDX10	MLLT11 UTR	0.000189212	MLLT11	7736472-7736473-chr19-3'Flank-DEL-CC-CC--	2.69231e-05	CD209	FANCC Synonymous	0.000283757	FANCC
604	FKBP9 Intron	0.000239797	FKBP9	HLA-A 32.0 Non_Silent	0.000215148	HLA-A	5130313-5130313-chr17-Intron-SNP-T-T-G	0.000394953	USP6	EXT2 UTR	0.000188744	EXT2	DDR2 Flank	2.65797e-05	DDR2	ZNF479 Synonymous	0.000281045	ZNF479
605	ELL Intron	0.000239569	ELL	MGA 1016.0 Non_Silent	0.000215142	MGA	C2orf44 Intron	0.000394445	C2orf44	50400985-50400985-chr12-5'UTR-SNP-A-A-G	0.000187869	LARP4	NCOA4 Flank	2.65536e-05	NCOA4	CDH17 Synonymous	0.000277983	CDH17
606	AFF1 Intron	0.00023955	AFF1	PMS1 Non_Silent	0.000214637	PMS1	TNN 254.0 Intron	0.000394099	TNN	KDM5C UTR	0.000187549	KDM5C	240770553-240770553-chr1-3'Flank-SNP-C-C-T	2.61698e-05	RGS7	158767435-158767435-chr6-Synonymous-SNP-T-T-G	0.00027656	EZR
607	AKAP9 Synonymous	0.000239046	AKAP9	DCAF12L2 Non_Silent	0.000214427	DCAF12L2	IK Intron	0.000393314	IK	FLT4 UTR	0.00018699	FLT4	20002466-20002466-chr20-3'Flank-DEL-T-T--	2.56637e-05	RIN2	NUMA1 Synonymous	0.000274599	NUMA1
608	LPP 5990.0 Intron	0.000238825	LPP	TP53 109.0 Non_Silent	0.000214365	TP53	ATIC Intron	0.000392408	ATIC	CYSLTR2 UTR	0.000185825	CYSLTR2	6663186-6663186-chr12-3'Flank-SNP-C-C-T	2.54929e-05	ZNF384	5135264-5135264-chr17-Synonymous-SNP-C-C-A	0.000272069	USP6
609	98976756-98976756-chr7-Missense_Mutation-SNP-A-A-C	0.000238812	TRRAP	SETD2 Non_Silent	0.000214176	SETD2	224541-224541-chr5-Intron-SNP-C-C-T	0.000390263	SDHA	ROS1 UTR	0.000184602	ROS1	190179609-190179609-chr4-3'Flank-SNP-A-A-G	2.52441e-05	DUX4	JAK3 130.0 Synonymous	0.000270649	JAK3
610	NOTCH2 Synonymous	0.000238241	NOTCH2	MUC1 Non_Silent	0.000213591	MUC1	ZNF479 Intron	0.000387956	ZNF479	PIK3R1 219.0 UTR	0.00018456	PIK3R1	PAX7 0.0 Flank	2.50591e-05	PAX7	TG 400.0 Synonymous	0.000270009	TG
611	AMER1 Synonymous	0.00023743	AMER1	ARID2 Non_Silent	0.000213271	ARID2	CDKN1B Intron	0.000386532	CDKN1B	MDM2 UTR	0.000184395	MDM2	PHOX2B Flank	2.48936e-05	PHOX2B	42291667-42291667-chr19-Synonymous-SNP-A-A-G	0.000268818	CIC
612	LIFR Non_Silent	0.000237251	LIFR	SUZ12 Non_Silent	0.000213103	SUZ12	8904760-8904760-chr19-Intron-DEL-T-T--	0.000385652	MUC16	PTPRC UTR	0.000183109	PTPRC	IL6 Flank	2.47254e-05	IL6	ZBTB16 Synonymous	0.000268527	ZBTB16
613	WWP2 Non_Silent	0.000236927	WWP2	47171162-47171164-chrX-In_Frame_Del-DEL-GGA-GGA--	0.00021264	RBM10	AK1 135.0 Intron	0.000385161	AK1	TCF3 UTR	0.000181641	TCF3	FAH Flank	2.41164e-05	FAH	FLCN Synonymous	0.000267661	FLCN
614	25799435-25799437-chr2-In_Frame_Del-DEL-CTG-CTG--	0.000235652	ASXL2	ARHGEF1 419.0 Non_Silent	0.000211633	ARHGEF1	RAF1 511.0 Intron	0.000385154	RAF1	FANCE UTR	0.000180376	FANCE	169149786-169149786-chr3-5'Flank-SNP-A-A-G	2.37645e-05	MECOM	EZR 35.0 Synonymous	0.000266773	EZR
615	49885105-49885106-chr10-Intron-DEL-TC-TC--	0.000235607	PARG	NFKB2 Non_Silent	0.00021143	NFKB2	TP63 Intron	0.000382889	TP63	EWSR1 UTR	0.000180187	EWSR1	50418015-50418015-chr19-3'Flank-SNP-T-T-C	2.35621e-05	POLD1	5135282-5135282-chr17-Splice_Region-SNP-G-G-A	0.000266017	USP6
616	MSN Intron	0.000235529	MSN	JAK2 Non_Silent	0.000211344	JAK2	FLT3 Intron	0.00038141	FLT3	T 9.0 UTR	0.000179971	T	121050399-121050399-chr9-5'Flank-SNP-C-C-A	2.3423e-05	C5	NAB2 56.0 Synonymous	0.000265914	NAB2
617	ABL1 981.0 Non_Silent	0.000234881	ABL1	NCOR2 Non_Silent	0.000211267	NCOR2	AKT2 Intron	0.000381386	AKT2	CCND1 206.0 UTR	0.000178548	CCND1	190179617-190179617-chr4-3'Flank-SNP-T-T-A	2.31247e-05	DUX4	SETBP1 5440.0 Synonymous	0.000265859	SETBP1
618	7673781-7673781-chr17-Missense_Mutation-SNP-C-C-G	0.000234865	TP53	SFRP4 33.0 Non_Silent	0.000210246	SFRP4	RECQL4 Intron	0.000381278	RECQL4	33026738-33026739-chr21-5'UTR-DEL-CT-CT--	0.000178443	OLIG2	PTPRB 2433.0 Flank	2.31022e-05	PTPRB	DNAJB1 Synonymous	0.000265206	DNAJB1
619	C3 Non_Silent	0.000234779	C3	29823727-29823727-chr19-Missense_Mutation-SNP-A-A-C	0.000208062	CCNE1	ACSL3 1143.0 Intron	0.000380009	ACSL3	DCD UTR	0.000177857	DCD	64764475-64764475-chr11-3'Flank-DEL-C-C--	2.23484e-05	SF1	BCL2L12 Synonymous	0.000265089	BCL2L12
620	KMT2C 2265.0 Non_Silent	0.000234659	KMT2C	47803500-47803501-chr2-Frame_Shift_Ins-INS-----C	0.000207957	MSH6	ARNT Intron	0.000378769	ARNT	MYOD1 UTR	0.000177379	MYOD1	CLTC Flank	2.22005e-05	CLTC	186620946-186620946-chr4-Synonymous-SNP-G-G-T	0.000265052	FAT1
621	152248140-152248140-chr7-Missense_Mutation-SNP-T-T-C	0.000234506	KMT2C	FOXO3 Non_Silent	0.000207508	FOXO3	ETV6 Intron	0.000378497	ETV6	KLF6 UTR	0.000176608	KLF6	127866099-127866100-chr9-3'Flank-INS-----TG	2.21935e-05	AK1	PTK6 184.0 Synonymous	0.000264831	PTK6
622	SPEN Non_Silent	0.000234452	SPEN	KIT Non_Silent	0.00020733	KIT	WRN 2331.0 Intron	0.000378197	WRN	PAX7 UTR	0.000176505	PAX7	SP8 54.0 Flank	2.18496e-05	SP8	TCF7L2 Synonymous	0.000263316	TCF7L2
623	2945756-2945757-chr7-Intron-DEL-AC-AC--	0.000233516	CARD11	EML4 Non_Silent	0.000206263	EML4	MEN1 Intron	0.000377765	MEN1	79599909-79599914-chr16-5'UTR-DEL-GCCGCC-GCCGCC--	0.000175613	MAF	SDC4 464.0 Flank	2.17813e-05	SDC4	122361148-122361148-chr12-Synonymous-SNP-G-G-A	0.000261142	CLIP1
624	CTNND1 Intron	0.000233282	CTNND1	CDH17 Non_Silent	0.000205528	CDH17	ELN 599.0 Intron	0.000377649	ELN	SDHD UTR	0.000173634	SDHD	HOXA11 76.0 Flank	2.12116e-05	HOXA11	KIT Synonymous	0.000259863	KIT
625	FANCG 91.0 Intron	0.000232866	FANCG	SMAD4 Non_Silent	0.000205033	SMAD4	66850937-66850940-chr11-Intron-DEL-GAGA-GAGA--	0.000377219	PC	AR 10.0 UTR	0.000172795	AR	69757363-69757363-chr16-5'Flank-SNP-T-T-G	2.08188e-05	WWP2	6581725-6581725-chr12-Synonymous-SNP-T-T-G	0.000259041	CHD4
626	WRN Synonymous	0.000231571	WRN	RLF Non_Silent	0.000205027	RLF	10048150-10048150-chr3-Intron-SNP-A-A-T	0.000376402	FANCD2	ARID1A 1695.0 UTR	0.000172533	ARID1A	149515875-149515877-chr3-3'Flank-DEL-TTT-TTT--	2.07508e-05	WWTR1	DDX3X Synonymous	0.000256652	DDX3X
627	8985600-8985602-chr3-In_Frame_Del-DEL-GCT-GCT--	0.00023156	SRGAP3	AFF3 Non_Silent	0.000204916	AFF3	MAP2 2342.0 Intron	0.00037464	MAP2	DCAF12 38.0 UTR	0.000171938	DCAF12	190179591-190179591-chr4-3'Flank-SNP-A-A-G	2.07204e-05	DUX4	LCK Synonymous	0.000255915	LCK
628	EBF1 Intron	0.000231074	EBF1	RB1 3119.0 Non_Silent	0.000204559	RB1	20136232-20136233-chrX-Intron-DEL-CA-CA--	0.000374532	EIF1AX	MAPK1 UTR	0.000170977	MAPK1	KIT Flank	2.04097e-05	KIT	AR Synonymous	0.000255609	AR
629	50188800-50188801-chr17-Splice_Region-DEL-AG-AG--	0.000230507	COL1A1	SMC1A Non_Silent	0.000204233	SMC1A	RAC1 Intron	0.00037363	RAC1	CD7 UTR	0.000170538	CD7	65506098-65506100-chr11-5'Flank-DEL-AAA-AAA--	2.03817e-05	MALAT1	EPAS1 Synonymous	0.000254516	EPAS1
630	MAP2 Intron	0.000229394	MAP2	NCOA4 Non_Silent	0.000204045	NCOA4	FANCD2 761.0 Intron	0.000371383	FANCD2	BCL2L12 4.0 UTR	0.000169681	BCL2L12	6946697-6946697-chr12-5'Flank-SNP-T-T-C	2.00871e-05	PTPN6	BAP1 Synonymous	0.000254005	BAP1
631	CHD4 Intron	0.000229308	CHD4	TNFRSF14 Non_Silent	0.000203164	TNFRSF14	MED1 Intron	0.000369299	MED1	ZNF429 2.0 UTR	0.000168392	ZNF429	SP1 0.0 Flank	1.96757e-05	SP1	100712676-100712676-chr8-Synonymous-SNP-T-T-C	0.000253064	PABPC1
632	SLC34A2 Intron	0.000229296	SLC34A2	APOB 96.0 Non_Silent	0.000202871	APOB	OTC Intron	0.00036896	OTC	ALDH2 UTR	0.000167929	ALDH2	POLD1 Flank	1.96243e-05	POLD1	MYCN Synonymous	0.000252661	MYCN
633	SRGAP3 Non_Silent	0.000229191	SRGAP3	BRIP1 Non_Silent	0.000201934	BRIP1	RSF1 500.0 Intron	0.000367712	RSF1	ASPSCR1 797.0 UTR	0.000167373	ASPSCR1	UBP1 Flank	1.93301e-05	UBP1	29942881-29942881-chr6-Synonymous-SNP-C-C-T	0.000251297	HLA-A
634	EZR Intron	0.000228237	EZR	CASC5 565.0 Non_Silent	0.000201575	CASC5	10047693-10047693-chr3-Intron-SNP-G-G-A	0.00036769	FANCD2	CD209 17.0 UTR	0.000166468	CD209	ZNF3 0.0 Flank	1.91602e-05	ZNF3	SIRPA Synonymous	0.000248557	SIRPA
635	EIF3E Intron	0.000226593	EIF3E	NBN Non_Silent	0.00020105	NBN	193142099-193142100-chr1-Intron-DEL-GA-GA--	0.000366614	CDC73	RSF1 UTR	0.00016473	RSF1	6857154-6857154-chr19-3'Flank-SNP-C-C-A	1.88897e-05	VAV1	NCKIPSD Synonymous	0.000247312	NCKIPSD
636	10825121-10825121-chr19-Missense_Mutation-SNP-T-T-G	0.00022632	DNM2	26751695-26751697-chr10-In_Frame_Del-DEL-TGG-TGG--	0.0001996	ABI1	KMT2C 2606.0 Intron	0.000365946	KMT2C	FOXL2 27.0 UTR	0.000163825	FOXL2	CUX1 0.0 Flank	1.81782e-05	CUX1	BUB1B Synonymous	0.000247182	BUB1B
637	NUP214 773.0 Intron	0.00022589	NUP214	WRN 1082.0 Non_Silent	0.000199072	WRN	TSHR 2834.0 Intron	0.000365735	TSHR	DDX10 3.0 UTR	0.000163091	DDX10	134177771-134177771-chr6-5'Flank-SNP-A-A-G	1.8136e-05	SGK1	PRF1 Synonymous	0.000246991	PRF1
638	ERCC3 642.0 Non_Silent	0.000225761	ERCC3	50492793-50492793-chr15-Missense_Mutation-SNP-T-T-C	0.000197854	USP8	PDGFB 200.0 Intron	0.000364496	PDGFB	PPFIBP1 UTR	0.000161971	PPFIBP1	33010830-33010831-chr1-3'Flank-INS-----AGGATGTGGCTTTGGAGA	1.712e-05	AK2	HLA-A 31.0 Synonymous	0.000246735	HLA-A
639	FGFR2 Intron	0.00022572	FGFR2	AR Non_Silent	0.000197737	AR	117328787-117328787-chr6-Intron-SNP-T-T-G	0.000363765	ROS1	134427491-134427491-chrX-3'UTR-DEL-T-T--	0.000161166	PHF6	190179642-190179642-chr4-3'Flank-SNP-A-A-C	1.68885e-05	DUX4	STK11 Synonymous	0.000246278	STK11
640	MYO5A Intron	0.00022568	MYO5A	RARA Non_Silent	0.000196067	RARA	EIF4A2 Intron	0.000363521	EIF4A2	102249048-102249048-chr7-3'UTR-SNP-C-C-T	0.000161136	CUX1	57132515-57132515-chr7-5'Flank-SNP-T-T-C	1.68799e-05	ZNF479	NIN Synonymous	0.000245459	NIN
641	FIP1L1 Intron	0.000225173	FIP1L1	POLD1 Non_Silent	0.000196044	POLD1	CLTC Intron	0.000363517	CLTC	NR4A3 UTR	0.000159938	NR4A3	SP1 630.0 Flank	1.68699e-05	SP1	TP63 Synonymous	0.000245113	TP63
642	HOXA1 55.0 Non_Silent	0.00022511	HOXA1	RSPO2 Non_Silent	0.000195905	RSPO2	LYL1 Intron	0.000362893	LYL1	25209618-25209618-chr12-3'UTR-SNP-A-A-C	0.000159222	KRAS	69758072-69758072-chr16-5'Flank-DEL-T-T--	1.64645e-05	WWP2	HNRNPA2B1 Synonymous	0.000243541	HNRNPA2B1
643	FAT4 Non_Silent	0.000224734	FAT4	CER1 Non_Silent	0.000195287	CER1	LMNA Intron	0.000362543	LMNA	LRP1B 37988.0 UTR	0.000158627	LRP1B	13920136-13920136-chr16-5'Flank-SNP-T-T-A	1.64539e-05	ERCC4	EGF Synonymous	0.000242773	EGF
644	RBM10 Non_Silent	0.00022472	RBM10	TP53 136.0 Non_Silent	0.000194812	TP53	F2 Intron	0.000362141	F2	82017350-82017350-chr17-3'UTR-SNP-G-G-C	0.000158217	ASPSCR1	38705448-38705450-chr17-5'Flank-DEL-GAG-GAG--	1.62595e-05	MLLT6	MUC4 762.0 Synonymous	0.000242642	MUC4
645	152235812-152235812-chr7-Splice_Region-SNP-C-C-A	0.000224643	KMT2C	48459699-48459699-chr13-Missense_Mutation-SNP-G-G-A	0.000194661	RB1	HLA-A 38.0 Intron	0.000361848	HLA-A	TNN UTR	0.000157834	TNN	186783496-186783496-chr3-5'Flank-SNP-G-G-A	1.60777e-05	EIF4A2	BCL11B Synonymous	0.0002413	BCL11B
646	APOBEC3B Intron	0.000223951	APOBEC3B	FBXW7 1804.0 Non_Silent	0.00019461	FBXW7	KCNJ5 Intron	0.000361484	KCNJ5	186709835-186709835-chr4-5'UTR-SNP-C-C-A	0.00015631	FAT1	33010835-33010836-chr1-3'Flank-INS-----TTGGAGAAGGCTGCTAGG	1.58391e-05	AK2	BCLAF1 Synonymous	0.000238668	BCLAF1
647	CARD11 364.0 Non_Silent	0.000223235	CARD11	CCDC6 Non_Silent	0.000194052	CCDC6	MUC4 1298.0 Intron	0.000361419	MUC4	BCL11A 62.0 UTR	0.000156225	BCL11A	GNA11 Flank	1.56439e-05	GNA11	TSC2 656.0 Synonymous	0.000238403	TSC2
648	MUC4 781.0 Non_Silent	0.000222925	MUC4	TMEM127 111.0 Non_Silent	0.000193204	TMEM127	PPFIBP1 2520.0 Intron	0.00036112	PPFIBP1	29942512-29942512-chr6-5'UTR-SNP-G-G-C	0.000155333	HLA-A	32439785-32439785-chr11-5'Flank-SNP-G-G-A	1.55954e-05	WT1	KCNJ5 Synonymous	0.000237403	KCNJ5
649	100709481-100709481-chr8-Missense_Mutation-SNP-T-T-A	0.000222907	PABPC1	MLLT4 Non_Silent	0.000192833	MLLT4	SPECC1 Intron	0.000360545	SPECC1	CD2 289.0 UTR	0.00015439	CD2	EPAS1 Flank	1.53811e-05	EPAS1	CTNND2 Synonymous	0.000237215	CTNND2
650	LAT 30.0 Non_Silent	0.000222529	LAT	CREBBP 74.0 Non_Silent	0.000192775	CREBBP	29943718-29943718-chr6-Intron-SNP-G-G-A	0.000360422	HLA-A	TF 9.0 UTR	0.000154278	TF	PAX8 1260.0 Flank	1.50757e-05	PAX8	NUP214 497.0 Synonymous	0.000236978	NUP214
651	KTN1 Synonymous	0.000222442	KTN1	50186693-50186693-chr17-Missense_Mutation-SNP-T-T-G	0.000192508	COL1A1	AKT3 Intron	0.000360119	AKT3	LMO1 UTR	0.000153942	LMO1	102139839-102139839-chr14-5'Flank-SNP-T-T-G	1.50193e-05	HSP90AA1	HR Synonymous	0.000236492	HR
652	CIITA Intron	0.000221617	CIITA	147918568-147918568-chr2-Missense_Mutation-SNP-G-G-C	0.00019242	ACVR2A	68056194-68056194-chr8-Intron-SNP-T-T-C	0.000359998	PREX2	PBX1 UTR	0.000153205	PBX1	RUNX1 2019.0 Flank	1.49088e-05	RUNX1	PABPC1 196.0 Synonymous	0.000235888	PABPC1
653	SIRPA 412.0 Non_Silent	0.000220698	SIRPA	PABPC1 41.0 Non_Silent	0.000191951	PABPC1	NBN Intron	0.000359008	NBN	FOXL2 26.0 UTR	0.000152698	FOXL2	5123803-5123804-chr17-5'Flank-DEL-AC-AC--	1.47667e-05	USP6	175085412-175085412-chr1-Synonymous-SNP-C-C-T	0.000235596	TNN
654	PRKAR1A Intron	0.000220561	PRKAR1A	MUC16 1202.0 Non_Silent	0.000191736	MUC16	CDH10 Intron	0.000358192	CDH10	CD2 1.0 UTR	0.00015086	CD2	69757842-69757842-chr16-5'Flank-SNP-T-T-G	1.46089e-05	WWP2	ECT2L Synonymous	0.000233762	ECT2L
655	FLT4 385.0 Intron	0.000220436	FLT4	100715522-100715522-chr8-Missense_Mutation-SNP-T-T-C	0.000191458	PABPC1	FANCD2 426.0 Intron	0.00035808	FANCD2	BTK UTR	0.000150772	BTK	7750937-7750937-chr19-5'Flank-SNP-G-G-A	1.4328e-05	CD209	SMO Synonymous	0.000233482	SMO
656	ZFHX3 Synonymous	0.000220383	ZFHX3	WWP2 Non_Silent	0.000191003	WWP2	AK2 8.0 Intron	0.000358018	AK2	132880996-132880996-chr5-3'UTR-SNP-T-T-G	0.000150581	AFF4	TRIM2 Flank	1.43187e-05	TRIM2	185473266-185473266-chr3-Synonymous-SNP-T-T-C	0.000233411	MAP3K13
657	CNTNAP2 Non_Silent	0.000220075	CNTNAP2	92939657-92939659-chr15-In_Frame_Del-DEL-GAT-GAT--	0.000189577	CHD2	FNBP1 Intron	0.000357336	FNBP1	CHCHD7 UTR	0.000150282	CHCHD7	10023889-10023890-chr3-5'Flank-INS-----A	1.40503e-05	FANCD2	DNM2 2222.0 Synonymous	0.000233176	DNM2
658	PAX8 Non_Silent	0.000219576	PAX8	THRAP3 Non_Silent	0.000188904	THRAP3	39240895-39240898-chr22-Intron-DEL-TCTC-TCTC--	0.000356258	PDGFB	52340663-52340665-chr18-5'UTR-DEL-GAG-GAG--	0.000149734	DCC	101816045-101816045-chr7-5'Flank-SNP-G-G-T	1.40194e-05	CUX1	ARHGAP5 314.0 Synonymous	0.000231986	ARHGAP5
659	TNN Non_Silent	0.000219096	TNN	130055979-130055979-chrX-Missense_Mutation-SNP-T-T-G	0.000188791	BCORL1	FIP1L1 Intron	0.000356184	FIP1L1	CSMD3 36.0 UTR	0.000149695	CSMD3	6009173-6009173-chr7-5'Flank-SNP-G-G-C	1.39721e-05	PMS2	CNTRL Synonymous	0.000231326	CNTRL
660	PAX3 UTR	0.000218821	PAX3	PABPC1 131.0 Non_Silent	0.000187927	PABPC1	59814600-59814603-chr10-Intron-DEL-ACAC-ACAC--	0.000355994	CCDC6	LHFP UTR	0.00014957	LHFP	60553541-60553542-chr2-5'Flank-DEL-GA-GA--	1.39091e-05	BCL11A	38985994-38985994-chr22-Synonymous-SNP-T-T-C	0.000230243	APOBEC3B
661	236561-236561-chr5-Missense_Mutation-SNP-G-G-A	0.000218041	SDHA	DDB2 Non_Silent	0.000187645	DDB2	MDM4 Intron	0.000352304	MDM4	KRAS UTR	0.000148485	KRAS	CNBD1 0.0 Flank	1.37941e-05	CNBD1	GATA2 Synonymous	0.000230108	GATA2
662	NCOR1 Intron	0.000217794	NCOR1	32974751-32974751-chr7-Missense_Mutation-SNP-A-A-G	0.000187493	FKBP9	CDH1 Intron	0.000351782	CDH1	PRDM16 7293.0 UTR	0.000147819	PRDM16	LARP4B 1526.0 Flank	1.35965e-05	LARP4B	T Synonymous	0.000228226	T
663	42207488-42207493-chr17-Intron-DEL-CACACA-CACACA--	0.00021773	STAT5B	71140798-71140800-chrX-In_Frame_Del-DEL-CAG-CAG--	0.000187205	MED12	31361144-31361144-chr10-Intron-SNP-T-T-A	0.000351772	ZEB1	BTK 7.0 UTR	0.00014767	BTK	134177629-134177629-chr6-5'Flank-SNP-G-G-T	1.35145e-05	SGK1	195784797-195784797-chr3-Synonymous-SNP-G-G-A	0.000225773	MUC4
664	KDR Intron	0.000217474	KDR	132896601-132896603-chr9-In_Frame_Del-DEL-GCT-GCT--	0.000186278	TSC1	SMO Intron	0.000350846	SMO	RECQL4 UTR	0.000145441	RECQL4	KMT2D 729.0 Flank	1.33108e-05	KMT2D	PDCD1 Synonymous	0.000225669	PDCD1
665	FLT4 Intron	0.000217441	FLT4	100709201-100709201-chr8-Missense_Mutation-SNP-T-T-G	0.000185428	PABPC1	SDHC Intron	0.000349822	SDHC	RECQL4 2.0 UTR	0.000145425	RECQL4	11262571-11262571-chr1-5'Flank-SNP-G-G-T	1.32034e-05	MTOR	FLI1 Synonymous	0.000225429	FLI1
666	RET Intron	0.000217117	RET	CRTC3 Non_Silent	0.000185049	CRTC3	TP53 Intron	0.000349053	TP53	RPL10 2.0 UTR	0.00014507	RPL10	106470959-106470959-chr2-5'Flank-DEL-A-A--	1.2783e-05	RGPD3	34088398-34088398-chr9-Synonymous-SNP-A-A-C	0.000224412	DCAF12
667	KIAA1549 Non_Silent	0.000216538	KIAA1549	14178466-14178468-chr3-In_Frame_Del-DEL-CCT-CCT--	0.00018458	XPC	10063981-10063981-chr3-Intron-SNP-C-C-G	0.000347422	FANCD2	MITF UTR	0.000144772	MITF	7751208-7751208-chr19-5'Flank-SNP-A-A-G	1.27693e-05	CD209	TPR Synonymous	0.000224154	TPR
668	31087861-31087863-chr8-In_Frame_Del-DEL-AAG-AAG--	0.00021652	WRN	JAK3 Non_Silent	0.000184306	JAK3	NACA 121.0 Intron	0.000347319	NACA	26475240-26475240-chr1-3'UTR-SNP-G-G-T	0.000143937	HMGN2	190179946-190179946-chr4-3'Flank-SNP-G-G-C	1.27043e-05	DUX4	195788589-195788589-chr3-Synonymous-SNP-A-A-G	0.000223633	MUC4
669	EPS15 Synonymous	0.000215266	EPS15	CCND1 203.0 Non_Silent	0.000184213	CCND1	31150310-31150312-chr8-Intron-DEL-TTG-TTG--	0.000347308	WRN	IRF4 UTR	0.000143861	IRF4	32439479-32439480-chr11-5'Flank-INS-----G	1.25503e-05	WT1	ESR1 Synonymous	0.000223198	ESR1
670	CDH10 Intron	0.000215248	CDH10	TCF7L2 Non_Silent	0.000184012	TCF7L2	IL7 Intron	0.000347172	IL7	FAM131B UTR	0.000143743	FAM131B	110633983-110633984-chr2-3'Flank-DEL-AA-AA--	1.24111e-05	BUB1	PML Synonymous	0.000223024	PML
671	CHD4 Synonymous	0.000214478	CHD4	RANBP2 593.0 Non_Silent	0.00018376	RANBP2	ROS1 441.0 Intron	0.000346433	ROS1	PIM1 80.0 UTR	0.000143403	PIM1	106404303-106404303-chr2-3'Flank-SNP-C-C-A	1.2246e-05	RGPD3	CNTNAP2 14470.0 Synonymous	0.000222959	CNTNAP2
672	KIT Intron	0.000214466	KIT	IRF4 Non_Silent	0.000183341	IRF4	MSI2 37.0 Intron	0.000346339	MSI2	HERPUD1 UTR	0.000143005	HERPUD1	207052134-207052134-chr1-5'Flank-SNP-G-G-T	1.20271e-05	YOD1	20784995-20784995-chr7-Synonymous-SNP-C-C-T	0.000222168	SP8
673	29049831-29049833-chr22-In_Frame_Del-DEL-CAG-CAG--	0.000214309	ZNRF3	7669662-7669662-chr17-Missense_Mutation-SNP-T-T-G	0.000182549	TP53	SMARCD1 28.0 Intron	0.000346139	SMARCD1	C2 UTR	0.000142772	C2	31605268-31605268-chr20-5'Flank-SNP-A-A-C	1.19009e-05	ID1	CHST11 6012.0 Synonymous	0.00022104	CHST11
674	USP6 39.0 Intron	0.000214281	USP6	102404597-102404597-chr10-Missense_Mutation-SNP-T-T-G	0.000182373	PSD	XPC Intron	0.000344861	XPC	CD79A UTR	0.00014232	CD79A	106401285-106401285-chr2-3'Flank-SNP-T-T-G	1.18876e-05	RGPD3	ROBO2 8752.0 Synonymous	0.000221032	ROBO2
675	207564326-207564327-chr1-Intron-DEL-AC-AC--	0.000214185	CR1	PABPC1 298.0 Non_Silent	0.000181514	PABPC1	167918609-167918610-chr6-Intron-DEL-TG-TG--	0.000344359	MLLT4	ID2 UTR	0.000139608	ID2	MLLT10 Flank	1.18451e-05	MLLT10	EML4 Synonymous	0.000220815	EML4
676	AK2 6.0 Non_Silent	0.000213998	AK2	STIL Non_Silent	0.000181025	STIL	STAG1 Intron	0.000343867	STAG1	KLK2 UTR	0.0001396	KLK2	62143722-62143722-chr20-5'Flank-SNP-T-T-G	1.17954e-05	SS18L1	SETD2 Synonymous	0.000220063	SETD2
677	94439863-94439863-chr13-3'UTR-SNP-G-G-T	0.000213904	DCT	ETV4 Non_Silent	0.000179352	ETV4	TAF1 1157.0 Intron	0.000343384	TAF1	29942412-29942412-chr6-5'UTR-SNP-A-A-T	0.000139227	HLA-A	ZNF3 Flank	1.17475e-05	ZNF3	108663889-108663889-chr6-Synonymous-SNP-C-C-G	0.000218808	FOXO3
678	KMT2D Intron	0.000213768	KMT2D	TNN 193.0 Non_Silent	0.000179217	TNN	PWWP2A Intron	0.000343295	PWWP2A	TEC 33.0 UTR	0.000138847	TEC	1203717-1203722-chr19-5'Flank-DEL-GTGAAG-GTGAAG--	1.15823e-05	STK11	29944144-29944144-chr6-Synonymous-SNP-C-C-T	0.00021823	HLA-A
679	ERC1 Intron	0.000213509	ERC1	138683737-138683737-chr3-Missense_Mutation-SNP-A-A-C	0.000178976	PIK3CB	FCRL4 454.0 Intron	0.000342074	FCRL4	ERCC2 25.0 UTR	0.000137926	ERCC2	101816106-101816106-chr7-5'Flank-SNP-C-C-A	1.15794e-05	CUX1	MDM4 Synonymous	0.000215765	MDM4
680	AK2 5.0 Non_Silent	0.000213231	AK2	FCGR2B Non_Silent	0.000177899	FCGR2B	CRTC1 1270.0 Intron	0.000340669	CRTC1	C2orf44 UTR	0.00013788	C2orf44	GNAS Flank	1.15379e-05	GNAS	AFF1 Synonymous	0.000212878	AFF1
681	DDB2 Synonymous	0.000212982	DDB2	HLA-A 35.0 Non_Silent	0.000177631	HLA-A	CSMD3 9196.0 Intron	0.000340606	CSMD3	MLF1 2.0 UTR	0.000137422	MLF1	SFRP4 221.0 Flank	1.15184e-05	SFRP4	MUC16 2045.0 Synonymous	0.000211599	MUC16
682	CHD4 Non_Silent	0.000212709	CHD4	PRDM16 Non_Silent	0.000177374	PRDM16	PPP2R1A Intron	0.000339015	PPP2R1A	EBF1 63.0 UTR	0.000137355	EBF1	CD79B Flank	1.14395e-05	CD79B	PDE4D Synonymous	0.000211414	PDE4D
683	33010691-33010691-chr1-3'Flank-SNP-A-A-G	0.000211681	AK2	ZBTB1 Non_Silent	0.000176916	ZBTB1	EWSR1 Intron	0.000338696	EWSR1	KDR UTR	0.00013629	KDR	23318562-23318562-chr22-3'Flank-SNP-C-C-G	1.14129e-05	BCR	100715538-100715538-chr8-Synonymous-SNP-T-T-C	0.000208607	PABPC1
684	ALK 100.0 Intron	0.000211464	ALK	TNC 1328.0 Non_Silent	0.000176102	TNC	USP6 39.0 Intron	0.000337405	USP6	RDM1 UTR	0.000136243	RDM1	65500901-65500901-chr11-3'Flank-SNP-G-G-T	1.13953e-05	MALAT1	EP300 1710.0 Synonymous	0.000208418	EP300
685	MITF Synonymous	0.000211424	MITF	CHEK2 163.0 Non_Silent	0.000175799	CHEK2	KMT2C 4646.0 Intron	0.000336545	KMT2C	MAP2K1 UTR	0.000135699	MAP2K1	32440106-32440108-chr11-5'Flank-DEL-GTC-GTC--	1.13923e-05	WT1	POLG Synonymous	0.000207015	POLG
686	49033483-49033485-chr12-In_Frame_Del-DEL-TGC-TGC--	0.000211325	KMT2D	BARD1 Non_Silent	0.000174375	BARD1	TAL1 Intron	0.000336093	TAL1	HOOK3 UTR	0.000134647	HOOK3	32439111-32439111-chr11-5'Flank-SNP-G-G-A	1.12e-05	WT1	CTNNB1 Synonymous	0.000206974	CTNNB1
687	DDX1 287.0 Intron	0.00021113	DDX1	1915414-1915414-chr20-Missense_Mutation-SNP-T-T-C	0.000174337	SIRPA	39240940-39240945-chr22-Intron-DEL-CACTCT-CACTCT--	0.000335192	PDGFB	TRIM2 3661.0 UTR	0.000131914	TRIM2	36464495-36464495-chr1-3'Flank-SNP-C-C-A	1.11293e-05	CSF3R	RBM15 46.0 Synonymous	0.00020564	RBM15
688	AFF3 1123.0 Non_Silent	0.000210999	AFF3	CUX1 Non_Silent	0.000172316	CUX1	ZNF429 610.0 Intron	0.000334867	ZNF429	CREB3 UTR	0.000130234	CREB3	87235086-87235086-chr10-3'Flank-SNP-G-G-A	1.09025e-05	NUTM2A	EIF3E Synonymous	0.000205198	EIF3E
689	FCRL4 Intron	0.000210598	FCRL4	53666432-53666432-chr3-Missense_Mutation-SNP-T-T-G	0.000172284	CACNA1D	TOP1 Intron	0.000334856	TOP1	HIC2 UTR	0.000130209	HIC2	159790453-159790453-chr6-5'Flank-SNP-T-T-C	1.08549e-05	TCP1	186708937-186708937-chr4-Synonymous-SNP-A-A-C	0.000205148	FAT1
690	29942911-29942911-chr6-Missense_Mutation-SNP-A-A-G	0.000210345	HLA-A	533874-533874-chr11-Missense_Mutation-SNP-T-T-C	0.00017224	HRAS	NCOA1 Intron	0.000333132	NCOA1	GC UTR	0.000130169	GC	ERCC2 Flank	1.08293e-05	ERCC2	GRM3 Synonymous	0.000204956	GRM3
691	KMT2C 2266.0 Non_Silent	0.000210152	KMT2C	NBEA Non_Silent	0.000172171	NBEA	6581005-6581008-chr12-Intron-DEL-AAAC-AAAC--	0.000332128	CHD4	JAK3 35.0 UTR	0.000129759	JAK3	70089219-70089219-chr2-3'Flank-DEL-T-T--	1.05826e-05	PCBP1	MET 1706.0 Synonymous	0.000204775	MET
692	POLG Intron	0.000209158	POLG	6601979-6601981-chr12-In_Frame_Del-DEL-TCC-TCC--	0.000172055	CHD4	FUS 225.0 Intron	0.00033155	FUS	PAX3 34.0 UTR	0.000129751	PAX3	25678873-25678873-chr4-3'Flank-SNP-G-G-A	1.03435e-05	SLC34A2	73981255-73981255-chr4-Synonymous-SNP-G-G-A	0.000203884	PF4
693	PTCH1 Non_Silent	0.00020911	PTCH1	DAXX 32.0 Non_Silent	0.000171994	DAXX	KLK2 Intron	0.000331478	KLK2	SP8 UTR	0.000129232	SP8	97699105-97699105-chr9-5'Flank-SNP-G-G-T	1.03296e-05	XPA	TCF3 Synonymous	0.000203247	TCF3
694	PABPC1 253.0 Non_Silent	0.000208958	PABPC1	7673776-7673776-chr17-Missense_Mutation-SNP-G-G-A	0.000171948	TP53	FGFR1OP Intron	0.000331161	FGFR1OP	PCBP1 29.0 UTR	0.000128715	PCBP1	69757839-69757839-chr16-5'Flank-SNP-T-T-G	1.00764e-05	WWP2	ERC1 Synonymous	0.000202299	ERC1
695	KMT2C 2780.0 Intron	0.000208814	KMT2C	C5 1816.0 Non_Silent	0.000171101	C5	SUZ12 Intron	0.000330863	SUZ12	CCNE1 UTR	0.00012781	CCNE1	33010473-33010473-chr1-3'Flank-SNP-A-A-T	1.00063e-05	AK2	8886739-8886739-chr19-Synonymous-SNP-G-G-A	0.000200779	MUC16
696	39240895-39240898-chr22-Intron-DEL-TCTC-TCTC--	0.00020783	PDGFB	CCNE1 237.0 Non_Silent	0.000170079	CCNE1	GC Intron	0.000330753	GC	CDH11 UTR	0.000127484	CDH11	161310092-161310092-chr1-5'Flank-SNP-A-A-G	1.00007e-05	SDHC	PBRM1 Synonymous	0.000200495	PBRM1
697	ETV1 Non_Silent	0.0002078	ETV1	ZFHX3 105.0 Non_Silent	0.000170011	ZFHX3	MLLT1 Intron	0.000330489	MLLT1	HIF1A 1032.0 UTR	0.00012669	HIF1A	6666659-6666659-chr12-3'Flank-SNP-G-G-A	9.92743e-06	ZNF384	32332846-32332846-chr13-Synonymous-SNP-G-G-A	0.000200391	BRCA2
698	ARID2 3275.0 Intron	0.00020775	ARID2	CSF3R Non_Silent	0.000169782	CSF3R	SDC4 Intron	0.000329817	SDC4	HOXD11 UTR	0.000126296	HOXD11	35916930-35916930-chr17-3'Flank-SNP-C-C-T	9.64251e-06	RDM1	ERBB3 Synonymous	0.000199885	ERBB3
699	PTPN13 Intron	0.000207665	PTPN13	152238768-152238768-chr7-Missense_Mutation-SNP-T-T-C	0.000169743	KMT2C	C6 16.0 Intron	0.000328841	C6	HLF 9.0 UTR	0.000126018	HLF	HRAS Flank	9.58198e-06	HRAS	CARD11 Synonymous	0.000199804	CARD11
700	ARID1B 3978.0 Intron	0.000207267	ARID1B	RUNX1T1 737.0 Non_Silent	0.000169453	RUNX1T1	161673277-161673277-chr1-Intron-SNP-C-C-T	0.000328775	FCGR2B	AFF1 UTR	0.000125611	AFF1	10023742-10023742-chr3-5'Flank-SNP-C-C-T	9.58084e-06	FANCD2	BCLAF1 429.0 Synonymous	0.000199702	BCLAF1
701	MALT1 Intron	0.000207072	MALT1	FANCC Non_Silent	0.000168932	FANCC	RNF213 591.0 Intron	0.000327279	RNF213	TP53 UTR	0.000125528	TP53	32440108-32440108-chr11-5'Flank-SNP-C-C-A	9.257e-06	WT1	MUC4 775.0 Synonymous	0.000199197	MUC4
702	43090922-43090923-chr17-Intron-DEL-CA-CA--	0.000206921	BRCA1	8955464-8955464-chr19-Missense_Mutation-SNP-T-T-G	0.000167661	MUC16	AXIN1 Intron	0.000327235	AXIN1	53486073-53486079-chr5-3'UTR-DEL-AAAAAAA-AAAAAAA--	0.000125092	FST	9913314-9913314-chr17-3'Flank-SNP-G-G-C	9.21942e-06	GAS7	RGPD3 Synonymous	0.00019867	RGPD3
703	33012985-33012986-chr1-3'Flank-DEL-CA-CA--	0.000206266	AK2	100706893-100706893-chr8-Missense_Mutation-SNP-G-G-A	0.000167609	PABPC1	MECOM Intron	0.000326168	MECOM	202010991-202010991-chr1-5'UTR-SNP-C-C-G	0.000125064	ELF3	161379054-161379054-chr1-3'Flank-SNP-G-G-T	9.18003e-06	SDHC	ABL1 Synonymous	0.000198628	ABL1
704	FLCN Non_Silent	0.000206055	FLCN	106432991-106432991-chr2-Missense_Mutation-SNP-C-C-T	0.000167197	RGPD3	RSPO2 Intron	0.000325131	RSPO2	SS18L1 UTR	0.000124711	SS18L1	10734332-10734332-chr22-3'Flank-SNP-C-C-T	9.04834e-06	U2	TBL1X Synonymous	0.000198089	TBL1X
705	BCL9L 135.0 Intron	0.000205779	BCL9L	SLC34A2 414.0 Non_Silent	0.00016576	SLC34A2	12609137-12609138-chr3-Intron-DEL-TA-TA--	0.000324867	RAF1	HOXA9 19.0 UTR	0.00012365	HOXA9	36674265-36674265-chr6-5'Flank-SNP-G-G-T	9.03442e-06	CDKN1A	SS18L1 Synonymous	0.00019746	SS18L1
706	193142099-193142100-chr1-Intron-DEL-GA-GA--	0.000205535	CDC73	FKBP9 959.0 Non_Silent	0.000165691	FKBP9	ARID2 Intron	0.000324172	ARID2	MYH9 24.0 UTR	0.000123051	MYH9	AFF3 11908.0 Flank	8.99674e-06	AFF3	TRIP11 Synonymous	0.000196028	TRIP11
707	LPP Non_Silent	0.000204627	LPP	LEF1 Non_Silent	0.000165673	LEF1	115040907-115040908-chr9-Intron-DEL-AC-AC--	0.000323411	TNC	TNFAIP3 UTR	0.000122214	TNFAIP3	CNOT3 0.0 Flank	8.96402e-06	CNOT3	STAT6 Synonymous	0.000196026	STAT6
708	CNBD1 Intron	0.000203984	CNBD1	KMT2C 2777.0 Non_Silent	0.000165135	KMT2C	NTHL1 Intron	0.000323051	NTHL1	6465712-6465712-chr11-5'UTR-SNP-T-T-C	0.000120955	TRIM3	97700130-97700130-chr9-5'Flank-SNP-C-C-T	8.91396e-06	XPA	CDH17 990.0 Synonymous	0.000194672	CDH17
709	TRIM33 Intron	0.000203627	TRIM33	69651220-69651222-chr11-In_Frame_Del-DEL-GAG-GAG--	0.000164614	CCND1	RUNX1T1 Intron	0.00032284	RUNX1T1	17826516-17826519-chr19-3'UTR-DEL-AGAG-AGAG--	0.000120929	JAK3	167826123-167826123-chr6-5'Flank-SNP-T-T-C	8.8305e-06	MLLT4	AXIN2 Synonymous	0.000193982	AXIN2
710	10902097-10902097-chr16-Missense_Mutation-SNP-A-A-C	0.000203439	CIITA	77922196-77922196-chr9-Missense_Mutation-SNP-T-T-A	0.000164558	GNAQ	CCND3 Intron	0.000322765	CCND3	55755420-55755420-chr6-3'UTR-SNP-C-C-A	0.000119547	BMP5	10740031-10740031-chr22-5'Flank-SNP-G-G-A	8.79961e-06	U2	132886929-132886929-chr8-Synonymous-SNP-C-C-A	0.000193863	TG
711	GNA11 489.0 Intron	0.000203342	GNA11	A1CF Non_Silent	0.000164485	A1CF	152247734-152247734-chr7-Intron-SNP-A-A-T	0.000322249	KMT2C	NKX2-1 UTR	0.000118168	NKX2-1	169149546-169149546-chr3-5'Flank-SNP-A-A-C	8.76935e-06	MECOM	MUC4 670.0 Synonymous	0.000193727	MUC4
712	CLIP1 1107.0 Non_Silent	0.000203304	CLIP1	100709202-100709202-chr8-Missense_Mutation-SNP-A-A-G	0.000164094	PABPC1	40237955-40237955-chr19-Intron-SNP-A-A-C	0.000320642	AKT2	94439863-94439863-chr13-3'UTR-SNP-G-G-T	0.000117949	DCT	TH 159.0 Flank	8.59206e-06	TH	ARID1B 8574.0 Synonymous	0.000193091	ARID1B
713	BCLAF1 Non_Silent	0.000202977	BCLAF1	PRKCB Non_Silent	0.000163872	PRKCB	CHEK2 Intron	0.000319765	CHEK2	OLIG2 17.0 UTR	0.000117899	OLIG2	26033581-26033582-chr6-5'Flank-INS-----AAG	8.58966e-06	HIST1H3B	CLTC Synonymous	0.000192977	CLTC
714	92042078-92042079-chr7-Frame_Shift_Del-DEL-AG-AG--	0.000202792	AKAP9	EZR Non_Silent	0.000162633	EZR	77956752-77956753-chr1-Intron-DEL-CA-CA--	0.000318515	FUBP1	MLH1 3.0 UTR	0.000117009	MLH1	190179581-190179581-chr4-3'Flank-SNP-C-C-T	8.56993e-06	DUX4	APC Synonymous	0.000192201	APC
715	CARS Non_Silent	0.00020245	CARS	FGFR4 Non_Silent	0.000161883	FGFR4	CSMD3 379.0 Intron	0.000318493	CSMD3	DDX10 1.0 UTR	0.000116965	DDX10	NFIB Flank	8.55033e-06	NFIB	NCOA2 949.0 Synonymous	0.000191915	NCOA2
716	STAG1 Non_Silent	0.000202195	STAG1	CHEK2 Non_Silent	0.000161296	CHEK2	SDHA 760.0 Intron	0.000317911	SDHA	TSC2 823.0 UTR	0.000116608	TSC2	16076005-16076006-chr19-5'Flank-INS-----CA	8.34257e-06	TPM4	49033869-49033869-chr12-Synonymous-SNP-C-C-T	0.000191731	KMT2D
717	18263848-18263850-chr6-In_Frame_Del-DEL-TCC-TCC--	0.000201878	DEK	56882022-56882027-chr5-In_Frame_Del-DEL-CAACAA-CAACAA--	0.000160979	MAP3K1	50086368-50086371-chr12-Intron-DEL-GAGG-GAGG--	0.0003173	SMARCD1	BTG1 106.0 UTR	0.00011642	BTG1	USP8 1509.0 Flank	8.23837e-06	USP8	87232844-87232844-chr10-Synonymous-SNP-C-C-T	0.000191493	NUTM2A
718	KLF6 Non_Silent	0.000201641	KLF6	CUL3 Non_Silent	0.000160952	CUL3	EED Intron	0.000317018	EED	LMO1 783.0 UTR	0.000116123	LMO1	10026110-10026110-chr3-5'Flank-SNP-A-A-G	8.22967e-06	FANCD2	KDM5C 78.0 Synonymous	0.000191299	KDM5C
719	DCAF12 Intron	0.000200692	DCAF12	MAP3K1 1329.0 Non_Silent	0.000160943	MAP3K1	POLD1 Intron	0.000316589	POLD1	RPL10 1.0 UTR	0.000115298	RPL10	121546753-121546756-chr3-5'Flank-DEL-AAAA-AAAA--	8.12565e-06	POLQ	8910501-8910501-chr19-Synonymous-SNP-A-A-G	0.000190606	MUC16
720	RSPO2 Intron	0.000200688	RSPO2	PC Non_Silent	0.000160627	PC	MALT1 Intron	0.000315617	MALT1	MYCN 30.0 UTR	0.000113786	MYCN	6009196-6009196-chr7-5'Flank-SNP-G-G-A	8.07628e-06	PMS2	SMC1A Synonymous	0.000190164	SMC1A
721	92837512-92837514-chr14-Intron-DEL-TTG-TTG--	0.00020063	GOLGA5	BLM Non_Silent	0.000160512	BLM	LZTR1 Intron	0.000315459	LZTR1	54022276-54022277-chr8-5'UTR-INS-----GCG	0.000113	TCEA1	34893027-34893029-chr21-5'Flank-DEL-TTT-TTT--	7.85475e-06	RUNX1	RARA Synonymous	0.000189945	RARA
722	ZNF479 Non_Silent	0.000200582	ZNF479	ABL2 Non_Silent	0.000159917	ABL2	STAT5B 167.0 Intron	0.000314743	STAT5B	VHL 7.0 UTR	0.000111778	VHL	POLD1 675.0 Flank	7.81836e-06	POLD1	THRAP3 1296.0 Synonymous	0.000189383	THRAP3
723	114716209-114716209-chr1-Intron-SNP-C-C-G	0.00020023	NRAS	ASXL1 Non_Silent	0.000159841	ASXL1	POT1 Intron	0.000313956	POT1	LASP1 980.0 UTR	0.000111284	LASP1	13829183-13829183-chr1-3'Flank-SNP-G-G-C	7.80111e-06	PRDM2	90877691-90877691-chr9-Synonymous-SNP-G-G-C	0.000188773	SYK
724	NACA Intron	0.000200186	NACA	SPOP 404.0 Non_Silent	0.000159207	SPOP	KMT2C 1015.0 Intron	0.000313815	KMT2C	PIK3CA UTR	0.000110799	PIK3CA	IL6 0.0 Flank	7.75803e-06	IL6	110661809-110661809-chr2-Synonymous-SNP-G-G-T	0.0001883	BUB1
725	NR4A3 130.0 Non_Silent	0.000199988	NR4A3	ITGAV Non_Silent	0.000158756	ITGAV	LPP 5990.0 Intron	0.000313331	LPP	102875987-102875987-chr13-3'UTR-SNP-G-G-A	0.000109602	ERCC5	35916224-35916224-chr17-3'Flank-SNP-A-A-G	7.73183e-06	RDM1	8953259-8953259-chr19-Synonymous-SNP-G-G-A	0.000186916	MUC16
726	17027879-17027881-chr1-Intron-DEL-GAA-GAA--	0.00019929	SDHB	MYC 46.0 Non_Silent	0.000158674	MYC	SEPT9 777.0 Intron	0.000313264	SEPT9	LARP4B UTR	0.000109462	LARP4B	167976273-167976273-chr6-3'Flank-SNP-A-A-C	7.72439e-06	MLLT4	ERBB4 Synonymous	0.000186343	ERBB4
727	CANT1 UTR	0.000198748	CANT1	TMEM127 Non_Silent	0.000158471	TMEM127	158787210-158787211-chr6-Splice_Region-DEL-GA-GA--	0.000313262	EZR	PTCH1 UTR	0.0001086	PTCH1	3671191-3671191-chr11-3'Flank-SNP-G-G-T	7.7103e-06	NUP98	CREB3L1 Synonymous	0.000185116	CREB3L1
728	TBL1X Non_Silent	0.000198149	TBL1X	15931542-15931542-chr1-Missense_Mutation-SNP-G-G-A	0.000158414	SPEN	152229892-152229892-chr7-Intron-SNP-A-A-G	0.000313152	KMT2C	BUB1B UTR	0.000108596	BUB1B	8050748-8050748-chr10-5'Flank-SNP-G-G-T	7.62873e-06	GATA3	SLC34A2 Synonymous	0.000184756	SLC34A2
729	PDE4D UTR	0.000198035	PDE4D	13778600-13778602-chr1-In_Frame_Del-DEL-GAG-GAG--	0.000157556	PRDM2	256264-256264-chr5-Intron-SNP-C-C-T	0.000312622	SDHA	BRIP1 UTR	0.000108213	BRIP1	7750760-7750760-chr19-5'Flank-SNP-C-C-A	7.60387e-06	CD209	PRKCB Synonymous	0.000184662	PRKCB
730	ELN Intron	0.000196444	ELN	29320789-29320789-chr2-Missense_Mutation-SNP-A-A-C	0.00015725	ALK	DROSHA Intron	0.000312503	DROSHA	EIF1AX 346.0 UTR	0.00010786	EIF1AX	169083675-169083675-chr3-3'Flank-SNP-C-C-A	7.59644e-06	MECOM	58358072-58358072-chr17-Synonymous-SNP-C-C-T	0.000184071	RNF43
731	TNFRSF17 Intron	0.00019642	TNFRSF17	8917697-8917697-chr19-Missense_Mutation-SNP-G-G-A	0.000157171	MUC16	1803847-1803849-chr4-Intron-DEL-CTG-CTG--	0.000311301	FGFR3	CD274 UTR	0.000107213	CD274	36520050-36520050-chr14-5'Flank-SNP-C-C-T	7.5372e-06	NKX2-1	ESR1 5829.0 Synonymous	0.000183818	ESR1
732	2926832-2926833-chr7-Intron-DEL-GT-GT--	0.00019621	CARD11	POLG 346.0 Non_Silent	0.000156858	POLG	152273897-152273897-chr7-Intron-SNP-T-T-C	0.000310921	KMT2C	CDK6 UTR	0.000107171	CDK6	NTRK1 417.0 Flank	7.53616e-06	NTRK1	EPHA3 Synonymous	0.000183346	EPHA3
733	BCORL1 Non_Silent	0.0001962	BCORL1	TRIM27 Non_Silent	0.000156724	TRIM27	HSP90AB1 Intron	0.000310539	HSP90AB1	TPR 19.0 UTR	0.000106836	TPR	TNN Flank	7.37869e-06	TNN	TEC Synonymous	0.000180935	TEC
734	MSI2 37.0 Intron	0.000195827	MSI2	TCF3 Non_Silent	0.000156399	TCF3	TFRC Intron	0.000310204	TFRC	TRIM33 UTR	0.000106808	TRIM33	283017-283017-chr16-3'Flank-SNP-G-G-T	7.37599e-06	AXIN1	MLLT4 Synonymous	0.000180785	MLLT4
735	CDC73 Intron	0.000195707	CDC73	NCOA2 Non_Silent	0.000155444	NCOA2	GOLGA5 446.0 Intron	0.000310167	GOLGA5	PRPF4 323.0 UTR	0.000106637	PRPF4	36479529-36479529-chr1-5'Flank-SNP-G-G-T	7.3207e-06	CSF3R	57091656-57091656-chr12-Synonymous-SNP-G-G-C	0.000180018	NAB2
736	SMARCB1 Intron	0.000195173	SMARCB1	FOXO1 Non_Silent	0.000154934	FOXO1	NRAS Intron	0.000310008	NRAS	DRG1 1.0 UTR	0.000106438	DRG1	CAMTA1 Flank	7.23639e-06	CAMTA1	PTPN11 Synonymous	0.000179997	PTPN11
737	AKT3 Intron	0.000195172	AKT3	PRPF40B Non_Silent	0.000154528	PRPF40B	131988785-131988785-chr5-Intron-SNP-T-T-G	0.000309683	ACSL6	29945548-29945548-chr6-3'UTR-SNP-C-C-T	0.000106415	HLA-A	LARP4B Flank	7.13245e-06	LARP4B	NCOR1 Synonymous	0.00017964	NCOR1
738	FGFR3 Intron	0.000194859	FGFR3	LMNA Non_Silent	0.000153817	LMNA	TRIM33 105.0 Intron	0.000309638	TRIM33	MYB UTR	0.000106118	MYB	SPECC1 0.0 Flank	6.84297e-06	SPECC1	SPEN 1831.0 Synonymous	0.000179535	SPEN
739	USP8 1369.0 Non_Silent	0.000194714	USP8	TRIP11 Non_Silent	0.000153256	TRIP11	IL6ST Intron	0.000308422	IL6ST	JUN 25.0 UTR	0.000105134	JUN	53415640-53415641-chr12-3'Flank-DEL-AA-AA--	6.76169e-06	SP1	64192843-64192843-chrX-Synonymous-SNP-A-A-C	0.000179115	AMER1
740	KIF5B Intron	0.000194349	KIF5B	KDM5A Non_Silent	0.000152302	KDM5A	CYLD 810.0 Intron	0.000308212	CYLD	ACVR1 20.0 UTR	0.000104712	ACVR1	121546022-121546022-chr3-5'Flank-SNP-C-C-A	6.74391e-06	POLQ	CIITA Synonymous	0.000178213	CIITA
741	LMNA Non_Silent	0.000193913	LMNA	UTY Non_Silent	0.000151552	UTY	KMT2C 2602.0 Intron	0.000308028	KMT2C	PSD UTR	0.000104479	PSD	MSH6 0.0 Flank	6.71345e-06	MSH6	ELL Synonymous	0.000177255	ELL
742	USP8 1370.0 Synonymous	0.000193898	USP8	LAT Non_Silent	0.000150491	LAT	BLM Intron	0.000306482	BLM	PRKAR1A UTR	0.000103845	PRKAR1A	6664622-6664622-chr12-3'Flank-SNP-A-A-C	6.70714e-06	ZNF384	IKBKB Synonymous	0.000177016	IKBKB
743	MTA1 Intron	0.000193669	MTA1	108688937-108688937-chr11-Missense_Mutation-SNP-A-A-C	0.000150352	DDX10	29944103-29944103-chr6-Intron-SNP-T-T-A	0.000306301	HLA-A	HERPUD1 4.0 UTR	0.000103421	HERPUD1	NR4A3 865.0 Flank	6.68183e-06	NR4A3	KAT6A Synonymous	0.00017683	KAT6A
744	KL Synonymous	0.000193605	KL	136268287-136268287-chr6-Missense_Mutation-SNP-G-G-T	0.000149207	BCLAF1	FCRL4 Intron	0.000305734	FCRL4	ITK UTR	0.00010323	ITK	190179552-190179552-chr4-3'Flank-SNP-G-G-T	6.66166e-06	DUX4	32092970-32092970-chr14-Synonymous-SNP-T-T-C	0.000176707	ARHGAP5
745	TNN Synonymous	0.000193575	TNN	IRS4 76.0 Non_Silent	0.000147667	IRS4	POLD1 645.0 Intron	0.000305205	POLD1	QKI 11.0 UTR	0.000102491	QKI	125189931-125189931-chr9-5'Flank-SNP-G-G-T	6.60521e-06	PPP6C	FUBP1 Synonymous	0.000175376	FUBP1
746	NOTCH1 Non_Silent	0.000193352	NOTCH1	TFEB Non_Silent	0.000146823	TFEB	FANCG Intron	0.000305144	FANCG	FAS 4.0 UTR	0.000102325	FAS	KMT2A 0.0 Flank	6.44623e-06	KMT2A	RGS7 Synonymous	0.000174071	RGS7
747	HOXA1 Non_Silent	0.000193204	HOXA1	100706910-100706910-chr8-Missense_Mutation-SNP-C-C-T	0.000145314	PABPC1	NCOR2 65.0 Intron	0.000304656	NCOR2	PRKCB UTR	0.000100957	PRKCB	7736475-7736480-chr19-3'Flank-DEL-TCCTTC-TCCTTC--	6.23953e-06	CD209	SIRPA 407.0 Synonymous	0.000171698	SIRPA
748	GNAS 9.0 UTR	0.000192895	GNAS	10825121-10825121-chr19-Missense_Mutation-SNP-T-T-G	0.000144267	DNM2	DDX6 Intron	0.000304019	DDX6	DCAF12L2 UTR	0.000100263	DCAF12L2	6664626-6664626-chr12-3'Flank-SNP-A-A-G	6.14362e-06	ZNF384	ACKR3 Synonymous	0.000171022	ACKR3
749	PDE4D 146.0 Intron	0.000192717	PDE4D	TCF3 131.0 Non_Silent	0.000143986	TCF3	MGA Intron	0.000303188	MGA	SPOP 29.0 UTR	9.89494e-05	SPOP	MTCP1 0.0 Flank	5.9517e-06	MTCP1	ARID1A 1406.0 Synonymous	0.000169235	ARID1A
750	ERBB4 Non_Silent	0.000192567	ERBB4	FUS Non_Silent	0.000143847	FUS	RSF1 Intron	0.000302328	RSF1	APC UTR	9.88197e-05	APC	32383379-32383379-chr11-3'Flank-SNP-A-A-G	5.9376e-06	WT1	63355558-63355558-chr18-Synonymous-SNP-C-C-T	0.000168834	KDSR
751	COL3A1 Intron	0.000192251	COL3A1	TRIM24 2146.0 Non_Silent	0.000143826	TRIM24	COL2A1 431.0 Intron	0.000301916	COL2A1	BLM UTR	9.85631e-05	BLM	118754534-118754534-chr11-3'Flank-SNP-G-G-A	5.88549e-06	DDX6	MSH6 Synonymous	0.000168768	MSH6
752	RSF1 Intron	0.0001914	RSF1	PCM1 Non_Silent	0.000143815	PCM1	EXT2 2799.0 Intron	0.000301622	EXT2	NUMA1 UTR	9.84381e-05	NUMA1	110633983-110633983-chr2-3'Flank-DEL-A-A--	5.88436e-06	BUB1	ATP1A1 Synonymous	0.00016837	ATP1A1
753	FAT1 Synonymous	0.000191216	FAT1	6222261-6222263-chr19-In_Frame_Del-DEL-AGG-AGG--	0.000142954	MLLT1	PIK3CA Intron	0.000300203	PIK3CA	29694817-29694817-chr22-3'UTR-SNP-A-A-C	9.83817e-05	NF2	154193580-154193581-chr1-5'Flank-INS-----G	5.8477e-06	TPM3	WRN Synonymous	0.000167601	WRN
754	TNN Intron	0.000190907	TNN	KLF6 Non_Silent	0.000142769	KLF6	BCORL1 Intron	0.000299628	BCORL1	CEP89 UTR	9.82341e-05	CEP89	150808330-150808330-chr1-3'Flank-SNP-A-A-G	5.84396e-06	ARNT	PDGFRA Synonymous	0.000167211	PDGFRA
755	CASC5 565.0 Non_Silent	0.000190904	CASC5	140653008-140653009-chr5-Frame_Shift_Del-DEL-GA-GA--	0.0001419	IK	KMT2C 2018.0 Intron	0.000299043	KMT2C	CCNB1IP1 UTR	9.76011e-05	CCNB1IP1	121477868-121477868-chr10-3'Flank-SNP-G-G-A	5.61765e-06	FGFR2	F7 Synonymous	0.000167105	F7
756	VAV1 Intron	0.000190847	VAV1	MUC16 1760.0 Non_Silent	0.000141102	MUC16	COL3A1 440.0 Intron	0.000298423	COL3A1	TCF7 UTR	9.7083e-05	TCF7	IDH1 Flank	5.60062e-06	IDH1	PSD 286.0 Synonymous	0.000166533	PSD
757	ETV6 Intron	0.000189989	ETV6	HLA-A 45.0 Non_Silent	0.000141012	HLA-A	47224248-47224249-chr1-Intron-DEL-AC-AC--	0.00029829	TAL1	HLA-A 88.0 UTR	9.67295e-05	HLA-A	WWP2 3590.0 Flank	5.57569e-06	WWP2	52609669-52609669-chr3-Synonymous-SNP-T-T-C	0.000165628	PBRM1
758	MAPK1 Intron	0.000189524	MAPK1	100705591-100705591-chr8-Missense_Mutation-SNP-A-A-G	0.000140919	PABPC1	HIF1A Intron	0.000296876	HIF1A	TF 10.0 UTR	9.63611e-05	TF	122380647-122380648-chr12-5'Flank-INS-----CTTATCCT	5.45197e-06	CLIP1	MAP2K2 Synonymous	0.000165431	MAP2K2
759	KMT2C 2019.0 Non_Silent	0.000189505	KMT2C	MKL1 213.0 Non_Silent	0.000140861	MKL1	TRAF7 415.0 Intron	0.000296575	TRAF7	CD28 1.0 UTR	9.60788e-05	CD28	MYCL 0.0 Flank	5.35978e-06	MYCL	HMGA1 Synonymous	0.000164444	HMGA1
760	SEPT5 Intron	0.000189189	SEPT5	7674250-7674250-chr17-Missense_Mutation-SNP-C-C-A	0.000140281	TP53	SRSF3 Intron	0.00029584	SRSF3	DDX5 UTR	9.60541e-05	DDX5	IL6ST 826.0 Flank	5.31073e-06	IL6ST	TAF15 Synonymous	0.000162841	TAF15
761	LMNA Intron	0.000189164	LMNA	ZEB1 Non_Silent	0.0001402	ZEB1	DDX3X 113.0 Intron	0.000295351	DDX3X	VTI1A UTR	9.54568e-05	VTI1A	CCR7 0.0 Flank	5.30687e-06	CCR7	DROSHA Synonymous	0.0001625	DROSHA
762	ECT2 Intron	0.000188747	ECT2	CSF3R 157.0 Non_Silent	0.00014001	CSF3R	128239932-128239933-chr6-Intron-DEL-CA-CA--	0.000294903	PTPRK	BAP1 UTR	9.53535e-05	BAP1	93320226-93320226-chr9-3'Flank-SNP-C-C-A	5.19254e-06	WNK2	HLA-A 42.0 Synonymous	0.000162353	HLA-A
763	ERCC5 UTR	0.000188724	ERCC5	10064848-10064848-chr3-Missense_Mutation-SNP-C-C-T	0.000139506	FANCD2	5130511-5130511-chr17-Intron-SNP-A-A-C	0.000294817	USP6	VHL UTR	9.50158e-05	VHL	CCR7 236.0 Flank	4.98006e-06	CCR7	NFATC2 Synonymous	0.000162311	NFATC2
764	44236159-44236160-chr11-Intron-DEL-GT-GT--	0.000188619	EXT2	LIFR 141.0 Non_Silent	0.00013917	LIFR	KAT6B Intron	0.000294213	KAT6B	IL7R 3.0 UTR	9.40129e-05	IL7R	28984982-28984982-chr16-5'Flank-SNP-T-T-G	4.96006e-06	LAT	NR4A3 Synonymous	0.000162168	NR4A3
765	FLNA Non_Silent	0.000188217	FLNA	CBLB Non_Silent	0.000138252	CBLB	2173867-2173867-chr16-Intron-SNP-A-A-C	0.000294101	TRAF7	53486073-53486078-chr5-3'UTR-DEL-AAAAAA-AAAAAA--	9.38224e-05	FST	MSH6 Flank	4.93034e-06	MSH6	TERT Synonymous	0.000162165	TERT
766	6581005-6581008-chr12-Intron-DEL-AAAC-AAAC--	0.000187261	CHD4	AXIN1 Non_Silent	0.000137819	AXIN1	KAT6A 224.0 Intron	0.000293825	KAT6A	TCEA1 UTR	9.37738e-05	TCEA1	35917470-35917470-chr17-3'Flank-SNP-A-A-G	4.87583e-06	RDM1	8886787-8886787-chr19-Synonymous-SNP-C-C-T	0.000161945	MUC16
767	KDM5C Non_Silent	0.000187158	KDM5C	PRF1 Non_Silent	0.000137641	PRF1	SF3B1 Intron	0.000293747	SF3B1	PPP6C 865.0 UTR	9.32721e-05	PPP6C	190179543-190179543-chr4-3'Flank-SNP-T-T-C	4.7511e-06	DUX4	177294271-177294271-chr5-Synonymous-SNP-G-G-C	0.000161893	NSD1
768	WWTR1 444.0 Non_Silent	0.000186788	WWTR1	FOXA1 Non_Silent	0.00013762	FOXA1	STRN Intron	0.000293614	STRN	AKT1 UTR	9.32347e-05	AKT1	8140435-8140435-chr17-3'Flank-SNP-C-C-T	4.74065e-06	PER1	PCBP1 Synonymous	0.000161268	PCBP1
769	ERCC5 Intron	0.000186174	ERCC5	DGCR8 Non_Silent	0.00013708	DGCR8	2926832-2926833-chr7-Intron-DEL-GT-GT--	0.000293103	CARD11	WWTR1 UTR	9.15916e-05	WWTR1	6666687-6666687-chr12-3'Flank-SNP-T-T-G	4.73184e-06	ZNF384	195781044-195781044-chr3-Synonymous-SNP-T-T-C	0.000160928	MUC4
770	LRP1 Non_Silent	0.000186147	LRP1	1915243-1915243-chr20-Missense_Mutation-SNP-G-G-C	0.000137052	SIRPA	NF2 Intron	0.000292046	NF2	GLI1 UTR	9.10764e-05	GLI1	131947683-131947683-chr5-3'Flank-SNP-C-C-T	4.70584e-06	ACSL6	ASXL2 Synonymous	0.000160867	ASXL2
771	13778600-13778602-chr1-In_Frame_Del-DEL-GAG-GAG--	0.000185689	PRDM2	6197725-6197725-chr1-Frame_Shift_Del-DEL-T-T--	0.00013693	RPL22	OXR1 Intron	0.000291829	OXR1	RGS7 12.0 UTR	9.07126e-05	RGS7	190179616-190179616-chr4-3'Flank-SNP-C-C-A	4.63597e-06	DUX4	136278266-136278266-chr6-Synonymous-SNP-T-T-C	0.000160256	BCLAF1
772	236538-236538-chr5-Synonymous-SNP-C-C-A	0.000184918	SDHA	HLA-A 33.0 Non_Silent	0.000136464	HLA-A	ARID1B Intron	0.000290379	ARID1B	DROSHA UTR	9.05426e-05	DROSHA	SPEN Flank	4.60754e-06	SPEN	PRDM1 Synonymous	0.000159492	PRDM1
773	NUP214 42.0 Non_Silent	0.000184821	NUP214	45650580-45650580-chr11-Missense_Mutation-SNP-A-A-C	0.000136409	CHST1	RAD21 Intron	0.000290252	RAD21	TSC1 UTR	9.03847e-05	TSC1	HMGA2 Flank	4.46719e-06	HMGA2	ZNF479 17.0 Synonymous	0.000158925	ZNF479
774	DICER1 Synonymous	0.000184622	DICER1	MUC16 1748.0 Non_Silent	0.000136238	MUC16	PRPF4 Intron	0.000289745	PRPF4	GRIN2A UTR	8.99325e-05	GRIN2A	MSI2 Flank	4.4502e-06	MSI2	AFF3 9230.0 Synonymous	0.000158773	AFF3
775	14178466-14178468-chr3-In_Frame_Del-DEL-CCT-CCT--	0.000184343	XPC	TNC 867.0 Non_Silent	0.000135883	TNC	77320210-77320212-chr17-Intron-DEL-GAG-GAG--	0.000288578	SEPT9	55265435-55265436-chr17-5'UTR-INS-----TTTC	8.97206e-05	HLF	10738707-10738707-chr22-5'Flank-SNP-A-A-G	4.36031e-06	U2	CYLD Synonymous	0.000158247	CYLD
776	66850937-66850938-chr11-Intron-DEL-GA-GA--	0.000184175	PC	PARG Non_Silent	0.000135503	PARG	HLA-A 73.0 Intron	0.000288562	HLA-A	SALL4 UTR	8.90671e-05	SALL4	190179665-190179665-chr4-3'Flank-SNP-C-C-A	4.18297e-06	DUX4	FNBP1 Synonymous	0.000157952	FNBP1
777	RDM1 0.0 Flank	0.000183891	RDM1	147486029-147486029-chr7-Missense_Mutation-SNP-A-A-C	0.000134958	CNTNAP2	TG 5303.0 Intron	0.000287735	TG	20622296-20622296-chr9-5'UTR-DEL-C-C--	8.88231e-05	MLLT3	41752015-41752015-chr4-5'Flank-SNP-G-G-A	4.12104e-06	PHOX2B	8886805-8886805-chr19-Synonymous-SNP-C-C-A	0.000156049	MUC16
778	FANCD2 435.0 Intron	0.000183729	FANCD2	FOXP1 Non_Silent	0.000134318	FOXP1	CSF3R Intron	0.000287075	CSF3R	TFRC UTR	8.74474e-05	TFRC	MYCL Flank	4.03597e-06	MYCL	28986184-28986184-chr16-Synonymous-SNP-A-A-C	0.000155815	LAT
779	ARID1A 1554.0 Non_Silent	0.000183704	ARID1A	CDKN2A 140.0 Non_Silent	0.000133918	CDKN2A	PPARG Intron	0.000286179	PPARG	EZH2 5.0 UTR	8.70172e-05	EZH2	HOXD11 0.0 Flank	3.98492e-06	HOXD11	CNOT3 Synonymous	0.000155146	CNOT3
780	KDM5C Intron	0.000183516	KDM5C	EZH2 Non_Silent	0.000132749	EZH2	ACSL6 661.0 Intron	0.000285653	ACSL6	7740648-7740648-chr19-3'UTR-SNP-G-G-A	8.63455e-05	CD209	FGFR2 0.0 Flank	3.90458e-06	FGFR2	152235880-152235880-chr7-Synonymous-SNP-C-C-T	0.000154685	KMT2C
781	BCLAF1 Intron	0.000183217	BCLAF1	SND1 Non_Silent	0.000132638	SND1	NUTM1 Intron	0.000285339	NUTM1	36282407-36282407-chr22-3'UTR-SNP-C-C-G	8.63263e-05	MYH9	MUC4 Flank	3.87628e-06	MUC4	MYO5A Synonymous	0.000154632	MYO5A
782	136275718-136275719-chr6-Intron-DEL-AC-AC--	0.000182965	BCLAF1	29944124-29944124-chr6-Missense_Mutation-SNP-C-C-G	0.000132414	HLA-A	TFEB Intron	0.00028481	TFEB	HOXA9 23.0 UTR	8.59915e-05	HOXA9	2565210-2565210-chr1-3'Flank-SNP-C-C-G	3.86381e-06	TNFRSF14	BCL6 136.0 Synonymous	0.000153887	BCL6
783	LZTR1 Intron	0.000182826	LZTR1	100712766-100712767-chr8-Frame_Shift_Ins-INS-----A	0.000132059	PABPC1	10981587-10981588-chr5-Intron-DEL-AC-AC--	0.000284665	CTNND2	161677743-161677743-chr1-3'UTR-SNP-A-A-G	8.54275e-05	FCGR2B	KMT2D Flank	3.80248e-06	KMT2D	MEN1 Synonymous	0.000153864	MEN1
784	NIN Non_Silent	0.000182763	NIN	106423256-106423256-chr2-Missense_Mutation-SNP-C-C-T	0.000131902	RGPD3	DCTN1 Intron	0.000284491	DCTN1	11891261-11891261-chr12-3'UTR-SNP-T-T-C	8.46203e-05	ETV6	190179551-190179551-chr4-3'Flank-SNP-G-G-A	3.792e-06	DUX4	ERG Synonymous	0.000153579	ERG
785	ANK1 1109.0 Intron	0.000182045	ANK1	27798946-27798948-chr22-In_Frame_Del-DEL-TGC-TGC--	0.000131732	MN1	KAT7 Intron	0.00028401	KAT7	HOXD1 32.0 UTR	8.4492e-05	HOXD1	CDH11 2395.0 Flank	3.75535e-06	CDH11	10049469-10049469-chr3-Synonymous-SNP-C-C-T	0.000152718	FANCD2
786	MUC16 760.0 Non_Silent	0.000181951	MUC16	NUTM2A 68.0 Non_Silent	0.000131343	NUTM2A	RALGDS Intron	0.000282953	RALGDS	127196075-127196075-chr6-3'UTR-SNP-C-C-T	8.41427e-05	RSPO3	LSM14A Flank	3.71946e-06	LSM14A	195783891-195783891-chr3-Synonymous-SNP-G-G-A	0.000152081	MUC4
787	PRPF4 Intron	0.000180596	PRPF4	SH3GL1 Non_Silent	0.000130494	SH3GL1	NT5C2 Intron	0.000282729	NT5C2	BCL2L12 166.0 UTR	8.39349e-05	BCL2L12	64497049-64497049-chr17-3'Flank-SNP-A-A-G	3.66127e-06	DDX5	10829221-10829221-chr19-Synonymous-SNP-A-A-C	0.000151977	DNM2
788	BRCA2 Intron	0.000180207	BRCA2	CLIP1 1767.0 Non_Silent	0.000129936	CLIP1	TFPT Intron	0.000281824	TFPT	MYCL UTR	8.28627e-05	MYCL	MECOM 11576.0 Flank	3.64579e-06	MECOM	SPEN 1763.0 Synonymous	0.000151742	SPEN
789	MSH2 Intron	0.000180017	MSH2	OXR1 Non_Silent	0.000129342	OXR1	MLF1 Intron	0.000281789	MLF1	18264427-18264427-chr6-5'UTR-SNP-G-G-A	8.17594e-05	DEK	201286677-201286677-chr2-3'Flank-SNP-G-G-A	3.63448e-06	CASP8	IRF4 Synonymous	0.000150995	IRF4
790	FGFR1 Intron	0.000179719	FGFR1	36300902-36300904-chr22-In_Frame_Del-DEL-CTC-CTC--	0.000128943	MYH9	PSIP1 Intron	0.000280588	PSIP1	AXIN2 UTR	8.15968e-05	AXIN2	58889222-58889223-chr20-5'Flank-INS-----CGGCG	3.56745e-06	GNAS	RUNX1T1 Synonymous	0.000150536	RUNX1T1
791	ARHGAP26 Intron	0.000179499	ARHGAP26	38428396-38428398-chr8-In_Frame_Del-DEL-TCA-TCA--	0.00012882	FGFR1	CTNNA2 5161.0 Intron	0.000279966	CTNNA2	STAT5B 48.0 UTR	8.14694e-05	STAT5B	DDX5 140.0 Flank	3.56533e-06	DDX5	BCL9 1566.0 Synonymous	0.000150148	BCL9
792	6600591-6600591-chr12-Missense_Mutation-SNP-T-T-G	0.000179418	CHD4	KMT2C 2264.0 Non_Silent	0.000128798	KMT2C	ITK 1256.0 Intron	0.000279802	ITK	TCP1 221.0 UTR	8.08945e-05	TCP1	CIITA 0.0 Flank	3.52324e-06	CIITA	NTRK1 Synonymous	0.000150071	NTRK1
793	MDM2 Intron	0.000179236	MDM2	COA1 Non_Silent	0.00012799	COA1	27650165-27650166-chr12-Intron-DEL-CT-CT--	0.000279448	PPFIBP1	TK1 12.0 UTR	7.99204e-05	TK1	APOBEC3B Flank	3.48787e-06	APOBEC3B	29944375-29944375-chr6-Synonymous-SNP-C-C-A	0.000149768	HLA-A
794	MSH2 1560.0 Intron	0.000178885	MSH2	175077488-175077488-chr1-Missense_Mutation-SNP-G-G-C	0.000127109	TNN	PTPRK 5366.0 Intron	0.000278805	PTPRK	PHF6 1043.0 UTR	7.98552e-05	PHF6	MLF1 0.0 Flank	3.47046e-06	MLF1	169381418-169381418-chr3-Synonymous-SNP-A-A-G	0.000149577	MECOM
795	77596796-77596799-chr3-Intron-DEL-TTTT-TTTT--	0.00017868	ROBO2	ELL Non_Silent	0.000126803	ELL	PTPRB 2395.0 Intron	0.00027879	PTPRB	SDHAF2 UTR	7.89372e-05	SDHAF2	75741050-75741050-chr7-5'Flank-SNP-T-T-C	3.26956e-06	HIP1	PPM1D Synonymous	0.000149365	PPM1D
796	FAH Intron	0.000178391	FAH	29944154-29944154-chr6-Missense_Mutation-SNP-A-A-G	0.000125924	HLA-A	10047796-10047796-chr3-Intron-SNP-C-C-T	0.000278693	FANCD2	BRD3 465.0 UTR	7.87375e-05	BRD3	157875489-157875494-chr2-5'Flank-DEL-ACACAC-ACACAC--	3.26261e-06	ACVR1	8910438-8910438-chr19-Synonymous-SNP-C-C-T	0.000148321	MUC16
797	NFIB Intron	0.000178122	NFIB	40420883-40420885-chr22-In_Frame_Del-DEL-TGC-TGC--	0.000125693	MKL1	CREBBP Intron	0.000278365	CREBBP	ACSL3 UTR	7.85092e-05	ACSL3	CR1 0.0 Flank	3.11828e-06	CR1	LAT 17.0 Synonymous	0.000148245	LAT
798	DROSHA Intron	0.000177996	DROSHA	NPM1 Non_Silent	0.000124937	NPM1	SIRPA Intron	0.000277972	SIRPA	36993455-36993455-chr3-5'UTR-SNP-G-G-A	7.81314e-05	MLH1	190179652-190179652-chr4-3'Flank-SNP-C-C-T	3.09468e-06	DUX4	HIF1A Synonymous	0.000148079	HIF1A
799	TERT Intron	0.00017798	TERT	RET Non_Silent	0.000124842	RET	PMS1 Intron	0.000276896	PMS1	TET1 234.0 UTR	7.80753e-05	TET1	190179685-190179685-chr4-3'Flank-SNP-C-C-T	3.06211e-06	DUX4	CREB3 Synonymous	0.000147453	CREB3
800	SETBP1 Non_Silent	0.000177643	SETBP1	33320121-33320123-chr6-In_Frame_Del-DEL-TCC-TCC--	0.000124616	DAXX	FOXO1 Intron	0.000274502	FOXO1	RANBP2 UTR	7.79183e-05	RANBP2	113215724-113215725-chr2-3'Flank-INS-----C	2.87943e-06	PAX8	45850943-45850943-chr12-Synonymous-SNP-A-A-C	0.000147251	ARID2
801	KMT2C 2606.0 Synonymous	0.000177624	KMT2C	PTPRC Non_Silent	0.000123589	PTPRC	BRD3 Intron	0.000273803	BRD3	TLX3 UTR	7.76047e-05	TLX3	125316277-125316277-chr4-5'Flank-SNP-T-T-G	2.82714e-06	FAT4	ANK1 1452.0 Synonymous	0.000146699	ANK1
802	CHD2 Intron	0.00017755	CHD2	207614451-207614451-chr1-Missense_Mutation-SNP-T-T-C	0.000123313	CR1	76434936-76434936-chr3-Intron-SNP-A-A-C	0.000273698	ROBO2	3069248-3069248-chr1-5'UTR-SNP-C-C-G	7.69957e-05	PRDM16	190179539-190179539-chr4-3'Flank-SNP-G-G-T	2.81147e-06	DUX4	29220745-29220745-chr2-Synonymous-SNP-T-T-C	0.000146323	ALK
803	KAT6A Intron	0.000177435	KAT6A	179218303-179218303-chr3-Missense_Mutation-SNP-G-G-A	0.000122606	PIK3CA	118909876-118909877-chr11-Intron-DEL-CA-CA--	0.000272713	BCL9L	15946143-15946143-chr2-3'UTR-DEL-T-T--	7.69732e-05	MYCN	33299630-33299630-chr19-3'Flank-SNP-C-C-A	2.71218e-06	CEBPA	17831254-17831254-chr19-Synonymous-SNP-G-G-C	0.000145594	JAK3
804	NPM1 Intron	0.000177152	NPM1	58782452-58782454-chr1-In_Frame_Del-DEL-GCT-GCT--	0.000122605	JUN	ACSL6 660.0 Intron	0.000272226	ACSL6	21505693-21505693-chr19-5'UTR-SNP-C-C-T	7.63784e-05	ZNF429	SP8 0.0 Flank	2.61836e-06	SP8	PMS2 Synonymous	0.000145479	PMS2
805	8886739-8886739-chr19-Synonymous-SNP-G-G-A	0.000177097	MUC16	77652292-77652294-chrX-In_Frame_Del-DEL-TCC-TCC--	0.00012221	ATRX	RUNX1 Intron	0.000271333	RUNX1	186312564-186312564-chr1-3'UTR-SNP-T-T-G	7.59384e-05	TPR	23322683-23322683-chr22-3'Flank-DEL-T-T--	2.59832e-06	BCR	MAML2 2310.0 Synonymous	0.000145209	MAML2
806	ERBB4 4968.0 Intron	0.000177068	ERBB4	SDHA 725.0 Non_Silent	0.00012208	SDHA	P2RY8 Intron	0.00027083	P2RY8	EED UTR	7.4409e-05	EED	POU5F1 129.0 Flank	2.57968e-06	POU5F1	EPS15 Synonymous	0.000142814	EPS15
807	100705027-100705027-chr8-Missense_Mutation-SNP-T-T-A	0.000176916	PABPC1	CDK12 1374.0 Non_Silent	0.000121509	CDK12	CARS 386.0 Intron	0.000270148	CARS	EPHA3 7441.0 UTR	7.34391e-05	EPHA3	TG 5360.0 Flank	2.57924e-06	TG	21445735-21445735-chr22-Synonymous-SNP-G-G-C	0.000142684	HIC2
808	WWP2 Intron	0.000176765	WWP2	RBM10 747.0 Non_Silent	0.000121495	RBM10	PBRM1 2007.0 Intron	0.000269838	PBRM1	DCAF12 UTR	7.34008e-05	DCAF12	FAM47C 67.0 Flank	2.3925e-06	FAM47C	EZH2 Synonymous	0.000142673	EZH2
809	MUC16 760.0 Synonymous	0.000176248	MUC16	152248206-152248206-chr7-Missense_Mutation-SNP-G-G-A	0.000121398	KMT2C	8896101-8896102-chr19-Intron-INS-----C	0.00026963	MUC16	FKBP9 UTR	7.31885e-05	FKBP9	DROSHA 2574.0 Flank	2.39061e-06	DROSHA	KL Synonymous	0.000142152	KL
810	131164195-131164196-chr9-Intron-DEL-GT-GT--	0.000175867	NUP214	8886843-8886843-chr19-Missense_Mutation-SNP-C-C-T	0.000120992	MUC16	F12 Intron	0.000269194	F12	RCC2 UTR	7.2435e-05	RCC2	MSI2 8565.0 Flank	2.38803e-06	MSI2	256357-256357-chr5-Synonymous-SNP-G-G-A	0.000140652	SDHA
811	KMT2C 2262.0 Non_Silent	0.000175712	KMT2C	TP63 Non_Silent	0.000120852	TP63	GPHN Intron	0.000268637	GPHN	MSH6 510.0 UTR	7.13535e-05	MSH6	167825790-167825790-chr6-5'Flank-SNP-C-C-A	2.37451e-06	MLLT4	MUTYH Synonymous	0.000140553	MUTYH
812	COL1A1 Non_Silent	0.000175704	COL1A1	57091663-57091663-chr12-Missense_Mutation-SNP-T-T-C	0.000120616	NAB2	TCP1 Intron	0.000268081	TCP1	CCNB1 UTR	7.12462e-05	CCNB1	FBLN2 Flank	2.37449e-06	FBLN2	153580160-153580160-chrX-Synonymous-SNP-G-G-C	0.000139987	ATP2B3
813	RALGDS Synonymous	0.000175523	RALGDS	TRIM24 2147.0 Non_Silent	0.00012053	TRIM24	LSM1 Intron	0.000267458	LSM1	BCL2L12 1.0 UTR	7.12424e-05	BCL2L12	RCC2 0.0 Flank	2.3614e-06	RCC2	MTA1 Synonymous	0.000139519	MTA1
814	FAT3 0.0 Flank	0.000175421	FAT3	SMARCA4 1040.0 Non_Silent	0.00012052	SMARCA4	KDM5C Intron	0.000267286	KDM5C	BCL3 UTR	7.09635e-05	BCL3	119616767-119616767-chrX-3'Flank-SNP-G-G-T	2.3596e-06	SEPT6	ALB Synonymous	0.000139234	ALB
815	TRAF7 363.0 Intron	0.000175406	TRAF7	REL Non_Silent	0.000120345	REL	SF1 Intron	0.000267093	SF1	SPEN UTR	7.08675e-05	SPEN	53380176-53380176-chr12-5'Flank-SNP-A-A-C	2.23827e-06	SP1	NT5C Synonymous	0.000139144	NT5C
816	CTNNB1 Intron	0.000175397	CTNNB1	EIF4A2 Non_Silent	0.000120337	EIF4A2	MUT Intron	0.000266031	MUT	ZNF521 UTR	7.03929e-05	ZNF521	ZNF429 652.0 Flank	2.23145e-06	ZNF429	152265091-152265091-chr7-Synonymous-SNP-T-T-A	0.000138538	KMT2C
817	WRN Non_Silent	0.000175373	WRN	BCL9L Non_Silent	0.000120154	BCL9L	CSF1 Intron	0.000265421	CSF1	SETD2 UTR	7.02755e-05	SETD2	KLK2 148.0 Flank	2.22589e-06	KLK2	195788622-195788622-chr3-Synonymous-SNP-G-G-A	0.000136953	MUC4
818	RAF1 Non_Silent	0.000175119	RAF1	152273750-152273750-chr7-Missense_Mutation-SNP-T-T-C	0.000120118	KMT2C	29944050-29944050-chr6-Intron-SNP-G-G-A	0.00026528	HLA-A	NBN UTR	7.02084e-05	NBN	CYP2C8 0.0 Flank	2.09547e-06	CYP2C8	TK1 Synonymous	0.000136558	TK1
819	RET Synonymous	0.000175019	RET	CAMTA1 19023.0 Non_Silent	0.000119452	CAMTA1	DCT Intron	0.00026491	DCT	AKT2 70.0 UTR	7.00901e-05	AKT2	190179583-190179583-chr4-3'Flank-SNP-G-G-T	2.08829e-06	DUX4	PLCG1 Synonymous	0.0001348	PLCG1
820	TSHR Non_Silent	0.000174836	TSHR	CDH1 Non_Silent	0.000118985	CDH1	TAT Intron	0.000264311	TAT	SEPT6 UTR	7.00603e-05	SEPT6	121546329-121546329-chr3-5'Flank-SNP-G-G-A	2.08567e-06	POLQ	SF1 Synonymous	0.000134442	SF1
821	RANBP2 593.0 Non_Silent	0.000174735	RANBP2	136496493-136496495-chr9-In_Frame_Del-DEL-GTG-GTG--	0.000118658	NOTCH1	RDM1 Intron	0.000263172	RDM1	TMPRSS2 31.0 UTR	6.96552e-05	TMPRSS2	49619438-49619438-chr12-5'Flank-SNP-T-T-G	2.07183e-06	PRPF40B	195782949-195782949-chr3-Synonymous-SNP-A-A-G	0.000133795	MUC4
822	100709477-100709477-chr8-Missense_Mutation-SNP-G-G-T	0.000174462	PABPC1	SS18L1 Non_Silent	0.000118589	SS18L1	207564326-207564329-chr1-Intron-DEL-ACAC-ACAC--	0.000262279	CR1	ERC1 732.0 UTR	6.89538e-05	ERC1	65504309-65504310-chr11-5'Flank-DEL-TT-TT--	2.0594e-06	MALAT1	BCL7A Synonymous	0.000133533	BCL7A
823	AFF3 Non_Silent	0.000174437	AFF3	FGFR2 Non_Silent	0.000118189	FGFR2	CACNA1D 3127.0 Intron	0.000262132	CACNA1D	80955616-80955616-chr14-5'UTR-SNP-G-G-T	6.89523e-05	TSHR	SSX1 244.0 Flank	2.05213e-06	SSX1	TRIM27 Synonymous	0.000133289	TRIM27
824	POLQ Intron	0.000174434	POLQ	WHSC1 Non_Silent	0.000116702	WHSC1	BMPR1A Intron	0.000262098	BMPR1A	13570350-13570350-chr3-5'UTR-SNP-T-T-C	6.87516e-05	FBLN2	102502871-102502871-chr10-5'Flank-SNP-G-G-A	1.9715e-06	SUFU	TET2 Synonymous	0.000132764	TET2
825	195788578-195788578-chr3-Missense_Mutation-SNP-A-A-T	0.000174354	MUC4	41977234-41977236-chr8-In_Frame_Del-DEL-TGA-TGA--	0.000116629	KAT6A	98956061-98956062-chr7-Intron-DEL-GT-GT--	0.000262089	TRRAP	MLF1 UTR	6.79831e-05	MLF1	AKAP9 Flank	1.95962e-06	AKAP9	50492710-50492710-chr15-Synonymous-SNP-T-T-C	0.00013229	USP8
826	119278646-119278648-chr11-In_Frame_Del-DEL-ATG-ATG--	0.000173973	CBL	ELN Non_Silent	0.000115738	ELN	EXT2 Intron	0.000261129	EXT2	RARA UTR	6.79551e-05	RARA	PCM1 2104.0 Flank	1.95094e-06	PCM1	ZNRF3 3337.0 Synonymous	0.000131553	ZNRF3
827	FANCD2 Non_Silent	0.000173856	FANCD2	118473470-118473471-chr11-Frame_Shift_Ins-INS-----C	0.000115558	KMT2A	128694107-128694108-chr9-Intron-DEL-TA-TA--	0.000260728	SET	TCEA1 1115.0 UTR	6.7577e-05	TCEA1	155064063-155064063-chrX-3'Flank-SNP-C-C-A	1.92892e-06	MTCP1	PTPN6 Synonymous	0.000131541	PTPN6
828	ATRX Non_Silent	0.000173684	ATRX	LRP1 1670.0 Non_Silent	0.000114815	LRP1	CHCHD7 Intron	0.000260149	CHCHD7	407656-407656-chr6-3'UTR-SNP-G-G-A	6.71674e-05	IRF4	35916928-35916928-chr17-3'Flank-SNP-A-A-G	1.9288e-06	RDM1	195786231-195786231-chr3-Synonymous-SNP-A-A-G	0.000131124	MUC4
829	RSPO2 Non_Silent	0.000173359	RSPO2	AFF1 2552.0 Non_Silent	0.000114693	AFF1	8876673-8876674-chr19-Intron-DEL-AG-AG--	0.00025882	MUC16	PICALM UTR	6.65616e-05	PICALM	AKAP9 0.0 Flank	1.88678e-06	AKAP9	MLH1 1106.0 Synonymous	0.000129034	MLH1
830	PABPC1 54.0 Non_Silent	0.000173053	PABPC1	RIN2 Non_Silent	0.00011382	RIN2	29296723-29296724-chr2-Intron-DEL-GT-GT--	0.000258577	ALK	127970054-127970054-chr6-3'UTR-SNP-C-C-T	6.65387e-05	PTPRK	FAM131B Flank	1.88184e-06	FAM131B	ZNF429 Synonymous	0.000128786	ZNF429
831	NFIB Non_Silent	0.000172816	NFIB	BCR 2688.0 Non_Silent	0.000113811	BCR	21029494-21029497-chr2-Intron-DEL-AGGA-AGGA--	0.000258333	APOB	ERCC4 UTR	6.62485e-05	ERCC4	CSF1 Flank	1.85215e-06	CSF1	PWWP2A Synonymous	0.000128321	PWWP2A
832	50186693-50186693-chr17-Missense_Mutation-SNP-T-T-G	0.00017253	COL1A1	100704967-100704967-chr8-Missense_Mutation-SNP-G-G-C	0.000113758	PABPC1	TP63 4977.0 Intron	0.000258227	TP63	MAX UTR	6.55384e-05	MAX	AFF3 11187.0 Flank	1.79384e-06	AFF3	OLIG2 Synonymous	0.000127863	OLIG2
833	CIITA Non_Silent	0.000172491	CIITA	ASXL2 447.0 Non_Silent	0.000113583	ASXL2	118900576-118900579-chr11-Intron-DEL-GCCT-GCCT--	0.000258015	BCL9L	HOXD13 UTR	6.48862e-05	HOXD13	MLF1 707.0 Flank	1.78185e-06	MLF1	GATA1 Synonymous	0.000127396	GATA1
834	GC Intron	0.000172308	GC	BCL9 1583.0 Non_Silent	0.000113489	BCL9	NFKB2 Intron	0.000257895	NFKB2	LASP1 7.0 UTR	6.47257e-05	LASP1	CNTRL 0.0 Flank	1.7603e-06	CNTRL	MDM2 Synonymous	0.000126031	MDM2
835	RB1 3119.0 Non_Silent	0.000172218	RB1	MYH1 77.0 Non_Silent	0.000113154	MYH1	BAP1 Intron	0.000255798	BAP1	27449421-27449422-chr16-3'UTR-DEL-TG-TG--	6.42443e-05	IL21R	MB 0.0 Flank	1.75819e-06	MB	MTCP1 Synonymous	0.000125916	MTCP1
836	PAX7 Synonymous	0.000171746	PAX7	VHL Non_Silent	0.000113046	VHL	43090922-43090923-chr17-Intron-DEL-CA-CA--	0.000255033	BRCA1	F12 UTR	6.41117e-05	F12	CD2 0.0 Flank	1.70952e-06	CD2	LMO1 Synonymous	0.000125886	LMO1
837	195781054-195781054-chr3-Missense_Mutation-SNP-C-C-T	0.000171687	MUC4	LRP1 1002.0 Non_Silent	0.00011281	LRP1	SPOP Intron	0.00025415	SPOP	CDH11 76.0 UTR	6.38294e-05	CDH11	CD2 Flank	1.68305e-06	CD2	150120109-150120109-chr5-Synonymous-SNP-T-T-C	0.00012575	PDGFRB
838	RUNX1 Intron	0.000171666	RUNX1	GPHN Non_Silent	0.000111757	GPHN	32648391-32648392-chr8-Intron-DEL-AG-AG--	0.000254094	NRG1	122380482-122380482-chr12-5'UTR-SNP-T-T-C	6.31944e-05	CLIP1	ALB 0.0 Flank	1.62254e-06	ALB	CDH1 Synonymous	0.000125499	CDH1
839	RANBP2 Synonymous	0.000171084	RANBP2	XPO1 287.0 Non_Silent	0.000111753	XPO1	NPM1 Intron	0.000254061	NPM1	AIP UTR	6.31116e-05	AIP	OLIG2 0.0 Flank	1.60844e-06	OLIG2	70156043-70156043-chr8-Synonymous-SNP-A-A-G	0.000124752	NCOA2
840	MED12 Intron	0.000171044	MED12	FLT4 Non_Silent	0.000111395	FLT4	DDX3X Intron	0.000253952	DDX3X	DDIT3 UTR	6.25633e-05	DDIT3	142582325-142582325-chr3-5'Flank-SNP-C-C-T	1.57603e-06	ATR	32340031-32340031-chr13-Synonymous-SNP-T-T-G	0.000124611	BRCA2
841	44782363-44782363-chr19-Splice_Region-SNP-A-A-C	0.00017043	CBLC	13778627-13778629-chr1-In_Frame_Del-DEL-GAA-GAA--	0.000110561	PRDM2	PTPRC 1667.0 Intron	0.000252814	PTPRC	29945606-29945606-chr6-3'UTR-SNP-C-C-T	6.21706e-05	HLA-A	215349769-215349769-chr2-3'Flank-SNP-T-T-G	1.55352e-06	ATIC	PABPC1 137.0 Synonymous	0.0001246	PABPC1
842	TCF12 Intron	0.000170404	TCF12	SEPT9 Non_Silent	0.00011047	SEPT9	SMAD4 Intron	0.000252097	SMAD4	171410730-171410730-chr5-3'UTR-DEL-T-T--	6.13279e-05	NPM1	IL21 0.0 Flank	1.53898e-06	IL21	158767438-158767438-chr6-Synonymous-SNP-T-T-G	0.000123888	EZR
843	HLA-A 58.0 Synonymous	0.000170193	HLA-A	XPC 270.0 Non_Silent	0.000110344	XPC	NSD1 2672.0 Intron	0.000251489	NSD1	MB21D2 UTR	6.12346e-05	MB21D2	154398367-154398367-chrX-5'Flank-SNP-G-G-T	1.53295e-06	RPL10	MUC16 1233.0 Synonymous	0.000123812	MUC16
844	10047675-10047675-chr3-Intron-SNP-G-G-A	0.000169678	FANCD2	FEN1 Non_Silent	0.000110302	FEN1	256259-256259-chr5-Intron-SNP-T-T-A	0.000250442	SDHA	KEAP1 UTR	6.07505e-05	KEAP1	15703926-15703926-chr16-3'Flank-DEL-T-T--	1.53104e-06	MYH11	WWP2 Synonymous	0.000122074	WWP2
845	HLA-A 35.0 Non_Silent	0.000169673	HLA-A	71140830-71140832-chrX-In_Frame_Del-DEL-GCA-GCA--	0.000110208	MED12	20236998-20236999-chr17-Intron-INS-----T	0.000250297	SPECC1	FAH UTR	6.05931e-05	FAH	32439130-32439130-chr11-5'Flank-SNP-C-C-T	1.52882e-06	WT1	152265049-152265049-chr7-Synonymous-SNP-G-G-A	0.000121494	KMT2C
846	SP1 588.0 Intron	0.000169637	SP1	GATA3 Non_Silent	0.000110183	GATA3	AIP Intron	0.000250039	AIP	IRS4 UTR	5.98931e-05	IRS4	157875489-157875492-chr2-5'Flank-DEL-ACAC-ACAC--	1.47971e-06	ACVR1	TAF15 294.0 Synonymous	0.000121143	TAF15
847	NR4A3 Non_Silent	0.000169236	NR4A3	ERCC5 Non_Silent	0.000110067	ERCC5	TEC 638.0 Intron	0.000249987	TEC	RAD51 722.0 UTR	5.97499e-05	RAD51	MB 333.0 Flank	1.46398e-06	MB	PAX8 Synonymous	0.00012013	PAX8
848	149542407-149542409-chr3-In_Frame_Del-DEL-CTG-CTG--	0.000169221	WWTR1	RMI2 108.0 Non_Silent	0.000109878	RMI2	2945728-2945733-chr7-Intron-DEL-ACACAC-ACACAC--	0.000249452	CARD11	STAG2 UTR	5.9199e-05	STAG2	F7 0.0 Flank	1.42849e-06	F7	MAP3K1 Synonymous	0.00011981	MAP3K1
849	NCOR1 Non_Silent	0.000168529	NCOR1	PDCD1LG2 778.0 Non_Silent	0.000109737	PDCD1LG2	PSD Intron	0.000249326	PSD	AKAP9 1.0 UTR	5.87061e-05	AKAP9	RUNX1 5232.0 Flank	1.396e-06	RUNX1	NUP214 1434.0 Synonymous	0.000118509	NUP214
850	57466291-57466292-chr12-Frame_Shift_Ins-INS-----G	0.000168381	GLI1	ARID1A 1693.0 Non_Silent	0.000109731	ARID1A	59666332-59666332-chr17-Intron-SNP-G-G-T	0.000249298	CLTC	CR1 2866.0 UTR	5.85128e-05	CR1	53415640-53415643-chr12-3'Flank-DEL-AAAA-AAAA--	1.3769e-06	SP1	KCNJ5 406.0 Synonymous	0.000118347	KCNJ5
851	RABEP1 Intron	0.000168285	RABEP1	RGPD3 366.0 Non_Silent	0.000108338	RGPD3	KMT2C 2021.0 Intron	0.000248782	KMT2C	F2 406.0 UTR	5.82267e-05	F2	10739048-10739048-chr22-5'Flank-SNP-A-A-G	1.34319e-06	U2	FCGR2B 201.0 Synonymous	0.000117853	FCGR2B
852	DNMT3A Non_Silent	0.000168228	DNMT3A	MLLT10 Non_Silent	0.000108235	MLLT10	KIAA1598 Intron	0.000248085	KIAA1598	ELF3 64.0 UTR	5.72693e-05	ELF3	196044758-196044758-chr3-3'Flank-SNP-A-A-G	1.32531e-06	TFRC	161673192-161673192-chr1-Synonymous-SNP-G-G-A	0.000117598	FCGR2B
853	SIRPA 410.0 Non_Silent	0.000168178	SIRPA	SF1 Non_Silent	0.000107743	SF1	IDH2 Intron	0.000247915	IDH2	SOCS1 UTR	5.71942e-05	SOCS1	NUP98 2457.0 Flank	1.32417e-06	NUP98	PMS1 Synonymous	0.000117504	PMS1
854	AK2 Flank	0.000167837	AK2	ZNF2 Non_Silent	0.000107512	ZNF2	PDE4DIP 2810.0 Intron	0.000247663	PDE4DIP	IKBKB UTR	5.65767e-05	IKBKB	32438949-32438949-chr11-5'Flank-SNP-C-C-A	1.24846e-06	WT1	153580166-153580166-chrX-Synonymous-SNP-G-G-C	0.000116302	ATP2B3
855	STAT6 88.0 Intron	0.000167756	STAT6	GC Non_Silent	0.000107509	GC	EGF 1909.0 Intron	0.00024735	EGF	CDC6 UTR	5.61042e-05	CDC6	NFATC2 3117.0 Flank	1.16697e-06	NFATC2	57470756-57470756-chr12-Synonymous-SNP-A-A-G	0.000115667	GLI1
856	RECQL4 Intron	0.000167665	RECQL4	MUC4 672.0 Non_Silent	0.00010742	MUC4	EIF3E Intron	0.000247307	EIF3E	BUB1 UTR	5.59931e-05	BUB1	MNX1 Flank	1.14736e-06	MNX1	ZNF3 Synonymous	0.000115512	ZNF3
857	NBEA Intron	0.000167378	NBEA	MTOR 296.0 Non_Silent	0.000107361	MTOR	31361099-31361099-chr10-Intron-SNP-C-C-A	0.000247275	ZEB1	142130786-142130788-chr2-5'UTR-DEL-CGG-CGG--	5.55145e-05	LRP1B	167976582-167976582-chr6-3'Flank-SNP-T-T-G	1.09765e-06	MLLT4	WNK2 2158.0 Synonymous	0.000115261	WNK2
858	SDHA 366.0 Synonymous	0.000166797	SDHA	MAP2 Non_Silent	0.000107205	MAP2	LRP1B 2786.0 Intron	0.000245936	LRP1B	MYCN 112.0 UTR	5.42676e-05	MYCN	20782844-20782844-chr7-3'Flank-DEL-A-A--	1.09729e-06	SP8	NTHL1 Synonymous	0.00011489	NTHL1
859	RBM10 Intron	0.00016658	RBM10	99601549-99601551-chr2-In_Frame_Del-DEL-GCT-GCT--	0.0001069	AFF3	31361107-31361107-chr10-Intron-SNP-T-T-C	0.000245828	ZEB1	T UTR	5.41857e-05	T	KRAS 0.0 Flank	1.09315e-06	KRAS	93292781-93292781-chr9-Synonymous-SNP-C-C-T	0.000114745	WNK2
860	66843909-66843909-chr11-Intron-SNP-T-T-G	0.000166155	RCE1	SKI Non_Silent	0.000106619	SKI	RARA Intron	0.000245694	RARA	SMO 473.0 UTR	5.37032e-05	SMO	ANK1 2890.0 Flank	1.08439e-06	ANK1	41468447-41468447-chr21-Synonymous-SNP-T-T-G	0.000114235	TMPRSS2
861	UTY Intron	0.000165765	UTY	MITF Non_Silent	0.000106213	MITF	EWSR1 10.0 Intron	0.000245287	EWSR1	CANT1 21.0 UTR	5.31476e-05	CANT1	33010835-33010836-chr1-3'Flank-INS-----TTGGAGAAG	1.075e-06	AK2	ITGAV Synonymous	0.000113817	ITGAV
862	8886831-8886831-chr19-Missense_Mutation-SNP-G-G-A	0.00016543	MUC16	LRIG3 49.0 Non_Silent	0.000105877	LRIG3	WWTR1 2731.0 Intron	0.000244754	WWTR1	WAS UTR	5.26734e-05	WAS	PTK6 0.0 Flank	1.04641e-06	PTK6	A1CF Synonymous	0.000113667	A1CF
863	LIFR Intron	0.000165329	LIFR	96254043-96254045-chr2-In_Frame_Del-DEL-TGC-TGC--	0.000105513	TMEM127	IKZF1 Intron	0.000244749	IKZF1	AK3 UTR	5.25136e-05	AK3	TG 0.0 Flank	1.0464e-06	TG	TH 62.0 Synonymous	0.000112504	TH
864	HLA-A 32.0 Synonymous	0.000165279	HLA-A	FAM135B 445.0 Non_Silent	0.000104939	FAM135B	MYB Intron	0.000244	MYB	29945706-29945706-chr6-3'UTR-SNP-T-T-C	5.24196e-05	HLA-A	PHOX2B 0.0 Flank	1.0292e-06	PHOX2B	44250040-44250040-chr6-Synonymous-SNP-T-T-G	0.00011146	HSP90AB1
865	KMT2C 2774.0 Intron	0.000164902	KMT2C	CDC6 Non_Silent	0.000104695	CDC6	BCL2L1 Intron	0.000243917	BCL2L1	HNRNPA2B1 216.0 UTR	5.1951e-05	HNRNPA2B1	34345829-34345829-chr15-5'Flank-SNP-C-C-T	1.02851e-06	NUTM1	IL21R Synonymous	0.000111361	IL21R
866	DDR2 2952.0 Intron	0.000164653	DDR2	37907548-37907548-chr7-Missense_Mutation-SNP-T-T-G	0.000104694	SFRP4	AKAP9 2725.0 Intron	0.000243804	AKAP9	TAL1 UTR	5.11176e-05	TAL1	BCL7A 782.0 Flank	1.02209e-06	BCL7A	8910429-8910429-chr19-Synonymous-SNP-A-A-T	0.000111307	MUC16
867	WWP2 0.0 Flank	0.000164467	WWP2	15876576-15876576-chr1-Missense_Mutation-SNP-G-G-A	0.000103806	SPEN	WWTR1 Intron	0.000242885	WWTR1	TPM4 UTR	4.99316e-05	TPM4	32003013-32003013-chr17-3'Flank-SNP-A-A-T	1.01833e-06	SUZ12	8964524-8964524-chr19-Synonymous-SNP-A-A-G	0.000110948	MUC16
868	ESR1 Synonymous	0.000164377	ESR1	TRIM2 Non_Silent	0.000103169	TRIM2	85990121-85990121-chr11-Intron-SNP-T-T-G	0.000242423	PICALM	MAP2 UTR	4.98208e-05	MAP2	167976288-167976288-chr6-3'Flank-SNP-T-T-G	1.01499e-06	MLLT4	CTCF Synonymous	0.00011033	CTCF
869	HOXA1 55.0 Synonymous	0.000164376	HOXA1	FBXO11 Non_Silent	0.000102943	FBXO11	VAV1 1407.0 Intron	0.00024229	VAV1	EIF1 2.0 UTR	4.96765e-05	EIF1	STAG2 Flank	1.00484e-06	STAG2	ALK 793.0 Synonymous	0.000109505	ALK
870	C3 609.0 Intron	0.000163888	C3	33013233-33013233-chr1-Missense_Mutation-SNP-A-A-G	0.000102713	AK2	NUP214 773.0 Intron	0.000241978	NUP214	CNTRL 1781.0 UTR	4.96505e-05	CNTRL	65498705-65498705-chr11-3'Flank-SNP-C-C-A	1.00148e-06	MALAT1	FBXO11 Synonymous	0.000109262	FBXO11
871	NUP98 Intron	0.000163579	NUP98	FNBP1 802.0 Non_Silent	0.000102442	FNBP1	PRPF40B 57.0 Intron	0.000240131	PRPF40B	WWP2 UTR	4.90659e-05	WWP2	65501225-65501225-chr11-3'Flank-DEL-T-T--	9.95867e-07	MALAT1	DCC 21410.0 Synonymous	0.000109085	DCC
872	TRIP11 Non_Silent	0.000163477	TRIP11	ARID1B 8588.0 Non_Silent	0.000102439	ARID1B	102572972-102572972-chr10-Intron-SNP-C-C-G	0.0002399	SUFU	TOP1 UTR	4.90112e-05	TOP1	50873233-50873233-chr19-5'Flank-SNP-G-G-A	9.72511e-07	KLK2	195788628-195788628-chr3-Synonymous-SNP-C-C-T	0.000107846	MUC4
873	EWSR1 10.0 Intron	0.000163263	EWSR1	27198268-27198268-chr7-Missense_Mutation-SNP-A-A-C	0.000102434	HOXA13	113152515-113152515-chr10-Intron-SNP-A-A-C	0.000239609	TCF7L2	HEY1 UTR	4.87407e-05	HEY1	122271795-122271795-chr12-3'Flank-SNP-G-G-A	9.69464e-07	CLIP1	FKBP9 Synonymous	0.000107557	FKBP9
874	APC Intron	0.000163249	APC	53495166-53495168-chr3-Missense_Mutation-DEL-GAT-GAT--	0.000101903	CACNA1D	SMARCD1 Intron	0.000239029	SMARCD1	95053571-95053571-chr2-3'UTR-SNP-A-A-C	4.79663e-05	MAL	65502033-65502034-chr11-3'Flank-INS-----C	9.60003e-07	MALAT1	PABPC1 198.0 Synonymous	0.000105826	PABPC1
875	RAD21 Non_Silent	0.000163185	RAD21	BCL11A 93.0 Non_Silent	0.000101709	BCL11A	175080528-175080528-chr1-Intron-SNP-G-G-A	0.000238007	TNN	TRAF7 UTR	4.77061e-05	TRAF7	113279023-113279023-chr2-5'Flank-SNP-T-T-G	9.50729e-07	PAX8	SP6 Synonymous	0.00010579	SP6
876	101360035-101360035-chrX-Intron-SNP-T-T-G	0.000162814	BTK	SRGAP3 101.0 Non_Silent	0.000101437	SRGAP3	SBDS Intron	0.000237198	SBDS	CYLD 1091.0 UTR	4.74679e-05	CYLD	190179613-190179613-chr4-3'Flank-SNP-C-C-A	9.33147e-07	DUX4	169116561-169116561-chr3-Synonymous-SNP-T-T-C	0.000105364	MECOM
877	NT5C2 34.0 Non_Silent	0.000162612	NT5C2	89333597-89333599-chr15-In_Frame_Del-DEL-TGC-TGC--	0.000101328	POLG	5130477-5130477-chr17-Intron-SNP-C-C-T	0.000237153	USP6	389117-389117-chr12-5'UTR-SNP-T-T-C	4.68119e-05	KDM5A	138759375-138759375-chr3-5'Flank-SNP-T-T-A	9.1261e-07	PIK3CB	GMPS Synonymous	0.000105311	GMPS
878	TSC1 Synonymous	0.000162323	TSC1	8985600-8985602-chr3-In_Frame_Del-DEL-GCT-GCT--	9.99247e-05	SRGAP3	SRGAP3 1448.0 Intron	0.000236596	SRGAP3	SALL4 368.0 UTR	4.66433e-05	SALL4	CYP2C8 656.0 Flank	8.92563e-07	CYP2C8	FAM46C Synonymous	0.000105202	FAM46C
879	158787210-158787211-chr6-Splice_Region-DEL-GA-GA--	0.000161899	EZR	CA1 203.0 Non_Silent	9.98566e-05	CA1	SMARCB1 Intron	0.000236198	SMARCB1	29945578-29945578-chr6-3'UTR-SNP-A-A-G	4.60289e-05	HLA-A	ALK 14577.0 Flank	8.92094e-07	ALK	ZEB1 Synonymous	0.000104896	ZEB1
880	114398011-114398013-chr1-Intron-DEL-AAA-AAA--	0.000161837	TRIM33	29944151-29944151-chr6-Missense_Mutation-SNP-C-C-G	9.98462e-05	HLA-A	AMT Intron	0.000235597	AMT	77498664-77498664-chr17-3'UTR-SNP-A-A-G	4.58995e-05	SEPT9	KAT6B 0.0 Flank	8.83568e-07	KAT6B	70157189-70157189-chr8-Synonymous-SNP-C-C-T	0.000103553	NCOA2
881	29942850-29942850-chr6-Missense_Mutation-SNP-A-A-T	0.00016154	HLA-A	18263865-18263865-chr6-Missense_Mutation-SNP-C-C-G	9.9594e-05	DEK	GAS7 525.0 Intron	0.000234924	GAS7	KDM6A UTR	4.58955e-05	KDM6A	149515881-149515882-chr3-3'Flank-INS-----TTGTTG	8.63675e-07	WWTR1	110340761-110340761-chr1-Synonymous-SNP-A-A-C	0.000103441	RBM15
882	POT1 Intron	0.000161277	POT1	STAT6 Non_Silent	9.93167e-05	STAT6	MLLT6 Intron	0.000234663	MLLT6	LEF1 UTR	4.5737e-05	LEF1	CUL3 0.0 Flank	8.61672e-07	CUL3	3729776-3729776-chr16-Synonymous-SNP-G-G-C	0.000100886	CREBBP
883	15931506-15931506-chr1-Missense_Mutation-SNP-A-A-C	0.00016093	SPEN	RNF213 556.0 Non_Silent	9.90417e-05	RNF213	10073532-10073532-chr3-Intron-SNP-C-C-T	0.000234155	FANCD2	PRPF4 UTR	4.56632e-05	PRPF4	FGFR2 Flank	8.55049e-07	FGFR2	KMT2C 1013.0 Synonymous	0.000100258	KMT2C
884	CDH17 Intron	0.000160902	CDH17	DRG1 Non_Silent	9.87822e-05	DRG1	FLT4 385.0 Intron	0.000233607	FLT4	CCDC6 UTR	4.52599e-05	CCDC6	MITF Flank	8.54212e-07	MITF	CDK6 Synonymous	0.000100043	CDK6
885	A1CF 881.0 Intron	0.000160843	A1CF	100717782-100717782-chr8-Missense_Mutation-SNP-T-T-C	9.86289e-05	PABPC1	PAFAH1B2 313.0 Intron	0.000232925	PAFAH1B2	MAP3K1 UTR	4.455e-05	MAP3K1	32440395-32440395-chr11-5'Flank-DEL-T-T--	8.47733e-07	WT1	58363586-58363586-chr17-Synonymous-SNP-A-A-C	9.96415e-05	RNF43
886	MUC16 944.0 Synonymous	0.000160608	MUC16	TNN 1582.0 Non_Silent	9.80208e-05	TNN	BCL7A Intron	0.000232223	BCL7A	NUMA1 13.0 UTR	4.42595e-05	NUMA1	65500825-65500826-chr11-3'Flank-INS-----GC	8.42795e-07	MALAT1	MAP2K2 215.0 Synonymous	9.92217e-05	MAP2K2
887	1260401-1260402-chr5-Intron-DEL-CA-CA--	0.000160036	TERT	STAT3 Non_Silent	9.78214e-05	STAT3	AFF1 Intron	0.000231806	AFF1	MAX 17.0 UTR	4.39244e-05	MAX	90647596-90647596-chr15-3'Flank-SNP-C-C-T	7.9942e-07	CRTC3	152098960-152098960-chr6-Synonymous-SNP-G-G-A	9.91673e-05	ESR1
888	HIP1 Intron	0.000159848	HIP1	KDR Non_Silent	9.77463e-05	KDR	PER1 Intron	0.000231584	PER1	ECT2 UTR	4.383e-05	ECT2	PPP2R1A 791.0 Flank	7.97948e-07	PPP2R1A	PDGFRB Synonymous	9.9003e-05	PDGFRB
889	DRG1 Non_Silent	0.000159728	DRG1	TAF15 Non_Silent	9.73392e-05	TAF15	CBLC 90.0 Intron	0.000231391	CBLC	KAT6B UTR	4.38271e-05	KAT6B	125194791-125194791-chr9-5'Flank-SNP-A-A-G	7.93393e-07	PPP6C	149030263-149030263-chr1-Synonymous-SNP-A-A-G	9.87634e-05	PDE4DIP
890	RGPD3 Intron	0.00015895	RGPD3	13778642-13778644-chr1-In_Frame_Del-DEL-GAT-GAT--	9.69605e-05	PRDM2	CA1 Intron	0.000231231	CA1	KMT2D UTR	4.35365e-05	KMT2D	16067440-16067440-chr19-5'Flank-SNP-G-G-A	7.92747e-07	TPM4	FGFR3 Synonymous	9.8543e-05	FGFR3
891	LRP1B Synonymous	0.00015889	LRP1B	40052275-40052275-chrX-Missense_Mutation-SNP-A-A-C	9.68465e-05	BCOR	157587250-157587250-chr1-Intron-SNP-A-A-G	0.000231118	FCRL4	6606427-6606427-chr12-5'UTR-SNP-A-A-G	4.29294e-05	CHD4	MUC16 0.0 Flank	7.88224e-07	MUC16	CAMTA1 17572.0 Synonymous	9.82779e-05	CAMTA1
892	WNK2 Non_Silent	0.000158828	WNK2	AKAP9 2025.0 Non_Silent	9.60394e-05	AKAP9	TNFAIP3 84.0 Intron	0.000231048	TNFAIP3	150113287-150113292-chr5-5'UTR-DEL-CTCTTC-CTCTTC--	4.2594e-05	CSF1R	KTN1 Flank	7.85072e-07	KTN1	HIP1 Synonymous	9.81408e-05	HIP1
893	29944067-29944067-chr6-Intron-SNP-T-T-A	0.000158392	HLA-A	AMER1 Non_Silent	9.59964e-05	AMER1	AK1 Intron	0.000230893	AK1	EBF1 8073.0 UTR	4.23531e-05	EBF1	TCL1A 0.0 Flank	7.66497e-07	TCL1A	POLD1 444.0 Synonymous	9.78847e-05	POLD1
894	MKL1 213.0 Non_Silent	0.000158389	MKL1	CRNKL1 Non_Silent	9.56617e-05	CRNKL1	PTPN1 Intron	0.00023088	PTPN1	UBP1 UTR	4.23521e-05	UBP1	32439085-32439085-chr11-5'Flank-SNP-A-A-C	7.59796e-07	WT1	TNK1 Synonymous	9.74767e-05	TNK1
895	PTPRC 1667.0 Intron	0.000158248	PTPRC	CNOT3 Non_Silent	9.55168e-05	CNOT3	RAD51 Intron	0.000230334	RAD51	POU2AF1 540.0 UTR	4.22977e-05	POU2AF1	10740267-10740267-chr22-5'Flank-DEL-C-C--	7.54181e-07	U2	CCNB1IP1 Synonymous	9.6942e-05	CCNB1IP1
896	NUMA1 127.0 Intron	0.000158113	NUMA1	CBFA2T3 Non_Silent	9.50234e-05	CBFA2T3	KDSR Intron	0.000230204	KDSR	75538074-75538074-chr7-3'UTR-SNP-C-C-G	4.22267e-05	HIP1	32438818-32438818-chr11-5'Flank-SNP-G-G-T	7.42827e-07	WT1	SP1 Synonymous	9.68877e-05	SP1
897	HR Intron	0.000157418	HR	75022148-75022153-chr10-In_Frame_Del-DEL-GAAGAA-GAAGAA--	9.46906e-05	KAT6B	KIAA1549 Intron	0.000229962	KIAA1549	KDM5A 2180.0 UTR	4.22083e-05	KDM5A	ETV1 0.0 Flank	7.36272e-07	ETV1	LARP4B Synonymous	9.55021e-05	LARP4B
898	FOXO1 Intron	0.000157116	FOXO1	CDKN1B Non_Silent	9.44685e-05	CDKN1B	6955276-6955276-chr12-Intron-SNP-T-T-G	0.000229761	PTPN6	78031296-78031296-chr9-5'UTR-SNP-A-A-G	4.20088e-05	GNAQ	18631507-18631507-chr1-5'Flank-SNP-C-C-T	7.29581e-07	PAX7	MLH1 Synonymous	9.50582e-05	MLH1
899	F5 Intron	0.000156933	F5	KL Non_Silent	9.4337e-05	KL	NFIB Intron	0.000229555	NFIB	MUC4 UTR	4.18687e-05	MUC4	120070591-120070591-chr1-5'Flank-SNP-A-A-G	7.24814e-07	NOTCH2	147618947-147618947-chr1-Synonymous-SNP-A-A-C	9.45922e-05	BCL9
900	PPFIBP1 2944.0 Intron	0.000156568	PPFIBP1	PABPC1 134.0 Non_Silent	9.42997e-05	PABPC1	RECQL Intron	0.000228842	RECQL	TNK1 UTR	4.17644e-05	TNK1	ALK 0.0 Flank	7.07377e-07	ALK	ABL2 187.0 Synonymous	9.43645e-05	ABL2
901	CDH1 Non_Silent	0.000156112	CDH1	PPARG Non_Silent	9.38461e-05	PPARG	68306752-68306752-chr14-Intron-SNP-A-A-G	0.000228698	RAD51B	KIAA1549 UTR	4.12897e-05	KIAA1549	44873370-44873372-chrX-5'Flank-DEL-GCC-GCC--	7.07008e-07	KDM6A	TRIM3 Synonymous	9.40268e-05	TRIM3
902	KDM6A 4064.0 Intron	0.000155911	KDM6A	ERC1 Non_Silent	9.34203e-05	ERC1	HNF1A Intron	0.000228151	HNF1A	CD274 349.0 UTR	4.12513e-05	CD274	9762394-9762394-chr16-3'Flank-SNP-G-G-A	6.91404e-07	GRIN2A	52211400-52211400-chr19-Synonymous-SNP-C-C-G	9.39822e-05	PPP2R1A
903	PDGFRA Intron	0.000155907	PDGFRA	CNTNAP2 42268.0 Non_Silent	9.33366e-05	CNTNAP2	PDCD1 Intron	0.000228121	PDCD1	PABPC1 5.0 UTR	4.12278e-05	PABPC1	CR1 2891.0 Flank	6.89538e-07	CR1	FANCF Synonymous	9.3854e-05	FANCF
904	PTK6 Non_Silent	0.000155565	PTK6	DCTN1 Non_Silent	9.32134e-05	DCTN1	NCOA2 2138.0 Intron	0.000227704	NCOA2	FANCG UTR	4.11162e-05	FANCG	32438681-32438681-chr11-5'Flank-SNP-C-C-T	6.84919e-07	WT1	CALR Synonymous	9.29699e-05	CALR
905	CLTC Intron	0.000155383	CLTC	HRAS 39.0 Non_Silent	9.31691e-05	HRAS	CTCF Intron	0.000227142	CTCF	RPL10 51.0 UTR	4.08464e-05	RPL10	32383249-32383249-chr11-3'Flank-SNP-G-G-C	6.80245e-07	WT1	GNAS Synonymous	9.28731e-05	GNAS
906	BRIP1 Non_Silent	0.000155339	BRIP1	14158612-14158612-chr3-Missense_Mutation-SNP-A-A-C	9.30751e-05	XPC	LRP1B 4261.0 Intron	0.000227069	LRP1B	SP1 2.0 UTR	4.08003e-05	SP1	S100A7 44.0 Flank	6.76756e-07	S100A7	CBLB Synonymous	9.28598e-05	CBLB
907	TAL1 160.0 Intron	0.000155251	TAL1	POLE 396.0 Non_Silent	9.30215e-05	POLE	10048168-10048168-chr3-Intron-SNP-A-A-G	0.000226875	FANCD2	ETV1 UTR	4.05322e-05	ETV1	224585652-224585652-chr2-5'Flank-SNP-G-G-T	6.63715e-07	CUL3	ATIC Synonymous	9.22369e-05	ATIC
908	SRSF3 Intron	0.000155055	SRSF3	MLLT6 Non_Silent	9.29303e-05	MLLT6	193142099-193142102-chr1-Intron-DEL-GAGA-GAGA--	0.000226834	CDC73	BCR 2707.0 UTR	4.04767e-05	BCR	112818760-112818760-chr10-3'Flank-DEL-T-T--	6.62127e-07	VTI1A	EXT1 Synonymous	9.19295e-05	EXT1
909	KAT6A 224.0 Intron	0.000154557	KAT6A	CREBBP 65.0 Non_Silent	9.28082e-05	CREBBP	NAB2 Intron	0.000226589	NAB2	TNFRSF17 2.0 UTR	4.03298e-05	TNFRSF17	190179565-190179565-chr4-3'Flank-SNP-G-G-C	6.57496e-07	DUX4	116757685-116757685-chr7-Synonymous-SNP-T-T-G	9.17042e-05	MET
910	GNA11 Intron	0.000154525	GNA11	BCORL1 608.0 Non_Silent	9.25862e-05	BCORL1	ERG Intron	0.000225027	ERG	YWHAE UTR	3.94774e-05	YWHAE	33010566-33010567-chr1-3'Flank-INS-----TCTG	6.56795e-07	AK2	IRS4 16.0 Synonymous	9.16284e-05	IRS4
911	RUNX1 Non_Silent	0.000154389	RUNX1	MTA1 Non_Silent	9.17744e-05	MTA1	WHSC1 Intron	0.000224959	WHSC1	PPFIBP1 3376.0 UTR	3.93057e-05	PPFIBP1	97699143-97699143-chr9-5'Flank-SNP-A-A-G	6.49223e-07	XPA	IKZF1 Synonymous	9.0716e-05	IKZF1
912	KMT2C 2603.0 Non_Silent	0.000154318	KMT2C	EPHA3 Non_Silent	9.15614e-05	EPHA3	MKL1 Intron	0.000224775	MKL1	32398875-32398875-chr13-3'UTR-SNP-A-A-C	3.93032e-05	BRCA2	53380177-53380177-chr12-5'Flank-DEL-C-C--	6.48503e-07	SP1	ZRSR2 Synonymous	9.05556e-05	ZRSR2
913	40420883-40420885-chr22-In_Frame_Del-DEL-TGC-TGC--	0.000153927	MKL1	F7 Non_Silent	9.14694e-05	F7	PTPN6 81.0 Intron	0.000224668	PTPN6	133129383-133129383-chr9-5'UTR-SNP-C-C-T	3.88179e-05	RALGDS	10833274-10833274-chr19-3'Flank-DEL-A-A--	6.38447e-07	DNM2	KNSTRN Synonymous	9.0403e-05	KNSTRN
914	BCR 2688.0 Synonymous	0.000153839	BCR	CYLD 1046.0 Non_Silent	9.119e-05	CYLD	ACVR2A Intron	0.000223988	ACVR2A	SLC34A2 419.0 UTR	3.85818e-05	SLC34A2	92351976-92351976-chr11-5'Flank-SNP-T-T-C	6.34929e-07	FAT3	CCDC6 2351.0 Synonymous	9.01076e-05	CCDC6
915	WNK2 2668.0 Flank	0.000153828	WNK2	ATP2B3 Non_Silent	9.11861e-05	ATP2B3	31191353-31191353-chr16-Intron-SNP-T-T-G	0.000223754	FUS	PBX1 5743.0 UTR	3.84368e-05	PBX1	60452727-60452727-chr2-3'Flank-SNP-A-A-G	6.20079e-07	BCL11A	CD7 Synonymous	9.01066e-05	CD7
916	MKL1 Non_Silent	0.000153779	MKL1	LRP1 752.0 Non_Silent	9.11162e-05	LRP1	ZNF19 Intron	0.000223317	ZNF19	SI UTR	3.84219e-05	SI	44253935-44253935-chr6-3'Flank-SNP-C-C-A	5.94286e-07	HSP90AB1	ALK 341.0 Synonymous	8.98136e-05	ALK
917	XPO1 Non_Silent	0.000153763	XPO1	127738434-127738434-chr8-Missense_Mutation-SNP-A-A-C	9.02976e-05	MYC	GOLGA5 Intron	0.00022253	GOLGA5	OXR1 UTR	3.83728e-05	OXR1	FAM47C 0.0 Flank	5.92162e-07	FAM47C	RNF43 112.0 Synonymous	8.96842e-05	RNF43
918	NF2 Intron	0.000153549	NF2	MPL Non_Silent	8.98846e-05	MPL	PTEN Intron	0.000221788	PTEN	BARD1 1680.0 UTR	3.82804e-05	BARD1	NFATC2 3486.0 Flank	5.71477e-07	NFATC2	EZR 34.0 Synonymous	8.95856e-05	EZR
919	EPHA3 Intron	0.000153453	EPHA3	LCP1 Non_Silent	8.98066e-05	LCP1	PRKCB 8.0 Intron	0.000221554	PRKCB	389102-389106-chr12-5'UTR-DEL-GGGGG-GGGGG--	3.82352e-05	KDM5A	41134515-41134515-chr20-5'Flank-SNP-G-G-C	5.70488e-07	PLCG1	CBL Synonymous	8.90649e-05	CBL
920	SOX2 Non_Silent	0.000153067	SOX2	NUP214 43.0 Non_Silent	8.9353e-05	NUP214	MLH1 Intron	0.000221552	MLH1	PRDM2 2370.0 UTR	3.78031e-05	PRDM2	SDC4 0.0 Flank	5.6382e-07	SDC4	49932145-49932145-chr10-Synonymous-SNP-C-C-G	8.82412e-05	PARG
921	NCOR2 65.0 Intron	0.000153006	NCOR2	CD274 Non_Silent	8.92947e-05	CD274	SSX1 168.0 Intron	0.000220588	SSX1	40161106-40161106-chr15-5'UTR-SNP-A-A-G	3.77344e-05	BUB1B	BCL3 231.0 Flank	5.37106e-07	BCL3	COL2A1 177.0 Synonymous	8.79596e-05	COL2A1
922	HLA-A 56.0 Intron	0.000153003	HLA-A	CD7 Non_Silent	8.91154e-05	CD7	PIK3CB 1699.0 Intron	0.000219409	PIK3CB	SH3GL1 UTR	3.67518e-05	SH3GL1	HOXA13 116.0 Flank	5.15481e-07	HOXA13	PRRX1 Synonymous	8.78602e-05	PRRX1
923	AK2 6.0 Synonymous	0.000152939	AK2	PABPC1 304.0 Non_Silent	8.89168e-05	PABPC1	IRF4 Intron	0.000219378	IRF4	ERCC2 29.0 UTR	3.65513e-05	ERCC2	69757891-69757891-chr16-5'Flank-SNP-G-G-T	4.95654e-07	WWP2	TF 191.0 Synonymous	8.76594e-05	TF
924	KMT2C 2077.0 Non_Silent	0.000152926	KMT2C	DNM2 2140.0 Non_Silent	8.86756e-05	DNM2	79909568-79909569-chr2-Intron-DEL-TG-TG--	0.000219237	CTNNA2	DCC UTR	3.56509e-05	DCC	STAG2 2785.0 Flank	4.93382e-07	STAG2	TNFAIP3 Synonymous	8.75954e-05	TNFAIP3
925	HSP90AB1 UTR	0.000152746	HSP90AB1	3770628-3770628-chr16-Missense_Mutation-SNP-G-G-T	8.82786e-05	CREBBP	MAP2 2339.0 Intron	0.000218543	MAP2	XPC 672.0 UTR	3.54942e-05	XPC	6664592-6664592-chr12-3'Flank-SNP-T-T-C	4.8646e-07	ZNF384	KEAP1 Synonymous	8.73763e-05	KEAP1
926	TFRC 0.0 Flank	0.000152643	TFRC	FHIT Non_Silent	8.79507e-05	FHIT	ETNK1 Intron	0.000218451	ETNK1	2088612-2088612-chr16-3'UTR-SNP-G-G-T	3.53499e-05	TSC2	CDH11 3570.0 Flank	4.83836e-07	CDH11	100704988-100704988-chr8-Synonymous-SNP-A-A-G	8.72179e-05	PABPC1
927	CDX2 Synonymous	0.000152108	CDX2	57466291-57466292-chr12-Frame_Shift_Ins-INS-----G	8.76622e-05	GLI1	ACSL6 698.0 Intron	0.000217842	ACSL6	133536008-133536008-chrX-3'UTR-SNP-A-A-G	3.52499e-05	GPC3	190179571-190179571-chr4-3'Flank-SNP-T-T-A	4.81057e-07	DUX4	RAF1 Synonymous	8.71793e-05	RAF1
928	PABPC1 131.0 Non_Silent	0.000152096	PABPC1	NIN Non_Silent	8.76171e-05	NIN	PICALM Intron	0.000217325	PICALM	TBL1XR1 UTR	3.50731e-05	TBL1XR1	7750846-7750846-chr19-5'Flank-SNP-A-A-G	4.63785e-07	CD209	BCL11A Synonymous	8.71272e-05	BCL11A
929	PABPC1 Intron	0.000152003	PABPC1	C2orf44 Non_Silent	8.7328e-05	C2orf44	57258367-57258369-chr17-Intron-DEL-TTG-TTG--	0.000216906	MSI2	RGS7 UTR	3.46367e-05	RGS7	29949545-29949546-chr6-3'Flank-INS-----ATTT	4.6369e-07	HLA-A	PALB2 Synonymous	8.66788e-05	PALB2
930	PRKACA Intron	0.00015153	PRKACA	DDX10 1162.0 Non_Silent	8.64965e-05	DDX10	SLC45A3 Intron	0.000215637	SLC45A3	SMO UTR	3.41038e-05	SMO	176099662-176099662-chr2-3'Flank-SNP-C-C-A	4.62919e-07	HOXD13	JUN Synonymous	8.64303e-05	JUN
931	FANCD2 0.0 Flank	0.000151373	FANCD2	ZBTB16 Non_Silent	8.6386e-05	ZBTB16	195811631-195811632-chr3-Intron-DEL-TC-TC--	0.000215436	MUC4	69651347-69651347-chr11-3'UTR-SNP-C-C-A	3.40382e-05	CCND1	BCL7A Flank	4.57358e-07	BCL7A	10049400-10049400-chr3-Synonymous-SNP-T-T-C	8.63454e-05	FANCD2
932	TRIP11 Intron	0.000150975	TRIP11	100704954-100704954-chr8-Missense_Mutation-SNP-A-A-G	8.6358e-05	PABPC1	FLI1 Intron	0.000215062	FLI1	CSMD3 34.0 UTR	3.39119e-05	CSMD3	71106644-71106644-chrX-3'Flank-SNP-G-G-T	4.56612e-07	FOXO4	94176641-94176641-chr8-Synonymous-SNP-A-A-C	8.62139e-05	CDH17
933	8910514-8910514-chr19-Splice_Region-SNP-A-A-T	0.000150693	MUC16	MUC16 1104.0 Non_Silent	8.62108e-05	MUC16	89327120-89327120-chr15-Intron-SNP-A-A-C	0.000214965	POLG	41688986-41688986-chr17-5'UTR-SNP-G-G-A	3.38946e-05	EIF1	ELL 1591.0 Flank	4.50569e-07	ELL	EP300 1734.0 Synonymous	8.61001e-05	EP300
934	ERCC3 Non_Silent	0.000150606	ERCC3	AKT2 Non_Silent	8.59812e-05	AKT2	ELF4 86.0 Intron	0.00021422	ELF4	RAC1 4.0 UTR	3.38922e-05	RAC1	190179586-190179586-chr4-3'Flank-SNP-T-T-C	4.45559e-07	DUX4	158767450-158767450-chr6-Synonymous-SNP-T-T-G	8.60154e-05	EZR
935	PSIP1 Non_Silent	0.00015057	PSIP1	HNF1A Non_Silent	8.58327e-05	HNF1A	MAP2K2 Intron	0.000214134	MAP2K2	TLX1 131.0 UTR	3.37399e-05	TLX1	ALB Flank	4.4406e-07	ALB	CARS Synonymous	8.59906e-05	CARS
936	SDC4 Intron	0.000150563	SDC4	IKZF1 Non_Silent	8.55577e-05	IKZF1	95711812-95711813-chr14-Intron-DEL-AG-AG--	0.00021391	TCL1A	KMT2A UTR	3.35543e-05	KMT2A	USP6 0.0 Flank	4.41734e-07	USP6	152185572-152185572-chr7-Synonymous-SNP-T-T-G	8.59857e-05	KMT2C
937	MYH11 Non_Silent	0.000150382	MYH11	ERCC4 Non_Silent	8.55512e-05	ERCC4	66843909-66843909-chr11-Intron-SNP-T-T-G	0.000211577	RCE1	TBL1X 5026.0 UTR	3.34599e-05	TBL1X	10740709-10740709-chr22-5'Flank-SNP-T-T-C	4.40054e-07	U2	GPHN Synonymous	8.5839e-05	GPHN
938	FGFR1 Non_Silent	0.000150114	FGFR1	FOXP1 4871.0 Non_Silent	8.52073e-05	FOXP1	BUB1B Intron	0.000211068	BUB1B	BRCA2 1669.0 UTR	3.34297e-05	BRCA2	99865302-99865303-chr9-3'Flank-DEL-AT-AT--	4.37795e-07	NR4A3	TBP 152.0 Synonymous	8.55936e-05	TBP
939	CCND3 Intron	0.000149738	CCND3	AMT Non_Silent	8.47555e-05	AMT	6955269-6955269-chr12-Splice_Site-SNP-T-T-G	0.000210157	PTPN6	29945718-29945718-chr6-3'UTR-SNP-G-G-A	3.31676e-05	HLA-A	STIL 1282.0 Flank	4.34577e-07	STIL	TAL1 73.0 Synonymous	8.52491e-05	TAL1
940	POT1 Non_Silent	0.000149644	POT1	127289368-127289370-chr2-In_Frame_Del-DEL-TCT-TCT--	8.47318e-05	ERCC3	REL Intron	0.000210099	REL	TET1 2625.0 UTR	3.24384e-05	TET1	57661622-57661622-chr11-3'Flank-SNP-A-A-T	4.03953e-07	CLP1	TRIM3 190.0 Synonymous	8.51935e-05	TRIM3
941	CBL Non_Silent	0.000149408	CBL	TP53 46.0 Non_Silent	8.45248e-05	TP53	ABL1 Intron	0.000209302	ABL1	SMO 474.0 UTR	3.24351e-05	SMO	10732556-10732556-chr22-3'Flank-SNP-G-G-T	3.98275e-07	U2	ERCC4 Synonymous	8.51882e-05	ERCC4
942	ATRX 2949.0 Non_Silent	0.000149406	ATRX	UBR5 483.0 Non_Silent	8.44943e-05	UBR5	FUBP1 167.0 Intron	0.000208965	FUBP1	89738447-89738447-chr16-3'UTR-SNP-C-C-T	3.21929e-05	FANCA	KAT6B 4121.0 Flank	3.97644e-07	KAT6B	108765714-108765714-chr2-Synonymous-SNP-A-A-G	8.47988e-05	RANBP2
943	72957814-72957816-chr16-In_Frame_Del-DEL-CCA-CCA--	0.00014899	ZFHX3	ACSL6 Non_Silent	8.44545e-05	ACSL6	ELF3 124.0 Intron	0.000208158	ELF3	114397587-114397587-chr1-3'UTR-SNP-G-G-T	3.2063e-05	TRIM33	6675323-6675323-chr19-3'Flank-SNP-G-G-A	3.88985e-07	C3	CSF1R 86.0 Synonymous	8.3848e-05	CSF1R
944	ECT2L Intron	0.000148941	ECT2L	BAP1 Non_Silent	8.36827e-05	BAP1	ERBB4 4968.0 Intron	0.000208073	ERBB4	KIT 1615.0 UTR	3.20549e-05	KIT	36674351-36674351-chr6-5'Flank-SNP-C-C-A	3.86936e-07	CDKN1A	NBN Synonymous	8.34847e-05	NBN
945	FCGR2B Non_Silent	0.000148907	FCGR2B	ID3 Non_Silent	8.30039e-05	ID3	TGFBR2 Intron	0.000206651	TGFBR2	PRF1 13.0 UTR	3.19859e-05	PRF1	65503850-65503875-chr11-5'Flank-DEL-CCAGGCACATGGCAATAGAGGCCCTC-CCAGGCACATGGCAATAGAGGCCCTC--	3.86771e-07	MALAT1	LRP1B 2085.0 Synonymous	8.34255e-05	LRP1B
946	32974751-32974751-chr7-Missense_Mutation-SNP-A-A-G	0.000148819	FKBP9	8910499-8910499-chr19-Missense_Mutation-SNP-G-G-C	8.29968e-05	MUC16	105734007-105734007-chr3-Splice_Site-SNP-A-A-C	0.00020662	CBLB	159099527-159099528-chr5-5'UTR-DEL-AA-AA--	3.19311e-05	EBF1	118527315-118527315-chr11-3'Flank-SNP-G-G-T	3.84209e-07	KMT2A	64503860-64503860-chr17-Synonymous-SNP-A-A-G	8.3291e-05	DDX5
947	29197730-29197731-chr2-Intron-DEL-CA-CA--	0.00014868	ALK	FLI1 Non_Silent	8.26947e-05	FLI1	31349087-31349090-chr17-Intron-DEL-TTGT-TTGT--	0.000206129	NF1	7766593-7766594-chr1-3'UTR-INS-----CA	3.11606e-05	CAMTA1	32003090-32003090-chr17-3'Flank-SNP-A-A-C	3.8165e-07	SUZ12	EXT2 Synonymous	8.21467e-05	EXT2
948	8960747-8960747-chr19-Synonymous-SNP-T-T-G	0.00014862	MUC16	TERT Non_Silent	8.24447e-05	TERT	RIN2 Intron	0.00020609	RIN2	HOXC11 1.0 UTR	3.11278e-05	HOXC11	LSM14A 0.0 Flank	3.78412e-07	LSM14A	USP6 274.0 Synonymous	8.15047e-05	USP6
949	RANBP2 Non_Silent	0.000147372	RANBP2	PDCD1LG2 Non_Silent	8.15843e-05	PDCD1LG2	TCEA1 Intron	0.000205994	TCEA1	117627845-117627846-chr1-3'UTR-DEL-TG-TG--	3.10652e-05	FAM46C	NFE2L2 0.0 Flank	3.67696e-07	NFE2L2	FES Synonymous	8.14874e-05	FES
950	MSH6 409.0 Non_Silent	0.000147301	MSH6	152235860-152235860-chr7-Missense_Mutation-SNP-C-C-T	8.1112e-05	KMT2C	49419883-49419885-chr3-Intron-DEL-GAG-GAG--	0.000205819	AMT	PREX2 UTR	3.10412e-05	PREX2	10732862-10732862-chr22-3'Flank-SNP-C-C-A	3.66594e-07	U2	RAD21 Synonymous	8.14864e-05	RAD21
951	CIC 141.0 Non_Silent	0.000146932	CIC	58782987-58782987-chr1-Nonsense_Mutation-SNP-G-G-T	8.10066e-05	JUN	EXT1 Intron	0.000205083	EXT1	FGFR1 UTR	3.09599e-05	FGFR1	MLLT4 2858.0 Flank	3.56241e-07	MLLT4	47981785-47981785-chr12-Synonymous-SNP-A-A-G	8.12714e-05	COL2A1
952	NFATC2 Non_Silent	0.000146787	NFATC2	ERBB3 105.0 Non_Silent	8.08618e-05	ERBB3	ROBO2 10565.0 Intron	0.000205072	ROBO2	PRRX1 1448.0 UTR	3.09494e-05	PRRX1	BUB1 807.0 Flank	3.53476e-07	BUB1	C5 208.0 Synonymous	7.98887e-05	C5
953	PMS1 Intron	0.000146634	PMS1	100715486-100715486-chr8-Missense_Mutation-SNP-G-G-A	8.07037e-05	PABPC1	STAT5B 262.0 Intron	0.000205037	STAT5B	FANCD2 UTR	3.07255e-05	FANCD2	IDH1 0.0 Flank	3.50031e-07	IDH1	50974246-50974246-chr1-Synonymous-SNP-T-T-G	7.96024e-05	CDKN2C
954	BRD4 182.0 Intron	0.000146095	BRD4	RBM15 Non_Silent	8.04919e-05	RBM15	RPL10 Intron	0.000204864	RPL10	ZNF331 UTR	3.07235e-05	ZNF331	32438918-32438918-chr11-5'Flank-SNP-G-G-A	3.48823e-07	WT1	ACSL6 Synonymous	7.92927e-05	ACSL6
955	TRIM33 105.0 Intron	0.00014533	TRIM33	MUC16 1233.0 Non_Silent	8.04273e-05	MUC16	NRAS 235.0 Intron	0.000204311	NRAS	HMGA2 UTR	3.03296e-05	HMGA2	86866441-86866441-chr8-5'Flank-SNP-G-G-T	3.45564e-07	CNBD1	TSC1 Synonymous	7.80143e-05	TSC1
956	PRDM1 Non_Silent	0.000145179	PRDM1	8910500-8910500-chr19-Missense_Mutation-SNP-C-C-G	8.02431e-05	MUC16	MAP3K1 Intron	0.000204165	MAP3K1	APOBEC3B UTR	2.97778e-05	APOBEC3B	S100A7 0.0 Flank	3.44442e-07	S100A7	1915109-1915109-chr20-Synonymous-SNP-T-T-G	7.80057e-05	SIRPA
957	EED Intron	0.000145095	EED	SGK1 38.0 Non_Silent	8.01202e-05	SGK1	FH Intron	0.000203625	FH	163415144-163415146-chr6-5'UTR-DEL-CGG-CGG--	2.97754e-05	QKI	167976287-167976287-chr6-3'Flank-SNP-T-T-G	3.43184e-07	MLLT4	SDHC Synonymous	7.77144e-05	SDHC
958	TAF1 1157.0 Intron	0.000144934	TAF1	PTPN11 Non_Silent	7.94719e-05	PTPN11	BRIP1 1990.0 Intron	0.000202584	BRIP1	9719424-9719424-chrX-3'UTR-DEL-A-A--	2.96372e-05	TBL1X	207052198-207052198-chr1-5'Flank-SNP-G-G-T	3.42422e-07	YOD1	SLC45A3 Synonymous	7.72343e-05	SLC45A3
959	29268467-29268467-chr22-Intron-SNP-A-A-C	0.000144822	EWSR1	DROSHA Non_Silent	7.92209e-05	DROSHA	RABEP1 Intron	0.000202533	RABEP1	MNX1 UTR	2.95593e-05	MNX1	POT1 Flank	3.41366e-07	POT1	CCND1 Synonymous	7.67023e-05	CCND1
960	KTN1 Intron	0.000144805	KTN1	PHF6 Non_Silent	7.85428e-05	PHF6	75556687-75556688-chr7-Intron-DEL-AA-AA--	0.000201963	HIP1	C3 UTR	2.94701e-05	C3	DDX5 0.0 Flank	3.38427e-07	DDX5	PAX3 Synonymous	7.61088e-05	PAX3
961	26773691-26773693-chr1-In_Frame_Del-DEL-GCA-GCA--	0.00014455	ARID1A	HIST1H3B Non_Silent	7.82638e-05	HIST1H3B	41143014-41143015-chr5-Splice_Region-DEL-GA-GA--	0.000201747	C6	51356548-51356549-chr1-3'UTR-DEL-AA-AA--	2.9436e-05	EPS15	10740151-10740152-chr22-5'Flank-DEL-AA-AA--	3.31701e-07	U2	PDE4DIP 2815.0 Synonymous	7.59403e-05	PDE4DIP
962	AMT Intron	0.0001444	AMT	GNAS Non_Silent	7.78712e-05	GNAS	40086994-40086995-chr17-Intron-DEL-AC-AC--	0.000201398	THRA	LARP4 1504.0 UTR	2.92535e-05	LARP4	110333763-110333763-chr1-5'Flank-SNP-G-G-T	3.31461e-07	RBM15	CANT1 Synonymous	7.54941e-05	CANT1
963	PER1 Intron	0.000144311	PER1	42333743-42333743-chr17-Missense_Mutation-SNP-G-G-C	7.78361e-05	STAT3	ETV4 Intron	0.000201006	ETV4	RUNX1 5225.0 UTR	2.87632e-05	RUNX1	FOXO1 0.0 Flank	3.30758e-07	FOXO1	ZNF479 140.0 Synonymous	7.49893e-05	ZNF479
964	KMT2C 2605.0 Synonymous	0.000144231	KMT2C	FBL Non_Silent	7.73277e-05	FBL	55201370-55201371-chr7-Intron-DEL-TC-TC--	0.000199595	EGFR	SRSF3 UTR	2.86718e-05	SRSF3	93320312-93320312-chr9-3'Flank-SNP-C-C-T	3.24947e-07	WNK2	101357534-101357534-chrX-Synonymous-SNP-T-T-G	7.49537e-05	BTK
965	CDC73 402.0 Intron	0.000144179	CDC73	152229931-152229931-chr7-Missense_Mutation-SNP-T-T-C	7.72638e-05	KMT2C	ERCC3 Intron	0.000199524	ERCC3	EWSR1 3.0 UTR	2.80285e-05	EWSR1	ANK1 4830.0 Flank	3.24066e-07	ANK1	120962708-120962708-chr9-Synonymous-SNP-A-A-G	7.49188e-05	C5
966	MYB Intron	0.000144036	MYB	PLCG1 Non_Silent	7.71506e-05	PLCG1	17841830-17841830-chr19-Intron-SNP-A-A-C	0.000199442	JAK3	SDHC 1022.0 UTR	2.79347e-05	SDHC	27200884-27200885-chr7-5'Flank-DEL-CA-CA--	3.22157e-07	HOXA13	138918756-138918756-chr7-Synonymous-SNP-T-T-G	7.45852e-05	KIAA1549
967	PABPC1 43.0 Non_Silent	0.000143602	PABPC1	IL21R 709.0 Non_Silent	7.66129e-05	IL21R	ROBO2 10136.0 Intron	0.000198951	ROBO2	114397589-114397590-chr1-3'UTR-INS-----T	2.79049e-05	TRIM33	HOXA13 0.0 Flank	3.18452e-07	HOXA13	COL3A1 400.0 Synonymous	7.4309e-05	COL3A1
968	ERBB2 Synonymous	0.000143466	ERBB2	72788110-72788112-chr16-In_Frame_Del-DEL-TGC-TGC--	7.64546e-05	ZFHX3	PABPC1 198.0 Intron	0.000197304	PABPC1	EN1 UTR	2.78834e-05	EN1	85463274-85463274-chr8-5'Flank-SNP-C-C-A	3.16734e-07	CA2	POU2AF1 Synonymous	7.41109e-05	POU2AF1
969	PDE4DIP 2311.0 Non_Silent	0.000142949	PDE4DIP	152248143-152248143-chr7-Missense_Mutation-SNP-G-G-A	7.63809e-05	KMT2C	61780729-61780731-chr17-Intron-DEL-AAC-AAC--	0.000195416	BRIP1	FCGR2B UTR	2.74356e-05	FCGR2B	ZNF429 0.0 Flank	3.11322e-07	ZNF429	MTOR 3009.0 Synonymous	7.35089e-05	MTOR
970	OTC Intron	0.00014294	OTC	RANBP2 965.0 Non_Silent	7.61829e-05	RANBP2	8896192-8896194-chr19-Intron-DEL-AGT-AGT--	0.00019457	MUC16	ZCCHC8 37.0 UTR	2.74262e-05	ZCCHC8	167976186-167976186-chr6-3'Flank-SNP-T-T-C	3.10822e-07	MLLT4	29942806-29942806-chr6-Synonymous-SNP-C-C-T	7.34998e-05	HLA-A
971	ATR Intron	0.000142881	ATR	28695852-28695852-chr22-Missense_Mutation-SNP-T-T-C	7.55456e-05	CHEK2	29197729-29197730-chr2-Intron-INS-----CA	0.000194456	ALK	TRIM24 2514.0 UTR	2.65191e-05	TRIM24	142615471-142615471-chr8-5'Flank-SNP-G-G-A	3.10352e-07	ARC	100709642-100709642-chr8-Synonymous-SNP-G-G-A	7.33234e-05	PABPC1
972	DDX10 5058.0 Non_Silent	0.000142877	DDX10	152238825-152238825-chr7-Missense_Mutation-SNP-C-C-T	7.54772e-05	KMT2C	STAT3 Intron	0.000194176	STAT3	PSIP1 925.0 UTR	2.62478e-05	PSIP1	134428854-134428854-chrX-3'Flank-SNP-T-T-C	3.09289e-07	PHF6	HOXA11 Synonymous	7.28677e-05	HOXA11
973	KIAA1598 Intron	0.000142842	KIAA1598	MUC4 686.0 Non_Silent	7.54652e-05	MUC4	DAXX Intron	0.000193576	DAXX	PAX8 UTR	2.60249e-05	PAX8	32440110-32440110-chr11-5'Flank-SNP-C-C-A	3.0731e-07	WT1	49039257-49039257-chr12-Synonymous-SNP-T-T-G	7.26449e-05	KMT2D
974	FOXO1 Non_Silent	0.000142721	FOXO1	ZNF429 Non_Silent	7.54335e-05	ZNF429	JAK3 341.0 Intron	0.000193253	JAK3	ROS1 2.0 UTR	2.57244e-05	ROS1	113122633-113122633-chr13-3'Flank-SNP-T-T-C	3.04968e-07	F7	26766305-26766305-chr1-Synonymous-SNP-C-C-G	7.26198e-05	ARID1A
975	100709223-100709223-chr8-Missense_Mutation-SNP-T-T-A	0.000142719	PABPC1	DNMT3A 365.0 Non_Silent	7.52515e-05	DNMT3A	SUFU 1379.0 Intron	0.000193245	SUFU	29945619-29945619-chr6-3'UTR-SNP-A-A-C	2.55638e-05	HLA-A	167825792-167825792-chr6-5'Flank-SNP-G-G-T	2.92736e-07	MLLT4	TRIM24 Synonymous	7.26184e-05	TRIM24
976	FLI1 Intron	0.000142324	FLI1	PIK3CA 1013.0 Non_Silent	7.51997e-05	PIK3CA	TRIM2 Intron	0.000192987	TRIM2	ID1 1.0 UTR	2.54612e-05	ID1	71235748-71235755-chrX-3'Flank-DEL-CTTCCTTC-CTTCCTTC--	2.91749e-07	ZMYM3	XPA Synonymous	7.26096e-05	XPA
977	TNC 408.0 Intron	0.000141541	TNC	ESR1 Non_Silent	7.46986e-05	ESR1	46381403-46381403-chr2-Intron-SNP-C-C-G	0.000192168	EPAS1	ARHGAP26 UTR	2.53938e-05	ARHGAP26	190177917-190177917-chr4-3'Flank-SNP-T-T-C	2.90191e-07	DUX4	KMT2D 298.0 Synonymous	7.17635e-05	KMT2D
978	XPO1 Intron	0.000141406	XPO1	EGF Non_Silent	7.44794e-05	EGF	ALB Intron	0.000192062	ALB	ERCC5 28.0 UTR	2.5367e-05	ERCC5	OLIG2 67.0 Flank	2.8201e-07	OLIG2	ITK Synonymous	7.17062e-05	ITK
979	NFE2L2 79.0 Non_Silent	0.000141183	NFE2L2	RBM10 527.0 Non_Silent	7.44221e-05	RBM10	CBFA2T3 Intron	0.000190584	CBFA2T3	MDS2 UTR	2.5113e-05	MDS2	10737705-10737705-chr22-5'Flank-SNP-A-A-G	2.81006e-07	U2	CHST11 Synonymous	7.16689e-05	CHST11
980	53495166-53495168-chr3-Missense_Mutation-DEL-GAT-GAT--	0.000140799	CACNA1D	RP1 228.0 Non_Silent	7.43418e-05	RP1	MITF Intron	0.000189957	MITF	CTNND1 UTR	2.50452e-05	CTNND1	10732714-10732714-chr22-3'Flank-SNP-T-T-C	2.80929e-07	U2	CP Synonymous	7.13505e-05	CP
981	MLLT1 66.0 Intron	0.000140573	MLLT1	MED12 441.0 Non_Silent	7.39375e-05	MED12	KMT2A 1316.0 Intron	0.000189898	KMT2A	CCNC UTR	2.47927e-05	CCNC	VAV1 0.0 Flank	2.80239e-07	VAV1	NUTM2A 149.0 Synonymous	7.12656e-05	NUTM2A
982	ID2 65.0 UTR	0.000140483	ID2	KIF5B Non_Silent	7.39141e-05	KIF5B	149181985-149181985-chr3-Intron-SNP-A-A-C	0.000189874	CP	2514579-2514580-chr4-3'UTR-INS-----CCA	2.4744e-05	RNF4	EIF3E 942.0 Flank	2.79723e-07	EIF3E	KDM5A Synonymous	7.10431e-05	KDM5A
983	ROS1 Non_Silent	0.000140344	ROS1	RPL22 255.0 Non_Silent	7.39095e-05	RPL22	100712790-100712790-chr8-Splice_Site-SNP-C-C-T	0.000189431	PABPC1	SND1 UTR	2.46372e-05	SND1	87235345-87235345-chr10-3'Flank-SNP-G-G-A	2.78451e-07	NUTM2A	188994290-188994290-chr2-Synonymous-SNP-A-A-C	7.05855e-05	COL3A1
984	CHD4 219.0 Intron	0.000139669	CHD4	149005097-149005097-chr1-Missense_Mutation-SNP-A-A-G	7.36866e-05	PDE4DIP	BTK 212.0 Intron	0.00018927	BTK	108665138-108665140-chr11-5'UTR-DEL-CGC-CGC--	2.44365e-05	DDX10	32386308-32386308-chr11-3'Flank-SNP-C-C-G	2.72183e-07	WT1	FGFR2 Synonymous	7.00023e-05	FGFR2
985	CRLF2 Intron	0.000139505	CRLF2	36473887-36473887-chr1-Missense_Mutation-SNP-T-T-G	7.35108e-05	CSF3R	5130513-5130513-chr17-Intron-SNP-G-G-C	0.000188924	USP6	CNBP 17.0 UTR	2.43112e-05	CNBP	41134475-41134475-chr20-5'Flank-SNP-G-G-T	2.69601e-07	PLCG1	157206613-157206613-chr6-Synonymous-SNP-T-T-G	6.97344e-05	ARID1B
986	MSH2 1364.0 Intron	0.000139308	MSH2	SMO Non_Silent	7.35077e-05	SMO	CDKN1A Intron	0.000188563	CDKN1A	CYLD 1090.0 UTR	2.42625e-05	CYLD	189012839-189012839-chr2-3'Flank-SNP-C-C-G	2.68516e-07	COL3A1	TP53 152.0 Synonymous	6.88969e-05	TP53
987	MYH1 Non_Silent	0.000138969	MYH1	236563-236563-chr5-Missense_Mutation-SNP-G-G-A	7.28037e-05	SDHA	PTK6 90.0 Intron	0.000188439	PTK6	29694825-29694825-chr22-3'UTR-SNP-A-A-C	2.40579e-05	NF2	204513134-204513134-chr1-5'Flank-SNP-G-G-A	2.63743e-07	MDM4	8910488-8910488-chr19-Synonymous-SNP-G-G-A	6.80993e-05	MUC16
988	APOB 32.0 Non_Silent	0.000138808	APOB	EP300 968.0 Non_Silent	7.27581e-05	EP300	WRN 1259.0 Intron	0.000188262	WRN	SH2B3 UTR	2.40443e-05	SH2B3	16076006-16076007-chr19-5'Flank-INS-----A	2.63726e-07	TPM4	PPP2R1A 428.0 Synonymous	6.78375e-05	PPP2R1A
989	KMT2C 2604.0 Non_Silent	0.000138619	KMT2C	MUC4 791.0 Non_Silent	7.24857e-05	MUC4	TRIM24 Intron	0.000187904	TRIM24	HIST1H4I UTR	2.39503e-05	HIST1H4I	71106804-71106804-chrX-3'Flank-SNP-A-A-G	2.63554e-07	FOXO4	TCF7 Synonymous	6.74416e-05	TCF7
990	TFG 708.0 Intron	0.000138577	TFG	CREB3L2 Non_Silent	7.22508e-05	CREB3L2	EGFR 2673.0 Intron	0.000187413	EGFR	CANT1 20.0 UTR	2.35898e-05	CANT1	ZBTB1 400.0 Flank	2.63332e-07	ZBTB1	87232865-87232865-chr10-Synonymous-SNP-C-C-T	6.74162e-05	NUTM2A
991	EPAS1 Intron	0.000138471	EPAS1	MEN1 Non_Silent	7.21656e-05	MEN1	COA1 Intron	0.000187146	COA1	118898323-118898323-chr11-3'UTR-SNP-G-G-A	2.35612e-05	BCL9L	129528622-129528623-chr3-5'Flank-INS-----G	2.57874e-07	RHO	HIP1 275.0 Synonymous	6.73353e-05	HIP1
992	CDK1 Non_Silent	0.000138248	CDK1	KMT2C 2263.0 Non_Silent	7.17494e-05	KMT2C	TBX3 Intron	0.000187143	TBX3	MDM4 UTR	2.33774e-05	MDM4	10732874-10732874-chr22-3'Flank-SNP-T-T-G	2.55155e-07	U2	MUC4 731.0 Synonymous	6.70129e-05	MUC4
993	PDGFB 352.0 Intron	0.000138246	PDGFB	MUTYH Non_Silent	7.14772e-05	MUTYH	CASP8 Intron	0.000186985	CASP8	ERCC5 622.0 UTR	2.33451e-05	ERCC5	21002991-21002991-chr22-3'Flank-SNP-G-G-T	2.52719e-07	LZTR1	DDX5 Synonymous	6.64742e-05	DDX5
994	TRIM2 Intron	0.000138059	TRIM2	RAF1 505.0 Non_Silent	7.13953e-05	RAF1	EGF 1004.0 Intron	0.000186641	EGF	117624727-117624727-chr1-3'UTR-DEL-A-A--	2.33275e-05	FAM46C	23322478-23322478-chr22-3'Flank-DEL-T-T--	2.5214e-07	BCR	BRAF 1319.0 Synonymous	6.53577e-05	BRAF
995	XPA 151.0 Intron	0.000138046	XPA	122361151-122361151-chr12-Missense_Mutation-SNP-C-C-A	7.10968e-05	CLIP1	177267479-177267480-chr5-Intron-DEL-AT-AT--	0.000186232	NSD1	7767904-7767904-chr1-3'UTR-DEL-A-A--	2.32966e-05	CAMTA1	99821691-99821692-chr9-5'Flank-DEL-CG-CG--	2.46053e-07	NR4A3	140335650-140335650-chr2-Synonymous-SNP-T-T-C	6.45041e-05	LRP1B
996	RCC2 Intron	0.00013801	RCC2	NF2 Non_Silent	7.08132e-05	NF2	25666102-25666105-chr4-Intron-DEL-TTTG-TTTG--	0.000186202	SLC34A2	55684263-55684263-chr14-3'UTR-DEL-A-A--	2.32419e-05	KTN1	CYSLTR2 95.0 Flank	2.44526e-07	CYSLTR2	102416883-102416883-chr10-Synonymous-SNP-A-A-C	6.44702e-05	PSD
997	DNMT3A Intron	0.000137862	DNMT3A	FANCE Non_Silent	7.07236e-05	FANCE	17027879-17027881-chr1-Intron-DEL-GAA-GAA--	0.000186003	SDHB	LMO2 16.0 UTR	2.32414e-05	LMO2	118751068-118751069-chr11-3'Flank-DEL-TA-TA--	2.44147e-07	DDX6	FLT4 298.0 Synonymous	6.43128e-05	FLT4
998	ERC1 Non_Silent	0.000137841	ERC1	RPL10 50.0 Non_Silent	7.05355e-05	RPL10	132873309-132873309-chr8-Intron-SNP-T-T-C	0.000185981	TG	F3 21.0 UTR	2.30739e-05	F3	10026113-10026113-chr3-5'Flank-SNP-T-T-C	2.36475e-07	FANCD2	44952880-44952880-chr18-Synonymous-SNP-C-C-A	6.42688e-05	SETBP1
999	DAXX 32.0 Non_Silent	0.000137629	DAXX	LRP1B 5409.0 Non_Silent	7.03411e-05	LRP1B	PTPN6 19.0 Intron	0.000185856	PTPN6	MAL UTR	2.26003e-05	MAL	50180924-50180925-chr17-3'Flank-DEL-AA-AA--	2.33275e-07	COL1A1	AIP Synonymous	6.38393e-05	AIP
1000	131127655-131127655-chr9-Missense_Mutation-SNP-G-G-T	0.000137428	NUP214	CTNND1 Non_Silent	7.02718e-05	CTNND1	CRTC3 Intron	0.000185814	CRTC3	CXCR4 UTR	2.25283e-05	CXCR4	64497225-64497225-chr17-3'Flank-SNP-T-T-C	2.32293e-07	DDX5	FCGR2B Synonymous	6.33756e-05	FCGR2B
1001	GNA11 Synonymous	0.000137085	GNA11	CREB3L1 Non_Silent	7.00586e-05	CREB3L1	RCE1 Intron	0.000185591	RCE1	SDHD 1.0 UTR	2.24536e-05	SDHD	53416350-53416353-chr12-3'Flank-DEL-TTTT-TTTT--	2.31817e-07	SP1	FOXO3 2081.0 Synonymous	6.2857e-05	FOXO3
1002	BAP1 Intron	0.000136846	BAP1	SMARCB1 97.0 Non_Silent	6.99963e-05	SMARCB1	29943620-29943620-chr6-Intron-SNP-T-T-A	0.000185251	HLA-A	1253629-1253629-chr5-3'UTR-SNP-G-G-A	2.23297e-05	TERT	39603861-39603862-chr13-5'Flank-DEL-TC-TC--	2.27136e-07	LHFP	APOBEC3B 74.0 Synonymous	6.27957e-05	APOBEC3B
1003	SYK Synonymous	0.000136511	SYK	CHST11 Non_Silent	6.92008e-05	CHST11	PPP6C Intron	0.00018496	PPP6C	DDR2 UTR	2.21699e-05	DDR2	10732493-10732493-chr22-3'Flank-SNP-G-G-A	2.26537e-07	U2	FAT3 8952.0 Synonymous	6.27507e-05	FAT3
1004	POU5F1 Non_Silent	0.000136487	POU5F1	SS18 Non_Silent	6.91506e-05	SS18	BRCA1 933.0 Intron	0.000184902	BRCA1	ALK 8.0 UTR	2.17802e-05	ALK	GAS7 0.0 Flank	2.26356e-07	GAS7	STAT5B Synonymous	6.26632e-05	STAT5B
1005	HLA-A 48.0 Intron	0.000136142	HLA-A	27095698-27095700-chr7-In_Frame_Del-DEL-TGG-TGG--	6.89411e-05	HOXA1	BCL9 Intron	0.000184785	BCL9	RNF2 UTR	2.16405e-05	RNF2	NR4A3 0.0 Flank	2.26289e-07	NR4A3	C6 Synonymous	6.1759e-05	C6
1006	CLTCL1 Intron	0.000136094	CLTCL1	61492168-61492168-chr2-Missense_Mutation-SNP-C-C-A	6.88925e-05	XPO1	TNFRSF14 Intron	0.00018468	TNFRSF14	ID1 17.0 UTR	2.13281e-05	ID1	190179635-190179635-chr4-3'Flank-SNP-A-A-G	2.22826e-07	DUX4	5130385-5130385-chr17-Synonymous-SNP-T-T-C	6.17571e-05	USP6
1007	MALAT1 33.0 Flank	0.00013591	MALAT1	LCK Non_Silent	6.88437e-05	LCK	32035791-32035792-chr10-Intron-DEL-TC-TC--	0.000184435	KIF5B	153336117-153336118-chr4-3'UTR-DEL-TA-TA--	2.12722e-05	TRIM2	65503824-65503846-chr11-5'Flank-DEL-CATAAAGTGATGAGCATATAATA-CATAAAGTGATGAGCATATAATA--	2.21592e-07	MALAT1	EGF 1907.0 Synonymous	6.1246e-05	EGF
1008	BRD3 403.0 Synonymous	0.00013578	BRD3	29942772-29942772-chr6-Missense_Mutation-SNP-G-G-A	6.86278e-05	HLA-A	110008313-110008314-chr4-Intron-DEL-CA-CA--	0.000184177	EGF	HERPUD1 2.0 UTR	2.09004e-05	HERPUD1	6663205-6663205-chr12-3'Flank-SNP-G-G-A	2.15328e-07	ZNF384	4278918-4278918-chr12-Splice_Region-SNP-C-C-G	6.09155e-05	CCND2
1009	SDHA 764.0 Synonymous	0.000135587	SDHA	MLH1 Non_Silent	6.85604e-05	MLH1	IDH1 Intron	0.000183079	IDH1	MECOM 935.0 UTR	2.07666e-05	MECOM	32440073-32440088-chr11-5'Flank-DEL-AAAAAAAAAAAAAAAA-AAAAAAAAAAAAAAAA--	2.13117e-07	WT1	128911735-128911735-chr11-Synonymous-SNP-C-C-T	6.08315e-05	KCNJ5
1010	NOTCH1 42.0 Non_Silent	0.000135552	NOTCH1	136518645-136518645-chr9-Missense_Mutation-SNP-T-T-G	6.84776e-05	NOTCH1	CCDC6 517.0 Intron	0.000182316	CCDC6	A1CF UTR	2.06505e-05	A1CF	93319203-93319203-chr9-3'Flank-SNP-C-C-A	2.12441e-07	WNK2	KIF5B Synonymous	6.08208e-05	KIF5B
1011	ELN Non_Silent	0.000135116	ELN	DICER1 204.0 Non_Silent	6.8458e-05	DICER1	SSX1 Intron	0.000181685	SSX1	TAT 49.0 UTR	2.05242e-05	TAT	TP63 5319.0 Flank	2.10677e-07	TP63	MUC16 2627.0 Synonymous	6.06319e-05	MUC16
1012	WHSC1 Non_Silent	0.000135101	WHSC1	SPECC1 Non_Silent	6.83885e-05	SPECC1	CS Intron	0.000181638	CS	CCR7 234.0 UTR	2.05191e-05	CCR7	169663475-169663490-chr3-5'Flank-DEL-TCTCTCTCTCTCTCTC-TCTCTCTCTCTCTCTC--	2.09435e-07	MECOM	TFE3 37.0 Synonymous	6.05424e-05	TFE3
1013	DNM2 Intron	0.000134493	DNM2	NUTM2A Non_Silent	6.83244e-05	NUTM2A	GNA11 Intron	0.000180981	GNA11	ID1 24.0 UTR	2.03617e-05	ID1	35917273-35917274-chr17-3'Flank-INS-----G	2.06247e-07	RDM1	GK Synonymous	6.03395e-05	GK
1014	NF2 Non_Silent	0.000134319	NF2	ERG Non_Silent	6.77122e-05	ERG	MYH11 633.0 Intron	0.000180967	MYH11	JAK3 UTR	2.02018e-05	JAK3	32440015-32440015-chr11-5'Flank-DEL-A-A--	2.02836e-07	WT1	31170600-31170600-chr6-Synonymous-SNP-C-C-T	6.00075e-05	POU5F1
1015	99828334-99828336-chr9-In_Frame_Del-DEL-CAC-CAC--	0.000133913	NR4A3	PIK3R1 Non_Silent	6.76154e-05	PIK3R1	ISX Intron	0.000180401	ISX	122456450-122456450-chr4-5'UTR-SNP-A-A-G	2.0175e-05	IL2	PBRM1 0.0 Flank	2.02093e-07	PBRM1	KIAA1598 Synonymous	5.99845e-05	KIAA1598
1016	MUC4 763.0 Non_Silent	0.000133894	MUC4	EIF4A2 49.0 Non_Silent	6.73108e-05	EIF4A2	211624104-211624105-chr2-Intron-DEL-TC-TC--	0.000180051	ERBB4	ATRX 67.0 UTR	2.00558e-05	ATRX	193121782-193121783-chr1-5'Flank-DEL-CG-CG--	2.01245e-07	CDC73	29944591-29944591-chr6-Synonymous-SNP-C-C-T	5.99783e-05	HLA-A
1017	ZFHX3 3499.0 Non_Silent	0.00013377	ZFHX3	14158609-14158609-chr3-Missense_Mutation-SNP-G-G-C	6.72668e-05	XPC	LSM14A Intron	0.000178402	LSM14A	HLA-A 90.0 UTR	1.99635e-05	HLA-A	97699542-97699542-chr9-5'Flank-SNP-G-G-A	2.00315e-07	XPA	FUS 100.0 Synonymous	5.98401e-05	FUS
1018	HSP90AA1 82.0 Non_Silent	0.000133605	HSP90AA1	XPC 262.0 Non_Silent	6.71398e-05	XPC	PCM1 1826.0 Intron	0.000178187	PCM1	USP8 UTR	1.9777e-05	USP8	155195276-155195276-chr1-5'Flank-SNP-G-G-C	1.99695e-07	MUC1	BTK 162.0 Synonymous	5.96303e-05	BTK
1019	ERG 1358.0 Intron	0.000133412	ERG	RECQL Non_Silent	6.68166e-05	RECQL	533418-533418-chr11-Intron-SNP-T-T-G	0.000177773	HRAS	52340665-52340665-chr18-5'UTR-SNP-G-G-C	1.96977e-05	DCC	10739233-10739233-chr22-5'Flank-SNP-T-T-C	1.99028e-07	U2	100712772-100712772-chr8-Synonymous-SNP-G-G-A	5.92553e-05	PABPC1
1020	PIK3CB 621.0 Non_Silent	0.000133341	PIK3CB	TET1 1695.0 Non_Silent	6.65102e-05	TET1	195811631-195811634-chr3-Intron-DEL-TCTC-TCTC--	0.000177737	MUC4	109910737-109910738-chr1-5'UTR-DEL-GT-GT--	1.96444e-05	CSF1	32439480-32439480-chr11-5'Flank-DEL-G-G--	1.96533e-07	WT1	77477463-77477463-chr3-Synonymous-SNP-T-T-G	5.83861e-05	ROBO2
1021	DDX1 Intron	0.00013329	DDX1	LMNA 396.0 Non_Silent	6.63315e-05	LMNA	CRNKL1 Intron	0.00017706	CRNKL1	ARHGEF1 UTR	1.94521e-05	ARHGEF1	PTPN13 Flank	1.95877e-07	PTPN13	WAS 44.0 Synonymous	5.8285e-05	WAS
1022	KMT2C 2603.0 Synonymous	0.000132942	KMT2C	PHOX2B 41.0 Non_Silent	6.62878e-05	PHOX2B	GK Intron	0.000176967	GK	VTI1A 7363.0 UTR	1.94463e-05	VTI1A	ARC 0.0 Flank	1.91658e-07	ARC	3006910-3006910-chr11-Synonymous-SNP-G-G-A	5.79716e-05	CARS
1023	GNAS UTR	0.000132932	GNAS	H3F3B Non_Silent	6.6228e-05	H3F3B	8896164-8896164-chr19-Intron-SNP-C-C-T	0.000176961	MUC16	GK 3.0 UTR	1.94422e-05	GK	34893027-34893028-chr21-5'Flank-DEL-TT-TT--	1.91518e-07	RUNX1	MUC4 696.0 Synonymous	5.7957e-05	MUC4
1024	MED12 442.0 Non_Silent	0.000132666	MED12	BCL11A Non_Silent	6.59392e-05	BCL11A	BCOR Intron	0.000176532	BCOR	CBLB UTR	1.9266e-05	CBLB	134318130-134318130-chr6-5'Flank-SNP-T-T-C	1.90209e-07	SGK1	GPC3 4359.0 Synonymous	5.7122e-05	GPC3
1025	BMP5 Non_Silent	0.000132587	BMP5	HNRNPA2B1 Non_Silent	6.58219e-05	HNRNPA2B1	IL21R Intron	0.000176258	IL21R	EPHA3 3.0 UTR	1.92243e-05	EPHA3	132863554-132863554-chr8-5'Flank-SNP-G-G-C	1.88626e-07	TG	STRN Synonymous	5.69027e-05	STRN
1026	TSC1 106.0 Non_Silent	0.00013253	TSC1	PAX5 Non_Silent	6.57252e-05	PAX5	5130329-5130329-chr17-Intron-SNP-C-C-T	0.000176029	USP6	IL21 UTR	1.91812e-05	IL21	10732831-10732831-chr22-3'Flank-SNP-C-C-T	1.87734e-07	U2	KDM6A 4117.0 Synonymous	5.67919e-05	KDM6A
1027	31096742-31096742-chr8-Intron-SNP-C-C-T	0.000132458	WRN	POLE 1073.0 Non_Silent	6.53803e-05	POLE	STK11 Intron	0.000175858	STK11	SMARCD1 UTR	1.88884e-05	SMARCD1	PPP2R1A 0.0 Flank	1.79827e-07	PPP2R1A	27798195-27798195-chr22-Synonymous-SNP-A-A-C	5.65079e-05	MN1
1028	MGA Synonymous	0.000132347	MGA	THRA Non_Silent	6.52211e-05	THRA	23836353-23836354-chr16-Splice_Region-DEL-GC-GC--	0.000175186	PRKCB	STAG1 UTR	1.88303e-05	STAG1	USP6 934.0 Flank	1.79734e-07	USP6	BRAF Synonymous	5.5963e-05	BRAF
1029	ALK 2080.0 Intron	0.00013223	ALK	TBL1X 4463.0 Non_Silent	6.51289e-05	TBL1X	RLF Intron	0.000174248	RLF	LMO1 782.0 UTR	1.87619e-05	LMO1	69757328-69757328-chr16-5'Flank-SNP-C-C-T	1.79173e-07	WWP2	LARP4 Synonymous	5.58735e-05	LARP4
1030	256264-256264-chr5-Intron-SNP-C-C-T	0.000132031	SDHA	131127665-131127665-chr9-Missense_Mutation-SNP-C-C-T	6.47067e-05	NUP214	140370686-140370687-chr2-Intron-DEL-CA-CA--	0.000173383	LRP1B	26780782-26780783-chr1-3'UTR-DEL-GT-GT--	1.86787e-05	ARID1A	25679124-25679124-chr4-3'Flank-DEL-A-A--	1.78146e-07	SLC34A2	SND1 Synonymous	5.57332e-05	SND1
1031	SMO Non_Silent	0.000131887	SMO	MUC16 1213.0 Non_Silent	6.45528e-05	MUC16	16117823-16117825-chr17-Intron-DEL-AAC-AAC--	0.000173186	NCOR1	29945576-29945576-chr6-3'UTR-SNP-T-T-C	1.85417e-05	HLA-A	190177921-190177921-chr4-3'Flank-SNP-T-T-C	1.73534e-07	DUX4	HEY1 Synonymous	5.55518e-05	HEY1
1032	EPS15 Intron	0.00013186	EPS15	MUC16 2218.0 Non_Silent	6.43625e-05	MUC16	HLA-A 29.0 Intron	0.000173053	HLA-A	CTNND2 UTR	1.85285e-05	CTNND2	BCL6 0.0 Flank	1.72576e-07	BCL6	ABI1 Synonymous	5.53404e-05	ABI1
1033	F2 Intron	0.000131735	F2	ELK4 Non_Silent	6.43108e-05	ELK4	RNF213 1839.0 Intron	0.000172445	RNF213	ACKR3 UTR	1.84271e-05	ACKR3	49619850-49619850-chr12-5'Flank-DEL-T-T--	1.69464e-07	PRPF40B	CYSLTR2 Synonymous	5.44293e-05	CYSLTR2
1034	ERCC3 Synonymous	0.000131626	ERCC3	FANCF Non_Silent	6.42233e-05	FANCF	SH2B3 Intron	0.000172288	SH2B3	CTNNA2 19929.0 UTR	1.83558e-05	CTNNA2	75784589-75784591-chr17-5'Flank-DEL-AAG-AAG--	1.68984e-07	H3F3B	FIP1L1 Synonymous	5.4124e-05	FIP1L1
1035	MED12 443.0 Non_Silent	0.000131551	MED12	HLA-A 42.0 Non_Silent	6.42214e-05	HLA-A	NUTM2A Intron	0.000172135	NUTM2A	TSC2 UTR	1.82342e-05	TSC2	33009897-33009897-chr1-3'Flank-DEL-A-A--	1.62911e-07	AK2	KTN1 Synonymous	5.38827e-05	KTN1
1036	JAK2 Intron	0.000131504	JAK2	PABPC1 76.0 Non_Silent	6.41466e-05	PABPC1	TPM4 Intron	0.000171976	TPM4	FLCN UTR	1.81752e-05	FLCN	PAX5 Flank	1.62401e-07	PAX5	PER1 28.0 Synonymous	5.38108e-05	PER1
1037	CHD7 3555.0 Non_Silent	0.000131504	CHD7	ABI1 Non_Silent	6.39912e-05	ABI1	MYH11 1893.0 Intron	0.000170952	MYH11	PTEN 2049.0 UTR	1.81276e-05	PTEN	65124204-65124204-chr16-5'Flank-SNP-T-T-C	1.62371e-07	CDH11	102085912-102085912-chr14-Synonymous-SNP-A-A-C	5.36618e-05	HSP90AA1
1038	ERBB2 Intron	0.00013131	ERBB2	10496144-10496144-chr17-Missense_Mutation-SNP-G-G-T	6.39887e-05	MYH1	SUFU 1380.0 Intron	0.000170782	SUFU	6465725-6465725-chr11-5'UTR-SNP-A-A-C	1.80883e-05	TRIM3	161379202-161379202-chr1-3'Flank-SNP-T-T-C	1.61375e-07	SDHC	ACSL3 Synonymous	5.2394e-05	ACSL3
1039	EIF1AX Intron	0.000131203	EIF1AX	25676526-25676528-chr4-In_Frame_Del-DEL-GCT-GCT--	6.3862e-05	SLC34A2	PDC Intron	0.000170714	PDC	148807625-148807625-chr7-3'UTR-DEL-G-G--	1.7976e-05	EZH2	BCL3 0.0 Flank	1.60894e-07	BCL3	195786555-195786555-chr3-Synonymous-SNP-G-G-T	5.2077e-05	MUC4
1040	MYH1 Intron	0.000131088	MYH1	9060352-9060352-chr3-Missense_Mutation-SNP-G-G-C	6.36543e-05	SRGAP3	86268595-86268600-chr11-Intron-DEL-GTGTGT-GTGTGT--	0.000170471	EED	JAK3 37.0 UTR	1.78682e-05	JAK3	MNX1 0.0 Flank	1.58943e-07	MNX1	TLX3 9.0 Synonymous	5.17678e-05	TLX3
1041	MDM4 Intron	0.000131069	MDM4	CSMD3 2278.0 Non_Silent	6.31794e-05	CSMD3	TBL1XR1 Intron	0.00016986	TBL1XR1	GRM3 UTR	1.78241e-05	GRM3	3797872-3797872-chr11-5'Flank-SNP-T-T-G	1.57605e-07	NUP98	92800126-92800126-chr11-Synonymous-SNP-C-C-T	5.09286e-05	FAT3
1042	BCL3 Intron	0.000130954	BCL3	CR1 2366.0 Non_Silent	6.28068e-05	CR1	45893388-45893391-chr12-Intron-DEL-TCTC-TCTC--	0.000169654	ARID2	100703121-100703121-chr8-3'UTR-SNP-G-G-T	1.77533e-05	PABPC1	207491739-207491739-chr1-5'Flank-SNP-C-C-G	1.56575e-07	CR1	PABPC1 135.0 Synonymous	5.09198e-05	PABPC1
1043	RSPO2 1676.0 Intron	0.000130639	RSPO2	148229750-148229750-chr7-Missense_Mutation-SNP-A-A-C	6.26751e-05	CNTNAP2	RGPD3 1265.0 Intron	0.000169236	RGPD3	2906503-2906503-chr7-3'UTR-SNP-G-G-T	1.76145e-05	CARD11	DUX4 0.0 Flank	1.5299e-07	DUX4	MPL Synonymous	5.0713e-05	MPL
1044	41227186-41227187-chr3-Intron-DEL-AT-AT--	0.000130236	CTNNB1	AK2 7.0 Non_Silent	6.24918e-05	AK2	LRP1 1460.0 Intron	0.000167375	LRP1	EIF4A2 1.0 UTR	1.76135e-05	EIF4A2	CER1 61.0 Flank	1.51397e-07	CER1	29942809-29942809-chr6-Synonymous-SNP-G-G-A	5.05065e-05	HLA-A
1045	ARID1A 1692.0 Non_Silent	0.000130182	ARID1A	BCL3 Non_Silent	6.22559e-05	BCL3	32975409-32975409-chr7-Intron-SNP-C-C-T	0.000167267	FKBP9	CD79B 71.0 UTR	1.75911e-05	CD79B	71107339-71107339-chrX-3'Flank-SNP-T-T-C	1.50646e-07	FOXO4	ZFHX3 97.0 Synonymous	5.01819e-05	ZFHX3
1046	DICER1 Non_Silent	0.000130058	DICER1	MB Non_Silent	6.22163e-05	MB	42293912-42293912-chr19-Intron-SNP-A-A-G	0.000167069	CIC	SMARCA4 UTR	1.68995e-05	SMARCA4	10736357-10736357-chr22-5'Flank-SNP-G-G-T	1.50069e-07	U2	MALT1 Synonymous	4.99248e-05	MALT1
1047	ASXL2 1314.0 Non_Silent	0.000130038	ASXL2	HOXA13 79.0 Non_Silent	6.19256e-05	HOXA13	ZNF384 Intron	0.000166943	ZNF384	29945533-29945533-chr6-3'UTR-SNP-G-G-C	1.64147e-05	HLA-A	118750264-118750264-chr11-3'Flank-DEL-A-A--	1.49538e-07	DDX6	56094530-56094530-chr12-Synonymous-SNP-G-G-C	4.99225e-05	ERBB3
1048	77956752-77956753-chr1-Intron-DEL-CA-CA--	0.000129998	FUBP1	TET2 Non_Silent	6.18992e-05	TET2	NCOA4 32.0 Intron	0.000166796	NCOA4	PPARG 1.0 UTR	1.64103e-05	PPARG	92352072-92352073-chr11-5'Flank-DEL-TC-TC--	1.49307e-07	FAT3	57120437-57120437-chr7-Synonymous-SNP-C-C-T	4.94741e-05	ZNF479
1049	2945728-2945735-chr7-Intron-DEL-ACACACAC-ACACACAC--	0.000129975	CARD11	PDE4DIP 848.0 Non_Silent	6.18406e-05	PDE4DIP	ARAF Intron	0.000166372	ARAF	MAFB 25.0 UTR	1.64007e-05	MAFB	49619611-49619611-chr12-5'Flank-SNP-C-C-A	1.4913e-07	PRPF40B	CREB1 Synonymous	4.90356e-05	CREB1
1050	108917908-108917910-chr11-In_Frame_Del-DEL-TGA-TGA--	0.000129743	DDX10	C7 Non_Silent	6.17046e-05	C7	T Intron	0.00016562	T	SFPQ UTR	1.62094e-05	SFPQ	4308066-4308066-chr12-3'Flank-SNP-C-C-G	1.48675e-07	CCND2	SPEN 1761.0 Synonymous	4.86351e-05	SPEN
1051	KAT6A 229.0 Non_Silent	0.000129622	KAT6A	25245350-25245350-chr12-Missense_Mutation-SNP-C-C-T	6.16534e-05	KRAS	HEY1 Intron	0.000165378	HEY1	ZNF3 UTR	1.60128e-05	ZNF3	10739876-10739876-chr22-5'Flank-SNP-A-A-G	1.48392e-07	U2	DCAF12 Synonymous	4.85816e-05	DCAF12
1052	KAT6B Non_Silent	0.000129527	KAT6B	HSP90AB1 130.0 Non_Silent	6.1539e-05	HSP90AB1	10046830-10046830-chr3-Intron-SNP-T-T-C	0.000164502	FANCD2	ELF3 61.0 UTR	1.59216e-05	ELF3	HSP90AA1 0.0 Flank	1.4694e-07	HSP90AA1	22127137-22127137-chr8-Synonymous-SNP-A-A-G	4.85236e-05	HR
1053	MSH6 162.0 Intron	0.000129373	MSH6	100705039-100705039-chr8-Missense_Mutation-SNP-G-G-A	6.13907e-05	PABPC1	TCF7 Intron	0.000164178	TCF7	GK 1509.0 UTR	1.58884e-05	GK	122612599-122612599-chr4-3'Flank-DEL-T-T--	1.45776e-07	IL21	63537153-63537153-chr20-Synonymous-SNP-A-A-C	4.8383e-05	PTK6
1054	SETD2 Intron	0.000129158	SETD2	AFF4 Non_Silent	6.12316e-05	AFF4	42293915-42293915-chr19-Intron-SNP-T-T-G	0.000164112	CIC	100703307-100703307-chr8-3'UTR-SNP-T-T-A	1.58137e-05	PABPC1	71930902-71930902-chr16-3'Flank-SNP-C-C-T	1.41482e-07	IST1	36289171-36289171-chr1-Synonymous-SNP-T-T-G	4.81178e-05	THRAP3
1055	F2 149.0 Intron	0.000128767	F2	138567640-138567640-chr7-Missense_Mutation-SNP-C-C-A	6.12225e-05	TRIM24	1220322-1220322-chr19-Intron-SNP-T-T-C	0.000163827	STK11	207639446-207639446-chr1-3'UTR-SNP-A-A-G	1.52412e-05	CR1	190177953-190177953-chr4-3'Flank-SNP-A-A-C	1.40217e-07	DUX4	ELF4 Synonymous	4.76782e-05	ELF4
1056	74057710-74057710-chr7-Intron-SNP-A-A-C	0.000128737	ELN	CTCF Non_Silent	6.11099e-05	CTCF	RNF43 Intron	0.000163721	RNF43	PTPN6 UTR	1.51816e-05	PTPN6	TAL1 Flank	1.37062e-07	TAL1	FLT3 Synonymous	4.76451e-05	FLT3
1057	SF3B1 UTR	0.000128648	SF3B1	TH Non_Silent	6.11015e-05	TH	9940066-9940066-chr17-Intron-SNP-A-A-G	0.000163706	GAS7	MYCL 1.0 UTR	1.51227e-05	MYCL	48268327-48268327-chrX-3'Flank-SNP-T-T-G	1.36849e-07	SSX1	2080250-2080250-chr16-Synonymous-SNP-A-A-C	4.74555e-05	TSC2
1058	CR1 Non_Silent	0.000128642	CR1	KTN1 Non_Silent	6.10438e-05	KTN1	AR Intron	0.00016357	AR	HNRNPA2B1 214.0 UTR	1.48555e-05	HNRNPA2B1	ZBTB16 3823.0 Flank	1.36812e-07	ZBTB16	100006908-100006908-chr2-Synonymous-SNP-T-T-G	4.74541e-05	AFF3
1059	TERT 145.0 Intron	0.000128433	TERT	115086891-115086891-chr9-Missense_Mutation-SNP-G-G-T	6.07698e-05	TNC	THRA 484.0 Intron	0.000163284	THRA	ATR UTR	1.48495e-05	ATR	10739898-10739898-chr22-5'Flank-DEL-C-C--	1.35451e-07	U2	PLAG1 Synonymous	4.7407e-05	PLAG1
1060	PRDM1 Intron	0.000128396	PRDM1	BCL11B 119.0 Non_Silent	6.07605e-05	BCL11B	10046777-10046777-chr3-Intron-SNP-T-T-C	0.000163185	FANCD2	53486073-53486081-chr5-3'UTR-DEL-AAAAAAAAA-AAAAAAAAA--	1.48036e-05	FST	132011827-132011827-chr5-5'Flank-SNP-G-G-A	1.32022e-07	ACSL6	CRTC3 Synonymous	4.74068e-05	CRTC3
1061	157207311-157207311-chr6-Missense_Mutation-SNP-T-T-G	0.000127997	ARID1B	EXT2 Non_Silent	6.05854e-05	EXT2	FLCN Intron	0.000163069	FLCN	29945505-29945505-chr6-3'UTR-SNP-C-C-T	1.47991e-05	HLA-A	52230103-52230103-chr19-3'Flank-SNP-C-C-A	1.31029e-07	PPP2R1A	110008208-110008208-chr4-Synonymous-SNP-T-T-G	4.72751e-05	EGF
1062	SFRP4 Intron	0.00012797	SFRP4	3728751-3728751-chr16-Missense_Mutation-SNP-G-G-C	6.03975e-05	CREBBP	10064460-10064460-chr3-Intron-SNP-C-C-T	0.000162745	FANCD2	APOB UTR	1.46246e-05	APOB	32003014-32003016-chr17-3'Flank-DEL-TTT-TTT--	1.28229e-07	SUZ12	RMI2 Synonymous	4.61985e-05	RMI2
1063	DCTN1 Intron	0.000127915	DCTN1	PPM1D Non_Silent	6.02703e-05	PPM1D	EIF1AX 235.0 Intron	0.000162678	EIF1AX	29942468-29942468-chr6-5'UTR-SNP-C-C-T	1.45905e-05	HLA-A	60452728-60452729-chr2-3'Flank-INS-----C	1.27785e-07	BCL11A	MLLT3 Synonymous	4.5965e-05	MLLT3
1064	1915338-1915338-chr20-Missense_Mutation-SNP-C-C-A	0.000127864	SIRPA	TRIM33 Non_Silent	6.01259e-05	TRIM33	GNAS Intron	0.000162645	GNAS	SPEN 3.0 UTR	1.44512e-05	SPEN	STIL 0.0 Flank	1.27303e-07	STIL	AKAP9 1435.0 Synonymous	4.57406e-05	AKAP9
1065	CHD4 640.0 Non_Silent	0.000127514	CHD4	LYL1 Non_Silent	6.00023e-05	LYL1	TRIM27 Intron	0.000162278	TRIM27	TH UTR	1.43402e-05	TH	10732755-10732755-chr22-3'Flank-SNP-T-T-G	1.25597e-07	U2	DDX6 Synonymous	4.53512e-05	DDX6
1066	HLA-A 59.0 Synonymous	0.000127357	HLA-A	BCL9 1566.0 Non_Silent	5.96157e-05	BCL9	152273620-152273620-chr7-Intron-SNP-A-A-C	0.00016225	KMT2C	159099527-159099531-chr5-5'UTR-DEL-AAAAA-AAAAA--	1.42807e-05	EBF1	190179580-190179580-chr4-3'Flank-SNP-G-G-A	1.23347e-07	DUX4	ERBB4 226.0 Synonymous	4.53077e-05	ERBB4
1067	LRP1 Synonymous	0.000127244	LRP1	TCF7 Non_Silent	5.93121e-05	TCF7	TNFRSF17 Intron	0.000162061	TNFRSF17	EIF4A2 117.0 UTR	1.42715e-05	EIF4A2	153337985-153337985-chr4-3'Flank-SNP-T-T-C	1.21779e-07	TRIM2	CCNB1IP1 99.0 Synonymous	4.52382e-05	CCNB1IP1
1068	31361084-31361084-chr10-Intron-SNP-T-T-C	0.000127194	ZEB1	MUC4 837.0 Non_Silent	5.86724e-05	MUC4	13988243-13988244-chr7-Intron-DEL-CA-CA--	0.000161996	ETV1	49600324-49600324-chr17-3'UTR-SNP-C-C-G	1.41671e-05	SPOP	196045290-196045290-chr3-3'Flank-DEL-A-A--	1.20959e-07	TFRC	PML 564.0 Synonymous	4.50293e-05	PML
1069	BUB1 Intron	0.000127052	BUB1	50794348-50794348-chr16-Missense_Mutation-SNP-C-C-A	5.8255e-05	CYLD	POU5F1 Intron	0.000161924	POU5F1	33036864-33036864-chr1-5'UTR-SNP-G-G-A	1.4131e-05	AK2	65498624-65498624-chr11-3'Flank-SNP-C-C-T	1.20547e-07	MALAT1	THRA Synonymous	4.46701e-05	THRA
1070	SFRP4 Non_Silent	0.000126786	SFRP4	PTPRT 13676.0 Non_Silent	5.81659e-05	PTPRT	PTPRK 7050.0 Intron	0.000161581	PTPRK	KAT7 UTR	1.40658e-05	KAT7	MUC16 2652.0 Flank	1.20001e-07	MUC16	XPO1 Synonymous	4.4322e-05	XPO1
1071	TRIM2 2346.0 Synonymous	0.000126766	TRIM2	EWSR1 Non_Silent	5.79736e-05	EWSR1	KMT2C 2080.0 Intron	0.000160707	KMT2C	64765686-64765687-chr11-3'UTR-DEL-CA-CA--	1.38786e-05	SF1	AXIN1 1306.0 Flank	1.19613e-07	AXIN1	PRPF4 Synonymous	4.4005e-05	PRPF4
1072	15605924-15605925-chr2-Intron-DEL-TC-TC--	0.000126654	DDX1	ETV6 Non_Silent	5.79483e-05	ETV6	27650165-27650168-chr12-Intron-DEL-CTCT-CTCT--	0.000160455	PPFIBP1	TRIM3 5.0 UTR	1.38296e-05	TRIM3	MYB 758.0 Flank	1.19533e-07	MYB	236502-236502-chr5-Synonymous-SNP-G-G-T	4.39783e-05	SDHA
1073	RANBP2 639.0 Synonymous	0.000126616	RANBP2	132643513-132643514-chr12-Frame_Shift_Del-DEL-CA-CA--	5.75267e-05	POLE	CDC7 Intron	0.000160261	CDC7	RLF UTR	1.36796e-05	RLF	134177650-134177650-chr6-5'Flank-SNP-G-G-T	1.19123e-07	SGK1	NF1 2631.0 Synonymous	4.36652e-05	NF1
1074	20236998-20236999-chr17-Intron-INS-----T	0.000126301	SPECC1	39711955-39711955-chr17-Missense_Mutation-SNP-C-C-T	5.73671e-05	ERBB2	SMAD3 Intron	0.000160242	SMAD3	MLLT10 UTR	1.35232e-05	MLLT10	MDS2 266.0 Flank	1.13218e-07	MDS2	MUC4 790.0 Synonymous	4.33905e-05	MUC4
1075	AKAP9 2025.0 Non_Silent	0.000126198	AKAP9	ATP1A1 Non_Silent	5.69861e-05	ATP1A1	149181991-149181991-chr3-Intron-SNP-G-G-C	0.000159666	CP	287871-287871-chr16-3'UTR-SNP-T-T-C	1.33931e-05	AXIN1	87235221-87235222-chr10-3'Flank-INS-----C	1.12783e-07	NUTM2A	156135237-156135237-chr1-Synonymous-SNP-T-T-C	4.31433e-05	LMNA
1076	NUTM2A Intron	0.000126195	NUTM2A	28986818-28986818-chr16-Missense_Mutation-SNP-A-A-C	5.67474e-05	LAT	102572888-102572902-chr10-Intron-DEL-TCACAGCCTATTTGA-TCACAGCCTATTTGA--	0.000159181	SUFU	12943967-12943967-chr19-3'UTR-SNP-G-G-T	1.33906e-05	CALR	ZNF331 0.0 Flank	1.11931e-07	ZNF331	ITK 563.0 Synonymous	4.3067e-05	ITK
1077	RUNX1T1 Intron	0.000126174	RUNX1T1	CA1 Non_Silent	5.67266e-05	CA1	TP53 102.0 Intron	0.000158776	TP53	49665614-49665614-chr19-5'UTR-SNP-G-G-A	1.32817e-05	BCL2L12	33010749-33010749-chr1-3'Flank-SNP-C-C-T	1.10713e-07	AK2	RECQL4 125.0 Synonymous	4.26116e-05	RECQL4
1078	LCP1 Intron	0.000126033	LCP1	MAX Non_Silent	5.66564e-05	MAX	ELL 156.0 Intron	0.000158185	ELL	MLH1 1148.0 UTR	1.31981e-05	MLH1	BTK 736.0 Flank	1.10647e-07	BTK	41178473-41178473-chr22-Synonymous-SNP-T-T-G	4.25718e-05	EP300
1079	BCLAF1 378.0 Intron	0.000125733	BCLAF1	100705604-100705604-chr8-Missense_Mutation-SNP-G-G-C	5.64034e-05	PABPC1	AXIN2 Intron	0.000157693	AXIN2	95182462-95182462-chr2-3'UTR-DEL-T-T--	1.30592e-05	ZNF2	DDX6 729.0 Flank	1.0672e-07	DDX6	NUTM2B 183.0 Synonymous	4.24194e-05	NUTM2B
1080	HLA-A 33.0 Non_Silent	0.000125719	HLA-A	MAP2K2 Non_Silent	5.63394e-05	MAP2K2	FANCD2 770.0 Intron	0.000156884	FANCD2	71103284-71103284-chrX-3'UTR-DEL-G-G--	1.3059e-05	FOXO4	203706441-203706441-chr2-5'Flank-DEL-A-A--	1.06037e-07	CD28	CLTCL1 619.0 Synonymous	4.22213e-05	CLTCL1
1081	KMT2C 2265.0 Synonymous	0.000125704	KMT2C	RPL10 Non_Silent	5.6271e-05	RPL10	TNFAIP3 154.0 Intron	0.000156614	TNFAIP3	67545110-67545110-chrX-5'UTR-SNP-T-T-G	1.2816e-05	AR	ETV1 Flank	1.06017e-07	ETV1	RAP1GDS1 Synonymous	4.157e-05	RAP1GDS1
1082	1615813-1615813-chr19-Missense_Mutation-SNP-G-G-C	0.000125664	TCF3	58874571-58874571-chr12-Missense_Mutation-SNP-T-T-G	5.61331e-05	LRIG3	FLNA 267.0 Intron	0.000156558	FLNA	108201850-108201850-chr8-3'UTR-SNP-G-G-A	1.27922e-05	EIF3E	60452755-60452755-chr2-3'Flank-SNP-T-T-A	1.05424e-07	BCL11A	79712327-79712327-chr10-Synonymous-SNP-C-C-T	4.14634e-05	NUTM2B
1083	TRRAP Non_Silent	0.000125572	TRRAP	POLE 515.0 Non_Silent	5.5952e-05	POLE	MUC4 321.0 Intron	0.000156446	MUC4	KLF4 UTR	1.25262e-05	KLF4	LSM14A 1136.0 Flank	1.05154e-07	LSM14A	20316287-20316287-chr14-Synonymous-SNP-T-T-C	4.12396e-05	CCNB1IP1
1084	MAP2K2 Intron	0.000125415	MAP2K2	ACVR1 Non_Silent	5.58633e-05	ACVR1	C7 1441.0 Intron	0.000155601	C7	54295322-54295322-chr4-3'UTR-SNP-C-C-A	1.24647e-05	PDGFRA	53411655-53411656-chr12-3'Flank-DEL-TA-TA--	1.03514e-07	SP1	AK1 Synonymous	4.10995e-05	AK1
1085	FBLN2 Intron	0.000125406	FBLN2	40622267-40622267-chr15-Missense_Mutation-SNP-C-C-A	5.56508e-05	CASC5	131988790-131988790-chr5-Intron-SNP-T-T-G	0.000155029	ACSL6	FOXA1 27.0 UTR	1.23156e-05	FOXA1	65506098-65506098-chr11-5'Flank-DEL-A-A--	9.94765e-08	MALAT1	DNAJB1 45.0 Synonymous	4.09802e-05	DNAJB1
1086	TP63 4977.0 Intron	0.000125406	TP63	CHD4 252.0 Non_Silent	5.56307e-05	CHD4	PRDM2 Intron	0.00015484	PRDM2	35049034-35049034-chr21-5'UTR-SNP-T-T-C	1.21625e-05	RUNX1	149223814-149223814-chr3-5'Flank-SNP-A-A-G	9.86935e-08	CP	HNRNPA2B1 53.0 Synonymous	4.09356e-05	HNRNPA2B1
1087	WRN 1082.0 Non_Silent	0.000124809	WRN	ZNF384 24.0 Non_Silent	5.55886e-05	ZNF384	MYH11 1196.0 Intron	0.00015475	MYH11	RB1 UTR	1.21544e-05	RB1	SRC 0.0 Flank	9.86838e-08	SRC	TPM4 Synonymous	4.08852e-05	TPM4
1088	44250099-44250099-chr6-Missense_Mutation-SNP-T-T-G	0.000124653	HSP90AB1	EPS15 Non_Silent	5.55248e-05	EPS15	BCL11B Intron	0.000154349	BCL11B	142614317-142614317-chr8-5'UTR-SNP-A-A-G	1.21454e-05	ARC	10735584-10735584-chr22-3'Flank-SNP-C-C-G	9.25758e-08	U2	93252974-93252974-chr9-Synonymous-SNP-C-C-T	4.07933e-05	WNK2
1089	TP53 136.0 Non_Silent	0.000124523	TP53	CEP89 Non_Silent	5.53509e-05	CEP89	8896102-8896103-chr19-Intron-INS-----GT	0.000154322	MUC16	AK1 UTR	1.21288e-05	AK1	49619668-49619676-chr12-5'Flank-DEL-TTTTTTTTT-TTTTTTTTT--	9.23244e-08	PRPF40B	GNA11 497.0 Synonymous	4.07493e-05	GNA11
1090	152235724-152235725-chr7-Intron-DEL-TA-TA--	0.0001245	KMT2C	CHD2 787.0 Non_Silent	5.4929e-05	CHD2	ESR1 Intron	0.000154284	ESR1	20110207-20110207-chr22-3'UTR-SNP-C-C-T	1.21252e-05	DGCR8	CSF3R 271.0 Flank	9.20889e-08	CSF3R	CRLF2 Synonymous	4.03487e-05	CRLF2
1091	ZNRF3 3325.0 Non_Silent	0.000124289	ZNRF3	GAS7 Non_Silent	5.48575e-05	GAS7	46726628-46726628-chr11-Splice_Site-SNP-T-T-G	0.000153338	F2	NT5C UTR	1.21108e-05	NT5C	91940815-91940815-chr7-5'Flank-SNP-C-C-T	9.17595e-08	AKAP9	FAM131B Synonymous	4.02927e-05	FAM131B
1092	152235905-152235905-chr7-Missense_Mutation-SNP-C-C-T	0.000124171	KMT2C	CCND3 Non_Silent	5.45233e-05	CCND3	TSC2 359.0 Intron	0.000152542	TSC2	22625820-22625820-chr11-5'UTR-SNP-G-G-A	1.20265e-05	FANCF	ZBTB1 Flank	9.02894e-08	ZBTB1	32439518-32439518-chr2-Synonymous-SNP-A-A-G	4.01307e-05	BIRC6
1093	ARID1B Intron	0.000124083	ARID1B	SP6 Non_Silent	5.4227e-05	SP6	SDHA 127.0 Intron	0.000152031	SDHA	MSH6 501.0 UTR	1.19249e-05	MSH6	BCL2 0.0 Flank	8.98433e-08	BCL2	MUC1 Synonymous	4.00357e-05	MUC1
1094	AXIN1 Intron	0.000124081	AXIN1	7669659-7669659-chr17-Missense_Mutation-SNP-A-A-G	5.35037e-05	TP53	FAH 8.0 Intron	0.000151961	FAH	SI 8.0 UTR	1.176e-05	SI	15703799-15703799-chr16-3'Flank-SNP-G-G-T	8.75674e-08	MYH11	187729172-187729172-chr3-Synonymous-SNP-T-T-G	3.95331e-05	BCL6
1095	NUTM2A 71.0 Intron	0.000123988	NUTM2A	SMARCA4 1217.0 Non_Silent	5.32356e-05	SMARCA4	SETD2 1699.0 Intron	0.000150985	SETD2	CSF1R 1200.0 UTR	1.1601e-05	CSF1R	124495287-124495287-chr12-5'Flank-SNP-C-C-G	8.65931e-08	NCOR2	CCR7 Synonymous	3.94737e-05	CCR7
1096	MUC16 759.0 Synonymous	0.000123622	MUC16	MUC4 751.0 Non_Silent	5.32307e-05	MUC4	ANK1 1019.0 Intron	0.00015049	ANK1	FAM46C 376.0 UTR	1.14977e-05	FAM46C	PAFAH1B2 Flank	8.60263e-08	PAFAH1B2	IL7R Synonymous	3.93241e-05	IL7R
1097	27095695-27095697-chr7-In_Frame_Del-DEL-CGA-CGA--	0.000123578	HOXA1	NSD1 34.0 Non_Silent	5.31954e-05	NSD1	TPM3 Intron	0.00015003	TPM3	AKT2 701.0 UTR	1.14124e-05	AKT2	AKT2 Flank	8.58765e-08	AKT2	STAT3 Synonymous	3.9198e-05	STAT3
1098	CBLB Non_Silent	0.000123497	CBLB	TRAF7 299.0 Non_Silent	5.3039e-05	TRAF7	56719925-56719925-chr12-Intron-SNP-T-T-G	0.000149993	NACA	NCKIPSD UTR	1.13633e-05	NCKIPSD	31571990-31571990-chr6-5'Flank-SNP-C-C-T	8.52591e-08	TNF	TPM3 Synonymous	3.90559e-05	TPM3
1099	EZR Synonymous	0.000123372	EZR	CP Non_Silent	5.28792e-05	CP	CTNNA2 18760.0 Intron	0.000149142	CTNNA2	IK 1.0 UTR	1.13369e-05	IK	TAL2 Flank	8.47022e-08	TAL2	TH Synonymous	3.8902e-05	TH
1100	CSF1R Non_Silent	0.00012325	CSF1R	ZCCHC8 51.0 Non_Silent	5.26298e-05	ZCCHC8	TNK1 Intron	0.000148954	TNK1	HOXD1 UTR	1.12936e-05	HOXD1	10737489-10737489-chr22-5'Flank-SNP-C-C-T	8.24064e-08	U2	CXCR4 Synonymous	3.83891e-05	CXCR4
1101	IL7 590.0 Intron	0.000123085	IL7	ASPSCR1 Non_Silent	5.26087e-05	ASPSCR1	117310301-117310303-chr6-Intron-DEL-TAA-TAA--	0.000148727	ROS1	CCNB1 4.0 UTR	1.11808e-05	CCNB1	MAP2K4 0.0 Flank	8.19209e-08	MAP2K4	SUFU Synonymous	3.78685e-05	SUFU
1102	CYLD 898.0 Intron	0.000122765	CYLD	DCAF12 Non_Silent	5.24181e-05	DCAF12	ZNF331 Intron	0.000148063	ZNF331	MGA 2139.0 UTR	1.09628e-05	MGA	GPC3 Flank	8.11978e-08	GPC3	FANCA 1416.0 Synonymous	3.77758e-05	FANCA
1103	ARID2 Intron	0.000122695	ARID2	130012979-130012979-chrX-Missense_Mutation-SNP-C-C-G	5.24172e-05	BCORL1	RHO Intron	0.000147666	RHO	MALAT1 12.0 UTR	1.09532e-05	MALAT1	70520038-70520038-chr12-3'Flank-SNP-A-A-G	7.83352e-08	PTPRB	HIST1H3B Synonymous	3.77457e-05	HIST1H3B
1104	HNF1A Intron	0.000122389	HNF1A	POT1 735.0 Non_Silent	5.21093e-05	POT1	1260400-1260400-chr5-Intron-SNP-G-G-A	0.000147362	TERT	DROSHA 17.0 UTR	1.07047e-05	DROSHA	65503963-65503963-chr11-5'Flank-SNP-G-G-T	7.74731e-08	MALAT1	ALK 724.0 Synonymous	3.75415e-05	ALK
1105	NCOA2 Intron	0.00012209	NCOA2	PPFIBP1 Non_Silent	5.17418e-05	PPFIBP1	GPC3 Intron	0.000147147	GPC3	222201151-222201151-chr2-3'UTR-SNP-C-C-G	1.07018e-05	PAX3	TNFRSF14 0.0 Flank	7.6914e-08	TNFRSF14	215332470-215332470-chr2-Synonymous-SNP-T-T-C	3.75002e-05	ATIC
1106	ARC Synonymous	0.000121401	ARC	KMT2A 740.0 Non_Silent	5.15133e-05	KMT2A	CBL Intron	0.000146799	CBL	14313713-14313713-chr9-5'UTR-SNP-T-T-G	1.06846e-05	NFIB	132013185-132013185-chr5-5'Flank-SNP-A-A-G	7.68652e-08	ACSL6	DNM2 2220.0 Synonymous	3.74446e-05	DNM2
1107	PDE4DIP 2313.0 Non_Silent	0.000121389	PDE4DIP	CDK1 194.0 Non_Silent	5.14227e-05	CDK1	32499500-32499501-chr2-Intron-DEL-TC-TC--	0.000146733	BIRC6	ARID1B UTR	1.05962e-05	ARID1B	32003230-32003230-chr17-3'Flank-SNP-C-C-A	7.54126e-08	SUZ12	KAT7 Synonymous	3.70604e-05	KAT7
1108	SMAD4 Non_Silent	0.000121135	SMAD4	DDX3X Non_Silent	5.13891e-05	DDX3X	USP8 1438.0 Intron	0.000146658	USP8	RCE1 UTR	1.04673e-05	RCE1	KIAA1598 Flank	7.49322e-08	KIAA1598	HSP90AA1 104.0 Synonymous	3.60843e-05	HSP90AA1
1109	MSI2 Intron	0.000120939	MSI2	NRG1 Non_Silent	5.13376e-05	NRG1	29943667-29943667-chr6-Intron-SNP-G-G-A	0.000146502	HLA-A	RBM15 161.0 UTR	1.03735e-05	RBM15	MITF 4533.0 Flank	7.34104e-08	MITF	147618929-147618929-chr1-Synonymous-SNP-A-A-C	3.59097e-05	BCL9
1110	CLIP1 Synonymous	0.000120902	CLIP1	PHOX2B Non_Silent	5.1207e-05	PHOX2B	ETV5 Intron	0.000145586	ETV5	IST1 666.0 UTR	1.01371e-05	IST1	ZNF479 407.0 Flank	7.27603e-08	ZNF479	FANCG Synonymous	3.59041e-05	FANCG
1111	EN1 Synonymous	0.000120737	EN1	SMARCB1 Non_Silent	5.08638e-05	SMARCB1	152235791-152235791-chr7-Intron-SNP-G-G-T	0.000145519	KMT2C	PC UTR	1.011e-05	PC	64523983-64523983-chr14-3'Flank-DEL-T-T--	7.26364e-08	ZBTB1	CER1 Synonymous	3.58458e-05	CER1
1112	PBRM1 2007.0 Intron	0.00012069	PBRM1	33005339-33005339-chr7-Missense_Mutation-SNP-C-C-G	5.03038e-05	FKBP9	29943611-29943611-chr6-Intron-SNP-G-G-A	0.000145142	HLA-A	CD7 8.0 UTR	1.00375e-05	CD7	190188377-190188377-chr4-3'Flank-SNP-C-C-T	7.19344e-08	DUX4	CHST1 Synonymous	3.57805e-05	CHST1
1113	ZRSR2 Intron	0.000120517	ZRSR2	KAT6A 956.0 Non_Silent	5.00909e-05	KAT6A	8896176-8896176-chr19-Intron-SNP-A-A-C	0.000144505	MUC16	17826600-17826601-chr19-3'UTR-INS-----C	9.83565e-06	JAK3	10732864-10732864-chr22-3'Flank-SNP-A-A-T	7.14494e-08	U2	BIRC6 2214.0 Synonymous	3.54695e-05	BIRC6
1114	NUP98 1131.0 Synonymous	0.0001205	NUP98	8896018-8896018-chr19-Missense_Mutation-SNP-C-C-T	4.98732e-05	MUC16	CBLB 1571.0 Intron	0.00014439	CBLB	152135512-152135512-chr7-3'UTR-DEL-T-T--	9.78235e-06	KMT2C	ZBTB16 0.0 Flank	7.1233e-08	ZBTB16	WNK2 2102.0 Synonymous	3.53766e-05	WNK2
1115	BCL9L Synonymous	0.000120345	BCL9L	CCR4 50.0 Non_Silent	4.98573e-05	CCR4	29944059-29944059-chr6-Intron-SNP-C-C-T	0.000144327	HLA-A	8981324-8981324-chr19-5'UTR-SNP-G-G-T	9.56497e-06	MUC16	CSMD3 Flank	6.53347e-08	CSMD3	29943476-29943476-chr6-Synonymous-SNP-G-G-A	3.52931e-05	HLA-A
1116	33010803-33010803-chr1-3'Flank-SNP-T-T-G	0.000120158	AK2	41904090-41904090-chr19-Missense_Mutation-SNP-T-T-G	4.97123e-05	ARHGEF1	NF1 2388.0 Intron	0.000143681	NF1	AXIN1 11.0 UTR	9.5174e-06	AXIN1	12945743-12945743-chr19-3'Flank-SNP-G-G-A	6.35315e-08	CALR	GNAQ Synonymous	3.52524e-05	GNAQ
1117	CDH11 Non_Silent	0.000120029	CDH11	41177046-41177046-chr22-Missense_Mutation-SNP-T-T-G	4.969e-05	EP300	189880233-189880234-chr3-Intron-DEL-GT-GT--	0.000143656	TP63	95182270-95182270-chr2-3'UTR-SNP-T-T-C	9.48917e-06	ZNF2	NOTCH1 0.0 Flank	6.33235e-08	NOTCH1	TERT 817.0 Synonymous	3.51755e-05	TERT
1118	AK2 4.0 Non_Silent	0.000119897	AK2	179218294-179218294-chr3-Missense_Mutation-SNP-G-G-A	4.94158e-05	PIK3CA	EIF1 Intron	0.000143444	EIF1	MECOM 1238.0 UTR	9.46575e-06	MECOM	276733-276738-chr12-3'Flank-DEL-AAAAAA-AAAAAA--	6.29986e-08	KDM5A	NF1 3270.0 Synonymous	3.45875e-05	NF1
1119	ZNF384 Intron	0.000119606	ZNF384	FCRL4 Non_Silent	4.93561e-05	FCRL4	ARHGEF1 220.0 Intron	0.000143407	ARHGEF1	87965537-87965538-chr10-3'UTR-DEL-TT-TT--	9.44594e-06	PTEN	38378764-38378764-chr21-3'Flank-SNP-T-T-C	6.03342e-08	ERG	RGPD3 564.0 Synonymous	3.44831e-05	RGPD3
1120	PTPRT Non_Silent	0.000119605	PTPRT	127738359-127738361-chr8-In_Frame_Del-DEL-CAG-CAG--	4.895e-05	MYC	ERCC4 Intron	0.000143128	ERCC4	50476076-50476077-chr12-3'UTR-DEL-AT-AT--	9.42393e-06	LARP4	169663531-169663531-chr3-5'Flank-SNP-C-C-T	6.00808e-08	MECOM	HOXC13 Synonymous	3.44333e-05	HOXC13
1121	NCOR2 Intron	0.000119218	NCOR2	KMT2A 1352.0 Non_Silent	4.86641e-05	KMT2A	CNOT3 307.0 Intron	0.000142766	CNOT3	134053540-134053540-chr9-5'UTR-SNP-C-C-A	9.40268e-06	BRD3	36479707-36479707-chr1-5'Flank-DEL-G-G--	5.92862e-08	CSF3R	144517495-144517495-chr8-Synonymous-SNP-T-T-C	3.41601e-05	RECQL4
1122	EP300 Synonymous	0.000119084	EP300	KAT6B 2986.0 Non_Silent	4.84916e-05	KAT6B	PLCG1 Intron	0.000142008	PLCG1	ARNT 45.0 UTR	9.3443e-06	ARNT	65500823-65500824-chr11-3'Flank-INS-----TTCC	5.90742e-08	MALAT1	207563967-207563967-chr1-Synonymous-SNP-T-T-C	3.40542e-05	CR1
1123	100705009-100705009-chr8-Missense_Mutation-SNP-C-C-T	0.000118961	PABPC1	NUMA1 23.0 Non_Silent	4.84173e-05	NUMA1	MAPK1 Intron	0.000141838	MAPK1	IKZF1 1918.0 UTR	9.32898e-06	IKZF1	276943-276943-chr12-3'Flank-SNP-C-C-T	5.87266e-08	KDM5A	KAT6B 4080.0 Synonymous	3.39511e-05	KAT6B
1124	PDGFRB Intron	0.000118888	PDGFRB	108663973-108663974-chr6-Frame_Shift_Ins-INS-----G	4.84099e-05	FOXO3	80290487-80290488-chr17-Intron-DEL-GT-GT--	0.00014181	RNF213	33439908-33439908-chr3-5'UTR-SNP-G-G-C	9.16089e-06	UBP1	10734697-10734697-chr22-3'Flank-SNP-C-C-G	5.69548e-08	U2	150057568-150057568-chr5-Synonymous-SNP-A-A-C	3.39278e-05	CSF1R
1125	SMARCA4 Non_Silent	0.000118864	SMARCA4	VAV1 Non_Silent	4.84069e-05	VAV1	ABI1 Intron	0.000141518	ABI1	PSIP1 924.0 UTR	9.08824e-06	PSIP1	87235091-87235091-chr10-3'Flank-SNP-G-G-A	5.66106e-08	NUTM2A	MLLT10 Synonymous	3.39261e-05	MLLT10
1126	KMT2C 2603.0 Intron	0.000118698	KMT2C	HOOK3 Non_Silent	4.82004e-05	HOOK3	36475338-36475338-chr1-Intron-SNP-T-T-G	0.000140401	CSF3R	31375013-31375016-chr17-3'UTR-DEL-TATA-TATA--	8.9774e-06	NF1	10735264-10735264-chr22-3'Flank-SNP-C-C-T	5.64666e-08	U2	26192534-26192534-chr7-Synonymous-SNP-A-A-C	3.3881e-05	HNRNPA2B1
1127	47224248-47224249-chr1-Intron-DEL-AC-AC--	0.000118326	TAL1	BIRC3 Non_Silent	4.81306e-05	BIRC3	8896166-8896166-chr19-Intron-SNP-A-A-G	0.000140324	MUC16	BRD3 65.0 UTR	8.97479e-06	BRD3	37011675-37011675-chrX-3'Flank-SNP-C-C-A	5.62012e-08	FAM47C	AMT Synonymous	3.35799e-05	AMT
1128	ELN 599.0 Intron	0.000118205	ELN	MYCN 33.0 Non_Silent	4.80807e-05	MYCN	TAF15 Intron	0.000140205	TAF15	ID1 18.0 UTR	8.95928e-06	ID1	44873510-44873510-chrX-5'Flank-DEL-G-G--	5.45511e-08	KDM6A	NBN 623.0 Synonymous	3.33166e-05	NBN
1129	ARHGAP5 Non_Silent	0.000118124	ARHGAP5	155187287-155187287-chr1-Missense_Mutation-SNP-T-T-G	4.80189e-05	MUC1	131990830-131990831-chr5-Intron-DEL-CC-CC--	0.000139777	ACSL6	ID3 34.0 UTR	8.94477e-06	ID3	HERPUD1 0.0 Flank	5.35842e-08	HERPUD1	29943338-29943338-chr6-Synonymous-SNP-G-G-C	3.33098e-05	HLA-A
1130	PER1 Non_Silent	0.000118014	PER1	71140774-71140776-chrX-In_Frame_Del-DEL-CAG-CAG--	4.78337e-05	MED12	SKI 1492.0 Intron	0.000139745	SKI	FAT1 2442.0 UTR	8.91528e-06	FAT1	NBN 1029.0 Flank	5.26246e-08	NBN	CDKN2C 271.0 Synonymous	3.32303e-05	CDKN2C
1131	USP8 Synonymous	0.000117865	USP8	RAD51 Non_Silent	4.76003e-05	RAD51	MSH2 1364.0 Intron	0.000138373	MSH2	TERT 11.0 UTR	8.77843e-06	TERT	190179542-190179542-chr4-3'Flank-SNP-A-A-G	5.1536e-08	DUX4	71298780-71298780-chrX-Synonymous-SNP-A-A-C	3.32022e-05	NONO
1132	KIAA1549 Intron	0.000117247	KIAA1549	143207365-143207365-chr5-Missense_Mutation-SNP-G-G-C	4.74939e-05	ARHGAP26	FGFR3 201.0 Intron	0.000137988	FGFR3	TK1 UTR	8.68914e-06	TK1	52679861-52679864-chr3-5'Flank-DEL-TTTT-TTTT--	5.08621e-08	PBRM1	8980155-8980155-chr19-Synonymous-SNP-A-A-G	3.31702e-05	MUC16
1133	PDGFRB Non_Silent	0.00011724	PDGFRB	ARHGEF12 Non_Silent	4.67459e-05	ARHGEF12	BUB1B 459.0 Intron	0.000137929	BUB1B	100703271-100703272-chr8-3'UTR-DEL-TG-TG--	8.67347e-06	PABPC1	29058489-29058489-chr22-3'Flank-SNP-T-T-C	5.00012e-08	ZNRF3	PIK3CB Synonymous	3.30804e-05	PIK3CB
1134	ZNF521 Intron	0.000117232	ZNF521	FLT3 Non_Silent	4.67259e-05	FLT3	124327645-124327648-chr12-Intron-DEL-AGAC-AGAC--	0.00013772	NCOR2	100703049-100703050-chr8-3'UTR-INS-----CCTCT	8.60665e-06	PABPC1	207495998-207495998-chr1-5'Flank-SNP-G-G-A	4.96632e-08	CR1	32434752-32434752-chr11-Synonymous-SNP-G-G-A	3.28759e-05	WT1
1135	29823727-29823727-chr19-Missense_Mutation-SNP-A-A-C	0.000117186	CCNE1	6667904-6667909-chr12-In_Frame_Del-DEL-TGCTGC-TGCTGC--	4.60371e-05	ZNF384	DDX3X 277.0 Intron	0.000137538	DDX3X	WRN UTR	8.49176e-06	WRN	10737191-10737191-chr22-5'Flank-SNP-T-T-C	4.9225e-08	U2	TGFBR2 Synonymous	3.24428e-05	TGFBR2
1136	CDX2 Intron	0.000117057	CDX2	HOXA13 Non_Silent	4.57679e-05	HOXA13	CD2 Intron	0.00013718	CD2	80648490-80648490-chr2-3'UTR-DEL-T-T--	8.48587e-06	CTNNA2	MSN 0.0 Flank	4.78431e-08	MSN	PRKAR1A Synonymous	3.1949e-05	PRKAR1A
1137	MGA 2129.0 Non_Silent	0.000116778	MGA	26780673-26780673-chr1-Missense_Mutation-SNP-T-T-G	4.57283e-05	ARID1A	10786723-10786725-chr19-Intron-DEL-CCA-CCA--	0.000136477	DNM2	60553287-60553292-chr2-5'UTR-DEL-GGCGGC-GGCGGC--	8.29179e-06	BCL11A	23318737-23318737-chr22-3'Flank-SNP-C-C-T	4.6593e-08	BCR	ARHGEF1 Synonymous	3.17296e-05	ARHGEF1
1138	MUC16 1233.0 Non_Silent	0.000116592	MUC16	KAT6B 4046.0 Non_Silent	4.54739e-05	KAT6B	KMT2C 1017.0 Intron	0.000136455	KMT2C	TP63 2.0 UTR	8.27698e-06	TP63	39405460-39405462-chr17-3'Flank-DEL-TTT-TTT--	4.57648e-08	MED1	HLF Synonymous	3.15717e-05	HLF
1139	2945728-2945731-chr7-Intron-DEL-ACAC-ACAC--	0.000116165	CARD11	PREX2 4808.0 Non_Silent	4.52481e-05	PREX2	78762185-78762185-chr8-Intron-SNP-G-G-A	0.000136428	IL7	SF3B1 906.0 UTR	8.24386e-06	SF3B1	201286769-201286769-chr2-3'Flank-SNP-C-C-T	4.53277e-08	CASP8	ASPSCR1 Synonymous	3.10003e-05	ASPSCR1
1140	TSC2 656.0 Synonymous	0.000116128	TSC2	HLA-A 63.0 Non_Silent	4.51324e-05	HLA-A	10046555-10046555-chr3-Intron-SNP-G-G-A	0.00013638	FANCD2	TK1 14.0 UTR	8.2375e-06	TK1	190179666-190179666-chr4-3'Flank-SNP-C-C-A	4.47988e-08	DUX4	MUC4 783.0 Synonymous	3.05026e-05	MUC4
1141	TG Synonymous	0.000116024	TG	GOLGA5 Non_Silent	4.50702e-05	GOLGA5	FANCD2 457.0 Intron	0.000135923	FANCD2	100703330-100703330-chr8-3'UTR-SNP-A-A-C	8.16723e-06	PABPC1	PAFAH1B2 537.0 Flank	4.44047e-08	PAFAH1B2	SSX1 Synonymous	3.02713e-05	SSX1
1142	MUC16 944.0 Non_Silent	0.000115611	MUC16	195780191-195780191-chr3-Missense_Mutation-SNP-C-C-T	4.50405e-05	MUC4	CCNE1 Intron	0.0001354	CCNE1	100703048-100703049-chr8-3'UTR-DEL-AA-AA--	8.14418e-06	PABPC1	167976581-167976581-chr6-3'Flank-SNP-T-T-G	4.40236e-08	MLLT4	PCM1 Synonymous	2.99788e-05	PCM1
1143	RAF1 Intron	0.000115568	RAF1	ELF4 Non_Silent	4.4801e-05	ELF4	FH 61.0 Intron	0.000134936	FH	53486073-53486080-chr5-3'UTR-DEL-AAAAAAAA-AAAAAAAA--	8.11879e-06	FST	THRA 0.0 Flank	4.3639e-08	THRA	CBLC Synonymous	2.95758e-05	CBLC
1144	MLLT1 Intron	0.00011552	MLLT1	29942825-29942825-chr6-Missense_Mutation-SNP-G-G-A	4.47374e-05	HLA-A	ATF1 Intron	0.000134822	ATF1	42072975-42072975-chr20-3'UTR-DEL-A-A--	7.99418e-06	PTPRT	PER1 0.0 Flank	4.35609e-08	PER1	53196042-53196042-chrX-Synonymous-SNP-T-T-G	2.94559e-05	KDM5C
1145	WNK2 Intron	0.000115499	WNK2	AKT1 Non_Silent	4.47319e-05	AKT1	BLM 856.0 Intron	0.00013473	BLM	45351246-45351250-chr19-3'UTR-DEL-CCTCA-CCTCA--	7.94616e-06	ERCC2	FAH 0.0 Flank	4.32837e-08	FAH	EBP 55.0 Synonymous	2.94398e-05	EBP
1146	152265049-152265049-chr7-Nonsense_Mutation-SNP-G-G-T	0.000115364	KMT2C	PRRX1 Non_Silent	4.45107e-05	PRRX1	BCL11A Intron	0.000134373	BCL11A	PAX3 26.0 UTR	7.94087e-06	PAX3	5179215-5179216-chr17-3'Flank-DEL-CT-CT--	4.25619e-08	USP6	PPFIBP1 Synonymous	2.92252e-05	PPFIBP1
1147	MUTYH Intron	0.000115058	MUTYH	11035040-11035042-chr19-In_Frame_Del-DEL-GAG-GAG--	4.44776e-05	SMARCA4	DDX5 Intron	0.00013342	DDX5	100703167-100703167-chr8-3'UTR-SNP-A-A-G	7.91087e-06	PABPC1	190179583-190179583-chr4-3'Flank-SNP-G-G-A	4.1964e-08	DUX4	SYK 1005.0 Synonymous	2.88616e-05	SYK
1148	DNM2 1372.0 Intron	0.000114913	DNM2	PDE4D Non_Silent	4.42909e-05	PDE4D	ETV5 1186.0 Intron	0.000133398	ETV5	6688168-6688169-chr12-Splice_Region-DEL-CT-CT--	7.87757e-06	ZNF384	10740236-10740237-chr22-5'Flank-INS-----T	4.11346e-08	U2	104757545-104757545-chr12-Synonymous-SNP-T-T-C	2.78363e-05	CHST11
1149	CUL3 Intron	0.000114558	CUL3	41711185-41711187-chr15-In_Frame_Del-DEL-CAG-CAG--	4.41554e-05	MGA	CYP2C8 Intron	0.000132566	CYP2C8	F5 2.0 UTR	7.86784e-06	F5	FAH 673.0 Flank	4.01709e-08	FAH	92867100-92867100-chr11-Synonymous-SNP-G-G-A	2.76348e-05	FAT3
1150	72797459-72797461-chr16-In_Frame_Del-DEL-TTG-TTG--	0.000114433	ZFHX3	SF1 49.0 Non_Silent	4.41475e-05	SF1	MUTYH Intron	0.000132342	MUTYH	RNF213 UTR	7.85595e-06	RNF213	21967164-21967164-chr9-3'Flank-DEL-A-A--	3.97382e-08	CDKN2A	5142088-5142088-chr17-Synonymous-SNP-A-A-C	2.75713e-05	USP6
1151	APOB 96.0 Non_Silent	0.000113983	APOB	56166699-56166699-chr8-Missense_Mutation-SNP-T-T-G	4.39859e-05	PLAG1	TPR 239.0 Intron	0.000132184	TPR	FBLN2 1780.0 UTR	7.82227e-06	FBLN2	52232281-52232281-chr19-3'Flank-DEL-G-G--	3.97268e-08	PPP2R1A	PDGFRB 126.0 Synonymous	2.7569e-05	PDGFRB
1152	USP6 43.0 Intron	0.000113957	USP6	29943463-29943463-chr6-Nonsense_Mutation-SNP-T-T-A	4.38899e-05	HLA-A	MLLT4 1830.0 Intron	0.000132037	MLLT4	185100903-185100903-chr1-3'UTR-DEL-T-T--	7.78594e-06	RNF2	ATP1A1 632.0 Flank	3.94702e-08	ATP1A1	CSF1 Synonymous	2.75348e-05	CSF1
1153	CA2 Intron	0.000113784	CA2	108767711-108767711-chr2-Missense_Mutation-SNP-C-C-G	4.38558e-05	RANBP2	7467770-7467773-chr1-Intron-DEL-CTTC-CTTC--	0.00013191	CAMTA1	56163660-56163661-chr8-3'UTR-DEL-TG-TG--	7.57794e-06	PLAG1	57132420-57132420-chr7-5'Flank-SNP-C-C-T	3.93736e-08	ZNF479	RHO Synonymous	2.69456e-05	RHO
1154	ITK 1256.0 Intron	0.000113615	ITK	CEP89 1448.0 Non_Silent	4.38436e-05	CEP89	131986893-131986894-chr5-Intron-DEL-TC-TC--	0.000131727	ACSL6	EGF 8.0 UTR	7.558e-06	EGF	GAS7 Flank	3.93293e-08	GAS7	PSIP1 Synonymous	2.68005e-05	PSIP1
1155	CD209 UTR	0.00011356	CD209	TGFBR2 878.0 Non_Silent	4.3764e-05	TGFBR2	152247823-152247823-chr7-Intron-SNP-C-C-A	0.000131056	KMT2C	ACVR1 UTR	7.52912e-06	ACVR1	TP63 0.0 Flank	3.87459e-08	TP63	PDE4DIP 2782.0 Synonymous	2.66492e-05	PDE4DIP
1156	77922196-77922196-chr9-Missense_Mutation-SNP-T-T-A	0.000113525	GNAQ	33013400-33013401-chr1-Frame_Shift_Ins-INS-----ATGTC	4.36485e-05	AK2	CBLB 1919.0 Intron	0.000130175	CBLB	HOXA13 52.0 UTR	7.51802e-06	HOXA13	75784731-75784731-chr17-5'Flank-SNP-G-G-A	3.75391e-08	H3F3B	RB1 Synonymous	2.65741e-05	RB1
1157	47791155-47791156-chr2-Intron-DEL-TG-TG--	0.00011342	MSH6	29944193-29944193-chr6-Missense_Mutation-SNP-G-G-A	4.35998e-05	HLA-A	PAFAH1B2 Intron	0.000129725	PAFAH1B2	ACVR2A UTR	7.51363e-06	ACVR2A	FOXO1 Flank	3.62715e-08	FOXO1	CR1 1435.0 Synonymous	2.64186e-05	CR1
1158	47171162-47171164-chrX-In_Frame_Del-DEL-GGA-GGA--	0.00011339	RBM10	11012971-11012971-chr19-Missense_Mutation-SNP-T-T-G	4.34595e-05	SMARCA4	CREB3L2 Intron	0.000129627	CREB3L2	14083097-14083099-chr9-3'UTR-DEL-AAA-AAA--	7.22179e-06	NFIB	PIM1 Flank	3.41941e-08	PIM1	FOXL2 Synonymous	2.63803e-05	FOXL2
1159	TET1 Non_Silent	0.000113385	TET1	132642219-132642219-chr12-Missense_Mutation-SNP-G-G-T	4.31796e-05	POLE	USP6 38.0 Intron	0.000129387	USP6	IK 293.0 UTR	7.05903e-06	IK	RANBP2 1328.0 Flank	3.40111e-08	RANBP2	44951614-44951614-chr18-Synonymous-SNP-T-T-C	2.63129e-05	SETBP1
1160	FAM47C Non_Silent	0.00011315	FAM47C	21006211-21006211-chr2-Missense_Mutation-SNP-C-C-T	4.31476e-05	APOB	FBXW7 Intron	0.000128956	FBXW7	130057407-130057408-chrX-3'UTR-DEL-GA-GA--	7.02959e-06	BCORL1	NRG1 0.0 Flank	3.36806e-08	NRG1	HR 255.0 Synonymous	2.6248e-05	HR
1161	NCOR2 Non_Silent	0.000112946	NCOR2	100715488-100715488-chr8-Missense_Mutation-SNP-C-C-T	4.25033e-05	PABPC1	70216648-70216648-chr8-Intron-SNP-C-C-A	0.000128609	NCOA2	90642253-90642253-chr15-3'UTR-SNP-A-A-G	7.0097e-06	CRTC3	ZFHX3 Flank	3.32007e-08	ZFHX3	50492713-50492713-chr15-Synonymous-SNP-T-T-C	2.62105e-05	USP8
1162	COL1A1 69.0 Non_Silent	0.000112753	COL1A1	CHD2 484.0 Non_Silent	4.24994e-05	CHD2	TERT 506.0 Intron	0.00012857	TERT	RAP1GDS1 3616.0 UTR	6.95992e-06	RAP1GDS1	DCT 0.0 Flank	3.2961e-08	DCT	MYC Synonymous	2.59184e-05	MYC
1163	GNAQ Intron	0.000112707	GNAQ	33013330-33013330-chr1-Missense_Mutation-SNP-G-G-C	4.19308e-05	AK2	41347203-41347203-chrX-Intron-SNP-A-A-G	0.000128412	DDX3X	QKI 3126.0 UTR	6.94527e-06	QKI	GRM3 0.0 Flank	3.07465e-08	GRM3	CIC 141.0 Synonymous	2.5548e-05	CIC
1164	SDHC UTR	0.000112703	SDHC	ARID1A 1664.0 Non_Silent	4.17763e-05	ARID1A	CHEK2 487.0 Intron	0.00012835	CHEK2	CNOT3 UTR	6.90184e-06	CNOT3	MSN Flank	3.03191e-08	MSN	CSF1R 497.0 Synonymous	2.55203e-05	CSF1R
1165	POLE 396.0 Non_Silent	0.000112601	POLE	NONO Non_Silent	4.15251e-05	NONO	100706806-100706886-chr8-Splice_Site-DEL-CTAAAAAATAAGAACATTTTGTATTTTTATCTTGCTCTTTCAAATTGGTGATCAATTTTTAAAGGAAGGATTAAGACTCAC-CTAAAAAATAAGAACATTTTGTATTTTTATCTTGCTCTTTCAAATTGGTGATCAATTTTTAAAGGAAGGATTAAGACTCAC--	0.000128118	PABPC1	NFIB 4638.0 UTR	6.76595e-06	NFIB	10737824-10737824-chr22-5'Flank-SNP-C-C-T	2.99305e-08	U2	ROS1 1949.0 Synonymous	2.50815e-05	ROS1
1166	CBLB Intron	0.000112411	CBLB	EXT1 Non_Silent	4.14063e-05	EXT1	74988957-74988957-chr10-Intron-SNP-T-T-G	0.000127868	KAT6B	BCL3 224.0 UTR	6.72108e-06	BCL3	190179534-190179534-chr4-3'Flank-SNP-C-C-T	2.99287e-08	DUX4	CA2 267.0 Synonymous	2.50803e-05	CA2
1167	USP6 42.0 Intron	0.000112229	USP6	KMT2D 262.0 Non_Silent	4.1356e-05	KMT2D	58976313-58976314-chr5-Intron-DEL-AC-AC--	0.000127232	PDE4D	SS18L1 710.0 UTR	6.68522e-06	SS18L1	10732464-10732464-chr22-3'Flank-SNP-G-G-C	2.99191e-08	U2	SMARCB1 Synonymous	2.50783e-05	SMARCB1
1168	122328146-122328146-chr12-Missense_Mutation-SNP-G-G-T	0.000112208	CLIP1	21003025-21003025-chr2-Missense_Mutation-SNP-C-C-G	4.12361e-05	APOB	157243604-157243605-chr5-Intron-DEL-CT-CT--	0.000126762	ITK	ABI1 2287.0 UTR	6.66672e-06	ABI1	RD3 0.0 Flank	2.9788e-08	RD3	93024634-93024634-chr15-Synonymous-SNP-A-A-C	2.50251e-05	CHD2
1169	CHD7 2907.0 Intron	0.000111921	CHD7	MAP3K13 Non_Silent	4.1198e-05	MAP3K13	FBL Intron	0.000126749	FBL	CUX1 8629.0 UTR	6.6199e-06	CUX1	161378700-161378700-chr1-3'Flank-DEL-A-A--	2.96211e-08	SDHC	DDX10 Synonymous	2.49227e-05	DDX10
1170	ARNT Intron	0.000111921	ARNT	CR1 1636.0 Non_Silent	4.11214e-05	CR1	10048202-10048202-chr3-Intron-SNP-G-G-T	0.000125557	FANCD2	68299227-68299227-chr5-3'UTR-DEL-A-A--	6.61406e-06	PIK3R1	64507321-64507322-chr17-5'Flank-DEL-GA-GA--	2.9225e-08	DDX5	57126602-57126602-chr7-Synonymous-SNP-C-C-G	2.47126e-05	ZNF479
1171	JAZF1 Intron	0.000111812	JAZF1	CDKN1A 115.0 Non_Silent	4.08743e-05	CDKN1A	ZNF3 Intron	0.000125313	ZNF3	CRTC1 1875.0 UTR	6.61065e-06	CRTC1	167826573-167826573-chr6-5'Flank-SNP-C-C-A	2.91301e-08	MLLT4	NFKB2 128.0 Synonymous	2.41197e-05	NFKB2
1172	TCEA1 Intron	0.000111809	TCEA1	7673764-7673764-chr17-Missense_Mutation-SNP-C-C-T	4.0801e-05	TP53	FGFR1 464.0 Intron	0.000125304	FGFR1	CUL3 UTR	6.57342e-06	CUL3	BCL6 285.0 Flank	2.91119e-08	BCL6	10829116-10829116-chr19-Synonymous-SNP-T-T-C	2.41087e-05	DNM2
1173	DEK Non_Silent	0.00011159	DEK	ERBB4 226.0 Non_Silent	4.07225e-05	ERBB4	MUC16 557.0 Intron	0.000124932	MUC16	TCF7L2 UTR	6.55953e-06	TCF7L2	SIRPA 904.0 Flank	2.81989e-08	SIRPA	211386998-211386998-chr2-Synonymous-SNP-G-G-T	2.38817e-05	ERBB4
1174	MYH9 393.0 Non_Silent	0.00011125	MYH9	100709464-100709464-chr8-Missense_Mutation-SNP-G-G-A	4.05802e-05	PABPC1	SYK 948.0 Intron	0.000123014	SYK	KRAS 4.0 UTR	6.54223e-06	KRAS	DNM2 2276.0 Flank	2.77122e-08	DNM2	78182667-78182667-chr17-Synonymous-SNP-T-T-C	2.36519e-05	TK1
1175	106432991-106432991-chr2-Missense_Mutation-SNP-C-C-T	0.000111157	RGPD3	IKBKB Non_Silent	4.05033e-05	IKBKB	MLLT1 66.0 Intron	0.000122861	MLLT1	MDM2 5.0 UTR	6.4177e-06	MDM2	BCL2 Flank	2.73176e-08	BCL2	FAT4 3.0 Synonymous	2.35123e-05	FAT4
1176	TMPRSS2 Intron	0.00011089	TMPRSS2	F5 567.0 Non_Silent	4.04567e-05	F5	AMT 63.0 Intron	0.000122459	AMT	67066140-67066140-chr15-5'UTR-SNP-G-G-A	6.39992e-06	SMAD3	TAL1 0.0 Flank	2.72881e-08	TAL1	ABL2 186.0 Synonymous	2.34536e-05	ABL2
1177	PABPC1 126.0 Synonymous	0.000110889	PABPC1	41936044-41936044-chr6-Missense_Mutation-SNP-A-A-C	4.0383e-05	CCND3	MUC16 1119.0 Intron	0.000122349	MUC16	BCL9 1672.0 UTR	6.29677e-06	BCL9	TNFRSF17 0.0 Flank	2.71749e-08	TNFRSF17	QKI Synonymous	2.33762e-05	QKI
1178	EZR 430.0 Intron	0.000110862	EZR	38482010-38482010-chr5-Missense_Mutation-SNP-T-T-G	4.02173e-05	LIFR	CCNB1 Intron	0.000122345	CCNB1	77979080-77979081-chr1-5'UTR-INS-----GGCCG	6.20512e-06	FUBP1	10491838-10491838-chr17-3'Flank-SNP-G-G-T	2.71046e-08	MYH1	MITF 4510.0 Synonymous	2.30459e-05	MITF
1179	CREB3L1 Intron	0.000110815	CREB3L1	RPL5 Non_Silent	4.02051e-05	RPL5	PARG 2732.0 Intron	0.000122116	PARG	6402525-6402525-chr7-3'UTR-SNP-C-C-A	6.18048e-06	RAC1	ETV5 1258.0 Flank	2.69686e-08	ETV5	SYK 945.0 Synonymous	2.29955e-05	SYK
1180	6602041-6602043-chr12-In_Frame_Del-DEL-CTT-CTT--	0.000110774	CHD4	99175207-99175209-chr14-In_Frame_Del-DEL-CTC-CTC--	4.01108e-05	BCL11B	NCOR1 1774.0 Intron	0.000121262	NCOR1	XPA 9.0 UTR	6.15306e-06	XPA	AXIN2 Flank	2.68061e-08	AXIN2	100709720-100709720-chr8-Synonymous-SNP-C-C-T	2.25648e-05	PABPC1
1181	NT5C2 Synonymous	0.000110175	NT5C2	TNK1 Non_Silent	4.00687e-05	TNK1	117310316-117310316-chr6-Intron-SNP-T-T-C	0.000121236	ROS1	53973132-53973133-chr12-5'UTR-DEL-AG-AG--	6.11442e-06	HOXC11	32437536-32437536-chr11-5'Flank-SNP-G-G-A	2.66548e-08	WT1	138151949-138151949-chr8-Synonymous-SNP-G-G-A	2.23927e-05	FAM135B
1182	NUP98 Synonymous	0.000110166	NUP98	LARP4B Non_Silent	4.00391e-05	LARP4B	256235-256235-chr5-Intron-SNP-A-A-G	0.000121124	SDHA	63929073-63929073-chr17-3'UTR-SNP-G-G-C	6.05841e-06	CD79B	161379236-161379236-chr1-3'Flank-SNP-T-T-C	2.56063e-08	SDHC	19210386-19210386-chr22-Synonymous-SNP-T-T-C	2.2382e-05	CLTCL1
1183	8896143-8896143-chr19-Intron-SNP-G-G-A	0.000109773	MUC16	TCP1 Non_Silent	3.9652e-05	TCP1	86785464-86785464-chr4-Intron-SNP-T-T-C	0.000120778	PTPN13	CDH17 UTR	6.0443e-06	CDH17	121546667-121546667-chr3-5'Flank-SNP-C-C-A	2.43637e-08	POLQ	ARID2 2443.0 Synonymous	2.22264e-05	ARID2
1184	175146935-175146935-chr1-Missense_Mutation-SNP-T-T-G	0.000109641	TNN	ZNF331 Non_Silent	3.96509e-05	ZNF331	ALK 594.0 Intron	0.000120386	ALK	53380245-53380245-chr12-5'UTR-SNP-A-A-C	5.92775e-06	SP1	FAT4 3532.0 Flank	2.38889e-08	FAT4	109969024-109969024-chr4-Synonymous-SNP-T-T-G	2.21932e-05	EGF
1185	FANCD2 426.0 Intron	0.000109602	FANCD2	RGPD3 559.0 Non_Silent	3.96091e-05	RGPD3	ABL1 217.0 Intron	0.000119814	ABL1	POLQ 2290.0 UTR	5.9145e-06	POLQ	190179547-190179547-chr4-3'Flank-SNP-A-A-T	2.38868e-08	DUX4	147619694-147619694-chr1-Synonymous-SNP-A-A-C	2.21137e-05	BCL9
1186	MUC16 2133.0 Non_Silent	0.000109417	MUC16	57178583-57178583-chr12-Missense_Mutation-SNP-A-A-C	3.95475e-05	LRP1	56920031-56920034-chr15-Intron-DEL-TTTG-TTTG--	0.0001194	TCF12	78174654-78174654-chr17-3'UTR-SNP-C-C-T	5.90602e-06	TK1	224585651-224585651-chr2-5'Flank-SNP-G-G-C	2.36174e-08	CUL3	BCL2 Synonymous	2.2078e-05	BCL2
1187	ATIC Intron	0.000109342	ATIC	NOTCH1 148.0 Non_Silent	3.9501e-05	NOTCH1	FIBP Intron	0.000119142	FIBP	CCNC 524.0 UTR	5.85275e-06	CCNC	190179516-190179516-chr4-3'Flank-SNP-C-C-T	2.34201e-08	DUX4	FAS Synonymous	2.19311e-05	FAS
1188	HLA-A 45.0 Non_Silent	0.000108989	HLA-A	KMT2D 437.0 Non_Silent	3.91103e-05	KMT2D	131986957-131986958-chr5-Intron-DEL-AC-AC--	0.000119123	ACSL6	AXIN1 1193.0 UTR	5.7728e-06	AXIN1	MLLT1 0.0 Flank	2.31314e-08	MLLT1	31409145-31409145-chr5-Synonymous-SNP-A-A-G	2.18661e-05	DROSHA
1189	FANCD2 761.0 Intron	0.000108729	FANCD2	SMARCD1 106.0 Non_Silent	3.90229e-05	SMARCD1	99562778-99562778-chr6-Intron-DEL-C-C--	0.000118559	CCNC	179229518-179229518-chr1-5'UTR-SNP-T-T-C	5.67986e-06	ABL2	GNAQ 0.0 Flank	2.29393e-08	GNAQ	CD2 Synonymous	2.17782e-05	CD2
1190	MALAT1 0.0 Flank	0.000108656	MALAT1	NPM1 251.0 Non_Silent	3.88627e-05	NPM1	GLI1 Intron	0.000117739	GLI1	MLLT6 417.0 UTR	5.676e-06	MLLT6	CNBD1 10330.0 Flank	2.27087e-08	CNBD1	FEV Synonymous	2.16862e-05	FEV
1191	TBL1XR1 Intron	0.000108583	TBL1XR1	152273773-152273773-chr7-Missense_Mutation-SNP-C-C-T	3.88348e-05	KMT2C	MPL Intron	0.000117389	MPL	KTN1 UTR	5.66418e-06	KTN1	60553560-60553560-chr2-5'Flank-SNP-G-G-A	2.25703e-08	BCL11A	140800382-140800382-chr7-Synonymous-SNP-T-T-G	2.16653e-05	BRAF
1192	122328152-122328152-chr12-Missense_Mutation-SNP-A-A-C	0.000108543	CLIP1	TF Non_Silent	3.87594e-05	TF	NCKIPSD Intron	0.000117079	NCKIPSD	ARC 66.0 UTR	5.61453e-06	ARC	EPHA3 Flank	2.2487e-08	EPHA3	176093094-176093094-chr2-Synonymous-SNP-G-G-A	2.15762e-05	HOXD13
1193	PER1 Synonymous	0.000108454	PER1	ARID1A 734.0 Non_Silent	3.87514e-05	ARID1A	AKT2 153.0 Intron	0.000116554	AKT2	91940884-91940886-chr7-5'UTR-DEL-GGC-GGC--	5.57208e-06	AKAP9	10735121-10735121-chr22-3'Flank-SNP-C-C-T	2.24432e-08	U2	MAML2 2313.0 Synonymous	2.14975e-05	MAML2
1194	RAF1 511.0 Intron	0.000108394	RAF1	ECT2L Non_Silent	3.86811e-05	ECT2L	CIC 186.0 Intron	0.000115752	CIC	36282430-36282430-chr22-3'UTR-SNP-C-C-A	5.55847e-06	MYH9	NFE2L2 698.0 Flank	2.24062e-08	NFE2L2	AXIN2 110.0 Synonymous	2.14776e-05	AXIN2
1195	PLCG1 Intron	0.000108348	PLCG1	CANT1 Non_Silent	3.86426e-05	CANT1	RMI2 Intron	0.000115595	RMI2	TRIM3 6.0 UTR	5.55507e-06	TRIM3	MAP2K2 Flank	2.20821e-08	MAP2K2	SEPT5 Synonymous	2.14728e-05	SEPT5
1196	132896601-132896603-chr9-In_Frame_Del-DEL-GCT-GCT--	0.000108283	TSC1	134171128-134171128-chr6-Missense_Mutation-SNP-G-G-T	3.85695e-05	SGK1	PRKCB 6895.0 Intron	0.000115578	PRKCB	KLF6 68.0 UTR	5.54932e-06	KLF6	PC 1189.0 Flank	2.20173e-08	PC	CREB3L2 Synonymous	2.10759e-05	CREB3L2
1197	161673277-161673277-chr1-Intron-SNP-C-C-T	0.000108228	FCGR2B	45069832-45069832-chrX-Missense_Mutation-SNP-C-C-A	3.84348e-05	KDM6A	77684989-77684992-chr11-Intron-DEL-AAAT-AAAT--	0.000114995	RSF1	44253750-44253750-chr6-3'UTR-SNP-T-T-C	5.54277e-06	HSP90AB1	207052080-207052080-chr1-5'Flank-SNP-G-G-T	2.18228e-08	YOD1	45851774-45851774-chr12-Synonymous-SNP-T-T-C	2.09968e-05	ARID2
1198	WWTR1 Non_Silent	0.000108143	WWTR1	GPC3 Non_Silent	3.82549e-05	GPC3	10048157-10048157-chr3-Intron-SNP-C-C-A	0.000114967	FANCD2	77499315-77499315-chr17-3'UTR-SNP-T-T-C	5.52809e-06	SEPT9	CSF3R 0.0 Flank	2.18056e-08	CSF3R	TLX3 Synonymous	2.09182e-05	TLX3
1199	TAF15 Non_Silent	0.000108049	TAF15	JUN 34.0 Non_Silent	3.79118e-05	JUN	BCL11B 141.0 Intron	0.000114836	BCL11B	117627845-117627848-chr1-3'UTR-DEL-TGTG-TGTG--	5.46994e-06	FAM46C	MYB 0.0 Flank	2.12045e-08	MYB	COA1 Synonymous	2.08976e-05	COA1
1200	XPC Intron	0.000108038	XPC	ARHGEF1 191.0 Non_Silent	3.75656e-05	ARHGEF1	2055347-2055347-chr16-Intron-SNP-T-T-G	0.000114777	TSC2	BCL10 205.0 UTR	5.41321e-06	BCL10	56900777-56900777-chr5-3'Flank-SNP-G-G-A	2.0057e-08	MAP3K1	TBP Synonymous	2.08878e-05	TBP
1201	87228974-87228974-chr10-Intron-SNP-C-C-G	0.000107921	NUTM2A	PPP2R1A Non_Silent	3.75535e-05	PPP2R1A	YWHAE Intron	0.000114734	YWHAE	MUC16 2.0 UTR	5.23352e-06	MUC16	APC 0.0 Flank	1.98928e-08	APC	NUTM2A 63.0 Synonymous	2.08708e-05	NUTM2A
1202	ACSL3 Intron	0.00010724	ACSL3	ECT2 Non_Silent	3.70934e-05	ECT2	114398011-114398014-chr1-Intron-DEL-AAAA-AAAA--	0.00011416	TRIM33	TNN 1586.0 UTR	5.22613e-06	TNN	C3 0.0 Flank	1.96484e-08	C3	131150398-131150398-chr9-Synonymous-SNP-A-A-G	2.07646e-05	NUP214
1203	122328162-122328162-chr12-Missense_Mutation-SNP-C-C-T	0.000107126	CLIP1	87228805-87228805-chr10-Missense_Mutation-SNP-G-G-A	3.70507e-05	NUTM2A	SRC Intron	0.000113486	SRC	CSF1 3.0 UTR	5.2252e-06	CSF1	207645149-207645149-chr1-3'Flank-SNP-G-G-T	1.93828e-08	CR1	CNTRL 1329.0 Synonymous	2.07334e-05	CNTRL
1204	PDGFB 351.0 Intron	0.000106902	PDGFB	127973144-127973144-chr6-Missense_Mutation-SNP-G-G-C	3.70265e-05	PTPRK	ARHGAP26 7537.0 Intron	0.000113052	ARHGAP26	CD79B 72.0 UTR	5.08493e-06	CD79B	MYB Flank	1.89015e-08	MYB	92097613-92097613-chr7-Synonymous-SNP-A-A-C	2.06982e-05	AKAP9
1205	MECOM 637.0 Synonymous	0.000106655	MECOM	207575361-207575361-chr2-Missense_Mutation-SNP-G-G-C	3.69539e-05	CREB1	5130305-5130305-chr17-Intron-SNP-G-G-A	0.000112692	USP6	RET 1027.0 UTR	5.04638e-06	RET	FGFR4 Flank	1.85918e-08	FGFR4	40073573-40073573-chrX-Synonymous-SNP-T-T-G	2.06047e-05	BCOR
1206	POLQ Non_Silent	0.000106392	POLQ	LPP 7679.0 Non_Silent	3.66791e-05	LPP	IST1 Intron	0.000112636	IST1	PPP2R1A 721.0 UTR	5.01388e-06	PPP2R1A	102423179-102423179-chr10-5'Flank-SNP-T-T-A	1.83303e-08	PSD	HLA-A 43.0 Synonymous	2.04386e-05	HLA-A
1207	NDRG1 Non_Silent	0.000106018	NDRG1	BTK Non_Silent	3.65993e-05	BTK	55152710-55152710-chr7-Intron-SNP-A-A-C	0.000112609	EGFR	JAZF1 7002.0 UTR	4.99004e-06	JAZF1	43352867-43352867-chr1-3'Flank-SNP-C-C-A	1.82734e-08	MPL	130067417-130067417-chrX-Synonymous-SNP-A-A-G	2.04305e-05	ELF4
1208	EXT2 Intron	0.000106017	EXT2	PER1 120.0 Non_Silent	3.63429e-05	PER1	CUL3 Intron	0.000112473	CUL3	222201320-222201320-chr2-3'UTR-DEL-T-T--	4.96987e-06	PAX3	65506098-65506099-chr11-5'Flank-DEL-AA-AA--	1.82405e-08	MALAT1	150078115-150078115-chr5-Synonymous-SNP-G-G-A	2.03334e-05	CSF1R
1209	EGF 1909.0 Intron	0.000105901	EGF	SRGAP3 1596.0 Non_Silent	3.62837e-05	SRGAP3	132908424-132908430-chr8-Intron-DEL-ACAGAGG-ACAGAGG--	0.000112433	TG	NPM1 5.0 UTR	4.84286e-06	NPM1	CHD4 748.0 Flank	1.81666e-08	CHD4	31258415-31258415-chr17-Synonymous-SNP-T-T-C	2.02743e-05	NF1
1210	HOXC11 Intron	0.000105892	HOXC11	ERBB3 265.0 Non_Silent	3.62366e-05	ERBB3	SYK 700.0 Intron	0.000112192	SYK	58974631-58974633-chr5-3'UTR-DEL-AAA-AAA--	4.75411e-06	PDE4D	RSPO3 1575.0 Flank	1.80845e-08	RSPO3	45079318-45079318-chrX-Synonymous-SNP-G-G-A	2.00995e-05	KDM6A
1211	77492700-77492700-chr17-Missense_Mutation-SNP-T-T-G	0.000105749	SEPT9	195784909-195784909-chr3-Missense_Mutation-SNP-G-G-A	3.6201e-05	MUC4	ZNF429 Intron	0.00011148	ZNF429	NPM1 4.0 UTR	4.70734e-06	NPM1	NFATC2 0.0 Flank	1.80251e-08	NFATC2	TCP1 Synonymous	1.92183e-05	TCP1
1212	29944059-29944059-chr6-Intron-SNP-C-C-T	0.000105423	HLA-A	SETBP1 5412.0 Non_Silent	3.61537e-05	SETBP1	KMT2C 2781.0 Intron	0.000111042	KMT2C	151068000-151068000-chr1-3'UTR-DEL-T-T--	4.70235e-06	MLLT11	CCND2 633.0 Flank	1.77332e-08	CCND2	ETV1 Synonymous	1.90804e-05	ETV1
1213	RECQL4 Non_Silent	0.000105375	RECQL4	RCE1 Non_Silent	3.60638e-05	RCE1	STAT5B 359.0 Intron	0.000111037	STAT5B	53486100-53486100-chr5-3'UTR-SNP-G-G-A	4.65365e-06	FST	SYK Flank	1.77185e-08	SYK	SDC4 Synonymous	1.89821e-05	SDC4
1214	7673537-7673537-chr17-Nonsense_Mutation-SNP-G-G-A	0.000105035	TP53	MLF1 636.0 Non_Silent	3.57175e-05	MLF1	ELF4 Intron	0.000110864	ELF4	ZNF429 4.0 UTR	4.56936e-06	ZNF429	ZFHX3 5311.0 Flank	1.75298e-08	ZFHX3	TMPRSS2 179.0 Synonymous	1.8951e-05	TMPRSS2
1215	6952191-6952191-chr12-Intron-SNP-A-A-C	0.000104919	PTPN6	157207311-157207311-chr6-Missense_Mutation-SNP-T-T-G	3.56831e-05	ARID1B	SH3GL1 Intron	0.000110765	SH3GL1	10141318-10141318-chr3-5'UTR-SNP-G-G-C	4.52293e-06	VHL	CD74 0.0 Flank	1.7226e-08	CD74	CHD2 2487.0 Synonymous	1.8925e-05	CHD2
1216	KEAP1 Non_Silent	0.000104854	KEAP1	46382061-46382061-chr2-Missense_Mutation-SNP-C-C-A	3.5429e-05	EPAS1	CD209 Intron	0.00011027	CD209	HNF1A 5.0 UTR	4.51751e-06	HNF1A	113215773-113215773-chr2-3'Flank-SNP-G-G-A	1.66943e-08	PAX8	DROSHA 173.0 Synonymous	1.88518e-05	DROSHA
1217	TSHR 3767.0 Non_Silent	0.000104823	TSHR	FES Non_Silent	3.53696e-05	FES	TH Intron	0.000110246	TH	PTPRB UTR	4.41814e-06	PTPRB	CLTCL1 Flank	1.62452e-08	CLTCL1	179108597-179108597-chr1-Synonymous-SNP-A-A-C	1.85622e-05	ABL2
1218	KMT2C 2020.0 Non_Silent	0.000104571	KMT2C	GATA2 Non_Silent	3.53442e-05	GATA2	8896143-8896143-chr19-Intron-SNP-G-G-C	0.000110154	MUC16	BCL2L1 29.0 UTR	4.35652e-06	BCL2L1	106404182-106404182-chr2-3'Flank-SNP-T-T-C	1.61034e-08	RGPD3	NUP98 1391.0 Synonymous	1.85526e-05	NUP98
1219	138153221-138153222-chr8-Splice_Region-DEL-AA-AA--	0.00010433	FAM135B	MLLT3 Non_Silent	3.52102e-05	MLLT3	CD27 Intron	0.000109952	CD27	CDC73 4.0 UTR	4.35156e-06	CDC73	SRGAP3 Flank	1.59659e-08	SRGAP3	PDE4DIP 2308.0 Synonymous	1.84346e-05	PDE4DIP
1220	TSC2 Synonymous	0.000104277	TSC2	8908929-8908930-chr19-In_Frame_Ins-INS-----TGG	3.482e-05	MUC16	BCR 1868.0 Intron	0.000109929	BCR	CSF1R 15.0 UTR	4.2734e-06	CSF1R	190177982-190177982-chr4-3'Flank-SNP-G-G-A	1.54255e-08	DUX4	OXR1 5887.0 Synonymous	1.81033e-05	OXR1
1221	MUT Intron	0.000104252	MUT	LRP1B 4523.0 Non_Silent	3.46842e-05	LRP1B	TNFAIP3 Intron	0.000109556	TNFAIP3	CER1 UTR	4.23979e-06	CER1	11964975-11964975-chr16-5'Flank-SNP-T-T-A	1.53754e-08	TNFRSF17	MUC4 834.0 Synonymous	1.80014e-05	MUC4
1222	36923307-36923308-chr9-Intron-DEL-TC-TC--	0.00010398	PAX5	ALB Non_Silent	3.4582e-05	ALB	WAS Intron	0.000109299	WAS	CDH10 10.0 UTR	4.12252e-06	CDH10	190177934-190177934-chr4-3'Flank-SNP-C-C-A	1.50487e-08	DUX4	36287193-36287193-chr1-Synonymous-SNP-A-A-C	1.77241e-05	THRAP3
1223	162780066-162780067-chr1-Intron-DEL-TC-TC--	0.000103973	DDR2	HIF1A Non_Silent	3.44513e-05	HIF1A	29268467-29268467-chr22-Intron-SNP-A-A-C	0.000109046	EWSR1	CD28 2.0 UTR	4.12066e-06	CD28	29189257-29189257-chr2-3'Flank-SNP-A-A-G	1.49262e-08	ALK	CCND2 Synonymous	1.75496e-05	CCND2
1224	RNF213 Synonymous	0.000103848	RNF213	RBM10 525.0 Non_Silent	3.40793e-05	RBM10	24032681-24032683-chr2-Intron-DEL-AAT-AAT--	0.000109007	C2orf44	FANCF 67.0 UTR	4.11243e-06	FANCF	56211301-56211303-chr8-5'Flank-DEL-GCC-GCC--	1.48129e-08	PLAG1	CCR4 Synonymous	1.75481e-05	CCR4
1225	92883319-92883319-chr11-Missense_Mutation-SNP-A-A-C	0.000103757	FAT3	HLA-A 46.0 Non_Silent	3.40377e-05	HLA-A	100712808-100712808-chr8-Intron-SNP-G-G-A	0.000108876	PABPC1	ETV1 1895.0 UTR	4.09934e-06	ETV1	HOXD1 Flank	1.46525e-08	HOXD1	TNF Synonymous	1.74208e-05	TNF
1226	HLA-A 32.0 Non_Silent	0.000103711	HLA-A	RAP1GDS1 Non_Silent	3.39835e-05	RAP1GDS1	DCC 8245.0 Intron	0.000107697	DCC	40687055-40687055-chr20-3'UTR-SNP-T-T-G	4.05507e-06	MAFB	ZNF331 Flank	1.45486e-08	ZNF331	ETV4 99.0 Synonymous	1.72705e-05	ETV4
1227	CREBBP 912.0 Non_Silent	0.000103545	CREBBP	FUBP1 Non_Silent	3.38413e-05	FUBP1	152235724-152235725-chr7-Intron-DEL-TA-TA--	0.000107587	KMT2C	150115690-150115690-chr5-3'UTR-SNP-T-T-C	4.04448e-06	PDGFRB	190179602-190179602-chr4-3'Flank-SNP-A-A-T	1.32928e-08	DUX4	49027194-49027194-chr12-Synonymous-SNP-A-A-G	1.7251e-05	KMT2D
1228	MSH2 Non_Silent	0.000103344	MSH2	RHOA 188.0 Non_Silent	3.37394e-05	RHOA	RNF2 Intron	0.000107571	RNF2	46739445-46739445-chr11-3'UTR-SNP-C-C-A	4.03117e-06	F2	71103926-71103928-chrX-3'Flank-DEL-AGA-AGA--	1.32001e-08	FOXO4	LCP1 Synonymous	1.70763e-05	LCP1
1229	LCK Non_Silent	0.000103329	LCK	92042078-92042079-chr7-Frame_Shift_Del-DEL-AG-AG--	3.3671e-05	AKAP9	142558556-142558557-chr3-Intron-INS-----G	0.000107435	ATR	ANK1 50.0 UTR	4.02699e-06	ANK1	NACA 297.0 Flank	1.31476e-08	NACA	195788433-195788433-chr3-Synonymous-SNP-T-T-A	1.6982e-05	MUC4
1230	BCL9 Non_Silent	0.000103241	BCL9	PDE4DIP 2309.0 Non_Silent	3.35346e-05	PDE4DIP	FANCD2 943.0 Intron	0.000106424	FANCD2	APC 2147.0 UTR	4.01279e-06	APC	TAL2 0.0 Flank	1.3125e-08	TAL2	MAFB Synonymous	1.6839e-05	MAFB
1231	SRGAP3 1448.0 Intron	0.00010324	SRGAP3	68645403-68645403-chr10-Missense_Mutation-SNP-G-G-T	3.34902e-05	TET1	32394470-32394470-chr13-Intron-SNP-A-A-G	0.000106357	BRCA2	193122190-193122190-chr1-5'UTR-DEL-G-G--	3.99832e-06	CDC73	ASXL1 1621.0 Flank	1.30851e-08	ASXL1	100706669-100706669-chr8-Synonymous-SNP-T-T-C	1.67882e-05	PABPC1
1232	PABPC1 196.0 Non_Silent	0.000103129	PABPC1	LRP1 1142.0 Non_Silent	3.34855e-05	LRP1	198722350-198722351-chr1-Intron-DEL-AT-AT--	0.000106324	PTPRC	PDGFB 48.0 UTR	3.96912e-06	PDGFB	SND1 0.0 Flank	1.29122e-08	SND1	ERBB3 294.0 Synonymous	1.67831e-05	ERBB3
1233	FANCD2 436.0 Intron	0.000103126	FANCD2	ZFHX3 3517.0 Non_Silent	3.30942e-05	ZFHX3	18747130-18747130-chr19-Intron-DEL-C-C--	0.000106167	CRTC1	CNBP UTR	3.93035e-06	CNBP	PF4 0.0 Flank	1.28683e-08	PF4	48523873-48523873-chrX-Synonymous-SNP-C-C-G	1.66049e-05	EBP
1234	TOP1 Intron	0.000102895	TOP1	87134568-87134568-chr4-Missense_Mutation-SNP-G-G-C	3.29465e-05	AFF1	NR4A3 Intron	0.000106115	NR4A3	43639398-43639398-chr7-3'UTR-SNP-T-T-C	3.87133e-06	COA1	OXR1 6067.0 Flank	1.28032e-08	OXR1	26751707-26751707-chr10-Synonymous-SNP-T-T-G	1.65171e-05	ABI1
1235	EPAS1 Non_Silent	0.000102714	EPAS1	SH2B3 Non_Silent	3.27992e-05	SH2B3	C3 7.0 Intron	0.000105774	C3	117799568-117799569-chr8-3'UTR-DEL-TT-TT--	3.8516e-06	EXT1	KEAP1 Flank	1.27603e-08	KEAP1	ANK1 1220.0 Synonymous	1.64241e-05	ANK1
1236	MUC4 503.0 Intron	0.000102669	MUC4	BUB1B Non_Silent	3.26362e-05	BUB1B	PAX7 1437.0 Intron	0.000105406	PAX7	CTNNB1 UTR	3.85102e-06	CTNNB1	ERCC5 625.0 Flank	1.26536e-08	ERCC5	ELK4 Synonymous	1.64193e-05	ELK4
1237	130055979-130055979-chrX-Missense_Mutation-SNP-T-T-G	0.000102613	BCORL1	AKAP9 2851.0 Non_Silent	3.25461e-05	AKAP9	5130447-5130447-chr17-Splice_Region-SNP-T-T-G	0.000105294	USP6	ZNF384 UTR	3.72756e-06	ZNF384	ERG Flank	1.25092e-08	ERG	132659414-132659414-chr12-Synonymous-SNP-C-C-T	1.63563e-05	POLE
1238	SSX1 Intron	0.000102477	SSX1	7673803-7673803-chr17-Missense_Mutation-SNP-G-G-A	3.23648e-05	TP53	CSMD3 1328.0 Intron	0.000105066	CSMD3	77498698-77498698-chr17-3'UTR-SNP-A-A-T	3.7236e-06	SEPT9	RIN2 2320.0 Flank	1.23677e-08	RIN2	SFRP4 124.0 Synonymous	1.62603e-05	SFRP4
1239	SI Non_Silent	0.000102248	SI	ALK 2561.0 Non_Silent	3.2225e-05	ALK	ZNF2 Intron	0.000105051	ZNF2	PPP6C 60.0 UTR	3.67509e-06	PPP6C	10735398-10735398-chr22-3'Flank-SNP-T-T-C	1.23658e-08	U2	ELF4 50.0 Synonymous	1.62571e-05	ELF4
1240	IDH2 Intron	0.000102238	IDH2	150068243-150068245-chr5-In_Frame_Del-DEL-AGC-AGC--	3.21149e-05	CSF1R	32937517-32937517-chr19-Intron-SNP-G-G-T	0.00010502	CEP89	NUTM1 2.0 UTR	3.67021e-06	NUTM1	90647597-90647597-chr15-3'Flank-SNP-C-C-G	1.23601e-08	CRTC3	149004934-149004934-chr1-Synonymous-SNP-G-G-A	1.62309e-05	PDE4DIP
1241	CRTC3 Non_Silent	0.000102121	CRTC3	SP1 Non_Silent	3.19187e-05	SP1	BUB1 227.0 Intron	0.000104518	BUB1	STAT3 48.0 UTR	3.66851e-06	STAT3	190177919-190177919-chr4-3'Flank-SNP-A-A-T	1.20758e-08	DUX4	EGF 1123.0 Synonymous	1.62057e-05	EGF
1242	256509-256509-chr5-3'UTR-SNP-G-G-A	0.000102013	SDHA	ARHGAP26 Non_Silent	3.17434e-05	ARHGAP26	XPA Intron	0.000104241	XPA	29945691-29945691-chr6-3'UTR-SNP-G-G-A	3.64358e-06	HLA-A	SMAD4 Flank	1.16639e-08	SMAD4	53735452-53735452-chr3-Synonymous-SNP-C-C-T	1.61202e-05	CACNA1D
1243	MLLT3 Intron	0.000101992	MLLT3	MAML2 62.0 Non_Silent	3.16296e-05	MAML2	PBX1 5213.0 Intron	0.000103713	PBX1	58974631-58974631-chr5-3'UTR-DEL-A-A--	3.61407e-06	PDE4D	WWTR1 3722.0 Flank	1.14772e-08	WWTR1	MN1 1014.0 Synonymous	1.60716e-05	MN1
1244	TRAF7 Non_Silent	0.000101979	TRAF7	AKT1 128.0 Non_Silent	3.14685e-05	AKT1	FCRL4 450.0 Intron	0.000103623	FCRL4	DCTN1 5.0 UTR	3.61057e-06	DCTN1	10740461-10740461-chr22-5'Flank-SNP-A-A-G	1.14272e-08	U2	ERBB3 427.0 Synonymous	1.58664e-05	ERBB3
1245	60856479-60856481-chr8-In_Frame_Del-DEL-GGA-GGA--	0.000101924	CHD7	JUN 45.0 Non_Silent	3.14518e-05	JUN	CHEK2 31.0 Intron	0.000103598	CHEK2	GAS7 66.0 UTR	3.60726e-06	GAS7	117171539-117171540-chr11-3'Flank-DEL-AA-AA--	1.13019e-08	PAFAH1B2	NFKBIE Synonymous	1.57929e-05	NFKBIE
1246	UBR5 Non_Silent	0.000101812	UBR5	54627454-54627454-chr8-Missense_Mutation-SNP-C-C-A	3.14444e-05	RP1	MB Intron	0.000103385	MB	EIF1 3.0 UTR	3.5994e-06	EIF1	TFEB 0.0 Flank	1.13014e-08	TFEB	31181757-31181757-chr17-Synonymous-SNP-G-G-A	1.57465e-05	NF1
1247	ATR Non_Silent	0.000101479	ATR	NUTM2B Non_Silent	3.14247e-05	NUTM2B	HNRNPA2B1 Intron	0.000103251	HNRNPA2B1	154398397-154398397-chrX-5'UTR-SNP-G-G-A	3.54075e-06	RPL10	190179716-190179716-chr4-3'Flank-SNP-C-C-A	1.11976e-08	DUX4	49030563-49030563-chrX-Synonymous-SNP-T-T-C	1.57356e-05	TFE3
1248	25666102-25666105-chr4-Intron-DEL-TTTG-TTTG--	0.000101291	SLC34A2	TFRC Non_Silent	3.13776e-05	TFRC	WIF1 Intron	0.000103139	WIF1	ABL1 7.0 UTR	3.5126e-06	ABL1	CDK6 Flank	1.11465e-08	CDK6	42292633-42292633-chr19-Synonymous-SNP-G-G-C	1.57262e-05	CIC
1249	C3 639.0 Intron	0.000101014	C3	CD27 Non_Silent	3.10149e-05	CD27	BIRC3 Intron	0.000102514	BIRC3	56932099-56932099-chr16-5'UTR-SNP-G-G-A	3.48478e-06	HERPUD1	OXR1 Flank	1.11077e-08	OXR1	NRAS Synonymous	1.5649e-05	NRAS
1250	LRIG3 Intron	0.000100862	LRIG3	PRDM2 1536.0 Non_Silent	3.09646e-05	PRDM2	HLA-A 49.0 Intron	0.000101566	HLA-A	23559582-23559582-chr1-5'UTR-SNP-T-T-C	3.46605e-06	ID3	DCT Flank	1.09986e-08	DCT	53410624-53410624-chr18-Synonymous-SNP-T-T-C	1.56409e-05	DCC
1251	PAX8 Intron	0.000100841	PAX8	HOXC13 129.0 Non_Silent	3.07777e-05	HOXC13	HMGA2 Intron	0.00010147	HMGA2	CUX1 UTR	3.44335e-06	CUX1	ARID2 Flank	1.09825e-08	ARID2	RPN1 Synonymous	1.49466e-05	RPN1
1252	KMT2C 2079.0 Non_Silent	0.000100702	KMT2C	108723079-108723079-chr11-Missense_Mutation-SNP-C-C-A	3.07106e-05	DDX10	C2orf44 67.0 Intron	0.000101265	C2orf44	ETV6 4829.0 UTR	3.44095e-06	ETV6	FOXO3 Flank	1.04119e-08	FOXO3	AK2 474.0 Synonymous	1.49326e-05	AK2
1253	50492819-50492819-chr15-Missense_Mutation-SNP-A-A-G	0.000100697	USP8	71140739-71140741-chrX-In_Frame_Del-DEL-AGC-AGC--	3.0708e-05	MED12	50842075-50842076-chr10-Intron-DEL-AC-AC--	0.000101249	A1CF	SEPT9 4360.0 UTR	3.43177e-06	SEPT9	190179571-190179571-chr4-3'Flank-SNP-T-T-G	1.03825e-08	DUX4	BCOR 447.0 Synonymous	1.47583e-05	BCOR
1254	152273884-152273884-chr7-Intron-SNP-A-A-C	0.000100589	KMT2C	ACVR2A 1633.0 Non_Silent	3.06195e-05	ACVR2A	92837512-92837514-chr14-Intron-DEL-TTG-TTG--	0.00010111	GOLGA5	RHO 103.0 UTR	3.37857e-06	RHO	TET2 Flank	1.00546e-08	TET2	SDHD Synonymous	1.47535e-05	SDHD
1255	PDE4DIP Synonymous	0.000100213	PDE4DIP	PABPC1 205.0 Non_Silent	3.04325e-05	PABPC1	CCR7 Intron	0.000100941	CCR7	KLF6 182.0 UTR	3.37292e-06	KLF6	95031835-95031835-chr10-3'Flank-SNP-A-A-G	9.78907e-09	CYP2C8	72004022-72004022-chr11-Synonymous-SNP-T-T-C	1.46764e-05	NUMA1
1256	AFF1 2552.0 Non_Silent	0.000100102	AFF1	8896019-8896019-chr19-Missense_Mutation-SNP-C-C-G	3.01404e-05	MUC16	77599585-77599588-chrX-Splice_Region-DEL-AAAC-AAAC--	0.000100767	ATRX	TNFRSF14 140.0 UTR	3.34873e-06	TNFRSF14	PC Flank	9.64039e-09	PC	CACNA1D 4816.0 Synonymous	1.46676e-05	CACNA1D
1257	ZNF2 Intron	0.000100083	ZNF2	26696960-26696962-chr1-In_Frame_Del-DEL-GCG-GCG--	3.01272e-05	ARID1A	10046849-10046852-chr3-Intron-DEL-AATC-AATC--	0.000100216	FANCD2	158766846-158766847-chr6-3'UTR-DEL-AC-AC--	3.34549e-06	EZR	ANK1 0.0 Flank	9.56725e-09	ANK1	BARD1 1104.0 Synonymous	1.46448e-05	BARD1
1258	EML4 Intron	9.99243e-05	EML4	TP53 118.0 Non_Silent	3.00405e-05	TP53	152367218-152367218-chr7-Intron-SNP-A-A-T	9.9468e-05	KMT2C	COA1 4.0 UTR	3.32273e-06	COA1	167826517-167826517-chr6-5'Flank-SNP-C-C-A	9.16414e-09	MLLT4	75030623-75030623-chr10-Synonymous-SNP-A-A-C	1.46168e-05	KAT6B
1259	BAP1 Non_Silent	9.96791e-05	BAP1	NAB2 56.0 Non_Silent	2.99338e-05	NAB2	8896129-8896129-chr19-Intron-SNP-T-T-C	9.92982e-05	MUC16	LPP 12983.0 UTR	3.32186e-06	LPP	FH 445.0 Flank	9.10993e-09	FH	CA1 Synonymous	1.45838e-05	CA1
1260	SPEN 1674.0 Non_Silent	9.96359e-05	SPEN	RCC2 Non_Silent	2.96765e-05	RCC2	FANCE Intron	9.92781e-05	FANCE	PDC UTR	3.31488e-06	PDC	PDGFB 429.0 Flank	9.08925e-09	PDGFB	ARAF Synonymous	1.41558e-05	ARAF
1261	ASPSCR1 Non_Silent	9.95977e-05	ASPSCR1	FIBP Non_Silent	2.95989e-05	FIBP	CHD2 972.0 Intron	9.91562e-05	CHD2	COL3A1 751.0 UTR	3.31369e-06	COL3A1	A1CF 1727.0 Flank	9.05297e-09	A1CF	TRIM33 Synonymous	1.41102e-05	TRIM33
1262	PRDM2 1476.0 Non_Silent	9.94854e-05	PRDM2	8896086-8896087-chr19-Frame_Shift_Del-DEL-GG-GG--	2.95396e-05	MUC16	108078389-108078391-chr4-Splice_Region-DEL-GGT-GGT--	9.84535e-05	LEF1	8985094-8985095-chr3-3'UTR-DEL-AT-AT--	3.29053e-06	SRGAP3	NUP214 Flank	8.85265e-09	NUP214	29050623-29050623-chr22-Synonymous-SNP-A-A-C	1.407e-05	ZNRF3
1263	33013277-33013277-chr1-Synonymous-SNP-G-G-A	9.94662e-05	AK2	114713908-114713908-chr1-Missense_Mutation-SNP-T-T-C	2.94853e-05	NRAS	ANK1 165.0 Intron	9.8284e-05	ANK1	MB UTR	3.2872e-06	MB	SMAD4 0.0 Flank	8.6858e-09	SMAD4	FBLN2 1771.0 Synonymous	1.38677e-05	FBLN2
1264	NUP98 91.0 Intron	9.93805e-05	NUP98	CCNC Non_Silent	2.93529e-05	CCNC	77410723-77410723-chr3-Intron-SNP-C-C-A	9.7937e-05	ROBO2	79598050-79598050-chr16-3'UTR-DEL-A-A--	3.24006e-06	MAF	CDH11 0.0 Flank	8.62962e-09	CDH11	HOXA13 Synonymous	1.38156e-05	HOXA13
1265	58891707-58891709-chr20-5'UTR-DEL-CCG-CCG--	9.9253e-05	GNAS	SMARCD1 Non_Silent	2.9312e-05	SMARCD1	45076680-45076682-chrX-Intron-DEL-TTT-TTT--	9.77758e-05	KDM6A	13823349-13823349-chr1-3'UTR-SNP-T-T-A	3.20521e-06	PRDM2	MUC4 0.0 Flank	8.54004e-09	MUC4	TCF12 Synonymous	1.3724e-05	TCF12
1266	KDM5A Non_Silent	9.91834e-05	KDM5A	49034264-49034264-chr12-Missense_Mutation-SNP-A-A-C	2.87267e-05	KMT2D	RPL22 Intron	9.76623e-05	RPL22	68833553-68833553-chr16-3'UTR-SNP-C-C-T	3.16781e-06	CDH1	190177962-190177962-chr4-3'Flank-SNP-A-A-T	8.48749e-09	DUX4	PBX1 Synonymous	1.35424e-05	PBX1
1267	PTPN11 Non_Silent	9.90551e-05	PTPN11	39530724-39530724-chr17-Missense_Mutation-SNP-A-A-C	2.8679e-05	CDK12	TCF7L2 3818.0 Intron	9.74543e-05	TCF7L2	159099527-159099529-chr5-5'UTR-DEL-AAA-AAA--	3.16272e-06	EBF1	DCTN1 386.0 Flank	8.44247e-09	DCTN1	35824139-35824139-chr17-Synonymous-SNP-A-A-G	1.35349e-05	TAF15
1268	41236628-41236628-chr3-Missense_Mutation-SNP-C-C-A	9.90449e-05	CTNNB1	RAD51B Non_Silent	2.86701e-05	RAD51B	MYH9 105.0 Intron	9.71995e-05	MYH9	TNF 2.0 UTR	3.1412e-06	TNF	50180924-50180924-chr17-3'Flank-DEL-A-A--	8.13386e-09	COL1A1	48685974-48685974-chrX-Synonymous-SNP-A-A-C	1.34027e-05	WAS
1269	LIFR 141.0 Non_Silent	9.90437e-05	LIFR	CS Non_Silent	2.86662e-05	CS	FANCD2 944.0 Intron	9.67788e-05	FANCD2	PAX3 33.0 UTR	3.13132e-06	PAX3	167976439-167976439-chr6-3'Flank-SNP-T-T-C	7.92562e-09	MLLT4	140501813-140501813-chr2-Synonymous-SNP-A-A-C	1.32331e-05	LRP1B
1270	JAK3 Intron	9.89841e-05	JAK3	AK1 Non_Silent	2.83775e-05	AK1	AK3 Intron	9.67434e-05	AK3	KMT2C 38.0 UTR	3.10842e-06	KMT2C	CDKN2A 0.0 Flank	7.67189e-09	CDKN2A	100713180-100713180-chr8-Splice_Region-SNP-C-C-G	1.31923e-05	PABPC1
1271	KRAS 719.0 Non_Silent	9.86848e-05	KRAS	EP300 1556.0 Non_Silent	2.8347e-05	EP300	SFPQ Intron	9.62682e-05	SFPQ	GPC3 6.0 UTR	3.09793e-06	GPC3	23627154-23627155-chr1-5'Flank-INS-----C	7.2284e-09	MDS2	33036742-33036742-chr1-Synonymous-SNP-C-C-G	1.30856e-05	AK2
1272	10048222-10048222-chr3-Intron-SNP-C-C-A	9.86156e-05	FANCD2	MUC4 835.0 Non_Silent	2.83019e-05	MUC4	66853402-66853402-chr11-Intron-SNP-T-T-G	9.59422e-05	PC	SMC1A 971.0 UTR	3.01563e-06	SMC1A	AFF1 Flank	7.15079e-09	AFF1	DDIT3 Synonymous	1.30853e-05	DDIT3
1273	AKT2 Intron	9.84261e-05	AKT2	CDKN2A 68.0 Non_Silent	2.82468e-05	CDKN2A	152185650-152185650-chr7-Intron-SNP-G-G-A	9.58542e-05	KMT2C	HOXA11 4.0 UTR	3.01411e-06	HOXA11	190177988-190177988-chr4-3'Flank-SNP-A-A-C	6.84026e-09	DUX4	8144851-8144851-chr17-Synonymous-SNP-T-T-C	1.29622e-05	PER1
1274	TMEM127 111.0 Non_Silent	9.84166e-05	TMEM127	KDM6A 3927.0 Non_Silent	2.81204e-05	KDM6A	15798640-15798640-chr16-Intron-SNP-G-G-A	9.52214e-05	MYH11	TGFBR2 1709.0 UTR	3.00112e-06	TGFBR2	190177963-190177963-chr4-3'Flank-SNP-C-C-A	6.80647e-09	DUX4	CACNA1D 3438.0 Synonymous	1.29351e-05	CACNA1D
1275	180620740-180620741-chr5-Intron-DEL-GT-GT--	9.8352e-05	FLT4	64767031-64767033-chr11-In_Frame_Del-DEL-GGC-GGC--	2.80619e-05	SF1	209696357-209696359-chr2-Splice_Region-DEL-ATT-ATT--	9.49238e-05	MAP2	SF1 14.0 UTR	2.9817e-06	SF1	10739564-10739564-chr22-5'Flank-SNP-T-T-A	6.77881e-09	U2	CTNNA2 4453.0 Synonymous	1.28392e-05	CTNNA2
1276	NRAS Intron	9.83271e-05	NRAS	CCDC6 84.0 Non_Silent	2.79968e-05	CCDC6	C3 639.0 Intron	9.46048e-05	C3	FAM46C 365.0 UTR	2.96484e-06	FAM46C	MLLT1 Flank	6.65867e-09	MLLT1	MYOD1 Synonymous	1.27101e-05	MYOD1
1277	DEK 800.0 Non_Silent	9.83224e-05	DEK	MUC4 796.0 Non_Silent	2.78113e-05	MUC4	148979731-148979731-chr1-Splice_Region-SNP-A-A-T	9.44316e-05	PDE4DIP	14719969-14719969-chr9-3'UTR-SNP-A-A-G	2.96157e-06	CER1	COL1A1 Flank	6.62431e-09	COL1A1	BLM 1539.0 Synonymous	1.25884e-05	BLM
1278	ERG Intron	9.82362e-05	ERG	136519469-136519469-chr9-Missense_Mutation-SNP-T-T-G	2.77888e-05	NOTCH1	3118850-3118850-chr19-Intron-SNP-T-T-G	9.43213e-05	GNA11	ZNRF3 3428.0 UTR	2.9472e-06	ZNRF3	PF4 Flank	6.59972e-09	PF4	CDKN2C Synonymous	1.25824e-05	CDKN2C
1279	STAT3 Intron	9.79502e-05	STAT3	HOXD13 Non_Silent	2.77022e-05	HOXD13	ACSL6 324.0 Intron	9.42145e-05	ACSL6	CREB1 UTR	2.94279e-06	CREB1	EIF3E 0.0 Flank	6.54132e-09	EIF3E	ETV5 Synonymous	1.25456e-05	ETV5
1280	ARHGEF1 Non_Silent	9.77536e-05	ARHGEF1	29942954-29942954-chr6-Missense_Mutation-SNP-G-G-C	2.74042e-05	HLA-A	9052989-9052989-chr3-Intron-SNP-G-G-T	9.41908e-05	SRGAP3	FBL 238.0 UTR	2.93377e-06	FBL	MAP2 Flank	6.44373e-09	MAP2	GOLGA5 Synonymous	1.22558e-05	GOLGA5
1281	CARD11 414.0 Intron	9.76377e-05	CARD11	TNFAIP3 Non_Silent	2.73568e-05	TNFAIP3	10064580-10064580-chr3-Intron-SNP-C-C-T	9.37186e-05	FANCD2	PIM1 5.0 UTR	2.91093e-06	PIM1	RSPO3 Flank	6.14013e-09	RSPO3	WNK2 1361.0 Synonymous	1.22214e-05	WNK2
1282	LSM14A Non_Silent	9.75038e-05	LSM14A	ZFHX3 98.0 Non_Silent	2.73561e-05	ZFHX3	NCOR1 1597.0 Intron	9.35622e-05	NCOR1	26200608-26200608-chr7-5'UTR-SNP-C-C-A	2.8889e-06	HNRNPA2B1	RBM15 0.0 Flank	5.83593e-09	RBM15	CARD11 14.0 Synonymous	1.20145e-05	CARD11
1283	BLM Intron	9.74927e-05	BLM	8910485-8910485-chr19-Missense_Mutation-SNP-C-C-T	2.73552e-05	MUC16	AXIN1 542.0 Intron	9.33362e-05	AXIN1	MYO5A UTR	2.88489e-06	MYO5A	190179547-190179547-chr4-3'Flank-SNP-A-A-G	5.78465e-09	DUX4	SH3GL1 69.0 Synonymous	1.18029e-05	SH3GL1
1284	CDC73 UTR	9.69116e-05	CDC73	8910504-8910504-chr19-Missense_Mutation-SNP-C-C-T	2.71827e-05	MUC16	50416571-50416571-chr19-Intron-SNP-A-A-G	9.32297e-05	POLD1	129533772-129533772-chr3-3'UTR-SNP-T-T-C	2.86583e-06	RHO	COL3A1 770.0 Flank	5.74319e-09	COL3A1	40016890-40016890-chr17-Synonymous-SNP-G-G-A	1.17967e-05	CSF3
1285	HSP90AA1 Intron	9.68672e-05	HSP90AA1	SFPQ Non_Silent	2.71402e-05	SFPQ	118502304-118502305-chr11-Intron-DEL-AT-AT--	9.31155e-05	KMT2A	85276474-85276474-chr1-5'UTR-SNP-G-G-C	2.85383e-06	BCL10	10740260-10740260-chr22-5'Flank-SNP-A-A-T	5.74049e-09	U2	124340170-124340170-chr12-Synonymous-SNP-A-A-C	1.1609e-05	NCOR2
1286	TERT 839.0 Flank	9.68022e-05	TERT	UBP1 Non_Silent	2.70647e-05	UBP1	42212247-42212247-chr17-Intron-SNP-C-C-A	9.30291e-05	STAT5B	ERBB4 23257.0 UTR	2.83228e-06	ERBB4	23318753-23318756-chr22-3'Flank-DEL-GCTG-GCTG--	5.6605e-09	BCR	56101207-56101207-chr12-Synonymous-SNP-G-G-A	1.15835e-05	ERBB3
1287	KDM6A 4328.0 Non_Silent	9.60921e-05	KDM6A	24706675-24706675-chr2-Missense_Mutation-SNP-G-G-C	2.69928e-05	NCOA1	86268595-86268602-chr11-Intron-DEL-GTGTGTGT-GTGTGTGT--	9.29473e-05	EED	RMI2 109.0 UTR	2.82288e-06	RMI2	10733676-10733676-chr22-3'Flank-SNP-C-C-A	5.64842e-09	U2	FBL Synonymous	1.12802e-05	FBL
1288	WRN 2331.0 Intron	9.59131e-05	WRN	HOXC11 Non_Silent	2.6909e-05	HOXC11	TG 1991.0 Intron	9.28068e-05	TG	KIAA1598 UTR	2.77707e-06	KIAA1598	155195268-155195268-chr1-5'Flank-SNP-G-G-C	5.5852e-09	MUC1	PDGFRB 436.0 Synonymous	1.11563e-05	PDGFRB
1289	WT1 Intron	9.58088e-05	WT1	CSF1 Non_Silent	2.6891e-05	CSF1	FANCD2 437.0 Intron	9.22625e-05	FANCD2	NUTM2A 191.0 UTR	2.76532e-06	NUTM2A	190179730-190179730-chr4-3'Flank-SNP-G-G-A	5.45443e-09	DUX4	49457961-49457961-chr6-Synonymous-SNP-T-T-C	1.11301e-05	MUT
1290	MGA 1016.0 Non_Silent	9.53983e-05	MGA	57211957-57211959-chr12-In_Frame_Del-DEL-TGC-TGC--	2.68642e-05	LRP1	FOXP1 4875.0 Intron	9.17899e-05	FOXP1	407622-407622-chr6-3'UTR-SNP-C-C-T	2.74686e-06	IRF4	10741200-10741200-chr22-5'Flank-SNP-G-G-T	5.43593e-09	U2	125487431-125487431-chr4-Synonymous-SNP-C-C-T	1.1017e-05	FAT4
1291	10043940-10043940-chr3-Intron-SNP-G-G-T	9.52998e-05	FANCD2	CR1 1826.0 Non_Silent	2.68142e-05	CR1	BRCA1 1196.0 Intron	9.16784e-05	BRCA1	92417563-92417564-chr9-5'UTR-DEL-TT-TT--	2.73157e-06	OMD	EN1 Flank	5.36377e-09	EN1	157208925-157208925-chr5-Synonymous-SNP-C-C-A	1.09945e-05	ITK
1292	EP300 1706.0 Non_Silent	9.51803e-05	EP300	29942951-29942951-chr6-Frame_Shift_Del-DEL-A-A--	2.6804e-05	HLA-A	92058037-92058037-chr7-Intron-SNP-A-A-G	9.14275e-05	AKAP9	MAP2K4 UTR	2.72939e-06	MAP2K4	10732496-10732496-chr22-3'Flank-SNP-G-G-A	5.3559e-09	U2	NUMA1 24.0 Synonymous	1.0861e-05	NUMA1
1293	OMD Non_Silent	9.49698e-05	OMD	USP8 1320.0 Non_Silent	2.67454e-05	USP8	CUX1 1975.0 Intron	9.07341e-05	CUX1	SBDS UTR	2.72587e-06	SBDS	KEAP1 0.0 Flank	5.34228e-09	KEAP1	NSD1 3207.0 Synonymous	1.0685e-05	NSD1
1294	RALGDS Intron	9.48181e-05	RALGDS	ETV4 98.0 Non_Silent	2.65487e-05	ETV4	RCC2 97.0 Intron	9.06284e-05	RCC2	STK11 UTR	2.72366e-06	STK11	171386889-171386889-chr5-5'Flank-DEL-A-A--	5.33276e-09	NPM1	ACVR1 Synonymous	1.06159e-05	ACVR1
1295	KMT2C 1049.0 Non_Silent	9.47398e-05	KMT2C	ZNF521 3306.0 Non_Silent	2.63487e-05	ZNF521	CARD11 800.0 Intron	9.05798e-05	CARD11	TSC1 97.0 UTR	2.71588e-06	TSC1	EPHA7 3592.0 Flank	5.17699e-09	EPHA7	3119241-3119241-chr19-Synonymous-SNP-C-C-T	1.06044e-05	GNA11
1296	THRAP3 Intron	9.46568e-05	THRAP3	100715573-100715573-chr8-Missense_Mutation-SNP-C-C-T	2.62523e-05	PABPC1	HERPUD1 Intron	9.05498e-05	HERPUD1	RUNX1 37.0 UTR	2.71501e-06	RUNX1	RD3 Flank	5.16764e-09	RD3	RANBP2 637.0 Synonymous	1.05928e-05	RANBP2
1297	MLLT6 Intron	9.4654e-05	MLLT6	60788112-60788112-chr10-Missense_Mutation-SNP-T-T-G	2.62408e-05	CDK1	71424112-71424113-chrX-Intron-DEL-TG-TG--	9.02268e-05	TAF1	PABPC1 9.0 UTR	2.68466e-06	PABPC1	190177918-190177918-chr4-3'Flank-SNP-C-C-A	4.88819e-09	DUX4	58782321-58782321-chr1-Synonymous-SNP-C-C-T	1.04718e-05	JUN
1298	29944116-29944116-chr6-Splice_Region-SNP-C-C-T	9.44976e-05	HLA-A	53945201-53945201-chr12-Missense_Mutation-SNP-T-T-G	2.61219e-05	HOXC13	NUTM2B Intron	9.02226e-05	NUTM2B	SDHC 1069.0 UTR	2.66778e-06	SDHC	176099646-176099646-chr2-3'Flank-DEL-G-G--	4.73022e-09	HOXD13	HOXC11 Synonymous	1.03962e-05	HOXC11
1299	ZFHX3 Intron	9.44461e-05	ZFHX3	41746102-41746104-chr4-In_Frame_Del-DEL-CCG-CCG--	2.60456e-05	PHOX2B	FAS Intron	8.98947e-05	FAS	157010357-157010357-chr7-5'UTR-SNP-G-G-C	2.66201e-06	MNX1	TRIM2 2699.0 Flank	4.67831e-09	TRIM2	RDM1 Synonymous	1.02923e-05	RDM1
1300	10063981-10063981-chr3-Intron-SNP-C-C-G	9.44025e-05	FANCD2	TSC1 420.0 Non_Silent	2.60324e-05	TSC1	XPA 151.0 Intron	8.96486e-05	XPA	1611374-1611374-chr19-3'UTR-DEL-A-A--	2.65954e-06	TCF3	64523983-64523986-chr14-3'Flank-DEL-TTTT-TTTT--	4.65469e-09	ZBTB1	29943530-29943530-chr6-Synonymous-SNP-G-G-A	1.02283e-05	HLA-A
1301	BRIP1 Intron	9.42933e-05	BRIP1	ZNF19 Non_Silent	2.56861e-05	ZNF19	136736576-136736576-chr3-Intron-SNP-G-G-T	8.955e-05	STAG1	SGK1 113.0 UTR	2.65156e-06	SGK1	ATF1 Flank	4.60427e-09	ATF1	ATIC 414.0 Synonymous	1.02205e-05	ATIC
1302	AMER1 155.0 Synonymous	9.42639e-05	AMER1	PAX3 Non_Silent	2.55787e-05	PAX3	140444464-140444465-chr2-Intron-DEL-GA-GA--	8.93204e-05	LRP1B	MUC4 3.0 UTR	2.64627e-06	MUC4	IL7R Flank	4.58662e-09	IL7R	3744549-3744549-chr11-Synonymous-SNP-C-C-G	1.01255e-05	NUP98
1303	CSF3R 186.0 Intron	9.42433e-05	CSF3R	8851321-8851321-chr19-Missense_Mutation-SNP-C-C-A	2.55723e-05	MUC16	PC 98.0 Intron	8.90747e-05	PC	70959191-70959191-chr3-3'UTR-DEL-T-T--	2.59334e-06	FOXP1	190177635-190177635-chr4-3'Flank-SNP-C-C-T	4.47612e-09	DUX4	108733267-108733267-chrX-Synonymous-SNP-T-T-G	9.97695e-06	IRS4
1304	CDKN2A Non_Silent	9.42034e-05	CDKN2A	SET Non_Silent	2.55537e-05	SET	CLTC 494.0 Intron	8.90226e-05	CLTC	CHIC2 4.0 UTR	2.59279e-06	CHIC2	190177968-190177968-chr4-3'Flank-SNP-G-G-T	4.41408e-09	DUX4	MUC16 945.0 Synonymous	9.94208e-06	MUC16
1305	FLNA Synonymous	9.41857e-05	FLNA	DCT 641.0 Non_Silent	2.55106e-05	DCT	186105591-186105591-chr3-Intron-SNP-G-G-A	8.89061e-05	ETV5	TSC1 96.0 UTR	2.55946e-06	TSC1	APC Flank	4.40597e-09	APC	TNN 352.0 Synonymous	9.79642e-06	TNN
1306	CBFA2T3 Intron	9.41838e-05	CBFA2T3	5549463-5549463-chr9-Missense_Mutation-SNP-A-A-C	2.53329e-05	PDCD1LG2	MAP2K4 Intron	8.87022e-05	MAP2K4	NF1 5602.0 UTR	2.5333e-06	NF1	TRIM2 3666.0 Flank	4.39313e-09	TRIM2	65534052-65534052-chr17-Synonymous-SNP-A-A-C	9.6986e-06	AXIN2
1307	100704992-100704992-chr8-Missense_Mutation-SNP-C-C-T	9.40819e-05	PABPC1	132897254-132897254-chr9-Missense_Mutation-SNP-A-A-C	2.53107e-05	TSC1	133132070-133132070-chr8-Intron-SNP-A-A-C	8.8162e-05	TG	TLX1 129.0 UTR	2.53195e-06	TLX1	CCNB1IP1 440.0 Flank	4.32865e-09	CCNB1IP1	NCOA1 3472.0 Synonymous	9.63699e-06	NCOA1
1308	FANCE Intron	9.38454e-05	FANCE	148811681-148811681-chr7-Missense_Mutation-SNP-T-T-C	2.51917e-05	EZH2	8914106-8914106-chr19-Intron-SNP-C-C-G	8.81366e-05	MUC16	114683384-114683384-chr12-5'UTR-SNP-G-G-A	2.51624e-06	TBX3	RAD51B 15525.0 Flank	4.31161e-09	RAD51B	PDE4DIP 2631.0 Synonymous	9.52656e-06	PDE4DIP
1309	BCL2L12 Intron	9.37799e-05	BCL2L12	MAP2K1 Non_Silent	2.51379e-05	MAP2K1	PRPF40B Intron	8.80822e-05	PRPF40B	38725620-38725620-chr17-3'UTR-DEL-C-C--	2.50817e-06	MLLT6	CDKN2A Flank	4.26597e-09	CDKN2A	WNK2 1540.0 Synonymous	9.39518e-06	WNK2
1310	BIRC6 3503.0 Intron	9.37464e-05	BIRC6	MYB Non_Silent	2.50247e-05	MYB	BMP5 111.0 Intron	8.74943e-05	BMP5	TNF 41.0 UTR	2.4632e-06	TNF	190179604-190179604-chr4-3'Flank-SNP-A-A-T	4.0687e-09	DUX4	108751298-108751298-chr2-Synonymous-SNP-C-C-T	9.38164e-06	RANBP2
1311	NT5C2 Non_Silent	9.37246e-05	NT5C2	MUC16 2292.0 Non_Silent	2.48582e-05	MUC16	C3 658.0 Intron	8.74162e-05	C3	TG 5358.0 UTR	2.45402e-06	TG	RIN2 Flank	3.99809e-09	RIN2	ZCCHC8 Synonymous	9.31742e-06	ZCCHC8
1312	55759144-55759144-chr6-Intron-SNP-C-C-A	9.34212e-05	BMP5	TP53 47.0 Non_Silent	2.45914e-05	TP53	APOB 790.0 Intron	8.69633e-05	APOB	AFF1 271.0 UTR	2.44654e-06	AFF1	GNAQ Flank	3.81741e-09	GNAQ	32435148-32435148-chr11-Synonymous-SNP-C-C-A	9.24827e-06	WT1
1313	KMT2C 2606.0 Intron	9.33183e-05	KMT2C	BCL10 Non_Silent	2.45464e-05	BCL10	FANCD2 752.0 Intron	8.66639e-05	FANCD2	LSM14A 2.0 UTR	2.41873e-06	LSM14A	190177937-190177937-chr4-3'Flank-SNP-A-A-G	3.71275e-09	DUX4	58874572-58874572-chr12-Splice_Region-SNP-C-C-G	9.15802e-06	LRIG3
1314	EP300 Intron	9.32449e-05	EP300	47171187-47171189-chrX-In_Frame_Del-DEL-GAG-GAG--	2.44957e-05	RBM10	FANCD2 428.0 Intron	8.66385e-05	FANCD2	SET 222.0 UTR	2.41148e-06	SET	MALT1 1663.0 Flank	3.6773e-09	MALT1	IDH2 Synonymous	8.65878e-06	IDH2
1315	TMEM127 Non_Silent	9.32296e-05	TMEM127	132677392-132677392-chr12-Missense_Mutation-SNP-T-T-G	2.44767e-05	POLE	CDC6 Intron	8.63873e-05	CDC6	CSF1R 665.0 UTR	2.40686e-06	CSF1R	BCL9 1698.0 Flank	3.53267e-09	BCL9	207567900-207567900-chr1-Synonymous-SNP-A-A-G	8.63179e-06	CR1
1316	CBLC Intron	9.31344e-05	CBLC	MLF1 Non_Silent	2.43459e-05	MLF1	TRAF7 363.0 Intron	8.62507e-05	TRAF7	9716285-9716285-chrX-3'UTR-SNP-A-A-C	2.3985e-06	TBL1X	GRM3 Flank	3.44616e-09	GRM3	KLK2 Synonymous	8.49579e-06	KLK2
1317	TFPT Intron	9.31157e-05	TFPT	PMS2 Non_Silent	2.42233e-05	PMS2	CD79B Intron	8.56275e-05	CD79B	31401397-31401397-chr5-3'UTR-SNP-G-G-T	2.35741e-06	DROSHA	APOB 854.0 Flank	3.3808e-09	APOB	MUC4 746.0 Synonymous	8.41062e-06	MUC4
1318	CRNKL1 Non_Silent	9.29501e-05	CRNKL1	7663438-7663438-chr1-Nonsense_Mutation-SNP-C-C-G	2.42185e-05	CAMTA1	VTI1A Intron	8.53439e-05	VTI1A	13638159-13638159-chr3-3'UTR-SNP-T-T-G	2.3324e-06	FBLN2	60452524-60452524-chr2-3'Flank-SNP-C-C-T	3.36364e-09	BCL11A	HOOK3 Synonymous	8.40966e-06	HOOK3
1319	ETV4 Intron	9.29115e-05	ETV4	PCBP1 Non_Silent	2.42135e-05	PCBP1	SP1 Intron	8.52192e-05	SP1	COA1 5.0 UTR	2.31978e-06	COA1	REL 1003.0 Flank	3.34286e-09	REL	CBFB Synonymous	8.38831e-06	CBFB
1320	IK Non_Silent	9.25022e-05	IK	186048734-186048734-chr3-Missense_Mutation-SNP-T-T-G	2.3988e-05	ETV5	LRP1 648.0 Intron	8.47872e-05	LRP1	193122189-193122190-chr1-5'UTR-INS-----G	2.30005e-06	CDC73	KRAS Flank	3.31315e-09	KRAS	108253955-108253955-chr11-Synonymous-SNP-C-C-T	8.24651e-06	ATM
1321	BIRC3 Non_Silent	9.24837e-05	BIRC3	100706704-100706704-chr8-Missense_Mutation-SNP-C-C-G	2.38795e-05	PABPC1	63532451-63532451-chr20-Intron-DEL-G-G--	8.44024e-05	PTK6	177098028-177098028-chr5-3'UTR-SNP-G-G-C	2.29851e-06	FGFR4	MED12 Flank	3.19569e-09	MED12	AXIN2 182.0 Synonymous	8.19889e-06	AXIN2
1322	MET Non_Silent	9.24835e-05	MET	41904242-41904244-chr19-In_Frame_Del-DEL-CTG-CTG--	2.38635e-05	ARHGEF1	CNTNAP2 13162.0 Intron	8.43654e-05	CNTNAP2	3001068-3001068-chr11-3'UTR-SNP-G-G-C	2.2971e-06	CARS	ERG 0.0 Flank	3.16574e-09	ERG	UBP1 Synonymous	8.1568e-06	UBP1
1323	100705039-100705039-chr8-Missense_Mutation-SNP-G-G-A	9.22081e-05	PABPC1	58357800-58357800-chr17-Frame_Shift_Del-DEL-C-C--	2.37288e-05	RNF43	PABPC1 78.0 Intron	8.42859e-05	PABPC1	COL1A1 43.0 UTR	2.28243e-06	COL1A1	CCDC6 Flank	3.10146e-09	CCDC6	ELF3 Synonymous	8.06095e-06	ELF3
1324	PDE4DIP 1804.0 Intron	9.2181e-05	PDE4DIP	85338329-85338329-chr8-Missense_Mutation-SNP-T-T-G	2.36226e-05	CA1	C3 34.0 Intron	8.40974e-05	C3	P2RY8 57.0 UTR	2.2391e-06	P2RY8	KIAA1549 0.0 Flank	3.09494e-09	KIAA1549	BMPR1A Synonymous	7.96489e-06	BMPR1A
1325	MITF Non_Silent	9.19384e-05	MITF	ANK1 1115.0 Non_Silent	2.358e-05	ANK1	MTA1 869.0 Intron	8.39472e-05	MTA1	77281529-77281529-chr17-5'UTR-SNP-A-A-C	2.23152e-06	SEPT9	10738652-10738652-chr22-5'Flank-SNP-C-C-G	2.86248e-09	U2	PAX5 1804.0 Synonymous	7.76894e-06	PAX5
1326	ASXL1 Non_Silent	9.18815e-05	ASXL1	XPA 376.0 Non_Silent	2.34168e-05	XPA	152235948-152235948-chr7-Intron-SNP-G-G-A	8.37013e-05	KMT2C	FBXW7 UTR	2.22545e-06	FBXW7	ARID2 0.0 Flank	2.82946e-09	ARID2	ID1 10.0 Synonymous	7.71121e-06	ID1
1327	ECT2L 1662.0 Intron	9.17083e-05	ECT2L	FOXO3 2083.0 Non_Silent	2.33696e-05	FOXO3	NUP98 1207.0 Intron	8.36908e-05	NUP98	117624165-117624166-chr1-3'UTR-DEL-TT-TT--	2.22075e-06	FAM46C	NRG1 Flank	2.80654e-09	NRG1	115090743-115090743-chr9-Synonymous-SNP-C-C-T	7.71118e-06	TNC
1328	102404597-102404597-chr10-Missense_Mutation-SNP-T-T-G	9.16634e-05	PSD	TMPRSS2 Non_Silent	2.33277e-05	TMPRSS2	ATRX 1895.0 Intron	8.36176e-05	ATRX	26748559-26748559-chr10-3'UTR-DEL-A-A--	2.17816e-06	ABI1	COL2A1 0.0 Flank	2.66384e-09	COL2A1	NPM1 Synonymous	7.71102e-06	NPM1
1329	138250994-138250994-chr8-Missense_Mutation-SNP-G-G-C	9.16597e-05	FAM135B	RABEP1 Non_Silent	2.33039e-05	RABEP1	RSPO2 1676.0 Intron	8.30835e-05	RSPO2	70597957-70597957-chr10-3'UTR-SNP-C-C-T	2.15285e-06	PRF1	C3 861.0 Flank	2.61203e-09	C3	TNN 353.0 Synonymous	7.69726e-06	TNN
1330	FANCD2 752.0 Intron	9.16552e-05	FANCD2	KAT7 Non_Silent	2.29775e-05	KAT7	EBP Intron	8.28288e-05	EBP	PDCD1LG2 1192.0 UTR	2.1473e-06	PDCD1LG2	CA1 435.0 Flank	2.58495e-09	CA1	EBP Synonymous	7.58176e-06	EBP
1331	FOXO3 Non_Silent	9.16347e-05	FOXO3	FAM46C Non_Silent	2.28432e-05	FAM46C	SDHA 369.0 Intron	8.28279e-05	SDHA	70959191-70959192-chr3-3'UTR-DEL-TT-TT--	2.09509e-06	FOXP1	LCP1 Flank	2.58096e-09	LCP1	8896008-8896008-chr19-Synonymous-SNP-G-G-A	7.41821e-06	MUC16
1332	GK Non_Silent	9.15683e-05	GK	SPEN 1616.0 Non_Silent	2.26258e-05	SPEN	ID2 Intron	8.27685e-05	ID2	65964328-65964329-chr12-3'UTR-DEL-TC-TC--	2.08681e-06	HMGA2	PDE4D 0.0 Flank	2.57326e-09	PDE4D	HIST1H4I 19.0 Synonymous	7.29065e-06	HIST1H4I
1333	TG 1991.0 Intron	9.14664e-05	TG	100709611-100709611-chr8-Missense_Mutation-SNP-C-C-A	2.25081e-05	PABPC1	169128114-169128114-chr3-Intron-SNP-A-A-C	8.20335e-05	MECOM	BCL2L1 30.0 UTR	2.07404e-06	BCL2L1	10732579-10732579-chr22-3'Flank-SNP-C-C-T	2.5584e-09	U2	LRP1B 5408.0 Synonymous	7.27529e-06	LRP1B
1334	PALB2 Intron	9.14023e-05	PALB2	TP53 131.0 Non_Silent	2.24949e-05	TP53	HRAS 19.0 Intron	8.18626e-05	HRAS	15847964-15847966-chr1-5'UTR-DEL-GCC-GCC--	2.0578e-06	SPEN	XPO1 Flank	2.55373e-09	XPO1	PABPC1 76.0 Synonymous	7.20268e-06	PABPC1
1335	STAG1 Intron	9.07488e-05	STAG1	MALT1 Non_Silent	2.2459e-05	MALT1	189880256-189880256-chr3-Intron-SNP-C-C-T	8.16982e-05	TP63	COL2A1 7.0 UTR	2.05608e-06	COL2A1	PDGFB Flank	2.4641e-09	PDGFB	AKT3 Synonymous	7.18355e-06	AKT3
1336	STAG2 Synonymous	9.03324e-05	STAG2	113241577-113241577-chr2-Missense_Mutation-SNP-A-A-G	2.24124e-05	PAX8	SMARCE1 114.0 Intron	8.16519e-05	SMARCE1	38918782-38918782-chr17-3'UTR-SNP-C-C-A	2.05275e-06	LASP1	FSTL3 142.0 Flank	2.36973e-09	FSTL3	FAT3 10292.0 Synonymous	7.04472e-06	FAT3
1337	43532715-43532715-chr17-Missense_Mutation-SNP-A-A-C	9.02899e-05	ETV4	SEPT6 Non_Silent	2.23988e-05	SEPT6	CLTC 984.0 Intron	8.13287e-05	CLTC	HERPUD1 3.0 UTR	2.04779e-06	HERPUD1	EPHA7 Flank	2.36524e-09	EPHA7	SUZ12 Synonymous	6.99596e-06	SUZ12
1338	NUTM1 Intron	9.02772e-05	NUTM1	ETNK1 Non_Silent	2.23616e-05	ETNK1	CA4 Intron	8.1315e-05	CA4	4301354-4301356-chr12-3'UTR-DEL-TTT-TTT--	2.04647e-06	CCND2	SDHB 711.0 Flank	2.32578e-09	SDHB	SMAD2 Synonymous	6.94483e-06	SMAD2
1339	33013253-33013253-chr1-Synonymous-SNP-G-G-A	9.01904e-05	AK2	TOP1 Non_Silent	2.23339e-05	TOP1	H3F3B Intron	8.11553e-05	H3F3B	NUP214 2160.0 UTR	1.99578e-06	NUP214	190179675-190179675-chr4-3'Flank-SNP-G-G-T	2.19456e-09	DUX4	LASP1 Synonymous	6.93729e-06	LASP1
1340	HNRNPA2B1 Non_Silent	9.00054e-05	HNRNPA2B1	STAG2 1715.0 Non_Silent	2.22153e-05	STAG2	LRIG3 49.0 Intron	8.11095e-05	LRIG3	PAX5 4017.0 UTR	1.98337e-06	PAX5	GRIN2A 8388.0 Flank	2.15763e-09	GRIN2A	PBRM1 1234.0 Synonymous	6.92794e-06	PBRM1
1341	H3F3B Intron	8.99991e-05	H3F3B	26779185-26779187-chr1-In_Frame_Del-DEL-GAA-GAA--	2.21507e-05	ARID1A	152273884-152273884-chr7-Intron-SNP-A-A-C	8.11066e-05	KMT2C	25676774-25676774-chr4-3'UTR-SNP-G-G-T	1.94714e-06	SLC34A2	10735119-10735119-chr22-3'Flank-SNP-A-A-T	2.08622e-09	U2	PTPRK 2252.0 Synonymous	6.90174e-06	PTPRK
1342	MYH11 Synonymous	8.99958e-05	MYH11	AKT3 Non_Silent	2.21488e-05	AKT3	PHF6 Intron	8.06969e-05	PHF6	CYP2C8 7.0 UTR	1.8963e-06	CYP2C8	190179637-190179637-chr4-3'Flank-SNP-A-A-T	2.06298e-09	DUX4	SBDS Synonymous	6.85638e-06	SBDS
1343	FUS 195.0 Intron	8.99604e-05	FUS	41708967-41708967-chr8-Nonsense_Mutation-SNP-G-G-T	2.20709e-05	ANK1	136737349-136737349-chr3-Intron-SNP-A-A-G	8.00219e-05	STAG1	TEC 31.0 UTR	1.89394e-06	TEC	EN1 112.0 Flank	2.02845e-09	EN1	AKAP9 2876.0 Synonymous	6.67681e-06	AKAP9
1344	PTPN1 Intron	8.98399e-05	PTPN1	SYK Non_Silent	2.17873e-05	SYK	CD7 Intron	7.99032e-05	CD7	HEY1 22.0 UTR	1.89032e-06	HEY1	10735502-10735502-chr22-3'Flank-SNP-A-A-G	2.00693e-09	U2	TP63 3541.0 Synonymous	6.67397e-06	TP63
1345	JUN Non_Silent	8.97781e-05	JUN	ERBB2 479.0 Non_Silent	2.17579e-05	ERBB2	81108344-81108345-chr14-Intron-DEL-TC-TC--	7.96337e-05	TSHR	48137278-48137278-chr4-3'UTR-SNP-T-T-G	1.88195e-06	TEC	MAML2 0.0 Flank	1.99932e-09	MAML2	1619334-1619334-chr19-Synonymous-SNP-G-G-A	6.66367e-06	TCF3
1346	DCAF12L2 Synonymous	8.97123e-05	DCAF12L2	CCNB1 Non_Silent	2.17553e-05	CCNB1	RAN Intron	7.95848e-05	RAN	64947364-64947364-chr16-3'UTR-DEL-T-T--	1.88125e-06	CDH11	MAFB 69.0 Flank	1.88894e-09	MAFB	1619340-1619340-chr19-Synonymous-SNP-T-T-C	6.6209e-06	TCF3
1347	AFF1 Non_Silent	8.9541e-05	AFF1	NKX2-1 Non_Silent	2.15729e-05	NKX2-1	TSC2 653.0 Intron	7.89837e-05	TSC2	HR 21.0 UTR	1.86047e-06	HR	SLC45A3 0.0 Flank	1.79306e-09	SLC45A3	OXR1 Synonymous	6.61554e-06	OXR1
1348	A1CF 711.0 Intron	8.94109e-05	A1CF	MN1 1013.0 Non_Silent	2.14778e-05	MN1	CCND1 Intron	7.89244e-05	CCND1	MYOD1 40.0 UTR	1.83521e-06	MYOD1	EBF1 8078.0 Flank	1.72236e-09	EBF1	MSI2 Synonymous	6.52777e-06	MSI2
1349	A1CF Non_Silent	8.93431e-05	A1CF	15928647-15928648-chr1-Frame_Shift_Del-DEL-GA-GA--	2.13641e-05	SPEN	CDK6 Intron	7.85648e-05	CDK6	FUS 229.0 UTR	1.82867e-06	FUS	CCND2 Flank	1.68563e-09	CCND2	ERCC2 305.0 Synonymous	6.49338e-06	ERCC2
1350	SIRPA 413.0 Non_Silent	8.93073e-05	SIRPA	130012982-130012982-chrX-Missense_Mutation-SNP-T-T-A	2.13124e-05	BCORL1	ATR 1007.0 Intron	7.79449e-05	ATR	MECOM 11574.0 UTR	1.82663e-06	MECOM	SALL4 Flank	1.67682e-09	SALL4	NF1 1737.0 Synonymous	6.44305e-06	NF1
1351	41940902-41940904-chr8-In_Frame_Del-DEL-CTC-CTC--	8.92812e-05	KAT6A	PAX8 512.0 Non_Silent	2.12196e-05	PAX8	ZRSR2 Intron	7.79124e-05	ZRSR2	RIN2 3.0 UTR	1.81651e-06	RIN2	DDX10 5520.0 Flank	1.67361e-09	DDX10	1293971-1293971-chr5-Synonymous-SNP-C-C-T	6.37071e-06	TERT
1352	31361099-31361099-chr10-Intron-SNP-C-C-A	8.90984e-05	ZEB1	PBX1 Non_Silent	2.11863e-05	PBX1	164820268-164820269-chr1-Intron-DEL-AG-AG--	7.78088e-05	PBX1	MAFB 62.0 UTR	1.78586e-06	MAFB	RARA 954.0 Flank	1.6515e-09	RARA	15820243-15820243-chrX-Synonymous-SNP-C-C-T	6.29333e-06	ZRSR2
1353	CARS Intron	8.86057e-05	CARS	NBEA 2062.0 Non_Silent	2.09708e-05	NBEA	ITGAV 712.0 Intron	7.75132e-05	ITGAV	71928003-71928003-chr16-3'UTR-SNP-A-A-G	1.78494e-06	IST1	190179952-190179952-chr4-3'Flank-SNP-T-T-C	1.61849e-09	DUX4	49039260-49039260-chr12-Synonymous-SNP-A-A-G	6.20187e-06	KMT2D
1354	122328157-122328157-chr12-Synonymous-SNP-C-C-T	8.84849e-05	CLIP1	100705051-100705051-chr8-Missense_Mutation-SNP-G-G-A	2.08402e-05	PABPC1	RALGDS 72.0 Intron	7.71588e-05	RALGDS	FUBP1 5.0 UTR	1.73635e-06	FUBP1	190179690-190179690-chr4-3'Flank-SNP-G-G-C	1.60049e-09	DUX4	PML 994.0 Synonymous	6.19545e-06	PML
1355	CSF3R Intron	8.84174e-05	CSF3R	IL7R 374.0 Non_Silent	2.08228e-05	IL7R	152185538-152185539-chr7-Intron-DEL-AG-AG--	7.69184e-05	KMT2C	XPO1 19.0 UTR	1.72174e-06	XPO1	PDCD1LG2 1215.0 Flank	1.52667e-09	PDCD1LG2	RMI2 5.0 Synonymous	6.01714e-06	RMI2
1356	SKI 1492.0 Intron	8.83661e-05	SKI	138567611-138567611-chr7-Missense_Mutation-SNP-A-A-C	2.07624e-05	TRIM24	KTN1 1391.0 Intron	7.64462e-05	KTN1	121479598-121479598-chr10-3'UTR-SNP-G-G-A	1.68867e-06	FGFR2	BMPR1A 0.0 Flank	1.51685e-09	BMPR1A	143358918-143358918-chr7-Synonymous-SNP-A-A-G	5.96975e-06	FAM131B
1357	ATR 2187.0 Intron	8.82792e-05	ATR	ERBB2 555.0 Non_Silent	2.07555e-05	ERBB2	CD74 Intron	7.64117e-05	CD74	NR4A3 842.0 UTR	1.68711e-06	NR4A3	CARD11 0.0 Flank	1.43919e-09	CARD11	GOPC Synonymous	5.8662e-06	GOPC
1358	RANBP2 Intron	8.82728e-05	RANBP2	25246055-25246055-chr2-Missense_Mutation-SNP-A-A-C	2.07262e-05	DNMT3A	POLQ 1241.0 Intron	7.63926e-05	POLQ	70959191-70959193-chr3-3'UTR-DEL-TTT-TTT--	1.68466e-06	FOXP1	EBF1 Flank	1.42563e-09	EBF1	11256966-11256966-chr1-Synonymous-SNP-A-A-C	5.85562e-06	MTOR
1359	PIK3CB Intron	8.81815e-05	PIK3CB	SEPT9 4226.0 Non_Silent	2.05624e-05	SEPT9	ARID2 3029.0 Intron	7.6096e-05	ARID2	KIT UTR	1.6629e-06	KIT	CNTNAP2 Flank	1.34933e-09	CNTNAP2	31185099-31185099-chr16-Synonymous-SNP-C-C-T	5.63562e-06	FUS
1360	8896136-8896137-chr19-Intron-INS-----T	8.81804e-05	MUC16	12608837-12608837-chr3-Nonsense_Mutation-SNP-G-G-T	2.05499e-05	RAF1	HNRNPA2B1 144.0 Intron	7.5954e-05	HNRNPA2B1	214809599-214809599-chr2-5'UTR-SNP-C-C-G	1.64874e-06	BARD1	DDR2 2961.0 Flank	1.31364e-09	DDR2	CARS 120.0 Synonymous	5.58477e-06	CARS
1361	C2orf44 Intron	8.80016e-05	C2orf44	SMAD3 Non_Silent	2.0441e-05	SMAD3	NONO Intron	7.58473e-05	NONO	CDKN1A 144.0 UTR	1.64791e-06	CDKN1A	10739096-10739096-chr22-5'Flank-SNP-T-T-C	1.24196e-09	U2	195780255-195780255-chr3-Synonymous-SNP-C-C-G	5.56249e-06	MUC4
1362	PABPC1 198.0 Intron	8.78891e-05	PABPC1	CEBPA Non_Silent	2.03945e-05	CEBPA	ROBO2 9656.0 Intron	7.57627e-05	ROBO2	PTPN1 1450.0 UTR	1.6359e-06	PTPN1	SLC45A3 Flank	1.21696e-09	SLC45A3	WT1 948.0 Synonymous	5.46972e-06	WT1
1363	GPHN Intron	8.76884e-05	GPHN	HERPUD1 Non_Silent	2.03839e-05	HERPUD1	ABL1 904.0 Intron	7.56384e-05	ABL1	68808384-68808384-chr12-5'UTR-SNP-A-A-G	1.63415e-06	MDM2	BCL9 Flank	1.14506e-09	BCL9	MTCP1 14.0 Synonymous	5.28747e-06	MTCP1
1364	41143014-41143015-chr5-Splice_Region-DEL-GA-GA--	8.76433e-05	C6	FOXO4 Non_Silent	2.0223e-05	FOXO4	DEK Intron	7.54523e-05	DEK	91940976-91940976-chr7-5'UTR-SNP-G-G-C	1.62797e-06	AKAP9	PRRX1 1512.0 Flank	1.14399e-09	PRRX1	49417897-49417897-chr3-Synonymous-SNP-C-C-T	5.25535e-06	AMT
1365	92000141-92000142-chr14-Intron-DEL-AC-AC--	8.76147e-05	TRIP11	TBX3 Non_Silent	2.01571e-05	TBX3	GATA2 Intron	7.52074e-05	GATA2	101137044-101137044-chr10-3'UTR-SNP-G-G-A	1.61554e-06	TLX1	CCNB1IP1 Flank	1.10655e-09	CCNB1IP1	NDRG1 Synonymous	5.23377e-06	NDRG1
1366	AFF4 436.0 Synonymous	8.7547e-05	AFF4	TBP Non_Silent	2.01054e-05	TBP	236619-236619-chr5-Intron-SNP-G-G-C	7.46721e-05	SDHA	211377000-211377000-chr2-3'UTR-SNP-C-C-T	1.5951e-06	ERBB4	NF1 71.0 Flank	1.10122e-09	NF1	TEC 560.0 Synonymous	5.19067e-06	TEC
1367	GRIN2A Intron	8.75088e-05	GRIN2A	BCL6 88.0 Non_Silent	1.99803e-05	BCL6	152185690-152185690-chr7-Intron-SNP-A-A-T	7.44323e-05	KMT2C	60457367-60457367-chr2-3'UTR-DEL-A-A--	1.57614e-06	BCL11A	6009157-6009157-chr7-5'Flank-SNP-C-C-T	1.09556e-09	PMS2	ECT2 Synonymous	5.11504e-06	ECT2
1368	TRIM24 Non_Silent	8.74414e-05	TRIM24	RD3 Non_Silent	1.99253e-05	RD3	TERT 515.0 Intron	7.44321e-05	TERT	68298572-68298573-chr5-3'UTR-DEL-AA-AA--	1.56236e-06	PIK3R1	FBXO11 1979.0 Flank	1.08323e-09	FBXO11	AKT2 Synonymous	5.1065e-06	AKT2
1369	NOTCH2 Intron	8.73976e-05	NOTCH2	IDH2 Non_Silent	1.99225e-05	IDH2	152265211-152265211-chr7-Splice_Site-SNP-T-T-C	7.43844e-05	KMT2C	PABPC1 6.0 UTR	1.55311e-06	PABPC1	EXT2 2986.0 Flank	1.04109e-09	EXT2	NCOR2 955.0 Synonymous	4.98499e-06	NCOR2
1370	ITK Non_Silent	8.73331e-05	ITK	116740945-116740945-chr7-Missense_Mutation-SNP-T-T-G	1.97625e-05	MET	10063978-10063978-chr3-Intron-DEL-T-T--	7.35824e-05	FANCD2	389102-389107-chr12-5'UTR-DEL-GGGGGG-GGGGGG--	1.54075e-06	KDM5A	HERPUD1 258.0 Flank	1.02036e-09	HERPUD1	ISX Synonymous	4.96483e-06	ISX
1371	HSP90AB1 132.0 UTR	8.7324e-05	HSP90AB1	PABPC1 299.0 Non_Silent	1.97559e-05	PABPC1	47994485-47994486-chr12-Splice_Region-DEL-GA-GA--	7.34079e-05	COL2A1	CSF1R 11.0 UTR	1.5133e-06	CSF1R	PDGFRA 1385.0 Flank	9.89984e-10	PDGFRA	CD274 Synonymous	4.95783e-06	CD274
1372	95711812-95711813-chr14-Intron-DEL-AG-AG--	8.68783e-05	TCL1A	CNTRL 1208.0 Non_Silent	1.97488e-05	CNTRL	MECOM 564.0 Intron	7.33619e-05	MECOM	50582818-50582819-chr20-3'UTR-INS-----G	1.50181e-06	PTPN1	DUX4 77.0 Flank	9.60133e-10	DUX4	CS Synonymous	4.94623e-06	CS
1373	FBXO11 Intron	8.68716e-05	FBXO11	MAPK1 Non_Silent	1.96664e-05	MAPK1	175146835-175146838-chr1-Intron-DEL-TAAT-TAAT--	7.32374e-05	TNN	218241-218241-chr5-5'UTR-SNP-T-T-C	1.50029e-06	SDHA	190179755-190179755-chr4-3'Flank-SNP-G-G-A	9.56999e-10	DUX4	CDH11 890.0 Synonymous	4.92563e-06	CDH11
1374	LRIG3 Non_Silent	8.68377e-05	LRIG3	KMT2A 1392.0 Non_Silent	1.96613e-05	KMT2A	MYH9 778.0 Intron	7.31739e-05	MYH9	DROSHA 2572.0 UTR	1.4899e-06	DROSHA	190179718-190179718-chr4-3'Flank-SNP-C-C-A	9.51462e-10	DUX4	C2orf44 Synonymous	4.85365e-06	C2orf44
1375	TCF7 Intron	8.6657e-05	TCF7	97693680-97693682-chr9-In_Frame_Del-DEL-TTC-TTC--	1.96274e-05	XPA	DNAJB1 Intron	7.31368e-05	DNAJB1	36281508-36281509-chr22-3'UTR-DEL-AA-AA--	1.4816e-06	MYH9	190179907-190179907-chr4-3'Flank-SNP-A-A-G	8.88361e-10	DUX4	WIF1 Synonymous	4.7009e-06	WIF1
1376	HSP90AB1 130.0 Synonymous	8.6503e-05	HSP90AB1	EBF1 Non_Silent	1.96273e-05	EBF1	KEAP1 Intron	7.28802e-05	KEAP1	PLAG1 69.0 UTR	1.46862e-06	PLAG1	IL21R Flank	8.00838e-10	IL21R	CUX1 9150.0 Synonymous	4.69055e-06	CUX1
1377	SF3B1 Intron	8.64519e-05	SF3B1	TBL1XR1 Non_Silent	1.9559e-05	TBL1XR1	TRIM2 3111.0 Intron	7.28114e-05	TRIM2	NFE2 64.0 UTR	1.46645e-06	NFE2	NF1 Flank	7.9196e-10	NF1	43532750-43532750-chr17-Synonymous-SNP-A-A-C	4.68399e-06	ETV4
1378	ALK Synonymous	8.63881e-05	ALK	29942825-29942825-chr6-Missense_Mutation-SNP-G-G-T	1.95171e-05	HLA-A	23273587-23273587-chr22-Intron-SNP-T-T-G	7.27453e-05	BCR	198756302-198756302-chr1-3'UTR-SNP-A-A-G	1.44029e-06	PTPRC	CEP89 0.0 Flank	7.19053e-10	CEP89	108733993-108733993-chrX-Synonymous-SNP-A-A-G	4.67011e-06	IRS4
1379	TET1 Synonymous	8.63859e-05	TET1	106457062-106457062-chr2-Missense_Mutation-SNP-C-C-A	1.94175e-05	RGPD3	152247776-152247776-chr7-Intron-SNP-C-C-T	7.2509e-05	KMT2C	MYH9 23.0 UTR	1.43576e-06	MYH9	FH 0.0 Flank	7.17604e-10	FH	39511604-39511604-chr17-Synonymous-SNP-A-A-C	4.66264e-06	CDK12
1380	TRIM3 Synonymous	8.62694e-05	TRIM3	SRSF2 Non_Silent	1.93724e-05	SRSF2	RGS7 1861.0 Intron	7.23145e-05	RGS7	29268120-29268120-chr22-5'UTR-SNP-C-C-A	1.42666e-06	EWSR1	LIFR Flank	7.02555e-10	LIFR	MB Synonymous	4.59683e-06	MB
1381	74988957-74988957-chr10-Intron-SNP-T-T-G	8.6189e-05	KAT6B	NFE2L2 76.0 Non_Silent	1.93608e-05	NFE2L2	PICALM 627.0 Intron	7.22234e-05	PICALM	218266-218267-chr5-5'UTR-INS-----C	1.42495e-06	SDHA	IKZF1 2008.0 Flank	6.02419e-10	IKZF1	CDK12 992.0 Synonymous	4.51159e-06	CDK12
1382	CCNE1 Intron	8.59189e-05	CCNE1	STAT3 415.0 Non_Silent	1.92815e-05	STAT3	FGFR3 234.0 Intron	7.20286e-05	FGFR3	94530074-94530082-chr1-3'UTR-DEL-AAAAAAAAA-AAAAAAAAA--	1.41011e-06	F3	10735260-10735260-chr22-3'Flank-SNP-C-C-T	5.93266e-10	U2	FAT4 60.0 Synonymous	4.40219e-06	FAT4
1383	44253562-44253562-chr6-Synonymous-SNP-C-C-T	8.58754e-05	HSP90AB1	KDSR Non_Silent	1.92749e-05	KDSR	NUP214 502.0 Intron	7.15517e-05	NUP214	94439864-94439864-chr13-3'UTR-SNP-G-G-C	1.4086e-06	DCT	FH Flank	5.85791e-10	FH	SP8 Synonymous	4.36876e-06	SP8
1384	HSP90AB1 Non_Silent	8.58602e-05	HSP90AB1	72957798-72957800-chr16-In_Frame_Del-DEL-GCC-GCC--	1.92721e-05	ZFHX3	DDR2 2951.0 Intron	7.14368e-05	DDR2	SMC1A 119.0 UTR	1.40397e-06	SMC1A	HLA-A 0.0 Flank	5.77933e-10	HLA-A	ATF1 Synonymous	4.31293e-06	ATF1
1385	89327120-89327120-chr15-Intron-SNP-A-A-C	8.58469e-05	POLG	TP53 132.0 Non_Silent	1.92038e-05	TP53	SS18 Intron	7.13927e-05	SS18	FNBP1 65.0 UTR	1.38204e-06	FNBP1	65102478-65102479-chr14-5'Flank-DEL-CA-CA--	5.18009e-10	MAX	YOD1 Synonymous	4.15214e-06	YOD1
1386	MN1 1014.0 Non_Silent	8.5667e-05	MN1	NOTCH1 487.0 Non_Silent	1.91934e-05	NOTCH1	ETV1 1885.0 Intron	7.10966e-05	ETV1	EZR 20.0 UTR	1.37846e-06	EZR	190179565-190179565-chr4-3'Flank-SNP-G-G-T	5.16605e-10	DUX4	126164707-126164707-chrX-Synonymous-SNP-G-G-A	4.01597e-06	DCAF12L2
1387	10047693-10047693-chr3-Intron-SNP-G-G-A	8.53392e-05	FANCD2	108244022-108244022-chr11-Missense_Mutation-SNP-G-G-A	1.91726e-05	ATM	108248911-108248911-chr11-Intron-SNP-T-T-G	7.09875e-05	ATM	FUBP1 614.0 UTR	1.36036e-06	FUBP1	RALGDS 471.0 Flank	4.95717e-10	RALGDS	CSF3 29.0 Synonymous	3.89006e-06	CSF3
1388	MLLT4 0.0 Flank	8.5303e-05	MLLT4	6582652-6582652-chr12-Missense_Mutation-SNP-C-C-A	1.91667e-05	CHD4	KDR 701.0 Intron	7.08988e-05	KDR	ISX 393.0 UTR	1.35493e-06	ISX	TCF3 Flank	4.8014e-10	TCF3	SS18 Synonymous	3.81816e-06	SS18
1389	CHD4 233.0 Synonymous	8.51564e-05	CHD4	MUC16 2081.0 Non_Silent	1.91289e-05	MUC16	SEPT9 517.0 Intron	7.08505e-05	SEPT9	ZNF384 429.0 UTR	1.35058e-06	ZNF384	WT1 0.0 Flank	4.78524e-10	WT1	ESR1 2737.0 Synonymous	3.73308e-06	ESR1
1390	KIAA1549 Synonymous	8.50517e-05	KIAA1549	MDM2 Non_Silent	1.90484e-05	MDM2	CTNND2 195.0 Intron	7.06909e-05	CTNND2	TEC 30.0 UTR	1.33724e-06	TEC	CNTNAP2 46094.0 Flank	4.74273e-10	CNTNAP2	50809588-50809588-chr12-Splice_Region-SNP-C-C-T	3.61458e-06	ATF1
1391	APC Non_Silent	8.49759e-05	APC	CDK6 Non_Silent	1.90395e-05	CDK6	29942714-29942714-chr6-Intron-SNP-C-C-A	7.05519e-05	HLA-A	F3 18.0 UTR	1.33247e-06	F3	5575306-5575309-chr9-3'Flank-DEL-ACAC-ACAC--	4.65331e-10	PDCD1LG2	136497184-136497184-chr9-Synonymous-SNP-G-G-A	3.60961e-06	NOTCH1
1392	ACSL6 738.0 Intron	8.48372e-05	ACSL6	KLF4 Non_Silent	1.89965e-05	KLF4	CEP89 845.0 Intron	7.03699e-05	CEP89	48266983-48266983-chrX-3'UTR-SNP-C-C-G	1.3298e-06	SSX1	ID3 Flank	4.09432e-10	ID3	68293360-68293360-chr5-Synonymous-SNP-C-C-T	3.59589e-06	PIK3R1
1393	152411453-152411455-chr4-In_Frame_Del-DEL-CTC-CTC--	8.48241e-05	FBXW7	100718107-100718107-chr8-Missense_Mutation-SNP-C-C-A	1.88304e-05	PABPC1	MUC4 416.0 Intron	7.03506e-05	MUC4	10928866-10928866-chr16-3'UTR-DEL-A-A--	1.31179e-06	CIITA	190179688-190179688-chr4-3'Flank-SNP-G-G-A	3.96512e-10	DUX4	CDH11 1221.0 Synonymous	3.57895e-06	CDH11
1394	CD209 Flank	8.47347e-05	CD209	8896088-8896088-chr19-Missense_Mutation-SNP-T-T-A	1.88226e-05	MUC16	31361053-31361053-chr10-Intron-SNP-C-C-A	7.01333e-05	ZEB1	CDH10 11.0 UTR	1.30598e-06	CDH10	PICALM Flank	3.96021e-10	PICALM	8910441-8910441-chr19-Synonymous-SNP-C-C-T	3.56855e-06	MUC16
1395	MLLT1 Non_Silent	8.43504e-05	MLLT1	APOB 59.0 Non_Silent	1.88117e-05	APOB	CBFB Intron	7.01307e-05	CBFB	CCND1 3.0 UTR	1.29699e-06	CCND1	CCND1 269.0 Flank	3.90118e-10	CCND1	TCEA1 Synonymous	3.53301e-06	TCEA1
1396	CASP8 Intron	8.43323e-05	CASP8	PIK3CA 1716.0 Non_Silent	1.86533e-05	PIK3CA	PRCC Intron	6.98782e-05	PRCC	53486073-53486077-chr5-3'UTR-DEL-AAAAA-AAAAA--	1.28105e-06	FST	TRIM24 0.0 Flank	3.89419e-10	TRIM24	92012614-92012614-chr7-Synonymous-SNP-A-A-G	3.51667e-06	AKAP9
1397	42291675-42291675-chr19-Missense_Mutation-SNP-G-G-C	8.41538e-05	CIC	FAH Non_Silent	1.86218e-05	FAH	60800672-60800672-chr8-Intron-SNP-C-C-A	6.98129e-05	CHD7	107899629-107899629-chr8-3'UTR-DEL-A-A--	1.25194e-06	RSPO2	COL1A1 0.0 Flank	3.82704e-10	COL1A1	TMEM127 Synonymous	3.43753e-06	TMEM127
1398	HIP1 Non_Silent	8.41377e-05	HIP1	NOTCH1 485.0 Non_Silent	1.86144e-05	NOTCH1	MYH9 655.0 Intron	6.97062e-05	MYH9	56609431-56609431-chr16-3'UTR-SNP-G-G-C	1.24047e-06	MT2A	190177980-190177980-chr4-3'Flank-SNP-G-G-A	3.79985e-10	DUX4	128487017-128487017-chr3-Synonymous-SNP-G-G-C	3.43576e-06	GATA2
1399	GPC3 Intron	8.41199e-05	GPC3	44253108-44253108-chr6-Missense_Mutation-SNP-A-A-G	1.85998e-05	HSP90AB1	GATA3 Intron	6.96806e-05	GATA3	ELN 8.0 UTR	1.23788e-06	ELN	ARID1B Flank	3.77334e-10	ARID1B	150057580-150057580-chr5-Synonymous-SNP-G-G-A	3.43253e-06	CSF1R
1400	152265205-152265205-chr7-Missense_Mutation-SNP-C-C-G	8.3948e-05	KMT2C	100715564-100715564-chr8-Missense_Mutation-SNP-C-C-T	1.85366e-05	PABPC1	21536020-21536020-chr19-Intron-SNP-A-A-G	6.9032e-05	ZNF429	2514476-2514476-chr4-3'UTR-SNP-A-A-C	1.23056e-06	RNF4	PABPC1 397.0 Flank	3.71876e-10	PABPC1	HSP90AA1 419.0 Synonymous	3.42774e-06	HSP90AA1
1401	PCM1 Non_Silent	8.38391e-05	PCM1	254484-254484-chr5-Missense_Mutation-SNP-A-A-T	1.84577e-05	SDHA	PTPRT 14366.0 Intron	6.85842e-05	PTPRT	56165992-56165992-chr8-3'UTR-DEL-A-A--	1.22783e-06	PLAG1	BCOR 0.0 Flank	3.50046e-10	BCOR	15935981-15935981-chr1-Synonymous-SNP-T-T-C	3.42055e-06	SPEN
1402	152326137-152326137-chr4-Missense_Mutation-SNP-G-G-C	8.36522e-05	FBXW7	TSC1 119.0 Non_Silent	1.84367e-05	TSC1	CREBBP 1053.0 Intron	6.83833e-05	CREBBP	129212540-129212540-chr7-3'UTR-SNP-C-C-T	1.22776e-06	SMO	COL3A1 Flank	3.39405e-10	COL3A1	53666436-53666436-chr3-Synonymous-SNP-C-C-G	3.39714e-06	CACNA1D
1403	BLM Non_Silent	8.34902e-05	BLM	PTEN 1401.0 Non_Silent	1.8131e-05	PTEN	TG 533.0 Intron	6.8263e-05	TG	129890399-129890400-chr9-3'UTR-DEL-GA-GA--	1.20818e-06	FNBP1	IL6ST Flank	3.3764e-10	IL6ST	26032019-26032019-chr6-Synonymous-SNP-A-A-C	3.39549e-06	HIST1H3B
1404	PRDM2 Intron	8.34662e-05	PRDM2	SMAD4 565.0 Non_Silent	1.7959e-05	SMAD4	31361081-31361081-chr10-Intron-SNP-A-A-G	6.80847e-05	ZEB1	97675352-97675352-chr9-3'UTR-DEL-T-T--	1.20038e-06	XPA	JUN Flank	2.96187e-10	JUN	149021116-149021116-chr1-Synonymous-SNP-C-C-T	3.20339e-06	PDE4DIP
1405	45893388-45893389-chr12-Intron-DEL-TC-TC--	8.34564e-05	ARID2	ARID1B 8460.0 Non_Silent	1.79382e-05	ARID1B	PER1 195.0 Intron	6.80803e-05	PER1	2563346-2563346-chr1-3'UTR-SNP-G-G-A	1.20035e-06	TNFRSF14	PABPC1 Flank	2.94948e-10	PABPC1	POU5F1 126.0 Synonymous	3.18389e-06	POU5F1
1406	WHSC1 Intron	8.33282e-05	WHSC1	HOXD11 Non_Silent	1.7881e-05	HOXD11	SS18L1 Intron	6.7938e-05	SS18L1	20141792-20141792-chrX-5'UTR-SNP-G-G-A	1.19419e-06	EIF1AX	NUP214 0.0 Flank	2.8645e-10	NUP214	PIK3R1 1553.0 Synonymous	3.138e-06	PIK3R1
1407	FLT4 Non_Silent	8.32299e-05	FLT4	HNRNPA2B1 53.0 Non_Silent	1.77661e-05	HNRNPA2B1	BRCA2 1580.0 Intron	6.78904e-05	BRCA2	TMEM127 105.0 UTR	1.19095e-06	TMEM127	RSPO2 Flank	2.77007e-10	RSPO2	ZNRF3 3341.0 Synonymous	3.07599e-06	ZNRF3
1408	LARP4B Intron	8.30599e-05	LARP4B	FH Non_Silent	1.77072e-05	FH	ABL2 259.0 Intron	6.78048e-05	ABL2	CBL 1883.0 UTR	1.18679e-06	CBL	ETNK1 Flank	2.67247e-10	ETNK1	93290013-93290013-chr9-Synonymous-SNP-C-C-G	3.0354e-06	WNK2
1409	MECOM UTR	8.22032e-05	MECOM	MYOD1 Non_Silent	1.76223e-05	MYOD1	MLLT10 2943.0 Intron	6.77632e-05	MLLT10	PLAG1 102.0 UTR	1.1746e-06	PLAG1	190179574-190179574-chr4-3'Flank-SNP-C-C-A	2.67196e-10	DUX4	CDK4 Synonymous	3.00293e-06	CDK4
1410	75022148-75022150-chr10-In_Frame_Del-DEL-GAA-GAA--	8.21937e-05	KAT6B	65076600-65076600-chr14-Missense_Mutation-SNP-T-T-G	1.75775e-05	MAX	BCL3 Intron	6.75524e-05	BCL3	ID2 66.0 UTR	1.16743e-06	ID2	FSTL3 0.0 Flank	2.43865e-10	FSTL3	COA1 122.0 Synonymous	2.98484e-06	COA1
1411	57099758-57099758-chr12-Intron-SNP-T-T-G	8.19978e-05	STAT6	C2orf44 173.0 Non_Silent	1.75458e-05	C2orf44	21807855-21807856-chr22-Intron-DEL-AG-AG--	6.75317e-05	MAPK1	54009971-54009971-chr4-3'UTR-SNP-C-C-A	1.1662e-06	CHIC2	CASP8 0.0 Flank	2.39491e-10	CASP8	33036775-33036775-chr1-Synonymous-SNP-G-G-A	2.94679e-06	AK2
1412	DDX3X Intron	8.18518e-05	DDX3X	ZNF2 330.0 Non_Silent	1.74715e-05	ZNF2	TFE3 Intron	6.75157e-05	TFE3	CALR 108.0 UTR	1.16198e-06	CALR	MN1 Flank	2.25442e-10	MN1	OXR1 5321.0 Synonymous	2.92795e-06	OXR1
1413	MEN1 Intron	8.17803e-05	MEN1	SRC Non_Silent	1.73628e-05	SRC	PRDM16 3.0 Intron	6.74954e-05	PRDM16	FBLN2 1781.0 UTR	1.1521e-06	FBLN2	10734883-10734883-chr22-3'Flank-SNP-C-C-A	2.16893e-10	U2	HRAS Synonymous	2.88785e-06	HRAS
1414	56166699-56166699-chr8-Missense_Mutation-SNP-T-T-G	8.17658e-05	PLAG1	LARP4 Non_Silent	1.73449e-05	LARP4	152238907-152238907-chr7-Intron-SNP-A-A-G	6.73752e-05	KMT2C	CTCF 1510.0 UTR	1.1478e-06	CTCF	BRCA1 0.0 Flank	2.04444e-10	BRCA1	CLP1 Synonymous	2.88593e-06	CLP1
1415	PTPN11 Intron	8.13306e-05	PTPN11	NCKIPSD Non_Silent	1.7209e-05	NCKIPSD	SDHAF2 Intron	6.69935e-05	SDHAF2	DAXX 2.0 UTR	1.12204e-06	DAXX	DCTN1 Flank	1.8414e-10	DCTN1	NCOR2 316.0 Synonymous	2.84022e-06	NCOR2
1416	8910510-8910510-chr19-Splice_Site-SNP-T-T-G	8.13246e-05	MUC16	108749114-108749114-chr2-Missense_Mutation-SNP-A-A-G	1.71443e-05	RANBP2	10047660-10047663-chr3-Intron-DEL-TGTT-TGTT--	6.69485e-05	FANCD2	CIITA 2.0 UTR	1.1182e-06	CIITA	74826572-74826572-chr10-5'Flank-SNP-T-T-G	1.81087e-10	KAT6B	37912124-37912124-chr7-Synonymous-SNP-G-G-A	2.81486e-06	SFRP4
1417	CSF3R Synonymous	8.13184e-05	CSF3R	72788135-72788137-chr16-In_Frame_Del-DEL-GCT-GCT--	1.71412e-05	ZFHX3	55759144-55759144-chr6-Intron-SNP-C-C-A	6.6727e-05	BMP5	TNK1 41.0 UTR	1.11552e-06	TNK1	ROBO2 Flank	1.79936e-10	ROBO2	74044402-74044402-chr15-Synonymous-SNP-G-G-T	2.75008e-06	PML
1418	152273712-152273712-chr7-Synonymous-SNP-A-A-T	8.12594e-05	KMT2C	MUC16 1160.0 Non_Silent	1.71209e-05	MUC16	CDC7 260.0 Intron	6.65705e-05	CDC7	2490464-2490464-chr4-5'UTR-SNP-T-T-C	1.0941e-06	RNF4	RNF2 1146.0 Flank	1.79373e-10	RNF2	TFRC 496.0 Synonymous	2.73649e-06	TFRC
1419	NUTM2A 149.0 Synonymous	8.12522e-05	NUTM2A	41892660-41892660-chr19-Missense_Mutation-SNP-T-T-G	1.70965e-05	ARHGEF1	17423008-17423008-chr1-Intron-SNP-G-G-A	6.65271e-05	RCC2	29193159-29193160-chr2-3'UTR-INS-----ATTG	1.09043e-06	ALK	TBL1X Flank	1.54189e-10	TBL1X	THRAP3 1446.0 Synonymous	2.71173e-06	THRAP3
1420	CYLD 810.0 Intron	8.1087e-05	CYLD	RB1 3460.0 Non_Silent	1.7061e-05	RB1	112289302-112289304-chr8-Intron-DEL-CTA-CTA--	6.65262e-05	CSMD3	EWSR1 5.0 UTR	1.06985e-06	EWSR1	RARA Flank	1.53415e-10	RARA	WWTR1 Synonymous	2.67456e-06	WWTR1
1421	MECOM Non_Silent	8.10228e-05	MECOM	SMARCE1 Non_Silent	1.69934e-05	SMARCE1	NF1 4865.0 Intron	6.63041e-05	NF1	SMARCA4 2021.0 UTR	1.06754e-06	SMARCA4	TRIM3 0.0 Flank	1.51471e-10	TRIM3	SGK1 38.0 Synonymous	2.65673e-06	SGK1
1422	CTNNB1 555.0 Intron	8.09725e-05	CTNNB1	MUC16 1378.0 Non_Silent	1.69857e-05	MUC16	POLG 136.0 Intron	6.62864e-05	POLG	AKT2 71.0 UTR	1.06681e-06	AKT2	10736931-10736933-chr22-5'Flank-DEL-TTA-TTA--	1.47777e-10	U2	73419522-73419522-chr4-Synonymous-SNP-C-C-T	2.58552e-06	ALB
1423	TP53 26.0 Non_Silent	8.09292e-05	TP53	ARHGEF12 2826.0 Non_Silent	1.68514e-05	ARHGEF12	TG 1990.0 Intron	6.6171e-05	TG	NFKBIE 153.0 UTR	1.06153e-06	NFKBIE	NPM1 Flank	1.46494e-10	NPM1	NCOA4 Synonymous	2.55767e-06	NCOA4
1424	CREBBP 74.0 Non_Silent	8.09108e-05	CREBBP	27437573-27437573-chr16-Missense_Mutation-SNP-A-A-C	1.68133e-05	IL21R	42217112-42217113-chr17-Intron-DEL-CA-CA--	6.60305e-05	STAT5B	65076348-65076348-chr14-3'UTR-DEL-A-A--	1.04333e-06	MAX	RPL22 293.0 Flank	1.43238e-10	RPL22	MED1 26.0 Synonymous	2.46616e-06	MED1
1425	KMT2C 1900.0 Intron	8.03663e-05	KMT2C	23314599-23314599-chr22-Missense_Mutation-SNP-C-C-G	1.68075e-05	BCR	PDE4DIP 849.0 Intron	6.57916e-05	PDE4DIP	KEAP1 9.0 UTR	1.03489e-06	KEAP1	45370684-45370684-chr19-5'Flank-SNP-G-G-C	1.42903e-10	ERCC2	256393-256393-chr5-Synonymous-SNP-C-C-T	2.42767e-06	SDHA
1426	MKL1 Synonymous	7.98828e-05	MKL1	71198206-71198208-chr3-In_Frame_Del-DEL-TGC-TGC--	1.67929e-05	FOXP1	10064924-10064924-chr3-Intron-SNP-T-T-C	6.56246e-05	FANCD2	CSMD3 35.0 UTR	1.03107e-06	CSMD3	APOB 0.0 Flank	1.42215e-10	APOB	TOP1 Synonymous	2.32272e-06	TOP1
1427	SMC1A Non_Silent	7.98675e-05	SMC1A	156134461-156134461-chr1-Missense_Mutation-SNP-T-T-G	1.67004e-05	LMNA	MAML2 Intron	6.55849e-05	MAML2	192798364-192798364-chr3-3'UTR-DEL-A-A--	1.02817e-06	MB21D2	190179551-190179551-chr4-3'Flank-SNP-G-G-T	1.32222e-10	DUX4	195784041-195784041-chr3-Synonymous-SNP-T-T-A	2.17326e-06	MUC4
1428	NFATC2 Synonymous	7.98673e-05	NFATC2	108736280-108736282-chrX-In_Frame_Del-DEL-GCC-GCC--	1.65759e-05	IRS4	SALL4 Intron	6.53765e-05	SALL4	CARD11 1049.0 UTR	1.02747e-06	CARD11	HOXD11 Flank	1.31694e-10	HOXD11	TP53 26.0 Synonymous	2.16016e-06	TP53
1429	MAP3K1 Intron	7.97113e-05	MAP3K1	RPL22 Non_Silent	1.65696e-05	RPL22	41940656-41940657-chr8-Intron-DEL-AC-AC--	6.51178e-05	KAT6A	56163681-56163682-chr8-3'UTR-DEL-AC-AC--	1.02623e-06	PLAG1	ATP1A1 Flank	1.29266e-10	ATP1A1	108664066-108664066-chr6-Synonymous-SNP-C-C-T	2.15531e-06	FOXO3
1430	CTNNB1 Non_Silent	7.97102e-05	CTNNB1	EED Non_Silent	1.65635e-05	EED	STIL 1046.0 Intron	6.50132e-05	STIL	CDX2 20.0 UTR	1.01833e-06	CDX2	PICALM 0.0 Flank	1.23384e-10	PICALM	ERBB2 545.0 Synonymous	2.15212e-06	ERBB2
1431	STRN Intron	7.95986e-05	STRN	TOP1 1867.0 Non_Silent	1.64814e-05	TOP1	MYB 442.0 Intron	6.41275e-05	MYB	70637431-70637431-chr12-5'UTR-DEL-A-A--	1.01431e-06	PTPRB	CYSLTR2 Flank	1.19719e-10	CYSLTR2	SEPT6 Synonymous	2.14343e-06	SEPT6
1432	HOOK3 Intron	7.95008e-05	HOOK3	NSD1 1524.0 Non_Silent	1.64474e-05	NSD1	23634821-23634823-chr16-Intron-DEL-TCA-TCA--	6.40497e-05	PALB2	58747927-58747927-chr18-3'UTR-SNP-C-C-A	1.00337e-06	MALT1	10740626-10740626-chr22-5'Flank-SNP-T-T-A	1.11247e-10	U2	DCAF12L2 4.0 Synonymous	2.08334e-06	DCAF12L2
1433	DCC Non_Silent	7.94734e-05	DCC	KAT6A 86.0 Non_Silent	1.6429e-05	KAT6A	TSC2 654.0 Intron	6.39767e-05	TSC2	EP300 23.0 UTR	1.00162e-06	EP300	10740194-10740194-chr22-5'Flank-SNP-A-A-G	1.09421e-10	U2	58358393-58358393-chr17-Synonymous-SNP-C-C-G	2.07576e-06	RNF43
1434	149181991-149181991-chr3-Intron-SNP-G-G-C	7.93569e-05	CP	NCOA1 2444.0 Non_Silent	1.63769e-05	NCOA1	YWHAE 26.0 Intron	6.37605e-05	YWHAE	60866200-60866200-chr8-3'UTR-DEL-T-T--	1.00039e-06	CHD7	CD28 0.0 Flank	1.0704e-10	CD28	MLF1 Synonymous	2.05619e-06	MLF1
1435	FBXW7 Intron	7.92916e-05	FBXW7	57791659-57791659-chr11-Missense_Mutation-SNP-A-A-C	1.63135e-05	CTNND1	TCF7L2 3915.0 Intron	6.37601e-05	TCF7L2	PLAG1 56.0 UTR	1.00003e-06	PLAG1	F3 Flank	1.0054e-10	F3	90794249-90794249-chr15-Synonymous-SNP-G-G-A	1.96356e-06	BLM
1436	133095294-133095294-chr8-Intron-SNP-A-A-C	7.92779e-05	TG	CDX2 Non_Silent	1.62661e-05	CDX2	MAX Intron	6.36867e-05	MAX	53494977-53494977-chr3-5'UTR-DEL-T-T--	9.93258e-07	CACNA1D	DCAF12 809.0 Flank	9.71825e-11	DCAF12	69648142-69648142-chr11-Splice_Region-SNP-G-G-A	1.9356e-06	CCND1
1437	LRP1 1670.0 Non_Silent	7.92025e-05	LRP1	MUC4 696.0 Non_Silent	1.61941e-05	MUC4	LIFR 1078.0 Intron	6.36099e-05	LIFR	SGK1 2966.0 UTR	9.89269e-07	SGK1	MT2A 0.0 Flank	9.70489e-11	MT2A	40418590-40418590-chr22-Synonymous-SNP-C-C-T	1.92616e-06	MKL1
1438	HERPUD1 Intron	7.91353e-05	HERPUD1	MECOM 636.0 Non_Silent	1.60967e-05	MECOM	SI 1093.0 Intron	6.35722e-05	SI	KNSTRN 219.0 UTR	9.85259e-07	KNSTRN	COL2A1 632.0 Flank	8.61821e-11	COL2A1	TK1 258.0 Synonymous	1.92294e-06	TK1
1439	IKBKB Intron	7.91142e-05	IKBKB	176093630-176093630-chr2-Missense_Mutation-SNP-A-A-C	1.6042e-05	HOXD13	DICER1 271.0 Intron	6.32227e-05	DICER1	SDC4 39.0 UTR	9.77315e-07	SDC4	10731810-10731810-chr22-3'Flank-SNP-A-A-T	8.27428e-11	U2	RAD51B Synonymous	1.89135e-06	RAD51B
1440	ACVR2A Non_Silent	7.91077e-05	ACVR2A	MUC16 2334.0 Non_Silent	1.60419e-05	MUC16	29943619-29943619-chr6-Intron-SNP-A-A-G	6.31485e-05	HLA-A	TFE3 19.0 UTR	9.74035e-07	TFE3	SI 0.0 Flank	7.92454e-11	SI	2167008-2167008-chr11-Synonymous-SNP-C-C-T	1.87075e-06	TH
1441	29942916-29942916-chr6-Missense_Mutation-SNP-A-A-G	7.91069e-05	HLA-A	9688140-9688142-chrX-In_Frame_Del-DEL-GCG-GCG--	1.585e-05	TBL1X	47471158-47471158-chr2-Intron-SNP-C-C-A	6.3141e-05	MSH2	GPC3 7.0 UTR	9.66794e-07	GPC3	DCAF12 Flank	7.90039e-11	DCAF12	NT5C2 34.0 Synonymous	1.84318e-06	NT5C2
1442	9764976-9764978-chr16-Intron-DEL-CAG-CAG--	7.90769e-05	GRIN2A	186613250-186613250-chr4-Missense_Mutation-SNP-G-G-T	1.57684e-05	FAT1	31076298-31076298-chr8-Intron-SNP-A-A-T	6.29626e-05	WRN	27163509-27163509-chr7-3'UTR-SNP-T-T-G	9.60951e-07	HOXA9	FOXA1 103.0 Flank	7.2572e-11	FOXA1	14517018-14517018-chr19-Synonymous-SNP-A-A-C	1.82564e-06	DNAJB1
1443	CLTCL1 Non_Silent	7.88981e-05	CLTCL1	RGS7 Non_Silent	1.57096e-05	RGS7	F7 Intron	6.2953e-05	F7	6451407-6451407-chr12-3'UTR-SNP-G-G-T	9.5934e-07	CD27	A1CF 0.0 Flank	6.56319e-11	A1CF	53666523-53666523-chr3-Synonymous-SNP-T-T-C	1.8078e-06	CACNA1D
1444	222918038-222918038-chr2-Splice_Region-SNP-C-C-T	7.88623e-05	ACSL3	ISX 388.0 Non_Silent	1.55964e-05	ISX	32939909-32939910-chr19-Intron-DEL-AT-AT--	6.26244e-05	CEP89	ID2 98.0 UTR	9.58851e-07	ID2	IL7R 0.0 Flank	5.40771e-11	IL7R	TFEB Synonymous	1.80093e-06	TFEB
1445	FOXO3 2082.0 Synonymous	7.88457e-05	FOXO3	187726757-187726757-chr3-Missense_Mutation-SNP-A-A-G	1.5509e-05	BCL6	HOXA11 Intron	6.19771e-05	HOXA11	61747211-61747212-chr14-3'UTR-INS-----T	9.53255e-07	HIF1A	190179715-190179715-chr4-3'Flank-SNP-C-C-T	5.16013e-11	DUX4	108663850-108663850-chr6-Synonymous-SNP-T-T-C	1.79635e-06	FOXO3
1446	ARAF Non_Silent	7.88104e-05	ARAF	TFE3 35.0 Non_Silent	1.55072e-05	TFE3	ROBO2 11646.0 Intron	6.19541e-05	ROBO2	OMD 67.0 UTR	9.49399e-07	OMD	PRDM2 Flank	4.98152e-11	PRDM2	FH Synonymous	1.78274e-06	FH
1447	PBX1 UTR	7.87911e-05	PBX1	ARHGAP5 297.0 Non_Silent	1.53401e-05	ARHGAP5	MTOR 1012.0 Intron	6.18599e-05	MTOR	BCL2L12 3.0 UTR	9.43441e-07	BCL2L12	190179497-190179497-chr4-3'Flank-SNP-G-G-A	4.47586e-11	DUX4	117385716-117385716-chr6-Synonymous-SNP-A-A-C	1.72048e-06	ROS1
1448	GNAS Non_Silent	7.86493e-05	GNAS	23791802-23791802-chr22-Missense_Mutation-SNP-A-A-C	1.53372e-05	SMARCB1	133095294-133095294-chr8-Intron-SNP-A-A-C	6.15672e-05	TG	PIK3CA 1832.0 UTR	9.40338e-07	PIK3CA	53416350-53416352-chr12-3'Flank-DEL-TTT-TTT--	4.31276e-11	SP1	NFE2L2 Synonymous	1.7123e-06	NFE2L2
1449	152273692-152273692-chr7-Intron-SNP-G-G-A	7.85322e-05	KMT2C	CCR4 Non_Silent	1.53049e-05	CCR4	169525780-169525780-chr1-Intron-SNP-C-C-A	6.14462e-05	F5	FGFR1OP 818.0 UTR	9.10396e-07	FGFR1OP	190179536-190179536-chr4-3'Flank-SNP-A-A-G	4.1806e-11	DUX4	F3 Synonymous	1.7009e-06	F3
1450	SPEN Synonymous	7.83006e-05	SPEN	236513-236513-chr5-Missense_Mutation-SNP-C-C-T	1.5297e-05	SDHA	ARHGEF12 2869.0 Intron	6.07633e-05	ARHGEF12	RMI2 108.0 UTR	9.07205e-07	RMI2	FOXO3 2500.0 Flank	3.99586e-11	FOXO3	POLE 714.0 Synonymous	1.69782e-06	POLE
1451	75556687-75556688-chr7-Intron-DEL-AA-AA--	7.82246e-05	HIP1	H3F3A Non_Silent	1.52648e-05	H3F3A	RGPD3 1163.0 Intron	6.07537e-05	RGPD3	37907356-37907356-chr7-3'UTR-SNP-A-A-T	9.06943e-07	SFRP4	PPARG Flank	3.95071e-11	PPARG	202012090-202012090-chr1-Synonymous-SNP-C-C-G	1.69575e-06	ELF3
1452	ABI1 Intron	7.81999e-05	ABI1	STAT6 228.0 Non_Silent	1.51352e-05	STAT6	48167674-48167674-chr4-Intron-SNP-T-T-G	6.0556e-05	TEC	ATP1A1 625.0 UTR	9.04651e-07	ATP1A1	ZNF479 0.0 Flank	3.44474e-11	ZNF479	140501714-140501714-chr2-Synonymous-SNP-G-G-A	1.67475e-06	LRP1B
1453	AK2 Intron	7.81962e-05	AK2	MUC4 780.0 Non_Silent	1.4964e-05	MUC4	CSMD3 23076.0 Intron	6.01557e-05	CSMD3	CRTC3 2244.0 UTR	9.0453e-07	CRTC3	PRCC 668.0 Flank	2.96042e-11	PRCC	ACKR3 233.0 Synonymous	1.63624e-06	ACKR3
1454	PIK3CA Intron	7.81959e-05	PIK3CA	SPEN 1763.0 Non_Silent	1.48815e-05	SPEN	CSMD3 24273.0 Intron	6.00772e-05	CSMD3	ABI1 40.0 UTR	8.98837e-07	ABI1	RBM15 Flank	2.90615e-11	RBM15	41473456-41473456-chr21-Synonymous-SNP-A-A-G	1.62396e-06	TMPRSS2
1455	33010835-33010836-chr1-3'Flank-INS-----TTG	7.81037e-05	AK2	138918536-138918536-chr7-Missense_Mutation-SNP-T-T-C	1.48484e-05	KIAA1549	BRAF 7.0 Intron	5.98477e-05	BRAF	CACNA1D 10.0 UTR	8.98757e-07	CACNA1D	RB1 Flank	2.8561e-11	RB1	CTNNA2 18454.0 Synonymous	1.62253e-06	CTNNA2
1456	71140798-71140800-chrX-In_Frame_Del-DEL-CAG-CAG--	7.81022e-05	MED12	68030557-68030557-chr8-Missense_Mutation-SNP-C-C-A	1.48071e-05	PREX2	EPAS1 1681.0 Intron	5.94713e-05	EPAS1	RAC1 561.0 UTR	8.95447e-07	RAC1	FGFR4 0.0 Flank	2.72031e-11	FGFR4	78186962-78186962-chr17-Synonymous-SNP-A-A-G	1.62237e-06	TK1
1457	RAC1 Intron	7.79679e-05	RAC1	29942949-29942949-chr6-Missense_Mutation-SNP-G-G-A	1.47944e-05	HLA-A	GNAQ Intron	5.92144e-05	GNAQ	20786861-20786861-chr7-5'UTR-DEL-T-T--	8.92113e-07	SP8	RLF 1593.0 Flank	2.6897e-11	RLF	CA4 Synonymous	1.60486e-06	CA4
1458	SGK1 Intron	7.78824e-05	SGK1	TBP 152.0 Non_Silent	1.47771e-05	TBP	TSC1 205.0 Intron	5.9037e-05	TSC1	34789605-34789606-chr21-3'UTR-DEL-CA-CA--	8.83433e-07	RUNX1	190179579-190179579-chr4-3'Flank-SNP-T-T-A	2.60891e-11	DUX4	6457389-6457389-chr11-Synonymous-SNP-G-G-A	1.59899e-06	TRIM3
1459	15244613-15244616-chr19-Intron-DEL-AGAC-AGAC--	7.78823e-05	BRD4	HOXD11 6.0 Non_Silent	1.47669e-05	HOXD11	KL Intron	5.87981e-05	KL	119300144-119300145-chr11-3'UTR-DEL-GT-GT--	8.7918e-07	CBL	190179621-190179621-chr4-3'Flank-SNP-A-A-T	2.52412e-11	DUX4	CCNE1 Synonymous	1.59583e-06	CCNE1
1460	STAT5B Non_Silent	7.7861e-05	STAT5B	APOB 669.0 Non_Silent	1.47481e-05	APOB	202012461-202012461-chr1-Intron-SNP-T-T-C	5.86828e-05	ELF3	CDKN2A 8.0 UTR	8.74249e-07	CDKN2A	SND1 8810.0 Flank	2.51424e-11	SND1	IK Synonymous	1.5848e-06	IK
1461	DDX10 Intron	7.77835e-05	DDX10	56882022-56882024-chr5-In_Frame_Del-DEL-CAA-CAA--	1.46849e-05	MAP3K1	33013403-33013403-chr1-Splice_Site-SNP-C-C-G	5.83523e-05	AK2	43128364-43128364-chr10-3'UTR-SNP-C-C-T	8.69666e-07	RET	TRIM33 Flank	2.29704e-11	TRIM33	TRIM3 176.0 Synonymous	1.54081e-06	TRIM3
1462	BCL11A Intron	7.77088e-05	BCL11A	NFKB2 44.0 Non_Silent	1.46752e-05	NFKB2	MYH11 1894.0 Intron	5.83161e-05	MYH11	29054981-29054982-chr22-3'UTR-DEL-AG-AG--	8.62425e-07	ZNRF3	PRF1 110.0 Flank	1.8525e-11	PRF1	MSH2 148.0 Synonymous	1.50134e-06	MSH2
1463	193142099-193142102-chr1-Intron-DEL-GAGA-GAGA--	7.76857e-05	CDC73	EIF1AX Non_Silent	1.45103e-05	EIF1AX	FSTL3 34.0 Intron	5.81671e-05	FSTL3	FEN1 1.0 UTR	8.6021e-07	FEN1	10731462-10731462-chr22-3'Flank-SNP-C-C-T	1.77485e-11	U2	180616388-180616388-chr5-Synonymous-SNP-G-G-A	1.49448e-06	FLT4
1464	ZFHX3 106.0 Non_Silent	7.75708e-05	ZFHX3	WAS Non_Silent	1.44294e-05	WAS	161673275-161673275-chr1-Intron-SNP-G-G-C	5.81113e-05	FCGR2B	KDR 29.0 UTR	8.57812e-07	KDR	CCND3 Flank	1.25039e-11	CCND3	WT1 173.0 Synonymous	1.46266e-06	WT1
1465	MN1 Non_Silent	7.75491e-05	MN1	SDC4 Non_Silent	1.44187e-05	SDC4	HLA-A 47.0 Intron	5.80737e-05	HLA-A	21968153-21968153-chr9-3'UTR-SNP-C-C-G	8.56785e-07	CDKN2A	ROS1 Flank	1.14759e-11	ROS1	T 181.0 Synonymous	1.44861e-06	T
1466	152238768-152238768-chr7-Missense_Mutation-SNP-T-T-C	7.7465e-05	KMT2C	MYCL Non_Silent	1.43523e-05	MYCL	SETD2 914.0 Intron	5.80658e-05	SETD2	TCP1 2.0 UTR	8.52336e-07	TCP1	HMGA1 Flank	1.06494e-11	HMGA1	102275602-102275602-chr8-Synonymous-SNP-A-A-C	1.41915e-06	UBR5
1467	COL1A1 68.0 Non_Silent	7.72469e-05	COL1A1	CTNNB1 504.0 Non_Silent	1.42946e-05	CTNNB1	FBXW7 626.0 Intron	5.79929e-05	FBXW7	55321020-55321021-chr17-3'UTR-DEL-TG-TG--	8.43374e-07	HLF	SIRPA Flank	8.66178e-12	SIRPA	GRIN2A 117.0 Synonymous	1.40557e-06	GRIN2A
1468	29944144-29944144-chr6-Synonymous-SNP-C-C-T	7.71401e-05	HLA-A	152187364-152187364-chr7-Missense_Mutation-SNP-T-T-G	1.41873e-05	KMT2C	ACVR2A 1105.0 Intron	5.79653e-05	ACVR2A	TRRAP 53.0 UTR	8.42397e-07	TRRAP	NPM1 0.0 Flank	7.91872e-12	NPM1	55671640-55671640-chr14-Synonymous-SNP-C-C-A	1.35355e-06	KTN1
1469	RPL10 UTR	7.70371e-05	RPL10	41140144-41140144-chr22-Missense_Mutation-SNP-C-C-A	1.41744e-05	EP300	TNF Intron	5.77229e-05	TNF	AKAP9 3.0 UTR	8.37123e-07	AKAP9	PRCC Flank	7.84147e-12	PRCC	80574221-80574221-chr2-Synonymous-SNP-T-T-C	1.35e-06	CTNNA2
1470	JUN 34.0 Non_Silent	7.70351e-05	JUN	BRD3 460.0 Non_Silent	1.4174e-05	BRD3	116769622-116769626-chr7-Intron-DEL-TTTTT-TTTTT--	5.76661e-05	MET	LIF 62.0 UTR	8.29251e-07	LIF	10737581-10737581-chr22-5'Flank-SNP-A-A-C	7.55832e-12	U2	34088401-34088401-chr9-Synonymous-SNP-T-T-C	1.34992e-06	DCAF12
1471	TBL1X 4463.0 Non_Silent	7.70081e-05	TBL1X	29943490-29943490-chr6-Missense_Mutation-SNP-T-T-A	1.41523e-05	HLA-A	FSTL3 Intron	5.75978e-05	FSTL3	44759708-44759710-chr19-3'UTR-DEL-CCC-CCC--	8.28676e-07	BCL3	PAX7 2348.0 Flank	7.33808e-12	PAX7	DGCR8 Synonymous	1.21786e-06	DGCR8
1472	50462563-50462563-chr12-Intron-SNP-A-A-C	7.70077e-05	LARP4	152235912-152235912-chr7-Missense_Mutation-SNP-C-C-T	1.41487e-05	KMT2C	TBL1X 4649.0 Intron	5.74261e-05	TBL1X	44265768-44265771-chr6-5'UTR-DEL-TCAT-TCAT--	8.27348e-07	NFKBIE	10736514-10736514-chr22-5'Flank-DEL-A-A--	5.89327e-12	U2	FBXW7 Synonymous	1.13283e-06	FBXW7
1473	85473668-85473669-chr8-Intron-DEL-AT-AT--	7.68651e-05	CA2	IRS4 34.0 Non_Silent	1.4131e-05	IRS4	152235734-152235734-chr7-Intron-SNP-T-T-A	5.71637e-05	KMT2C	PDE4DIP 2852.0 UTR	8.15296e-07	PDE4DIP	CRTC1 1887.0 Flank	5.70426e-12	CRTC1	92086348-92086348-chr7-Synonymous-SNP-C-C-T	1.08714e-06	AKAP9
1474	TSC2 Non_Silent	7.68348e-05	TSC2	DDX6 Non_Silent	1.39834e-05	DDX6	PDCD1LG2 Intron	5.71345e-05	PDCD1LG2	44259088-44259088-chr6-3'UTR-SNP-C-C-G	8.04941e-07	NFKBIE	SOCS1 Flank	5.02793e-12	SOCS1	EGFR 2736.0 Synonymous	1.06247e-06	EGFR
1475	31189856-31189856-chr16-Intron-SNP-C-C-A	7.67351e-05	FUS	175146935-175146935-chr1-Missense_Mutation-SNP-T-T-G	1.39302e-05	TNN	FAM131B Intron	5.70989e-05	FAM131B	PRDM1 426.0 UTR	8.04285e-07	PRDM1	RHOH Flank	4.47516e-12	RHOH	51475490-51475490-chr20-Synonymous-SNP-T-T-G	1.03038e-06	NFATC2
1476	ARID1A 734.0 Non_Silent	7.67076e-05	ARID1A	KMT2C 2605.0 Non_Silent	1.38974e-05	KMT2C	KMT2C 1016.0 Intron	5.69544e-05	KMT2C	40356696-40356696-chr17-3'UTR-SNP-A-A-C	7.95306e-07	RARA	BRCA1 1623.0 Flank	4.45959e-12	BRCA1	29942905-29942905-chr6-Synonymous-SNP-G-G-A	1.01981e-06	HLA-A
1477	KAT6B Intron	7.66881e-05	KAT6B	TAF15 294.0 Non_Silent	1.38793e-05	TAF15	10049365-10049365-chr3-Intron-SNP-C-C-T	5.6881e-05	FANCD2	SMARCE1 75.0 UTR	7.91548e-07	SMARCE1	ELF3 Flank	3.85159e-12	ELF3	120997539-120997539-chr12-Synonymous-SNP-C-C-T	1.01545e-06	HNF1A
1478	41668951-41668951-chr15-Synonymous-SNP-A-A-G	7.6517e-05	MGA	35824131-35824131-chr17-Missense_Mutation-SNP-T-T-G	1.34717e-05	TAF15	KNSTRN Intron	5.68585e-05	KNSTRN	BRD4 55.0 UTR	7.88297e-07	BRD4	CTNND2 Flank	3.81287e-12	CTNND2	MED12 113.0 Synonymous	9.67633e-07	MED12
1479	DICER1 Intron	7.63444e-05	DICER1	F2 Non_Silent	1.34094e-05	F2	158597021-158597021-chr3-Intron-SNP-C-C-G	5.66206e-05	MLF1	34227703-34227703-chr19-3'UTR-DEL-T-T--	7.8148e-07	LSM14A	FHIT Flank	3.65357e-12	FHIT	28986676-28986676-chr16-Synonymous-SNP-G-G-A	9.66063e-07	LAT
1480	FOXP1 Non_Silent	7.62333e-05	FOXP1	65537615-65537617-chr17-In_Frame_Del-DEL-TGG-TGG--	1.33335e-05	AXIN2	GRM3 Intron	5.65709e-05	GRM3	29942525-29942525-chr6-5'UTR-SNP-G-G-C	7.80325e-07	HLA-A	GATA2 Flank	3.59639e-12	GATA2	TP53 130.0 Synonymous	8.59267e-07	TP53
1481	DAXX Non_Silent	7.60166e-05	DAXX	207587428-207587428-chr1-Missense_Mutation-SNP-C-C-T	1.33229e-05	CR1	SPECC1 3329.0 Intron	5.63987e-05	SPECC1	65739899-65739899-chrX-3'UTR-SNP-A-A-C	7.7856e-07	MSN	10732535-10732535-chr22-3'Flank-SNP-G-G-C	3.41983e-12	U2	55155858-55155858-chr7-Synonymous-SNP-G-G-C	8.48582e-07	EGFR
1482	CHEK2 Synonymous	7.59993e-05	CHEK2	MAFB Non_Silent	1.32839e-05	MAFB	PAX3 1912.0 Intron	5.63569e-05	PAX3	CLTC UTR	7.78285e-07	CLTC	CD28 Flank	3.30582e-12	CD28	LEF1 Synonymous	8.47214e-07	LEF1
1483	COL3A1 440.0 Intron	7.59611e-05	COL3A1	SEPT5 Non_Silent	1.32632e-05	SEPT5	PIM1 Intron	5.62335e-05	PIM1	CREB3L1 UTR	7.76152e-07	CREB3L1	PBX1 Flank	2.85296e-12	PBX1	8976408-8976408-chr19-Synonymous-SNP-T-T-G	8.23355e-07	MUC16
1484	PPP6C UTR	7.58111e-05	PPP6C	ARID1A 1669.0 Non_Silent	1.32305e-05	ARID1A	CSMD3 2462.0 Intron	5.61333e-05	CSMD3	95037104-95037104-chr10-3'UTR-SNP-G-G-A	7.71274e-07	CYP2C8	FGFR1OP Flank	2.234e-12	FGFR1OP	134171131-134171131-chr6-Synonymous-SNP-C-C-T	8.03483e-07	SGK1
1485	SMARCD1 28.0 Intron	7.58002e-05	SMARCD1	TP53 137.0 Non_Silent	1.32281e-05	TP53	SPOP 482.0 Intron	5.61156e-05	SPOP	RARA 951.0 UTR	7.71239e-07	RARA	MAX Flank	2.10937e-12	MAX	125316540-125316540-chr4-Synonymous-SNP-C-C-G	7.92106e-07	FAT4
1486	ATP2B3 Synonymous	7.57441e-05	ATP2B3	IL6ST Non_Silent	1.32167e-05	IL6ST	175127253-175127253-chr1-Intron-SNP-C-C-T	5.61083e-05	TNN	27196939-27196940-chr7-3'UTR-DEL-TT-TT--	7.67056e-07	HOXA13	CDH17 Flank	1.53071e-12	CDH17	133753650-133753650-chrX-Synonymous-SNP-A-A-C	7.63286e-07	GPC3
1487	APC Synonymous	7.57125e-05	APC	14158600-14158600-chr3-Missense_Mutation-SNP-A-A-C	1.31855e-05	XPC	RD3 Intron	5.58735e-05	RD3	CARD11 1050.0 UTR	7.65168e-07	CARD11	NOTCH1 Flank	1.3136e-12	NOTCH1	195781545-195781545-chr3-Synonymous-SNP-C-C-A	5.80542e-07	MUC4
1488	77320210-77320212-chr17-Intron-DEL-GAG-GAG--	7.56116e-05	SEPT9	106432936-106432936-chr2-Missense_Mutation-SNP-T-T-A	1.30504e-05	RGPD3	CDK1 Intron	5.55111e-05	CDK1	PRF1 12.0 UTR	7.55062e-07	PRF1	PDGFRA Flank	1.17121e-12	PDGFRA	TEC 113.0 Synonymous	5.53641e-07	TEC
1489	256463-256463-chr5-3'UTR-SNP-T-T-C	7.55722e-05	SDHA	3728400-3728402-chr16-In_Frame_Del-DEL-TGC-TGC--	1.30288e-05	CREBBP	CP 253.0 Intron	5.55018e-05	CP	28923681-28923681-chr6-5'UTR-SNP-T-T-C	7.52301e-07	TRIM27	DDX10 Flank	8.39292e-13	DDX10	DRG1 Synonymous	5.39563e-07	DRG1
1490	29944102-29944102-chr6-Intron-SNP-T-T-G	7.53481e-05	HLA-A	MUC16 943.0 Non_Silent	1.29314e-05	MUC16	TPM4 234.0 Intron	5.52963e-05	TPM4	PRPF4 1.0 UTR	7.49281e-07	PRPF4	SOCS1 37.0 Flank	6.2721e-13	SOCS1	179108662-179108662-chr1-Synonymous-SNP-G-G-A	5.37523e-07	ABL2
1491	8896139-8896139-chr19-Intron-SNP-T-T-A	7.52297e-05	MUC16	171400153-171400155-chr5-In_Frame_Del-DEL-TGA-TGA--	1.28773e-05	NPM1	RECQL4 39.0 Intron	5.51045e-05	RECQL4	TBX3 260.0 UTR	7.46982e-07	TBX3	MT3 Flank	3.19775e-13	MT3	WHSC1L1 1562.0 Synonymous	5.34882e-07	WHSC1L1
1492	TAL1 Intron	7.51891e-05	TAL1	1615813-1615813-chr19-Missense_Mutation-SNP-G-G-C	1.28423e-05	TCF3	LPP 5991.0 Intron	5.49576e-05	LPP	DGCR8 600.0 UTR	7.33323e-07	DGCR8	ERCC4 645.0 Flank	2.52156e-13	ERCC4	71291927-71291927-chrX-Synonymous-SNP-C-C-G	4.96513e-07	NONO
1493	KAT6B 3911.0 Non_Silent	7.51646e-05	KAT6B	AFF4 1181.0 Non_Silent	1.28056e-05	AFF4	TSC2 494.0 Intron	5.47722e-05	TSC2	57096317-57096317-chr12-3'UTR-SNP-T-T-C	7.31009e-07	STAT6	CDK1 Flank	1.44017e-13	CDK1	MUC4 727.0 Synonymous	4.65579e-07	MUC4
1494	LRP1 1447.0 Intron	7.50508e-05	LRP1	136518759-136518759-chr9-Missense_Mutation-SNP-T-T-G	1.27943e-05	NOTCH1	CASP8 1060.0 Intron	5.37831e-05	CASP8	HMGA2 2786.0 UTR	7.29042e-07	HMGA2	RAN 86.0 Flank	1.39515e-13	RAN	IL6ST Synonymous	4.59802e-07	IL6ST
1495	CCNC UTR	7.49873e-05	CCNC	CEBPA 33.0 Non_Silent	1.2756e-05	CEBPA	LAT Intron	5.36625e-05	LAT	118898318-118898318-chr11-3'UTR-SNP-A-A-C	7.27373e-07	BCL9L	190179484-190179484-chr4-3'Flank-SNP-G-G-A	1.20387e-13	DUX4	MUT 553.0 Synonymous	4.50885e-07	MUT
1496	130884103-130884105-chr9-In_Frame_Del-DEL-AAG-AAG--	7.49575e-05	ABL1	AIP Non_Silent	1.25975e-05	AIP	FANCD2 456.0 Intron	5.36373e-05	FANCD2	FUS 2.0 UTR	7.25935e-07	FUS	190179533-190179533-chr4-3'Flank-SNP-A-A-G	1.11026e-13	DUX4	IDH1 Synonymous	4.49043e-07	IDH1
1497	JAK3 341.0 Intron	7.48458e-05	JAK3	BIRC3 374.0 Non_Silent	1.25431e-05	BIRC3	81096719-81096719-chr14-Intron-SNP-G-G-T	5.35605e-05	TSHR	HIC2 588.0 UTR	7.23911e-07	HIC2	MGA 0.0 Flank	9.15295e-14	MGA	33859470-33859470-chr11-Synonymous-SNP-T-T-C	4.44734e-07	LMO2
1498	PICALM Intron	7.47347e-05	PICALM	HLA-A 31.0 Non_Silent	1.25341e-05	HLA-A	MET 1710.0 Intron	5.33958e-05	MET	EGFR 3732.0 UTR	7.21963e-07	EGFR	T Flank	3.39135e-14	T	LHFP 5160.0 Synonymous	4.40614e-07	LHFP
1499	TRIM24 UTR	7.46278e-05	TRIM24	PDE4DIP 1565.0 Non_Silent	1.24065e-05	PDE4DIP	91513890-91513890-chr1-Intron-SNP-C-C-A	5.31191e-05	CDC7	61683138-61683138-chr17-3'UTR-SNP-A-A-G	7.18234e-07	BRIP1	RALGDS 0.0 Flank	2.87982e-14	RALGDS	MUC16 2291.0 Synonymous	4.11407e-07	MUC16
1500	SETBP1 Synonymous	7.43154e-05	SETBP1	NOTCH1 336.0 Non_Silent	1.23965e-05	NOTCH1	TNN 1580.0 Intron	5.30776e-05	TNN	118897758-118897758-chr11-3'UTR-DEL-T-T--	7.17655e-07	BCL9L	P2RY8 Flank	1.77911e-14	P2RY8	49039263-49039263-chr12-Synonymous-SNP-T-T-G	3.97369e-07	KMT2D
1501	NFKB2 Non_Silent	7.42442e-05	NFKB2	236566-236566-chr5-Missense_Mutation-SNP-T-T-A	1.23819e-05	SDHA	MUC16 2417.0 Intron	5.28343e-05	MUC16	BLM 1962.0 UTR	7.0905e-07	BLM	FAM135B Flank	1.36793e-14	FAM135B	MLLT10 91.0 Synonymous	3.76795e-07	MLLT10
1502	EXT1 Intron	7.42354e-05	EXT1	SOX2 Non_Silent	1.23334e-05	SOX2	157174893-157174893-chr6-Intron-SNP-A-A-C	5.26916e-05	ARID1B	EPAS1 1747.0 UTR	7.04314e-07	EPAS1	FCRL4 Flank	5.84452e-15	FCRL4	79711843-79711843-chr10-Synonymous-SNP-A-A-G	3.50581e-07	NUTM2B
1503	CRTC3 Intron	7.41113e-05	CRTC3	MB21D2 Non_Silent	1.22963e-05	MB21D2	EPAS1 1175.0 Intron	5.26018e-05	EPAS1	TNFAIP3 280.0 UTR	7.00332e-07	TNFAIP3				195785409-195785409-chr3-Synonymous-SNP-T-T-A	3.34582e-07	MUC4
1504	CHD7 Intron	7.40999e-05	CHD7	HSP90AB1 121.0 Non_Silent	1.22298e-05	HSP90AB1	116769622-116769625-chr7-Intron-DEL-TTTT-TTTT--	5.24418e-05	MET	FGFR2 30.0 UTR	6.99565e-07	FGFR2				EPHA7 365.0 Synonymous	3.12306e-07	EPHA7
1505	PRCC Synonymous	7.40576e-05	PRCC	HIP1 406.0 Non_Silent	1.21394e-05	HIP1	106683420-106683420-chr8-Intron-SNP-C-C-T	5.17127e-05	OXR1	ECT2L 2132.0 UTR	6.95731e-07	ECT2L				ERC1 2420.0 Synonymous	3.10759e-07	ERC1
1506	147620546-147620546-chr1-Missense_Mutation-SNP-G-G-T	7.39611e-05	BCL9	CNBD1 Non_Silent	1.20914e-05	CNBD1	57200838-57200838-chr12-Intron-SNP-T-T-C	5.16345e-05	LRP1	8683712-8683714-chr2-3'UTR-DEL-ACA-ACA--	6.92556e-07	ID2				EPHA7 2365.0 Synonymous	2.99946e-07	EPHA7
1507	PBX1 5213.0 Intron	7.39191e-05	PBX1	PTPRK 541.0 Non_Silent	1.20874e-05	PTPRK	154366306-154366306-chrX-Splice_Site-SNP-A-A-C	5.16322e-05	FLNA	22115460-22115460-chr8-3'UTR-SNP-G-G-T	6.91046e-07	HR				ATP1A1 554.0 Synonymous	2.90912e-07	ATP1A1
1508	FNBP1 Intron	7.39045e-05	FNBP1	NUP98 93.0 Non_Silent	1.20544e-05	NUP98	SETD2 1785.0 Intron	5.15034e-05	SETD2	SIRPA 858.0 UTR	6.84317e-07	SIRPA				8952842-8952842-chr19-Synonymous-SNP-A-A-G	2.73709e-07	MUC16
1509	RPL22 Intron	7.38398e-05	RPL22	PTPN1 Non_Silent	1.20205e-05	PTPN1	15599479-15599479-chr2-Intron-SNP-G-G-T	5.13997e-05	DDX1	ZBTB16 3822.0 UTR	6.82886e-07	ZBTB16				74361571-74361571-chr2-Synonymous-SNP-A-A-C	2.72734e-07	DCTN1
1510	118900576-118900579-chr11-Intron-DEL-GCCT-GCCT--	7.3824e-05	BCL9L	2170713-2170715-chr16-In_Frame_Del-DEL-GAG-GAG--	1.20114e-05	TRAF7	41661466-41661466-chr8-Intron-SNP-T-T-G	5.13096e-05	ANK1	TSHR 12.0 UTR	6.80987e-07	TSHR				NONO 167.0 Synonymous	2.56469e-07	NONO
1511	256547-256547-chr5-3'UTR-SNP-A-A-G	7.34693e-05	SDHA	PRKACA Non_Silent	1.19735e-05	PRKACA	RP1 Intron	5.1159e-05	RP1	39223530-39223531-chr22-3'UTR-DEL-TG-TG--	6.80018e-07	PDGFB				NUTM2B 173.0 Synonymous	2.52732e-07	NUTM2B
1512	100709214-100709214-chr8-Missense_Mutation-SNP-G-G-A	7.34193e-05	PABPC1	CD2 Non_Silent	1.19656e-05	CD2	47791155-47791156-chr2-Intron-DEL-TG-TG--	5.10837e-05	MSH6	157575441-157575441-chr1-3'UTR-SNP-G-G-T	6.78293e-07	FCRL4				MUC4 744.0 Synonymous	2.35255e-07	MUC4
1513	MLF1 Intron	7.3319e-05	MLF1	PRPF4 Non_Silent	1.18488e-05	PRPF4	PIK3CB 1242.0 Intron	5.08105e-05	PIK3CB	PER1 10.0 UTR	6.76141e-07	PER1				RANBP2 711.0 Synonymous	2.30802e-07	RANBP2
1514	53666432-53666432-chr3-Missense_Mutation-SNP-T-T-G	7.3254e-05	CACNA1D	FAT1 509.0 Non_Silent	1.17836e-05	FAT1	6679370-6679370-chr19-Intron-SNP-G-G-T	5.05109e-05	C3	98881095-98881095-chr7-5'UTR-SNP-T-T-G	6.7314e-07	TRRAP				149028661-149028661-chr1-Synonymous-SNP-G-G-A	2.24129e-07	PDE4DIP
1515	102287379-102287380-chr8-Intron-DEL-AC-AC--	7.31592e-05	UBR5	68192488-68192488-chr8-Missense_Mutation-SNP-G-G-C	1.17768e-05	PREX2	172783653-172783653-chr3-Intron-SNP-A-A-C	5.04411e-05	ECT2	FAM135B 49.0 UTR	6.71477e-07	FAM135B				87228550-87228550-chr10-Synonymous-SNP-C-C-T	2.21108e-07	NUTM2A
1516	KDR Non_Silent	7.30061e-05	KDR	57175909-57175909-chr12-Missense_Mutation-SNP-A-A-C	1.17535e-05	LRP1	188524909-188524909-chr3-Intron-SNP-T-T-G	5.04021e-05	LPP	PRKAR1A 370.0 UTR	6.55827e-07	PRKAR1A				EGFR 2552.0 Synonymous	2.14447e-07	EGFR
1517	SMARCD1 Intron	7.27038e-05	SMARCD1	KIAA1549 1621.0 Non_Silent	1.16699e-05	KIAA1549	CDH10 1013.0 Intron	5.02427e-05	CDH10	169663413-169663413-chr3-5'UTR-DEL-T-T--	6.51292e-07	MECOM				PTPRK 2255.0 Synonymous	2.1276e-07	PTPRK
1518	CDH1 Intron	7.26586e-05	CDH1	114425494-114425496-chr1-In_Frame_Del-DEL-TGT-TGT--	1.16498e-05	TRIM33	116769622-116769624-chr7-Intron-DEL-TTT-TTT--	5.01068e-05	MET	EPHA7 3588.0 UTR	6.44361e-07	EPHA7				HNF1A 380.0 Synonymous	1.90362e-07	HNF1A
1519	CCNB1 UTR	7.25734e-05	CCNB1	KIAA1598 Non_Silent	1.1597e-05	KIAA1598	117159909-117159910-chr11-Intron-DEL-TT-TT--	5.00523e-05	PAFAH1B2	CACNA1D 7.0 UTR	6.42813e-07	CACNA1D				29942956-29942956-chr6-Synonymous-SNP-G-G-C	1.85123e-07	HLA-A
1520	92883322-92883322-chr11-Missense_Mutation-SNP-T-T-C	7.25425e-05	FAT3	8962299-8962299-chr19-Missense_Mutation-SNP-G-G-A	1.15432e-05	MUC16	APOB 271.0 Intron	4.98788e-05	APOB	CACNA1D 6336.0 UTR	6.38787e-07	CACNA1D				TSHR 3771.0 Synonymous	1.83623e-07	TSHR
1521	BRD3 Intron	7.25166e-05	BRD3	LHFP Non_Silent	1.1528e-05	LHFP	6709619-6709619-chr19-Intron-SNP-A-A-C	4.9687e-05	C3	CCR4 81.0 UTR	6.37675e-07	CCR4				116400922-116400922-chr1-Synonymous-SNP-C-C-T	1.78048e-07	ATP1A1
1522	29944103-29944103-chr6-Intron-SNP-T-T-A	7.24158e-05	HLA-A	140501830-140501830-chr2-Missense_Mutation-SNP-A-A-C	1.15134e-05	LRP1B	CDK4 Intron	4.95916e-05	CDK4	47147412-47147412-chrX-5'UTR-SNP-T-T-G	6.28613e-07	RBM10				85477174-85477174-chr8-Synonymous-SNP-T-T-C	1.69355e-07	CA2
1523	BUB1B Intron	7.24073e-05	BUB1B	CCR7 Non_Silent	1.14537e-05	CCR7	TSHR 3067.0 Intron	4.91841e-05	TSHR	53486094-53486094-chr5-3'UTR-SNP-G-G-A	6.27261e-07	FST				108755015-108755015-chr2-Synonymous-SNP-A-A-G	1.5764e-07	RANBP2
1524	27963400-27963400-chr13-Intron-SNP-T-T-G	7.23598e-05	CDX2	31358988-31358988-chr17-Missense_Mutation-SNP-G-G-T	1.14129e-05	NF1	LARP4 1233.0 Intron	4.90396e-05	LARP4	156139185-156139185-chr1-3'UTR-SNP-G-G-C	6.24084e-07	LMNA				29943542-29943542-chr6-Splice_Region-SNP-G-G-T	1.52311e-07	HLA-A
1525	MLH1 Intron	7.23361e-05	MLH1	179234297-179234297-chr3-Missense_Mutation-SNP-A-A-G	1.13741e-05	PIK3CA	29944013-29944013-chr6-Intron-SNP-T-T-C	4.90323e-05	HLA-A	MLLT6 2.0 UTR	6.23875e-07	MLLT6				LPP 10697.0 Synonymous	1.40033e-07	LPP
1526	100704967-100704967-chr8-Missense_Mutation-SNP-G-G-C	7.22703e-05	PABPC1	HOOK3 1070.0 Non_Silent	1.13349e-05	HOOK3	EGFR 2484.0 Intron	4.88794e-05	EGFR	RARA 950.0 UTR	6.17756e-07	RARA				81143552-81143552-chr14-Synonymous-SNP-T-T-G	1.30371e-07	TSHR
1527	CTNNA2 5161.0 Intron	7.2221e-05	CTNNA2	BIRC3 373.0 Non_Silent	1.1222e-05	BIRC3	DCD Intron	4.87296e-05	DCD	CARS 3.0 UTR	6.14603e-07	CARS				PRKACA 303.0 Synonymous	1.29503e-07	PRKACA
1528	RDM1 Intron	7.20292e-05	RDM1	77477462-77477462-chr3-Missense_Mutation-SNP-C-C-G	1.12167e-05	ROBO2	64809482-64809482-chr11-Intron-SNP-C-C-T	4.85553e-05	MEN1	CHST1 15.0 UTR	6.07863e-07	CHST1				195783915-195783915-chr3-Synonymous-SNP-T-T-G	1.24436e-07	MUC4
1529	HOXA1 Synonymous	7.18734e-05	HOXA1	CDKN1A 112.0 Non_Silent	1.11963e-05	CDKN1A	18450425-18450425-chr19-Intron-SNP-T-T-G	4.8439e-05	ELL	56932231-56932233-chr16-5'UTR-DEL-CCG-CCG--	6.06787e-07	HERPUD1				TBL1XR1 Synonymous	1.22884e-07	TBL1XR1
1530	115040907-115040908-chr9-Intron-DEL-AC-AC--	7.17941e-05	TNC	CTNND1 598.0 Non_Silent	1.11819e-05	CTNND1	CD274 Intron	4.84038e-05	CD274	BLM 1960.0 UTR	6.06286e-07	BLM				149028631-149028631-chr1-Synonymous-SNP-A-A-G	1.20532e-07	PDE4DIP
1531	SP1 Intron	7.16436e-05	SP1	NUTM1 212.0 Non_Silent	1.11088e-05	NUTM1	EGF 934.0 Intron	4.82726e-05	EGF	118898304-118898304-chr11-3'UTR-SNP-A-A-C	5.97383e-07	BCL9L				ESR1 8.0 Synonymous	1.18683e-07	ESR1
1532	GATA3 Non_Silent	7.16305e-05	GATA3	XPA Non_Silent	1.10573e-05	XPA	534410-534415-chr11-Intron-DEL-CCCAGC-CCCAGC--	4.81338e-05	HRAS	56080107-56080108-chr12-5'UTR-DEL-CA-CA--	5.96242e-07	ERBB3				57810181-57810181-chr11-Synonymous-SNP-G-G-A	1.18599e-07	CTNND1
1533	STIL Intron	7.14931e-05	STIL	PARG 2301.0 Non_Silent	1.1027e-05	PARG	149185102-149185104-chr3-Intron-DEL-TTG-TTG--	4.80855e-05	CP	ATP1A1 5.0 UTR	5.95724e-07	ATP1A1				24758060-24758060-chr2-Synonymous-SNP-T-T-G	1.1697e-07	NCOA1
1534	152265172-152265172-chr7-Synonymous-SNP-C-C-T	7.14498e-05	KMT2C	186708384-186708384-chr4-Missense_Mutation-SNP-C-C-T	1.09893e-05	FAT1	CCND2 Intron	4.79949e-05	CCND2	ETNK1 1199.0 UTR	5.94249e-07	ETNK1				TFE3 210.0 Synonymous	1.12394e-07	TFE3
1535	RNF4 Intron	7.13958e-05	RNF4	SLC45A3 84.0 Non_Silent	1.09675e-05	SLC45A3	8896121-8896121-chr19-Intron-SNP-T-T-C	4.75179e-05	MUC16	JUN 18.0 UTR	5.90908e-07	JUN				SOX2 22.0 Synonymous	1.04239e-07	SOX2
1536	100744808-100744809-chr3-Intron-DEL-TG-TG--	7.13623e-05	TFG	128912201-128912201-chr11-Missense_Mutation-SNP-G-G-A	1.09538e-05	KCNJ5	SDHD Intron	4.74795e-05	SDHD	122060894-122060894-chr12-3'UTR-DEL-A-A--	5.84957e-07	BCL7A				179109038-179109038-chr1-Synonymous-SNP-A-A-C	1.02812e-07	ABL2
1537	SIRPA Intron	7.11e-05	SIRPA	MYH9 141.0 Non_Silent	1.09165e-05	MYH9	42207488-42207495-chr17-Intron-DEL-CACACACA-CACACACA--	4.72283e-05	STAT5B	XPC 669.0 UTR	5.80004e-07	XPC				181713020-181713020-chr3-Synonymous-SNP-G-G-C	1.01921e-07	SOX2
1538	FANCC Intron	7.09119e-05	FANCC	FAT1 510.0 Non_Silent	1.08921e-05	FAT1	110649148-110649149-chr2-Intron-DEL-CA-CA--	4.67446e-05	BUB1	104457334-104457334-chr12-5'UTR-SNP-T-T-C	5.64598e-07	CHST11				CTNND1 968.0 Synonymous	1.00871e-07	CTNND1
1539	TCF7L2 4046.0 Intron	7.08347e-05	TCF7L2	8886806-8886806-chr19-Missense_Mutation-SNP-C-C-T	1.08741e-05	MUC16	ZCCHC8 Intron	4.67033e-05	ZCCHC8	DCTN1 6.0 UTR	5.59456e-07	DCTN1				2906827-2906827-chr7-Synonymous-SNP-T-T-C	1.00231e-07	CARD11
1540	SF3B1 Non_Silent	7.06238e-05	SF3B1	APOBEC3B 72.0 Non_Silent	1.08733e-05	APOBEC3B	ARHGEF1 204.0 Intron	4.66168e-05	ARHGEF1	SRGAP3 91.0 UTR	5.59258e-07	SRGAP3				23311832-23311832-chr22-Synonymous-SNP-C-C-T	9.8986e-08	BCR
1541	152238746-152238746-chr7-Synonymous-SNP-G-G-A	7.04835e-05	KMT2C	ROBO2 8752.0 Non_Silent	1.08622e-05	ROBO2	CREB1 Intron	4.65499e-05	CREB1	KAT6A 44.0 UTR	5.57209e-07	KAT6A				8963375-8963375-chr19-Synonymous-SNP-A-A-G	9.69889e-08	MUC16
1542	PC Non_Silent	7.04651e-05	PC	CLP1 Non_Silent	1.08169e-05	CLP1	KIT 1385.0 Intron	4.65208e-05	KIT	26017997-26017997-chr18-3'UTR-SNP-G-G-A	5.55981e-07	SS18				SPECC1 3204.0 Synonymous	9.07127e-08	SPECC1
1543	APOB 562.0 Intron	7.00303e-05	APOB	FIBP 12.0 Non_Silent	1.07681e-05	FIBP	152273625-152273625-chr7-Intron-SNP-C-C-A	4.6459e-05	KMT2C	ASXL2 2892.0 UTR	5.54936e-07	ASXL2				195783105-195783105-chr3-Synonymous-SNP-C-C-T	8.98452e-08	MUC4
1544	28986818-28986818-chr16-Missense_Mutation-SNP-A-A-C	7.00035e-05	LAT	WWP2 2516.0 Non_Silent	1.07667e-05	WWP2	10048241-10048241-chr3-Intron-SNP-G-G-A	4.59997e-05	FANCD2	18027863-18027865-chr8-3'UTR-DEL-TTT-TTT--	5.42602e-07	PCM1				ACVR2A 1101.0 Synonymous	8.72468e-08	ACVR2A
1545	NACA 121.0 Intron	6.99365e-05	NACA	KMT2D 150.0 Non_Silent	1.07387e-05	KMT2D	TK1 Intron	4.57917e-05	TK1	CLIP1 2153.0 UTR	5.42069e-07	CLIP1				SMARCA4 1984.0 Synonymous	8.71873e-08	SMARCA4
1546	MECOM 617.0 Synonymous	6.99332e-05	MECOM	100712696-100712696-chr8-Missense_Mutation-SNP-G-G-A	1.07339e-05	PABPC1	10046558-10046558-chr3-Intron-SNP-G-G-A	4.57194e-05	FANCD2	RHOH 929.0 UTR	5.36361e-07	RHOH				124402547-124402547-chr12-Synonymous-SNP-C-C-T	8.41226e-08	NCOR2
1547	7669662-7669662-chr17-Missense_Mutation-SNP-T-T-G	6.9844e-05	TP53	26192530-26192530-chr7-Missense_Mutation-SNP-T-T-C	1.06702e-05	HNRNPA2B1	TG 823.0 Intron	4.5674e-05	TG	PABPC1 3.0 UTR	5.35078e-07	PABPC1				PRPF4 252.0 Synonymous	8.2032e-08	PRPF4
1548	KL Non_Silent	6.97895e-05	KL	CDK12 1375.0 Non_Silent	1.05833e-05	CDK12	NF1 2230.0 Intron	4.56182e-05	NF1	41347847-41347847-chrX-3'UTR-DEL-T-T--	5.29788e-07	DDX3X				MUC4 795.0 Synonymous	7.83315e-08	MUC4
1549	LRP1B 15250.0 Intron	6.97558e-05	LRP1B	195786302-195786302-chr3-Missense_Mutation-SNP-G-G-A	1.05256e-05	MUC4	FNBP1 254.0 Intron	4.55288e-05	FNBP1	PSD 289.0 UTR	5.27614e-07	PSD				39601100-39601100-chr13-Synonymous-SNP-G-G-T	7.8191e-08	LHFP
1550	POLD1 645.0 Intron	6.97434e-05	POLD1	ATF1 Non_Silent	1.05028e-05	ATF1	NOTCH2 227.0 Intron	4.5466e-05	NOTCH2	138586000-138586000-chr7-3'UTR-DEL-T-T--	5.24326e-07	TRIM24				CDKN2A 141.0 Synonymous	7.0226e-08	CDKN2A
1551	LRP1B 4261.0 Intron	6.97037e-05	LRP1B	57166092-57166092-chr12-Missense_Mutation-SNP-A-A-C	1.03827e-05	LRP1	CDKN2A Intron	4.49597e-05	CDKN2A	SLC45A3 138.0 UTR	5.2168e-07	SLC45A3				1112286-1112286-chr12-Synonymous-SNP-T-T-G	6.96349e-08	ERC1
1552	SDHA 764.0 UTR	6.96217e-05	SDHA	KAT6B 4084.0 Non_Silent	1.03729e-05	KAT6B	49453534-49453535-chr6-Intron-DEL-AT-AT--	4.49482e-05	MUT	6444924-6444924-chr12-5'UTR-DEL-A-A--	5.1777e-07	CD27				197418581-197418581-chr2-Synonymous-SNP-T-T-C	6.81305e-08	SF3B1
1553	FAT3 Synonymous	6.96095e-05	FAT3	CUX1 7589.0 Non_Silent	1.03543e-05	CUX1	49633381-49633381-chr12-Intron-SNP-A-A-G	4.49264e-05	PRPF40B	NUTM2A 190.0 UTR	5.17525e-07	NUTM2A				SPOP Synonymous	6.78484e-08	SPOP
1554	POU5F1 Intron	6.95164e-05	POU5F1	ARC Non_Silent	1.03538e-05	ARC	32976351-32976351-chr7-Splice_Region-SNP-C-C-T	4.49236e-05	FKBP9	130066644-130066644-chrX-3'UTR-SNP-T-T-G	5.17469e-07	ELF4				LMO2 18.0 Synonymous	6.60649e-08	LMO2
1555	USP6 Synonymous	6.95049e-05	USP6	CCND3 23.0 Non_Silent	1.02947e-05	CCND3	47565414-47565414-chrX-Intron-SNP-C-C-G	4.48123e-05	ARAF	RGPD3 2.0 UTR	5.16895e-07	RGPD3				ZCCHC8 52.0 Synonymous	6.2953e-08	ZCCHC8
1556	RDM1 Flank	6.94943e-05	RDM1	GATA1 Non_Silent	1.02846e-05	GATA1	PTPN11 1390.0 Intron	4.47599e-05	PTPN11	176107333-176107333-chr2-5'UTR-SNP-G-G-C	5.15719e-07	HOXD11				13637703-13637703-chr3-Synonymous-SNP-G-G-A	6.28193e-08	FBLN2
1557	PAFAH1B2 313.0 Intron	6.93145e-05	PAFAH1B2	100721442-100721442-chr8-Missense_Mutation-SNP-T-T-G	1.02656e-05	PABPC1	BCR 2652.0 Intron	4.47016e-05	BCR	166158065-166158065-chr6-3'UTR-SNP-A-A-G	5.13527e-07	T				TAF15 710.0 Synonymous	6.12017e-08	TAF15
1558	CBLB 1571.0 Intron	6.92776e-05	CBLB	60461400-60461402-chr2-In_Frame_Del-DEL-CTC-CTC--	1.0262e-05	BCL11A	ARNT 156.0 Intron	4.46618e-05	ARNT	GATA3 390.0 UTR	5.0921e-07	GATA3				35844925-35844925-chr17-Synonymous-SNP-T-T-G	6.10796e-08	TAF15
1559	TG 1330.0 Intron	6.92066e-05	TG	RUNX1T1 1004.0 Non_Silent	1.01297e-05	RUNX1T1	55773985-55773985-chr6-Intron-SNP-C-C-A	4.44481e-05	BMP5	17018722-17018722-chr1-3'UTR-DEL-T-T--	5.0783e-07	SDHB				PTCH1 694.0 Synonymous	6.02198e-08	PTCH1
1560	CDC6 Intron	6.91905e-05	CDC6	AXIN2 182.0 Non_Silent	1.00944e-05	AXIN2	TET1 1440.0 Intron	4.4443e-05	TET1	108665065-108665065-chr11-5'UTR-SNP-C-C-T	5.05116e-07	DDX10				195785391-195785391-chr3-Synonymous-SNP-C-C-G	5.81024e-08	MUC4
1561	10073589-10073589-chr3-Intron-SNP-G-G-A	6.89005e-05	FANCD2	44253579-44253579-chr6-Missense_Mutation-SNP-G-G-A	1.00667e-05	HSP90AB1	175080537-175080537-chr1-Intron-SNP-A-A-C	4.43898e-05	TNN	RGPD3 1267.0 UTR	5.04506e-07	RGPD3				SMARCD1 Synonymous	5.62089e-08	SMARCD1
1562	AR Intron	6.88638e-05	AR	KMT2D 656.0 Non_Silent	1.00308e-05	KMT2D	6843048-6843051-chr19-Intron-DEL-TGAA-TGAA--	4.43769e-05	VAV1	PTPN1 1449.0 UTR	5.04468e-07	PTPN1				71252710-71252710-chrX-Synonymous-SNP-C-C-G	5.59359e-08	ZMYM3
1563	127289368-127289370-chr2-In_Frame_Del-DEL-TCT-TCT--	6.87904e-05	ERCC3	NAB2 62.0 Non_Silent	1.00181e-05	NAB2	PPM1D Intron	4.43694e-05	PPM1D	27449459-27449460-chr16-3'UTR-DEL-TG-TG--	4.99982e-07	IL21R				29228933-29228933-chr2-Synonymous-SNP-T-T-C	5.52582e-08	ALK
1564	FUBP1 167.0 Intron	6.87845e-05	FUBP1	S100A7 Non_Silent	1.00106e-05	S100A7	101136678-101136678-chr10-Intron-SNP-G-G-T	4.42854e-05	TLX1	137875085-137875086-chr7-3'UTR-DEL-TT-TT--	4.99312e-07	CREB3L2				SBDS 71.0 Synonymous	5.51693e-08	SBDS
1565	MAP2 2339.0 Intron	6.87513e-05	MAP2	POLE 50.0 Non_Silent	9.99699e-06	POLE	RSPO3 Intron	4.42027e-05	RSPO3	HOXA1 28.0 UTR	4.95089e-07	HOXA1				HOXD13 5.0 Synonymous	5.39286e-08	HOXD13
1566	136496493-136496495-chr9-In_Frame_Del-DEL-GTG-GTG--	6.86728e-05	NOTCH1	RHO Non_Silent	9.96968e-06	RHO	LARP4 1234.0 Intron	4.41223e-05	LARP4	117288366-117288366-chr6-3'UTR-SNP-A-A-G	4.94668e-07	ROS1				BCL7A 745.0 Synonymous	5.24518e-08	BCL7A
1567	CSF1R 86.0 Synonymous	6.84261e-05	CSF1R	B2M Non_Silent	9.82464e-06	B2M	HOXA9 Intron	4.39453e-05	HOXA9	61478795-61478795-chr2-3'UTR-DEL-A-A--	4.9217e-07	XPO1				NSD1 1520.0 Synonymous	5.23454e-08	NSD1
1568	69879314-69879314-chr3-Synonymous-SNP-A-A-C	6.84192e-05	MITF	PDCD1 Non_Silent	9.80353e-06	PDCD1	CSF3R 45.0 Intron	4.38775e-05	CSF3R	40393649-40393649-chr15-3'UTR-SNP-A-A-G	4.90708e-07	KNSTRN				64988211-64988211-chr16-Synonymous-SNP-C-C-T	5.20443e-08	CDH11
1569	BCL9L 321.0 Intron	6.83832e-05	BCL9L	KCNJ5 415.0 Non_Silent	9.78374e-06	KCNJ5	169550068-169550071-chr1-Intron-DEL-AATA-AATA--	4.38196e-05	F5	ZNF2 337.0 UTR	4.90032e-07	ZNF2				209695122-209695122-chr2-Synonymous-SNP-T-T-G	5.15858e-08	MAP2
1570	PABPC1 198.0 Non_Silent	6.82814e-05	PABPC1	HOXA11 69.0 Non_Silent	9.7836e-06	HOXA11	149030031-149030031-chr1-Intron-SNP-T-T-G	4.37524e-05	PDE4DIP	35085783-35085783-chr22-3'UTR-SNP-T-T-C	4.88947e-07	ISX				NBN 443.0 Synonymous	5.10862e-08	NBN
1571	100709705-100709705-chr8-Frame_Shift_Del-DEL-T-T--	6.80846e-05	PABPC1	TAT Non_Silent	9.77452e-06	TAT	CD79A Intron	4.34615e-05	CD79A	MSN 1445.0 UTR	4.84777e-07	MSN				ASXL1 1563.0 Synonymous	4.98458e-08	ASXL1
1572	TNFAIP3 Non_Silent	6.78899e-05	TNFAIP3	PWWP2A Non_Silent	9.77314e-06	PWWP2A	10073589-10073589-chr3-Intron-SNP-G-G-A	4.33431e-05	FANCD2	SS18 35.0 UTR	4.83051e-07	SS18				8910420-8910420-chr19-Synonymous-SNP-G-G-A	4.84157e-08	MUC16
1573	MYC Non_Silent	6.78509e-05	MYC	SMAD2 Non_Silent	9.75331e-06	SMAD2	ABL2 2450.0 Intron	4.33386e-05	ABL2	SLC45A3 27.0 UTR	4.82568e-07	SLC45A3				195785376-195785376-chr3-Synonymous-SNP-A-A-G	4.82875e-08	MUC4
1574	FAH 8.0 Intron	6.7837e-05	FAH	KCNJ5 Non_Silent	9.72084e-06	KCNJ5	GPHN 8313.0 Intron	4.30289e-05	GPHN	CHST11 8.0 UTR	4.79026e-07	CHST11				33393339-33393339-chr3-Synonymous-SNP-G-G-A	4.70486e-08	UBP1
1575	TCF3 Non_Silent	6.77625e-05	TCF3	SPEN 1686.0 Non_Silent	9.67324e-06	SPEN	ATR 2186.0 Intron	4.26015e-05	ATR	100702943-100702943-chr8-3'UTR-SNP-A-A-T	4.77667e-07	PABPC1				31170594-31170594-chr6-Synonymous-SNP-G-G-A	4.65391e-08	POU5F1
1576	LRP1B 2786.0 Intron	6.77256e-05	LRP1B	AK2 475.0 Non_Silent	9.66416e-06	AK2	10034307-10034307-chr3-Intron-SNP-A-A-G	4.25618e-05	FANCD2	11350859-11350859-chr16-3'UTR-SNP-A-A-G	4.73275e-07	RMI2				SF3B1 576.0 Synonymous	4.63309e-08	SF3B1
1577	147486029-147486029-chr7-Missense_Mutation-SNP-A-A-C	6.7629e-05	CNTNAP2	STAT3 409.0 Non_Silent	9.64604e-06	STAT3	LRP1B 10793.0 Intron	4.24439e-05	LRP1B	SFRP4 213.0 UTR	4.72929e-07	SFRP4				128082600-128082600-chr6-Synonymous-SNP-A-A-G	4.57526e-08	PTPRK
1578	POLG 217.0 Intron	6.7609e-05	POLG	LEF1 2404.0 Non_Silent	9.61668e-06	LEF1	8896093-8896093-chr19-Splice_Region-SNP-A-A-C	4.22093e-05	MUC16	189631458-189631458-chr3-5'UTR-SNP-A-A-T	4.67133e-07	TP63				55146655-55146655-chr7-Synonymous-SNP-C-C-T	4.31424e-08	EGFR
1579	5130313-5130313-chr17-Intron-SNP-T-T-G	6.76028e-05	USP6	104775736-104775738-chr14-In_Frame_Del-DEL-CTC-CTC--	9.61659e-06	AKT1	MAL Intron	4.21986e-05	MAL	100703052-100703058-chr8-3'UTR-DEL-AAAGGAA-AAAGGAA--	4.61939e-07	PABPC1				BAP1 72.0 Synonymous	4.21137e-08	BAP1
1580	CER1 Non_Silent	6.75236e-05	CER1	SMARCA4 1481.0 Non_Silent	9.60761e-06	SMARCA4	KIT 1405.0 Intron	4.20548e-05	KIT	6402512-6402512-chr7-3'UTR-SNP-C-C-A	4.58619e-07	RAC1				55181370-55181370-chr7-Synonymous-SNP-G-G-A	4.072e-08	EGFR
1581	CNBD1 Synonymous	6.73916e-05	CNBD1	2229577-2229577-chr1-Missense_Mutation-SNP-A-A-C	9.57641e-06	SKI	28689269-28689269-chr22-Intron-SNP-A-A-G	4.20418e-05	CHEK2	MALAT1 8.0 UTR	4.57878e-07	MALAT1				52404563-52404563-chr3-Synonymous-SNP-A-A-C	4.03906e-08	BAP1
[truncated: 3,856 more rows]

## Sheet: Supplementary Data 1b
Supplementary Data 1b: Feature importance obtained by the 6 models classifing BRCA
[truncated: 6,089 more rows]

[truncated: 17 more sheets: Supplementary Data 1c, Supplementary Data 1d, Supplementary Data 1e, Supplementary Data 1f, Supplementary Data 1g, Supplementary Data 1h, Supplementary Data 1i, Supplementary Data 1j, Supplementary Data 1k, Supplementary Data 1ll, Supplementary Data 1m, Supplementary Data 1n, Supplementary Data 1o, Supplementary Data 1p, Supplementary Data 1q, Supplementary Data 1r, Supplementary Data 1s]
