# Supplementary material for: Estimating the predictive power of silent mutations on cancer classification and prognosis
Source: NPJ Genom Med. 2021 Aug 12;6:67. doi: 10.1038/s41525-021-00229-1 (PMC8361094; doi:10.1038/s41525-021-00229-1)
Supplement: Supplementary file 3 — Supplementary Data 2 [file 41525_2021_229_MOESM3_ESM.xlsx]

## Sheet: Supplementary Data 2a
Supplementary Data 2a: Non-redundant GO terms	Cancer type/ Model	Non-Silent	Intron	UTR	Flank	Synonymous	All		MF
	BLCA	glycerophospholipid biosynthetic process	catalytic activity				catalytic activity		BP
		catabolic process	transmembrane receptor protein tyrosine kinase activity				transmembrane receptor protein tyrosine kinase activity		CC
		epidermal growth factor receptor signaling pathway	cyclic nucleotide binding				growth factor binding
		endothelial cell migration	transferase activity				nucleotide binding
		dendritic spine morphogenesis	drug binding				ion binding
		nucleoplasm	carbohydrate derivative binding				carbohydrate derivative binding
			nucleoside phosphate binding				transferase activity
			cAMP binding				nucleoside phosphate binding
			ATP binding				transmembrane receptor protein kinase activity
			anion binding				protein tyrosine kinase activity
			protein tyrosine kinase activity				protein autophosphorylation
			transmembrane receptor protein kinase activity				peptidyl-amino acid modification
			purine nucleotide binding				MLL3/4 complex
			nucleotide binding				integral component of plasma membrane
			purine ribonucleoside triphosphate binding				plasma membrane
			peptidyl-amino acid modification				intrinsic component of plasma membrane
			myelination in peripheral nervous system
			peptidyl-tyrosine phosphorylation
			protein autophosphorylation
			peptidyl-tyrosine modification
			receptor complex
			cell part
			plasma membrane
	BRCA	cellular macromolecule metabolic process	integral component of plasma membrane				catalytic activity
		negative regulation of morphogenesis of an epithelium	membrane				protein kinase activity
							drug binding
							ATP binding
							ion binding
							carbohydrate derivative binding
							transferase activity
							nucleoside phosphate binding
							anion binding
							metal ion binding
							cation binding
							transferase activity, transferring phosphorus-containing groups
							transmembrane receptor protein kinase activity
							lamellipodium
	CESC		catalytic activity		transferase complex		catalytic activity
			extracellular matrix structural constituent				protein tyrosine kinase activity
			drug binding				GTPase activator activity
			transferase activity				drug binding
			ATP binding				ion binding
			small molecule binding				carbohydrate derivative binding
			carbohydrate derivative binding				anion binding
			ion binding				transferase activity
			nucleoside phosphate binding				ATP binding
			anion binding
			purine nucleotide binding
			purine ribonucleoside triphosphate binding
	COAD		catalytic activity				dynein complex binding
			GTPase activator activity				ATP binding
			drug binding				carbohydrate derivative binding
			transferase activity				ion binding
			cytoskeletal protein binding				purine nucleotide binding
			ATP binding				purine ribonucleoside triphosphate binding
			carbohydrate derivative binding				peptidyl-lysine modification
			nucleoside phosphate binding				regulation of cellular localization
			anion binding				cellular component organization or biogenesis
			purine nucleotide binding				cellular component organization
			purine ribonucleoside triphosphate binding				organonitrogen compound metabolic process
			plasma membrane region				protein metabolic process
			intracellular non-membrane-bounded organelle				negative regulation of translational initiation
			non-membrane-bounded organelle				macromolecule modification
							cellular protein metabolic process
							peptidyl-amino acid modification
							histone lysine methylation
							cellular protein modification process
	GBM		catalytic activity	poly(A) binding			catalytic activity
			extracellular matrix structural constituent				drug binding
			drug binding				transferase activity
			transferase activity				lysine-acetylated histone binding
			ATP binding				ATP binding
			small molecule binding				carbohydrate derivative binding
			carbohydrate derivative binding				small molecule binding
			ion binding				ion binding
			nucleoside phosphate binding				platelet-derived growth factor binding
			anion binding				transferase activity, transferring phosphorus-containing groups
			purine nucleotide binding				nucleoside phosphate binding
			purine ribonucleoside triphosphate binding				anion binding
	HNSC	positive regulation of cell aging	catalytic activity			O-glycan processing	catalytic activity
			transmembrane receptor protein tyrosine kinase activity				protein kinase activity
			drug binding				GDP binding
			transferase activity				drug binding
			calmodulin binding				ion binding
			anion binding				carbohydrate derivative binding
			carbohydrate derivative binding				small molecule binding
			nucleoside phosphate binding				anion binding
			ion binding				nucleoside phosphate binding
			small molecule binding				ATPase activity
			ATP binding				transferase activity
			purine nucleotide binding				histone-lysine N-methyltransferase activity
			purine ribonucleoside triphosphate binding				ATP binding
			integral component of plasma membrane				metabolic process
			membrane				cellular component organization or biogenesis
			receptor complex				positive regulation of cell aging
			neuron projection membrane				DNA damage induced protein phosphorylation
			plasma membrane				regulation of synaptic transmission, GABAergic
							synapse organization
							cellular metabolic process
							regulation of response to stimulus
							macromolecule modification
							nitrogen compound metabolic process
							cellular component organization
							cellular protein modification process
							regulation of neuroblast proliferation
							macromolecule metabolic process
							cellular macromolecule metabolic process
							primary metabolic process
							organic substance metabolic process
							membrane
							axon part
	KIRC		catalytic activity				catalytic activity
			cell adhesion molecule binding				transmembrane receptor protein tyrosine kinase activity
							drug binding
							ion binding
							ATP binding
							carbohydrate derivative binding
							small molecule binding
							transferase activity
							nucleoside phosphate binding
							anion binding
							synapse part
	KIRP		catalytic activity	GTPase activator activity			catalytic activity
			transmembrane receptor protein tyrosine kinase activity				transmembrane receptor protein tyrosine kinase activity
			extracellular matrix structural constituent				ion binding
			drug binding				adenyl ribonucleotide binding
			transferase activity				anion binding
			nucleoside phosphate binding				transferase activity
			carbohydrate derivative binding				transmembrane receptor protein kinase activity
			small molecule binding				cellular component organization or biogenesis
			ATP binding				regulation of fibroblast apoptotic process
			adenyl ribonucleotide binding				cellular protein modification process
			adenyl nucleotide binding				cellular component organization
			purine ribonucleotide binding				organonitrogen compound metabolic process
			ribonucleotide binding				primary metabolic process
			anion binding				macromolecule modification
			cell part				cellular macromolecule metabolic process
			plasma membrane				cellular metabolic process
							protein metabolic process
							peptidyl-amino acid modification
							cellular protein metabolic process
	LGG	isocitrate dehydrogenase activity	transmembrane receptor protein tyrosine kinase activity				catalytic activity
		NAD binding					isocitrate dehydrogenase activity
		oxidoreductase activity, acting on CH-OH group of donors					NAD binding
		isocitrate dehydrogenase (NADP+) activity					actin filament binding
		oxidoreductase activity, acting on the CH-OH group of donors, NAD or NADP as acceptor					drug binding
		cell adhesion					anion binding
		biological adhesion					carbohydrate derivative binding
		nicotinamide nucleotide metabolic process					small molecule binding
		antibiotic metabolic process					ion binding
		cofactor metabolic process					nucleoside phosphate binding
		cellular aldehyde metabolic process					ATP binding
		isocitrate metabolic process					oxidoreductase activity, acting on CH-OH group of donors
		2-oxoglutarate metabolic process					isocitrate dehydrogenase (NADP+) activity
		glyoxylate cycle					regulation of transmembrane transport
		pyridine-containing compound metabolic process					nicotinamide nucleotide metabolic process
		glyoxylate metabolic process					cellular component organization or biogenesis
		peroxisome					antibiotic metabolic process
							synapse organization
							cofactor metabolic process
							cellular aldehyde metabolic process
							cellular component organization
							glyoxylate metabolic process
							pyridine-containing compound metabolic process
							isocitrate metabolic process
							2-oxoglutarate metabolic process
							positive regulation of cation transmembrane transport
							regulation of transport
							glyoxylate cycle
							peroxisome
	LIHC	regulation of canonical Wnt signaling pathway	cell adhesion molecule binding				catalytic activity
		regulation of morphogenesis of an epithelium	cadherin binding				anion binding
							ATP binding
							protein alkylation
							cellular component organization or biogenesis
							cellular component organization
							axon part
	LUAD		catalytic activity				catalytic activity
			protein tyrosine kinase activity				transmembrane receptor protein tyrosine kinase activity
			GTPase activator activity				drug binding
			drug binding				ATP binding
			platelet-derived growth factor binding				carbohydrate derivative binding
			transferase activity				ion binding
			ATP binding				small molecule binding
			carbohydrate derivative binding				transferase activity
			small molecule binding				nucleoside phosphate binding
			nucleoside phosphate binding				anion binding
			anion binding				transmembrane receptor protein kinase activity
			transmembrane receptor protein kinase activity				protein kinase activity
			protein kinase activity				cellular component organization
			purine nucleotide binding				peptidyl-amino acid modification
			purine ribonucleoside triphosphate binding				plasma membrane
			plasma membrane				cell projection part
							cell projection
							integral component of plasma membrane
	LUSC	integral component of plasma membrane	catalytic activity	poly-purine tract binding			catalytic activity
			transmembrane receptor protein tyrosine kinase activity				histone acetyltransferase activity
			drug binding				histone binding
			cell adhesion molecule binding				nucleotide binding
			ATP binding				transferase activity
			small molecule binding				nucleoside phosphate binding
			anion binding				protein kinase activity
			cadherin binding				transferase activity, transferring phosphorus-containing groups
			purine nucleotide binding				peptidyl-lysine modification
			purine ribonucleoside triphosphate binding				cellular component organization or biogenesis
							cellular component organization
							histone acetyltransferase complex
							membrane
							plasma membrane
	OV		catalytic activity
			drug binding
			transferase activity
			cell adhesion molecule binding
			ATP binding
			ion binding
			small molecule binding
			purine nucleotide binding
			purine ribonucleoside triphosphate binding
			cell adhesion
			peptidyl-amino acid modification
			biological adhesion
			cellular component organization or biogenesis
			organic substance metabolic process
			cellular component organization
			cellular metabolic process
			primary metabolic process
	PRAD		catalytic activity		nucleolus		catalytic activity
			protein tyrosine kinase activity		non-membrane-bounded organelle		protein kinase activity
			receptor binding		intracellular non-membrane-bounded organelle		extracellular matrix structural constituent
			transferase activity				drug binding
			drug binding				anion binding
			nucleoside phosphate binding				nucleoside phosphate binding
			carbohydrate derivative binding				carbohydrate derivative binding
			small molecule binding				small molecule binding
			ATP binding				ion binding
			anion binding				transferase activity
			transmembrane receptor protein tyrosine kinase activity				ATP binding
			cell adhesion molecule binding				metabolic process
			transmembrane receptor protein tyrosine phosphatase activity				cellular macromolecule metabolic process
			transmembrane receptor protein phosphatase activity				cellular component organization or biogenesis
			purine nucleotide binding				regulation of signal transduction
			purine ribonucleoside triphosphate binding				cellular component organization
			peptidyl-amino acid modification				organonitrogen compound metabolic process
			cellular component organization or biogenesis				nitrogen compound metabolic process
			cellular component organization				macromolecule metabolic process
			membrane				cellular protein modification process
			macromolecular complex				macromolecule modification
			cell projection				organic substance metabolic process
			receptor complex				cellular metabolic process
			integral component of plasma membrane				primary metabolic process
			cytoskeleton				protein metabolic process
			non-membrane-bounded organelle				regulation of cell communication
			intracellular non-membrane-bounded organelle				regulation of signaling
							peptidyl-amino acid modification
							cellular protein metabolic process
							membrane
	SARC		catalytic activity				anion binding
			protein kinase activity				ATP binding
			drug binding
			cell adhesion molecule binding
			transferase activity
			ATP binding
			carbohydrate derivative binding
			small molecule binding
			ion binding
			nucleoside phosphate binding
			anion binding
			actin filament binding
			transferase activity, transferring phosphorus-containing groups
			protein tyrosine kinase activity
			purine nucleotide binding
			purine ribonucleoside triphosphate binding
			peptidyl-amino acid modification
			cellular component organization or biogenesis
			cellular component organization
			intracellular non-membrane-bounded organelle
			synapse
			non-membrane-bounded organelle
	SKCM		catalytic activity	mitochondrial respiratory chain complex II, succinate dehydrogenase complex (ubiquinone)		protein tyrosine kinase activity	protein autophosphorylation
			protein tyrosine kinase activity			intrinsic component of plasma membrane	organelle
			drug binding
			molecular transducer activity
			transferase activity
			growth factor binding
			protein binding
			ATP binding
			small molecule binding
			carbohydrate derivative binding
			ion binding
			nucleoside phosphate binding
			cell adhesion molecule binding
			anion binding
			small GTPase binding
			transmembrane receptor protein tyrosine kinase activity
			protein kinase activity
			signaling receptor activity
			transmembrane receptor protein kinase activity
			purine nucleotide binding
			purine ribonucleoside triphosphate binding
			peptidyl-amino acid modification
			positive regulation of hydrolase activity
			cellular component organization or biogenesis
			extracellular matrix organization
			extracellular structure organization
			organelle organization
			integral component of plasma membrane
			membrane
			extracellular matrix component
			synapse
			glutamatergic synapse
			cell projection
			cytosol
			intracellular non-membrane-bounded organelle
			non-membrane-bounded organelle
	STAD	anatomical structure morphogenesis	ATP binding				catalytic activity
			transmembrane receptor protein kinase activity				transmembrane receptor protein tyrosine kinase activity
			protein tyrosine kinase activity				drug binding
			transmembrane receptor protein tyrosine kinase activity				growth factor binding
							carbohydrate derivative binding
							nucleoside phosphate binding
							anion binding
							small molecule binding
							ion binding
							ankyrin binding
							transferase activity
							histone methyltransferase activity (H3-K4 specific)
							ATP binding
							transferase activity, transferring phosphorus-containing groups
							transmembrane receptor protein kinase activity
							protein kinase activity
							membrane
							cell projection
							receptor complex
							membrane part
							Golgi apparatus
							plasma membrane
							integral component of plasma membrane
							plasma membrane part
	THCA	integral component of plasma membrane	catalytic activity				catalytic activity
			protein tyrosine kinase activity				transmembrane receptor protein tyrosine kinase activity
			drug binding				extracellular matrix structural constituent
			transferase activity				drug binding
			ATP binding				ion binding
			carbohydrate derivative binding				nucleoside phosphate binding
			small molecule binding				carbohydrate derivative binding
			ion binding				small molecule binding
			transferase activity, transferring phosphorus-containing groups				transferase activity
			nucleoside phosphate binding				ATP binding
			anion binding				anion binding
			transmembrane receptor protein tyrosine kinase activity				metal ion binding
			phosphotransferase activity, alcohol group as acceptor				cation binding
			purine nucleotide binding				transmembrane receptor protein kinase activity
			purine ribonucleoside triphosphate binding				protein tyrosine kinase activity
			regulation of carbohydrate metabolic process
			integral component of plasma membrane
			membrane
	UCEC	glycerophospholipid biosynthetic process	catalytic activity				catalytic activity
		catabolic process	GTPase activator activity				protein kinase activity
		epidermal growth factor receptor signaling pathway	drug binding				drug binding
		endothelial cell migration	histone-lysine N-methyltransferase activity				insulin receptor substrate binding
		dendritic spine morphogenesis	transmembrane receptor protein tyrosine phosphatase activity				ATP binding
		phosphatidylinositol 3-kinase complex, class I	transferase activity				carbohydrate derivative binding
			ATP binding				ion binding
			carbohydrate derivative binding				small molecule binding
			small molecule binding				protein tyrosine kinase binding
			nucleoside phosphate binding				transmembrane receptor protein tyrosine phosphatase activity
			anion binding				transferase activity
			transmembrane receptor protein phosphatase activity				nucleoside phosphate binding
			protein methyltransferase activity				anion binding
			N-methyltransferase activity				transferase activity, transferring phosphorus-containing groups
			protein tyrosine phosphatase activity				transmembrane receptor protein phosphatase activity
			purine nucleotide binding				cell-substrate adhesion
			purine ribonucleoside triphosphate binding				protein autophosphorylation
			membrane				epidermal growth factor receptor signaling pathway
			macromolecular complex				dendritic spine morphogenesis
			synapse				positive regulation of cardiac muscle cell apoptotic process
			plasma membrane region				lipid modification
			MLL3/4 complex				macromolecule modification
			cell projection				negative regulation of osteoclast differentiation
			receptor complex				cellular protein modification process
			basolateral plasma membrane				dendritic spine organization
			plasma membrane protein complex				peptidyl-amino acid modification
							cellular protein metabolic process
							glycerophospholipid biosynthetic process
							protein phosphorylation
							phosphatidylinositol 3-kinase complex, class I

## Sheet: Supplementary Data 2b
Supplementary Data 2b: unique GO terms per model	Non-Silent	Intron	UTR	Flank	Synonymous	All
	anatomical structure morphogenesis	N-methyltransferase activity	mitochondrial respiratory chain complex II, succinate dehydrogenase complex (ubiquinone)	nucleolus	O-glycan processin	ATPase activity
	catabolic process	adenyl nucleotide binding	poly(A) binding	transferase complex		DNA damage induced protein phosphorylation
	endothelial cell migration	basolateral plasma membrane	poly-purine tract binding			GDP binding
	negative regulation of morphogenesis of an epithelium	cAMP binding				Golgi apparatus
	nucleoplasm	cadherin binding				ankyrin binding
	oxidoreductase activity, acting on the CH-OH group of donors, NAD or NADP as acceptor	calmodulin binding				axon part
	regulation of canonical Wnt signaling pathway	cell adhesion molecule binding				cation binding
	regulation of morphogenesis of an epithelium	cell part				cell projection part
		cyclic nucleotide binding				cell-substrate adhesion
		cytoskeletal protein binding				cellular protein metabolic process
		cytoskeleton				cellular protein modification process
		cytosol				dendritic spine organization
		extracellular matrix component				dynein complex binding
		extracellular matrix organization				histone acetyltransferase activity
		extracellular structure organization				histone acetyltransferase complex
		glutamatergic synapse				histone binding
		macromolecular complex				histone lysine methylation
		molecular transducer activity				histone methyltransferase activity (H3-K4 specific)
		myelination in peripheral nervous system				insulin receptor substrate binding
		neuron projection membrane				lamellipodium
		organelle organization				lipid modification
		peptidyl-tyrosine modification				lysine-acetylated histone bindin
		peptidyl-tyrosine phosphorylation				macromolecule metabolic process
		phosphotransferase activity				macromolecule modification
		alcohol group as acceptor				membrane part
		plasma membrane protein comple				metabolic process
		plasma membrane region				metal ion binding
		positive regulation of hydrolase activity				negative regulation of osteoclast differentiation
		protein binding				negative regulation of translational initiation
		protein methyltransferase activity				nitrogen compound metabolic process
		protein tyrosine phosphatase activity				organelle
		purine ribonucleotide binding				organonitrogen compound metabolic process
		receptor binding				peptidyl-lysine modification
		regulation of carbohydrate metabolic process				plasma membrane par
		ribonucleotide binding				positive regulation of cardiac muscle cell apoptotic process
		signaling receptor activity				positive regulation of cation transmembrane transport
		small GTPase binding				protein alkylation
						protein metabolic process
						protein phosphorylation
						protein tyrosine kinase binding
						regulation of cell communication
						regulation of cellular localization
						regulation of fibroblast apoptotic process
						regulation of neuroblast proliferation
						regulation of response to stimulus
						regulation of signal transduction
						regulation of signaling
						regulation of synaptic transmission
						GABAergic
						regulation of transmembrane transport
						regulation of transport
						synapse organization
						synapse part

## Sheet: Supplementary Data 2c
Supplementary Data 2c: REACTOME pathway analysis	Project/ Model	Non-Silent	Synonymous	Intron	Flank	UTR	All
Pathways found enriched in the top 50 genes for each cancer type/model combination, FDR< 0.01.
	BLCA	Activation of HOX genes during differentiation	PKMTs methylate histone lysines	ERBB2 Activates PTK6 Signaling			Activation of HOX genes during differentiation
		Activation of anterior HOX genes in hindbrain development during early embryogenesis		GRB7 events in ERBB2 signaling			Activation of anterior HOX genes in hindbrain development during early embryogenesis
		Activation of the TFAP2 (AP-2) family of transcription factors		SHC1 events in ERBB2 signaling			Chromatin modifying enzymes
		Attenuation phase		Signaling by ERBB2			Downregulation of ERBB2 signaling
		Cellular response to heat stress		Signaling by Non-Receptor Tyrosine Kinases			Drug-mediated inhibition of ERBB2 signaling
		Chromatin modifying enzymes		Signaling by PTK6			ERBB2 Activates PTK6 Signaling
		Cytosolic sensors of pathogen-associated DNA		Signaling by Receptor Tyrosine Kinases			ERBB2 Regulates Cell Motility
		DNA Damage/Telomere Stress Induced Senescence					ESR-mediated signaling
		Downregulation of ERBB2 signaling					Formation of Senescence-Associated Heterochromatin Foci (SAHF)
		Downregulation of ERBB2:ERBB3 signaling					GRB7 events in ERBB2 signaling
		Drug-mediated inhibition of ERBB2 signaling					Generic Transcription Pathway
		ERBB2 Activates PTK6 Signaling					Intracellular signaling by second messengers
		ERBB2 Regulates Cell Motility					MAPK1/MAPK3 signaling
		ESR-mediated signaling					Negative regulation of the PI3K/AKT network
		Estrogen-dependent gene expression					PI3K events in ERBB2 signaling
		FOXO-mediated transcription of cell death genes					PI5P Regulates TP53 Acetylation
		Formation of Senescence-Associated Heterochromatin Foci (SAHF)					PI5P, PP2A and IER3 Regulate PI3K/AKT Signaling
		Formation of the beta-catenin:TCF transactivating complex					PIP3 activates AKT signaling
		GRB2 events in ERBB2 signaling					PKMTs methylate histone lysines
		GRB7 events in ERBB2 signaling					PLCG1 events in ERBB2 signaling
		Generic Transcription Pathway					RAF/MAP kinase cascade
		HSF1-dependent transactivation					RNA Polymerase II Transcription
		IGF1R signaling cascade					RUNX3 regulates CDKN1A transcription
		IRS-related events triggered by IGF1R					SHC1 events in ERBB2 signaling
		Intracellular signaling by second messengers					Signaling by ERBB2
		LRR FLII-interacting protein 1 (LRRFIP1) activates type I IFN production					Signaling by FGFR3
		MAPK family signaling cascades					Signaling by Receptor Tyrosine Kinases
		MAPK1/MAPK3 signaling					TP53 Regulates Transcription of Cell Cycle Genes
		Negative regulation of the PI3K/AKT network					Transcriptional activation of cell cycle inhibitor p21
		PI3K events in ERBB2 signaling					Transcriptional activation of p53 responsive genes
		PI5P Regulates TP53 Acetylation					Transcriptional regulation by RUNX3
		PI5P, PP2A and IER3 Regulate PI3K/AKT Signaling					Transcriptional regulation by the AP-2 (TFAP2) family of transcription factors
		PIP3 activates AKT signaling
		PLCG1 events in ERBB2 signaling
		Pre-NOTCH Expression and Processing
		Pre-NOTCH Transcription and Translation
		RAF/MAP kinase cascade
		RNA Polymerase II Transcription
		RUNX3 regulates CDKN1A transcription
		RUNX3 regulates NOTCH signaling
		Regulation of FOXO transcriptional activity by acetylation
		Regulation of TP53 Activity through Methylation
		Regulation of gene expression by Hypoxia-inducible Factor
		Regulation of gene expression in late stage (branching morphogenesis) pancreatic bud precursor cells
		SHC1 events in ERBB2 signaling
		Signaling by ERBB2
		Signaling by ERBB4
		Signaling by FGFR3
		Signaling by NOTCH
		Signaling by NOTCH3
		Signaling by Non-Receptor Tyrosine Kinases
		Signaling by Nuclear Receptors
		Signaling by PTK6
		Signaling by Receptor Tyrosine Kinases
		Signaling by Type 1 Insulin-like Growth Factor 1 Receptor (IGF1R)
		TCF dependent signaling in response to WNT
		TFAP2 (AP-2) family regulates transcription of growth factors and their receptors
		TP53 Regulates Transcription of Caspase Activators and Caspases
		TP53 Regulates Transcription of Cell Cycle Genes
		TP53 Regulates Transcription of Cell Death Genes
		TP53 Regulates Transcription of Genes Involved in Cytochrome C Release
		TP53 Regulates Transcription of Genes Involved in G1 Cell Cycle Arrest
		TRAF3-dependent IRF activation pathway
		The role of GTSE1 in G2/M progression after G2 checkpoint
		Transcriptional activation of cell cycle inhibitor p21
		Transcriptional Regulation by TP53
		Transcriptional activation of p53 responsive genes
		Transcriptional regulation by RUNX1
		Transcriptional regulation by RUNX3
		Transcriptional regulation by the AP-2 (TFAP2) family of transcription factors
	BRCA	Beta-catenin phosphorylation cascade		RUNX2 regulates bone development			Beta-catenin phosphorylation cascade
		Generic Transcription Pathway		RUNX2 regulates osteoblast differentiation			Disassembly of the destruction complex and recruitment of AXIN to the membrane
		RNA Polymerase II Transcription		Transcriptional regulation by RUNX2			Generic Transcription Pathway
		Signaling by WNT					Myogenesis
		TCF dependent signaling in response to WNT					RNA Polymerase II Transcription
		Transcriptional regulation by RUNX1					RUNX2 regulates bone development
							RUNX2 regulates osteoblast differentiation
							SUMOylation of DNA damage response and repair proteins
	CESC	Activation of HOX genes during differentiation					Cytokine Signaling in Immune system
		Activation of anterior HOX genes in hindbrain development during early embryogenesis					Regulation of TP53 Activity through Methylation
	COAD	Chromatin modifying enzymes			Generic Transcription Pathway		Activation of HOX genes during differentiation
		Generic Transcription Pathway			RNA Polymerase II Transcription		Activation of anterior HOX genes in hindbrain development during early embryogenesis
		RNA Polymerase II Transcription			RUNX1 and FOXP3 control the development of regulatory T lymphocytes (Tregs)		Ovarian tumor domain proteases
		Regulation of PTEN gene transcription			RUNX1 regulates estrogen receptor mediated transcription
		Regulation of TP53 Activity			RUNX1 regulates transcription of genes involved in WNT signaling
		Transcriptional regulation by RUNX3			Transcriptional regulation by RUNX1
	GBM	Activated NTRK2 signals through PI3K	Antiviral mechanism by IFN-stimulated genes				C-type lectin receptors (CLRs)
		Activated NTRK3 signals through PI3K	Chromatin modifying enzymes				Chromatin modifying enzymes
		C-type lectin receptors (CLRs)	Downregulation of ERBB2 signaling				Intracellular signaling by second messengers
		CD209 (DC-SIGN) signaling	EGFR interacts with phospholipase C-gamma				PIP3 activates AKT signaling
		CD28 dependent PI3K/Akt signaling	Interferon Signaling				PKMTs methylate histone lysines
		Chromatin modifying enzymes	Nuclear Pore Complex (NPC) Disassembly				PTEN Regulation
		DAP12 interactions	PKMTs methylate histone lysines				Regulation of PTEN gene transcription
		DAP12 signaling	PLCG1 events in ERBB2 signaling
		Downstream signal transduction	Regulation of Glucokinase by Glucokinase Regulatory Protein
		Downstream signaling of activated FGFR1	SUMOylation of DNA replication proteins
		Downstream signaling of activated FGFR2	SUMOylation of RNA binding proteins
		Downstream signaling of activated FGFR3	SUMOylation of SUMOylation proteins
		Downstream signaling of activated FGFR4	SUMOylation of ubiquitinylation proteins
		EGFR Transactivation by Gastrin	Transport of Mature mRNA Derived from an Intronless Transcript
		ESR-mediated signaling	Transport of Mature mRNAs Derived from Intronless Transcripts
		Erythropoietin activates Phosphoinositide-3-kinase (PI3K)	Transport of the SLBP Dependant Mature mRNA
		Extra-nuclear estrogen signaling	Transport of the SLBP independent Mature mRNA
		FLT3 Signaling
		GAB1 signalosome
		GP1b-IX-V activation signalling
		GRB2 events in EGFR signaling
		GRB2 events in ERBB2 signaling
		Gastrin-CREB signalling pathway via PKC and MAPK
		Generic Transcription Pathway
		IGF1R signaling cascade
		IRS-mediated signalling
		IRS-related events triggered by IGF1R
		Insulin receptor signalling cascade
		Intracellular signaling by second messengers
		MAP2K and MAPK activation
		MAPK family signaling cascades
		MAPK1/MAPK3 signaling
		MET activates PI3K/AKT signaling
		Negative feedback regulation of MAPK pathway
		Negative regulation of MAPK pathway
		Negative regulation of the PI3K/AKT network
		Nephrin family interactions
		PI Metabolism
		PI-3K cascade:FGFR1
		PI-3K cascade:FGFR2
		PI-3K cascade:FGFR3
		PI-3K cascade:FGFR4
		PI3K events in ERBB2 signaling
		PI3K events in ERBB4 signaling
		PI3K/AKT activation
		PIP3 activates AKT signaling
		PKMTs methylate histone lysines
		PTEN Regulation
		RAF activation
		RAF/MAP kinase cascade
		RNA Polymerase II Transcription
		RUNX1 regulates genes involved in megakaryocyte differentiation and platelet function
		RUNX3 regulates CDKN1A transcription
		RUNX3 regulates p14-ARF
		Regulation of PTEN gene transcription
		Regulation of signaling by CBL
		SHC1 events in EGFR signaling
		SHC1 events in ERBB2 signaling
		SUMO E3 ligases SUMOylate target proteins
		SUMOylation
		SUMOylation of transcription factors
		Signaling by EGFR
		Signaling by ERBB2
		Signaling by ERBB4
		Signaling by Erythropoietin
		Signaling by FGFR
		Signaling by FGFR1
		Signaling by FGFR2
		Signaling by FGFR3
		Signaling by FGFR4
		Signaling by Insulin receptor
		Signaling by MET
		Signaling by NOTCH3
		Signaling by NTRK1 (TRKA)
		Signaling by NTRK2 (TRKB)
		Signaling by NTRK3 (TRKC)
		Signaling by NTRKs
		Signaling by Nuclear Receptors
		Signaling by PDGF
		Signaling by Receptor Tyrosine Kinases
		Signaling by SCF-KIT
		Signaling by Type 1 Insulin-like Growth Factor 1 Receptor (IGF1R)
		Synthesis of PIPs at the plasma membrane
		TP53 Regulates Transcription of Genes Involved in Cytochrome C Release
		Tie2 Signaling
		Transcriptional regulation by RUNX1
		Transcriptional regulation by RUNX3
	HNSC	Activated NTRK2 signals through FRS2 and FRS3		Chromatin modifying enzymes			Activated NTRK2 signals through FRS2 and FRS3
		Activated NTRK2 signals through RAS		Generic Transcription Pathway			Activated NTRK2 signals through RAS
		Activated NTRK3 signals through RAS		RNA Polymerase II Transcription			Activated NTRK3 signals through RAS
		Activation of NMDA receptors and postsynaptic events					Activation of NMDA receptors and postsynaptic events
		Activation of RAS in B cells					Activation of PUMA and translocation to mitochondria
		C-type lectin receptors (CLRs)					Activation of RAS in B cells
		CD209 (DC-SIGN) signaling					Axon guidance
		CREB1 phosphorylation through NMDA receptor-mediated activation of RAS signaling					C-type lectin receptors (CLRs)
		Cell surface interactions at the vascular wall					CD209 (DC-SIGN) signaling
		Chromatin modifying enzymes					CREB1 phosphorylation through NMDA receptor-mediated activation of RAS signaling
		DAP12 interactions					Cell Cycle Checkpoints
		DAP12 signaling					Cell surface interactions at the vascular wall
		DNA Double Strand Break Response					Cellular Senescence
		Downregulation of ERBB2:ERBB3 signaling					Chromatin modifying enzymes
		Downstream signal transduction					DAP12 interactions
		Downstream signaling of activated FGFR1					DAP12 signaling
		Downstream signaling of activated FGFR2					DNA Double Strand Break Response
		Downstream signaling of activated FGFR3					DNA Double-Strand Break Repair
		Downstream signaling of activated FGFR4					Downstream signal transduction
		EGFR Transactivation by Gastrin					Downstream signaling events of B Cell Receptor (BCR)
		Erythropoietin activates RAS					Downstream signaling of activated FGFR1
		Estrogen-stimulated signaling through PRKCZ					Downstream signaling of activated FGFR2
		Extra-nuclear estrogen signaling					Downstream signaling of activated FGFR3
		FLT3 Signaling					Downstream signaling of activated FGFR4
		FRS-mediated FGFR1 signaling					EGFR Transactivation by Gastrin
		FRS-mediated FGFR2 signaling					ESR-mediated signaling
		FRS-mediated FGFR3 signaling					Erythropoietin activates RAS
		FRS-mediated FGFR4 signaling					Estrogen-stimulated signaling through PRKCZ
		GRB2 events in EGFR signaling					Extra-nuclear estrogen signaling
		GRB2 events in ERBB2 signaling					FLT3 Signaling
		Gastrin-CREB signalling pathway via PKC and MAPK					FRS-mediated FGFR1 signaling
		Generic Transcription Pathway					FRS-mediated FGFR2 signaling
		IGF1R signaling cascade					FRS-mediated FGFR3 signaling
		IRS-mediated signalling					FRS-mediated FGFR4 signaling
		IRS-related events triggered by IGF1R					G1/S DNA Damage Checkpoints
		Insulin receptor signalling cascade					G2/M DNA damage checkpoint
		Intracellular signaling by second messengers					GRB2 events in EGFR signaling
		Intrinsic Pathway for Apoptosis					GRB2 events in ERBB2 signaling
		MAP2K and MAPK activation					Gastrin-CREB signalling pathway via PKC and MAPK
		MAPK family signaling cascades					Generic Transcription Pathway
		MAPK1/MAPK3 signaling					IGF1R signaling cascade
		MET activates RAS signaling					IRS-mediated signalling
		NCAM signaling for neurite out-growth					IRS-related events triggered by IGF1R
		Negative regulation of MAPK pathway					Innate Immune System
		PI3K events in ERBB2 signaling					Insulin receptor signalling cascade
		PI3K events in ERBB4 signaling					Intrinsic Pathway for Apoptosis
		PIP3 activates AKT signaling					MAP2K and MAPK activation
		PKMTs methylate histone lysines					MAPK family signaling cascades
		PTK6 Regulates RHO GTPases, RAS GTPase and MAP kinases					MAPK1/MAPK3 signaling
		Post NMDA receptor activation events					MET activates RAS signaling
		RAF activation					NCAM signaling for neurite out-growth
		RAF/MAP kinase cascade					NOTCH4 Intracellular Domain Regulates Transcription
		RAS processing					Negative regulation of MAPK pathway
		RNA Polymerase II Transcription					Ovarian tumor domain proteases
		RUNX1 regulates genes involved in megakaryocyte differentiation and platelet function					PKMTs methylate histone lysines
		RUNX3 regulates CDKN1A transcription					PTK6 Regulates RHO GTPases, RAS GTPase and MAP kinases
		RUNX3 regulates p14-ARF					Post NMDA receptor activation events
		Ras activation upon Ca2+ influx through NMDA receptor					RAF activation
		Recruitment and ATM-mediated phosphorylation of repair and signaling proteins at DNA double strand breaks					RAF/MAP kinase cascade
		Regulation of PTEN gene transcription					RAS processing
		Regulation of RAS by GAPs					RNA Polymerase II Transcription
		SHC-mediated cascade:FGFR1					RUNX3 regulates p14-ARF
		SHC-mediated cascade:FGFR2					Ras activation upon Ca2+ influx through NMDA receptor
		SHC-mediated cascade:FGFR3					Recruitment and ATM-mediated phosphorylation of repair and signaling proteins at DNA double strand breaks
		SHC-mediated cascade:FGFR4					Regulation of PTEN gene transcription
		SHC-related events triggered by IGF1R					Regulation of RAS by GAPs
		SHC1 events in EGFR signaling					Regulation of TP53 Activity
		SHC1 events in ERBB2 signaling					Regulation of TP53 Activity through Association with Co-factors
		SHC1 events in ERBB4 signaling					Regulation of TP53 Activity through Methylation
		SOS-mediated signalling					Regulation of TP53 Degradation
		SUMO E3 ligases SUMOylate target proteins					Regulation of TP53 Expression and Degradation
		SUMOylation					SHC-mediated cascade:FGFR1
		Signaling by EGFR					SHC-mediated cascade:FGFR2
		Signaling by ERBB2					SHC-mediated cascade:FGFR3
		Signaling by ERBB4					SHC-mediated cascade:FGFR4
		Signaling by Erythropoietin					SHC-related events triggered by IGF1R
		Signaling by FGFR					SHC1 events in EGFR signaling
		Signaling by FGFR1					SHC1 events in ERBB2 signaling
		Signaling by FGFR2					SHC1 events in ERBB4 signaling
		Signaling by FGFR3					SOS-mediated signalling
		Signaling by FGFR4					SUMO E3 ligases SUMOylate target proteins
		Signaling by Insulin receptor					SUMOylation
		Signaling by MET					SUMOylation of transcription factors
		Signaling by NTRK1 (TRKA)					Signaling by EGFR
		Signaling by NTRK2 (TRKB)					Signaling by ERBB2
		Signaling by NTRK3 (TRKC)					Signaling by ERBB4
		Signaling by NTRKs					Signaling by Erythropoietin
		Signaling by Non-Receptor Tyrosine Kinases					Signaling by FGFR
		Signaling by PDGF					Signaling by FGFR1
		Signaling by PTK6					Signaling by FGFR2
		Signaling by Receptor Tyrosine Kinases					Signaling by FGFR3
		Signaling by SCF-KIT					Signaling by FGFR4
		Signaling by Type 1 Insulin-like Growth Factor 1 Receptor (IGF1R)					Signaling by Insulin receptor
		Signaling by VEGF					Signaling by MET
		Signalling to ERKs					Signaling by NTRK1 (TRKA)
		Signalling to RAS					Signaling by NTRK2 (TRKB)
		Tie2 Signaling					Signaling by NTRK3 (TRKC)
		Transcriptional Regulation by VENTX					Signaling by NTRKs
		Transcriptional regulation by RUNX1					Signaling by Non-Receptor Tyrosine Kinases
		Transcriptional regulation by RUNX3					Signaling by Nuclear Receptors
		VEGFA-VEGFR2 Pathway					Signaling by PDGF
		VEGFR2 mediated cell proliferation					Signaling by PTK6
		p38MAPK events					Signaling by Receptor Tyrosine Kinases
							Signaling by SCF-KIT
							Signaling by Type 1 Insulin-like Growth Factor 1 Receptor (IGF1R)
							Signaling by VEGF
							Signalling to ERKs
							Signalling to RAS
							Stabilization of p53
							TP53 Regulates Transcription of Caspase Activators and Caspases
							TP53 Regulates Transcription of Cell Death Genes
							TP53 Regulates Transcription of DNA Repair Genes
							TP53 Regulates Transcription of Death Receptors and Ligands
							TP53 Regulates Transcription of Genes Involved in Cytochrome C Release
							TP53 regulates transcription of several additional cell death genes whose specific roles in p53-dependent apoptosis remain uncertain
							Tie2 Signaling
							Transcriptional Regulation by TP53
							Transcriptional regulation by RUNX1
							Transcriptional regulation by RUNX3
							VEGFA-VEGFR2 Pathway
							VEGFR2 mediated cell proliferation
							p38MAPK events
							p53-Dependent G1 DNA Damage Response
							p53-Dependent G1/S DNA damage checkpoint
	KIRC	Chromatin modifying enzymes	Activation of HOX genes during differentiation	Chromatin modifying enzymes			Chromatin modifying enzymes
			Activation of anterior HOX genes in hindbrain development during early embryogenesis	Intracellular signaling by second messengers
			Notch-HLH transcription pathway	Negative regulation of the PI3K/AKT network
			TCF dependent signaling in response to WNT	PI5P, PP2A and IER3 Regulate PI3K/AKT Signaling
				PIP3 activates AKT signaling
				PLCG1 events in ERBB2 signaling
				RUNX1 interacts with co-factors whose precise effect on RUNX1 targets is not known
				Signaling by Receptor Tyrosine Kinases
	KIRP		Activation of HOX genes during differentiation
			Activation of anterior HOX genes in hindbrain development during early embryogenesis
			Notch-HLH transcription pathway
			TCF dependent signaling in response to WNT
	LGG	Chromatin modifying enzymes	Chromatin modifying enzymes		Intracellular signaling by second messengers		GAB1 signalosome
		GAB1 signalosome	PKMTs methylate histone lysines		PIP3 activates AKT signaling		Intracellular signaling by second messengers
		PKMTs methylate histone lysines			RHO GTPases Activate Formins		Negative regulation of the PI3K/AKT network
		RNA Polymerase II Transcription			RUNX2 regulates bone development		PI3K events in ERBB2 signaling
					RUNX2 regulates osteoblast differentiation		PIP3 activates AKT signaling
					Signaling by Rho GTPases		Regulation of TP53 Degradation
							Regulation of TP53 Expression and Degradation
							TP53 Regulates Transcription of Genes Involved in Cytochrome C Release
	LIHC	DAP12 signaling	Chromatin modifying enzymes		ESR-mediated signaling	"Interleukin-3, Interleukin-5 and GM-CSF signaling"
		Downstream signal transduction			Estrogen-dependent gene expression
		Generic Transcription Pathway			PKMTs methylate histone lysines
		LRR FLII-interacting protein 1 (LRRFIP1) activates type I IFN production			RUNX1 regulates estrogen receptor mediated transcription
		NOTCH3 Intracellular Domain Regulates Transcription			RUNX1 regulates transcription of genes involved in WNT signaling
		RNA Polymerase II Transcription
		Signaling by Erythropoietin
		Signaling by NTRK1 (TRKA)
		Signaling by NTRKs
		Signaling by VEGF
		Tie2 Signaling
		Transcriptional regulation by RUNX3
		VEGFA-VEGFR2 Pathway
	LUAD	Activated NTRK2 signals through FRS2 and FRS3				Cytokine Signaling in Immune system	Activated NTRK2 signals through FRS2 and FRS3
		Activated NTRK2 signals through RAS				Interleukin-4 and Interleukin-13 signaling	Activated NTRK2 signals through RAS
		Activated NTRK3 signals through RAS					Activated NTRK3 signals through RAS
		Activation of RAS in B cells					Activation of RAS in B cells
		Axon guidance					DNA Double Strand Break Response
		C-type lectin receptors (CLRs)					Downstream signaling of activated FGFR3
		CD209 (DC-SIGN) signaling					EGFR Transactivation by Gastrin
		Chromatin modifying enzymes					ERBB2 Activates PTK6 Signaling
		DAP12 interactions					ERBB2 Regulates Cell Motility
		DAP12 signaling					Erythropoietin activates RAS
		Downstream signal transduction					Estrogen-stimulated signaling through PRKCZ
		Downstream signaling of activated FGFR1					Extra-nuclear estrogen signaling
		Downstream signaling of activated FGFR2					FRS-mediated FGFR3 signaling
		Downstream signaling of activated FGFR3					GRB2 events in EGFR signaling
		Downstream signaling of activated FGFR4					GRB2 events in ERBB2 signaling
		EGFR Transactivation by Gastrin					Gastrin-CREB signalling pathway via PKC and MAPK
		Erythropoietin activates RAS					IGF1R signaling cascade
		Estrogen-stimulated signaling through PRKCZ					IRS-mediated signalling
		Extra-nuclear estrogen signaling					IRS-related events triggered by IGF1R
		FLT3 Signaling					Insulin receptor signalling cascade
		FRS-mediated FGFR3 signaling					Intracellular signaling by second messengers
		GAB1 signalosome					MAP2K and MAPK activation
		GRB2 events in EGFR signaling					MAPK family signaling cascades
		GRB2 events in ERBB2 signaling					MAPK1/MAPK3 signaling
		Gastrin-CREB signalling pathway via PKC and MAPK					MET activates RAS signaling
		Generic Transcription Pathway					Negative regulation of MAPK pathway
		IGF1R signaling cascade					Negative regulation of the PI3K/AKT network
		IRS-mediated signalling					PI3K events in ERBB2 signaling
		IRS-related events triggered by IGF1R					PIP3 activates AKT signaling
		Insulin receptor signalling cascade					PTK6 Regulates RHO GTPases, RAS GTPase and MAP kinases
		Intracellular signaling by second messengers					Post NMDA receptor activation events
		MAP2K and MAPK activation					RAF activation
		MET activates RAS signaling					RAF/MAP kinase cascade
		Negative regulation of MAPK pathway					Recruitment and ATM-mediated phosphorylation of repair and signaling proteins at DNA double strand breaks
		Ovarian tumor domain proteases					Regulation of PTEN gene transcription
		PI3K events in ERBB2 signaling					Regulation of TP53 Activity
		PIP3 activates AKT signaling					Regulation of TP53 Activity through Phosphorylation
		PKMTs methylate histone lysines					Regulation of TP53 Degradation
		PTEN Regulation					Regulation of TP53 Expression and Degradation
		PTK6 Regulates RHO GTPases, RAS GTPase and MAP kinases					SHC-mediated cascade:FGFR3
		RAF activation					SHC-related events triggered by IGF1R
		RAS processing					SHC1 events in EGFR signaling
		RNA Polymerase II Transcription					SHC1 events in ERBB2 signaling
		RUNX3 regulates CDKN1A transcription					SHC1 events in ERBB4 signaling
		Ras activation upon Ca2+ influx through NMDA receptor					SOS-mediated signalling
		Regulation of PTEN gene transcription					Signaling by EGFR
		Regulation of PTEN localization					Signaling by ERBB2
		Regulation of TP53 Activity					Signaling by ERBB4
		Regulation of TP53 Activity through Acetylation					Signaling by FGFR
		SHC-mediated cascade:FGFR1					Signaling by FGFR1
		SHC-mediated cascade:FGFR3					Signaling by FGFR3
		SHC-mediated cascade:FGFR4					Signaling by FGFR4
		SHC-related events triggered by IGF1R					Signaling by Non-Receptor Tyrosine Kinases
		SHC1 events in EGFR signaling					Signaling by PTK6
		SHC1 events in ERBB2 signaling					Signaling by Receptor Tyrosine Kinases
		SHC1 events in ERBB4 signaling					Signaling by Type 1 Insulin-like Growth Factor 1 Receptor (IGF1R)
		SOS-mediated signalling					Signalling to ERKs
		Signaling by EGFR					Transport of Mature mRNA Derived from an Intronless Transcript
		Signaling by ERBB2					Transport of Mature mRNAs Derived from Intronless Transcripts
		Signaling by ERBB4					p38MAPK events
		Signaling by Erythropoietin
		Signaling by FGFR
		Signaling by FGFR1
		Signaling by FGFR2
		Signaling by FGFR3
		Signaling by FGFR4
		Signaling by MET
		Signaling by NTRK1 (TRKA)
		Signaling by NTRK2 (TRKB)
		Signaling by NTRK3 (TRKC)
		Signaling by NTRKs
		Signaling by Non-Receptor Tyrosine Kinases
		Signaling by PDGF
		Signaling by PTK6
		Signaling by Receptor Tyrosine Kinases
		Signaling by SCF-KIT
		Signaling by Type 1 Insulin-like Growth Factor 1 Receptor (IGF1R)
		Signalling to ERKs
		Signalling to RAS
		Tie2 Signaling
		VEGFR2 mediated cell proliferation
		p38MAPK events
	LUSC	Chromatin modifying enzymes
		Formation of the beta-catenin:TCF transactivating complex
		Generic Transcription Pathway
		LRR FLII-interacting protein 1 (LRRFIP1) activates type I IFN production
		RNA Polymerase II Transcription
		RUNX1 regulates genes involved in megakaryocyte differentiation and platelet function
		RUNX3 regulates CDKN1A transcription
		RUNX3 regulates p14-ARF
		Regulation of TP53 Activity
		Regulation of TP53 Activity through Acetylation
		Signaling by NTRK1 (TRKA)
		Signaling by NTRKs
		Transcriptional regulation by RUNX1
		Transcriptional regulation by RUNX3
	OV	Signaling by NOTCH3	Activation of HOX genes during differentiation	Generic Transcription Pathway
		Transcriptional regulation by RUNX1	Activation of anterior HOX genes in hindbrain development during early embryogenesis	NOTCH4 Intracellular Domain Regulates Transcription
			Aryl hydrocarbon receptor signalling	Notch-HLH transcription pathway
			Cellular response to heat stress	RHO GTPases activate PAKs
			Chromatin modifying enzymes	RNA Polymerase II Transcription
			Generic Transcription Pathway	RUNX2 regulates osteoblast differentiation
			HSF1-dependent transactivation	Sema4D in semaphorin signaling
			RNA Polymerase II Transcription	Sema4D induced cell migration and growth-cone collapse
			RUNX1 regulates genes involved in megakaryocyte differentiation and platelet function
			Regulation of TP53 Activity
			Regulation of TP53 Activity through Methylation
			Regulation of TP53 Degradation
			Regulation of TP53 Expression and Degradation
			Transcriptional Regulation by TP53
	PRAD	Activated NTRK2 signals through FRS2 and FRS3			PKMTs methylate histone lysines		Activated NTRK2 signals through FRS2 and FRS3
		Activated NTRK2 signals through PI3K					Activated NTRK2 signals through RAS
		Activated NTRK2 signals through RAS					Activated NTRK3 signals through PI3K
		Activated NTRK3 signals through PI3K					Activated NTRK3 signals through RAS
		Activated NTRK3 signals through RAS					Activation of NMDA receptors and postsynaptic events
		Activation of RAS in B cells					Activation of RAS in B cells
		Axon guidance					CD209 (DC-SIGN) signaling
		C-type lectin receptors (CLRs)					DAP12 interactions
		CD209 (DC-SIGN) signaling					DAP12 signaling
		CD28 dependent PI3K/Akt signaling					Downstream signal transduction
		DAP12 interactions					Downstream signaling of activated FGFR1
		DAP12 signaling					Downstream signaling of activated FGFR2
		Downstream signal transduction					Downstream signaling of activated FGFR3
		Downstream signaling of activated FGFR1					Downstream signaling of activated FGFR4
		Downstream signaling of activated FGFR2					EGFR Transactivation by Gastrin
		Downstream signaling of activated FGFR3					ERBB2 Activates PTK6 Signaling
		Downstream signaling of activated FGFR4					ERBB2 Regulates Cell Motility
		EGFR Transactivation by Gastrin					ESR-mediated signaling
		ESR-mediated signaling					Erythropoietin activates RAS
		Erythropoietin activates Phosphoinositide-3-kinase (PI3K)					Estrogen-stimulated signaling through PRKCZ
		Erythropoietin activates RAS					Extra-nuclear estrogen signaling
		Estrogen-stimulated signaling through PRKCZ					FLT3 Signaling
		Extra-nuclear estrogen signaling					FRS-mediated FGFR1 signaling
		FLT3 Signaling					FRS-mediated FGFR2 signaling
		FRS-mediated FGFR1 signaling					FRS-mediated FGFR3 signaling
		FRS-mediated FGFR2 signaling					FRS-mediated FGFR4 signaling
		FRS-mediated FGFR3 signaling					Formation of Senescence-Associated Heterochromatin Foci (SAHF)
		FRS-mediated FGFR4 signaling					GAB1 signalosome
		Fcgamma receptor (FCGR) dependent phagocytosis					GRB2 events in EGFR signaling
		G alpha (q) signalling events					GRB2 events in ERBB2 signaling
		GAB1 signalosome					Gastrin-CREB signalling pathway via PKC and MAPK
		GRB2 events in EGFR signaling					Generic Transcription Pathway
		GRB2 events in ERBB2 signaling					IGF1R signaling cascade
		Gastrin-CREB signalling pathway via PKC and MAPK					IRS-mediated signalling
		Generic Transcription Pathway					IRS-related events triggered by IGF1R
		IGF1R signaling cascade					Insulin receptor signalling cascade
		IRS-mediated signalling					Intracellular signaling by second messengers
		IRS-related events triggered by IGF1R					MAP2K and MAPK activation
		Innate Immune System					MAPK family signaling cascades
		Insulin receptor signalling cascade					MAPK1/MAPK3 signaling
		MAP2K and MAPK activation					MET activates RAS signaling
		MAPK family signaling cascades					NADPH regeneration
		MAPK1/MAPK3 signaling					Negative regulation of MAPK pathway
		MET activates PI3K/AKT signaling					Negative regulation of the PI3K/AKT network
		MET activates RAS signaling					PI-3K cascade:FGFR3
		NCAM signaling for neurite out-growth					PI3K events in ERBB2 signaling
		Negative regulation of MAPK pathway					PI3K events in ERBB4 signaling
		Negative regulation of the PI3K/AKT network					PI5P, PP2A and IER3 Regulate PI3K/AKT Signaling
		Nephrin family interactions					PIP3 activates AKT signaling
		Nervous system development					PTK6 Regulates RHO GTPases, RAS GTPase and MAP kinases
		PI-3K cascade:FGFR1					Post NMDA receptor activation events
		PI-3K cascade:FGFR2					RAF activation
		PI-3K cascade:FGFR3					RAF/MAP kinase cascade
		PI-3K cascade:FGFR4					RAS processing
		PI3K Cascade					RNA Polymerase II Transcription
		PI3K events in ERBB2 signaling					RUNX2 regulates osteoblast differentiation
		PI3K events in ERBB4 signaling					RUNX3 regulates CDKN1A transcription
		PI3K/AKT activation					Ras activation upon Ca2+ influx through NMDA receptor
		PI5P, PP2A and IER3 Regulate PI3K/AKT Signaling					Regulation of RAS by GAPs
		PIP3 activates AKT signaling					SHC-mediated cascade:FGFR1
		PTK6 Regulates RHO GTPases, RAS GTPase and MAP kinases					SHC-mediated cascade:FGFR2
		RAF activation					SHC-mediated cascade:FGFR3
		RAF/MAP kinase cascade					SHC-mediated cascade:FGFR4
		RAS processing					SHC-related events triggered by IGF1R
		RNA Polymerase II Transcription					SHC1 events in EGFR signaling
		RUNX2 regulates osteoblast differentiation					SHC1 events in ERBB2 signaling
		RUNX3 regulates CDKN1A transcription					SHC1 events in ERBB4 signaling
		Ras activation upon Ca2+ influx through NMDA receptor					SOS-mediated signalling
		Regulation of TP53 Activity					SUMO E3 ligases SUMOylate target proteins
		Regulation of TP53 Activity through Phosphorylation					SUMOylation
		Regulation of signaling by CBL					Signaling by EGFR
		SHC-mediated cascade:FGFR1					Signaling by ERBB2
		SHC-mediated cascade:FGFR2					Signaling by ERBB4
		SHC-mediated cascade:FGFR3					Signaling by Erythropoietin
		SHC-mediated cascade:FGFR4					Signaling by FGFR
		SHC-related events triggered by IGF1R					Signaling by FGFR1
		SHC1 events in EGFR signaling					Signaling by FGFR2
		SHC1 events in ERBB2 signaling					Signaling by FGFR3
		SHC1 events in ERBB4 signaling					Signaling by FGFR4
		SOS-mediated signalling					Signaling by Insulin receptor
		Signaling by EGFR					Signaling by MET
		Signaling by ERBB2					Signaling by NTRK1 (TRKA)
		Signaling by ERBB4					Signaling by NTRK2 (TRKB)
		Signaling by Erythropoietin					Signaling by NTRK3 (TRKC)
		Signaling by FGFR					Signaling by NTRKs
		Signaling by FGFR1					Signaling by Non-Receptor Tyrosine Kinases
		Signaling by FGFR2					Signaling by Nuclear Receptors
		Signaling by FGFR3					Signaling by PDGF
		Signaling by FGFR4					Signaling by PTK6
		Signaling by Insulin receptor					Signaling by Receptor Tyrosine Kinases
		Signaling by MET					Signaling by SCF-KIT
		Signaling by NTRK1 (TRKA)					Signaling by Type 1 Insulin-like Growth Factor 1 Receptor (IGF1R)
		Signaling by NTRK2 (TRKB)					Signalling to ERKs
		Signaling by NTRK3 (TRKC)					Signalling to RAS
		Signaling by NTRKs					Tie2 Signaling
		Signaling by Non-Receptor Tyrosine Kinases					Transcriptional regulation by RUNX3
		Signaling by Nuclear Receptors					VEGFA-VEGFR2 Pathway
		Signaling by PDGF					VEGFR2 mediated cell proliferation
		Signaling by PTK6					p38MAPK events
		Signaling by Receptor Tyrosine Kinases
		Signaling by SCF-KIT
		Signaling by Type 1 Insulin-like Growth Factor 1 Receptor (IGF1R)
		Signaling by VEGF
		Signalling to ERKs
		Signalling to RAS
		Tie2 Signaling
		Transcriptional regulation by RUNX3
		VEGFA-VEGFR2 Pathway
		VEGFR2 mediated cell proliferation
		p38MAPK events
	SARC	Activated NTRK2 signals through PI3K			RUNX3 regulates p14-ARF	Intracellular signaling by second messengers	Activated NTRK2 signals through PI3K
		Activated NTRK3 signals through PI3K			Transcriptional regulation by RUNX3	MAPK family signaling cascades	Activated NTRK3 signals through PI3K
		Apoptotic cleavage of cell adhesion proteins				PIP3 activates AKT signaling	Activation of HOX genes during differentiation
		Axon guidance				Signaling by Non-Receptor Tyrosine Kinases	Activation of anterior HOX genes in hindbrain development during early embryogenesis
		CD28 co-stimulation				Signaling by Nuclear Receptors	FLT3 Signaling
		CD28 dependent PI3K/Akt signaling				Signaling by PTK6	MET activates PI3K/AKT signaling
		Chromatin modifying enzymes					PI3K events in ERBB2 signaling
		DAP12 interactions					PI3K events in ERBB4 signaling
		DAP12 signaling					Signaling by ERBB2
		Deactivation of the beta-catenin transactivating complex
		Downregulation of ERBB2:ERBB3 signaling
		Downstream TCR signaling
		Downstream signal transduction
		Downstream signaling of activated FGFR1
		Downstream signaling of activated FGFR2
		Downstream signaling of activated FGFR3
		Downstream signaling of activated FGFR4
		ESR-mediated signaling
		Erythropoietin activates Phosphoinositide-3-kinase (PI3K)
		Extra-nuclear estrogen signaling
		FLT3 Signaling
		GAB1 signalosome
		GPVI-mediated activation cascade
		Generic Transcription Pathway
		IGF1R signaling cascade
		IRS-mediated signalling
		IRS-related events triggered by IGF1R
		Insulin receptor signalling cascade
		Interleukin receptor SHC signaling
		Interleukin-2 family signaling
		Interleukin-3, Interleukin-5 and GM-CSF signaling
		Intracellular signaling by second messengers
		MET activates PI3K/AKT signaling
		Negative regulation of the PI3K/AKT network
		Nephrin family interactions
		Nervous system development
		PI Metabolism
		PI3K Cascade
		PI3K events in ERBB2 signaling
		PI3K events in ERBB4 signaling
		PI3K/AKT activation
		PI5P, PP2A and IER3 Regulate PI3K/AKT Signaling
		PIP3 activates AKT signaling
		PKMTs methylate histone lysines
		RET signaling
		RHO GTPases activate IQGAPs
		RNA Polymerase II Transcription
		RUNX1 regulates genes involved in megakaryocyte differentiation and platelet function
		Regulation of signaling by CBL
		Signaling by EGFR
		Signaling by ERBB2
		Signaling by ERBB4
		Signaling by Erythropoietin
		Signaling by FGFR1
		Signaling by FGFR3
		Signaling by FGFR4
		Signaling by Insulin receptor
		Signaling by MET
		Signaling by NTRK1 (TRKA)
		Signaling by NTRK2 (TRKB)
		Signaling by NTRK3 (TRKC)
		Signaling by NTRKs
		Signaling by Nuclear Receptors
		Signaling by PDGF
		Signaling by Receptor Tyrosine Kinases
		Signaling by SCF-KIT
		Signaling by Type 1 Insulin-like Growth Factor 1 Receptor (IGF1R)
		Signaling by VEGF
		Signaling by WNT
		Synthesis of PIPs at the plasma membrane
		TCF dependent signaling in response to WNT
		TCR signaling
		Tie2 Signaling
		Transcriptional regulation by RUNX1
		VEGFA-VEGFR2 Pathway
	SKCM	Activated NTRK2 signals through FRS2 and FRS3		Chromatin modifying enzymes			Activated NTRK2 signals through FRS2 and FRS3
		Activated NTRK2 signals through RAS					Activated NTRK2 signals through RAS
		Activated NTRK3 signals through RAS					Activated NTRK3 signals through RAS
		Activation of NMDA receptors and postsynaptic events					Activation of NMDA receptors and postsynaptic events
		Activation of PUMA and translocation to mitochondria					Activation of PUMA and translocation to mitochondria
		Activation of RAS in B cells					Activation of RAS in B cells
		C-type lectin receptors (CLRs)					C-type lectin receptors (CLRs)
		CD209 (DC-SIGN) signaling					CD209 (DC-SIGN) signaling
		DAP12 interactions					DAP12 interactions
		DAP12 signaling					DAP12 signaling
		Downstream signal transduction					Downstream signal transduction
		Downstream signaling events of B Cell Receptor (BCR)					Downstream signaling of activated FGFR1
		Downstream signaling of activated FGFR1					Downstream signaling of activated FGFR2
		Downstream signaling of activated FGFR2					Downstream signaling of activated FGFR3
		Downstream signaling of activated FGFR3					Downstream signaling of activated FGFR4
		Downstream signaling of activated FGFR4					EGFR Transactivation by Gastrin
		EGFR Transactivation by Gastrin					ESR-mediated signaling
		Erythropoietin activates RAS					Erythropoietin activates RAS
		Estrogen-stimulated signaling through PRKCZ					Estrogen-stimulated signaling through PRKCZ
		Extra-nuclear estrogen signaling					Extra-nuclear estrogen signaling
		FLT3 Signaling					FLT3 Signaling
		FRS-mediated FGFR3 signaling					FRS-mediated FGFR3 signaling
		FRS-mediated FGFR4 signaling					G2/M DNA damage checkpoint
		GRB2 events in EGFR signaling					GRB2 events in EGFR signaling
		GRB2 events in ERBB2 signaling					GRB2 events in ERBB2 signaling
		Gastrin-CREB signalling pathway via PKC and MAPK					Gastrin-CREB signalling pathway via PKC and MAPK
		Generic Transcription Pathway					Generic Transcription Pathway
		IGF1R signaling cascade					IGF1R signaling cascade
		IRS-mediated signalling					IRS-mediated signalling
		IRS-related events triggered by IGF1R					IRS-related events triggered by IGF1R
		Innate Immune System					Insulin receptor signalling cascade
		Insulin receptor signalling cascade					Intracellular signaling by second messengers
		MAP2K and MAPK activation					MAP2K and MAPK activation
		MAPK family signaling cascades					MAPK family signaling cascades
		MAPK1/MAPK3 signaling					MAPK1/MAPK3 signaling
		MET activates RAS signaling					MET activates RAS signaling
		NOTCH4 Intracellular Domain Regulates Transcription					Negative regulation of MAPK pathway
		Negative regulation of MAPK pathway					PI3K events in ERBB2 signaling
		PIP3 activates AKT signaling					PI3K events in ERBB4 signaling
		PTK6 Regulates RHO GTPases, RAS GTPase and MAP kinases					PIP3 activates AKT signaling
		Post NMDA receptor activation events					PTK6 Regulates RHO GTPases, RAS GTPase and MAP kinases
		Pre-NOTCH Transcription and Translation					Post NMDA receptor activation events
		RAF activation					RAF activation
		RAF/MAP kinase cascade					RAF/MAP kinase cascade
		RAS processing					RAS processing
		RNA Polymerase II Transcription					RNA Polymerase II Transcription
		RUNX1 regulates transcription of genes involved in differentiation of myeloid cells					Ras activation upon Ca2+ influx through NMDA receptor
		RUNX3 regulates CDKN1A transcription					Regulation of TP53 Activity
		Ras activation upon Ca2+ influx through NMDA receptor					Regulation of TP53 Activity through Association with Co-factors
		Regulation of PTEN gene transcription					Regulation of TP53 Activity through Methylation
		Regulation of RAS by GAPs					SHC-mediated cascade:FGFR1
		Regulation of TP53 Activity through Association with Co-factors					SHC-mediated cascade:FGFR3
		SHC-mediated cascade:FGFR1					SHC-mediated cascade:FGFR4
		SHC-mediated cascade:FGFR3					SHC-related events triggered by IGF1R
		SHC-mediated cascade:FGFR4					SHC1 events in EGFR signaling
		SHC-related events triggered by IGF1R					SHC1 events in ERBB2 signaling
		SHC1 events in EGFR signaling					SHC1 events in ERBB4 signaling
		SHC1 events in ERBB2 signaling					SOS-mediated signalling
		SHC1 events in ERBB4 signaling					Signaling by EGFR
		SOS-mediated signalling					Signaling by ERBB2
		Scavenging by Class A Receptors					Signaling by ERBB4
		Signaling by EGFR					Signaling by Erythropoietin
		Signaling by ERBB2					Signaling by FGFR
		Signaling by ERBB4					Signaling by FGFR1
		Signaling by Erythropoietin					Signaling by FGFR2
		Signaling by FGFR					Signaling by FGFR3
		Signaling by FGFR1					Signaling by FGFR4
		Signaling by FGFR2					Signaling by Insulin receptor
		Signaling by FGFR3					Signaling by MET
		Signaling by FGFR4					Signaling by NTRK1 (TRKA)
		Signaling by Insulin receptor					Signaling by NTRK2 (TRKB)
		Signaling by MET					Signaling by NTRK3 (TRKC)
		Signaling by NTRK1 (TRKA)					Signaling by NTRKs
		Signaling by NTRK2 (TRKB)					Signaling by Non-Receptor Tyrosine Kinases
		Signaling by NTRK3 (TRKC)					Signaling by Nuclear Receptors
		Signaling by NTRKs					Signaling by PDGF
		Signaling by PDGF					Signaling by PTK6
		Signaling by Receptor Tyrosine Kinases					Signaling by Receptor Tyrosine Kinases
		Signaling by SCF-KIT					Signaling by SCF-KIT
		Signaling by Type 1 Insulin-like Growth Factor 1 Receptor (IGF1R)					Signaling by Type 1 Insulin-like Growth Factor 1 Receptor (IGF1R)
		Signaling by VEGF					Signaling by VEGF
		Signalling to ERKs					Signalling to ERKs
		Signalling to RAS					Signalling to RAS
		TP53 Regulates Transcription of Caspase Activators and Caspases					TP53 Regulates Transcription of Caspase Activators and Caspases
		TP53 Regulates Transcription of Cell Death Genes					TP53 Regulates Transcription of Cell Death Genes
		TP53 Regulates Transcription of Death Receptors and Ligands					TP53 Regulates Transcription of DNA Repair Genes
		TP53 Regulates Transcription of Genes Involved in Cytochrome C Release					TP53 Regulates Transcription of Death Receptors and Ligands
		TP53 regulates transcription of several additional cell death genes whose specific roles in p53-dependent apoptosis remain uncertain					TP53 Regulates Transcription of Genes Involved in Cytochrome C Release
		Terminal pathway of complement					TP53 regulates transcription of several additional cell death genes whose specific roles in p53-dependent apoptosis remain uncertain
		Tie2 Signaling					Tie2 Signaling
		Transcriptional regulation by RUNX3					Transcriptional Regulation by TP53
		VEGFA-VEGFR2 Pathway					Transmission across Chemical Synapses
		VEGFR2 mediated cell proliferation					VEGFR2 mediated cell proliferation
		p38MAPK events					p38MAPK events
	STAD	Activated NTRK2 signals through RAS	Chromatin modifying enzymes		Cell Cycle Checkpoints
		Activated NTRK3 signals through RAS
		Activation of RAS in B cells
		Axon guidance
		Chromatin modifying enzymes
		DAP12 interactions
		DAP12 signaling
		Downstream signal transduction
		EGFR Transactivation by Gastrin
		Estrogen-stimulated signaling through PRKCZ
		MAP2K and MAPK activation
		Negative regulation of MAPK pathway
		Nervous system development
		PI3K/AKT activation
		PTK6 Regulates RHO GTPases, RAS GTPase and MAP kinases
		RAF activation
		RUNX3 regulates CDKN1A transcription
		SHC-related events triggered by IGF1R
		SOS-mediated signalling
		Signaling by Erythropoietin
		Signaling by FGFR3
		Signaling by FGFR4
		Signaling by NTRK1 (TRKA)
		Signaling by NTRKs
		Signaling by TGFB family members
		Signaling by VEGF
		Signalling to ERKs
		Tie2 Signaling
		Transcriptional activation of cell cycle inhibitor p21
		Transcriptional activation of p53 responsive genes
		Transcriptional regulation by RUNX3
		VEGFA-VEGFR2 Pathway
	THCA	Activated NTRK2 signals through FRS2 and FRS3			Transcriptional regulation by RUNX3		Activated NTRK2 signals through FRS2 and FRS3
		Activated NTRK2 signals through RAS					Activated NTRK2 signals through RAS
		Activated NTRK3 signals through RAS					Activated NTRK3 signals through RAS
		Activation of NMDA receptors and postsynaptic events					Activation of NMDA receptors and postsynaptic events
		Activation of PUMA and translocation to mitochondria					Activation of PUMA and translocation to mitochondria
		Activation of RAS in B cells					Activation of RAS in B cells
		Adaptive Immune System					Adaptive Immune System
		C-type lectin receptors (CLRs)					Axon guidance
		CD209 (DC-SIGN) signaling					C-type lectin receptors (CLRs)
		CREB1 phosphorylation through NMDA receptor-mediated activation of RAS signaling					CD209 (DC-SIGN) signaling
		Chromatin modifying enzymes					CREB1 phosphorylation through NMDA receptor-mediated activation of RAS signaling
		DAP12 interactions					DAP12 interactions
		DAP12 signaling					DAP12 signaling
		Downstream signal transduction					Downstream signal transduction
		Downstream signaling events of B Cell Receptor (BCR)					Downstream signaling events of B Cell Receptor (BCR)
		Downstream signaling of activated FGFR1					Downstream signaling of activated FGFR1
		Downstream signaling of activated FGFR2					Downstream signaling of activated FGFR2
		Downstream signaling of activated FGFR3					Downstream signaling of activated FGFR3
		Downstream signaling of activated FGFR4					Downstream signaling of activated FGFR4
		EGFR Transactivation by Gastrin					EGFR Transactivation by Gastrin
		Erythropoietin activates Phosphoinositide-3-kinase (PI3K)					Erythropoietin activates Phosphoinositide-3-kinase (PI3K)
		Erythropoietin activates RAS					Erythropoietin activates RAS
		Estrogen-stimulated signaling through PRKCZ					Estrogen-stimulated signaling through PRKCZ
		Extra-nuclear estrogen signaling					Extra-nuclear estrogen signaling
		FLT3 Signaling					FLT3 Signaling
		FRS-mediated FGFR1 signaling					FRS-mediated FGFR1 signaling
		FRS-mediated FGFR2 signaling					FRS-mediated FGFR2 signaling
		FRS-mediated FGFR3 signaling					FRS-mediated FGFR3 signaling
		FRS-mediated FGFR4 signaling					FRS-mediated FGFR4 signaling
		GRB2 events in EGFR signaling					Fc epsilon receptor (FCERI) signaling
		GRB2 events in ERBB2 signaling					GRB2 events in EGFR signaling
		Gastrin-CREB signalling pathway via PKC and MAPK					GRB2 events in ERBB2 signaling
		Generic Transcription Pathway					Gastrin-CREB signalling pathway via PKC and MAPK
		IGF1R signaling cascade					IGF1R signaling cascade
		IRS-mediated signalling					IRS-mediated signalling
		IRS-related events triggered by IGF1R					IRS-related events triggered by IGF1R
		Innate Immune System					Insulin receptor signalling cascade
		Insulin receptor signalling cascade					MAP2K and MAPK activation
		MAP2K and MAPK activation					MAPK family signaling cascades
		MAPK family signaling cascades					MAPK1/MAPK3 signaling
		MAPK1/MAPK3 signaling					MET activates RAS signaling
		MET activates RAS signaling					NCAM signaling for neurite out-growth
		NCAM signaling for neurite out-growth					Negative regulation of MAPK pathway
		Negative regulation of MAPK pathway					Nervous system development
		PKMTs methylate histone lysines					PTK6 Regulates RHO GTPases, RAS GTPase and MAP kinases
		PTEN Regulation					Post NMDA receptor activation events
		PTK6 Regulates RHO GTPases, RAS GTPase and MAP kinases					RAF activation
		Post NMDA receptor activation events					RAF/MAP kinase cascade
		RAF activation					RAS processing
		RAF/MAP kinase cascade					RHO GTPases activate PAKs
		RAS processing					RUNX3 regulates CDKN1A transcription
		RNA Polymerase II Transcription					Ras activation upon Ca2+ influx through NMDA receptor
		RUNX3 regulates CDKN1A transcription					Regulation of RAS by GAPs
		Ras activation upon Ca2+ influx through NMDA receptor					Regulation of TP53 Activity through Association with Co-factors
		Regulation of PTEN gene transcription					SHC-mediated cascade:FGFR1
		Regulation of RAS by GAPs					SHC-mediated cascade:FGFR2
		Regulation of TP53 Activity through Association with Co-factors					SHC-mediated cascade:FGFR3
		SHC-mediated cascade:FGFR1					SHC-mediated cascade:FGFR4
		SHC-mediated cascade:FGFR2					SHC-related events triggered by IGF1R
		SHC-mediated cascade:FGFR3					SHC1 events in EGFR signaling
		SHC-mediated cascade:FGFR4					SHC1 events in ERBB2 signaling
		SHC-related events triggered by IGF1R					SHC1 events in ERBB4 signaling
		SHC1 events in EGFR signaling					SOS-mediated signalling
		SHC1 events in ERBB2 signaling					Signaling by EGFR
		SHC1 events in ERBB4 signaling					Signaling by ERBB2
		SOS-mediated signalling					Signaling by ERBB4
		Signaling by EGFR					Signaling by Erythropoietin
		Signaling by ERBB2					Signaling by FGFR
		Signaling by ERBB4					Signaling by FGFR1
		Signaling by Erythropoietin					Signaling by FGFR2
		Signaling by FGFR					Signaling by FGFR3
		Signaling by FGFR1					Signaling by FGFR4
		Signaling by FGFR2					Signaling by Insulin receptor
		Signaling by FGFR3					Signaling by MET
		Signaling by FGFR4					Signaling by NTRK1 (TRKA)
		Signaling by Insulin receptor					Signaling by NTRK2 (TRKB)
		Signaling by MET					Signaling by NTRK3 (TRKC)
		Signaling by NTRK1 (TRKA)					Signaling by NTRKs
		Signaling by NTRK2 (TRKB)					Signaling by Non-Receptor Tyrosine Kinases
		Signaling by NTRK3 (TRKC)					Signaling by PDGF
		Signaling by NTRKs					Signaling by PTK6
		Signaling by Non-Receptor Tyrosine Kinases					Signaling by SCF-KIT
		Signaling by PDGF					Signaling by Type 1 Insulin-like Growth Factor 1 Receptor (IGF1R)
		Signaling by PTK6					Signaling by VEGF
		Signaling by Receptor Tyrosine Kinases					Signalling to ERKs
		Signaling by SCF-KIT					Signalling to RAS
		Signaling by Type 1 Insulin-like Growth Factor 1 Receptor (IGF1R)					TCR signaling
		Signaling by VEGF					TP53 Regulates Transcription of Caspase Activators and Caspases
		Signalling to ERKs					TP53 Regulates Transcription of DNA Repair Genes
		Signalling to RAS					TP53 Regulates Transcription of Death Receptors and Ligands
		TP53 Regulates Transcription of Caspase Activators and Caspases					TP53 Regulates Transcription of Genes Involved in Cytochrome C Release
		TP53 Regulates Transcription of Death Receptors and Ligands					TP53 regulates transcription of several additional cell death genes whose specific roles in p53-dependent apoptosis remain uncertain
		TP53 Regulates Transcription of Genes Involved in Cytochrome C Release					Tie2 Signaling
		TP53 regulates transcription of several additional cell death genes whose specific roles in p53-dependent apoptosis remain uncertain					VEGFA-VEGFR2 Pathway
		Tie2 Signaling					VEGFR2 mediated cell proliferation
		Transcriptional regulation by RUNX3					p38MAPK events
		Ub-specific processing proteases
		VEGFA-VEGFR2 Pathway
		VEGFR2 mediated cell proliferation
		p38MAPK events
	UCEC	Activated NTRK2 signals through PI3K		Chromatin modifying enzymes	Intracellular signaling by second messengers	Activated NTRK2 signals through PI3K	AKT phosphorylates targets in the nucleus
		Activated NTRK3 signals through PI3K		Generic Transcription Pathway	PIP3 activates AKT signaling	Activated NTRK3 signals through PI3K	Activated NTRK2 signals through PI3K
		Axon guidance		RNA Polymerase II Transcription		Cytokine Signaling in Immune system	Activated NTRK3 signals through PI3K
		Beta-catenin phosphorylation cascade				Downstream signaling of activated FGFR3	Axon guidance
		CD28 co-stimulation				ESR-mediated signaling	CD28 co-stimulation
		CD28 dependent PI3K/Akt signaling				Erythropoietin activates Phosphoinositide-3-kinase (PI3K)	CD28 dependent PI3K/Akt signaling
		Costimulation by the CD28 family				Extra-nuclear estrogen signaling	Costimulation by the CD28 family
		DAP12 interactions				FLT3 Signaling	Downstream signal transduction
		DAP12 signaling				IGF1R signaling cascade	ESR-mediated signaling
		Deactivation of the beta-catenin transactivating complex				IRS-mediated signalling	Erythropoietin activates Phosphoinositide-3-kinase (PI3K)
		Disassembly of the destruction complex and recruitment of AXIN to the membrane				IRS-related events triggered by IGF1R	Estrogen-dependent nuclear events downstream of ESR-membrane signaling
		Downregulation of ERBB2:ERBB3 signaling				Insulin receptor signalling cascade	Extra-nuclear estrogen signaling
		Downstream signal transduction				Interleukin-3, Interleukin-5 and GM-CSF signaling	FLT3 Signaling
		Downstream signaling of activated FGFR1				Intracellular signaling by second messengers	GAB1 signalosome
		Downstream signaling of activated FGFR2				MET activates PI3K/AKT signaling	Generic Transcription Pathway
		Downstream signaling of activated FGFR3				Negative regulation of FGFR3 signaling	Interleukin-4 and Interleukin-13 signaling
		Downstream signaling of activated FGFR4				Negative regulation of the PI3K/AKT network	Intracellular signaling by second messengers
		ESR-mediated signaling				PI-3K cascade:FGFR3	MAPK family signaling cascades
		Erythropoietin activates Phosphoinositide-3-kinase (PI3K)				PI3K Cascade	MAPK1/MAPK3 signaling
		Extra-nuclear estrogen signaling				PI3K events in ERBB4 signaling	MET activates PI3K/AKT signaling
		FLT3 Signaling				PI3K/AKT activation	Negative regulation of the PI3K/AKT network
		Generic Transcription Pathway				PI5P, PP2A and IER3 Regulate PI3K/AKT Signaling	Nervous system development
		IGF1R signaling cascade				PIP3 activates AKT signaling	PI3K events in ERBB2 signaling
		IRS-mediated signalling				RUNX1 regulates transcription of genes involved in WNT signaling	PI3K events in ERBB4 signaling
		IRS-related events triggered by IGF1R				RUNX1 regulates transcription of genes involved in differentiation of myeloid cells	PI3K/AKT activation
		Insulin receptor signalling cascade				RUNX2 regulates bone development	PI5P, PP2A and IER3 Regulate PI3K/AKT Signaling
		Intracellular signaling by second messengers				RUNX2 regulates osteoblast differentiation	PIP3 activates AKT signaling
		MAPK family signaling cascades				Regulation of signaling by CBL	RAF/MAP kinase cascade
		MAPK1/MAPK3 signaling				Signaling by EGFR	RNA Polymerase II Transcription
		MET activates PI3K/AKT signaling				Signaling by FGFR	Regulation of TP53 Activity through Association with Co-factors
		NCAM signaling for neurite out-growth				Signaling by FGFR1	Regulation of TP53 Degradation
		Negative regulation of FGFR1 signaling				Signaling by FGFR2	Regulation of TP53 Expression and Degradation
		Negative regulation of FGFR2 signaling				Signaling by FGFR3	Regulation of localization of FOXO transcription factors
		Negative regulation of MAPK pathway				Signaling by FGFR4	Signaling by EGFR
		Negative regulation of the PI3K/AKT network				Signaling by Insulin receptor	Signaling by ERBB2
		Nervous system development				Signaling by Nuclear Receptors	Signaling by FGFR
		Ovarian tumor domain proteases				Signaling by Receptor Tyrosine Kinases	Signaling by FGFR1
		PI-3K cascade:FGFR1				Signaling by SCF-KIT	Signaling by FGFR2
		PI-3K cascade:FGFR2				Signaling by VEGF	Signaling by FGFR3
		PI3K Cascade				Transcriptional regulation by RUNX2	Signaling by FGFR4
		PI3K events in ERBB4 signaling				VEGFA-VEGFR2 Pathway	Signaling by NOTCH
		PI3K/AKT activation					Signaling by NTRK1 (TRKA)
		PI5P, PP2A and IER3 Regulate PI3K/AKT Signaling					Signaling by Nuclear Receptors
		PIP3 activates AKT signaling					Signaling by PDGF
		RAF activation					Signaling by Receptor Tyrosine Kinases
		RAF/MAP kinase cascade					Signaling by VEGF
		RNA Polymerase II Transcription					Synthesis of PIPs at the plasma membrane
		Regulation of FZD by ubiquitination					TCF dependent signaling in response to WNT
		Regulation of PTEN gene transcription					TCR signaling
		Regulation of TP53 Activity					Transcriptional regulation by RUNX2
		Regulation of TP53 Activity through Acetylation					VEGFA-VEGFR2 Pathway
		Regulation of TP53 Activity through Association with Co-factors
		Regulation of TP53 Degradation
		Regulation of TP53 Expression and Degradation
		Signaling by EGFR
		Signaling by ERBB2
		Signaling by ERBB4
		Signaling by Erythropoietin
		Signaling by FGFR
		Signaling by FGFR1
		Signaling by FGFR2
		Signaling by FGFR3
		Signaling by FGFR4
		Signaling by Insulin receptor
		Signaling by MET
		Signaling by NTRK1 (TRKA)
		Signaling by NTRK2 (TRKB)
		Signaling by NTRK3 (TRKC)
		Signaling by NTRKs
		Signaling by PDGF
		Signaling by Receptor Tyrosine Kinases
		Signaling by SCF-KIT
		Signaling by Type 1 Insulin-like Growth Factor 1 Receptor (IGF1R)
		Signaling by VEGF
		Signaling by WNT
		Synthesis of PIPs at the plasma membrane
		TCF dependent signaling in response to WNT
		Tie2 Signaling
		VEGFA-VEGFR2 Pathway

## Sheet: Supplementary Data 2d
Supplementary Data 2d: unique pathways per model according to REACTOME	Non-Silent	Synonymous	Intron	Flank	UTR	All
	Activation of the TFAP2 (AP-2) family of transcription factors	Antiviral mechanism by IFN-stimulated genes	RUNX1 interacts with co-factors whose precise effect on RUNX1 targets is not known	RHO GTPases Activate Formins	Negative regulation of FGFR3 signaling	AKT phosphorylates targets in the nucleus
	Apoptotic cleavage of cell adhesion proteins	Aryl hydrocarbon receptor signalling	Sema4D in semaphorin signaling	RUNX1 and FOXP3 control the development of regulatory T lymphocytes (Tregs)		DNA Double-Strand Break Repair
	Attenuation phase	EGFR interacts with phospholipase C-gamma	Sema4D induced cell migration and growth-cone collapse	RUNX1 regulates estrogen receptor mediated transcription		Estrogen-dependent nuclear events downstream of ESR-membrane signaling
	Cytosolic sensors of pathogen-associated DNA	Interferon Signaling		Signaling by Rho GTPases		Fc epsilon receptor (FCERI) signaling
	DNA Damage/Telomere Stress Induced Senescence	Nuclear Pore Complex (NPC) Disassembly				G1/S DNA Damage Checkpoints
	Deactivation of the beta-catenin transactivating complex	Regulation of Glucokinase by Glucokinase Regulatory Protein				G2/M DNA damage checkpoint
	Downregulation of ERBB2:ERBB3 signaling	SUMOylation of DNA replication proteins				Myogenesis
	Downstream TCR signaling	SUMOylation of RNA binding proteins				NADPH regeneration
	FOXO-mediated transcription of cell death genes	SUMOylation of SUMOylation proteins				Regulation of localization of FOXO transcription factors
	Fcgamma receptor (FCGR) dependent phagocytosis	SUMOylation of ubiquitinylation proteins				SUMOylation of DNA damage response and repair proteins
	Formation of the beta-catenin:TCF transactivating complex	Transport of the SLBP Dependant Mature mRNA				Stabilization of p53
	G alpha (q) signalling events	Transport of the SLBP independent Mature mRNA				TP53 Regulates Transcription of DNA Repair Genes
	GP1b-IX-V activation signalling					Transmission across Chemical Synapses
	GPVI-mediated activation cascade					p53-Dependent G1 DNA Damage Response
	Interleukin receptor SHC signaling					p53-Dependent G1/S DNA damage checkpoint
	Interleukin-2 family signaling
	LRR FLII-interacting protein 1 (LRRFIP1) activates type I IFN production
	NOTCH3 Intracellular Domain Regulates Transcription
	Negative feedback regulation of MAPK pathway
	Negative regulation of FGFR1 signaling
	Negative regulation of FGFR2 signaling
	Nephrin family interactions
	PI Metabolism
	PI-3K cascade:FGFR1
	PI-3K cascade:FGFR2
	PI-3K cascade:FGFR4
	Pre-NOTCH Expression and Processing
	Pre-NOTCH Transcription and Translation
	RET signaling
	RHO GTPases activate IQGAPs
	RUNX3 regulates NOTCH signaling
	Regulation of FOXO transcriptional activity by acetylation
	Regulation of FZD by ubiquitination
	Regulation of PTEN localization
	Regulation of TP53 Activity through Acetylation
	Regulation of gene expression by Hypoxia-inducible Factor
	Regulation of gene expression in late stage (branching morphogenesis) pancreatic bud precursor cells
	Scavenging by Class A Receptors
	Signaling by NOTCH3
	Signaling by TGFB family members
	Signaling by WNT
	TFAP2 (AP-2) family regulates transcription of growth factors and their receptors
	TP53 Regulates Transcription of Genes Involved in G1 Cell Cycle Arrest
	TRAF3-dependent IRF activation pathway
	Terminal pathway of complement
	The role of GTSE1 in G2/M progression after G2 checkpoint
	Transcriptional Regulation by VENTX
	Ub-specific processing proteases
