# Supplementary material for: Estimating the predictive power of silent mutations on cancer classification and prognosis
Source: NPJ Genom Med. 2021 Aug 12;6:67. doi: 10.1038/s41525-021-00229-1 (PMC8361094; doi:10.1038/s41525-021-00229-1)
Supplement: Supplementary file 4 — Supplementary Data 3 [file 41525_2021_229_MOESM4_ESM.xlsx]

## Sheet: Supplementary Data 3
Supplementary Data 3: Feature importance obtained from the 6 survival estimating models.
Model	All-Features			Non-Silent			Intron			UTR			Flank			Synonymous
	Feature	Importance	Gene	Feature	Importance	Gene	Feature	Importance	Gene	Feature	Importance	Gene	Feature	Importance	Gene	Feature	Importance	Gene
0	TP53 Non_Silent	0.0142413	TP53	TP53 Non_Silent	0.0264934	TP53	143147221-143147222-chr5-Intron-INS-----C	0.0107219	ARHGAP26	40554659-40554659-chr17-3'UTR-SNP-A-A-G	0.0246968	CCR7	DUX4 Flank	0.0549161	DUX4	195785775-195785775-chr3-Synonymous-SNP-C-C-G	0.0201273	MUC4
1	MUC4 Non_Silent	0.00497519	MUC4	MUC4 Non_Silent	0.012834	MUC4	92956452-92956452-chr15-Splice_Region-SNP-A-A-T	0.00705622	CHD2	256477-256477-chr5-3'UTR-SNP-T-T-C	0.0134243	SDHA	23627049-23627050-chr1-5'Flank-DEL-GA-GA--	0.034263	MDS2	MUC4 Synonymous	0.0152084	MUC4
2	57466291-57466292-chr12-Frame_Shift_Ins-INS-----G	0.00490411	GLI1	57466291-57466292-chr12-Frame_Shift_Ins-INS-----G	0.00968984	GLI1	CR1 Intron	0.00693416	CR1	HIP1 UTR	0.010686	HIP1	MALAT1 Flank	0.0308323	MALAT1	28695853-28695853-chr22-Synonymous-SNP-G-G-A	0.0125894	CHEK2
3	143147221-143147222-chr5-Intron-INS-----C	0.00353418	ARHGAP26	140753336-140753336-chr7-Missense_Mutation-SNP-A-A-T	0.00876146	BRAF	KDM6A Intron	0.00400503	KDM6A	ETV6 UTR	0.0104151	ETV6	MDS2 Flank	0.0283314	MDS2	CSMD3 Synonymous	0.0115748	CSMD3
4	140753336-140753336-chr7-Missense_Mutation-SNP-A-A-T	0.0032283	BRAF	EGFR Non_Silent	0.00732371	EGFR	25666102-25666105-chr4-Intron-DEL-TTTG-TTTG--	0.00399748	SLC34A2	PSIP1 UTR	0.010196	PSIP1	33010638-33010638-chr1-3'Flank-SNP-T-T-C	0.0281771	AK2	195786336-195786336-chr3-Synonymous-SNP-A-A-G	0.0103093	MUC4
5	NKX2-1 Flank	0.00309539	NKX2-1	BAP1 Non_Silent	0.00714637	BAP1	60918385-60918385-chr2-Intron-SNP-A-A-T	0.0037936	REL	CSF3R UTR	0.00869219	CSF3R	33010786-33010786-chr1-3'Flank-SNP-C-C-T	0.0268725	AK2	ALK Synonymous	0.00907736	ALK
6	25743660-25743660-chr2-Missense_Mutation-SNP-T-T-G	0.00265957	ASXL2	35457937-35457938-chr6-Frame_Shift_Ins-INS-----C	0.00612024	FANCE	PARG Intron	0.00356972	PARG	TBL1X UTR	0.00795104	TBL1X	TPM4 Flank	0.0245838	TPM4	FLT4 Synonymous	0.00859889	FLT4
7	EGFR Non_Silent	0.00264898	EGFR	99175207-99175209-chr14-In_Frame_Del-DEL-CTC-CTC--	0.00609516	BCL11B	6679370-6679370-chr19-Intron-SNP-G-G-T	0.00355869	C3	IL21R UTR	0.00741422	IL21R	TERT Flank	0.0203123	TERT	CNTRL Synonymous	0.00769039	CNTRL
8	92956452-92956452-chr15-Splice_Region-SNP-A-A-T	0.00264489	CHD2	IDH1 Non_Silent	0.00502808	IDH1	2945728-2945735-chr7-Intron-DEL-ACACACAC-ACACACAC--	0.00346256	CARD11	KDM5A UTR	0.00715911	KDM5A	WWP2 Flank	0.0178822	WWP2	50475594-50475594-chr12-Synonymous-SNP-G-G-C	0.00709453	LARP4
9	35457937-35457938-chr6-Frame_Shift_Ins-INS-----C	0.00256845	FANCE	PTEN Non_Silent	0.00493405	PTEN	44782363-44782363-chr19-Splice_Region-SNP-A-A-C	0.00343495	CBLC	125189745-125189747-chr9-5'UTR-DEL-GCG-GCG--	0.00710638	PPP6C	HOXD13 Flank	0.0169614	HOXD13	108755015-108755015-chr2-Synonymous-SNP-A-A-G	0.00702312	RANBP2
10	25666102-25666105-chr4-Intron-DEL-TTTG-TTTG--	0.00248189	SLC34A2	BRAF Non_Silent	0.00483934	BRAF	201285360-201285361-chr2-Intron-INS-----C	0.0032877	CASP8	RARA UTR	0.00696189	RARA	MUC1 Flank	0.0159058	MUC1	152156320-152156320-chr7-Synonymous-SNP-T-T-G	0.0069039	KMT2C
11	PTEN Non_Silent	0.00230732	PTEN	FKBP9 Non_Silent	0.00483706	FKBP9	20136232-20136233-chrX-Intron-DEL-CA-CA--	0.00322024	EIF1AX	50400985-50400985-chr12-5'UTR-SNP-A-A-G	0.00694586	LARP4	GRIN2A Flank	0.0152887	GRIN2A	33013277-33013277-chr1-Synonymous-SNP-G-G-A	0.00646826	AK2
12	BAP1 Non_Silent	0.00229662	BAP1	25743660-25743660-chr2-Missense_Mutation-SNP-T-T-G	0.00481826	ASXL2	8914106-8914106-chr19-Intron-SNP-C-C-G	0.00315126	MUC16	FST UTR	0.0069062	FST	RDM1 Flank	0.0151416	RDM1	90887877-90887877-chr9-Synonymous-SNP-G-G-A	0.00644874	SYK
13	177267479-177267480-chr5-Intron-DEL-AT-AT--	0.00204642	NSD1	STK11 Non_Silent	0.00450242	STK11	177089968-177089969-chr5-Intron-DEL-GT-GT--	0.00304806	FGFR4	108201855-108201855-chr8-3'UTR-DEL-T-T--	0.00675504	EIF3E	190179685-190179685-chr4-3'Flank-SNP-C-C-T	0.0145273	DUX4	133754547-133754547-chr3-Synonymous-SNP-C-C-T	0.00618626	TF
14	CR1 Intron	0.00203911	CR1	TNN Non_Silent	0.00448653	TNN	32975409-32975409-chr7-Intron-SNP-C-C-T	0.00297451	FKBP9	MSN UTR	0.00673274	MSN	155195226-155195226-chr1-5'Flank-SNP-T-T-C	0.0139313	MUC1	49027194-49027194-chr12-Synonymous-SNP-A-A-G	0.00615682	KMT2D
15	8914106-8914106-chr19-Intron-SNP-C-C-G	0.00193714	MUC16	118473470-118473471-chr11-Frame_Shift_Ins-INS-----C	0.00443439	KMT2A	100744808-100744809-chr3-Intron-DEL-TG-TG--	0.00294377	TFG	75538110-75538110-chr7-3'UTR-SNP-A-A-G	0.00665794	HIP1	CYP2C8 Flank	0.0122601	CYP2C8	108663889-108663889-chr6-Synonymous-SNP-C-C-G	0.00608309	FOXO3
16	IDH1 Non_Silent	0.00189936	IDH1	PIK3CA Non_Silent	0.00427494	PIK3CA	136275718-136275719-chr6-Intron-DEL-AC-AC--	0.00275521	BCLAF1	TBL1XR1 UTR	0.00636602	TBL1XR1	PTPN6 Flank	0.0106277	PTPN6	36287193-36287193-chr1-Synonymous-SNP-A-A-C	0.00567933	THRAP3
17	PCM1 Intron	0.00188364	PCM1	GLI1 Non_Silent	0.00389777	GLI1	LRP1B Intron	0.00264677	LRP1B	THRA UTR	0.00625956	THRA	NKX2-1 Flank	0.0105619	NKX2-1	57470756-57470756-chr12-Synonymous-SNP-A-A-G	0.00558727	GLI1
18	GLI1 Non_Silent	0.00187585	GLI1	8936799-8936799-chr19-Missense_Mutation-SNP-C-C-T	0.00387669	MUC16	175146835-175146838-chr1-Intron-DEL-TAAT-TAAT--	0.00260243	TNN	PABPC1 UTR	0.00618634	PABPC1	XPA Flank	0.0104984	XPA	TF Synonymous	0.00557448	TF
19	STK11 Non_Silent	0.00186198	STK11	KRAS Non_Silent	0.00386263	KRAS	EGFR Intron	0.00257636	EGFR	163415144-163415146-chr6-5'UTR-DEL-CGG-CGG--	0.00616436	QKI	190179613-190179613-chr4-3'Flank-SNP-C-C-A	0.00959954	DUX4	SYK Synonymous	0.0054475	SYK
20	LRP1B Non_Silent	0.00180189	LRP1B	28695852-28695852-chr22-Missense_Mutation-SNP-T-T-C	0.00359662	CHEK2	41708668-41708669-chr8-Intron-DEL-AC-AC--	0.00257632	ANK1	79599909-79599914-chr16-5'UTR-DEL-GCCGCC-GCCGCC--	0.00597484	MAF	PIK3CB Flank	0.00949247	PIK3CB	41177264-41177264-chr22-Synonymous-SNP-T-T-C	0.00535768	EP300
21	CTNND2 Non_Silent	0.00175206	CTNND2	33005339-33005339-chr7-Missense_Mutation-SNP-C-C-G	0.00355917	FKBP9	222293706-222293707-chr2-Intron-DEL-CT-CT--	0.00250713	PAX3	TSC2 UTR	0.00571054	TSC2	33010623-33010624-chr1-3'Flank-DEL-AC-AC--	0.00945908	AK2	MECOM Synonymous	0.00505219	MECOM
22	58782452-58782454-chr1-In_Frame_Del-DEL-GCT-GCT--	0.00173792	JUN	CARD11 Non_Silent	0.00354354	CARD11	PCM1 Intron	0.0024825	PCM1	94479275-94479276-chr13-5'UTR-DEL-CT-CT--	0.00570279	DCT	NR4A3 Flank	0.00899341	NR4A3	24758060-24758060-chr2-Synonymous-SNP-T-T-G	0.00501526	NCOA1
23	MALAT1 Flank	0.00171645	MALAT1	RB1 Non_Silent	0.00349639	RB1	FKBP9 Intron	0.00247799	FKBP9	LEF1 UTR	0.00567283	LEF1	RUNX1 Flank	0.00882763	RUNX1	LRP1B Synonymous	0.00469531	LRP1B
24	68686517-68686517-chr10-Synonymous-SNP-A-A-C	0.00165863	TET1	TRIP11 Non_Silent	0.00334837	TRIP11	13988631-13988631-chr7-Intron-SNP-G-G-A	0.00246564	ETV1	ETV5 UTR	0.0054959	ETV5	MLLT4 Flank	0.00876376	MLLT4	195784797-195784797-chr3-Synonymous-SNP-G-G-A	0.00468229	MUC4
25	100744808-100744809-chr3-Intron-DEL-TG-TG--	0.00165544	TFG	138132688-138132688-chr8-Missense_Mutation-SNP-T-T-G	0.00331085	FAM135B	6710574-6710577-chr19-Intron-DEL-GAGA-GAGA--	0.00244856	C3	CXCR4 UTR	0.00549482	CXCR4	NFATC2 Flank	0.00850557	NFATC2	LARP4 Synonymous	0.00457146	LARP4
26	NTRK1 Intron	0.00162944	NTRK1	APOB Non_Silent	0.00329686	APOB	222918044-222918044-chr2-Splice_Site-SNP-A-A-T	0.00240903	ACSL3	IL7R UTR	0.00539459	IL7R	23318581-23318581-chr22-3'Flank-SNP-C-C-T	0.0077327	BCR	NUP98 Synonymous	0.0045531	NUP98
27	MUC4 Synonymous	0.0016192	MUC4	195786332-195786332-chr3-Missense_Mutation-SNP-C-C-T	0.00328641	MUC4	PTK6 Intron	0.00239603	PTK6	CAMTA1 UTR	0.00533363	CAMTA1	33010784-33010784-chr1-3'Flank-SNP-C-C-G	0.00771167	AK2	124340170-124340170-chr12-Synonymous-SNP-A-A-C	0.00452485	NCOR2
28	256477-256477-chr5-3'UTR-SNP-T-T-C	0.00159446	SDHA	TNC Non_Silent	0.00312695	TNC	49417752-49417752-chr3-Intron-SNP-A-A-C	0.00231452	AMT	SS18 UTR	0.00531872	SS18	GATA3 Flank	0.00750837	GATA3	152248130-152248130-chr7-Synonymous-SNP-T-T-C	0.00450519	KMT2C
29	C3 Intron	0.0015838	C3	195785774-195785774-chr3-Missense_Mutation-SNP-G-G-A	0.0030452	MUC4	24768172-24768173-chr2-Intron-INS-----G	0.00230365	NCOA1	CCR7 UTR	0.0053098	CCR7	AK2 Flank	0.00723883	AK2	102416883-102416883-chr10-Synonymous-SNP-A-A-C	0.00447625	PSD
30	72787695-72787697-chr16-In_Frame_Del-DEL-GCC-GCC--	0.00157811	ZFHX3	148147640-148147640-chr7-Missense_Mutation-SNP-C-C-A	0.00303406	CNTNAP2	ERBB4 Intron	0.00228158	ERBB4	ZNRF3 UTR	0.00530303	ZNRF3	TCP1 Flank	0.00712831	TCP1	PARG Synonymous	0.00434946	PARG
31	RGS7 Intron	0.00157355	RGS7	32974751-32974751-chr7-Missense_Mutation-SNP-A-A-G	0.00296729	FKBP9	13816355-13816356-chr1-Intron-INS-----C	0.0022401	PRDM2	NPM1 UTR	0.00529429	NPM1	PPP2R1A Flank	0.00711085	PPP2R1A	157206613-157206613-chr6-Synonymous-SNP-T-T-G	0.00434089	ARID1B
32	EPHA7 Non_Silent	0.00157275	EPHA7	ERBB2 Non_Silent	0.00287607	ERBB2	11234120-11234120-chr1-Intron-SNP-A-A-C	0.00222447	MTOR	MED1 UTR	0.00527381	MED1	ARHGEF1 Flank	0.0069834	ARHGEF1	15937835-15937835-chr1-Synonymous-SNP-C-C-G	0.00422971	SPEN
33	33013299-33013299-chr1-Missense_Mutation-SNP-T-T-A	0.00156751	AK2	27163673-27163673-chr7-Missense_Mutation-SNP-A-A-C	0.00285581	HOXA9	CHEK2 Intron	0.00220988	CHEK2	QKI UTR	0.00527265	QKI	A1CF Flank	0.00694289	A1CF	FAT3 Synonymous	0.0042013	FAT3
34	KDM6A Intron	0.00154584	KDM6A	TFE3 Non_Silent	0.00279806	TFE3	LARP4B Intron	0.00220738	LARP4B	SDHA UTR	0.00524679	SDHA	190179573-190179573-chr4-3'Flank-SNP-T-T-A	0.00693412	DUX4	ERBB3 Synonymous	0.00411428	ERBB3
35	PARG Intron	0.00153653	PARG	25245350-25245350-chr12-Missense_Mutation-SNP-C-C-T	0.00275984	KRAS	58709370-58709370-chr18-Splice_Region-SNP-A-A-T	0.0022007	MALT1	NOTCH2 UTR	0.00524332	NOTCH2	190179652-190179652-chr4-3'Flank-SNP-C-C-T	0.006865	DUX4	CAMTA1 Synonymous	0.00411356	CAMTA1
36	118473470-118473471-chr11-Frame_Shift_Ins-INS-----C	0.00150175	KMT2A	SND1 Non_Silent	0.00275712	SND1	BCLAF1 Intron	0.00217574	BCLAF1	TP53 UTR	0.00519146	TP53	DDX6 Flank	0.00662304	DDX6	50492857-50492857-chr15-Synonymous-SNP-C-C-T	0.00404907	USP8
37	130884103-130884105-chr9-In_Frame_Del-DEL-AAG-AAG--	0.00147812	ABL1	FANCE Non_Silent	0.00275019	FANCE	MED1 Intron	0.00217285	MED1	117627845-117627848-chr1-3'UTR-DEL-TGTG-TGTG--	0.00511341	FAM46C	PCM1 Flank	0.00649417	PCM1	152248016-152248016-chr7-Synonymous-SNP-G-G-C	0.00404525	KMT2C
38	WHSC1L1 Non_Silent	0.00146949	WHSC1L1	TGFBR2 Non_Silent	0.00273171	TGFBR2	36923307-36923308-chr9-Intron-DEL-TC-TC--	0.00215911	PAX5	CANT1 UTR	0.00497816	CANT1	190179609-190179609-chr4-3'Flank-SNP-A-A-G	0.00610754	DUX4	TSC2 Synonymous	0.00397578	TSC2
39	PTPRK Intron	0.00145082	PTPRK	118506082-118506082-chr11-Missense_Mutation-SNP-A-A-C	0.00267937	KMT2A	50188800-50188801-chr17-Splice_Region-DEL-AG-AG--	0.00215079	COL1A1	FUS UTR	0.00492645	FUS	33012985-33012988-chr1-3'Flank-DEL-CACA-CACA--	0.00606575	AK2	EGFR Synonymous	0.00396709	EGFR
40	PIK3CA Non_Silent	0.00143594	PIK3CA	CHEK2 Non_Silent	0.00265528	CHEK2	C6 Intron	0.00214773	C6	FGFR1OP UTR	0.00471557	FGFR1OP	99865302-99865303-chr9-3'Flank-DEL-AT-AT--	0.00586574	NR4A3	ATP2B3 Synonymous	0.0039431	ATP2B3
41	148229750-148229750-chr7-Missense_Mutation-SNP-A-A-C	0.00143187	CNTNAP2	195786343-195786343-chr3-Missense_Mutation-SNP-A-A-G	0.00263563	MUC4	RANBP2 Intron	0.00214771	RANBP2	68226629-68226629-chr5-5'UTR-SNP-C-C-A	0.00467622	PIK3R1	U2 Flank	0.00574298	U2	29220745-29220745-chr2-Synonymous-SNP-T-T-C	0.00393109	ALK
42	KMT2C Non_Silent	0.00140376	KMT2C	LRP1B Non_Silent	0.00261725	LRP1B	TBL1XR1 Intron	0.00213994	TBL1XR1	ZFHX3 UTR	0.00459831	ZFHX3	CSF3R Flank	0.00555284	CSF3R	10049400-10049400-chr3-Synonymous-SNP-T-T-C	0.00390699	FANCD2
43	SMARCE1 Intron	0.00137569	SMARCE1	11110877-11110879-chr5-In_Frame_Del-DEL-TTC-TTC--	0.00261633	CTNND2	MDM4 Intron	0.0021068	MDM4	IST1 UTR	0.00451103	IST1	CRTC1 Flank	0.00552642	CRTC1	MAP2 Synonymous	0.00390489	MAP2
44	42306341-42306341-chr8-Splice_Site-SNP-A-A-T	0.0013575	IKBKB	KAT6B Non_Silent	0.0025834	KAT6B	PTPN6 Intron	0.00209258	PTPN6	ZNF2 UTR	0.00442201	ZNF2	KMT2A Flank	0.0055048	KMT2A	DNAJB1 Synonymous	0.00388988	DNAJB1
45	KMT2A Non_Silent	0.00134006	KMT2A	STAG2 Non_Silent	0.00257772	STAG2	115040907-115040908-chr9-Intron-DEL-AC-AC--	0.00208488	TNC	RSPO3 UTR	0.00430962	RSPO3	18683664-18683666-chr19-5'Flank-DEL-GGA-GGA--	0.00540585	CRTC1	8977467-8977467-chr19-Synonymous-SNP-A-A-G	0.00383905	MUC16
46	SH3GL1 Intron	0.00130222	SH3GL1	53666432-53666432-chr3-Missense_Mutation-SNP-T-T-G	0.00256875	CACNA1D	RET Intron	0.00207285	RET	BCORL1 UTR	0.00422389	BCORL1	190179565-190179565-chr4-3'Flank-SNP-G-G-C	0.00534936	DUX4	MUC16 Synonymous	0.00381107	MUC16
47	6582652-6582652-chr12-Missense_Mutation-SNP-C-C-A	0.00129067	CHD4	CAMTA1 Non_Silent	0.00255983	CAMTA1	211624104-211624105-chr2-Intron-DEL-TC-TC--	0.00206846	ERBB4	3069248-3069248-chr1-5'UTR-SNP-C-C-G	0.00418012	PRDM16	PRPF40B Flank	0.00528355	PRPF40B	169115580-169115580-chr3-Synonymous-SNP-T-T-G	0.00378747	MECOM
48	ELN Intron	0.00127963	ELN	102875613-102875613-chr13-Missense_Mutation-SNP-A-A-C	0.00254154	ERCC5	PTPRC Intron	0.00206026	PTPRC	GNAS UTR	0.00411078	GNAS	CDC7 Flank	0.00523026	CDC7	TCF7 Synonymous	0.00378387	TCF7
49	DDX10 Non_Silent	0.00126675	DDX10	SMAD4 Non_Silent	0.00251931	SMAD4	PBRM1 Intron	0.0020451	PBRM1	33026738-33026739-chr21-5'UTR-DEL-CT-CT--	0.00403825	OLIG2	CHEK2 Flank	0.00517731	CHEK2	RNF43 Synonymous	0.00376433	RNF43
50	195786332-195786332-chr3-Missense_Mutation-SNP-C-C-T	0.00125677	MUC4	100705591-100705591-chr8-Missense_Mutation-SNP-A-A-G	0.00249378	PABPC1	RAD51B Intron	0.00204264	RAD51B	EIF1AX UTR	0.00401782	EIF1AX	CSF1 Flank	0.00516502	CSF1	USP8 Synonymous	0.00364777	USP8
51	32976375-32976375-chr7-Nonsense_Mutation-SNP-T-T-G	0.00125474	FKBP9	148229750-148229750-chr7-Missense_Mutation-SNP-A-A-C	0.00248927	CNTNAP2	CSF3R Intron	0.00203467	CSF3R	FOXL2 UTR	0.00395187	FOXL2	190179578-190179578-chr4-3'Flank-SNP-A-A-G	0.00506324	DUX4	NIN Synonymous	0.0036306	NIN
52	113247001-113247002-chr2-Intron-DEL-GT-GT--	0.00125175	PAX8	ROBO2 Non_Silent	0.00247586	ROBO2	256259-256259-chr5-Intron-SNP-T-T-A	0.00202009	SDHA	EGFR UTR	0.00395005	EGFR	S100A7 Flank	0.00494489	S100A7	26766305-26766305-chr1-Synonymous-SNP-C-C-G	0.00361949	ARID1A
53	NRG1 Intron	0.00124882	NRG1	TET2 Non_Silent	0.00246684	TET2	44248808-44248809-chr6-Intron-DEL-TT-TT--	0.00197026	HSP90AB1	243843242-243843244-chr1-5'UTR-DEL-CTG-CTG--	0.00393204	AKT3	FGFR2 Flank	0.0049052	FGFR2	31258415-31258415-chr17-Synonymous-SNP-T-T-C	0.00359627	NF1
54	18683664-18683666-chr19-5'Flank-DEL-GGA-GGA--	0.00124867	CRTC1	KMT2A Non_Silent	0.00246058	KMT2A	TAL1 Intron	0.0019554	TAL1	53486108-53486108-chr5-3'UTR-SNP-G-G-A	0.00388244	FST	CD209 Flank	0.00490074	CD209	45850943-45850943-chr12-Synonymous-SNP-A-A-C	0.00356251	ARID2
55	KRAS Non_Silent	0.00124166	KRAS	APC Non_Silent	0.00245443	APC	118900576-118900579-chr11-Intron-DEL-GCCT-GCCT--	0.00194871	BCL9L	26475271-26475271-chr1-3'UTR-SNP-G-G-T	0.00388022	HMGN2	65501009-65501009-chr11-3'Flank-DEL-T-T--	0.00488414	MALAT1	FAT4 Synonymous	0.00354487	FAT4
56	SBDS Intron	0.00123397	SBDS	8885782-8885782-chr19-Missense_Mutation-SNP-G-G-C	0.00239442	MUC16	41688007-41688007-chr8-Intron-SNP-G-G-T	0.00193083	ANK1	FANCA UTR	0.00384194	FANCA	BCL11A Flank	0.00487747	BCL11A	8951069-8951069-chr19-Synonymous-SNP-T-T-G	0.0035423	MUC16
57	ASXL2 Non_Silent	0.00123257	ASXL2	CSMD3 Non_Silent	0.002388	CSMD3	IDH2 Intron	0.00189952	IDH2	JUN UTR	0.00383826	JUN	KLK2 Flank	0.00483422	KLK2	NOTCH1 Synonymous	0.00350319	NOTCH1
58	32975409-32975409-chr7-Intron-SNP-C-C-T	0.00122869	FKBP9	SPEN Non_Silent	0.00237734	SPEN	128694107-128694108-chr9-Intron-DEL-TA-TA--	0.00189941	SET	HIC2 UTR	0.00381515	HIC2	PER1 Flank	0.00479869	PER1	TAF15 Synonymous	0.00347778	TAF15
59	177089968-177089969-chr5-Intron-DEL-GT-GT--	0.00122577	FGFR4	50186682-50186682-chr17-Missense_Mutation-SNP-T-T-G	0.00236058	COL1A1	27688993-27688994-chr12-Intron-DEL-TT-TT--	0.00189834	PPFIBP1	9716285-9716285-chrX-3'UTR-SNP-A-A-C	0.00380985	TBL1X	ZNRF3 Flank	0.00472802	ZNRF3	70156043-70156043-chr8-Synonymous-SNP-A-A-G	0.00347677	NCOA2
60	PTPRT Intron	0.00121988	PTPRT	176107582-176107584-chr2-In_Frame_Del-DEL-GCG-GCG--	0.00235226	HOXD11	C7 Intron	0.00188118	C7	FAM46C UTR	0.0037803	FAM46C	USP6 Flank	0.00463817	USP6	128911735-128911735-chr11-Synonymous-SNP-C-C-T	0.00345492	KCNJ5
61	138132688-138132688-chr8-Missense_Mutation-SNP-T-T-G	0.00121314	FAM135B	ELF3 Non_Silent	0.00234874	ELF3	CD209 Intron	0.00187863	CD209	58974631-58974632-chr5-3'UTR-DEL-AA-AA--	0.00375544	PDE4D	STK11 Flank	0.00458466	STK11	32332846-32332846-chr13-Synonymous-SNP-G-G-A	0.00341908	BRCA2
62	SETD2 Non_Silent	0.00120429	SETD2	ANK1 Non_Silent	0.00234541	ANK1	MYO5A Intron	0.00186037	MYO5A	TSC1 UTR	0.00375211	TSC1	33010795-33010795-chr1-3'Flank-SNP-G-G-A	0.00453919	AK2	6581704-6581704-chr12-Synonymous-SNP-T-T-G	0.00340841	CHD4
63	28695852-28695852-chr22-Missense_Mutation-SNP-T-T-C	0.00119578	CHEK2	58782987-58782987-chr1-Nonsense_Mutation-SNP-G-G-T	0.00233893	JUN	31361198-31361198-chr10-Intron-SNP-T-T-C	0.00185765	ZEB1	CD7 UTR	0.00362551	CD7	ZBTB16 Flank	0.00452682	ZBTB16	POLE Synonymous	0.00337117	POLE
64	29943718-29943718-chr6-Intron-SNP-G-G-A	0.00119174	HLA-A	3770628-3770628-chr16-Missense_Mutation-SNP-G-G-T	0.00233289	CREBBP	MB21D2 Intron	0.00184895	MB21D2	130005230-130005230-chrX-5'UTR-SNP-T-T-G	0.00360824	BCORL1	NIN Flank	0.00433483	NIN	108751415-108751415-chr2-Synonymous-SNP-A-A-G	0.00336373	RANBP2
65	BRAF Non_Silent	0.00119172	BRAF	EPHA7 Non_Silent	0.00232325	EPHA7	PDE4DIP Intron	0.00183898	PDE4DIP	CHST11 UTR	0.00359383	CHST11	190179746-190179746-chr4-3'Flank-SNP-C-C-A	0.00428746	DUX4	68686517-68686517-chr10-Synonymous-SNP-A-A-C	0.00333425	TET1
66	33010638-33010638-chr1-3'Flank-SNP-T-T-C	0.00118791	AK2	FAT4 Non_Silent	0.00231595	FAT4	APOB Intron	0.00183143	APOB	35856954-35856955-chr5-5'UTR-DEL-CT-CT--	0.00355118	IL7R	FOXR1 Flank	0.00423941	FOXR1	58358072-58358072-chr17-Synonymous-SNP-C-C-T	0.00329752	RNF43
67	RGPD3 Non_Silent	0.0011859	RGPD3	29049831-29049833-chr22-In_Frame_Del-DEL-CAG-CAG--	0.0023104	ZNRF3	240800553-240800554-chr1-Intron-DEL-AC-AC--	0.00183079	RGS7	ACVR1 UTR	0.00354151	ACVR1	DCAF12L2 Flank	0.00418374	DCAF12L2	CLIP1 Synonymous	0.00328559	CLIP1
68	60918385-60918385-chr2-Intron-SNP-A-A-T	0.00118535	REL	75022148-75022153-chr10-In_Frame_Del-DEL-GAAGAA-GAAGAA--	0.00230045	KAT6B	13100588-13100588-chr19-Intron-SNP-G-G-A	0.00181852	LYL1	FOXA1 UTR	0.00351986	FOXA1	MECOM Flank	0.00409811	MECOM	TERT Synonymous	0.00326193	TERT
69	FAT3 Intron	0.00118372	FAT3	BIRC6 Non_Silent	0.00229838	BIRC6	70216766-70216766-chr8-Splice_Site-SNP-T-T-A	0.0018116	NCOA2	27181706-27181707-chr7-3'UTR-DEL-AT-AT--	0.00348907	HOXA11	RHOH Flank	0.00395834	RHOH	ATRX Synonymous	0.00325312	ATRX
70	5130511-5130511-chr17-Intron-SNP-A-A-C	0.00118124	USP6	KDM5A Non_Silent	0.00228919	KDM5A	CRTC3 Intron	0.00180863	CRTC3	FCRL4 UTR	0.00348754	FCRL4	HIST1H3B Flank	0.00393256	HIST1H3B	64192843-64192843-chrX-Synonymous-SNP-A-A-C	0.00323877	AMER1
71	COL3A1 Intron	0.00117961	COL3A1	WHSC1L1 Non_Silent	0.00228882	WHSC1L1	C5 Intron	0.00179723	C5	PHOX2B UTR	0.0034156	PHOX2B	190179616-190179616-chr4-3'Flank-SNP-C-C-A	0.00388107	DUX4	TET1 Synonymous	0.00321811	TET1
72	COL1A1 Intron	0.00117687	COL1A1	NFE2L2 Non_Silent	0.00228847	NFE2L2	MLH1 Intron	0.00179584	MLH1	SRGAP3 UTR	0.00339185	SRGAP3	CD28 Flank	0.0038758	CD28	MED1 Synonymous	0.00320321	MED1
73	IL21R Non_Silent	0.0011746	IL21R	7674220-7674220-chr17-Missense_Mutation-SNP-C-C-T	0.00227804	TP53	RGS7 Intron	0.00179562	RGS7	BCR UTR	0.00332573	BCR	PBRM1 Flank	0.00387381	PBRM1	NSD1 Synonymous	0.00315763	NSD1
74	CARD11 Non_Silent	0.00116422	CARD11	106457033-106457033-chr2-Missense_Mutation-SNP-C-C-T	0.00226851	RGPD3	9052989-9052989-chr3-Intron-SNP-G-G-T	0.00179512	SRGAP3	HLF UTR	0.00331079	HLF	190179617-190179617-chr4-3'Flank-SNP-T-T-A	0.00380178	DUX4	27095700-27095700-chr7-Synonymous-SNP-G-G-A	0.00310492	HOXA1
75	RGPD3 Intron	0.00115854	RGPD3	33013287-33013287-chr1-Missense_Mutation-SNP-C-C-T	0.00225451	AK2	AMT Intron	0.00178788	AMT	127196075-127196075-chr6-3'UTR-SNP-C-C-T	0.00330272	RSPO3	F7 Flank	0.00380131	F7	NCOA1 Synonymous	0.00308427	NCOA1
76	DDR2 Non_Silent	0.00115441	DDR2	RGPD3 Non_Silent	0.00224201	RGPD3	70216648-70216648-chr8-Intron-SNP-C-C-A	0.00177874	NCOA2	VTI1A UTR	0.00329907	VTI1A	33010837-33010839-chr1-3'Flank-DEL-AAA-AAA--	0.0037663	AK2	BUB1 Synonymous	0.00303658	BUB1
77	FAM135B Non_Silent	0.00114953	FAM135B	NOTCH1 Non_Silent	0.00223785	NOTCH1	KMT2C Intron	0.00177466	KMT2C	82315253-82315253-chr17-3'UTR-SNP-T-T-G	0.00327373	CD7	190179704-190179704-chr4-3'Flank-SNP-T-T-C	0.00373784	DUX4	TP63 Synonymous	0.00303396	TP63
78	FGFR1 Intron	0.00114648	FGFR1	HOXA9 Non_Silent	0.00223332	HOXA9	MUC4 Intron	0.00176958	MUC4	HOXA13 UTR	0.00322397	HOXA13	3069057-3069059-chr1-5'Flank-DEL-GGC-GGC--	0.00349219	PRDM16	CDH11 Synonymous	0.00302388	CDH11
79	41711185-41711187-chr15-In_Frame_Del-DEL-CAG-CAG--	0.00114024	MGA	ZNF521 Non_Silent	0.00222123	ZNF521	MTA1 Intron	0.00176416	MTA1	29945548-29945548-chr6-3'UTR-SNP-C-C-T	0.00322012	HLA-A	SGK1 Flank	0.00339729	SGK1	FGFR3 Synonymous	0.00297716	FGFR3
80	158787210-158787211-chr6-Splice_Region-DEL-GA-GA--	0.00113883	EZR	122328146-122328146-chr12-Missense_Mutation-SNP-G-G-T	0.00220607	CLIP1	40293946-40293946-chr17-Splice_Region-SNP-A-A-T	0.00176284	CDC6	ZNF429 UTR	0.00321289	ZNF429	SYK Flank	0.00321714	SYK	AFF3 Synonymous	0.00293713	AFF3
81	28695853-28695853-chr22-Synonymous-SNP-G-G-A	0.001135	CHEK2	SLC34A2 Non_Silent	0.00220588	SLC34A2	PTPRT Intron	0.00175428	PTPRT	75538074-75538074-chr7-3'UTR-SNP-C-C-G	0.00317948	HIP1	NTRK1 Flank	0.00317338	NTRK1	DNM2 Synonymous	0.00291619	DNM2
82	FHIT Intron	0.0011301	FHIT	DCAF12L2 Non_Silent	0.00220531	DCAF12L2	189880233-189880234-chr3-Intron-DEL-GT-GT--	0.00175285	TP63	50476076-50476077-chr12-3'UTR-DEL-AT-AT--	0.00312724	LARP4	PRRX1 Flank	0.00315682	PRRX1	AK2 Synonymous	0.00290738	AK2
83	100705009-100705009-chr8-Missense_Mutation-SNP-C-C-T	0.0011294	PABPC1	71141248-71141250-chrX-In_Frame_Del-DEL-CAG-CAG--	0.0021986	MED12	15605924-15605925-chr2-Intron-DEL-TC-TC--	0.00173441	DDX1	BCL11B UTR	0.00309294	BCL11B	CLIP1 Flank	0.00315127	CLIP1	PTCH1 Synonymous	0.00290204	PTCH1
84	APOB Non_Silent	0.00112774	APOB	30650380-30650380-chr3-Frame_Shift_Del-DEL-A-A--	0.00217525	TGFBR2	DDX10 Intron	0.00173046	DDX10	BCL11A UTR	0.00307195	BCL11A	FBL Flank	0.00315127	FBL	USP6 Synonymous	0.00285443	USP6
85	99175207-99175209-chr14-In_Frame_Del-DEL-CTC-CTC--	0.00112216	BCL11B	77922179-77922179-chr9-Nonsense_Mutation-SNP-G-G-T	0.00217149	GNAQ	161673277-161673277-chr1-Intron-SNP-C-C-T	0.00172556	FCGR2B	AFF4 UTR	0.00306551	AFF4	MED1 Flank	0.00315127	MED1	FAT1 Synonymous	0.00284203	FAT1
86	KMT2D Non_Silent	0.00111909	KMT2D	KIAA1549 Non_Silent	0.00216198	KIAA1549	RB1 Intron	0.00172134	RB1	AFF3 UTR	0.00303537	AFF3	106470842-106470842-chr2-5'Flank-SNP-C-C-T	0.00314381	RGPD3	MGA Synonymous	0.00282693	MGA
87	TP53 Intron	0.00111778	TP53	72788135-72788137-chr16-In_Frame_Del-DEL-GCT-GCT--	0.00215004	ZFHX3	SH2B3 Intron	0.00171935	SH2B3	PRDM1 UTR	0.00302227	PRDM1	ATIC Flank	0.00312877	ATIC	AKAP9 Synonymous	0.00281374	AKAP9
88	CACNA1D Intron	0.00111777	CACNA1D	33013299-33013299-chr1-Missense_Mutation-SNP-T-T-A	0.0021424	AK2	NCOA1 Intron	0.00170409	NCOA1	EZR UTR	0.00302038	EZR	50400872-50400872-chr12-5'Flank-SNP-A-A-G	0.00312132	LARP4	GRIN2A Synonymous	0.00280028	GRIN2A
89	MTOR Intron	0.00111554	MTOR	CTNNB1 Non_Silent	0.00213075	CTNNB1	PRDM1 Intron	0.00170156	PRDM1	153336117-153336118-chr4-3'UTR-DEL-TA-TA--	0.00299486	TRIM2	DCTN1 Flank	0.00305703	DCTN1	PRDM16 Synonymous	0.00279541	PRDM16
90	70216766-70216766-chr8-Splice_Site-SNP-T-T-A	0.0011153	NCOA2	26780673-26780673-chr1-Missense_Mutation-SNP-T-T-G	0.0021061	ARID1A	DCTN1 Intron	0.00169721	DCTN1	ASPSCR1 UTR	0.00297165	ASPSCR1	AK1 Flank	0.00305703	AK1	49932145-49932145-chr10-Synonymous-SNP-C-C-G	0.00278672	PARG
91	8936799-8936799-chr19-Missense_Mutation-SNP-C-C-T	0.00111146	MUC16	100715486-100715486-chr8-Missense_Mutation-SNP-G-G-A	0.00210015	PABPC1	RCC2 Intron	0.00168868	RCC2	FGFR3 UTR	0.00294913	FGFR3	KRAS Flank	0.00305703	KRAS	PDE4DIP Synonymous	0.00277128	PDE4DIP
92	SND1 Intron	0.00111119	SND1	TRRAP Non_Silent	0.00209322	TRRAP	50850593-50850594-chr10-Intron-DEL-TG-TG--	0.0016879	A1CF	63128464-63128465-chr18-3'UTR-DEL-TG-TG--	0.00292923	BCL2	C3 Flank	0.00305453	C3	152265184-152265184-chr7-Synonymous-SNP-C-C-T	0.00276048	KMT2C
93	ARID1B Non_Silent	0.00110768	ARID1B	152265205-152265205-chr7-Missense_Mutation-SNP-C-C-G	0.00209234	KMT2C	USP6 Intron	0.00167842	USP6	CTNNA2 UTR	0.00289559	CTNNA2	MLF1 Flank	0.00302968	MLF1	3731513-3731513-chr11-Synonymous-SNP-T-T-G	0.00274126	NUP98
94	204537417-204537417-chr1-Intron-SNP-A-A-T	0.00110739	MDM4	152273774-152273774-chr7-Missense_Mutation-SNP-C-C-T	0.00208461	KMT2C	COL3A1 Intron	0.0016763	COL3A1	MAPK1 UTR	0.00289033	MAPK1	H3F3B Flank	0.00301054	H3F3B	UBR5 Synonymous	0.00273988	UBR5
95	50186682-50186682-chr17-Missense_Mutation-SNP-T-T-G	0.00110329	COL1A1	89333597-89333599-chr15-In_Frame_Del-DEL-TGC-TGC--	0.00206904	POLG	MPL Intron	0.00166651	MPL	TK1 UTR	0.00283782	TK1	HLA-A Flank	0.00297818	HLA-A	CBFA2T3 Synonymous	0.00270212	CBFA2T3
96	RNF213 Intron	0.00110167	RNF213	TP63 Non_Silent	0.00206094	TP63	1260401-1260402-chr5-Intron-DEL-CA-CA--	0.00166039	TERT	RNF2 UTR	0.0028188	RNF2	SP1 Flank	0.00297212	SP1	WHSC1L1 Synonymous	0.00265803	WHSC1L1
97	CSF3R Intron	0.00109611	CSF3R	HOXD11 Non_Silent	0.00205779	HOXD11	41227186-41227187-chr3-Intron-DEL-AT-AT--	0.00165789	CTNNB1	TPR UTR	0.00279965	TPR	CNBD1 Flank	0.00293502	CNBD1	JAK3 Synonymous	0.0026471	JAK3
98	DUX4 Flank	0.00109533	DUX4	100715488-100715488-chr8-Missense_Mutation-SNP-C-C-T	0.00203965	PABPC1	JAZF1 Intron	0.00164613	JAZF1	TRIM2 UTR	0.00279167	TRIM2	ZBTB1 Flank	0.00288138	ZBTB1	PAX3 Synonymous	0.00264277	PAX3
99	42291675-42291675-chr19-Missense_Mutation-SNP-G-G-C	0.00109419	CIC	BCL6 Non_Silent	0.00203896	BCL6	TRIP11 Intron	0.00164378	TRIP11	MUC16 UTR	0.00277943	MUC16	118751068-118751069-chr11-3'Flank-DEL-TA-TA--	0.00285154	DDX6	THRAP3 Synonymous	0.00263836	THRAP3
100	33013271-33013271-chr1-Synonymous-SNP-G-G-A	0.00109179	AK2	PCM1 Non_Silent	0.00203844	PCM1	74041290-74041290-chr7-Intron-SNP-A-A-C	0.0016436	ELN	CHIC2 UTR	0.0027749	CHIC2	SRC Flank	0.00284255	SRC	8956346-8956346-chr19-Synonymous-SNP-T-T-G	0.00263031	MUC16
101	KAT6A Non_Silent	0.00108832	KAT6A	TET1 Non_Silent	0.00203496	TET1	PICALM Intron	0.00163744	PICALM	BCL9L UTR	0.0027362	BCL9L	ARC Flank	0.00277125	ARC	8960747-8960747-chr19-Synonymous-SNP-T-T-G	0.0026096	MUC16
102	ARID1A Intron	0.00108795	ARID1A	MGA Non_Silent	0.00199751	MGA	SUZ12 Intron	0.00163522	SUZ12	ROS1 UTR	0.00269097	ROS1	HSP90AB1 Flank	0.00273763	HSP90AB1	48523873-48523873-chrX-Synonymous-SNP-C-C-G	0.00260054	EBP
103	HSP90AA1 Non_Silent	0.00108619	HSP90AA1	FBXO11 Non_Silent	0.00198638	FBXO11	COL2A1 Intron	0.00163324	COL2A1	PIK3R1 UTR	0.00269033	PIK3R1	207052260-207052260-chr1-5'Flank-DEL-T-T--	0.00267255	YOD1	APC Synonymous	0.00260024	APC
104	118903196-118903197-chr11-Intron-DEL-AG-AG--	0.00108541	BCL9L	57178458-57178459-chr12-Frame_Shift_Ins-INS-----G	0.00198308	LRP1	TNN Intron	0.00163271	TNN	CSF1R UTR	0.00267012	CSF1R	TAF1 Flank	0.00266253	TAF1	APOBEC3B Synonymous	0.00258679	APOBEC3B
105	KMT2A Intron	0.00108356	KMT2A	ARID1B Non_Silent	0.0019655	ARID1B	209696505-209696507-chr2-Intron-DEL-TGT-TGT--	0.0016314	MAP2	TGFBR2 UTR	0.00266472	TGFBR2	SFRP4 Flank	0.00265365	SFRP4	CREBBP Synonymous	0.00257867	CREBBP
106	BCL9 Intron	0.00108232	BCL9	KDM6A Non_Silent	0.00195018	KDM6A	17413487-17413487-chr1-Intron-SNP-C-C-A	0.00163123	RCC2	PRDM16 UTR	0.00263634	PRDM16	CDKN2A Flank	0.00262992	CDKN2A	NFATC2 Synonymous	0.00256929	NFATC2
107	FKBP9 Non_Silent	0.00107877	FKBP9	WRN Non_Silent	0.00194196	WRN	63532451-63532451-chr20-Intron-DEL-G-G--	0.00162072	PTK6	132880996-132880996-chr5-3'UTR-SNP-T-T-G	0.00262054	AFF4	MYCN Flank	0.00262631	MYCN	TNN Synonymous	0.00256305	TNN
108	ERG Intron	0.00107807	ERG	DDX10 Non_Silent	0.00194191	DDX10	JAK1 Intron	0.00161885	JAK1	SMAD4 UTR	0.00258331	SMAD4	190179642-190179642-chr4-3'Flank-SNP-A-A-C	0.00260421	DUX4	ERC1 Synonymous	0.00254453	ERC1
109	PC Non_Silent	0.00107677	PC	RET Non_Silent	0.00192713	RET	42306341-42306341-chr8-Splice_Site-SNP-A-A-T	0.00161881	IKBKB	POU2AF1 UTR	0.00257022	POU2AF1	190179688-190179688-chr4-3'Flank-SNP-G-G-A	0.00253002	DUX4	KDM5A Synonymous	0.00253365	KDM5A
110	PAX5 Intron	0.00107611	PAX5	DNMT3A Non_Silent	0.00191162	DNMT3A	HSP90AB1 Intron	0.00160872	HSP90AB1	KLF6 UTR	0.00256985	KLF6	BCR Flank	0.00251315	BCR	DCAF12 Synonymous	0.00252684	DCAF12
111	PABPC1 Intron	0.00107558	PABPC1	RSF1 Non_Silent	0.00191096	RSF1	KIAA1598 Intron	0.0016087	KIAA1598	ZCCHC8 UTR	0.00255551	ZCCHC8	9763013-9763015-chr16-3'Flank-DEL-CAA-CAA--	0.00245483	GRIN2A	ZNRF3 Synonymous	0.00252658	ZNRF3
112	49417752-49417752-chr3-Intron-SNP-A-A-C	0.00107173	AMT	27437573-27437573-chr16-Missense_Mutation-SNP-A-A-C	0.00190947	IL21R	SSX1 Intron	0.00160744	SSX1	SIRPA UTR	0.00255059	SIRPA	113279023-113279023-chr2-5'Flank-SNP-T-T-G	0.00241115	PAX8	WAS Synonymous	0.00250283	WAS
113	APOB Intron	0.00107001	APOB	50186693-50186693-chr17-Missense_Mutation-SNP-T-T-G	0.00190236	COL1A1	CTNND2 Intron	0.00160234	CTNND2	SEPT9 UTR	0.00254937	SEPT9	ID1 Flank	0.00236713	ID1	185437496-185437496-chr3-Synonymous-SNP-T-T-G	0.00249549	MAP3K13
114	JUN Non_Silent	0.00106922	JUN	6602041-6602043-chr12-In_Frame_Del-DEL-CTT-CTT--	0.0019006	CHD4	KMT2A Intron	0.00159173	KMT2A	PLAG1 UTR	0.00254592	PLAG1	PAX8 Flank	0.00235238	PAX8	112265565-112265565-chr8-Synonymous-SNP-T-T-G	0.00249502	CSMD3
115	RAD51B Intron	0.00106901	RAD51B	FAM135B Non_Silent	0.00190022	FAM135B	177267479-177267480-chr5-Intron-DEL-AT-AT--	0.00158881	NSD1	MAF UTR	0.00252642	MAF	DAXX Flank	0.00234178	DAXX	CR1 Synonymous	0.00247844	CR1
116	72788665-72788667-chr16-In_Frame_Del-DEL-TGC-TGC--	0.00106725	ZFHX3	IL21R Non_Silent	0.00187868	IL21R	97682448-97682448-chr9-Intron-SNP-G-G-A	0.00158601	XPA	BCLAF1 UTR	0.0025241	BCLAF1	ACSL6 Flank	0.00227287	ACSL6	PICALM Synonymous	0.00247536	PICALM
117	LMNA Intron	0.00106679	LMNA	29193307-29193307-chr2-Missense_Mutation-SNP-C-C-T	0.00186567	ALK	LPP Intron	0.00158597	LPP	29942497-29942497-chr6-5'UTR-SNP-G-G-C	0.00250934	HLA-A	FLCN Flank	0.00219363	FLCN	NUMA1 Synonymous	0.00246985	NUMA1
118	100712676-100712676-chr8-Synonymous-SNP-T-T-C	0.00105972	PABPC1	100705009-100705009-chr8-Missense_Mutation-SNP-C-C-T	0.00183794	PABPC1	BTK Intron	0.00157817	BTK	21447782-21447783-chr22-3'UTR-DEL-GT-GT--	0.00247931	HIC2	29061877-29061877-chr22-3'Flank-DEL-T-T--	0.00218414	ZNRF3	HIST1H3B Synonymous	0.00246575	HIST1H3B
119	PABPC1 Synonymous	0.00105963	PABPC1	81143379-81143379-chr14-Missense_Mutation-SNP-A-A-C	0.00183607	TSHR	TG Intron	0.00157254	TG	BRCA2 UTR	0.00246586	BRCA2	33010803-33010803-chr1-3'Flank-SNP-T-T-G	0.00212798	AK2	132897169-132897169-chr5-Synonymous-SNP-T-T-G	0.00246177	AFF4
120	ATR Intron	0.00105842	ATR	JUN Non_Silent	0.00183542	JUN	77956752-77956753-chr1-Intron-DEL-CA-CA--	0.00155073	FUBP1	100702966-100702966-chr8-3'UTR-SNP-G-G-A	0.00245703	PABPC1	ELF3 Flank	0.00202895	ELF3	KDM6A Synonymous	0.00245551	KDM6A
121	ERBB2 Non_Silent	0.00105577	ERBB2	130884103-130884105-chr9-In_Frame_Del-DEL-AAG-AAG--	0.00181506	ABL1	CDC73 Intron	0.00154831	CDC73	PDGFB UTR	0.00243926	PDGFB	33010691-33010691-chr1-3'Flank-SNP-A-A-G	0.00200555	AK2	NAB2 Synonymous	0.00245181	NAB2
122	RET Non_Silent	0.00105117	RET	FLNA Non_Silent	0.00181392	FLNA	MYB Intron	0.00154598	MYB	48228635-48228635-chr4-5'UTR-SNP-T-T-C	0.00243587	TEC	CRTC3 Flank	0.0019918	CRTC3	100715568-100715568-chr8-Synonymous-SNP-T-T-C	0.00244055	PABPC1
123	TET1 Synonymous	0.00104336	TET1	MUC16 Non_Silent	0.00181187	MUC16	STK11 Intron	0.00154522	STK11	89738596-89738596-chr16-3'UTR-SNP-T-T-G	0.00239221	FANCA	LZTR1 Flank	0.00194183	LZTR1	158767435-158767435-chr6-Synonymous-SNP-T-T-G	0.00243516	EZR
124	29049831-29049833-chr22-In_Frame_Del-DEL-CAG-CAG--	0.00103215	ZNRF3	8886843-8886843-chr19-Missense_Mutation-SNP-C-C-T	0.00180999	MUC16	204537417-204537417-chr1-Intron-SNP-A-A-T	0.00154474	MDM4	EIF3E UTR	0.00237116	EIF3E	CHST11 Flank	0.0018979	CHST11	MEN1 Synonymous	0.0024075	MEN1
125	CNTNAP2 Intron	0.00102707	CNTNAP2	AXIN2 Non_Silent	0.00180669	AXIN2	STAG2 Intron	0.00153651	STAG2	CYP2C8 UTR	0.00234619	CYP2C8	POLQ Flank	0.00188468	POLQ	CDH17 Synonymous	0.00239956	CDH17
126	33013253-33013253-chr1-Synonymous-SNP-G-G-A	0.00101759	AK2	13778642-13778644-chr1-In_Frame_Del-DEL-GAT-GAT--	0.00180393	PRDM2	ARID2 Intron	0.0015364	ARID2	STAT5B UTR	0.00234197	STAT5B	167976167-167976167-chr6-3'Flank-SNP-C-C-G	0.00184613	MLLT4	APOB Synonymous	0.00239945	APOB
127	2924307-2924309-chr7-In_Frame_Del-DEL-GGA-GGA--	0.0010172	CARD11	AK2 Non_Silent	0.00180045	AK2	CRLF2 Intron	0.00152713	CRLF2	100702952-100702952-chr8-3'UTR-SNP-A-A-G	0.00232504	PABPC1	10731462-10731462-chr22-3'Flank-SNP-C-C-T	0.00181701	U2	TNC Synonymous	0.00239536	TNC
128	6679370-6679370-chr19-Intron-SNP-G-G-T	0.00101554	C3	NF1 Non_Silent	0.00179593	NF1	148979731-148979731-chr1-Splice_Region-SNP-A-A-T	0.00151852	PDE4DIP	153270364-153270364-chr4-5'UTR-SNP-C-C-A	0.0022705	TRIM2	MPL Flank	0.00181013	MPL	8886778-8886778-chr19-Synonymous-SNP-G-G-A	0.00238049	MUC16
129	TRIM33 Intron	0.0010146	TRIM33	NF2 Non_Silent	0.00179205	NF2	EWSR1 Intron	0.00151707	EWSR1	SMO UTR	0.00226844	SMO	CSMD3 Flank	0.0017282	CSMD3	10049469-10049469-chr3-Synonymous-SNP-C-C-T	0.00235732	FANCD2
130	POLG Non_Silent	0.0010075	POLG	CNTNAP2 Non_Silent	0.00179103	CNTNAP2	TET2 Intron	0.0015105	TET2	YWHAE UTR	0.00225518	YWHAE	LAT Flank	0.00171632	LAT	134050431-134050431-chr9-Synonymous-SNP-T-T-G	0.00235354	BRD3
131	13988631-13988631-chr7-Intron-SNP-G-G-A	0.00100324	ETV1	92883322-92883322-chr11-Missense_Mutation-SNP-T-T-C	0.00178827	FAT3	IKZF1 Intron	0.00150564	IKZF1	MYCN UTR	0.00225026	MYCN	ALK Flank	0.00171632	ALK	125316540-125316540-chr4-Synonymous-SNP-C-C-G	0.0023435	FAT4
132	GRIN2A Intron	0.00100049	GRIN2A	PIK3CB Non_Silent	0.00177758	PIK3CB	CIC Intron	0.00149852	CIC	1807384-1807385-chr4-3'UTR-DEL-TG-TG--	0.00223847	FGFR3	FGFR1OP Flank	0.00171632	FGFR1OP	KMT2C Synonymous	0.00233625	KMT2C
133	ATRX Intron	0.000992502	ATRX	ATP2B3 Non_Silent	0.00177456	ATP2B3	SPOP Intron	0.00149824	SPOP	P2RY8 UTR	0.00223622	P2RY8	10731221-10731221-chr22-3'Flank-SNP-C-C-T	0.00171632	U2	TH Synonymous	0.00231734	TH
134	TERT Flank	0.000990907	TERT	CSF3R Non_Silent	0.00176416	CSF3R	BUB1B Intron	0.00149754	BUB1B	SET UTR	0.0022302	SET	DRG1 Flank	0.00171632	DRG1	77477463-77477463-chr3-Synonymous-SNP-T-T-G	0.00231729	ROBO2
135	TNN Non_Silent	0.000989516	TNN	41711185-41711187-chr15-In_Frame_Del-DEL-CAG-CAG--	0.00176223	MGA	MLLT4 Intron	0.00148853	MLLT4	RIN2 UTR	0.00222949	RIN2	190179606-190179606-chr4-3'Flank-SNP-G-G-C	0.00171632	DUX4	NUTM2B Synonymous	0.0023139	NUTM2B
136	AXIN2 Intron	0.000983706	AXIN2	99601549-99601551-chr2-In_Frame_Del-DEL-GCT-GCT--	0.00175881	AFF3	GLI1 Intron	0.00147732	GLI1	JAK3 UTR	0.00222184	JAK3	60452697-60452697-chr2-3'Flank-DEL-A-A--	0.00171632	BCL11A	JAK1 Synonymous	0.00228816	JAK1
137	RANBP2 Non_Silent	0.000983092	RANBP2	MAML2 Non_Silent	0.00175269	MAML2	COL1A1 Intron	0.00147683	COL1A1	APC UTR	0.00221724	APC	EXT1 Flank	0.00171632	EXT1	KCNJ5 Synonymous	0.00227217	KCNJ5
138	HOXA11 UTR	0.000978801	HOXA11	31087861-31087863-chr8-In_Frame_Del-DEL-AAG-AAG--	0.00174958	WRN	56718447-56718447-chr12-Intron-SNP-A-A-G	0.001474	NACA	ELN UTR	0.00221648	ELN	RPL10 Flank	0.0016564	RPL10	CTNND2 Synonymous	0.00226407	CTNND2
139	7747454-7747454-chr19-Intron-SNP-A-A-C	0.000974672	CD209	8900802-8900802-chr19-Missense_Mutation-SNP-C-C-G	0.00174824	MUC16	BCR Intron	0.00147207	BCR	VHL UTR	0.00221162	VHL	65501214-65501214-chr11-3'Flank-SNP-A-A-G	0.00164171	MALAT1	KAT6B Synonymous	0.00226373	KAT6B
140	222918044-222918044-chr2-Splice_Site-SNP-A-A-T	0.000973733	ACSL3	42291675-42291675-chr19-Missense_Mutation-SNP-G-G-C	0.0017464	CIC	148828714-148828714-chr7-Intron-SNP-C-C-A	0.00146508	EZH2	AXIN2 UTR	0.0022011	AXIN2	ERCC4 Flank	0.00163911	ERCC4	108733267-108733267-chrX-Synonymous-SNP-T-T-G	0.00225747	IRS4
141	AIP Intron	0.000973053	AIP	25676526-25676528-chr4-In_Frame_Del-DEL-GCT-GCT--	0.00173951	SLC34A2	PTPN1 Intron	0.00146279	PTPN1	FEN1 UTR	0.00219786	FEN1	75784539-75784539-chr17-5'Flank-SNP-C-C-A	0.00162208	H3F3B	AMER1 Synonymous	0.002257	AMER1
142	NCOA2 Non_Silent	0.000972142	NCOA2	PTPRT Non_Silent	0.00173433	PTPRT	118758904-118758905-chr11-Splice_Region-INS-----G	0.0014548	DDX6	ERBB3 UTR	0.00219587	ERBB3	POT1 Flank	0.00162208	POT1	ZMYM3 Synonymous	0.00225262	ZMYM3
143	PML Intron	0.000969497	PML	149542407-149542409-chr3-In_Frame_Del-DEL-CTG-CTG--	0.00171635	WWTR1	100712790-100712790-chr8-Splice_Site-SNP-C-C-T	0.0014528	PABPC1	29942488-29942488-chr6-5'UTR-SNP-G-G-A	0.00218743	HLA-A	33010542-33010542-chr1-3'Flank-SNP-G-G-A	0.00162208	AK2	KEAP1 Synonymous	0.00225201	KEAP1
144	33010786-33010786-chr1-3'Flank-SNP-C-C-T	0.000967133	AK2	CIC Non_Silent	0.00170321	CIC	EXT2 Intron	0.00145249	EXT2	54022277-54022279-chr8-5'UTR-DEL-GCG-GCG--	0.00218024	TCEA1	JUN Flank	0.00162208	JUN	POLG Synonymous	0.00224135	POLG
145	SMARCA4 Intron	0.000966981	SMARCA4	195782770-195782770-chr3-Missense_Mutation-SNP-A-A-G	0.00169391	MUC4	ZRSR2 Intron	0.00145234	ZRSR2	F3 UTR	0.00216597	F3	3797872-3797872-chr11-5'Flank-SNP-T-T-G	0.00162208	NUP98	77508435-77508435-chrX-Synonymous-SNP-A-A-C	0.00223793	ATRX
146	ACSL3 Intron	0.000966561	ACSL3	FAM47C Non_Silent	0.00168047	FAM47C	118903196-118903197-chr11-Intron-DEL-AG-AG--	0.00145067	BCL9L	BMPR1A UTR	0.00216565	BMPR1A	EN1 Flank	0.00162208	EN1	GLI1 Synonymous	0.00223422	GLI1
147	32648391-32648392-chr8-Intron-DEL-AG-AG--	0.000964851	NRG1	EP300 Non_Silent	0.00166236	EP300	140444464-140444465-chr2-Intron-DEL-GA-GA--	0.00144436	LRP1B	STAG1 UTR	0.00215427	STAG1	DDX5 Flank	0.00162208	DDX5	ABL1 Synonymous	0.0022135	ABL1
148	KTN1 Non_Silent	0.000963937	KTN1	71140830-71140832-chrX-In_Frame_Del-DEL-GCA-GCA--	0.00163912	MED12	AFF3 Intron	0.00144397	AFF3	CBL UTR	0.00213537	CBL	SRGAP3 Flank	0.00162208	SRGAP3	PCM1 Synonymous	0.00220153	PCM1
149	MUC4 Intron	0.000963792	MUC4	MUC1 Non_Silent	0.00163842	MUC1	PC Intron	0.00144352	PC	HSP90AB1 UTR	0.00212374	HSP90AB1	SP8 Flank	0.00162208	SP8	ZNF479 Synonymous	0.00220153	ZNF479
150	NOTCH2 Intron	0.000959375	NOTCH2	DDR2 Non_Silent	0.00163251	DDR2	66853402-66853402-chr11-Intron-SNP-T-T-G	0.00144341	PC	256463-256463-chr5-3'UTR-SNP-T-T-C	0.0021027	SDHA	MT3 Flank	0.00162208	MT3	MTCP1 Synonymous	0.00217785	MTCP1
151	NBEA Intron	0.000958757	NBEA	CASP8 Non_Silent	0.00163228	CASP8	MAP2 Intron	0.00144263	MAP2	222201298-222201299-chr2-3'UTR-INS-----C	0.00208872	PAX3	MSI2 Flank	0.00162208	MSI2	MN1 Synonymous	0.00215892	MN1
152	MAFB UTR	0.000955802	MAFB	115076417-115076417-chr9-Missense_Mutation-SNP-G-G-T	0.00162684	TNC	21617257-21617257-chr10-Intron-DEL-T-T--	0.00144131	MLLT10	DNMT3A UTR	0.00207967	DNMT3A	190179606-190179606-chr4-3'Flank-SNP-G-G-T	0.00162208	DUX4	CHEK2 Synonymous	0.00215656	CHEK2
153	7674220-7674220-chr17-Missense_Mutation-SNP-C-C-T	0.000954768	TP53	XPO1 Non_Silent	0.0016259	XPO1	101136678-101136678-chr10-Intron-SNP-G-G-T	0.00144096	TLX1	WWTR1 UTR	0.00207128	WWTR1	NFIB Flank	0.00162208	NFIB	CASC5 Synonymous	0.00215535	CASC5
154	CSMD3 Intron	0.000953039	CSMD3	PDGFRA Non_Silent	0.00159844	PDGFRA	13988635-13988635-chr7-Intron-SNP-C-C-A	0.00144064	ETV1	CCND2 UTR	0.00206819	CCND2	SSX1 Flank	0.00161409	SSX1	IRS4 Synonymous	0.00214387	IRS4
155	79599909-79599914-chr16-5'UTR-DEL-GCCGCC-GCCGCC--	0.000952522	MAF	HR Non_Silent	0.00159642	HR	ERC1 Intron	0.00143477	ERC1	FCGR2B UTR	0.00206076	FCGR2B	33012985-33012986-chr1-3'Flank-DEL-CA-CA--	0.00159954	AK2	8943575-8943575-chr19-Synonymous-SNP-C-C-G	0.00214296	MUC16
156	ALK Intron	0.000949282	ALK	POLQ Non_Silent	0.00158849	POLQ	ETV1 Intron	0.00142744	ETV1	SMC1A UTR	0.00204066	SMC1A	CD74 Flank	0.00159387	CD74	169381418-169381418-chr3-Synonymous-SNP-A-A-G	0.00214165	MECOM
157	SPECC1 Intron	0.000948924	SPECC1	122328162-122328162-chr12-Missense_Mutation-SNP-C-C-T	0.00157655	CLIP1	MTOR Intron	0.00142199	MTOR	MDM2 UTR	0.00203366	MDM2	CDKN1A Flank	0.00157865	CDKN1A	MTOR Synonymous	0.00213797	MTOR
158	EED Intron	0.000948704	EED	10064848-10064848-chr3-Missense_Mutation-SNP-C-C-T	0.00157422	FANCD2	2945755-2945755-chr7-Intron-SNP-G-G-C	0.0014173	CARD11	NF2 UTR	0.0020251	NF2	190179737-190179737-chr4-3'Flank-SNP-C-C-G	0.00156382	DUX4	T Synonymous	0.00213106	T
159	TRRAP Non_Silent	0.000946746	TRRAP	MYO5A Non_Silent	0.00155988	MYO5A	ELN Intron	0.00141368	ELN	PRRX1 UTR	0.00202482	PRRX1	CUX1 Flank	0.00155881	CUX1	5135282-5135282-chr17-Splice_Region-SNP-G-G-A	0.00212846	USP6
160	WAS Intron	0.000945609	WAS	15876576-15876576-chr1-Missense_Mutation-SNP-G-G-A	0.00155884	SPEN	61849023-61849023-chr17-Intron-SNP-T-T-G	0.00140806	BRIP1	LIFR UTR	0.00201339	LIFR	1203761-1203763-chr19-5'Flank-DEL-GAG-GAG--	0.00150541	STK11	PTPN13 Synonymous	0.00211109	PTPN13
161	RUNX1 Intron	0.000944519	RUNX1	NUP98 Non_Silent	0.00155411	NUP98	BRCA1 Intron	0.00140626	BRCA1	ETNK1 UTR	0.00198867	ETNK1	PRDM16 Flank	0.00149504	PRDM16	MITF Synonymous	0.00210769	MITF
162	MTA1 Intron	0.000943813	MTA1	15931542-15931542-chr1-Missense_Mutation-SNP-G-G-A	0.0015538	SPEN	PRKCB Intron	0.00140468	PRKCB	FAT1 UTR	0.00195713	FAT1	RGPD3 Flank	0.00148695	RGPD3	169116561-169116561-chr3-Synonymous-SNP-T-T-C	0.00209689	MECOM
163	CDH11 Intron	0.000943779	CDH11	72957814-72957816-chr16-In_Frame_Del-DEL-CCA-CCA--	0.00154848	ZFHX3	KAT6B Intron	0.00140282	KAT6B	JAZF1 UTR	0.00195321	JAZF1	ATR Flank	0.00147455	ATR	BIRC6 Synonymous	0.00209555	BIRC6
164	FANCD2 Non_Silent	0.000939967	FANCD2	HOXA13 Non_Silent	0.00154614	HOXA13	APC Intron	0.0014018	APC	HOXA11 UTR	0.00194799	HOXA11	ROS1 Flank	0.00146522	ROS1	TSHR Synonymous	0.00208205	TSHR
165	USP6 Intron	0.000939398	USP6	ETNK1 Non_Silent	0.00154107	ETNK1	HIP1 Intron	0.00139769	HIP1	100702961-100702961-chr8-3'UTR-SNP-A-A-G	0.00194168	PABPC1	190179651-190179651-chr4-3'Flank-SNP-C-C-A	0.00145859	DUX4	HOXA1 Synonymous	0.00207998	HOXA1
166	NCOA2 Intron	0.000939071	NCOA2	WWP2 Non_Silent	0.00154001	WWP2	NRAS Intron	0.0013967	NRAS	TEC UTR	0.00192438	TEC	PTPRB Flank	0.00143495	PTPRB	ARNT Synonymous	0.00205745	ARNT
167	PDE4DIP Intron	0.000932737	PDE4DIP	MYCN Non_Silent	0.00153851	MYCN	GK Intron	0.00138651	GK	SH3GL1 UTR	0.0019162	SH3GL1	IL21 Flank	0.00143495	IL21	256357-256357-chr5-Synonymous-SNP-G-G-A	0.00201245	SDHA
168	KMT2C Intron	0.000931252	KMT2C	207575361-207575361-chr2-Missense_Mutation-SNP-G-G-C	0.00153485	CREB1	PDE4D Intron	0.00137665	PDE4D	LARP4 UTR	0.00191286	LARP4	SMAD3 Flank	0.00143495	SMAD3	101357534-101357534-chrX-Synonymous-SNP-T-T-G	0.00199671	BTK
169	FAT3 Synonymous	0.000929274	FAT3	ABL1 Non_Silent	0.00153313	ABL1	55759144-55759144-chr6-Intron-SNP-C-C-A	0.00137578	BMP5	EPHA3 UTR	0.00191227	EPHA3	FCRL4 Flank	0.00143495	FCRL4	122328157-122328157-chr12-Synonymous-SNP-C-C-T	0.00199577	CLIP1
170	RCE1 Intron	0.000928547	RCE1	EXT1 Non_Silent	0.00152275	EXT1	CTNND1 Intron	0.00137241	CTNND1	T UTR	0.00190399	T	190179566-190179566-chr4-3'Flank-SNP-T-T-A	0.00143495	DUX4	74048167-74048167-chr7-Synonymous-SNP-T-T-G	0.0019932	ELN
171	50188800-50188803-chr17-Splice_Region-DEL-AGAG-AGAG--	0.000926978	COL1A1	44250099-44250099-chr6-Missense_Mutation-SNP-T-T-G	0.00152216	HSP90AB1	10046849-10046852-chr3-Intron-DEL-AATC-AATC--	0.00137112	FANCD2	BCL2 UTR	0.00187174	BCL2	VAV1 Flank	0.00143495	VAV1	29944135-29944135-chr6-Synonymous-SNP-A-A-G	0.00199146	HLA-A
172	SMAD4 Non_Silent	0.000926705	SMAD4	RANBP2 Non_Silent	0.00151943	RANBP2	NOTCH1 Intron	0.00137067	NOTCH1	41745775-41745777-chr4-3'UTR-DEL-CGC-CGC--	0.00186665	PHOX2B	NONO Flank	0.00143495	NONO	KMT2D Synonymous	0.00198972	KMT2D
173	118506082-118506082-chr11-Missense_Mutation-SNP-A-A-C	0.000925983	KMT2A	MLLT10 Non_Silent	0.00151427	MLLT10	BCL9L Intron	0.00136883	BCL9L	CUX1 UTR	0.00185946	CUX1	1295113-1295113-chr5-5'Flank-SNP-G-G-A	0.00143495	TERT	KIAA1549 Synonymous	0.00198764	KIAA1549
174	15244613-15244616-chr19-Intron-DEL-AGAC-AGAC--	0.000925941	BRD4	MED12 Non_Silent	0.00151383	MED12	CSMD3 Intron	0.00136674	CSMD3	NCOR2 UTR	0.00184516	NCOR2	CEP89 Flank	0.00143495	CEP89	92800126-92800126-chr11-Synonymous-SNP-C-C-T	0.00198723	FAT3
175	3728751-3728751-chr16-Missense_Mutation-SNP-G-G-C	0.000922479	CREBBP	PREX2 Non_Silent	0.00150992	PREX2	BLM Intron	0.00136212	BLM	142130786-142130788-chr2-5'UTR-DEL-CGG-CGG--	0.00184276	LRP1B	TPM3 Flank	0.00143495	TPM3	NTRK3 Synonymous	0.00198698	NTRK3
176	CHEK2 Synonymous	0.000922259	CHEK2	BCORL1 Non_Silent	0.00150652	BCORL1	63532431-63532432-chr20-Intron-DEL-GT-GT--	0.00136133	PTK6	ID3 UTR	0.0018398	ID3	190179679-190179679-chr4-3'Flank-SNP-G-G-T	0.0014128	DUX4	152235823-152235823-chr7-Synonymous-SNP-T-T-C	0.00197946	KMT2C
177	129206278-129206278-chr7-Missense_Mutation-SNP-A-A-C	0.000921254	SMO	162775794-162775794-chr1-Missense_Mutation-SNP-T-T-C	0.00149994	DDR2	FBXW7 Intron	0.00135995	FBXW7	EXT1 UTR	0.00183958	EXT1	106470871-106470871-chr2-5'Flank-SNP-C-C-T	0.0014076	RGPD3	BCL9 Synonymous	0.00197358	BCL9
178	122328157-122328157-chr12-Synonymous-SNP-C-C-T	0.000920759	CLIP1	AFF3 Non_Silent	0.00148837	AFF3	BIRC6 Intron	0.00135754	BIRC6	TP63 UTR	0.00183916	TP63	NACA Flank	0.0014076	NACA	RNF213 Synonymous	0.00196032	RNF213
179	EIF1AX Intron	0.000919313	EIF1AX	EML4 Non_Silent	0.00148347	EML4	SI Intron	0.00135411	SI	EGF UTR	0.00183051	EGF	33010841-33010841-chr1-3'Flank-SNP-A-A-G	0.0014076	AK2	86000684-86000684-chr11-Synonymous-SNP-T-T-G	0.00195853	PICALM
180	CHEK2 Non_Silent	0.000914795	CHEK2	87115030-87115030-chr4-Missense_Mutation-SNP-C-C-A	0.00147683	AFF1	CBFA2T3 Intron	0.00135324	CBFA2T3	TCEA1 UTR	0.00182986	TCEA1	KIT Flank	0.0014076	KIT	CACNA1D Synonymous	0.00195673	CACNA1D
181	MLLT10 Intron	0.000912716	MLLT10	36469721-36469722-chr1-Frame_Shift_Ins-INS-----G	0.00147576	CSF3R	BCL9 Intron	0.00134842	BCL9	BCL2L12 UTR	0.00182591	BCL2L12	190179579-190179579-chr4-3'Flank-SNP-T-T-A	0.0014076	DUX4	GNAS Synonymous	0.00195304	GNAS
182	BUB1 Synonymous	0.000912679	BUB1	100705604-100705604-chr8-Missense_Mutation-SNP-G-G-C	0.00147384	PABPC1	PIK3R1 Intron	0.0013475	PIK3R1	117627845-117627846-chr1-3'UTR-DEL-TG-TG--	0.00182289	FAM46C	190179690-190179690-chr4-3'Flank-SNP-G-G-C	0.0014076	DUX4	56094530-56094530-chr12-Synonymous-SNP-G-G-C	0.00194875	ERBB3
183	CRTC1 Flank	0.00091175	CRTC1	64860149-64860150-chr1-Frame_Shift_Ins-INS-----G	0.00146659	JAK1	8896143-8896143-chr19-Intron-SNP-G-G-A	0.0013473	MUC16	MLLT11 UTR	0.00182229	MLLT11	190179565-190179565-chr4-3'Flank-SNP-G-G-T	0.0014076	DUX4	CHST11 Synonymous	0.00194725	CHST11
184	SUZ12 Intron	0.000910836	SUZ12	CTNND2 Non_Silent	0.00146645	CTNND2	SETD2 Intron	0.00134372	SETD2	HMGN2 UTR	0.00181194	HMGN2	BCL3 Flank	0.0014076	BCL3	MKL1 Synonymous	0.00190652	MKL1
185	PDE4D Intron	0.000910139	PDE4D	87134568-87134568-chr4-Missense_Mutation-SNP-G-G-C	0.0014602	AFF1	CASC5 Intron	0.00133952	CASC5	PDGFRA UTR	0.00180859	PDGFRA	LARP4 Flank	0.00139483	LARP4	8886841-8886841-chr19-Synonymous-SNP-C-C-T	0.0019041	MUC16
186	CARS Intron	0.000908746	CARS	DCC Non_Silent	0.00145521	DCC	42293915-42293915-chr19-Intron-SNP-T-T-G	0.00132958	CIC	CD28 UTR	0.0017949	CD28	50400882-50400882-chr12-5'Flank-SNP-A-A-G	0.00131671	LARP4	100709179-100709179-chr8-Synonymous-SNP-T-T-C	0.00189886	PABPC1
187	MYH1 Synonymous	0.000905174	MYH1	GRIN2A Non_Silent	0.00144559	GRIN2A	CDH11 Intron	0.00132908	CDH11	TCF7L2 UTR	0.00175175	TCF7L2	33010831-33010832-chr1-3'Flank-INS-----GGATGT	0.00131149	AK2	STIL Synonymous	0.00189794	STIL
188	156134461-156134461-chr1-Missense_Mutation-SNP-T-T-G	0.000904817	LMNA	50492793-50492793-chr15-Missense_Mutation-SNP-T-T-C	0.00143472	USP8	15244613-15244616-chr19-Intron-DEL-AGAC-AGAC--	0.00132908	BRD4	78031299-78031299-chr9-5'UTR-SNP-C-C-T	0.00175033	GNAQ	NFE2L2 Flank	0.00128138	NFE2L2	33013253-33013253-chr1-Synonymous-SNP-G-G-A	0.001897	AK2
189	PTPRC Intron	0.000904309	PTPRC	ALK Non_Silent	0.00143051	ALK	52648314-52648316-chr3-Intron-DEL-AAC-AAC--	0.00132771	PBRM1	170572293-170572293-chr6-3'UTR-SNP-A-A-C	0.0017464	TBP	ZNF479 Flank	0.00126766	ZNF479	ROBO2 Synonymous	0.00189427	ROBO2
190	44248808-44248809-chr6-Intron-DEL-TT-TT--	0.000904257	HSP90AB1	33320121-33320123-chr6-In_Frame_Del-DEL-TCC-TCC--	0.00142884	DAXX	3777568-3777568-chr16-Intron-SNP-T-T-G	0.00132616	CREBBP	ROBO2 UTR	0.00171993	ROBO2	WNK2 Flank	0.00126308	WNK2	195788433-195788433-chr3-Synonymous-SNP-T-T-A	0.00189165	MUC4
191	RUNX1T1 Intron	0.000903768	RUNX1T1	KMT2D Non_Silent	0.00141633	KMT2D	55201370-55201371-chr7-Intron-DEL-TC-TC--	0.00132547	EGFR	TMEM127 UTR	0.00171928	TMEM127	10732493-10732493-chr22-3'Flank-SNP-G-G-A	0.00126251	U2	102288240-102288240-chr8-Synonymous-SNP-T-T-C	0.00187358	UBR5
192	136736576-136736576-chr3-Intron-SNP-G-G-T	0.000898992	STAG1	41933754-41933754-chr8-Missense_Mutation-SNP-T-T-G	0.00141572	KAT6A	NT5C2 Intron	0.00132508	NT5C2	SKI UTR	0.00171083	SKI	190179673-190179673-chr4-3'Flank-SNP-G-G-C	0.00123023	DUX4	NCOR2 Synonymous	0.00186461	NCOR2
193	108733164-108733164-chrX-Missense_Mutation-SNP-A-A-G	0.000896714	IRS4	HSP90AB1 Non_Silent	0.00141362	HSP90AB1	7747454-7747454-chr19-Intron-SNP-A-A-C	0.00132379	CD209	EPAS1 UTR	0.00171034	EPAS1	RIN2 Flank	0.0012187	RIN2	ARID1A Synonymous	0.00185279	ARID1A
194	102875613-102875613-chr13-Missense_Mutation-SNP-A-A-C	0.000892562	ERCC5	SALL4 Non_Silent	0.00141006	SALL4	FGFR1 Intron	0.00132227	FGFR1	LRP1B UTR	0.00169567	LRP1B	CASP8 Flank	0.0012187	CASP8	CSF3R Synonymous	0.00185036	CSF3R
195	BIRC6 Non_Silent	0.000891001	BIRC6	COL3A1 Non_Silent	0.00140321	COL3A1	43057017-43057017-chr17-Intron-SNP-T-T-G	0.00131841	BRCA1	C7 UTR	0.00169507	C7	167976288-167976288-chr6-3'Flank-SNP-T-T-G	0.0012187	MLLT4	152265172-152265172-chr7-Synonymous-SNP-C-C-T	0.00184957	KMT2C
196	FANCD2 Intron	0.000890764	FANCD2	NCOA2 Non_Silent	0.00140273	NCOA2	29944102-29944102-chr6-Intron-SNP-T-T-G	0.00131499	HLA-A	IRF4 UTR	0.00169203	IRF4	CCR4 Flank	0.0012187	CCR4	TRRAP Synonymous	0.00183174	TRRAP
197	103089679-103089681-chr10-In_Frame_Del-DEL-TCC-TCC--	0.000889533	NT5C2	LIFR Non_Silent	0.00139811	LIFR	SET Intron	0.0013125	SET	NUTM2A UTR	0.0016774	NUTM2A	APOBEC3B Flank	0.0012187	APOBEC3B	TG Synonymous	0.00182559	TG
198	ROBO2 Intron	0.000888705	ROBO2	SLC45A3 Non_Silent	0.00139535	SLC45A3	PTPN11 Intron	0.00131244	PTPN11	SLC45A3 UTR	0.00167375	SLC45A3	TRIM2 Flank	0.0012187	TRIM2	DNMT3A Synonymous	0.00182474	DNMT3A
199	CARD11 Intron	0.0008874	CARD11	57178583-57178583-chr12-Missense_Mutation-SNP-A-A-C	0.00138913	LRP1	177204056-177204056-chr5-Intron-SNP-T-T-G	0.00131104	NSD1	ID2 UTR	0.00166043	ID2	COL1A1 Flank	0.0012187	COL1A1	EP300 Synonymous	0.00181698	EP300
200	HOOK3 Intron	0.000886233	HOOK3	CIITA Non_Silent	0.0013873	CIITA	8896102-8896103-chr19-Intron-INS-----GT	0.00130493	MUC16	BUB1B UTR	0.00165938	BUB1B	RP1 Flank	0.0012187	RP1	CHD4 Synonymous	0.00181407	CHD4
201	CAMTA1 Intron	0.000883797	CAMTA1	77652292-77652294-chrX-In_Frame_Del-DEL-TCC-TCC--	0.00138575	ATRX	POT1 Intron	0.00130475	POT1	CIITA UTR	0.00164991	CIITA	RHO Flank	0.0012187	RHO	34088401-34088401-chr9-Synonymous-SNP-T-T-C	0.00179809	DCAF12
202	EGFR Intron	0.000880788	EGFR	GNAQ Non_Silent	0.00138428	GNAQ	ECT2 Intron	0.00130461	ECT2	LSM14A UTR	0.00163525	LSM14A	10737824-10737824-chr22-5'Flank-SNP-C-C-T	0.0012187	U2	186620946-186620946-chr4-Synonymous-SNP-G-G-T	0.00179158	FAT1
203	FUBP1 Intron	0.000880259	FUBP1	49034264-49034264-chr12-Missense_Mutation-SNP-A-A-C	0.00137729	KMT2D	PTCH1 Intron	0.0013038	PTCH1	DCT UTR	0.00163518	DCT	TAL1 Flank	0.0012187	TAL1	C3 Synonymous	0.00179157	C3
204	11110877-11110879-chr5-In_Frame_Del-DEL-TTC-TTC--	0.000877688	CTNND2	ARHGAP5 Non_Silent	0.00137633	ARHGAP5	152235791-152235791-chr7-Intron-SNP-G-G-T	0.00129808	KMT2C	GAS7 UTR	0.00163167	GAS7	KTN1 Flank	0.00118653	KTN1	SP8 Synonymous	0.00177396	SP8
205	MUC16 Non_Silent	0.000877561	MUC16	KTN1 Non_Silent	0.0013742	KTN1	FHIT Intron	0.00129548	FHIT	FBLN2 UTR	0.00162825	FBLN2	MUC4 Flank	0.00117921	MUC4	ANK1 Synonymous	0.00176942	ANK1
206	CNOT3 Intron	0.000876161	CNOT3	99828334-99828336-chr9-In_Frame_Del-DEL-CAC-CAC--	0.00136752	NR4A3	TAF1 Intron	0.00128691	TAF1	100703121-100703121-chr8-3'UTR-SNP-G-G-T	0.00162486	PABPC1	FAT3 Flank	0.00116253	FAT3	32439518-32439518-chr2-Synonymous-SNP-A-A-G	0.00176579	BIRC6
207	CDH1 Intron	0.00087569	CDH1	POLE Non_Silent	0.00136713	POLE	EP300 Intron	0.00128562	EP300	94439863-94439863-chr13-3'UTR-SNP-G-G-T	0.00161643	DCT	KCNJ5 Flank	0.00108147	KCNJ5	256393-256393-chr5-Synonymous-SNP-C-C-T	0.00174689	SDHA
208	10046898-10046898-chr3-Intron-SNP-G-G-A	0.000875555	FANCD2	DICER1 Non_Silent	0.00136152	DICER1	WNK2 Intron	0.00128556	WNK2	OLIG2 UTR	0.00160938	OLIG2	190179581-190179581-chr4-3'Flank-SNP-C-C-T	0.000977126	DUX4	PF4 Synonymous	0.00174564	PF4
209	10046914-10046915-chr3-Intron-INS-----C	0.000874876	FANCD2	38428396-38428398-chr8-In_Frame_Del-DEL-TCA-TCA--	0.00136041	FGFR1	114398011-114398014-chr1-Intron-DEL-AAAA-AAAA--	0.00128083	TRIM33	LASP1 UTR	0.00160309	LASP1	ZNF384 Flank	0.000973518	ZNF384	JAK2 Synonymous	0.00173406	JAK2
210	ERBB3 Non_Silent	0.000874499	ERBB3	BCLAF1 Non_Silent	0.00135529	BCLAF1	CCNB1 Intron	0.00127821	CCNB1	SMARCB1 UTR	0.00160116	SMARCB1	TFRC Flank	0.000822652	TFRC	8964524-8964524-chr19-Synonymous-SNP-A-A-G	0.0017185	MUC16
211	58709370-58709370-chr18-Splice_Region-SNP-A-A-T	0.00087448	MALT1	PTPRK Non_Silent	0.00135272	PTPRK	QKI Intron	0.00127208	QKI	HLA-A UTR	0.00160093	HLA-A	MAF Flank	0.000686466	MAF	100006908-100006908-chr2-Synonymous-SNP-T-T-G	0.0017114	AFF3
212	31096742-31096742-chr8-Intron-SNP-C-C-T	0.000874076	WRN	TRIM24 Non_Silent	0.00135073	TRIM24	CDH1 Intron	0.00127036	CDH1	TNFRSF17 UTR	0.00158573	TNFRSF17	33010752-33010752-chr1-3'Flank-SNP-C-C-T	0.00065824	AK2	46739345-46739345-chr11-Synonymous-SNP-C-C-T	0.00170129	F2
213	58782987-58782987-chr1-Nonsense_Mutation-SNP-G-G-T	0.000873892	JUN	6582652-6582652-chr12-Missense_Mutation-SNP-C-C-A	0.00134917	CHD4	GPC3 Intron	0.00126752	GPC3	100703167-100703167-chr8-3'UTR-SNP-A-A-G	0.00158051	PABPC1	STIL Flank	0.000635523	STIL	HLA-A Synonymous	0.00167347	HLA-A
214	CSMD3 Synonymous	0.000873676	CSMD3	AFF1 Non_Silent	0.00134678	AFF1	PREX2 Intron	0.00126244	PREX2	PER1 UTR	0.00156856	PER1	WWTR1 Flank	0.000606086	WWTR1	29944132-29944132-chr6-Synonymous-SNP-G-G-A	0.00166855	HLA-A
215	BRCA2 Intron	0.000870917	BRCA2	MYH11 Non_Silent	0.00134344	MYH11	TFPT Intron	0.00126101	TFPT	CHD2 UTR	0.00155533	CHD2	LMO2 Flank	0.000467902	LMO2	32092970-32092970-chr14-Synonymous-SNP-T-T-C	0.00166639	ARHGAP5
216	SLC34A2 Intron	0.000869916	SLC34A2	125415028-125415028-chr4-Missense_Mutation-SNP-A-A-C	0.00134131	FAT4	AKT2 Intron	0.00126024	AKT2	20141792-20141792-chrX-5'UTR-SNP-G-G-A	0.00154394	EIF1AX	SDHC Flank	0.000430452	SDHC	RANBP2 Synonymous	0.00166089	RANBP2
217	WWP2 Intron	0.000869893	WWP2	95979655-95979655-chr11-Missense_Mutation-SNP-C-C-A	0.00134075	MAML2	KIT Intron	0.00125577	KIT	ARC UTR	0.00153501	ARC	SLC34A2 Flank	0.000410688	SLC34A2	58363586-58363586-chr17-Synonymous-SNP-A-A-C	0.00165701	RNF43
218	140444464-140444465-chr2-Intron-DEL-GA-GA--	0.000869715	LRP1B	HSP90AA1 Non_Silent	0.00134027	HSP90AA1	TP53 Intron	0.00125518	TP53	109910737-109910738-chr1-5'UTR-DEL-GT-GT--	0.00153055	CSF1	RGS7 Flank	0.00037702	RGS7	FOXO3 Synonymous	0.00163779	FOXO3
219	BARD1 Non_Silent	0.000868711	BARD1	AKAP9 Non_Silent	0.00133604	AKAP9	8896139-8896139-chr19-Intron-SNP-T-T-A	0.00125497	MUC16	RBM10 UTR	0.00152607	RBM10	KDM6A Flank	0.000354672	KDM6A	PABPC1 Synonymous	0.00163194	PABPC1
220	ROS1 Non_Silent	0.000868111	ROS1	72787695-72787697-chr16-In_Frame_Del-DEL-GCC-GCC--	0.00133603	ZFHX3	193142099-193142102-chr1-Intron-DEL-GAGA-GAGA--	0.00124714	CDC73	29054981-29054982-chr22-3'UTR-DEL-AG-AG--	0.00152483	ZNRF3	COL2A1 Flank	0.0003318	COL2A1	CLTCL1 Synonymous	0.00163048	CLTCL1
221	5135261-5135261-chr17-Synonymous-SNP-G-G-C	0.000867708	USP6	148931920-148931920-chr1-Missense_Mutation-SNP-G-G-T	0.0013292	PDE4DIP	10046830-10046830-chr3-Intron-SNP-T-T-C	0.00124215	FANCD2	ERC1 UTR	0.00152107	ERC1	AFF3 Flank	0.000311083	AFF3	AKT1 Synonymous	0.00162514	AKT1
222	2926832-2926833-chr7-Intron-DEL-GT-GT--	0.000864445	CARD11	ITGAV Non_Silent	0.00131578	ITGAV	ABL2 Intron	0.00124207	ABL2	53486100-53486100-chr5-3'UTR-SNP-G-G-A	0.00151932	FST	NUP98 Flank	0.000259481	NUP98	FAM46C Synonymous	0.00161291	FAM46C
223	TBL1XR1 UTR	0.000862221	TBL1XR1	53453081-53453082-chr4-Frame_Shift_Del-DEL-AG-AG--	0.00129827	FIP1L1	CYLD Intron	0.00123984	CYLD	78031296-78031296-chr9-5'UTR-SNP-A-A-G	0.00151335	GNAQ	NF1 Flank	0.00012809	NF1	PIM1 Synonymous	0.00160801	PIM1
224	NT5C2 Intron	0.000862079	NT5C2	NOTCH2 Non_Silent	0.00129499	NOTCH2	FIP1L1 Intron	0.00123972	FIP1L1	6688168-6688169-chr12-Splice_Region-DEL-CT-CT--	0.00150902	ZNF384	TNFRSF14 Flank	9.22461e-05	TNFRSF14	FAM135B Synonymous	0.0015973	FAM135B
225	KAT6B Non_Silent	0.000860087	KAT6B	ZNRF3 Non_Silent	0.0012897	ZNRF3	10981587-10981588-chr5-Intron-DEL-AC-AC--	0.00123517	CTNND2	AKT3 UTR	0.00150868	AKT3	33010835-33010836-chr1-3'Flank-INS-----TTGGA	7.24934e-05	AK2	72957581-72957581-chr16-Synonymous-SNP-T-T-G	0.00159569	ZFHX3
226	FANCE Non_Silent	0.000859218	FANCE	117818480-117818480-chr8-Missense_Mutation-SNP-C-C-G	0.00128652	EXT1	SLC34A2 Intron	0.00123116	SLC34A2	TNFRSF14 UTR	0.00150766	TNFRSF14	FANCD2 Flank	4.44671e-05	FANCD2	152265043-152265043-chr7-Synonymous-SNP-G-G-A	0.00159455	KMT2C
227	1956141-1956141-chr4-Missense_Mutation-SNP-G-G-C	0.000858529	WHSC1	ATM Non_Silent	0.00128404	ATM	FANCE Intron	0.00122919	FANCE	ARHGEF12 UTR	0.00150332	ARHGEF12	MDM2 Flank	8.7047e-06	MDM2	64192840-64192840-chrX-Synonymous-SNP-T-T-C	0.00156927	AMER1
228	108751415-108751415-chr2-Synonymous-SNP-A-A-G	0.000856614	RANBP2	92883319-92883319-chr11-Missense_Mutation-SNP-A-A-C	0.00128204	FAT3	ATIC Intron	0.00122889	ATIC	MAFB UTR	0.00150332	MAFB				BRD3 Synonymous	0.00156408	BRD3
229	ASXL1 Intron	0.000855352	ASXL1	100715573-100715573-chr8-Missense_Mutation-SNP-C-C-T	0.00127965	PABPC1	NIN Intron	0.001225	NIN	100703148-100703149-chr8-3'UTR-DEL-TT-TT--	0.00150065	PABPC1				PRDM2 Synonymous	0.00155814	PRDM2
230	NFE2L2 Non_Silent	0.000854283	NFE2L2	DEK Non_Silent	0.00126408	DEK	MITF Intron	0.00121961	MITF	60553287-60553289-chr2-5'UTR-DEL-GGC-GGC--	0.00149512	BCL11A				GRM3 Synonymous	0.00155225	GRM3
231	23627049-23627050-chr1-5'Flank-DEL-GA-GA--	0.000852397	MDS2	CHST11 Non_Silent	0.00126334	CHST11	10048150-10048150-chr3-Intron-SNP-A-A-T	0.00121889	FANCD2	BMP5 UTR	0.00149415	BMP5				161673192-161673192-chr1-Synonymous-SNP-G-G-A	0.00153783	FCGR2B
232	ACSL6 Intron	0.00085137	ACSL6	CDK1 Non_Silent	0.00126324	CDK1	BCORL1 Intron	0.00121851	BCORL1	LARP4B UTR	0.00149173	LARP4B				55155858-55155858-chr7-Synonymous-SNP-G-G-C	0.00152976	EGFR
233	195785774-195785774-chr3-Missense_Mutation-SNP-G-G-A	0.00084984	MUC4	BRCA2 Non_Silent	0.00126188	BRCA2	JAK3 Intron	0.00121819	JAK3	100703052-100703058-chr8-3'UTR-DEL-AAAGGAA-AAAGGAA--	0.00149077	PABPC1				33013271-33013271-chr1-Synonymous-SNP-G-G-A	0.00152178	AK2
234	SI Non_Silent	0.000848825	SI	108767711-108767711-chr2-Missense_Mutation-SNP-C-C-G	0.00125812	RANBP2	92000141-92000142-chr14-Intron-DEL-AC-AC--	0.00121585	TRIP11	EML4 UTR	0.00148833	EML4				110661809-110661809-chr2-Synonymous-SNP-G-G-T	0.0015217	BUB1
235	ATP1A1 Intron	0.000848462	ATP1A1	IRS4 Non_Silent	0.00125327	IRS4	152265028-152265028-chr7-Intron-SNP-G-G-T	0.00121266	KMT2C	256547-256547-chr5-3'UTR-SNP-A-A-G	0.00148623	SDHA				5142088-5142088-chr17-Synonymous-SNP-A-A-C	0.00150192	USP6
236	175077488-175077488-chr1-Missense_Mutation-SNP-G-G-C	0.000848462	TNN	TSHR Non_Silent	0.00125115	TSHR	CLIP1 Intron	0.00120782	CLIP1	PIM1 UTR	0.00148437	PIM1				SP1 Synonymous	0.00148194	SP1
237	8960747-8960747-chr19-Synonymous-SNP-T-T-G	0.000848462	MUC16	30653607-30653607-chrX-Missense_Mutation-SNP-C-C-A	0.00125024	GK	CBLB Intron	0.00120769	CBLB	HNRNPA2B1 UTR	0.00148356	HNRNPA2B1				FBLN2 Synonymous	0.00148192	FBLN2
238	CREBBP Non_Silent	0.000848249	CREBBP	LRP1 Non_Silent	0.00124975	LRP1	BRD4 Intron	0.00120565	BRD4	CDK1 UTR	0.0014698	CDK1				TRIM3 Synonymous	0.00147956	TRIM3
239	ARID1B Intron	0.000848081	ARID1B	KEAP1 Non_Silent	0.00124898	KEAP1	UBP1 Intron	0.001205	UBP1	MECOM UTR	0.00146406	MECOM				NOTCH2 Synonymous	0.00146628	NOTCH2
240	RABEP1 Intron	0.000846601	RABEP1	32092134-32092134-chr14-Missense_Mutation-SNP-G-G-A	0.00124492	ARHGAP5	161673275-161673275-chr1-Intron-SNP-G-G-C	0.00119359	FCGR2B	PPP6C UTR	0.00145907	PPP6C				29944144-29944144-chr6-Synonymous-SNP-C-C-T	0.0014507	HLA-A
241	PMS1 Intron	0.000845968	PMS1	108917908-108917910-chr11-In_Frame_Del-DEL-TGA-TGA--	0.00124116	DDX10	ARID1B Intron	0.00119151	ARID1B	100703216-100703216-chr8-3'UTR-SNP-G-G-T	0.00145451	PABPC1				2080250-2080250-chr16-Synonymous-SNP-A-A-C	0.00144912	TSC2
242	SMARCB1 Intron	0.000845008	SMARCB1	ZEB1 Non_Silent	0.00123805	ZEB1	FGFR2 Intron	0.00119147	FGFR2	FBL UTR	0.00144807	FBL				MAML2 Synonymous	0.00144881	MAML2
243	JAZF1 Intron	0.000844957	JAZF1	PDGFRB Non_Silent	0.00123417	PDGFRB	GRIN2A Intron	0.00118964	GRIN2A	RHOH UTR	0.00144807	RHOH				CTNNA2 Synonymous	0.00144705	CTNNA2
244	AKT2 Intron	0.000841014	AKT2	MSH6 Non_Silent	0.00123117	MSH6	SUFU Intron	0.00118839	SUFU	ASXL1 UTR	0.00144541	ASXL1				8886787-8886787-chr19-Synonymous-SNP-C-C-T	0.00144556	MUC16
245	CDC6 Intron	0.000836851	CDC6	RECQL4 Non_Silent	0.00122682	RECQL4	PDGFRA Intron	0.00118662	PDGFRA	GPC3 UTR	0.00144248	GPC3				CCND1 Synonymous	0.00143605	CCND1
246	CSMD3 Non_Silent	0.000836607	CSMD3	TPR Non_Silent	0.00122613	TPR	ARNT Intron	0.0011848	ARNT	AMER1 UTR	0.0014406	AMER1				236538-236538-chr5-Synonymous-SNP-C-C-A	0.00142846	SDHA
247	8907564-8907565-chr19-Intron-DEL-GT-GT--	0.000836574	MUC16	WNK2 Non_Silent	0.00122511	WNK2	LYL1 Intron	0.00118198	LYL1	HR UTR	0.00143971	HR				ATM Synonymous	0.0014277	ATM
248	TRIP11 Intron	0.00083589	TRIP11	CDKN2A Non_Silent	0.00122504	CDKN2A	RAP1GDS1 Intron	0.00118085	RAP1GDS1	USP6 UTR	0.00143883	USP6				TMPRSS2 Synonymous	0.00142301	TMPRSS2
249	MGA Non_Silent	0.000834416	MGA	PRDM16 Non_Silent	0.00122147	PRDM16	46726628-46726628-chr11-Splice_Site-SNP-T-T-G	0.00117982	F2	31375013-31375016-chr17-3'UTR-DEL-TATA-TATA--	0.00143786	NF1				HR Synonymous	0.001409	HR
250	2945728-2945735-chr7-Intron-DEL-ACACACAC-ACACACAC--	0.000834154	CARD11	65537615-65537617-chr17-In_Frame_Del-DEL-TGG-TGG--	0.00122098	AXIN2	EIF1 Intron	0.00117913	EIF1	55321020-55321021-chr17-3'UTR-DEL-TG-TG--	0.00143309	HLF				BUB1B Synonymous	0.00140753	BUB1B
251	TCF12 Intron	0.000833802	TCF12	75030842-75030842-chr10-Nonsense_Mutation-SNP-C-C-A	0.0012201	KAT6B	CHD7 Intron	0.0011783	CHD7	BARD1 UTR	0.00143309	BARD1				ARID2 Synonymous	0.00140457	ARID2
252	100715486-100715486-chr8-Missense_Mutation-SNP-G-G-A	0.000833124	PABPC1	77477462-77477462-chr3-Missense_Mutation-SNP-C-C-G	0.00121923	ROBO2	FLT4 Intron	0.001178	FLT4	33026754-33026755-chr21-5'UTR-DEL-CT-CT--	0.00143309	OLIG2				44253562-44253562-chr6-Synonymous-SNP-C-C-T	0.00140057	HSP90AB1
253	CASP8 Intron	0.000831885	CASP8	100709481-100709481-chr8-Missense_Mutation-SNP-T-T-A	0.00121738	PABPC1	118909876-118909877-chr11-Intron-DEL-CA-CA--	0.00117623	BCL9L	CBFA2T3 UTR	0.00143309	CBFA2T3				134050428-134050428-chr9-Synonymous-SNP-A-A-G	0.00139093	BRD3
254	TFRC Intron	0.000831221	TFRC	157207311-157207311-chr6-Missense_Mutation-SNP-T-T-G	0.00121602	ARID1B	THRA Intron	0.00117592	THRA	60459935-60459936-chr2-3'UTR-DEL-TC-TC--	0.00143309	BCL11A				29942858-29942858-chr6-Synonymous-SNP-C-C-A	0.00138911	HLA-A
255	AK2 Synonymous	0.00083115	AK2	KIT Non_Silent	0.0012146	KIT	TBL1X Intron	0.00116829	TBL1X	WT1 UTR	0.00142738	WT1				100712676-100712676-chr8-Synonymous-SNP-T-T-C	0.00138699	PABPC1
256	26475271-26475271-chr1-3'UTR-SNP-G-G-T	0.000830452	HMGN2	77922196-77922196-chr9-Missense_Mutation-SNP-T-T-A	0.00121184	GNAQ	WHSC1 Intron	0.00116826	WHSC1	18777397-18777397-chr19-3'UTR-SNP-A-A-C	0.00142738	CRTC1				BCL11A Synonymous	0.00137974	BCL11A
257	FAT4 Non_Silent	0.000830154	FAT4	104757028-104757028-chr12-Missense_Mutation-SNP-C-C-A	0.00121166	CHST11	CCND1 Intron	0.0011645	CCND1	ESR1 UTR	0.00142472	ESR1				NF1 Synonymous	0.00137503	NF1
258	TAL1 Intron	0.000829793	TAL1	12590888-12590888-chr3-Missense_Mutation-SNP-C-C-G	0.00121026	RAF1	195811631-195811634-chr3-Intron-DEL-TCTC-TCTC--	0.00116297	MUC4	ZNF384 UTR	0.00142472	ZNF384				EGF Synonymous	0.00136709	EGF
259	35824131-35824135-chr17-Frame_Shift_Del-DEL-TCACA-TCACA--	0.000829518	TAF15	33013330-33013330-chr1-Missense_Mutation-SNP-G-G-C	0.00120064	AK2	BRD3 Intron	0.00115732	BRD3	138586000-138586000-chr7-3'UTR-DEL-T-T--	0.00142472	TRIM24				PRKCB Synonymous	0.00136483	PRKCB
260	TERT Intron	0.000828234	TERT	TLX3 Non_Silent	0.00120042	TLX3	17027879-17027881-chr1-Intron-DEL-GAA-GAA--	0.00115599	SDHB	SLC34A2 UTR	0.00142472	SLC34A2				KDR Synonymous	0.00136483	KDR
261	ARHGEF1 Intron	0.000828113	ARHGEF1	100715522-100715522-chr8-Missense_Mutation-SNP-T-T-C	0.00119701	PABPC1	59814600-59814603-chr10-Intron-DEL-ACAC-ACAC--	0.00115571	CCDC6	GRIN2A UTR	0.00141643	GRIN2A				LRP1 Synonymous	0.0013599	LRP1
262	GPC3 Intron	0.000821584	GPC3	ERCC3 Non_Silent	0.00119675	ERCC3	BCL3 Intron	0.00115475	BCL3	112224621-112224621-chr8-3'UTR-SNP-T-T-C	0.00141392	CSMD3				8896017-8896017-chr19-Synonymous-SNP-A-A-T	0.00134188	MUC16
263	FOXO3 Synonymous	0.000821288	FOXO3	BRD3 Non_Silent	0.0011947	BRD3	CA4 Intron	0.00115066	CA4	MALT1 UTR	0.00141292	MALT1				29944375-29944375-chr6-Synonymous-SNP-C-C-A	0.00134188	HLA-A
264	BCL3 Intron	0.000821221	BCL3	152265180-152265180-chr7-Missense_Mutation-SNP-C-C-T	0.00119392	KMT2C	99005118-99005118-chr7-Intron-SNP-C-C-T	0.0011469	TRRAP	FOXO3 UTR	0.00140976	FOXO3				MSN Synonymous	0.00133307	MSN
265	POLE Intron	0.000821159	POLE	41236628-41236628-chr3-Missense_Mutation-SNP-C-C-A	0.00118952	CTNNB1	136568699-136568699-chr3-Intron-SNP-T-T-G	0.00114468	STAG1	KIT UTR	0.00140567	KIT				HIC2 Synonymous	0.00133307	HIC2
266	50188800-50188801-chr17-Splice_Region-DEL-AG-AG--	0.000819869	COL1A1	103089679-103089681-chr10-In_Frame_Del-DEL-TCC-TCC--	0.00118699	NT5C2	175079968-175079969-chr1-Intron-DEL-GT-GT--	0.00114236	TNN	44253648-44253648-chr6-3'UTR-DEL-G-G--	0.00140424	HSP90AB1				195785391-195785391-chr3-Synonymous-SNP-C-C-G	0.00133078	MUC4
267	SDHA Synonymous	0.000818932	SDHA	EPAS1 Non_Silent	0.0011845	EPAS1	44789972-44789972-chr19-Intron-SNP-C-C-G	0.00113976	CBLC	8985094-8985095-chr3-3'UTR-DEL-AT-AT--	0.00138813	SRGAP3				PTPRC Synonymous	0.00133078	PTPRC
268	41236628-41236628-chr3-Missense_Mutation-SNP-C-C-A	0.000817935	CTNNB1	C2orf44 Non_Silent	0.00118385	C2orf44	SMAD2 Intron	0.00113845	SMAD2	EP300 UTR	0.00136815	EP300				CBL Synonymous	0.00133078	CBL
269	CCND3 Intron	0.000817419	CCND3	WHSC1 Non_Silent	0.00117697	WHSC1	PTPN13 Intron	0.00113764	PTPN13	256558-256558-chr5-3'UTR-SNP-T-T-C	0.0013379	SDHA				118900770-118900770-chr11-Synonymous-SNP-C-C-G	0.00132554	BCL9L
270	PABPC1 Non_Silent	0.000817251	PABPC1	152248140-152248140-chr7-Missense_Mutation-SNP-T-T-C	0.00117379	KMT2C	NRG1 Intron	0.00113646	NRG1	PDGFRB UTR	0.00132747	PDGFRB				WWP2 Synonymous	0.00132197	WWP2
271	PER1 Intron	0.000816338	PER1	129206278-129206278-chr7-Missense_Mutation-SNP-A-A-C	0.00117116	SMO	57099758-57099758-chr12-Intron-SNP-T-T-G	0.0011319	STAT6	EPS15 UTR	0.00132716	EPS15				IKZF1 Synonymous	0.00132197	IKZF1
272	27095700-27095700-chr7-Synonymous-SNP-G-G-A	0.000815897	HOXA1	100709214-100709214-chr8-Missense_Mutation-SNP-G-G-A	0.00117097	PABPC1	ACSL6 Intron	0.00113182	ACSL6	ELF3 UTR	0.00131746	ELF3				153270400-153270400-chr4-Synonymous-SNP-C-C-A	0.00131599	TRIM2
273	99601549-99601551-chr2-In_Frame_Del-DEL-GCT-GCT--	0.00081427	AFF3	127289368-127289370-chr2-In_Frame_Del-DEL-TCT-TCT--	0.00117072	ERCC3	112241842-112241843-chr8-Intron-INS-----CACA	0.00112889	CSMD3	HOXD11 UTR	0.00131638	HOXD11				8886805-8886805-chr19-Synonymous-SNP-C-C-A	0.00131444	MUC16
274	BAP1 Intron	0.000813798	BAP1	122328152-122328152-chr12-Missense_Mutation-SNP-A-A-C	0.0011661	CLIP1	HOOK3 Intron	0.00112834	HOOK3	RGPD3 UTR	0.00131397	RGPD3				CARS Synonymous	0.00131444	CARS
275	106425156-106425156-chr2-Missense_Mutation-SNP-A-A-C	0.000810722	RGPD3	RHOA Non_Silent	0.00115911	RHOA	CLTCL1 Intron	0.0011257	CLTCL1	MAP2K1 UTR	0.00130836	MAP2K1				PDCD1 Synonymous	0.00129902	PDCD1
276	NCOR2 Synonymous	0.000810418	NCOR2	GATA3 Non_Silent	0.00115879	GATA3	FUS Intron	0.00112564	FUS	HMGA2 UTR	0.00130485	HMGA2				PML Synonymous	0.00129902	PML
277	175146935-175146935-chr1-Missense_Mutation-SNP-T-T-G	0.000808897	TNN	F5 Non_Silent	0.00115487	F5	105751385-105751386-chr3-Intron-DEL-AG-AG--	0.00112426	CBLB	64765686-64765687-chr11-3'UTR-DEL-CA-CA--	0.00129437	SF1				KL Synonymous	0.00129902	KL
278	WRN Intron	0.000808678	WRN	CDH1 Non_Silent	0.00114636	CDH1	ESR1 Intron	0.00111881	ESR1	CUL3 UTR	0.00127116	CUL3				RET Synonymous	0.00129902	RET
279	NCOR1 Intron	0.0008079	NCOR1	50809907-50809909-chr10-In_Frame_Del-DEL-AGC-AGC--	0.00113343	A1CF	PDGFB Intron	0.00111275	PDGFB	CCNB1 UTR	0.00126789	CCNB1				CTNND1 Synonymous	0.00129902	CTNND1
280	3777568-3777568-chr16-Intron-SNP-T-T-G	0.000806975	CREBBP	SETD2 Non_Silent	0.00113341	SETD2	47410088-47410088-chr2-Splice_Region-SNP-A-A-T	0.00111143	MSH2	29942460-29942460-chr6-5'UTR-SNP-C-C-T	0.0012603	HLA-A				100709720-100709720-chr8-Synonymous-SNP-C-C-T	0.00129149	PABPC1
281	41661466-41661466-chr8-Intron-SNP-T-T-G	0.000806793	ANK1	57091663-57091663-chr12-Missense_Mutation-SNP-T-T-C	0.00112914	NAB2	TET1 Intron	0.00111124	TET1	CSMD3 UTR	0.00123778	CSMD3				MYH1 Synonymous	0.00128943	MYH1
282	TSHR Intron	0.000806171	TSHR	MYB Non_Silent	0.00112914	MYB	11230913-11230913-chr1-Intron-SNP-C-C-A	0.00111104	MTOR	FANCF UTR	0.00123428	FANCF				152235880-152235880-chr7-Synonymous-SNP-C-C-T	0.00128632	KMT2C
283	COL1A1 Non_Silent	0.000806014	COL1A1	3728751-3728751-chr16-Missense_Mutation-SNP-G-G-C	0.00112905	CREBBP	140370686-140370687-chr2-Intron-DEL-CA-CA--	0.00111036	LRP1B	ANK1 UTR	0.00123161	ANK1				COL2A1 Synonymous	0.00128615	COL2A1
284	72797459-72797461-chr16-In_Frame_Del-DEL-TTG-TTG--	0.000805569	ZFHX3	1956141-1956141-chr4-Missense_Mutation-SNP-G-G-C	0.00112707	WHSC1	152247896-152247896-chr7-Splice_Region-SNP-C-C-A	0.00110976	KMT2C	29945531-29945532-chr6-3'UTR-INS-----C	0.00122889	HLA-A				BTK Synonymous	0.0012859	BTK
285	POLE Non_Silent	0.000802904	POLE	154400837-154400837-chrX-Missense_Mutation-SNP-C-C-T	0.00112542	RPL10	CNOT3 Intron	0.00110473	CNOT3	AKT2 UTR	0.00122646	AKT2				KAT6A Synonymous	0.00128268	KAT6A
286	SDHA UTR	0.000801872	SDHA	7669659-7669659-chr17-Missense_Mutation-SNP-A-A-G	0.00112542	TP53	AFF4 Intron	0.00110368	AFF4	222201035-222201038-chr2-3'UTR-DEL-ACAC-ACAC--	0.00121931	PAX3				SOX2 Synonymous	0.00128268	SOX2
287	FGFR4 Intron	0.000801753	FGFR4	14158612-14158612-chr3-Missense_Mutation-SNP-A-A-C	0.00112176	XPC	SPECC1 Intron	0.00110289	SPECC1	TRIM24 UTR	0.00121844	TRIM24				50492713-50492713-chr15-Synonymous-SNP-T-T-C	0.00128268	USP8
288	53495166-53495168-chr3-Missense_Mutation-DEL-GAT-GAT--	0.000801489	CACNA1D	MLLT4 Non_Silent	0.00111843	MLLT4	ARHGAP26 Intron	0.00110223	ARHGAP26	DCTN1 UTR	0.00121499	DCTN1				PLCG1 Synonymous	0.00128268	PLCG1
289	PBX1 Intron	0.000801319	PBX1	ARID2 Non_Silent	0.0011158	ARID2	24032681-24032683-chr2-Intron-DEL-AAT-AAT--	0.00110161	C2orf44	DDB2 UTR	0.00121282	DDB2				149009712-149009712-chr1-Synonymous-SNP-A-A-G	0.00127689	PDE4DIP
290	TFG Intron	0.000801246	TFG	PDE4DIP Non_Silent	0.00111248	PDE4DIP	116769622-116769625-chr7-Intron-DEL-TTTT-TTTT--	0.00110096	MET	RMI2 UTR	0.00118992	RMI2				138909084-138909084-chr7-Synonymous-SNP-G-G-A	0.00127104	KIAA1549
291	108663973-108663974-chr6-Frame_Shift_Ins-INS-----G	0.000799764	FOXO3	IL7R Non_Silent	0.0011105	IL7R	PML Intron	0.00109796	PML	AXIN1 UTR	0.00118553	AXIN1				116757685-116757685-chr7-Synonymous-SNP-T-T-G	0.00126602	MET
292	TGFBR2 Non_Silent	0.00079865	TGFBR2	8910499-8910499-chr19-Missense_Mutation-SNP-G-G-C	0.0011105	MUC16	MLLT1 Intron	0.00109429	MLLT1	ASXL2 UTR	0.00118376	ASXL2				CIC Synonymous	0.00126465	CIC
293	APC Intron	0.000798387	APC	RBM10 Non_Silent	0.00110992	RBM10	CACNA1D Intron	0.00109164	CACNA1D	CCR4 UTR	0.00114725	CCR4				SIRPA Synonymous	0.00126001	SIRPA
294	136518645-136518645-chr9-Missense_Mutation-SNP-T-T-G	0.000796034	NOTCH1	132871397-132871397-chr8-Nonsense_Mutation-SNP-C-C-A	0.00110677	TG	KNSTRN Intron	0.00109073	KNSTRN	KMT2C UTR	0.00112844	KMT2C				185473266-185473266-chr3-Synonymous-SNP-T-T-C	0.00125653	MAP3K13
295	25245350-25245350-chr12-Missense_Mutation-SNP-C-C-T	0.000795092	KRAS	100709477-100709477-chr8-Missense_Mutation-SNP-G-G-T	0.00110341	PABPC1	RIN2 Intron	0.00109014	RIN2	BCL9 UTR	0.00112107	BCL9				NUTM2A Synonymous	0.00125233	NUTM2A
296	15937498-15937498-chr1-Missense_Mutation-SNP-A-A-C	0.000793572	SPEN	BCL9 Non_Silent	0.00110294	BCL9	NTRK1 Intron	0.00109	NTRK1	CCND1 UTR	0.00110097	CCND1				KTN1 Synonymous	0.00124809	KTN1
297	LRP1 Non_Silent	0.000793482	LRP1	2926760-2926760-chr7-Missense_Mutation-SNP-A-A-C	0.00110268	CARD11	41739965-41739965-chr15-Intron-SNP-T-T-C	0.00108853	MGA	MLLT6 UTR	0.00109736	MLLT6				NONO Synonymous	0.00123943	NONO
298	GK Intron	0.000792811	GK	FAT3 Non_Silent	0.00110225	FAT3	ASXL1 Intron	0.00108792	ASXL1	26780772-26780773-chr1-3'UTR-INS-----C	0.00109171	ARID1A				HNF1A Synonymous	0.00122741	HNF1A
299	152273673-152273673-chr7-Intron-SNP-G-G-A	0.000791102	KMT2C	ERBB3 Non_Silent	0.00109945	ERBB3	195811631-195811632-chr3-Intron-DEL-TC-TC--	0.00108775	MUC4	XPC UTR	0.00109082	XPC				ZFHX3 Synonymous	0.00122589	ZFHX3
300	66849291-66849291-chr11-Missense_Mutation-SNP-A-A-C	0.000790152	PC	236561-236561-chr5-Missense_Mutation-SNP-G-G-A	0.00109841	SDHA	59814600-59814605-chr10-Intron-DEL-ACACAC-ACACAC--	0.00108677	CCDC6	HIF1A UTR	0.00109011	HIF1A				TP53 Synonymous	0.00122205	TP53
301	MN1 Non_Silent	0.000789849	MN1	28986818-28986818-chr16-Missense_Mutation-SNP-A-A-C	0.00109841	LAT	152273625-152273625-chr7-Intron-SNP-C-C-A	0.00108253	KMT2C	CREB3L2 UTR	0.00108061	CREB3L2				BCORL1 Synonymous	0.00118595	BCORL1
302	HRAS Intron	0.000788835	HRAS	31526181-31526181-chr5-Missense_Mutation-SNP-T-T-C	0.00108955	DROSHA	HLA-A Intron	0.00108131	HLA-A	ZNF521 UTR	0.00106942	ZNF521				PER1 Synonymous	0.00116034	PER1
303	HIF1A Intron	0.00078849	HIF1A	PTPN13 Non_Silent	0.00108813	PTPN13	ANK1 Intron	0.00107818	ANK1	HOXC11 UTR	0.00105902	HOXC11				69879314-69879314-chr3-Synonymous-SNP-A-A-C	0.00115823	MITF
304	33010784-33010784-chr1-3'Flank-SNP-C-C-G	0.000786545	AK2	95480020-95480020-chr9-Missense_Mutation-SNP-T-T-C	0.00108589	PTCH1	CREB3L2 Intron	0.00107697	CREB3L2	CCDC6 UTR	0.0010368	CCDC6				KDM5C Synonymous	0.00115745	KDM5C
305	TF Synonymous	0.000786335	TF	29943463-29943463-chr6-Nonsense_Mutation-SNP-T-T-A	0.00108358	HLA-A	FANCA Intron	0.00107657	FANCA	DCD UTR	0.00103493	DCD				92883335-92883335-chr11-Synonymous-SNP-A-A-C	0.00115627	FAT3
306	152265043-152265043-chr7-Synonymous-SNP-G-G-A	0.000785171	KMT2C	PABPC1 Non_Silent	0.00108337	PABPC1	EED Intron	0.0010763	EED	BTK UTR	0.00102308	BTK				RECQL Synonymous	0.00115244	RECQL
307	207575361-207575361-chr2-Missense_Mutation-SNP-G-G-C	0.000784554	CREB1	HOXC11 Non_Silent	0.00107693	HOXC11	DGCR8 Intron	0.0010753	DGCR8	ERCC5 UTR	0.00101673	ERCC5				RGPD3 Synonymous	0.00114457	RGPD3
308	FKBP9 Intron	0.000784421	FKBP9	29823727-29823727-chr19-Missense_Mutation-SNP-A-A-C	0.00106893	CCNE1	180628858-180628858-chr5-Intron-SNP-T-T-G	0.00107199	FLT4	ABL2 UTR	0.00101236	ABL2				ARHGAP5 Synonymous	0.00114265	ARHGAP5
309	PICALM Intron	0.000784184	PICALM	BCL9L Non_Silent	0.00106386	BCL9L	PTPRB Intron	0.0010694	PTPRB	SFRP4 UTR	0.00101122	SFRP4				CUX1 Synonymous	0.0011408	CUX1
310	BCLAF1 Intron	0.000784175	BCLAF1	CREBBP Non_Silent	0.00106252	CREBBP	F12 Intron	0.00106849	F12	170664089-170664090-chr1-5'UTR-DEL-CT-CT--	0.00100954	PRRX1				41668951-41668951-chr15-Synonymous-SNP-A-A-G	0.00113581	MGA
311	TPR Intron	0.000782653	TPR	PTPRB Non_Silent	0.00106174	PTPRB	POLD1 Intron	0.00106541	POLD1	FOXO4 UTR	0.00100711	FOXO4				42292633-42292633-chr19-Synonymous-SNP-G-G-C	0.00113068	CIC
312	TP63 Non_Silent	0.000782092	TP63	127738434-127738434-chr8-Missense_Mutation-SNP-A-A-C	0.0010594	MYC	66853406-66853406-chr11-Intron-SNP-A-A-G	0.00106379	PC	TRIM3 UTR	0.0010011	TRIM3				COL3A1 Synonymous	0.00112998	COL3A1
313	CREB3L2 Intron	0.000781542	CREB3L2	54290486-54290486-chr4-Nonsense_Mutation-SNP-C-C-A	0.00105733	PDGFRA	SND1 Intron	0.00106	SND1	SDHC UTR	0.000989377	SDHC				SMARCA4 Synonymous	0.00112812	SMARCA4
314	POT1 Intron	0.000779191	POT1	26773691-26773693-chr1-In_Frame_Del-DEL-GCA-GCA--	0.00105701	ARID1A	NUTM2A Intron	0.00105738	NUTM2A	RAD21 UTR	0.000981447	RAD21				DCC Synonymous	0.00110019	DCC
315	MAP3K13 Non_Silent	0.0007791	MAP3K13	SUZ12 Non_Silent	0.00105505	SUZ12	133132070-133132070-chr8-Intron-SNP-A-A-C	0.00105694	TG	100703149-100703150-chr8-3'UTR-INS-----GGG	0.000979669	PABPC1				29944168-29944168-chr6-Synonymous-SNP-G-G-A	0.00109775	HLA-A
316	152248130-152248130-chr7-Synonymous-SNP-T-T-C	0.000777471	KMT2C	7669662-7669662-chr17-Missense_Mutation-SNP-T-T-G	0.00105453	TP53	A1CF Intron	0.00105546	A1CF	SMAD2 UTR	0.000978177	SMAD2				RABEP1 Synonymous	0.00109261	RABEP1
317	EPHA3 Intron	0.000777223	EPHA3	BCOR Non_Silent	0.00105437	BCOR	ALDH2 Intron	0.00105276	ALDH2	29942448-29942448-chr6-5'UTR-SNP-C-C-G	0.000975612	HLA-A				195786603-195786603-chr3-Synonymous-SNP-T-T-G	0.001084	MUC4
318	ZEB1 Non_Silent	0.000776769	ZEB1	CHD7 Non_Silent	0.00105399	CHD7	29944067-29944067-chr6-Intron-SNP-T-T-A	0.00104862	HLA-A	PTEN UTR	0.000974361	PTEN				FCGR2B Synonymous	0.00105414	FCGR2B
319	100706893-100706893-chr8-Missense_Mutation-SNP-G-G-A	0.0007755	PABPC1	56882022-56882027-chr5-In_Frame_Del-DEL-CAACAA-CAACAA--	0.0010539	MAP3K1	157174893-157174893-chr6-Intron-SNP-A-A-C	0.00104666	ARID1B	ABI1 UTR	0.000972394	ABI1				DCTN1 Synonymous	0.00105214	DCTN1
320	TET1 Intron	0.000775438	TET1	CR1 Non_Silent	0.00105264	CR1	MUT Intron	0.00104308	MUT	58891707-58891709-chr20-5'UTR-DEL-CCG-CCG--	0.000968098	GNAS				ZNF19 Synonymous	0.0010393	ZNF19
321	117627845-117627846-chr1-3'UTR-DEL-TG-TG--	0.000772746	FAM46C	CASC5 Non_Silent	0.00105037	CASC5	CREB3L1 Intron	0.00104086	CREB3L1	2514579-2514580-chr4-3'UTR-INS-----CCA	0.000966683	RNF4				F2 Synonymous	0.00103928	F2
322	KIAA1549 Intron	0.000772096	KIAA1549	102404597-102404597-chr10-Missense_Mutation-SNP-T-T-G	0.00105008	PSD	112682713-112682714-chr8-Intron-DEL-AG-AG--	0.00103985	CSMD3	ATRX UTR	0.000959964	ATRX				PREX2 Synonymous	0.0010213	PREX2
323	11350598-11350599-chr16-Intron-DEL-AA-AA--	0.000770196	RMI2	100705027-100705027-chr8-Missense_Mutation-SNP-T-T-A	0.00104982	PABPC1	MED12 Intron	0.00103982	MED12	FAM135B UTR	0.000956384	FAM135B				MLH1 Synonymous	0.00100513	MLH1
324	MSH6 Intron	0.000769452	MSH6	MLLT1 Non_Silent	0.00104621	MLLT1	ZEB1 Intron	0.00103968	ZEB1	CTNND1 UTR	0.000953522	CTNND1				PPP2R1A Synonymous	0.00100176	PPP2R1A
325	FLT3 Non_Silent	0.00076766	FLT3	POLG Non_Silent	0.00103106	POLG	29942714-29942714-chr6-Intron-SNP-C-C-A	0.0010368	HLA-A	CCNE1 UTR	0.000950983	CCNE1				POLQ Synonymous	0.000999402	POLQ
326	ZEB1 Intron	0.000766917	ZEB1	FCGR2B Non_Silent	0.00102919	FCGR2B	LRIG3 Intron	0.00103589	LRIG3	WWP2 UTR	0.000939676	WWP2				ROS1 Synonymous	0.000995191	ROS1
327	TMEM127 Non_Silent	0.000766896	TMEM127	NSD1 Non_Silent	0.00102872	NSD1	FGFR1OP Intron	0.00103589	FGFR1OP	RNF4 UTR	0.000933271	RNF4				150813259-150813259-chr1-Synonymous-SNP-G-G-C	0.000987142	ARNT
328	BRD3 Non_Silent	0.000766824	BRD3	41933693-41933693-chr8-Nonsense_Mutation-SNP-G-G-T	0.00102867	KAT6A	RSPO2 Intron	0.00103401	RSPO2	100703212-100703212-chr8-3'UTR-SNP-G-G-T	0.000928597	PABPC1				BCL6 Synonymous	0.000986791	BCL6
329	49027194-49027194-chr12-Synonymous-SNP-A-A-G	0.000766246	KMT2D	NBEA Non_Silent	0.00102391	NBEA	AKT1 Intron	0.00103035	AKT1	118898318-118898318-chr11-3'UTR-SNP-A-A-C	0.000923743	BCL9L				WRN Synonymous	0.000977344	WRN
330	EXT2 Intron	0.000765704	EXT2	10902097-10902097-chr16-Missense_Mutation-SNP-A-A-C	0.00101977	CIITA	HSP90AA1 Intron	0.00102894	HSP90AA1	CALR UTR	0.000918421	CALR				152265091-152265091-chr7-Synonymous-SNP-T-T-A	0.000973044	KMT2C
331	BUB1B Intron	0.000764619	BUB1B	72797459-72797461-chr16-In_Frame_Del-DEL-TTG-TTG--	0.00101859	ZFHX3	AIP Intron	0.00102745	AIP	LPP UTR	0.000917451	LPP				48685974-48685974-chrX-Synonymous-SNP-A-A-C	0.000969283	WAS
332	77922179-77922179-chr9-Nonsense_Mutation-SNP-G-G-T	0.000764029	GNAQ	29942916-29942916-chr6-Missense_Mutation-SNP-A-A-G	0.00101841	HLA-A	8876673-8876674-chr19-Intron-DEL-AG-AG--	0.00102706	MUC16	RCC2 UTR	0.000916326	RCC2				3771839-3771839-chr11-Synonymous-SNP-A-A-G	0.000967523	NUP98
333	GNA11 Intron	0.0007631	GNA11	208248388-208248388-chr2-Missense_Mutation-SNP-C-C-T	0.0010128	IDH1	57200834-57200834-chr12-Intron-SNP-A-A-C	0.00102706	LRP1	65739899-65739899-chrX-3'UTR-SNP-A-A-C	0.000913933	MSN				SF3B1 Synonymous	0.000957017	SF3B1
334	NUP98 Non_Silent	0.000760062	NUP98	102084824-102084826-chr14-In_Frame_Del-DEL-TCT-TCT--	0.00101238	HSP90AA1	NUP98 Intron	0.00102677	NUP98	RAC1 UTR	0.000912229	RAC1				8886745-8886745-chr19-Synonymous-SNP-A-A-C	0.000956801	MUC16
335	STK11 Intron	0.000756647	STK11	71140798-71140800-chrX-In_Frame_Del-DEL-CAG-CAG--	0.00101184	MED12	CDH17 Intron	0.00102615	CDH17	TLX1 UTR	0.000909552	TLX1				NBEA Synonymous	0.000954247	NBEA
336	KEAP1 Non_Silent	0.000756524	KEAP1	FIP1L1 Non_Silent	0.00101171	FIP1L1	61780729-61780731-chr17-Intron-DEL-AAC-AAC--	0.00102432	BRIP1	MYO5A UTR	0.000908671	MYO5A				ELN Synonymous	0.000942862	ELN
337	MECOM Intron	0.000756324	MECOM	57128971-57128971-chr12-Missense_Mutation-SNP-A-A-C	0.00101031	LRP1	WAS Intron	0.00102287	WAS	CRTC1 UTR	0.00088105	CRTC1				73981273-73981273-chr4-Synonymous-SNP-T-T-C	0.000931082	PF4
338	100705591-100705591-chr8-Missense_Mutation-SNP-A-A-G	0.000755728	PABPC1	TERT Non_Silent	0.00100634	TERT	5130513-5130513-chr17-Intron-SNP-G-G-C	0.00101982	USP6	NF1 UTR	0.000862691	NF1				AXIN2 Synonymous	0.000930907	AXIN2
339	NSD1 Intron	0.000754403	NSD1	NR4A3 Non_Silent	0.00100285	NR4A3	102572959-102572959-chr10-Intron-SNP-A-A-G	0.00101816	SUFU	REL UTR	0.000854425	REL				FCRL4 Synonymous	0.000923853	FCRL4
340	NOTCH1 Non_Silent	0.000753199	NOTCH1	37907548-37907548-chr7-Missense_Mutation-SNP-T-T-G	0.00100083	SFRP4	SDHA Intron	0.00101664	SDHA	117799568-117799569-chr8-3'UTR-DEL-TT-TT--	0.000851091	EXT1				195781044-195781044-chr3-Synonymous-SNP-T-T-C	0.000921718	MUC4
341	CRTC3 Intron	0.000749704	CRTC3	MLLT6 Non_Silent	0.000998945	MLLT6	124327645-124327648-chr12-Intron-DEL-AGAC-AGAC--	0.00101525	NCOR2	AR UTR	0.000850399	AR				195784041-195784041-chr3-Synonymous-SNP-T-T-A	0.000916117	MUC4
342	148147640-148147640-chr7-Missense_Mutation-SNP-C-C-A	0.000749401	CNTNAP2	RLF Non_Silent	0.000998472	RLF	CCNC Intron	0.0010148	CCNC	118898323-118898323-chr11-3'UTR-SNP-G-G-C	0.000849098	BCL9L				ABL2 Synonymous	0.000909778	ABL2
343	DGCR8 Intron	0.000748014	DGCR8	NIN Non_Silent	0.00099731	NIN	47994485-47994486-chr12-Splice_Region-DEL-GA-GA--	0.00100997	COL2A1	120069427-120069429-chr1-5'UTR-DEL-CCG-CCG--	0.000837509	NOTCH2				CDC6 Synonymous	0.000909267	CDC6
344	NSD1 Non_Silent	0.000747948	NSD1	47171187-47171189-chrX-In_Frame_Del-DEL-GAG-GAG--	0.000995153	RBM10	16108998-16108999-chr17-Intron-DEL-CA-CA--	0.00100997	NCOR1	MYH9 UTR	0.000819447	MYH9				PC Synonymous	0.000908809	PC
345	FNBP1 Non_Silent	0.000746076	FNBP1	SRGAP3 Non_Silent	0.000989566	SRGAP3	TCF7L2 Intron	0.0010097	TCF7L2	PDE4D UTR	0.000818395	PDE4D				WNK2 Synonymous	0.000907161	WNK2
346	56882022-56882027-chr5-In_Frame_Del-DEL-CAACAA-CAACAA--	0.000745905	MAP3K1	SI Non_Silent	0.000988486	SI	1278442-1278443-chr5-Intron-DEL-CA-CA--	0.00100951	TERT	40981667-40981669-chr5-3'UTR-DEL-CTT-CTT--	0.000810934	C7				FAM131B Synonymous	0.000904299	FAM131B
347	195785775-195785775-chr3-Synonymous-SNP-C-C-G	0.000743139	MUC4	8955464-8955464-chr19-Missense_Mutation-SNP-T-T-G	0.000978168	MUC16	FBXO11 Intron	0.00100906	FBXO11	MLH1 UTR	0.000808494	MLH1				169116564-169116564-chr3-Synonymous-SNP-A-A-C	0.000902931	MECOM
348	NUP98 Intron	0.000742818	NUP98	ARNT Non_Silent	0.000972617	ARNT	102572972-102572972-chr10-Intron-SNP-C-C-G	0.00100886	SUFU	MNX1 UTR	0.000807948	MNX1				CSF1R Synonymous	0.000902639	CSF1R
349	100709705-100709705-chr8-Frame_Shift_Del-DEL-T-T--	0.000738421	PABPC1	WWTR1 Non_Silent	0.000968669	WWTR1	PPARG Intron	0.00100808	PPARG	CDH11 UTR	0.000798426	CDH11				PDGFRA Synonymous	0.000901161	PDGFRA
350	23318581-23318581-chr22-3'Flank-SNP-C-C-T	0.000737162	BCR	162776162-162776162-chr1-Missense_Mutation-SNP-C-C-A	0.000967221	DDR2	32035791-32035792-chr10-Intron-DEL-TC-TC--	0.00100601	KIF5B	SPOP UTR	0.000798233	SPOP				HSP90AB1 Synonymous	0.000899578	HSP90AB1
351	CHD7 Non_Silent	0.000735731	CHD7	ROS1 Non_Silent	0.00096571	ROS1	224541-224541-chr5-Intron-SNP-C-C-T	0.0010037	SDHA	ACVR2A UTR	0.000795916	ACVR2A				ERCC4 Synonymous	0.000899042	ERCC4
352	5130513-5130513-chr17-Intron-SNP-G-G-C	0.000734431	USP6	CNTRL Non_Silent	0.000963586	CNTRL	PPFIBP1 Intron	0.00100307	PPFIBP1	DDX3X UTR	0.000792943	DDX3X				MYOD1 Synonymous	0.000898286	MYOD1
353	29222479-29222479-chr2-Intron-SNP-C-C-A	0.000733916	ALK	C3 Non_Silent	0.000963503	C3	NTHL1 Intron	0.00100188	NTHL1	BRD3 UTR	0.00078213	BRD3				BRCA1 Synonymous	0.000897027	BRCA1
354	FAM47C Non_Silent	0.000731787	FAM47C	72788110-72788112-chr16-In_Frame_Del-DEL-TGC-TGC--	0.000961866	ZFHX3	41940656-41940657-chr8-Intron-DEL-AC-AC--	0.00100106	KAT6A	MYOD1 UTR	0.00078213	MYOD1				TNK1 Synonymous	0.000891443	TNK1
355	FLNA Intron	0.000731455	FLNA	CDH11 Non_Silent	0.000960946	CDH11	WHSC1L1 Intron	0.000997884	WHSC1L1	CDK6 UTR	0.00078213	CDK6				8886796-8886796-chr19-Synonymous-SNP-C-C-T	0.000891393	MUC16
356	RBM10 Non_Silent	0.000730147	RBM10	EGF Non_Silent	0.00095839	EGF	79909568-79909569-chr2-Intron-DEL-TG-TG--	0.0009977	CTNNA2	BCL7A UTR	0.00078213	BCL7A				STAT6 Synonymous	0.000886214	STAT6
357	TRIM24 Intron	0.000728922	TRIM24	35824131-35824135-chr17-Frame_Shift_Del-DEL-TCACA-TCACA--	0.000955801	TAF15	POLE Intron	0.00099541	POLE	LMO1 UTR	0.00078213	LMO1				AKT2 Synonymous	0.000875698	AKT2
358	ALK Non_Silent	0.000725835	ALK	ASXL2 Non_Silent	0.000955709	ASXL2	CDH10 Intron	0.000994556	CDH10	KDR UTR	0.00078213	KDR				44952880-44952880-chr18-Synonymous-SNP-C-C-A	0.000875644	SETBP1
359	24032681-24032683-chr2-Intron-DEL-AAT-AAT--	0.000725767	C2orf44	100709671-100709671-chr8-Nonsense_Mutation-SNP-C-C-A	0.000954782	PABPC1	MGA Intron	0.000990962	MGA	ELF4 UTR	0.00078213	ELF4				195786549-195786549-chr3-Synonymous-SNP-G-G-A	0.000870487	MUC4
360	WNK2 Intron	0.000725169	WNK2	OXR1 Non_Silent	0.000945079	OXR1	STAG1 Intron	0.000988774	STAG1	100702998-100703002-chr8-3'UTR-DEL-AAAAC-AAAAC--	0.00078213	PABPC1				FANCD2 Synonymous	0.000869011	FANCD2
361	157587250-157587250-chr1-Intron-SNP-A-A-G	0.000724887	FCRL4	PRF1 Non_Silent	0.000944303	PRF1	2945756-2945759-chr7-Intron-DEL-ACAC-ACAC--	0.000988678	CARD11	PAX8 UTR	0.00078213	PAX8				NTRK1 Synonymous	0.000866181	NTRK1
362	204537760-204537761-chr1-Intron-DEL-TG-TG--	0.00072294	MDM4	152235860-152235860-chr7-Missense_Mutation-SNP-C-C-T	0.00094238	KMT2C	RABEP1 Intron	0.000987961	RABEP1	PLCG1 UTR	0.00078213	PLCG1				ELL Synonymous	0.000839925	ELL
363	MSI2 Intron	0.000722806	MSI2	21974721-21974721-chr9-Missense_Mutation-SNP-G-G-C	0.000941502	CDKN2A	55152710-55152710-chr7-Intron-SNP-A-A-C	0.000986468	EGFR	8683712-8683714-chr2-3'UTR-DEL-ACA-ACA--	0.00078213	ID2				44253556-44253556-chr6-Synonymous-SNP-C-C-T	0.000837153	HSP90AB1
364	NF1 UTR	0.000722729	NF1	BLM Non_Silent	0.000939184	BLM	DDX1 Intron	0.000980762	DDX1	EBP UTR	0.00078213	EBP				ZNF521 Synonymous	0.000835084	ZNF521
365	KEAP1 Intron	0.00072263	KEAP1	CDK12 Non_Silent	0.000938011	CDK12	TRIM27 Intron	0.000976937	TRIM27	IKZF1 UTR	0.00078213	IKZF1				132886929-132886929-chr8-Synonymous-SNP-C-C-A	0.000834947	TG
366	PDGFRA Intron	0.000722623	PDGFRA	NCOR2 Non_Silent	0.000934775	NCOR2	131990830-131990831-chr5-Intron-DEL-CC-CC--	0.000975787	ACSL6	142130807-142130807-chr2-5'UTR-SNP-G-G-C	0.00078213	LRP1B				31183898-31183898-chr16-Synonymous-SNP-G-G-C	0.000828608	FUS
367	MYO5A Non_Silent	0.000722568	MYO5A	11128098-11128098-chr1-Missense_Mutation-SNP-G-G-A	0.000931946	MTOR	AXIN2 Intron	0.000975396	AXIN2	OMD UTR	0.00078213	OMD				CHD7 Synonymous	0.000808551	CHD7
368	99828334-99828336-chr9-In_Frame_Del-DEL-CAC-CAC--	0.000722204	NR4A3	BRD4 Non_Silent	0.00093172	BRD4	HNRNPA2B1 Intron	0.000974769	HNRNPA2B1	DEK UTR	0.00078213	DEK				186708937-186708937-chr4-Synonymous-SNP-A-A-C	0.000797814	FAT1
369	STAG2 Non_Silent	0.000721944	STAG2	47803500-47803501-chr2-Frame_Shift_Ins-INS-----C	0.000931171	MSH6	177090099-177090100-chr5-Intron-DEL-TG-TG--	0.000973149	FGFR4	SMARCA4 UTR	0.00078213	SMARCA4				100715538-100715538-chr8-Synonymous-SNP-T-T-C	0.000797176	PABPC1
370	HSP90AB1 UTR	0.000721889	HSP90AB1	100715564-100715564-chr8-Missense_Mutation-SNP-C-C-T	0.000930559	PABPC1	CUX1 Intron	0.00097296	CUX1	TFE3 UTR	0.00078213	TFE3				TAF1 Synonymous	0.00078286	TAF1
371	41143014-41143015-chr5-Splice_Region-DEL-GA-GA--	0.000721491	C6	132643513-132643514-chr12-Frame_Shift_Del-DEL-CA-CA--	0.000930145	POLE	28887409-28887410-chr22-Intron-DEL-AG-AG--	0.000964283	ZNRF3	CREB3L1 UTR	0.00078213	CREB3L1				TRIM2 Synonymous	0.000778915	TRIM2
372	MITF Non_Silent	0.000720053	MITF	TAF15 Non_Silent	0.000929981	TAF15	2303242-2303242-chr1-Intron-SNP-G-G-T	0.000962064	SKI	PHF6 UTR	0.00078213	PHF6				AXIN1 Synonymous	0.000769948	AXIN1
373	FCGR2B Intron	0.000719192	FCGR2B	NUP214 Non_Silent	0.000929973	NUP214	MAP2K2 Intron	0.000961437	MAP2K2	PREX2 UTR	0.00078213	PREX2				CCDC6 Synonymous	0.000767447	CCDC6
374	38482010-38482010-chr5-Missense_Mutation-SNP-T-T-G	0.000718975	LIFR	AMT Non_Silent	0.000929871	AMT	MDM2 Intron	0.000957806	MDM2	CTNND2 UTR	0.00078213	CTNND2				ACVR2A Synonymous	0.000764392	ACVR2A
375	187733660-187733660-chr3-Missense_Mutation-SNP-T-T-G	0.00071896	BCL6	TSC1 Non_Silent	0.000929116	TSC1	NSD1 Intron	0.000955733	NSD1	130057407-130057408-chrX-3'UTR-DEL-GA-GA--	0.00078213	BCORL1				NUP214 Synonymous	0.000751246	NUP214
376	66850937-66850938-chr11-Intron-DEL-GA-GA--	0.000718503	PC	C7 Non_Silent	0.000925926	C7	RUNX1T1 Intron	0.000953917	RUNX1T1	GK UTR	0.00078213	GK				ZBTB16 Synonymous	0.000744058	ZBTB16
377	15931542-15931542-chr1-Missense_Mutation-SNP-G-G-A	0.0007184	SPEN	COL1A1 Non_Silent	0.000922828	COL1A1	193142099-193142100-chr1-Intron-DEL-GA-GA--	0.000953717	CDC73	MAL UTR	0.000753878	MAL				SPECC1 Synonymous	0.000736583	SPECC1
378	FAT3 Non_Silent	0.000718344	FAT3	47171162-47171164-chrX-In_Frame_Del-DEL-GGA-GGA--	0.000921095	RBM10	225395-225395-chr5-Intron-SNP-G-G-T	0.000951881	SDHA	MAP2 UTR	0.0007523	MAP2				FLNA Synonymous	0.000723139	FLNA
379	8900802-8900802-chr19-Missense_Mutation-SNP-C-C-G	0.000718247	MUC16	APOBEC3B Non_Silent	0.000919592	APOBEC3B	IST1 Intron	0.000951395	IST1	HNF1A UTR	0.000742273	HNF1A				1915109-1915109-chr20-Synonymous-SNP-T-T-G	0.00071974	SIRPA
380	ATP2B3 Intron	0.000717982	ATP2B3	115086891-115086891-chr9-Missense_Mutation-SNP-G-G-T	0.000918914	TNC	TFRC Intron	0.000951105	TFRC	CDKN1B UTR	0.000740113	CDKN1B				PSD Synonymous	0.00071719	PSD
381	TEC Intron	0.000717882	TEC	RNF213 Non_Silent	0.000918389	RNF213	50822111-50822111-chr14-Intron-SNP-G-G-C	0.000950843	NIN	CSF1 UTR	0.000736292	CSF1				TBP Synonymous	0.000711653	TBP
382	CHST11 Intron	0.000716007	CHST11	FGFR3 Non_Silent	0.000918325	FGFR3	MUC16 Intron	0.000943726	MUC16	41688984-41688986-chr17-5'UTR-DEL-CCG-CCG--	0.000726887	EIF1				152248082-152248082-chr7-Synonymous-SNP-G-G-T	0.000697522	KMT2C
383	TH Intron	0.000714378	TH	147486029-147486029-chr7-Missense_Mutation-SNP-A-A-C	0.000915357	CNTNAP2	OTC Intron	0.000942042	OTC	BUB1 UTR	0.000726887	BUB1				134050425-134050425-chr9-Synonymous-SNP-A-A-G	0.000689695	BRD3
384	KIAA1549 Non_Silent	0.000714306	KIAA1549	SMC1A Non_Silent	0.000914679	SMC1A	77320210-77320212-chr17-Intron-DEL-GAG-GAG--	0.000933245	SEPT9	MN1 UTR	0.000726887	MN1				29050422-29050422-chr22-Synonymous-SNP-T-T-G	0.000687965	ZNRF3
385	15937835-15937835-chr1-Synonymous-SNP-C-C-G	0.000713337	SPEN	140868259-140868259-chr2-Missense_Mutation-SNP-G-G-A	0.0009145	LRP1B	161673254-161673254-chr1-Intron-SNP-A-A-G	0.000929942	FCGR2B	SS18L1 UTR	0.000726887	SS18L1				FLT3 Synonymous	0.000687965	FLT3
386	68525838-68525838-chr17-Missense_Mutation-SNP-G-G-C	0.000713335	PRKAR1A	75022148-75022150-chr10-In_Frame_Del-DEL-GAA-GAA--	0.000909475	KAT6B	EZH2 Intron	0.000928353	EZH2	108665138-108665140-chr11-5'UTR-DEL-CGC-CGC--	0.000726887	DDX10				32340031-32340031-chr13-Synonymous-SNP-T-T-G	0.000687965	BRCA2
387	195786343-195786343-chr3-Missense_Mutation-SNP-A-A-G	0.000712577	MUC4	100721442-100721442-chr8-Missense_Mutation-SNP-T-T-G	0.000908428	PABPC1	PIK3CB Intron	0.000927267	PIK3CB	31375013-31375014-chr17-3'UTR-DEL-TA-TA--	0.000726887	NF1				NRG1 Synonymous	0.000687965	NRG1
388	HIP1 Intron	0.000712121	HIP1	PER1 Non_Silent	0.000907764	PER1	IL6ST Intron	0.000923253	IL6ST	HOXA9 UTR	0.000726887	HOXA9				ARHGAP26 Synonymous	0.000687965	ARHGAP26
389	PTK6 Intron	0.000711632	PTK6	138694867-138694868-chr3-Frame_Shift_Ins-INS-----G	0.000907506	PIK3CB	13988243-13988244-chr7-Intron-DEL-CA-CA--	0.000921082	ETV1	BRD4 UTR	0.000726887	BRD4				195786231-195786231-chr3-Synonymous-SNP-A-A-G	0.000687965	MUC4
390	TRIP11 Non_Silent	0.000711614	TRIP11	152265209-152265209-chr7-Missense_Mutation-SNP-G-G-A	0.000906404	KMT2C	SRGAP3 Intron	0.00091853	SRGAP3	CDX2 UTR	0.000726887	CDX2				37907554-37907554-chr7-Synonymous-SNP-A-A-G	0.000687965	SFRP4
391	CTNND1 Non_Silent	0.000711191	CTNND1	138567611-138567611-chr7-Missense_Mutation-SNP-A-A-C	0.000905219	TRIM24	74057710-74057710-chr7-Intron-SNP-A-A-C	0.000911883	ELN	58974631-58974633-chr5-3'UTR-DEL-AAA-AAA--	0.000726887	PDE4D				236502-236502-chr5-Synonymous-SNP-G-G-T	0.000687965	SDHA
392	SET Intron	0.000710722	SET	ZCCHC8 Non_Silent	0.000903079	ZCCHC8	140734812-140734814-chr7-Intron-DEL-AAG-AAG--	0.000911818	BRAF	15510255-15510288-chr9-5'UTR-DEL-GCGGGCGGCGGACGCGGGCCCAGCTACCGGGCCC-GCGGGCGGCGGACGCGGGCCCAGCTACCGGGCCC--	0.000726887	PSIP1				195785376-195785376-chr3-Synonymous-SNP-A-A-G	0.000687965	MUC4
393	CD209 Intron	0.000709402	CD209	ABL2 Non_Silent	0.000901818	ABL2	149030031-149030031-chr1-Intron-SNP-T-T-G	0.000907286	PDE4DIP	108680665-108680665-chr6-3'UTR-SNP-T-T-A	0.000726887	FOXO3				CBLB Synonymous	0.000687965	CBLB
394	29197730-29197731-chr2-Intron-DEL-CA-CA--	0.000706929	ALK	ETV4 Non_Silent	0.000900327	ETV4	15264811-15264811-chr19-Intron-SNP-C-C-G	0.000905204	BRD4	GPHN UTR	0.000726887	GPHN				109969024-109969024-chr4-Synonymous-SNP-T-T-G	0.000687965	EGF
395	26780673-26780673-chr1-Missense_Mutation-SNP-T-T-G	0.000706825	ARID1A	6222261-6222263-chr19-In_Frame_Del-DEL-AGG-AGG--	0.000900117	MLLT1	AFF1 Intron	0.000903338	AFF1	KAT7 UTR	0.000726887	KAT7				ERCC2 Synonymous	0.000687965	ERCC2
396	15876576-15876576-chr1-Missense_Mutation-SNP-G-G-A	0.000703953	SPEN	138250994-138250994-chr8-Missense_Mutation-SNP-G-G-C	0.000897142	FAM135B	HR Intron	0.00090241	HR	44253745-44253745-chr6-3'UTR-SNP-T-T-G	0.000726887	HSP90AB1				ATP1A1 Synonymous	0.000687965	ATP1A1
397	MYB Intron	0.000702745	MYB	152187364-152187364-chr7-Missense_Mutation-SNP-T-T-G	0.000895878	KMT2C	CNBD1 Intron	0.000891991	CNBD1	2596250-2596250-chr4-3'UTR-SNP-A-A-C	0.000726887	RNF4				RECQL4 Synonymous	0.000687965	RECQL4
398	AFF3 Non_Silent	0.000700388	AFF3	119915595-119915595-chr1-Missense_Mutation-SNP-A-A-G	0.000895161	NOTCH2	YWHAE Intron	0.000890235	YWHAE	PPFIBP1 UTR	0.000726887	PPFIBP1				GNA11 Synonymous	0.000687965	GNA11
399	FAT1 Intron	0.000699172	FAT1	100709499-100709499-chr8-Missense_Mutation-SNP-G-G-A	0.000893934	PABPC1	75556687-75556688-chr7-Intron-DEL-AA-AA--	0.000884272	HIP1	ARHGAP26 UTR	0.000726887	ARHGAP26				140335650-140335650-chr2-Synonymous-SNP-T-T-C	0.000687965	LRP1B
400	57178583-57178583-chr12-Missense_Mutation-SNP-A-A-C	0.000698618	LRP1	108663973-108663974-chr6-Frame_Shift_Ins-INS-----G	0.000888149	FOXO3	18747130-18747130-chr19-Intron-DEL-C-C--	0.00088421	CRTC1	40356682-40356682-chr17-3'UTR-SNP-T-T-G	0.000726887	RARA				102085912-102085912-chr14-Synonymous-SNP-A-A-C	0.000687965	HSP90AA1
401	CIC Non_Silent	0.000696981	CIC	FLT3 Non_Silent	0.000887932	FLT3	KDR Intron	0.000882774	KDR	CS UTR	0.000726887	CS				104757545-104757545-chr12-Synonymous-SNP-T-T-C	0.000687965	CHST11
402	10064460-10064460-chr3-Intron-SNP-C-C-T	0.000696634	FANCD2	6667904-6667909-chr12-In_Frame_Del-DEL-TGCTGC-TGCTGC--	0.000887209	ZNF384	MAP3K1 Intron	0.000882457	MAP3K1	CREBBP UTR	0.000721185	CREBBP				131197223-131197223-chr9-Synonymous-SNP-A-A-C	0.000687965	NUP214
403	152248082-152248082-chr7-Synonymous-SNP-G-G-T	0.000695711	KMT2C	ATP1A1 Non_Silent	0.000886233	ATP1A1	RBM10 Intron	0.000882154	RBM10	2514476-2514476-chr4-3'UTR-SNP-A-A-C	0.000721185	RNF4				PDE4D Synonymous	0.000687965	PDE4D
404	AK2 Flank	0.000695229	AK2	45650580-45650580-chr11-Missense_Mutation-SNP-A-A-C	0.00088104	CHST1	TERT Intron	0.000881811	TERT	XPA UTR	0.000721185	XPA				41178473-41178473-chr22-Synonymous-SNP-T-T-G	0.000687965	EP300
405	116401160-116401160-chr1-Missense_Mutation-SNP-A-A-C	0.00069333	ATP1A1	STAT6 Non_Silent	0.000880733	STAT6	JAK2 Intron	0.000881467	JAK2	CNTNAP2 UTR	0.000721185	CNTNAP2				87232844-87232844-chr10-Synonymous-SNP-C-C-T	0.000687965	NUTM2A
406	23836353-23836354-chr16-Splice_Region-DEL-GC-GC--	0.000691713	PRKCB	161672984-161672984-chr1-Missense_Mutation-SNP-T-T-G	0.000879377	FCGR2B	CREBBP Intron	0.000879215	CREBBP	LHFP UTR	0.000721185	LHFP				ACKR3 Synonymous	0.000687965	ACKR3
407	2945728-2945733-chr7-Intron-DEL-ACACAC-ACACAC--	0.000691442	CARD11	26192530-26192530-chr7-Missense_Mutation-SNP-T-T-C	0.000875236	HNRNPA2B1	29943718-29943718-chr6-Intron-SNP-G-G-A	0.000879152	HLA-A	KMT2A UTR	0.000721185	KMT2A				HSP90AA1 Synonymous	0.000687965	HSP90AA1
408	27181706-27181707-chr7-3'UTR-DEL-AT-AT--	0.000691231	HOXA11	26779620-26779620-chr1-Missense_Mutation-SNP-A-A-C	0.000871627	ARID1A	FOXO3 Intron	0.000876937	FOXO3	RALGDS UTR	0.000721185	RALGDS				40073573-40073573-chrX-Synonymous-SNP-T-T-G	0.000687965	BCOR
409	GAS7 Intron	0.000689481	GAS7	188609331-188609331-chr3-Missense_Mutation-SNP-A-A-C	0.000866644	LPP	CLTC Intron	0.00087646	CLTC	CDKN2A UTR	0.000721185	CDKN2A				DDX10 Synonymous	0.000687965	DDX10
410	17841830-17841830-chr19-Intron-SNP-A-A-C	0.00068886	JAK3	14178466-14178468-chr3-In_Frame_Del-DEL-CCT-CCT--	0.000866276	XPC	31181787-31181787-chr17-Splice_Site-SNP-T-T-G	0.000872744	NF1	158766846-158766847-chr6-3'UTR-DEL-AC-AC--	0.000721185	EZR				ZRSR2 Synonymous	0.000676867	ZRSR2
411	33320121-33320123-chr6-In_Frame_Del-DEL-TCC-TCC--	0.000686895	DAXX	10825121-10825121-chr19-Missense_Mutation-SNP-T-T-G	0.000864908	DNM2	MYH9 Intron	0.0008724	MYH9	ETV1 UTR	0.000721185	ETV1				CDH1 Synonymous	0.000676867	CDH1
412	162780066-162780067-chr1-Intron-DEL-TC-TC--	0.000686795	DDR2	108688937-108688937-chr11-Missense_Mutation-SNP-A-A-C	0.000863829	DDX10	ARID1A Intron	0.00087143	ARID1A	C6 UTR	0.000721185	C6				EPS15 Synonymous	0.000676867	EPS15
413	BLM Intron	0.000686497	BLM	94468827-94468827-chr13-Missense_Mutation-SNP-T-T-G	0.000862534	DCT	CARD11 Intron	0.000869724	CARD11	MET UTR	0.000721185	MET				57091656-57091656-chr12-Synonymous-SNP-G-G-C	0.000676867	NAB2
414	20136232-20136233-chrX-Intron-DEL-CA-CA--	0.000685879	EIF1AX	195785780-195785780-chr3-Missense_Mutation-SNP-T-T-C	0.000861968	MUC4	180620740-180620741-chr5-Intron-DEL-GT-GT--	0.00086882	FLT4	TNF UTR	0.000721185	TNF				STAT5B Synonymous	0.000676867	STAT5B
415	F2 Intron	0.000685649	F2	61492168-61492168-chr2-Missense_Mutation-SNP-C-C-A	0.000861467	XPO1	152185538-152185539-chr7-Intron-DEL-AG-AG--	0.00086858	KMT2C	78174654-78174654-chr17-3'UTR-SNP-C-C-T	0.000721185	TK1				COL1A1 Synonymous	0.000676867	COL1A1
416	94479275-94479276-chr13-5'UTR-DEL-CT-CT--	0.000684352	DCT	187733660-187733660-chr3-Missense_Mutation-SNP-T-T-G	0.000860524	BCL6	PHF6 Intron	0.000868389	PHF6	KDM5C UTR	0.000721185	KDM5C				LZTR1 Synonymous	0.000676867	LZTR1
417	29268467-29268467-chr22-Intron-SNP-A-A-C	0.000683971	EWSR1	195786309-195786309-chr3-Missense_Mutation-SNP-C-C-G	0.000857685	MUC4	TAT Intron	0.00086814	TAT	CBLB UTR	0.000721185	CBLB				44250040-44250040-chr6-Synonymous-SNP-T-T-G	0.000676867	HSP90AB1
418	CHD4 Intron	0.000680614	CHD4	ESR1 Non_Silent	0.000854585	ESR1	FAT1 Intron	0.000867242	FAT1	TBX3 UTR	0.000721185	TBX3				ARHGEF12 Synonymous	0.000676867	ARHGEF12
419	HSP90AB1 Intron	0.000679938	HSP90AB1	NCOA1 Non_Silent	0.000851111	NCOA1	EPS15 Intron	0.000866499	EPS15	TOP1 UTR	0.000721185	TOP1				NR4A3 Synonymous	0.000676867	NR4A3
420	TGFBR2 Intron	0.000679917	TGFBR2	92102724-92102725-chr7-Frame_Shift_Ins-INS-----G	0.000847943	AKAP9	147899726-147899727-chr2-Intron-INS-----C	0.000865722	ACVR2A	MT2A UTR	0.000721185	MT2A				195788589-195788589-chr3-Synonymous-SNP-A-A-G	0.000676867	MUC4
421	TET2 Intron	0.000679784	TET2	GC Non_Silent	0.000847791	GC	ZNF521 Intron	0.000865542	ZNF521	KEAP1 UTR	0.000721185	KEAP1				71298780-71298780-chrX-Synonymous-SNP-A-A-C	0.000676867	NONO
422	75030842-75030842-chr10-Nonsense_Mutation-SNP-C-C-A	0.000677657	KAT6B	CD74 Non_Silent	0.000844326	CD74	148989525-148989525-chr1-Intron-SNP-T-T-C	0.000865391	PDE4DIP	KLF4 UTR	0.000721185	KLF4				SMC1A Synonymous	0.000676867	SMC1A
423	32974751-32974751-chr7-Missense_Mutation-SNP-A-A-G	0.000676588	FKBP9	KDR Non_Silent	0.000843996	KDR	678021-678021-chr19-Intron-SNP-A-A-C	0.000864447	FSTL3	COA4 UTR	0.000721185	COA4				ESR1 Synonymous	0.000676867	ESR1
424	DEK Non_Silent	0.00067531	DEK	BRCA1 Non_Silent	0.000838722	BRCA1	BMP5 Intron	0.000862188	BMP5	FGFR4 UTR	0.000721185	FGFR4				MED12 Synonymous	0.000676867	MED12
425	RCC2 Intron	0.000675056	RCC2	152238768-152238768-chr7-Missense_Mutation-SNP-T-T-C	0.000836593	KMT2C	FOXO1 Intron	0.000855961	FOXO1	GATA3 UTR	0.000721185	GATA3				BMPR1A Synonymous	0.000676867	BMPR1A
426	MLF1 Intron	0.000674922	MLF1	122361151-122361151-chr12-Missense_Mutation-SNP-C-C-A	0.000835138	CLIP1	MYH1 Intron	0.000854885	MYH1	100703240-100703240-chr8-3'UTR-SNP-T-T-C	0.000721185	PABPC1				108765822-108765822-chr2-Synonymous-SNP-A-A-C	0.000676867	RANBP2
427	ALK Synonymous	0.000672383	ALK	15932115-15932115-chr1-Missense_Mutation-SNP-C-C-G	0.000831104	SPEN	162780066-162780067-chr1-Intron-DEL-TC-TC--	0.000854261	DDR2	100703307-100703307-chr8-3'UTR-SNP-T-T-A	0.000718523	PABPC1				71291927-71291927-chrX-Synonymous-SNP-C-C-G	0.000676867	NONO
428	133985357-133985359-chrX-In_Frame_Del-DEL-CGG-CGG--	0.000670672	GPC3	156880000-156880000-chr1-Missense_Mutation-SNP-T-T-G	0.000828874	NTRK1	CP Intron	0.000853811	CP	LSM1 UTR	0.000718523	LSM1				CNTNAP2 Synonymous	0.000676867	CNTNAP2
429	A1CF Intron	0.000669263	A1CF	CUX1 Non_Silent	0.000826985	CUX1	TMPRSS2 Intron	0.000853337	TMPRSS2	222201320-222201320-chr2-3'UTR-DEL-T-T--	0.000718523	PAX3				CALR Synonymous	0.000676867	CALR
430	AKT3 UTR	0.00066832	AKT3	MLLT3 Non_Silent	0.000824966	MLLT3	UTY Intron	0.000852475	UTY	159099509-159099509-chr5-5'UTR-SNP-T-T-C	0.000718523	EBF1				GC Synonymous	0.000676867	GC
431	7673776-7673776-chr17-Missense_Mutation-SNP-G-G-A	0.000666159	TP53	67545401-67545403-chrX-In_Frame_Del-DEL-GCA-GCA--	0.000823554	AR	NOTCH2 Intron	0.00085238	NOTCH2	26780773-26780773-chr1-3'UTR-DEL-C-C--	0.000718523	ARID1A				152248228-152248228-chr7-Synonymous-SNP-A-A-G	0.000676867	KMT2C
432	ETV1 Intron	0.000666127	ETV1	TSC2 Non_Silent	0.00082131	TSC2	23836353-23836354-chr16-Splice_Region-DEL-GC-GC--	0.00085229	PRKCB	SUFU UTR	0.000718523	SUFU				OXR1 Synonymous	0.000676867	OXR1
433	FIP1L1 Intron	0.000665865	FIP1L1	PLCG1 Non_Silent	0.000820113	PLCG1	GPHN Intron	0.0008504	GPHN	ERBB4 UTR	0.000718523	ERBB4				100713099-100713099-chr8-Synonymous-SNP-T-T-C	0.000676867	PABPC1
434	ATP2B3 Non_Silent	0.00066575	ATP2B3	TAF1 Non_Silent	0.000815727	TAF1	50758357-50758357-chr16-Intron-SNP-C-C-T	0.000850085	CYLD	PCM1 UTR	0.000718523	PCM1				209695122-209695122-chr2-Synonymous-SNP-T-T-G	0.000676867	MAP2
435	157206613-157206613-chr6-Synonymous-SNP-T-T-G	0.000665029	ARID1B	PPM1D Non_Silent	0.000814822	PPM1D	TCEA1 Intron	0.000847455	TCEA1	DNM2 UTR	0.000718523	DNM2				29942845-29942845-chr6-Synonymous-SNP-C-C-T	0.000674124	HLA-A
436	FAT1 Non_Silent	0.000664279	FAT1	RGS7 Non_Silent	0.000814679	RGS7	NPM1 Intron	0.000845308	NPM1	FNBP1 UTR	0.000718523	FNBP1				33013382-33013382-chr1-Synonymous-SNP-G-G-A	0.000665336	AK2
437	IRS4 Non_Silent	0.000664	IRS4	207614451-207614451-chr1-Missense_Mutation-SNP-T-T-C	0.000814564	CR1	121161263-121161263-chr9-Intron-DEL-T-T--	0.000844356	CNTRL	ACKR3 UTR	0.000718523	ACKR3				195786555-195786555-chr3-Synonymous-SNP-G-G-T	0.000660962	MUC4
438	ZNF521 Intron	0.000663396	ZNF521	131127655-131127655-chr9-Missense_Mutation-SNP-G-G-T	0.000812861	NUP214	TRIM2 Intron	0.000843077	TRIM2	DICER1 UTR	0.000718523	DICER1				BRD4 Synonymous	0.000655147	BRD4
439	F5 Intron	0.000661697	F5	100709464-100709464-chr8-Missense_Mutation-SNP-G-G-A	0.000809441	PABPC1	MAP2K1 Intron	0.000840619	MAP2K1	WIF1 UTR	0.000718523	WIF1				195783216-195783216-chr3-Synonymous-SNP-G-G-A	0.000654969	MUC4
440	PDE4D UTR	0.000661002	PDE4D	GPHN Non_Silent	0.000807466	GPHN	6955365-6955365-chr12-Splice_Region-SNP-A-A-C	0.000839033	PTPN6	PRKAR1A UTR	0.000718523	PRKAR1A				FLI1 Synonymous	0.000653916	FLI1
441	MAP2 Intron	0.000659653	MAP2	1915344-1915344-chr20-Missense_Mutation-SNP-G-G-A	0.00080644	SIRPA	FANCC Intron	0.000837351	FANCC	ABL1 UTR	0.000718523	ABL1				RBM10 Synonymous	0.000653916	RBM10
442	BCORL1 Intron	0.000659355	BCORL1	USP8 Non_Silent	0.000804621	USP8	TNFRSF14 Intron	0.000836108	TNFRSF14	CBFB UTR	0.000718523	CBFB				PRKAR1A Synonymous	0.000653916	PRKAR1A
443	117328787-117328787-chr6-Intron-SNP-T-T-G	0.000659294	ROS1	MYC Non_Silent	0.000803456	MYC	PRKAR1A Intron	0.000833526	PRKAR1A	NUP214 UTR	0.000718523	NUP214				TAL1 Synonymous	0.000653916	TAL1
444	MED1 Intron	0.00065799	MED1	106432936-106432936-chr2-Missense_Mutation-SNP-T-T-A	0.00079245	RGPD3	PTPRK Intron	0.000833004	PTPRK	MYCL UTR	0.000718523	MYCL				5135264-5135264-chr17-Synonymous-SNP-C-C-A	0.000653916	USP6
445	ATM Non_Silent	0.000657636	ATM	100706704-100706704-chr8-Missense_Mutation-SNP-C-C-G	0.000788964	PABPC1	43090922-43090923-chr17-Intron-DEL-CA-CA--	0.000832461	BRCA1	MTOR UTR	0.000718523	MTOR				PTPRB Synonymous	0.000653916	PTPRB
446	PBRM1 Intron	0.000655858	PBRM1	21003025-21003025-chr2-Missense_Mutation-SNP-C-C-G	0.000788898	APOB	8896101-8896102-chr19-Intron-INS-----C	0.00083183	MUC16	MGA UTR	0.000718523	MGA				68293360-68293360-chr5-Synonymous-SNP-C-C-T	0.000653916	PIK3R1
447	152235905-152235905-chr7-Missense_Mutation-SNP-C-C-T	0.00065479	KMT2C	SETBP1 Non_Silent	0.000788219	SETBP1	32499524-32499525-chr2-Intron-DEL-TC-TC--	0.000830227	BIRC6	CTNNB1 UTR	0.000718523	CTNNB1				TRIP11 Synonymous	0.000653916	TRIP11
448	108917908-108917910-chr11-In_Frame_Del-DEL-TGA-TGA--	0.00065421	DDX10	41904090-41904090-chr19-Missense_Mutation-SNP-T-T-G	0.000783533	ARHGEF1	ABL1 Intron	0.000828839	ABL1	BCL10 UTR	0.000718523	BCL10				TRIM27 Synonymous	0.000653916	TRIM27
449	27163673-27163673-chr7-Missense_Mutation-SNP-A-A-C	0.000653585	HOXA9	25799435-25799437-chr2-In_Frame_Del-DEL-CTG-CTG--	0.000772608	ASXL2	ELL Intron	0.000825889	ELL	NCOA1 UTR	0.000718523	NCOA1				DDX1 Synonymous	0.000653916	DDX1
450	MSH6 Non_Silent	0.000652694	MSH6	77607886-77607887-chr3-Frame_Shift_Ins-INS-----C	0.000771678	ROBO2	50188800-50188803-chr17-Splice_Region-DEL-AGAG-AGAG--	0.000824165	COL1A1	YOD1 UTR	0.00071312	YOD1				LHFP Synonymous	0.000653916	LHFP
451	AXIN2 Non_Silent	0.000652184	AXIN2	132897254-132897254-chr9-Missense_Mutation-SNP-A-A-C	0.000771678	TSC1	1260400-1260400-chr5-Intron-SNP-G-G-A	0.000823507	TERT	36466194-36466194-chr1-3'UTR-SNP-G-G-C	0.000706199	CSF3R				ATR Synonymous	0.000653916	ATR
452	136275718-136275719-chr6-Intron-DEL-AC-AC--	0.000652146	BCLAF1	92052932-92052932-chr7-Missense_Mutation-SNP-G-G-A	0.000771678	AKAP9	NACA Intron	0.00082232	NACA	POLQ UTR	0.000706199	POLQ				EPHA7 Synonymous	0.000653916	EPHA7
453	SALL4 Non_Silent	0.000651285	SALL4	MB21D2 Non_Silent	0.000771678	MB21D2	WWTR1 Intron	0.000820196	WWTR1	SBDS UTR	0.000706199	SBDS				EXT1 Synonymous	0.000653916	EXT1
454	FUS Intron	0.000651047	FUS	29944193-29944193-chr6-Missense_Mutation-SNP-G-G-A	0.000770968	HLA-A	138737645-138737648-chr3-Intron-DEL-ATAT-ATAT--	0.000819601	PIK3CB	MAP2K4 UTR	0.000706199	MAP2K4				TBL1X Synonymous	0.000653916	TBL1X
455	EXT1 Non_Silent	0.000649754	EXT1	152247975-152247975-chr7-Missense_Mutation-SNP-G-G-A	0.000770563	KMT2C	ARHGEF12 Intron	0.00081755	ARHGEF12	NBN UTR	0.000706199	NBN				RARA Synonymous	0.000653916	RARA
456	PER1 Non_Silent	0.000649754	PER1	205662048-205662048-chr1-Missense_Mutation-SNP-A-A-C	0.000768017	SLC45A3	1803847-1803849-chr4-Intron-DEL-CTG-CTG--	0.000816249	FGFR3	100703049-100703050-chr8-3'UTR-INS-----CCTCT	0.000706199	PABPC1				66991191-66991191-chr7-Synonymous-SNP-G-G-T	0.000653916	SBDS
457	ATP1A1 Non_Silent	0.000649754	ATP1A1	41691092-41691094-chr6-In_Frame_Del-DEL-TGC-TGC--	0.000768017	TFEB	2926832-2926833-chr7-Intron-DEL-GT-GT--	0.000816182	CARD11	6465712-6465712-chr11-5'UTR-SNP-T-T-C	0.000706199	TRIM3				LMNA Synonymous	0.000653916	LMNA
458	1803847-1803849-chr4-Intron-DEL-CTG-CTG--	0.000649754	FGFR3	134053272-134053272-chr9-Missense_Mutation-SNP-T-T-G	0.000767953	BRD3	NAB2 Intron	0.000815915	NAB2	56164321-56164322-chr8-3'UTR-DEL-TG-TG--	0.000706199	PLAG1				PTPRK Synonymous	0.000651306	PTPRK
459	13782254-13782254-chr1-Frame_Shift_Del-DEL-A-A--	0.000649754	PRDM2	SFRP4 Non_Silent	0.00076686	SFRP4	HMGA2 Intron	0.000814186	HMGA2	HOXC13 UTR	0.000706199	HOXC13				29943530-29943530-chr6-Synonymous-SNP-G-G-A	0.000645103	HLA-A
460	40554659-40554659-chr17-3'UTR-SNP-A-A-G	0.000649754	CCR7	RUNX1T1 Non_Silent	0.000766531	RUNX1T1	F5 Intron	0.000813849	F5	54022276-54022277-chr8-5'UTR-INS-----GCG	0.000706199	TCEA1				100712772-100712772-chr8-Synonymous-SNP-G-G-A	0.000645103	PABPC1
461	ANK1 Non_Silent	0.000649745	ANK1	99847525-99847525-chr9-Missense_Mutation-SNP-G-G-C	0.000766508	NR4A3	NUTM1 Intron	0.000813814	NUTM1	MUT UTR	0.000706199	MUT				21491541-21491541-chr12-Synonymous-SNP-T-T-G	0.000645103	RECQL
462	222293706-222293707-chr2-Intron-DEL-CT-CT--	0.000648362	PAX3	68525838-68525838-chr17-Missense_Mutation-SNP-G-G-C	0.000756035	PRKAR1A	86268595-86268600-chr11-Intron-DEL-GTGTGT-GTGTGT--	0.000813695	EED	113166244-113166245-chr10-3'UTR-DEL-AT-AT--	0.000706199	TCF7L2				65534052-65534052-chr17-Synonymous-SNP-A-A-C	0.000645103	AXIN2
463	BCL9L Non_Silent	0.000647872	BCL9L	GATA2 Non_Silent	0.000753034	GATA2	PPP6C Intron	0.000813258	PPP6C	TET1 UTR	0.000706199	TET1				MYH9 Synonymous	0.000645103	MYH9
464	EP300 Intron	0.00064593	EP300	49032947-49032949-chr12-In_Frame_Del-DEL-GCT-GCT--	0.000753034	KMT2D	42320651-42320651-chr8-Intron-SNP-T-T-G	0.000812637	IKBKB	ARHGAP5 UTR	0.000706199	ARHGAP5				ASXL1 Synonymous	0.000645103	ASXL1
465	256458-256458-chr5-3'UTR-SNP-A-A-G	0.000645679	SDHA	50794348-50794348-chr16-Missense_Mutation-SNP-C-C-A	0.000753034	CYLD	8910513-8910513-chr19-Splice_Region-SNP-A-A-G	0.000811889	MUC16	COL1A1 UTR	0.000706199	COL1A1				110008208-110008208-chr4-Synonymous-SNP-T-T-G	0.000645103	EGF
466	DDX6 Intron	0.000644846	DDX6	131197620-131197621-chr9-Frame_Shift_Ins-INS-----C	0.000753034	NUP214	ZBTB16 Intron	0.000811827	ZBTB16	MAP3K13 UTR	0.000706199	MAP3K13				POLD1 Synonymous	0.000645103	POLD1
467	PRPF4 Intron	0.000644064	PRPF4	6697729-6697729-chr19-Missense_Mutation-SNP-G-G-T	0.000753034	C3	FGFR4 Intron	0.000811206	FGFR4	NR4A3 UTR	0.000706199	NR4A3				RIN2 Synonymous	0.000645103	RIN2
468	152235812-152235812-chr7-Splice_Region-SNP-C-C-A	0.000642863	KMT2C	SP8 Non_Silent	0.000753034	SP8	RALGDS Intron	0.000810673	RALGDS	EIF1 UTR	0.000705919	EIF1				NFIB Synonymous	0.000645103	NFIB
469	NCOA1 Non_Silent	0.000642863	NCOA1	STAT5B Non_Silent	0.000753034	STAT5B	SMAD4 Intron	0.000809515	SMAD4	6785518-6785520-chr1-5'UTR-DEL-GAG-GAG--	0.000704961	CAMTA1				CP Synonymous	0.000645103	CP
470	CLIP1 Intron	0.000641799	CLIP1	SMARCD1 Non_Silent	0.000750794	SMARCD1	131150610-131150610-chr9-Splice_Region-SNP-C-C-T	0.000809204	NUP214	100703126-100703126-chr8-3'UTR-SNP-T-T-A	0.000694568	PABPC1				116400922-116400922-chr1-Synonymous-SNP-C-C-T	0.000645103	ATP1A1
471	PRKAR1A Non_Silent	0.000640962	PRKAR1A	152177063-152177063-chr7-Frame_Shift_Del-DEL-T-T--	0.000750794	KMT2C	131986893-131986894-chr5-Intron-DEL-TC-TC--	0.00080861	ACSL6	28180630-28180633-chr7-5'UTR-DEL-GAGG-GAGG--	0.0006587	JAZF1				EBP Synonymous	0.000645103	EBP
472	CD274 Intron	0.000640962	CD274	LRIG3 Non_Silent	0.000750348	LRIG3	STRN Intron	0.00080836	STRN	256509-256509-chr5-3'UTR-SNP-G-G-A	0.00065489	SDHA				PIK3CB Synonymous	0.000645103	PIK3CB
473	CASP8 Non_Silent	0.000640962	CASP8	GOLGA5 Non_Silent	0.000749634	GOLGA5	RHOA Intron	0.000808193	RHOA	29694817-29694817-chr22-3'UTR-SNP-A-A-C	0.00064693	NF2				CD79B Synonymous	0.000645103	CD79B
474	148828714-148828714-chr7-Intron-SNP-C-C-A	0.000640962	EZH2	POT1 Non_Silent	0.000748574	POT1	FAH Intron	0.000806495	FAH	LIF UTR	0.00063374	LIF				TCF3 Synonymous	0.000645103	TCF3
475	90887877-90887877-chr9-Synonymous-SNP-G-G-A	0.000640962	SYK	195786901-195786901-chr3-Missense_Mutation-SNP-G-G-A	0.00074707	MUC4	NDRG1 Intron	0.000805398	NDRG1	ERCC2 UTR	0.000632073	ERCC2				3729776-3729776-chr16-Synonymous-SNP-G-G-C	0.000645103	CREBBP
476	TAF15 Non_Silent	0.000640962	TAF15	TNFAIP3 Non_Silent	0.00074707	TNFAIP3	CARS Intron	0.000805158	CARS	256434-256434-chr5-3'UTR-SNP-G-G-A	0.000614963	SDHA				ELF4 Synonymous	0.000645103	ELF4
477	60788112-60788112-chr10-Missense_Mutation-SNP-T-T-G	0.000640803	CDK1	156134461-156134461-chr1-Missense_Mutation-SNP-T-T-G	0.000746061	LMNA	114398011-114398013-chr1-Intron-DEL-AAA-AAA--	0.000804564	TRIM33	CHD4 UTR	0.000605972	CHD4				57810181-57810181-chr11-Synonymous-SNP-G-G-A	0.000645103	CTNND1
478	163415144-163415146-chr6-5'UTR-DEL-CGG-CGG--	0.000640803	QKI	98976756-98976756-chr7-Missense_Mutation-SNP-A-A-C	0.000745626	TRRAP	129210928-129210928-chr7-Intron-SNP-C-C-G	0.000803837	SMO	SMARCE1 UTR	0.000586955	SMARCE1				OLIG2 Synonymous	0.000645103	OLIG2
479	TP53 Synonymous	0.000640803	TP53	136518759-136518759-chr9-Missense_Mutation-SNP-T-T-G	0.000743511	NOTCH1	BARD1 Intron	0.000803799	BARD1	RGS7 UTR	0.000585564	RGS7				CARD11 Synonymous	0.000645103	CARD11
480	CA2 Intron	0.000640803	CA2	CREB1 Non_Silent	0.00074319	CREB1	124327729-124327731-chr12-Intron-DEL-AGG-AGG--	0.000803472	NCOR2	FOXP1 UTR	0.000574621	FOXP1				AR Synonymous	0.000645103	AR
481	CDC73 Intron	0.000640736	CDC73	ASXL1 Non_Silent	0.000741852	ASXL1	NBEA Intron	0.000802658	NBEA	SPEN UTR	0.000550184	SPEN				PRDM1 Synonymous	0.000645103	PRDM1
482	DNMT3A Intron	0.000640471	DNMT3A	CCND1 Non_Silent	0.000738173	CCND1	MLLT6 Intron	0.000801578	MLLT6	100703321-100703321-chr8-3'UTR-SNP-C-C-T	0.000527582	PABPC1				CDH10 Synonymous	0.000645103	CDH10
483	2080250-2080250-chr16-Synonymous-SNP-A-A-C	0.000639644	TSC2	135192491-135192491-chr6-Missense_Mutation-SNP-T-T-C	0.00073581	MYB	PAFAH1B2 Intron	0.00079992	PAFAH1B2	TRRAP UTR	0.000512113	TRRAP				133753650-133753650-chrX-Synonymous-SNP-A-A-C	0.000637576	GPC3
484	TERT Synonymous	0.000638902	TERT	RBM15 Non_Silent	0.00073581	RBM15	LCP1 Intron	0.000799268	LCP1	PRF1 UTR	0.000508118	PRF1				122361148-122361148-chr12-Synonymous-SNP-G-G-A	0.000637576	CLIP1
485	155192158-155192158-chr1-Missense_Mutation-SNP-A-A-G	0.000638902	MUC1	32953919-32953919-chr3-Missense_Mutation-SNP-T-T-G	0.00073581	CCR4	TCF3 Intron	0.000799119	TCF3	NFATC2 UTR	0.00047586	NFATC2				HIP1 Synonymous	0.000637576	HIP1
486	1807384-1807385-chr4-3'UTR-DEL-TG-TG--	0.000638902	FGFR3	F12 Non_Silent	0.00073581	F12	110008313-110008314-chr4-Intron-DEL-CA-CA--	0.000798735	EGF	MLLT3 UTR	0.000428263	MLLT3				39511604-39511604-chr17-Synonymous-SNP-A-A-C	0.000637576	CDK12
487	42304526-42304526-chr2-Missense_Mutation-SNP-G-G-T	0.000638902	EML4	152411453-152411455-chr4-In_Frame_Del-DEL-CTC-CTC--	0.000732149	FBXW7	8896166-8896166-chr19-Intron-SNP-A-A-G	0.000798021	MUC16	MB21D2 UTR	0.000422818	MB21D2				36473883-36473883-chr1-Synonymous-SNP-A-A-G	0.000637576	CSF3R
488	CTNNA2 Non_Silent	0.000638902	CTNNA2	195786631-195786631-chr3-Missense_Mutation-SNP-T-T-G	0.000732149	MUC4	KAT7 Intron	0.000797075	KAT7	ECT2 UTR	0.000421986	ECT2				FES Synonymous	0.000637576	FES
489	108767711-108767711-chr2-Missense_Mutation-SNP-C-C-G	0.000638902	RANBP2	CNBD1 Non_Silent	0.000732149	CNBD1	FAT3 Intron	0.00079589	FAT3	TF UTR	0.00038608	TF				EPAS1 Synonymous	0.000637576	EPAS1
490	CANT1 UTR	0.000638902	CANT1	186595770-186595770-chr4-Missense_Mutation-SNP-A-A-G	0.000732149	FAT1	152273692-152273692-chr7-Intron-SNP-G-G-A	0.00079498	KMT2C	CDH10 UTR	0.000383451	CDH10				ACSL3 Synonymous	0.000637576	ACSL3
491	SF1 Non_Silent	0.000638902	SF1	15931506-15931506-chr1-Missense_Mutation-SNP-A-A-C	0.000732149	SPEN	DROSHA Intron	0.000793999	DROSHA	PTCH1 UTR	0.000372922	PTCH1				TET2 Synonymous	0.000637576	TET2
492	HLA-A Flank	0.000638902	HLA-A	67835180-67835180-chr14-Missense_Mutation-SNP-G-G-T	0.000732086	RAD51B	10048134-10048134-chr3-Intron-SNP-C-C-T	0.000792766	FANCD2	29942525-29942525-chr6-5'UTR-SNP-G-G-C	0.000371319	HLA-A				SS18L1 Synonymous	0.000637576	SS18L1
493	8955464-8955464-chr19-Missense_Mutation-SNP-T-T-G	0.000638657	MUC16	KIF5B Non_Silent	0.000732086	KIF5B	SFPQ Intron	0.00079086	SFPQ	MUC4 UTR	0.000365152	MUC4				FGFR4 Synonymous	0.000637576	FGFR4
494	EGF Intron	0.000638411	EGF	PARG Non_Silent	0.000732086	PARG	FLCN Intron	0.00078912	FLCN	117624727-117624727-chr1-3'UTR-DEL-A-A--	0.000354243	FAM46C				RP1 Synonymous	0.000637576	RP1
495	TG Non_Silent	0.000638261	TG	44253579-44253579-chr6-Missense_Mutation-SNP-G-G-A	0.000732086	HSP90AB1	PRDM2 Intron	0.000788975	PRDM2	BCL3 UTR	0.000351372	BCL3				FOXO1 Synonymous	0.000637576	FOXO1
496	ATP2B3 Synonymous	0.000637669	ATP2B3	UTY Non_Silent	0.000732086	UTY	CNTRL Intron	0.000788016	CNTRL	KAT6A UTR	0.00034975	KAT6A				155066002-155066002-chrX-Synonymous-SNP-T-T-C	0.000637576	MTCP1
497	40293946-40293946-chr17-Splice_Region-SNP-A-A-T	0.000637534	CDC6	GNAS Non_Silent	0.000731957	GNAS	ABI1 Intron	0.000786761	ABI1	72784545-72784546-chr16-3'UTR-DEL-AT-AT--	0.000337533	ZFHX3				GPC3 Synonymous	0.000637576	GPC3
498	44253648-44253648-chr6-3'UTR-DEL-G-G--	0.000637134	HSP90AB1	108734572-108734573-chrX-Frame_Shift_Ins-INS-----C	0.000731617	IRS4	TCP1 Intron	0.000786732	TCP1	MSH6 UTR	0.000333724	MSH6				PRPF4 Synonymous	0.000637576	PRPF4
499	ZNRF3 Non_Silent	0.000635992	ZNRF3	DDX3X Non_Silent	0.000729263	DDX3X	29296723-29296724-chr2-Intron-DEL-GT-GT--	0.000786617	ALK	BRIP1 UTR	0.000330585	BRIP1				AFF1 Synonymous	0.000637576	AFF1
500	BCR UTR	0.000635023	BCR	C6 Non_Silent	0.000729218	C6	NFIB Intron	0.000786602	NFIB	SF1 UTR	0.000302899	SF1				MYB Synonymous	0.000637576	MYB
501	10064848-10064848-chr3-Missense_Mutation-SNP-C-C-T	0.000634066	FANCD2	SMARCA4 Non_Silent	0.000728828	SMARCA4	ATP2B3 Intron	0.000786412	ATP2B3	29945517-29945517-chr6-3'UTR-SNP-G-G-C	0.000301679	HLA-A				195783105-195783105-chr3-Synonymous-SNP-C-C-T	0.000637576	MUC4
502	161673277-161673277-chr1-Intron-SNP-C-C-T	0.000633924	FCGR2B	134138073-134138074-chr5-Frame_Shift_Ins-INS-----C	0.000728425	TCF7	48684242-48684242-chrX-Intron-SNP-C-C-A	0.000784925	WAS	PIK3CA UTR	0.00027332	PIK3CA				NDRG1 Synonymous	0.000637576	NDRG1
503	LZTR1 Intron	0.000632976	LZTR1	MAP3K13 Non_Silent	0.000728425	MAP3K13	HIF1A Intron	0.000784476	HIF1A	MEN1 UTR	0.000245985	MEN1				8952842-8952842-chr19-Synonymous-SNP-A-A-G	0.000637576	MUC16
504	HLA-A Synonymous	0.000632834	HLA-A	LPP Non_Silent	0.000728425	LPP	MET Intron	0.000784025	MET	44253750-44253750-chr6-3'UTR-SNP-T-T-C	0.000224186	HSP90AB1				8896008-8896008-chr19-Synonymous-SNP-G-G-A	0.000637576	MUC16
505	ASXL2 Intron	0.000632012	ASXL2	14158225-14158225-chr3-Missense_Mutation-SNP-C-C-G	0.000728425	XPC	LMNA Intron	0.000783479	LMNA	DDX10 UTR	0.000219265	DDX10				EML4 Synonymous	0.000637576	EML4
506	PRRX1 UTR	0.000632012	PRRX1	TBP Non_Silent	0.000728425	TBP	117328787-117328787-chr6-Intron-SNP-T-T-G	0.000782845	ROS1	MAX UTR	0.000203222	MAX				CTCF Synonymous	0.000637576	CTCF
507	42217112-42217113-chr17-Intron-DEL-CA-CA--	0.000632012	STAT5B	185099942-185099942-chr1-Missense_Mutation-SNP-A-A-C	0.000728425	RNF2	SH3GL1 Intron	0.000782736	SH3GL1	ITGAV UTR	0.000170909	ITGAV				TRIM33 Synonymous	0.000637576	TRIM33
508	236513-236513-chr5-Missense_Mutation-SNP-C-C-T	0.000632012	SDHA	ZNF2 Non_Silent	0.000728425	ZNF2	PRRX1 Intron	0.000781513	PRRX1	100702977-100702977-chr8-3'UTR-SNP-C-C-T	0.000153035	PABPC1				EWSR1 Synonymous	0.000637576	EWSR1
509	PAX3 Intron	0.000631771	PAX3	57175909-57175909-chr12-Missense_Mutation-SNP-A-A-C	0.000727028	LRP1	31189856-31189856-chr16-Intron-SNP-C-C-A	0.000779125	FUS	RET UTR	0.000137316	RET				21445735-21445735-chr22-Synonymous-SNP-G-G-C	0.000637576	HIC2
510	BCL9L Intron	0.000631449	BCL9L	100704992-100704992-chr8-Missense_Mutation-SNP-C-C-T	0.000720616	PABPC1	MEN1 Intron	0.000776195	MEN1	DGCR8 UTR	0.000132422	DGCR8				28689180-28689180-chr22-Synonymous-SNP-C-C-G	0.00062521	CHEK2
511	50782526-50782527-chr16-Intron-DEL-GT-GT--	0.000630764	CYLD	XPC Non_Silent	0.0007182	XPC	68529886-68529887-chr17-Intron-INS-----TGTT	0.000775863	PRKAR1A	BCL2L1 UTR	0.000128579	BCL2L1				152238746-152238746-chr7-Synonymous-SNP-G-G-A	0.000624703	KMT2C
512	CIITA Intron	0.000630013	CIITA	BCL11B Non_Silent	0.000716716	BCL11B	KL Intron	0.000774783	KL	SDC4 UTR	0.000126071	SDC4				29944153-29944153-chr6-Synonymous-SNP-C-C-T	0.000621604	HLA-A
513	100704992-100704992-chr8-Missense_Mutation-SNP-C-C-T	0.000629707	PABPC1	MYH1 Non_Silent	0.000714561	MYH1	PABPC1 Intron	0.000770423	PABPC1	EBF1 UTR	0.000105373	EBF1				KMT2A Synonymous	0.000617808	KMT2A
514	29944153-29944153-chr6-Synonymous-SNP-C-C-T	0.000629707	HLA-A	15937498-15937498-chr1-Missense_Mutation-SNP-A-A-C	0.000712061	SPEN	RSF1 Intron	0.000768296	RSF1	119300144-119300145-chr11-3'UTR-DEL-GT-GT--	9.4408e-05	CBL				PBRM1 Synonymous	0.000607792	PBRM1
515	KDM6A Non_Silent	0.000628729	KDM6A	KL Non_Silent	0.000711202	KL	136736576-136736576-chr3-Intron-SNP-G-G-T	0.000767571	STAG1	MKL1 UTR	8.45662e-05	MKL1				87228798-87228798-chr10-Synonymous-SNP-C-C-T	0.000595931	NUTM2A
516	FOXP1 Intron	0.000628563	FOXP1	MLH1 Non_Silent	0.000711202	MLH1	KIF5B Intron	0.000767246	KIF5B	TRIM33 UTR	7.09539e-05	TRIM33				100709642-100709642-chr8-Synonymous-SNP-G-G-A	0.000580837	PABPC1
517	SEPT9 Non_Silent	0.000628495	SEPT9	75030816-75030816-chr10-Missense_Mutation-SNP-T-T-C	0.000711202	KAT6B	NBN Intron	0.000767004	NBN	TPM3 UTR	7.06673e-05	TPM3				ERCC5 Synonymous	0.000578218	ERCC5
518	TK1 Intron	0.000627805	TK1	7675088-7675088-chr17-Missense_Mutation-SNP-C-C-T	0.000711202	TP53	ALK Intron	0.000766359	ALK	RUNX1 UTR	5.26389e-05	RUNX1				195779136-195779136-chr3-Synonymous-SNP-G-G-A	0.000545468	MUC4
519	WHSC1L1 Synonymous	0.000627805	WHSC1L1	H3F3B Non_Silent	0.000711202	H3F3B	CHD4 Intron	0.000766203	CHD4	MALAT1 UTR	5.04555e-05	MALAT1				WHSC1 Synonymous	0.000544528	WHSC1
520	119997159-119997159-chr1-Missense_Mutation-SNP-T-T-G	0.000627805	NOTCH2	RCC2 Non_Silent	0.000711202	RCC2	SPEN Intron	0.00076569	SPEN	GRM3 UTR	3.39956e-05	GRM3				MAP3K13 Synonymous	0.000544238	MAP3K13
521	NF1 Intron	0.000627706	NF1	SOX2 Non_Silent	0.000711202	SOX2	NTRK3 Intron	0.00076564	NTRK3	79599909-79599911-chr16-5'UTR-DEL-GCC-GCC--	3.02707e-05	MAF				152273712-152273712-chr7-Synonymous-SNP-A-A-T	0.000510394	KMT2C
522	41940902-41940904-chr8-In_Frame_Del-DEL-CTC-CTC--	0.000625843	KAT6A	AXIN1 Non_Silent	0.000711202	AXIN1	SMARCE1 Intron	0.000763084	SMARCE1	FLI1 UTR	1.07035e-05	FLI1				23314603-23314603-chr22-Synonymous-SNP-G-G-A	0.000468039	BCR
523	55759144-55759144-chr6-Intron-SNP-C-C-A	0.000624747	BMP5	COL2A1 Non_Silent	0.00070825	COL2A1	SMARCA4 Intron	0.000762209	SMARCA4							SPEN Synonymous	0.000459752	SPEN
524	207564326-207564327-chr1-Intron-DEL-AC-AC--	0.000624482	CR1	MN1 Non_Silent	0.00070493	MN1	ZNF3 Intron	0.000761057	ZNF3							BCOR Synonymous	0.00045789	BCOR
525	LRP1B Intron	0.000624322	LRP1B	CEP89 Non_Silent	0.00070089	CEP89	49885105-49885106-chr10-Intron-DEL-TC-TC--	0.000758295	PARG							8886823-8886823-chr19-Synonymous-SNP-G-G-A	0.000455607	MUC16
526	TAF15 Intron	0.000623399	TAF15	AR Non_Silent	0.000698064	AR	EIF1AX Intron	0.00075549	EIF1AX							TFE3 Synonymous	0.000449819	TFE3
527	MLLT1 Intron	0.000623292	MLLT1	GAS7 Non_Silent	0.000696074	GAS7	EPHA7 Intron	0.000754064	EPHA7							39407880-39407880-chr17-Synonymous-SNP-A-A-G	0.000443355	MED1
528	ETV5 Intron	0.000621395	ETV5	57126023-57126023-chr7-Missense_Mutation-SNP-T-T-C	0.000686736	ZNF479	AR Intron	0.000753911	AR							195785697-195785697-chr3-Synonymous-SNP-T-T-C	0.000435674	MUC4
529	10046849-10046852-chr3-Intron-DEL-AATC-AATC--	0.000621232	FANCD2	149005097-149005097-chr1-Missense_Mutation-SNP-A-A-G	0.000681818	PDE4DIP	77599585-77599588-chrX-Splice_Region-DEL-AAAC-AAAC--	0.000751435	ATRX							8910501-8910501-chr19-Synonymous-SNP-A-A-G	0.000430294	MUC16
530	75022148-75022153-chr10-In_Frame_Del-DEL-GAAGAA-GAAGAA--	0.000621112	KAT6B	67168951-67168951-chr14-Missense_Mutation-SNP-T-T-G	0.000680085	GPHN	32741974-32741974-chr8-Intron-DEL-T-T--	0.000751307	NRG1							38985994-38985994-chr22-Synonymous-SNP-T-T-C	0.000428876	APOBEC3B
531	10048144-10048144-chr3-Intron-SNP-G-G-A	0.000620656	FANCD2	MPL Non_Silent	0.000675951	MPL	10064460-10064460-chr3-Intron-SNP-C-C-T	0.000749847	FANCD2							NCOR1 Synonymous	0.000414977	NCOR1
532	PRDM16 Intron	0.000617595	PRDM16	PC Non_Silent	0.000674788	PC	27650165-27650166-chr12-Intron-DEL-CT-CT--	0.000749436	PPFIBP1							SRGAP3 Synonymous	0.000397516	SRGAP3
533	140370686-140370687-chr2-Intron-DEL-CA-CA--	0.000617531	LRP1B	195782779-195782779-chr3-Missense_Mutation-SNP-A-A-G	0.000672444	MUC4	SMAD3 Intron	0.000744285	SMAD3							197408400-197408400-chr2-Synonymous-SNP-T-T-G	0.000386247	SF3B1
534	LARP4 Intron	0.000617268	LARP4	TNK1 Non_Silent	0.000664179	TNK1	127271490-127271491-chr2-Intron-DEL-AA-AA--	0.000743054	ERCC3							PTPRT Synonymous	0.000383126	PTPRT
535	207614451-207614451-chr1-Missense_Mutation-SNP-T-T-C	0.000616737	CR1	MECOM Non_Silent	0.00066079	MECOM	SEPT9 Intron	0.000742845	SEPT9							33013319-33013319-chr1-Synonymous-SNP-G-G-A	0.000379447	AK2
536	CBLC Intron	0.000615691	CBLC	ARHGEF12 Non_Silent	0.000656192	ARHGEF12	CBLC Intron	0.000740952	CBLC							136278266-136278266-chr6-Synonymous-SNP-T-T-C	0.000370427	BCLAF1
537	PTPN13 Intron	0.0006153	PTPN13	100709705-100709705-chr8-Frame_Shift_Del-DEL-T-T--	0.0006495	PABPC1	75556285-75556285-chr7-Intron-SNP-A-A-C	0.000737766	HIP1							256399-256399-chr5-Synonymous-SNP-G-G-C	0.000350485	SDHA
538	32092134-32092134-chr14-Missense_Mutation-SNP-G-G-A	0.000614036	ARHGAP5	ZNF479 Non_Silent	0.000649164	ZNF479	113247001-113247002-chr2-Intron-DEL-GT-GT--	0.000736656	PAX8							5135261-5135261-chr17-Synonymous-SNP-G-G-C	0.000346638	USP6
539	134053272-134053272-chr9-Missense_Mutation-SNP-T-T-G	0.000613987	BRD3	SMAD2 Non_Silent	0.000648973	SMAD2	KLK2 Intron	0.00073189	KLK2							CIITA Synonymous	0.00034214	CIITA
540	FANCC Intron	0.000613492	FANCC	52321433-52321433-chr15-Missense_Mutation-SNP-A-A-C	0.000645496	MYO5A	CSF1R Intron	0.000727963	CSF1R							NCOA2 Synonymous	0.000335156	NCOA2
541	TCL1A Intron	0.000613021	TCL1A	179218303-179218303-chr3-Missense_Mutation-SNP-G-G-A	0.000644751	PIK3CA	HERPUD1 Intron	0.000727372	HERPUD1							MET Synonymous	0.000288783	MET
542	MALT1 Intron	0.00061291	MALT1	130055979-130055979-chrX-Missense_Mutation-SNP-T-T-G	0.000643964	BCORL1	50782526-50782527-chr16-Intron-DEL-GT-GT--	0.000725521	CYLD							MSH6 Synonymous	0.000277533	MSH6
543	DCC Intron	0.000612692	DCC	DAXX Non_Silent	0.000643374	DAXX	SF3B1 Intron	0.000724327	SF3B1							F12 Synonymous	0.000270452	F12
544	MLLT4 Intron	0.00061268	MLLT4	FBXW7 Non_Silent	0.000641198	FBXW7	MYH11 Intron	0.000720223	MYH11							8952839-8952839-chr19-Synonymous-SNP-T-T-G	0.000268794	MUC16
545	CCND1 Intron	0.000612058	CCND1	CTNND1 Non_Silent	0.000638666	CTNND1	CASP8 Intron	0.000719764	CASP8							SETD2 Synonymous	0.000260527	SETD2
546	RBM10 Intron	0.000611572	RBM10	15928647-15928648-chr1-Frame_Shift_Del-DEL-GA-GA--	0.000638475	SPEN	2055347-2055347-chr16-Intron-SNP-T-T-G	0.000719511	TSC2							IL7R Synonymous	0.000256169	IL7R
547	OTC Intron	0.000611311	OTC	JAK1 Non_Silent	0.000632725	JAK1	LASP1 Intron	0.000717354	LASP1							STAG1 Synonymous	0.00025579	STAG1
548	SMC1A Intron	0.000610949	SMC1A	8897653-8897653-chr19-Missense_Mutation-SNP-C-C-G	0.000632109	MUC16	KTN1 Intron	0.000717044	KTN1							SDHA Synonymous	0.000231966	SDHA
549	CLTCL1 Intron	0.000610306	CLTCL1	100712775-100712775-chr8-Missense_Mutation-SNP-C-C-A	0.000631607	PABPC1	KDM5C Intron	0.000716645	KDM5C							195781545-195781545-chr3-Synonymous-SNP-C-C-A	0.000227147	MUC4
550	29944067-29944067-chr6-Intron-SNP-T-T-A	0.000610065	HLA-A	2924307-2924309-chr7-In_Frame_Del-DEL-GGA-GGA--	0.000631145	CARD11	CD28 Intron	0.000716601	CD28							UBP1 Synonymous	0.000225093	UBP1
551	GRIN2A Flank	0.000608089	GRIN2A	JAK3 Non_Silent	0.000629615	JAK3	5130511-5130511-chr17-Intron-SNP-A-A-C	0.00071547	USP6							SETBP1 Synonymous	0.000202021	SETBP1
552	XPA Intron	0.000608026	XPA	TG Non_Silent	0.000628453	TG	GOLGA5 Intron	0.000713721	GOLGA5							BCL11B Synonymous	0.000192447	BCL11B
553	TNC Non_Silent	0.000607797	TNC	9688140-9688142-chrX-In_Frame_Del-DEL-GCG-GCG--	0.000627449	TBL1X	ERCC3 Intron	0.000710433	ERCC3							FANCA Synonymous	0.00018737	FANCA
554	TAT Intron	0.00060749	TAT	CLIP1 Non_Silent	0.000623844	CLIP1	29197730-29197731-chr2-Intron-DEL-CA-CA--	0.000709728	ALK							47280934-47280934-chr1-Synonymous-SNP-T-T-G	0.000184138	STIL
555	162776162-162776162-chr1-Missense_Mutation-SNP-C-C-A	0.000606366	DDR2	TBL1X Non_Silent	0.00062185	TBL1X	LEF1 Intron	0.000707455	LEF1							FAM47C Synonymous	0.000178113	FAM47C
556	IKZF1 Non_Silent	0.000606048	IKZF1	100709223-100709223-chr8-Missense_Mutation-SNP-T-T-A	0.000618591	PABPC1	WIF1 Intron	0.000707337	WIF1							MTA1 Synonymous	0.000163727	MTA1
557	PIK3CB Non_Silent	0.000605745	PIK3CB	CNOT3 Non_Silent	0.00061793	CNOT3	29268467-29268467-chr22-Intron-SNP-A-A-C	0.000706966	EWSR1							8886739-8886739-chr19-Synonymous-SNP-G-G-A	0.000153157	MUC16
558	211387006-211387006-chr2-Missense_Mutation-SNP-T-T-G	0.000601592	ERBB4	ERCC5 Non_Silent	0.000615506	ERCC5	10048157-10048157-chr3-Intron-SNP-C-C-A	0.000706966	FANCD2							ARC Synonymous	0.000145439	ARC
559	HMGA2 Intron	0.00060068	HMGA2	A1CF Non_Silent	0.000611086	A1CF	77487637-77487637-chr17-Intron-SNP-A-A-G	0.000706966	SEPT9							50492761-50492761-chr15-Synonymous-SNP-C-C-A	0.000143772	USP8
560	195782779-195782779-chr3-Missense_Mutation-SNP-A-A-G	0.000600115	MUC4	ACVR2A Non_Silent	0.000609529	ACVR2A	TGFBR2 Intron	0.000706966	TGFBR2							29225546-29225546-chr2-Synonymous-SNP-T-T-G	0.000139622	ALK
561	RB1 Non_Silent	0.00059992	RB1	24706675-24706675-chr2-Missense_Mutation-SNP-G-G-C	0.00060712	NCOA1	41661466-41661466-chr8-Intron-SNP-T-T-G	0.000706966	ANK1							41468447-41468447-chr21-Synonymous-SNP-T-T-G	0.000116261	TMPRSS2
562	AKAP9 Intron	0.000599817	AKAP9	FLT4 Non_Silent	0.000605387	FLT4	152235812-152235812-chr7-Splice_Region-SNP-C-C-A	0.000704212	KMT2C							ASXL2 Synonymous	8.7906e-05	ASXL2
563	FAH Intron	0.000599375	FAH	NUMA1 Non_Silent	0.000601904	NUMA1	74988957-74988957-chr10-Intron-SNP-T-T-G	0.000703916	KAT6B							195785760-195785760-chr3-Synonymous-SNP-A-A-G	8.08219e-05	MUC4
564	40687055-40687055-chr20-3'UTR-SNP-T-T-G	0.000599358	MAFB	BARD1 Non_Silent	0.000600629	BARD1	152185756-152185756-chr7-Intron-SNP-C-C-T	0.000703916	KMT2C							SFRP4 Synonymous	6.15126e-05	SFRP4
565	161673275-161673275-chr1-Intron-SNP-G-G-C	0.00059821	FCGR2B	186057145-186057145-chr3-Missense_Mutation-SNP-T-T-G	0.000598156	ETV5	MYC Intron	0.000703916	MYC							PIK3R1 Synonymous	5.99628e-05	PIK3R1
566	CHEK2 Intron	0.000596723	CHEK2	27198268-27198268-chr7-Missense_Mutation-SNP-A-A-C	0.00059491	HOXA13	DEK Intron	0.000703916	DEK							NFKB2 Synonymous	4.06568e-05	NFKB2
567	OXR1 Intron	0.000596262	OXR1	NCOR1 Non_Silent	0.000591975	NCOR1	29943611-29943611-chr6-Intron-SNP-G-G-A	0.000703916	HLA-A							BCR Synonymous	2.8489e-05	BCR
568	PTCH1 Intron	0.000594505	PTCH1	58782452-58782454-chr1-In_Frame_Del-DEL-GCT-GCT--	0.000591885	JUN	9764976-9764978-chr16-Intron-DEL-CAG-CAG--	0.000703916	GRIN2A							DROSHA Synonymous	2.69204e-05	DROSHA
569	FLNA Non_Silent	0.000593811	FLNA	32976375-32976375-chr7-Nonsense_Mutation-SNP-T-T-G	0.000590623	FKBP9	6709622-6709622-chr19-Intron-SNP-T-T-C	0.000703002	C3							ETV4 Synonymous	1.16643e-05	ETV4
570	DDX3X Intron	0.000593592	DDX3X	CYLD Non_Silent	0.000587631	CYLD	5130477-5130477-chr17-Intron-SNP-C-C-T	0.000703002	USP6
571	CAMTA1 Non_Silent	0.000593568	CAMTA1	BIRC3 Non_Silent	0.000587281	BIRC3	39240940-39240945-chr22-Intron-DEL-CACTCT-CACTCT--	0.000703002	PDGFB
572	TSC1 Intron	0.000592603	TSC1	157206300-157206300-chr6-Missense_Mutation-SNP-A-A-C	0.000587163	ARID1B	42293912-42293912-chr19-Intron-SNP-A-A-G	0.000703002	CIC
573	ERBB3 Intron	0.000591695	ERBB3	49033123-49033125-chr12-In_Frame_Del-DEL-TGC-TGC--	0.000581088	KMT2D	185417380-185417384-chr3-Intron-DEL-TTCTT-TTCTT--	0.000703002	MAP3K13
574	14178466-14178468-chr3-In_Frame_Del-DEL-CCT-CCT--	0.000590279	XPC	HOXA1 Non_Silent	0.000576325	HOXA1	102572927-102572927-chr10-Intron-SNP-C-C-T	0.000703002	SUFU
575	SDHB Intron	0.000589727	SDHB	ATR Non_Silent	0.000570557	ATR	152235734-152235734-chr7-Intron-SNP-T-T-A	0.000703002	KMT2C
576	AKAP9 Non_Silent	0.000587598	AKAP9	6601979-6601981-chr12-In_Frame_Del-DEL-TCC-TCC--	0.000567371	CHD4	75559723-75559723-chr7-Intron-SNP-A-A-C	0.000703002	HIP1
577	AXIN1 Non_Silent	0.000586578	AXIN1	100704967-100704967-chr8-Missense_Mutation-SNP-G-G-C	0.000566454	PABPC1	52925387-52925387-chr18-Intron-SNP-A-A-G	0.000702828	DCC
578	BRD3 Intron	0.000586489	BRD3	PIK3R1 Non_Silent	0.000563872	PIK3R1	8896164-8896164-chr19-Intron-SNP-C-C-T	0.000701721	MUC16
579	DCC Non_Silent	0.000586264	DCC	131198197-131198197-chr9-Missense_Mutation-SNP-C-C-A	0.000560606	NUP214	FANCD2 Intron	0.000701012	FANCD2
580	152265211-152265211-chr7-Splice_Site-SNP-T-T-C	0.000584157	KMT2C	FOXO3 Non_Silent	0.000560331	FOXO3	ETV4 Intron	0.000700347	ETV4
581	BCORL1 Non_Silent	0.000583625	BCORL1	MYH9 Non_Silent	0.000558203	MYH9	FLT3 Intron	0.00070015	FLT3
582	SMAD4 Intron	0.00058349	SMAD4	TCF3 Non_Silent	0.000557361	TCF3	STAT5B Intron	0.000699407	STAT5B
583	44782363-44782363-chr19-Splice_Region-SNP-A-A-C	0.000583085	CBLC	UBR5 Non_Silent	0.000552812	UBR5	WWP2 Intron	0.0006994	WWP2
584	TSHR Non_Silent	0.000582426	TSHR	29944124-29944124-chr6-Missense_Mutation-SNP-C-C-G	0.000552608	HLA-A	RECQL4 Intron	0.000699194	RECQL4
585	10047709-10047709-chr3-Intron-SNP-T-T-A	0.0005818	FANCD2	152248119-152248119-chr7-Missense_Mutation-SNP-G-G-A	0.000552125	KMT2C	295812-295812-chr12-Intron-SNP-T-T-A	0.000699014	KDM5A
586	71140798-71140800-chrX-In_Frame_Del-DEL-CAG-CAG--	0.000580175	MED12	MKL1 Non_Silent	0.000551627	MKL1	ASXL2 Intron	0.000697996	ASXL2
587	TRIM2 UTR	0.00057986	TRIM2	HNRNPA2B1 Non_Silent	0.000549445	HNRNPA2B1	TCF12 Intron	0.000697096	TCF12
588	RB1 Intron	0.000579592	RB1	TCF7 Non_Silent	0.000548694	TCF7	TRIM24 Intron	0.000688796	TRIM24
589	6601979-6601981-chr12-In_Frame_Del-DEL-TCC-TCC--	0.000579204	CHD4	236534-236534-chr5-Missense_Mutation-SNP-C-C-T	0.00054822	SDHA	31361099-31361099-chr10-Intron-SNP-C-C-A	0.000688759	ZEB1
590	MYO5A Intron	0.000578977	MYO5A	CSF1 Non_Silent	0.000538714	CSF1	RP1 Intron	0.000686827	RP1
591	41227186-41227187-chr3-Intron-DEL-AT-AT--	0.000578167	CTNNB1	60788112-60788112-chr10-Missense_Mutation-SNP-T-T-G	0.000537219	CDK1	ISX Intron	0.000686827	ISX
592	RARA UTR	0.000577585	RARA	MTA1 Non_Silent	0.000536216	MTA1	35040925-35040925-chr13-Splice_Region-SNP-A-A-T	0.000686827	NBEA
593	EP300 Non_Silent	0.000577007	EP300	FANCD2 Non_Silent	0.000534415	FANCD2	10048202-10048202-chr3-Intron-SNP-G-G-T	0.000686827	FANCD2
594	HOXA9 Non_Silent	0.000576627	HOXA9	100704954-100704954-chr8-Missense_Mutation-SNP-A-A-G	0.000533545	PABPC1	10047770-10047770-chr3-Intron-SNP-T-T-C	0.000686827	FANCD2
595	ATRX Non_Silent	0.00057621	ATRX	ECT2 Non_Silent	0.000533118	ECT2	GNAQ Intron	0.000686827	GNAQ
596	152265184-152265184-chr7-Synonymous-SNP-C-C-T	0.000575414	KMT2C	PHOX2B Non_Silent	0.000532946	PHOX2B	154359451-154359451-chrX-Intron-SNP-A-A-C	0.000686827	FLNA
597	AFF4 Intron	0.000574126	AFF4	96254043-96254045-chr2-In_Frame_Del-DEL-TGC-TGC--	0.00053246	TMEM127	USP8 Intron	0.000686654	USP8
598	DCAF12 Intron	0.000573498	DCAF12	18263848-18263850-chr6-In_Frame_Del-DEL-TCC-TCC--	0.000531973	DEK	LARP4 Intron	0.00068664	LARP4
599	115076417-115076417-chr9-Missense_Mutation-SNP-G-G-T	0.000573273	TNC	34354590-34354590-chr15-Missense_Mutation-SNP-T-T-G	0.000531204	NUTM1	3012168-3012168-chr11-Intron-SNP-A-A-C	0.000685913	CARS
600	STAG2 Intron	0.000572513	STAG2	PRDM2 Non_Silent	0.000530976	PRDM2	NUMA1 Intron	0.000685913	NUMA1
601	NFKB2 Intron	0.000572098	NFKB2	127703283-127703283-chr7-Missense_Mutation-SNP-G-G-C	0.000530172	SND1	29655717-29655719-chr22-Intron-DEL-TTT-TTT--	0.000685913	NF2
602	87228974-87228974-chr10-Intron-SNP-C-C-G	0.000571651	NUTM2A	152235905-152235905-chr7-Missense_Mutation-SNP-C-C-T	0.000528053	KMT2C	RLF Intron	0.000685913	RLF
603	SND1 Non_Silent	0.000571586	SND1	FANCA Non_Silent	0.000526447	FANCA	PRPF40B Intron	0.000685913	PRPF40B
604	PREX2 Intron	0.000571511	PREX2	VAV1 Non_Silent	0.000525096	VAV1	TPM4 Intron	0.000685913	TPM4
605	43057017-43057017-chr17-Intron-SNP-T-T-G	0.000570424	BRCA1	71383150-71383150-chrX-Frame_Shift_Del-DEL-A-A--	0.000523665	TAF1	ATF1 Intron	0.000685913	ATF1
606	75022148-75022150-chr10-In_Frame_Del-DEL-GAA-GAA--	0.000570324	KAT6B	SF1 Non_Silent	0.000523564	SF1	CREB1 Intron	0.000685913	CREB1
607	U2 Flank	0.000567064	U2	MTOR Non_Silent	0.000521331	MTOR	RPL5 Intron	0.000685913	RPL5
608	NT5C2 Non_Silent	0.000564301	NT5C2	41940902-41940904-chr8-In_Frame_Del-DEL-CTC-CTC--	0.000521272	KAT6A	DDB2 Intron	0.000683693	DDB2
609	KMT2D Intron	0.000563813	KMT2D	15238895-15238897-chr19-In_Frame_Del-DEL-GCT-GCT--	0.000519821	BRD4	CHCHD7 Intron	0.000682863	CHCHD7
610	BRCA1 Intron	0.000563324	BRCA1	92005779-92005779-chr14-Missense_Mutation-SNP-A-A-C	0.000519166	TRIP11	LIF Intron	0.000682863	LIF
611	FCGR2B Non_Silent	0.000561794	FCGR2B	HIP1 Non_Silent	0.000518155	HIP1	10046539-10046539-chr3-Intron-SNP-T-T-G	0.000682863	FANCD2
612	CHD4 Non_Silent	0.000561047	CHD4	CA1 Non_Silent	0.000516432	CA1	31096749-31096749-chr8-Intron-SNP-C-C-T	0.000682863	WRN
613	CLIP1 Synonymous	0.000560768	CLIP1	SMO Non_Silent	0.000514999	SMO	15759314-15759315-chr16-Intron-DEL-AG-AG--	0.000682863	MYH11
614	SEPT6 Intron	0.000560684	SEPT6	MYD88 Non_Silent	0.000514524	MYD88	92998474-92998474-chr15-Intron-SNP-T-T-G	0.000682863	CHD2
615	PAX7 Intron	0.000559445	PAX7	HOXA11 Non_Silent	0.000513688	HOXA11	25235868-25235868-chr2-Intron-SNP-A-A-C	0.000682863	DNMT3A
616	MUC1 Intron	0.000559401	MUC1	53495166-53495168-chr3-Missense_Mutation-DEL-GAT-GAT--	0.000508314	CACNA1D	92077068-92077070-chr7-Intron-DEL-TTA-TTA--	0.00068197	AKAP9
617	KDM5A Intron	0.000559362	KDM5A	27798946-27798948-chr22-In_Frame_Del-DEL-TGC-TGC--	0.000507845	MN1	10064724-10064724-chr3-Splice_Region-SNP-C-C-T	0.000680574	FANCD2
618	102572959-102572959-chr10-Intron-SNP-A-A-G	0.000557016	SUFU	MEN1 Non_Silent	0.000507726	MEN1	118502304-118502305-chr11-Intron-DEL-AT-AT--	0.000678335	KMT2A
619	115086891-115086891-chr9-Missense_Mutation-SNP-G-G-T	0.000556877	TNC	IK Non_Silent	0.000507273	IK	BAP1 Intron	0.000677294	BAP1
620	33010752-33010752-chr1-3'Flank-SNP-C-C-T	0.000556631	AK2	RP1 Non_Silent	0.000507182	RP1	SS18L1 Intron	0.000677087	SS18L1
621	1278442-1278443-chr5-Intron-DEL-CA-CA--	0.000555939	TERT	FGFR1 Non_Silent	0.000505255	FGFR1	53195909-53195909-chrX-Splice_Region-SNP-T-T-G	0.000677087	KDM5C
622	6602041-6602043-chr12-In_Frame_Del-DEL-CTT-CTT--	0.000555402	CHD4	CER1 Non_Silent	0.000502326	CER1	8896143-8896143-chr19-Intron-SNP-G-G-C	0.000677087	MUC16
623	RPL10 Non_Silent	0.000554914	RPL10	BMP5 Non_Silent	0.000502202	BMP5	17221524-17221524-chr17-Intron-SNP-A-A-C	0.000677087	FLCN
624	SRGAP3 UTR	0.0005549	SRGAP3	32433356-32433356-chr20-Missense_Mutation-SNP-G-G-T	0.000499609	ASXL1	152247823-152247823-chr7-Intron-SNP-C-C-A	0.000677087	KMT2C
625	33005339-33005339-chr7-Missense_Mutation-SNP-C-C-G	0.000554879	FKBP9	SP9 Non_Silent	0.000495528	SP9	41339013-41339014-chrX-Intron-DEL-TA-TA--	0.000677087	DDX3X
626	DNM2 Intron	0.000554679	DNM2	SKI Non_Silent	0.000494385	SKI	CDK6 Intron	0.000677087	CDK6
627	CUX1 Intron	0.000554606	CUX1	31945348-31945348-chr6-Missense_Mutation-SNP-A-A-C	0.000491017	C2	131988790-131988790-chr5-Intron-SNP-T-T-G	0.000677087	ACSL6
628	BCR Intron	0.000554537	BCR	150120080-150120080-chr5-Missense_Mutation-SNP-T-T-G	0.000490448	PDGFRB	EIF4A2 Intron	0.000677087	EIF4A2
629	POLE Synonymous	0.000554147	POLE	100709202-100709202-chr8-Missense_Mutation-SNP-A-A-G	0.000487621	PABPC1	BCL11A Intron	0.000677087	BCL11A
630	AFF3 Intron	0.000553991	AFF3	50492753-50492753-chr15-Missense_Mutation-SNP-C-C-T	0.000485129	USP8	CDK12 Intron	0.000676172	CDK12
631	10046905-10046905-chr3-Intron-SNP-G-G-A	0.000553685	FANCD2	ATRX Non_Silent	0.000484278	ATRX	157587250-157587250-chr1-Intron-SNP-A-A-G	0.000676172	FCRL4
632	100709202-100709202-chr8-Missense_Mutation-SNP-A-A-G	0.000552697	PABPC1	HLF Non_Silent	0.000481264	HLF	51471657-51471657-chr1-Intron-DEL-A-A--	0.000676172	EPS15
633	FBXO11 Non_Silent	0.000552054	FBXO11	AKT2 Non_Silent	0.000480505	AKT2	TNFAIP3 Intron	0.000675458	TNFAIP3
634	BCR Flank	0.000551871	BCR	10496144-10496144-chr17-Missense_Mutation-SNP-G-G-T	0.000480178	MYH1	XPC Intron	0.00067516	XPC
635	236563-236563-chr5-Missense_Mutation-SNP-G-G-A	0.00054867	SDHA	T Non_Silent	0.000475776	T	CCND3 Intron	0.000674451	CCND3
636	JAK2 Intron	0.000548479	JAK2	147918575-147918575-chr2-Missense_Mutation-SNP-A-A-C	0.000472402	ACVR2A	ATRX Intron	0.000673198	ATRX
637	DROSHA Non_Silent	0.000547027	DROSHA	195786562-195786562-chr3-Missense_Mutation-SNP-G-G-A	0.00046239	MUC4	F3 Intron	0.000673122	F3
638	EGF Non_Silent	0.000546999	EGF	106425156-106425156-chr2-Missense_Mutation-SNP-A-A-C	0.000460461	RGPD3	F7 Intron	0.000673122	F7
639	NCOR1 Non_Silent	0.000546157	NCOR1	MYCL Non_Silent	0.000460098	MYCL	SRC Intron	0.000673122	SRC
640	FANCE Intron	0.000545571	FANCE	NCOA4 Non_Silent	0.000459153	NCOA4	DAXX Intron	0.000673122	DAXX
641	FIP1L1 Non_Silent	0.000543892	FIP1L1	EZH2 Non_Silent	0.000458657	EZH2	31181820-31181820-chr17-Intron-SNP-C-C-T	0.000673122	NF1
642	PIK3R1 Intron	0.0005437	PIK3R1	6667904-6667912-chr12-In_Frame_Del-DEL-TGCTGCTGC-TGCTGCTGC--	0.000455882	ZNF384	15267329-15267329-chr19-Intron-SNP-T-T-C	0.000673122	BRD4
643	PPFIBP1 Intron	0.000543682	PPFIBP1	CDH10 Non_Silent	0.000454714	CDH10	H3F3A Intron	0.000673122	H3F3A
644	169115580-169115580-chr3-Synonymous-SNP-T-T-G	0.000542213	MECOM	IKZF1 Non_Silent	0.000452011	IKZF1	68101437-68101437-chr8-Intron-SNP-A-A-C	0.000673122	PREX2
645	PLCG1 Non_Silent	0.000541284	PLCG1	211387006-211387006-chr2-Missense_Mutation-SNP-T-T-G	0.000449719	ERBB4	FCRL4 Intron	0.000666551	FCRL4
646	ARID1A Non_Silent	0.000540763	ARID1A	175146935-175146935-chr1-Missense_Mutation-SNP-T-T-G	0.0004478	TNN	142558524-142558527-chr3-Intron-DEL-AAAT-AAAT--	0.000665014	ATR
647	NUP214 Non_Silent	0.000540519	NUP214	236504-236504-chr5-Missense_Mutation-SNP-T-T-C	0.000447051	SDHA	TCL1A Intron	0.000664142	TCL1A
648	QKI UTR	0.000540119	QKI	38417884-38417884-chr8-Missense_Mutation-SNP-A-A-C	0.00044703	FGFR1	RECQL Intron	0.000663767	RECQL
649	161672984-161672984-chr1-Missense_Mutation-SNP-T-T-G	0.000539729	FCGR2B	27798893-27798895-chr22-In_Frame_Del-DEL-GCT-GCT--	0.000444324	MN1	FBLN2 Intron	0.00066152	FBLN2
650	TCP1 Intron	0.000536982	TCP1	36300902-36300904-chr22-In_Frame_Del-DEL-CTC-CTC--	0.000444158	MYH9	ERBB3 Intron	0.00066021	ERBB3
651	ERBB2 Intron	0.000536287	ERBB2	7673803-7673803-chr17-Missense_Mutation-SNP-G-G-A	0.000440003	TP53	45893388-45893389-chr12-Intron-DEL-TC-TC--	0.000659881	ARID2
652	ARC Non_Silent	0.00053585	ARC	C5 Non_Silent	0.000438498	C5	BRIP1 Intron	0.000659352	BRIP1
653	TET2 Non_Silent	0.000534127	TET2	CDH17 Non_Silent	0.000436707	CDH17	FAM135B Intron	0.000659287	FAM135B
654	TRAF7 Intron	0.000533995	TRAF7	27095695-27095697-chr7-In_Frame_Del-DEL-CGA-CGA--	0.000434516	HOXA1	MDS2 Intron	0.000658027	MDS2
655	98976756-98976756-chr7-Missense_Mutation-SNP-A-A-C	0.000529873	TRRAP	TFEB Non_Silent	0.000433273	TFEB	EIF3E Intron	0.000657185	EIF3E
656	152248140-152248140-chr7-Missense_Mutation-SNP-T-T-C	0.000529477	KMT2C	PTCH1 Non_Silent	0.000431598	PTCH1	8896095-8896095-chr19-Splice_Region-DEL-A-A--	0.000656497	MUC16
657	36292552-36292552-chr1-Intron-SNP-G-G-T	0.000528447	THRAP3	CBL Non_Silent	0.000426537	CBL	1212447-1212447-chrX-Intron-SNP-G-G-A	0.000656033	CRLF2
658	29945116-29945116-chr6-Intron-SNP-T-T-A	0.00052774	HLA-A	ELN Non_Silent	0.000424651	ELN	HLF Intron	0.000656033	HLF
659	256264-256264-chr5-Intron-SNP-C-C-T	0.000527484	SDHA	26779185-26779187-chr1-In_Frame_Del-DEL-GAA-GAA--	0.000424361	ARID1A	AXIN1 Intron	0.000656033	AXIN1
660	C2orf44 Intron	0.000526702	C2orf44	100705039-100705039-chr8-Missense_Mutation-SNP-G-G-A	0.000422634	PABPC1	BCL2 Intron	0.000656033	BCL2
661	152265180-152265180-chr7-Missense_Mutation-SNP-C-C-T	0.00052658	KMT2C	NFKB2 Non_Silent	0.000421668	NFKB2	BCOR Intron	0.000656033	BCOR
662	CD27 Intron	0.000525272	CD27	NRG1 Non_Silent	0.000419546	NRG1	HEY1 Intron	0.000656033	HEY1
663	POLQ Intron	0.00052515	POLQ	195785783-195785783-chr3-Missense_Mutation-SNP-C-C-G	0.000418412	MUC4	STAT6 Intron	0.000655972	STAT6
664	89333597-89333599-chr15-In_Frame_Del-DEL-TGC-TGC--	0.000524895	POLG	119278646-119278648-chr11-In_Frame_Del-DEL-ATG-ATG--	0.000412148	CBL	152273673-152273673-chr7-Intron-SNP-G-G-A	0.00065414	KMT2C
665	ERBB4 Non_Silent	0.000524568	ERBB4	2170713-2170715-chr16-In_Frame_Del-DEL-GAG-GAG--	0.000411773	TRAF7	GAS7 Intron	0.000653403	GAS7
666	152265205-152265205-chr7-Missense_Mutation-SNP-C-C-G	0.000522883	KMT2C	140653008-140653009-chr5-Frame_Shift_Del-DEL-GA-GA--	0.00040982	IK	TRIM3 Intron	0.000651506	TRIM3
667	8909446-8909446-chr19-Missense_Mutation-SNP-G-G-C	0.000522522	MUC16	ACSL6 Non_Silent	0.000406833	ACSL6	POLG Intron	0.000651287	POLG
668	SLC34A2 Non_Silent	0.000522411	SLC34A2	TMEM127 Non_Silent	0.000405246	TMEM127	29944118-29944118-chr6-Splice_Region-SNP-T-T-A	0.000650875	HLA-A
669	POLD1 Intron	0.000521951	POLD1	106432991-106432991-chr2-Missense_Mutation-SNP-C-C-T	0.000404934	RGPD3	SMARCD1 Intron	0.000646177	SMARCD1
670	AFF1 Intron	0.000521897	AFF1	LMNA Non_Silent	0.000403172	LMNA	DCC Intron	0.000646066	DCC
671	PDGFRA Non_Silent	0.000521864	PDGFRA	8985600-8985602-chr3-In_Frame_Del-DEL-GCT-GCT--	0.000403086	SRGAP3	EPHA3 Intron	0.000644686	EPHA3
672	13988635-13988635-chr7-Intron-SNP-C-C-A	0.000521777	ETV1	CHD4 Non_Silent	0.00039982	CHD4	ITK Intron	0.000641488	ITK
673	100709481-100709481-chr8-Missense_Mutation-SNP-T-T-A	0.000521708	PABPC1	106423256-106423256-chr2-Missense_Mutation-SNP-C-C-T	0.000399277	RGPD3	36292552-36292552-chr1-Intron-SNP-G-G-T	0.000641429	THRAP3
674	9688140-9688142-chrX-In_Frame_Del-DEL-GCG-GCG--	0.000521514	TBL1X	P2RY8 Non_Silent	0.000393331	P2RY8	SYK Intron	0.000639837	SYK
675	100709214-100709214-chr8-Missense_Mutation-SNP-G-G-A	0.000521091	PABPC1	ISX Non_Silent	0.000393331	ISX	PRDM16 Intron	0.000639242	PRDM16
676	BTK Intron	0.000520987	BTK	26773858-26773858-chr1-Missense_Mutation-SNP-T-T-C	0.000393331	ARID1A	DNM2 Intron	0.00063858	DNM2
677	154366306-154366306-chrX-Splice_Site-SNP-A-A-C	0.000520143	FLNA	MAPK1 Non_Silent	0.000393331	MAPK1	140950482-140950484-chr2-Intron-DEL-TGT-TGT--	0.000637826	LRP1B
678	152238768-152238768-chr7-Missense_Mutation-SNP-T-T-C	0.000519755	KMT2C	195788578-195788578-chr3-Missense_Mutation-SNP-A-A-T	0.000393331	MUC4	CAMTA1 Intron	0.000637517	CAMTA1
679	HOXA13 Non_Silent	0.000519245	HOXA13	8851321-8851321-chr19-Missense_Mutation-SNP-C-C-A	0.000393331	MUC16	TFG Intron	0.000635579	TFG
680	ZMYM3 Intron	0.000518235	ZMYM3	195784834-195784834-chr3-Missense_Mutation-SNP-G-G-A	0.000393331	MUC4	ERCC2 Intron	0.000629952	ERCC2
681	C5 Non_Silent	0.000517567	C5	RPL22 Non_Silent	0.000393331	RPL22	GATA2 Intron	0.000629378	GATA2
682	21040898-21040899-chr2-Intron-DEL-AC-AC--	0.000517126	APOB	157009833-157009835-chr7-In_Frame_Del-DEL-GCC-GCC--	0.000393331	MNX1	XPO1 Intron	0.000629351	XPO1
683	207052260-207052260-chr1-5'Flank-DEL-T-T--	0.000516384	YOD1	8908929-8908930-chr19-In_Frame_Ins-INS-----TGG	0.000393331	MUC16	KRAS Intron	0.000628425	KRAS
684	ROS1 Synonymous	0.000516379	ROS1	ALB Non_Silent	0.000393331	ALB	MLF1 Intron	0.00062739	MLF1
685	SFPQ Intron	0.000516359	SFPQ	FANCG Non_Silent	0.000393331	FANCG	157243604-157243605-chr5-Intron-DEL-CT-CT--	0.000626154	ITK
686	KRAS Intron	0.000516155	KRAS	27199463-27199465-chr7-In_Frame_Del-DEL-GGC-GGC--	0.000393331	HOXA13	EBF1 Intron	0.000625035	EBF1
687	86268595-86268600-chr11-Intron-DEL-GTGTGT-GTGTGT--	0.000516047	EED	13782254-13782254-chr1-Frame_Shift_Del-DEL-A-A--	0.000393331	PRDM2	21040898-21040899-chr2-Intron-DEL-AC-AC--	0.000622425	APOB
688	NTRK3 Non_Silent	0.000515327	NTRK3	167966012-167966014-chr6-In_Frame_Del-DEL-GAG-GAG--	0.000393331	MLLT4	ROBO2 Intron	0.000619931	ROBO2
689	SPEN Non_Silent	0.000513731	SPEN	57175939-57175939-chr12-Missense_Mutation-SNP-A-A-C	0.000393331	LRP1	MALT1 Intron	0.000619517	MALT1
690	HLF Non_Silent	0.000513201	HLF	HOXD13 Non_Silent	0.000393331	HOXD13	TRAF7 Intron	0.000616883	TRAF7
691	92883319-92883319-chr11-Missense_Mutation-SNP-A-A-C	0.000513012	FAT3	8896088-8896088-chr19-Missense_Mutation-SNP-T-T-A	0.000393331	MUC16	8896129-8896129-chr19-Intron-SNP-T-T-C	0.000616527	MUC16
692	SKI Intron	0.000512848	SKI	56093064-56093064-chr12-Missense_Mutation-SNP-G-G-A	0.000393331	ERBB3	154366306-154366306-chrX-Splice_Site-SNP-A-A-C	0.000614368	FLNA
693	33013233-33013233-chr1-Missense_Mutation-SNP-A-A-G	0.000512698	AK2	29942825-29942825-chr6-Missense_Mutation-SNP-G-G-A	0.000393331	HLA-A	RUNX1 Intron	0.000609876	RUNX1
694	TFEB Intron	0.000512557	TFEB	OMD Non_Silent	0.000393331	OMD	CHD2 Intron	0.000609771	CHD2
695	FGFR3 Intron	0.00051217	FGFR3	PIM1 Non_Silent	0.000393331	PIM1	EXT1 Intron	0.00060879	EXT1
696	DDX3X Non_Silent	0.000511969	DDX3X	8965528-8965528-chr19-Missense_Mutation-SNP-T-T-G	0.000393331	MUC16	MSI2 Intron	0.000608431	MSI2
697	EPHA7 Intron	0.000511661	EPHA7	122474147-122474147-chr12-Missense_Mutation-SNP-T-T-G	0.000393331	ZCCHC8	C3 Intron	0.000605355	C3
698	157206300-157206300-chr6-Missense_Mutation-SNP-A-A-C	0.00051156	ARID1B	RECQL Non_Silent	0.000393331	RECQL	1804286-1804287-chr4-Intron-DEL-GG-GG--	0.000602573	FGFR3
699	CTNND2 Intron	0.000511298	CTNND2	152229931-152229931-chr7-Missense_Mutation-SNP-T-T-C	0.000393331	KMT2C	UBR5 Intron	0.000601863	UBR5
700	153270364-153270364-chr4-5'UTR-SNP-C-C-A	0.000511207	TRIM2	195786898-195786898-chr3-Missense_Mutation-SNP-A-A-G	0.000393331	MUC4	KMT2D Intron	0.000601826	KMT2D
701	29944132-29944132-chr6-Synonymous-SNP-G-G-A	0.000511049	HLA-A	SH2B3 Non_Silent	0.000393331	SH2B3	105240988-105240988-chr4-Intron-DEL-T-T--	0.000601032	TET2
702	1915344-1915344-chr20-Missense_Mutation-SNP-G-G-A	0.000510427	SIRPA	BCL2 Non_Silent	0.000393331	BCL2	WRN Intron	0.00059867	WRN
703	5135264-5135264-chr17-Synonymous-SNP-C-C-A	0.000510406	USP6	FLI1 Non_Silent	0.000393331	FLI1	RAD21 Intron	0.000596599	RAD21
704	GATA2 Non_Silent	0.000510353	GATA2	TPM4 Non_Silent	0.000393331	TPM4	133095294-133095294-chr8-Intron-SNP-A-A-C	0.000595135	TG
705	50492857-50492857-chr15-Synonymous-SNP-C-C-T	0.000510245	USP8	102277121-102277121-chr8-Frame_Shift_Del-DEL-T-T--	0.000393331	UBR5	77445526-77445527-chr17-Intron-DEL-GT-GT--	0.000594508	SEPT9
706	JAK3 Synonymous	0.000510235	JAK3	SEPT9 Non_Silent	0.000393331	SEPT9	47062372-47062374-chr3-Intron-DEL-TTT-TTT--	0.000594275	SETD2
707	NOTCH2 Non_Silent	0.000510089	NOTCH2	AKT1 Non_Silent	0.000393331	AKT1	AKAP9 Intron	0.000593945	AKAP9
708	AMT Intron	0.000509611	AMT	113165703-113165703-chr10-Missense_Mutation-SNP-A-A-C	0.000393331	TCF7L2	AKT3 Intron	0.000592069	AKT3
709	IRF4 UTR	0.000509518	IRF4	CCR7 Non_Silent	0.000393331	CCR7	MECOM Intron	0.000591311	MECOM
710	31451646-31451646-chr5-Splice_Region-DEL-A-A--	0.000509186	DROSHA	BCL11A Non_Silent	0.000393331	BCL11A	FBL Intron	0.000590733	FBL
711	41933693-41933693-chr8-Nonsense_Mutation-SNP-G-G-T	0.00050862	KAT6A	95458142-95458142-chr9-Nonsense_Mutation-SNP-G-G-T	0.000393331	PTCH1	ZNRF3 Intron	0.000590061	ZNRF3
712	116945035-116945035-chr10-Intron-DEL-A-A--	0.000508494	KIAA1598	147926117-147926117-chr2-Frame_Shift_Del-DEL-A-A--	0.000393331	ACVR2A	8896098-8896098-chr19-Splice_Region-SNP-G-G-A	0.000584704	MUC16
713	SIRPA Non_Silent	0.00050836	SIRPA	HOOK3 Non_Silent	0.000393331	HOOK3	256235-256235-chr5-Intron-SNP-A-A-G	0.000583193	SDHA
714	STIL Non_Silent	0.000506884	STIL	44253108-44253108-chr6-Missense_Mutation-SNP-A-A-G	0.000393331	HSP90AB1	RGPD3 Intron	0.000581162	RGPD3
715	ARHGEF12 Intron	0.00050625	ARHGEF12	50492819-50492819-chr15-Missense_Mutation-SNP-A-A-G	0.000393331	USP8	FUBP1 Intron	0.000581092	FUBP1
716	2561636-2561636-chr1-Intron-SNP-A-A-C	0.000506175	TNFRSF14	56882022-56882024-chr5-In_Frame_Del-DEL-CAA-CAA--	0.00039333	MAP3K1	17841830-17841830-chr19-Intron-SNP-A-A-C	0.000580938	JAK3
717	50492761-50492761-chr15-Synonymous-SNP-C-C-A	0.000505678	USP8	47845693-47845693-chr18-Missense_Mutation-SNP-G-G-C	0.000393242	SMAD2	REL Intron	0.0005803	REL
718	ATIC Intron	0.000505625	ATIC	27095698-27095700-chr7-In_Frame_Del-DEL-TGG-TGG--	0.000393093	HOXA1	TRRAP Intron	0.000576445	TRRAP
719	127289368-127289370-chr2-In_Frame_Del-DEL-TCT-TCT--	0.000505171	ERCC3	ZFHX3 Non_Silent	0.000392574	ZFHX3	TPM3 Intron	0.000575627	TPM3
720	72788520-72788520-chr16-Missense_Mutation-SNP-T-T-G	0.00050489	ZFHX3	72788520-72788520-chr16-Missense_Mutation-SNP-T-T-G	0.000388197	ZFHX3	KDM5A Intron	0.000572414	KDM5A
721	SIRPA Intron	0.000504822	SIRPA	FNBP1 Non_Silent	0.000387932	FNBP1	39240895-39240898-chr22-Intron-DEL-TCTC-TCTC--	0.00057129	PDGFB
722	PRDM2 Intron	0.000504768	PRDM2	MAP2 Non_Silent	0.000387226	MAP2	10047709-10047709-chr3-Intron-SNP-T-T-A	0.00057004	FANCD2
723	33013277-33013277-chr1-Synonymous-SNP-G-G-A	0.000504418	AK2	PAX8 Non_Silent	0.000387012	PAX8	FLNA Intron	0.000569678	FLNA
724	38428396-38428398-chr8-In_Frame_Del-DEL-TCA-TCA--	0.000504288	FGFR1	51058424-51058424-chr18-Missense_Mutation-SNP-A-A-C	0.000386633	SMAD4	ZFHX3 Intron	0.000567379	ZFHX3
725	GNAQ Non_Silent	0.000504064	GNAQ	236513-236513-chr5-Missense_Mutation-SNP-C-C-T	0.000386504	SDHA	102201324-102201324-chr7-Intron-SNP-G-G-C	0.00056624	CUX1
726	IDH2 Intron	0.000503582	IDH2	72788665-72788667-chr16-In_Frame_Del-DEL-TGC-TGC--	0.000386223	ZFHX3	RDM1 Intron	0.000565817	RDM1
727	TLX3 Non_Silent	0.00050348	TLX3	AFF4 Non_Silent	0.000382191	AFF4	TLX1 Intron	0.000562568	TLX1
728	C2 Non_Silent	0.000502642	C2	CHST1 Non_Silent	0.000381266	CHST1	DCAF12 Intron	0.000561324	DCAF12
729	100705604-100705604-chr8-Missense_Mutation-SNP-G-G-C	0.000502419	PABPC1	53722394-53722394-chr3-Missense_Mutation-SNP-T-T-G	0.000379443	CACNA1D	ATR Intron	0.000561184	ATR
730	50492793-50492793-chr15-Missense_Mutation-SNP-T-T-C	0.000501738	USP8	ARC Non_Silent	0.000378347	ARC	MLLT10 Intron	0.00056112	MLLT10
731	211624104-211624105-chr2-Intron-DEL-TC-TC--	0.000501736	ERBB4	LZTR1 Non_Silent	0.000378347	LZTR1	149185102-149185104-chr3-Intron-DEL-TTG-TTG--	0.000559098	CP
732	209696505-209696507-chr2-Intron-DEL-TGT-TGT--	0.000501589	MAP2	29193329-29193329-chr2-Nonsense_Mutation-SNP-G-G-T	0.000378347	ALK	ERCC4 Intron	0.000557746	ERCC4
733	UBR5 Intron	0.000501576	UBR5	167875361-167875361-chr6-Missense_Mutation-SNP-T-T-G	0.000378347	MLLT4	CCDC6 Intron	0.000555753	CCDC6
734	FAM135B Intron	0.000501427	FAM135B	42106897-42106897-chr20-Missense_Mutation-SNP-G-G-C	0.000378347	PTPRT	ECT2L Intron	0.000555511	ECT2L
735	FCRL4 Intron	0.000501308	FCRL4	RIN2 Non_Silent	0.000378347	RIN2	207564326-207564327-chr1-Intron-DEL-AC-AC--	0.000555302	CR1
736	195784271-195784271-chr3-Missense_Mutation-SNP-T-T-C	0.000501126	MUC4	RALGDS Non_Silent	0.000378347	RALGDS	EPAS1 Intron	0.000554438	EPAS1
737	WWP2 Non_Silent	0.000501018	WWP2	71140739-71140741-chrX-In_Frame_Del-DEL-AGC-AGC--	0.000378347	MED12	TSC1 Intron	0.000553417	TSC1
738	51391469-51391470-chr20-Intron-INS-----G	0.000500924	NFATC2	PBX1 Non_Silent	0.000378347	PBX1	FH Intron	0.000551702	FH
739	PIK3R1 Non_Silent	0.000500588	PIK3R1	92082604-92082604-chr7-Missense_Mutation-SNP-C-C-A	0.000378347	AKAP9	158787210-158787211-chr6-Splice_Region-DEL-GA-GA--	0.0005494	EZR
740	HNF1A Intron	0.000500538	HNF1A	32975191-32975192-chr7-Frame_Shift_Ins-INS-----C	0.000378347	FKBP9	152265211-152265211-chr7-Splice_Site-SNP-T-T-C	0.000547809	KMT2C
741	102404597-102404597-chr10-Missense_Mutation-SNP-T-T-G	0.000499753	PSD	77693579-77693579-chr11-Nonsense_Mutation-SNP-G-G-T	0.000378347	RSF1	CD27 Intron	0.000545858	CD27
742	58976313-58976314-chr5-Intron-DEL-AC-AC--	0.000499291	PDE4D	166165765-166165765-chr6-Missense_Mutation-SNP-T-T-G	0.000378347	T	TAF15 Intron	0.000544956	TAF15
743	TFE3 Non_Silent	0.000499071	TFE3	49030440-49030441-chrX-Frame_Shift_Ins-INS-----C	0.000378347	TFE3	TOP1 Intron	0.000542077	TOP1
744	102084824-102084826-chr14-In_Frame_Del-DEL-TCT-TCT--	0.000499056	HSP90AA1	91986174-91986174-chr8-Missense_Mutation-SNP-C-C-G	0.000378347	RUNX1T1	PALB2 Intron	0.000539665	PALB2
745	100709671-100709671-chr8-Nonsense_Mutation-SNP-C-C-A	0.000498193	PABPC1	BRIP1 Non_Silent	0.000378347	BRIP1	5135309-5135309-chr17-Intron-SNP-C-C-T	0.000538371	USP6
746	LCK Non_Silent	0.00049711	LCK	179109268-179109269-chr1-Frame_Shift_Ins-INS-----G	0.000378347	ABL2	MSH6 Intron	0.000536971	MSH6
747	125415028-125415028-chr4-Missense_Mutation-SNP-A-A-C	0.000496889	FAT4	IDH2 Non_Silent	0.000378347	IDH2	FAM131B Intron	0.000533308	FAM131B
748	162775794-162775794-chr1-Missense_Mutation-SNP-T-T-C	0.000495502	DDR2	102336157-102336157-chr11-Missense_Mutation-SNP-G-G-C	0.000378347	BIRC3	6843048-6843051-chr19-Intron-DEL-TGAA-TGAA--	0.000532559	VAV1
749	SDHC Intron	0.000495373	SDHC	NUTM2A Non_Silent	0.000378347	NUTM2A	PAX3 Intron	0.000531256	PAX3
750	EZR Intron	0.000494033	EZR	THRA Non_Silent	0.000378347	THRA	10048144-10048144-chr3-Intron-SNP-G-G-A	0.000529593	FANCD2
751	ERCC3 Non_Silent	0.000493606	ERCC3	ABI1 Non_Silent	0.000378347	ABI1	PAX5 Intron	0.000529513	PAX5
752	EZH2 Intron	0.000492347	EZH2	7673776-7673776-chr17-Missense_Mutation-SNP-G-G-A	0.000378347	TP53	SGK1 Intron	0.000527343	SGK1
753	117624727-117624727-chr1-3'UTR-DEL-A-A--	0.000492025	FAM46C	32332965-32332965-chr13-Missense_Mutation-SNP-C-C-T	0.000378347	BRCA2	31361053-31361053-chr10-Intron-SNP-C-C-A	0.000526837	ZEB1
754	BRD3 Synonymous	0.000491606	BRD3	LMO2 Non_Silent	0.000378347	LMO2	29943667-29943667-chr6-Intron-SNP-G-G-A	0.00052646	HLA-A
755	RSF1 Intron	0.000491232	RSF1	124859111-124859111-chr7-Missense_Mutation-SNP-A-A-C	0.000378347	POT1	CTNNB1 Intron	0.000525779	CTNNB1
756	ETNK1 Non_Silent	0.00049093	ETNK1	1615813-1615813-chr19-Missense_Mutation-SNP-G-G-C	0.000378347	TCF3	MAML2 Intron	0.000525653	MAML2
757	9764976-9764978-chr16-Intron-DEL-CAG-CAG--	0.000490752	GRIN2A	40632217-40632217-chr17-Missense_Mutation-SNP-A-A-C	0.000378347	SMARCE1	PBX1 Intron	0.000523871	PBX1
758	LIFR Intron	0.000490225	LIFR	ACVR1 Non_Silent	0.000378347	ACVR1	SMC1A Intron	0.000518942	SMC1A
759	TNN Intron	0.00048975	TNN	100709201-100709201-chr8-Missense_Mutation-SNP-T-T-G	0.000378347	PABPC1	106098682-106098682-chr6-Intron-SNP-T-T-G	0.000517084	PRDM1
760	256547-256547-chr5-3'UTR-SNP-A-A-G	0.000488943	SDHA	147620640-147620640-chr1-Missense_Mutation-SNP-A-A-C	0.000378347	BCL9	CCNB1IP1 Intron	0.000512153	CCNB1IP1
761	152273921-152273921-chr7-Intron-SNP-C-C-T	0.000488161	KMT2C	28987137-28987137-chr22-Missense_Mutation-SNP-T-T-G	0.000378347	ZNRF3	23263153-23263155-chr22-Intron-DEL-GGA-GGA--	0.000510205	BCR
762	CTNNA2 Intron	0.000487543	CTNNA2	72013739-72013739-chr11-Missense_Mutation-SNP-A-A-C	0.000378347	NUMA1	2945756-2945757-chr7-Intron-DEL-AC-AC--	0.000509971	CARD11
763	REL Intron	0.000487148	REL	10903835-10903835-chr16-Missense_Mutation-SNP-T-T-C	0.000378347	CIITA	CTNNA2 Intron	0.00050857	CTNNA2
764	36923307-36923308-chr9-Intron-DEL-TC-TC--	0.0004868	PAX5	ARHGEF1 Non_Silent	0.000378347	ARHGEF1	108841299-108841299-chr11-Intron-DEL-T-T--	0.000499478	DDX10
765	KDM5C Intron	0.000486151	KDM5C	186602115-186602115-chr2-Missense_Mutation-SNP-A-A-C	0.000375886	ITGAV	NONO Intron	0.000499215	NONO
766	100702966-100702966-chr8-3'UTR-SNP-G-G-A	0.000485758	PABPC1	119997159-119997159-chr1-Missense_Mutation-SNP-T-T-G	0.000374687	NOTCH2	3777668-3777673-chr16-Intron-DEL-AAAACA-AAAACA--	0.000499074	CREBBP
767	56718447-56718447-chr12-Intron-SNP-A-A-G	0.000484221	NACA	100717815-100717815-chr8-Missense_Mutation-SNP-G-G-C	0.000374687	PABPC1	RAF1 Intron	0.000498767	RAF1
768	SPEN Synonymous	0.000483928	SPEN	PDCD1LG2 Non_Silent	0.000374687	PDCD1LG2	CYP2C8 Intron	0.000498293	CYP2C8
769	KIF5B Intron	0.000483806	KIF5B	MSH2 Non_Silent	0.000374687	MSH2	66760670-66760670-chr14-Intron-SNP-C-C-T	0.000496126	GPHN
770	ARHGAP5 Non_Silent	0.000483481	ARHGAP5	214780609-214780609-chr2-Missense_Mutation-SNP-A-A-C	0.000374687	BARD1	TCF7 Intron	0.000495943	TCF7
771	HR Intron	0.000482142	HR	THRAP3 Non_Silent	0.000374687	THRAP3	5130313-5130313-chr17-Intron-SNP-T-T-G	0.000495772	USP6
772	ALDH2 Intron	0.000481961	ALDH2	HERPUD1 Non_Silent	0.000374687	HERPUD1	PSIP1 Intron	0.000492704	PSIP1
773	PRKCB Intron	0.000481407	PRKCB	22643801-22643801-chr12-Missense_Mutation-SNP-T-T-G	0.000374687	ETNK1	87228974-87228974-chr10-Intron-SNP-C-C-G	0.000492339	NUTM2A
774	BCL9 Non_Silent	0.000481317	BCL9	195785371-195785371-chr3-Missense_Mutation-SNP-G-G-A	0.000374687	MUC4	28689281-28689281-chr22-Intron-SNP-C-C-G	0.000492254	CHEK2
775	PSD Synonymous	0.000481147	PSD	122473667-122473667-chr12-Missense_Mutation-SNP-T-T-G	0.000374687	ZCCHC8	DCD Intron	0.000491137	DCD
776	15741860-15741860-chr16-Missense_Mutation-SNP-T-T-C	0.000480774	MYH11	SMARCE1 Non_Silent	0.000374687	SMARCE1	GMPS Intron	0.000490626	GMPS
777	TBP Intron	0.00047983	TBP	NAB2 Non_Silent	0.000374687	NAB2	MKL1 Intron	0.000489963	MKL1
778	PPP6C UTR	0.000479827	PPP6C	179218294-179218294-chr3-Missense_Mutation-SNP-G-G-A	0.000374687	PIK3CA	SMARCB1 Intron	0.000488586	SMARCB1
779	8897653-8897653-chr19-Missense_Mutation-SNP-C-C-G	0.00047916	MUC16	152177504-152177504-chr7-Missense_Mutation-SNP-T-T-G	0.000374687	KMT2C	31361084-31361084-chr10-Intron-SNP-T-T-C	0.0004834	ZEB1
780	DCTN1 Intron	0.000477715	DCTN1	NBN Non_Silent	0.000374687	NBN	HMGN2 Intron	0.000483225	HMGN2
781	PRDM2 Non_Silent	0.000477146	PRDM2	195783223-195783223-chr3-Missense_Mutation-SNP-T-T-G	0.000374687	MUC4	6581021-6581024-chr12-Intron-DEL-AAAA-AAAA--	0.000483065	CHD4
782	31189856-31189856-chr16-Intron-SNP-C-C-A	0.00047642	FUS	100717782-100717782-chr8-Missense_Mutation-SNP-T-T-C	0.000374687	PABPC1	CD274 Intron	0.000482304	CD274
783	MECOM Non_Silent	0.000475966	MECOM	CBFA2T3 Non_Silent	0.000374687	CBFA2T3	KAT6A Intron	0.000480672	KAT6A
784	BCL6 Non_Silent	0.0004749	BCL6	177135616-177135616-chr5-Missense_Mutation-SNP-A-A-C	0.000374687	NSD1	SEPT6 Intron	0.000479417	SEPT6
785	MED12 Non_Silent	0.000474291	MED12	119206523-119206525-chr11-In_Frame_Del-DEL-CAC-CAC--	0.000374687	CBL	2173871-2173871-chr16-Intron-SNP-T-T-C	0.000478851	TRAF7
786	ALB Intron	0.000473964	ALB	OTC Non_Silent	0.000374687	OTC	1918126-1918126-chr4-Intron-DEL-T-T--	0.000478567	WHSC1
787	KIT Non_Silent	0.000473255	KIT	25246055-25246055-chr2-Missense_Mutation-SNP-A-A-C	0.000374687	DNMT3A	47224248-47224249-chr1-Intron-DEL-AC-AC--	0.000477949	TAL1
788	100709499-100709499-chr8-Missense_Mutation-SNP-G-G-A	0.000473009	PABPC1	31520904-31520905-chr10-Frame_Shift_Ins-INS-----G	0.000374687	ZEB1	VTI1A Intron	0.000471368	VTI1A
789	ZFHX3 Intron	0.000472992	ZFHX3	114713908-114713908-chr1-Missense_Mutation-SNP-T-T-C	0.000374687	NRAS	MAP3K13 Intron	0.000468699	MAP3K13
790	STAG1 Intron	0.000472821	STAG1	STAT3 Non_Silent	0.000374687	STAT3	50194109-50194109-chr17-Intron-SNP-T-T-G	0.000468439	COL1A1
791	SEPT9 Intron	0.000472716	SEPT9	TOP1 Non_Silent	0.000374687	TOP1	BRAF Intron	0.000467119	BRAF
792	152265049-152265049-chr7-Nonsense_Mutation-SNP-G-G-T	0.000472531	KMT2C	MUTYH Non_Silent	0.000374687	MUTYH	PPP2R1A Intron	0.000462826	PPP2R1A
793	8876673-8876674-chr19-Intron-DEL-AG-AG--	0.000472094	MUC16	134171128-134171128-chr6-Missense_Mutation-SNP-G-G-T	0.000374687	SGK1	CCNE1 Intron	0.000462588	CCNE1
794	152235860-152235860-chr7-Missense_Mutation-SNP-C-C-T	0.000471985	KMT2C	195788447-195788447-chr3-Missense_Mutation-SNP-T-T-C	0.000374687	MUC4	FAM46C Intron	0.000460354	FAM46C
795	FANCA Non_Silent	0.000471652	FANCA	EBF1 Non_Silent	0.000374687	EBF1	149181991-149181991-chr3-Intron-SNP-G-G-C	0.000460288	CP
796	KDR Non_Silent	0.000470744	KDR	195785335-195785335-chr3-Missense_Mutation-SNP-A-A-G	0.000374687	MUC4	OXR1 Intron	0.000459523	OXR1
797	1260401-1260402-chr5-Intron-DEL-CA-CA--	0.000470522	TERT	175077488-175077488-chr1-Missense_Mutation-SNP-G-G-C	0.000374687	TNN	DICER1 Intron	0.000458382	DICER1
798	CASC5 Intron	0.000470496	CASC5	PAX5 Non_Silent	0.000374687	PAX5	FOXA1 Intron	0.000456781	FOXA1
799	150813259-150813259-chr1-Synonymous-SNP-G-G-C	0.00046989	ARNT	162780126-162780126-chr1-Missense_Mutation-SNP-A-A-C	0.000374687	DDR2	ZNF19 Intron	0.000455174	ZNF19
800	29943667-29943667-chr6-Intron-SNP-G-G-A	0.000469609	HLA-A	NFE2 Non_Silent	0.000374687	NFE2	ZCCHC8 Intron	0.000452253	ZCCHC8
801	ELN Non_Silent	0.000469361	ELN	POU2AF1 Non_Silent	0.000374687	POU2AF1	89327120-89327120-chr15-Intron-SNP-A-A-C	0.000452022	POLG
802	132897169-132897169-chr5-Synonymous-SNP-T-T-G	0.00046935	AFF4	ZNF19 Non_Silent	0.000374687	ZNF19	209696357-209696359-chr2-Splice_Region-DEL-ATT-ATT--	0.000447743	MAP2
803	GNAQ Intron	0.000469245	GNAQ	DCT Non_Silent	0.000374687	DCT	FSTL3 Intron	0.000446504	FSTL3
804	100712775-100712775-chr8-Missense_Mutation-SNP-C-C-A	0.000468149	PABPC1	ARAF Non_Silent	0.000374687	ARAF	TEC Intron	0.000446363	TEC
805	50809907-50809909-chr10-In_Frame_Del-DEL-AGC-AGC--	0.000467929	A1CF	53382399-53382399-chr12-Missense_Mutation-SNP-C-C-G	0.000374687	SP1	29945119-29945119-chr6-Intron-SNP-G-G-A	0.000444752	HLA-A
806	ACVR2A Non_Silent	0.000467845	ACVR2A	IRF4 Non_Silent	0.000374687	IRF4	2945728-2945733-chr7-Intron-DEL-ACACAC-ACACAC--	0.000443927	CARD11
807	PCM1 Non_Silent	0.000465703	PCM1	SMARCB1 Non_Silent	0.000374687	SMARCB1	FAS Intron	0.000442987	FAS
808	HOXA1 Non_Silent	0.000465184	HOXA1	37020771-37020772-chr9-Frame_Shift_Ins-INS-----C	0.000374687	PAX5	31181818-31181818-chr17-Intron-SNP-G-G-T	0.000442552	NF1
809	10902097-10902097-chr16-Missense_Mutation-SNP-A-A-C	0.000464141	CIITA	FGFR4 Non_Silent	0.000374687	FGFR4	RARA Intron	0.000442391	RARA
810	SGK1 Intron	0.000463582	SGK1	93258225-93258228-chr6-Frame_Shift_Del-DEL-CTGC-CTGC--	0.000374687	EPHA7	MUC1 Intron	0.000440742	MUC1
811	MAML2 Non_Silent	0.000463054	MAML2	8935035-8935035-chr19-Missense_Mutation-SNP-C-C-T	0.000374687	MUC16	ACVR2A Intron	0.000438576	ACVR2A
812	BUB1 Intron	0.000462451	BUB1	1915338-1915338-chr20-Missense_Mutation-SNP-C-C-A	0.000371487	SIRPA	TK1 Intron	0.000438181	TK1
813	MLH1 Intron	0.000462306	MLH1	FANCC Non_Silent	0.000368046	FANCC	198722350-198722351-chr1-Intron-DEL-AT-AT--	0.000435291	PTPRC
814	BCL11B Non_Silent	0.000460461	BCL11B	49033483-49033485-chr12-In_Frame_Del-DEL-TGC-TGC--	0.000366434	KMT2D	GNAS Intron	0.000434737	GNAS
815	NACA Intron	0.000460315	NACA	46382061-46382061-chr2-Missense_Mutation-SNP-C-C-A	0.000357463	EPAS1	71387250-71387250-chrX-Intron-SNP-A-A-T	0.000433122	TAF1
816	NFIB UTR	0.0004596	NFIB	ECT2L Non_Silent	0.000357463	ECT2L	152264970-152264970-chr7-Intron-SNP-C-C-T	0.000432341	KMT2C
817	LPP Intron	0.000458809	LPP	F2 Non_Silent	0.000357463	F2	ALB Intron	0.000432018	ALB
818	15267329-15267329-chr19-Intron-SNP-T-T-C	0.000458575	BRD4	FAH Non_Silent	0.000357463	FAH	10047675-10047675-chr3-Intron-SNP-G-G-A	0.000427957	FANCD2
819	27437573-27437573-chr16-Missense_Mutation-SNP-A-A-C	0.000458524	IL21R	IKBKB Non_Silent	0.000357463	IKBKB	CIITA Intron	0.000427021	CIITA
820	133095294-133095294-chr8-Intron-SNP-A-A-C	0.000458425	TG	VHL Non_Silent	0.000357463	VHL	75559719-75559719-chr7-Intron-SNP-A-A-C	0.000424565	HIP1
821	8896139-8896139-chr19-Intron-SNP-T-T-A	0.000458025	MUC16	CREB3L1 Non_Silent	0.000357463	CREB3L1	SDHB Intron	0.000423955	SDHB
822	195786309-195786309-chr3-Missense_Mutation-SNP-C-C-G	0.000457565	MUC4	NUTM1 Non_Silent	0.000357463	NUTM1	IRF4 Intron	0.00042314	IRF4
823	NIN Intron	0.000454216	NIN	40420883-40420885-chr22-In_Frame_Del-DEL-TGC-TGC--	0.000357463	MKL1	F2 Intron	0.000423012	F2
824	ELF3 Non_Silent	0.000453855	ELF3	FGFR1OP Non_Silent	0.000357463	FGFR1OP	PRCC Intron	0.000420519	PRCC
825	41708668-41708669-chr8-Intron-DEL-AC-AC--	0.000453661	ANK1	DCAF12 Non_Silent	0.000357463	DCAF12	ACVR1 Intron	0.000414831	ACVR1
826	PDGFRB Intron	0.000453279	PDGFRB	MITF Non_Silent	0.000357463	MITF	NF2 Intron	0.000414221	NF2
827	ETV6 Intron	0.000453121	ETV6	KIAA1598 Non_Silent	0.000357463	KIAA1598	10048168-10048168-chr3-Intron-SNP-A-A-G	0.000413917	FANCD2
828	PRPF40B Intron	0.000453016	PRPF40B	5549463-5549463-chr9-Missense_Mutation-SNP-A-A-C	0.000357463	PDCD1LG2	8907564-8907565-chr19-Intron-DEL-GT-GT--	0.000404793	MUC16
829	CAMTA1 UTR	0.000452928	CAMTA1	GRM3 Non_Silent	0.000357463	GRM3	PDCD1LG2 Intron	0.00040442	PDCD1LG2
830	MYH1 Intron	0.000452768	MYH1	129900006-129900006-chr9-Missense_Mutation-SNP-A-A-G	0.000357463	FNBP1	NCOA4 Intron	0.000401612	NCOA4
831	C6 Intron	0.000451527	C6	NTRK3 Non_Silent	0.000357463	NTRK3	90874867-90874867-chr9-Intron-SNP-A-A-C	0.000400694	SYK
832	39240940-39240945-chr22-Intron-DEL-CACTCT-CACTCT--	0.00045121	PDGFB	PTPRC Non_Silent	0.000357463	PTPRC	FOXP1 Intron	0.000400102	FOXP1
833	52648314-52648316-chr3-Intron-DEL-AAC-AAC--	0.00045112	PBRM1	13778600-13778602-chr1-In_Frame_Del-DEL-GAG-GAG--	0.000357463	PRDM2	CD74 Intron	0.000397072	CD74
834	256235-256235-chr5-Intron-SNP-A-A-G	0.000450975	SDHA	PMS2 Non_Silent	0.000357463	PMS2	BRCA2 Intron	0.000395071	BRCA2
835	100715568-100715568-chr8-Synonymous-SNP-T-T-C	0.000448347	PABPC1	EN1 Non_Silent	0.000357463	EN1	49633381-49633381-chr12-Intron-SNP-A-A-G	0.000394425	PRPF40B
836	152265172-152265172-chr7-Synonymous-SNP-C-C-T	0.000448321	KMT2C	29942949-29942949-chr6-Missense_Mutation-SNP-G-G-A	0.000357463	HLA-A	41125856-41125856-chr22-Splice_Region-SNP-A-A-T	0.000394252	EP300
837	SMARCA4 Non_Silent	0.000448242	SMARCA4	PDE4D Non_Silent	0.000357463	PDE4D	ZMYM3 Intron	0.000393922	ZMYM3
838	PRDM1 Intron	0.000447828	PRDM1	25768772-25768772-chr2-Missense_Mutation-SNP-C-C-G	0.000357463	ASXL2	167962325-167962326-chr6-Intron-DEL-TG-TG--	0.000391846	MLLT4
839	PDGFB Intron	0.000445878	PDGFB	IL6ST Non_Silent	0.000357463	IL6ST	MN1 Intron	0.000389911	MN1
840	PLAG1 Non_Silent	0.000445664	PLAG1	SP1 Non_Silent	0.000357463	SP1	HRAS Intron	0.000388028	HRAS
841	DCT Non_Silent	0.000445194	DCT	49417699-49417699-chr3-Missense_Mutation-SNP-G-G-C	0.000357463	AMT	149181997-149182003-chr3-Splice_Site-DEL-GTGAGTA-GTGAGTA--	0.000387846	CP
842	AFF4 UTR	0.000444671	AFF4	195784402-195784402-chr3-Missense_Mutation-SNP-G-G-A	0.000357463	MUC4	FNBP1 Intron	0.000387805	FNBP1
843	NAB2 Intron	0.000444218	NAB2	6600591-6600591-chr12-Missense_Mutation-SNP-T-T-G	0.000357463	CHD4	MYOD1 Intron	0.000386532	MYOD1
844	96254043-96254045-chr2-In_Frame_Del-DEL-TGC-TGC--	0.000444215	TMEM127	195780215-195780215-chr3-Missense_Mutation-SNP-C-C-G	0.000357463	MUC4	29944059-29944059-chr6-Intron-SNP-C-C-T	0.000384685	HLA-A
845	SUFU Intron	0.000444173	SUFU	37025923-37025923-chr3-Missense_Mutation-SNP-C-C-G	0.000357463	MLH1	SKI Intron	0.000382315	SKI
846	TRIM3 Intron	0.000443755	TRIM3	41746102-41746104-chr4-In_Frame_Del-DEL-CCG-CCG--	0.000357463	PHOX2B	NCOR2 Intron	0.000379938	NCOR2
847	36469721-36469722-chr1-Frame_Shift_Ins-INS-----G	0.000443241	CSF3R	PLAG1 Non_Silent	0.000357463	PLAG1	11157118-11157118-chr1-Intron-SNP-G-G-C	0.00037498	MTOR
848	RP1 Non_Silent	0.000443226	RP1	FBLN2 Non_Silent	0.000357463	FBLN2	8910510-8910510-chr19-Splice_Site-SNP-T-T-G	0.000373407	MUC16
849	APC Non_Silent	0.000442865	APC	46012970-46012970-chr10-Missense_Mutation-SNP-T-T-G	0.000353739	NCOA4	32648391-32648392-chr8-Intron-DEL-AG-AG--	0.000371638	NRG1
850	NOTCH1 Intron	0.000441411	NOTCH1	42333743-42333743-chr17-Missense_Mutation-SNP-G-G-C	0.000353739	STAT3	CD7 Intron	0.00037067	CD7
851	MUC16 Intron	0.000441092	MUC16	PSIP1 Non_Silent	0.000353739	PSIP1	MAPK1 Intron	0.000364399	MAPK1
852	SETD2 Intron	0.000440954	SETD2	46378063-46378065-chr2-In_Frame_Del-DEL-CAG-CAG--	0.000353739	EPAS1	ITGAV Intron	0.000364375	ITGAV
853	RNF43 Synonymous	0.000440509	RNF43	CRNKL1 Non_Silent	0.000353739	CRNKL1	PMS2 Intron	0.000361484	PMS2
854	MUC1 Non_Silent	0.000440157	MUC1	15741860-15741860-chr16-Missense_Mutation-SNP-T-T-C	0.000353739	MYH11	MSH2 Intron	0.000361105	MSH2
855	THRAP3 Intron	0.000439752	THRAP3	85338329-85338329-chr8-Missense_Mutation-SNP-T-T-G	0.000353739	CA1	DDX3X Intron	0.000359894	DDX3X
856	ECT2 Intron	0.000439498	ECT2	TF Non_Silent	0.000353739	TF	FGFR3 Intron	0.000359805	FGFR3
857	152238746-152238746-chr7-Synonymous-SNP-G-G-A	0.000438189	KMT2C	56166699-56166699-chr8-Missense_Mutation-SNP-T-T-G	0.000353739	PLAG1	51391469-51391470-chr20-Intron-INS-----G	0.000358957	NFATC2
858	CD209 UTR	0.000437346	CD209	31185082-31185084-chr16-In_Frame_Del-DEL-GGC-GGC--	0.000353739	FUS	RCE1 Intron	0.000357013	RCE1
859	77922196-77922196-chr9-Missense_Mutation-SNP-T-T-A	0.000437232	GNAQ	29942876-29942876-chr6-Missense_Mutation-SNP-G-G-A	0.000353739	HLA-A	TH Intron	0.000355633	TH
860	ACVR2A Intron	0.00043605	ACVR2A	27184548-27184550-chr7-In_Frame_Del-DEL-GCC-GCC--	0.000353739	HOXA11	DDR2 Intron	0.00035562	DDR2
861	EWSR1 Intron	0.000435256	EWSR1	82316727-82316727-chr17-Missense_Mutation-SNP-T-T-G	0.000353739	CD7	196075067-196075067-chr3-Intron-SNP-T-T-A	0.00035394	TFRC
862	2055347-2055347-chr16-Intron-SNP-T-T-G	0.000435205	TSC2	44952884-44952884-chr18-Missense_Mutation-SNP-T-T-C	0.000353739	SETBP1	CS Intron	0.00035394	CS
863	8965528-8965528-chr19-Missense_Mutation-SNP-T-T-G	0.000435205	MUC16	NKX2-1 Non_Silent	0.000353739	NKX2-1	8914138-8914138-chr19-Intron-SNP-A-A-C	0.00035394	MUC16
864	33010803-33010803-chr1-3'Flank-SNP-T-T-G	0.000435205	AK2	CLTC Non_Silent	0.000353739	CLTC	13988621-13988621-chr7-Intron-DEL-A-A--	0.00035394	ETV1
865	JAK1 Non_Silent	0.000435205	JAK1	13778627-13778629-chr1-In_Frame_Del-DEL-GAA-GAA--	0.000353739	PRDM2	GATA3 Intron	0.00035394	GATA3
866	LRP1B Synonymous	0.000435205	LRP1B	129927262-129927262-chr9-Missense_Mutation-SNP-A-A-C	0.000353739	FNBP1	198742042-198742043-chr1-Intron-DEL-AA-AA--	0.00035394	PTPRC
867	RAD21 Intron	0.000435205	RAD21	91995613-91995613-chr7-Missense_Mutation-SNP-G-G-A	0.000353739	AKAP9	CDX2 Intron	0.00035394	CDX2
868	BLM Non_Silent	0.000435205	BLM	CD274 Non_Silent	0.000353739	CD274	8896121-8896121-chr19-Intron-SNP-T-T-C	0.00035394	MUC16
869	CR1 Non_Silent	0.000435205	CR1	12608837-12608837-chr3-Nonsense_Mutation-SNP-G-G-T	0.000353739	RAF1	LCK Intron	0.00035394	LCK
870	TRIM24 Non_Silent	0.000435205	TRIM24	127738359-127738361-chr8-In_Frame_Del-DEL-CAG-CAG--	0.000353739	MYC	5130447-5130447-chr17-Splice_Region-SNP-T-T-G	0.00035394	USP6
871	TBX3 Non_Silent	0.000435205	TBX3	108733164-108733164-chrX-Missense_Mutation-SNP-A-A-G	0.000353739	IRS4	53665640-53665640-chr3-Intron-DEL-T-T--	0.00035394	CACNA1D
872	106098682-106098682-chr6-Intron-SNP-T-T-G	0.000435205	PRDM1	55152609-55152609-chr7-Missense_Mutation-SNP-G-G-C	0.000353739	EGFR	25186928-25186928-chr18-Intron-SNP-G-G-A	0.00035394	ZNF521
873	ISX Intron	0.000435205	ISX	115063877-115063877-chr9-Missense_Mutation-SNP-C-C-G	0.000353739	TNC	152185479-152185480-chr7-Intron-INS-----T	0.00035394	KMT2C
874	8904760-8904760-chr19-Intron-DEL-T-T--	0.000435205	MUC16	8897634-8897634-chr19-Missense_Mutation-SNP-G-G-C	0.000353739	MUC16	13988620-13988621-chr7-Intron-INS-----AA	0.00035394	ETV1
875	94468827-94468827-chr13-Missense_Mutation-SNP-T-T-G	0.000435205	DCT	187726757-187726757-chr3-Missense_Mutation-SNP-A-A-G	0.000353739	BCL6	35432096-35432097-chr13-Intron-DEL-AT-AT--	0.00035394	NBEA
876	256399-256399-chr5-Synonymous-SNP-G-G-C	0.000435127	SDHA	31937407-31937409-chr17-In_Frame_Del-DEL-CCT-CCT--	0.000353739	SUZ12	RBM15 Intron	0.00035394	RBM15
877	HLA-A UTR	0.000435093	HLA-A	ERBB4 Non_Silent	0.000353739	ERBB4	TBP Intron	0.00035394	TBP
878	PRDM16 Flank	0.000434816	PRDM16	RNF43 Non_Silent	0.000353739	RNF43	31361144-31361144-chr10-Intron-SNP-T-T-A	0.00035394	ZEB1
879	58891707-58891709-chr20-5'UTR-DEL-CCG-CCG--	0.000434489	GNAS	23314599-23314599-chr22-Missense_Mutation-SNP-C-C-G	0.000353739	BCR	102287379-102287380-chr8-Intron-DEL-AC-AC--	0.00035394	UBR5
880	PTPRB Intron	0.000434449	PTPRB	50387397-50387397-chr7-Missense_Mutation-SNP-C-C-A	0.000353739	IKZF1	45896321-45896321-chr12-Intron-SNP-T-T-G	0.00035394	ARID2
881	147486029-147486029-chr7-Missense_Mutation-SNP-A-A-C	0.000433304	CNTNAP2	29944154-29944154-chr6-Missense_Mutation-SNP-A-A-G	0.000353739	HLA-A	APOBEC3B Intron	0.00035394	APOBEC3B
882	MED1 Synonymous	0.000433304	MED1	95106077-95106077-chr14-Missense_Mutation-SNP-T-T-G	0.000353739	DICER1	FOXR1 Intron	0.00035394	FOXR1
883	CA4 Intron	0.000433304	CA4	FUBP1 Non_Silent	0.000353739	FUBP1	CREB3 Intron	0.00035394	CREB3
884	CRTC3 Flank	0.000433304	CRTC3	40622267-40622267-chr15-Missense_Mutation-SNP-C-C-A	0.000353739	CASC5	101360035-101360035-chrX-Intron-SNP-T-T-G	0.00035394	BTK
885	MAP2 Non_Silent	0.000433304	MAP2	8886839-8886839-chr19-Missense_Mutation-SNP-A-A-G	0.000353076	MUC16	DDX5 Intron	0.00035394	DDX5
886	SFRP4 Intron	0.000433304	SFRP4	CBLB Non_Silent	0.00035092	CBLB	32648391-32648394-chr8-Intron-DEL-AGAG-AGAG--	0.00035394	NRG1
887	BCL2 Intron	0.000433304	BCL2	FAT1 Non_Silent	0.000348939	FAT1	13988242-13988242-chr7-Intron-SNP-G-G-A	0.00035394	ETV1
888	RNF43 Intron	0.000433304	RNF43	LCP1 Non_Silent	0.00034594	LCP1	ERCC5 Intron	0.00035394	ERCC5
889	XPA Flank	0.000433304	XPA	RAD21 Non_Silent	0.000341355	RAD21	FES Intron	0.00035394	FES
890	197396308-197396308-chr2-Missense_Mutation-SNP-G-G-T	0.000433304	SF3B1	SDHA Non_Silent	0.000340452	SDHA	2303248-2303248-chr1-Intron-SNP-C-C-T	0.00035394	SKI
891	186620946-186620946-chr4-Synonymous-SNP-G-G-T	0.000433304	FAT1	136496493-136496495-chr9-In_Frame_Del-DEL-GTG-GTG--	0.000338042	NOTCH1	C2orf44 Intron	0.00035394	C2orf44
892	SRC Intron	0.000433304	SRC	41177046-41177046-chr22-Missense_Mutation-SNP-T-T-G	0.000336147	EP300	152265351-152265351-chr7-Intron-SNP-G-G-A	0.00035394	KMT2C
893	32035791-32035792-chr10-Intron-DEL-TC-TC--	0.000433304	KIF5B	147620546-147620546-chr1-Missense_Mutation-SNP-G-G-T	0.000335274	BCL9	SDHC Intron	0.00035394	SDHC
894	TBP UTR	0.000433304	TBP	53973638-53973638-chr12-Missense_Mutation-SNP-A-A-C	0.00033347	HOXC11	45896318-45896318-chr12-Intron-SNP-T-T-G	0.00035394	ARID2
895	AFF4 Non_Silent	0.000433304	AFF4	PRDM1 Non_Silent	0.000328024	PRDM1	TFEB Intron	0.00035394	TFEB
896	190179573-190179573-chr4-3'Flank-SNP-T-T-A	0.000433304	DUX4	122328150-122328150-chr12-Missense_Mutation-SNP-C-C-T	0.000327619	CLIP1	90760096-90760098-chr15-Intron-DEL-TTT-TTT--	0.00035394	BLM
897	LRIG3 Non_Silent	0.000433304	LRIG3	CRTC1 Non_Silent	0.000327082	CRTC1	8896093-8896093-chr19-Splice_Region-SNP-A-A-C	0.00035394	MUC16
898	CDC7 Intron	0.000433304	CDC7	31229310-31229310-chr17-Missense_Mutation-SNP-T-T-G	0.000321204	NF1	152235948-152235948-chr7-Intron-SNP-G-G-A	0.00035394	KMT2C
899	RPN1 Intron	0.000432516	RPN1	CTCF Non_Silent	0.000319023	CTCF	152273897-152273897-chr7-Intron-SNP-T-T-C	0.00035394	KMT2C
900	IKBKB Intron	0.000431571	IKBKB	20414313-20414315-chr9-In_Frame_Del-DEL-CTG-CTG--	0.000308169	MLLT3	79857986-79857986-chr2-Intron-SNP-A-A-C	0.00035394	CTNNA2
901	MLLT1 Non_Silent	0.000431138	MLLT1	38482010-38482010-chr5-Missense_Mutation-SNP-T-T-G	0.000302389	LIFR	167918609-167918610-chr6-Intron-DEL-TG-TG--	0.00035394	MLLT4
902	SH2B3 Intron	0.000430999	SH2B3	33013358-33013358-chr1-Missense_Mutation-SNP-C-C-G	0.000299827	AK2	10064529-10064529-chr3-Intron-SNP-A-A-G	0.00035394	FANCD2
903	EGFR Synonymous	0.000430999	EGFR	ZNF384 Non_Silent	0.000298934	ZNF384	RAD51 Intron	0.00035394	RAD51
904	3679530-3679530-chr11-Intron-SNP-C-C-A	0.000430999	NUP98	152265083-152265083-chr7-Missense_Mutation-SNP-C-C-A	0.000288634	KMT2C	87932975-87932975-chr10-Intron-DEL-T-T--	0.00035394	PTEN
905	CYSLTR2 Intron	0.000430999	CYSLTR2	EPHA3 Non_Silent	0.000287456	EPHA3	DDX6 Intron	0.00035394	DDX6
906	61780729-61780731-chr17-Intron-DEL-AAC-AAC--	0.000430999	BRIP1	195783086-195783086-chr3-Missense_Mutation-SNP-A-A-G	0.000286898	MUC4	10981587-10981590-chr5-Intron-DEL-ACAC-ACAC--	0.00035394	CTNND2
907	198722350-198722351-chr1-Intron-DEL-AT-AT--	0.000430999	PTPRC	71198206-71198208-chr3-In_Frame_Del-DEL-TGC-TGC--	0.00028389	FOXP1	TSHR Intron	0.000353921	TSHR
908	39240895-39240898-chr22-Intron-DEL-TCTC-TCTC--	0.000430999	PDGFB	8886831-8886831-chr19-Missense_Mutation-SNP-G-G-A	0.000282038	MUC16	117414554-117414555-chr6-Intron-DEL-AA-AA--	0.000353026	ROS1
909	128694107-128694108-chr9-Intron-DEL-TA-TA--	0.000430999	SET	118495777-118495777-chr11-Missense_Mutation-SNP-A-A-C	0.000278295	KMT2A	152229892-152229892-chr7-Intron-SNP-A-A-G	0.000353026	KMT2C
910	MAF UTR	0.000430999	MAF	50492758-50492758-chr15-Missense_Mutation-SNP-C-C-A	0.00027539	USP8	41704168-41704168-chr8-Intron-SNP-G-G-T	0.000353026	ANK1
911	146774447-146774448-chr7-Intron-DEL-AT-AT--	0.000430999	CNTNAP2	26779439-26779440-chr1-Frame_Shift_Ins-INS-----G	0.000271749	ARID1A	45893388-45893391-chr12-Intron-DEL-TCTC-TCTC--	0.000353026	ARID2
912	148931920-148931920-chr1-Missense_Mutation-SNP-G-G-T	0.000430999	PDE4DIP	116401160-116401160-chr1-Missense_Mutation-SNP-A-A-C	0.00027148	ATP1A1	10048131-10048131-chr3-Intron-SNP-A-A-C	0.000353026	FANCD2
913	IL21R Intron	0.000430999	IL21R	LAT Non_Silent	0.000270072	LAT	108748908-108748908-chr2-Intron-DEL-T-T--	0.000353026	RANBP2
914	29942830-29942830-chr6-Synonymous-SNP-G-G-C	0.000430999	HLA-A	MAP3K1 Non_Silent	0.000265828	MAP3K1	138879193-138879193-chr6-Intron-SNP-G-G-A	0.000353026	ECT2L
915	102277121-102277121-chr8-Frame_Shift_Del-DEL-T-T--	0.000430999	UBR5	152248206-152248206-chr7-Missense_Mutation-SNP-G-G-A	0.000259426	KMT2C	186625678-186625679-chr2-Intron-INS-----GA	0.000353026	ITGAV
916	CUX1 Non_Silent	0.000430999	CUX1	NTRK1 Non_Silent	0.000253563	NTRK1	AK3 Intron	0.000353026	AK3
917	PPP6C Intron	0.000430987	PPP6C	SIRPA Non_Silent	0.00025228	SIRPA	42207488-42207495-chr17-Intron-DEL-CACACACA-CACACACA--	0.000353026	STAT5B
918	PF4 Synonymous	0.000430329	PF4	MED1 Non_Silent	0.000251551	MED1	2080113-2080113-chr16-Intron-SNP-T-T-G	0.000353026	TSC2
919	HOXA1 Synonymous	0.000428503	HOXA1	4117468-4117468-chr19-Missense_Mutation-SNP-A-A-C	0.000248146	MAP2K2	23273587-23273587-chr22-Intron-SNP-T-T-G	0.000353026	BCR
920	USP6 Synonymous	0.000427528	USP6	236563-236563-chr5-Missense_Mutation-SNP-G-G-A	0.000245695	SDHA	133760782-133760782-chr3-Intron-SNP-C-C-T	0.000353026	TF
921	KIAA1598 Intron	0.000426413	KIAA1598	13781628-13781628-chr1-Missense_Mutation-SNP-C-C-T	0.00024429	PRDM2	58999553-58999554-chr5-Intron-INS-----TATA	0.000353026	PDE4D
922	TRIM3 Synonymous	0.000426413	TRIM3	29944151-29944151-chr6-Missense_Mutation-SNP-C-C-G	0.000243201	HLA-A	5139187-5139187-chr17-Intron-SNP-T-T-G	0.000353026	USP6
923	129927262-129927262-chr9-Missense_Mutation-SNP-A-A-C	0.000426413	FNBP1	DNM2 Non_Silent	0.000242599	DNM2	28712068-28712068-chr22-Intron-SNP-A-A-C	0.000353026	CHEK2
924	EIF1 Intron	0.000426413	EIF1	71140774-71140776-chrX-In_Frame_Del-DEL-CAG-CAG--	0.000240664	MED12	HOXD11 Intron	0.000353026	HOXD11
925	ZNRF3 UTR	0.000426413	ZNRF3	152238825-152238825-chr7-Missense_Mutation-SNP-C-C-T	0.00023994	KMT2C	149010603-149010603-chr1-Splice_Region-SNP-A-A-C	0.000353026	PDE4DIP
926	6666687-6666687-chr12-3'Flank-SNP-T-T-G	0.000426413	ZNF384	SET Non_Silent	0.0002386	SET	2077537-2077537-chr16-Intron-SNP-G-G-T	0.000353026	TSC2
927	CD209 Flank	0.000426413	CD209	ARID1A Non_Silent	0.000222043	ARID1A	32763203-32763203-chr8-Intron-DEL-T-T--	0.000353026	NRG1
928	BRD4 Non_Silent	0.000426413	BRD4	195785758-195785758-chr3-Missense_Mutation-SNP-C-C-A	0.00022015	MUC4	RPN1 Intron	0.000353026	RPN1
929	PTPRT UTR	0.000426413	PTPRT	152265049-152265049-chr7-Nonsense_Mutation-SNP-G-G-T	0.000214011	KMT2C	101360036-101360037-chrX-Intron-DEL-AG-AG--	0.000353026	BTK
930	108201855-108201855-chr8-3'UTR-DEL-T-T--	0.000426413	EIF3E	CACNA1D Non_Silent	0.000213043	CACNA1D	SP8 Intron	0.000353026	SP8
931	53973638-53973638-chr12-Missense_Mutation-SNP-A-A-C	0.000426413	HOXC11	SPECC1 Non_Silent	0.000212742	SPECC1	120479928-120479928-chr11-Intron-DEL-T-T--	0.000353026	ARHGEF12
932	BRD4 Intron	0.000426055	BRD4	187726755-187726755-chr3-Missense_Mutation-SNP-C-C-G	0.000211181	BCL6	IL7R Intron	0.000353026	IL7R
933	DICER1 Intron	0.000425887	DICER1	XPA Non_Silent	0.000201046	XPA	54645088-54645089-chr12-Intron-INS-----G	0.000353026	DCD
934	ARHGAP26 Intron	0.00042465	ARHGAP26	DROSHA Non_Silent	0.000197702	DROSHA	192917586-192917587-chr3-Intron-DEL-CA-CA--	0.000353026	MB21D2
935	BCLAF1 Synonymous	0.000424353	BCLAF1	FAM46C Non_Silent	0.000197579	FAM46C	8910509-8910509-chr19-Splice_Site-SNP-C-C-A	0.000353026	MUC16
936	ZNF384 Non_Silent	0.000424353	ZNF384	AMER1 Non_Silent	0.000181697	AMER1	45076680-45076682-chrX-Intron-DEL-TTT-TTT--	0.000353026	KDM6A
937	8896095-8896095-chr19-Splice_Region-DEL-A-A--	0.000424353	MUC16	179107721-179107721-chr1-Missense_Mutation-SNP-C-C-A	0.000175814	ABL2	161362321-161362321-chr1-Splice_Region-SNP-G-G-T	0.000353026	SDHC
938	5130305-5130305-chr17-Intron-SNP-G-G-A	0.000424353	USP6	CLTCL1 Non_Silent	0.000171437	CLTCL1	133764909-133764909-chr3-Splice_Site-SNP-T-T-G	0.000353026	TF
939	KLK2 Flank	0.000424353	KLK2	113241577-113241577-chr2-Missense_Mutation-SNP-A-A-G	0.000169151	PAX8	8682957-8682958-chr2-Intron-DEL-GC-GC--	0.000353026	ID2
940	12718003-12718003-chr12-Missense_Mutation-SNP-C-C-G	0.000424353	CDKN1B	195783103-195783103-chr3-Missense_Mutation-SNP-A-A-G	0.000165848	MUC4	53399717-53399717-chr4-Intron-DEL-T-T--	0.000353026	FIP1L1
941	112682713-112682714-chr8-Intron-DEL-AG-AG--	0.000424353	CSMD3	CARS Non_Silent	0.000155155	CARS	81096719-81096719-chr14-Intron-SNP-G-G-T	0.000353026	TSHR
942	8985600-8985602-chr3-In_Frame_Del-DEL-GCT-GCT--	0.000424353	SRGAP3	MAP2K2 Non_Silent	0.000150602	MAP2K2	18450425-18450425-chr19-Intron-SNP-T-T-G	0.000353026	ELL
943	59814600-59814605-chr10-Intron-DEL-ACACAC-ACACAC--	0.000424353	CCDC6	60856479-60856481-chr8-In_Frame_Del-DEL-GGA-GGA--	0.000148161	CHD7	100736558-100736558-chr3-Intron-DEL-T-T--	0.000353026	TFG
944	STRN Intron	0.000424353	STRN	195785696-195785696-chr3-Missense_Mutation-SNP-G-G-A	0.000143993	MUC4	39709151-39709153-chr17-Intron-DEL-GTG-GTG--	0.000353026	ERBB2
945	CBL Intron	0.000424109	CBL	CCNE1 Non_Silent	0.000138141	CCNE1	PDCD1 Intron	0.000353026	PDCD1
946	COA1 Intron	0.000424109	COA1	ZNF429 Non_Silent	0.000137674	ZNF429	60156365-60156367-chr17-Intron-DEL-GGA-GGA--	0.000353026	CA4
947	CHST11 Non_Silent	0.000424109	CHST11	GK Non_Silent	0.000124438	GK	105272497-105272498-chr4-Intron-DEL-AC-AC--	0.000353026	TET2
948	BCR Non_Silent	0.000424109	BCR	GATA1 Non_Silent	0.000122404	GATA1	CDK1 Intron	0.000353026	CDK1
949	RAD51 Intron	0.000424109	RAD51	1915243-1915243-chr20-Missense_Mutation-SNP-G-G-C	0.000115731	SIRPA	10073532-10073532-chr3-Intron-SNP-C-C-T	0.000353026	FANCD2
950	MYCN Non_Silent	0.000424109	MYCN	195781259-195781259-chr3-Missense_Mutation-SNP-C-C-G	0.000101021	MUC4	179220948-179220949-chr3-Intron-DEL-TA-TA--	0.000353026	PIK3CA
951	7766594-7766595-chr1-3'UTR-DEL-CA-CA--	0.000424109	CAMTA1	195780236-195780236-chr3-Missense_Mutation-SNP-C-C-G	9.73336e-05	MUC4	RD3 Intron	0.000353026	RD3
952	243843242-243843244-chr1-5'UTR-DEL-CTG-CTG--	0.000424109	AKT3	71765522-71765522-chr4-Missense_Mutation-SNP-T-T-G	9.46989e-05	GC	207564326-207564329-chr1-Intron-DEL-ACAC-ACAC--	0.000353026	CR1
953	115063877-115063877-chr9-Missense_Mutation-SNP-C-C-G	0.000424109	TNC	RPL10 Non_Silent	9.03999e-05	RPL10	64857635-64857635-chr1-Intron-SNP-C-C-A	0.000353026	JAK1
954	PAFAH1B2 Intron	0.000424109	PAFAH1B2	KAT6A Non_Silent	8.75944e-05	KAT6A	106458996-106458996-chr2-Intron-SNP-T-T-C	0.000353026	RGPD3
955	RUNX1 Non_Silent	0.000424109	RUNX1	NUTM2B Non_Silent	8.30711e-05	NUTM2B	100007026-100007028-chr2-Intron-DEL-GAA-GAA--	0.000353026	AFF3
956	ZNRF3 Synonymous	0.000424109	ZNRF3	PSD Non_Silent	7.97161e-05	PSD	ZNF479 Intron	0.000353026	ZNF479
957	29944013-29944013-chr6-Intron-SNP-T-T-C	0.000424109	HLA-A	87228805-87228805-chr10-Missense_Mutation-SNP-G-G-A	7.63914e-05	NUTM2A	PMS1 Intron	0.000353026	PMS1
958	THRA Intron	0.000423857	THRA	FOXP1 Non_Silent	7.42627e-05	FOXP1	T Intron	0.000352258	T
959	NUMA1 Non_Silent	0.000423536	NUMA1	57106769-57106769-chr12-Missense_Mutation-SNP-C-C-A	7.36262e-05	STAT6	CA2 Intron	0.000349976	CA2
960	CP Intron	0.000423479	CP	49933321-49933321-chr10-Missense_Mutation-SNP-C-C-T	5.65149e-05	PARG	32648338-32648338-chr8-Intron-SNP-T-T-C	0.000349976	NRG1
961	CREBBP Synonymous	0.000422207	CREBBP	33013400-33013401-chr1-Frame_Shift_Ins-INS-----ATGTC	5.23064e-05	AK2	56096962-56096963-chr12-Intron-INS-----G	0.000349976	ERBB3
962	GAS7 Non_Silent	0.000422207	GAS7	BCR Non_Silent	5.09322e-05	BCR	180620740-180620743-chr5-Intron-DEL-GTGT-GTGT--	0.000349976	FLT4
963	152273625-152273625-chr7-Intron-SNP-C-C-A	0.000422207	KMT2C	195780221-195780221-chr3-Missense_Mutation-SNP-T-T-A	4.47659e-05	MUC4	11750818-11750818-chr12-Intron-SNP-G-G-T	0.000349976	ETV6
964	FANCD2 Synonymous	0.000422207	FANCD2	195783140-195783140-chr3-Missense_Mutation-SNP-C-C-T	4.07644e-05	MUC4	2055344-2055344-chr16-Intron-SNP-A-A-G	0.000349976	TSC2
965	AK3 Intron	0.000422207	AK3	75028887-75028889-chr10-In_Frame_Del-DEL-GAG-GAG--	3.09298e-05	KAT6B	24180730-24180730-chr16-Intron-SNP-T-T-G	0.000349976	PRKCB
966	ERCC5 Intron	0.000422207	ERCC5	92042078-92042079-chr7-Frame_Shift_Del-DEL-AG-AG--	2.47347e-05	AKAP9	29943963-29943963-chr6-Intron-SNP-A-A-G	0.000349976	HLA-A
967	RUNX1T1 UTR	0.000422207	RUNX1T1	136518645-136518645-chr9-Missense_Mutation-SNP-T-T-G	1.8372e-05	NOTCH1	28035677-28035677-chr13-Splice_Region-DEL-A-A--	0.000349976	FLT3
968	PTPRT Non_Silent	0.000422207	PTPRT	SF3B1 Non_Silent	1.36355e-05	SF3B1	CDKN2C Intron	0.000349976	CDKN2C
969	ACVR1 Non_Silent	0.000422207	ACVR1	SGK1 Non_Silent	9.3244e-06	SGK1	54146544-54146544-chr19-Intron-SNP-T-T-G	0.000349976	CNOT3
970	F12 Intron	0.000422207	F12				NCKIPSD Intron	0.000349976	NCKIPSD
971	6667904-6667912-chr12-In_Frame_Del-DEL-TGCTGCTGC-TGCTGCTGC--	0.000422207	ZNF384				SDC4 Intron	0.000349976	SDC4
972	NCOR2 Non_Silent	0.000422207	NCOR2				CHST11 Intron	0.000349976	CHST11
973	ZNF479 Synonymous	0.000422207	ZNF479				152238831-152238831-chr7-Splice_Region-SNP-G-G-T	0.000349976	KMT2C
974	29193307-29193307-chr2-Missense_Mutation-SNP-C-C-T	0.000422207	ALK				47101598-47101601-chr3-Intron-DEL-GTGT-GTGT--	0.000349976	SETD2
975	10048150-10048150-chr3-Intron-SNP-A-A-T	0.000422207	FANCD2				59814600-59814601-chr10-Intron-DEL-AC-AC--	0.000349976	CCDC6
976	RUNX1T1 Non_Silent	0.000422207	RUNX1T1				50086368-50086371-chr12-Intron-DEL-GAGG-GAGG--	0.000349976	SMARCD1
977	AXIN2 Synonymous	0.000422207	AXIN2				102196577-102196577-chr7-Intron-DEL-T-T--	0.000349976	CUX1
978	74041290-74041290-chr7-Intron-SNP-A-A-C	0.000422207	ELN				152238907-152238907-chr7-Intron-SNP-A-A-G	0.000349976	KMT2C
979	12609137-12609138-chr3-Intron-DEL-TA-TA--	0.000422159	RAF1				15763747-15763748-chr16-Intron-INS-----C	0.000349976	MYH11
980	PSIP1 Intron	0.00042214	PSIP1				188524893-188524893-chr3-Intron-SNP-G-G-T	0.000349976	LPP
981	HOXD13 Non_Silent	0.000422048	HOXD13				66844196-66844196-chr11-Intron-SNP-A-A-G	0.000349976	RCE1
982	195811631-195811632-chr3-Intron-DEL-TC-TC--	0.000422048	MUC4				CD79A Intron	0.000349976	CD79A
983	87228805-87228805-chr10-Missense_Mutation-SNP-G-G-A	0.000422048	NUTM2A				204537760-204537761-chr1-Intron-DEL-TG-TG--	0.000349976	MDM4
984	11012971-11012971-chr19-Missense_Mutation-SNP-T-T-G	0.000422048	SMARCA4				RMI2 Intron	0.000349976	RMI2
985	PSD Non_Silent	0.000422048	PSD				POU5F1 Intron	0.000349976	POU5F1
986	150134048-150134048-chr5-Intron-SNP-A-A-C	0.000422048	PDGFRB				95508043-95508044-chr9-Intron-DEL-GT-GT--	0.000349976	PTCH1
987	152229931-152229931-chr7-Missense_Mutation-SNP-T-T-C	0.000422048	KMT2C				12609137-12609138-chr3-Intron-DEL-TA-TA--	0.000349976	RAF1
988	100721442-100721442-chr8-Missense_Mutation-SNP-T-T-G	0.000422048	PABPC1				102572888-102572902-chr10-Intron-DEL-TCACAGCCTATTTGA-TCACAGCCTATTTGA--	0.000349976	SUFU
989	47171187-47171189-chrX-In_Frame_Del-DEL-GAG-GAG--	0.000422048	RBM10				49619120-49619120-chr17-Intron-DEL-A-A--	0.000349976	SPOP
990	100709179-100709179-chr8-Synonymous-SNP-T-T-C	0.000422048	PABPC1				156935455-156935455-chr6-Intron-DEL-T-T--	0.000349976	ARID1B
991	FANCD2 Flank	0.000422048	FANCD2				106432828-106432828-chr2-Intron-SNP-T-T-G	0.000349976	RGPD3
992	8896121-8896121-chr19-Intron-SNP-T-T-C	0.000422048	MUC16				NFKBIE Intron	0.000349976	NFKBIE
993	1915338-1915338-chr20-Missense_Mutation-SNP-C-C-A	0.000422048	SIRPA				MT3 Intron	0.000349976	MT3
994	186595770-186595770-chr4-Missense_Mutation-SNP-A-A-G	0.000422048	FAT1				113152515-113152515-chr10-Intron-SNP-A-A-C	0.000349976	TCF7L2
995	15264811-15264811-chr19-Intron-SNP-C-C-G	0.000422048	BRD4				ELK4 Intron	0.000349976	ELK4
996	APOBEC3B Non_Silent	0.000422048	APOBEC3B				ELF3 Intron	0.000349976	ELF3
997	180628858-180628858-chr5-Intron-SNP-T-T-G	0.000422048	FLT4				152273620-152273620-chr7-Intron-SNP-A-A-C	0.000349976	KMT2C
998	MYC Intron	0.000422048	MYC				75733400-75733400-chr7-Intron-SNP-T-T-G	0.000349976	HIP1
999	53722394-53722394-chr3-Missense_Mutation-SNP-T-T-G	0.000422048	CACNA1D				SFRP4 Intron	0.000349976	SFRP4
1000	27095698-27095700-chr7-In_Frame_Del-DEL-TGG-TGG--	0.000422048	HOXA1				10049115-10049115-chr3-Intron-SNP-A-A-C	0.000349976	FANCD2
1001	131988790-131988790-chr5-Intron-SNP-T-T-G	0.000421393	ACSL6				66850937-66850940-chr11-Intron-DEL-GAGA-GAGA--	0.000349976	PC
1002	109969024-109969024-chr4-Synonymous-SNP-T-T-G	0.000421157	EGF				152273610-152273610-chr7-Intron-SNP-A-A-T	0.000349976	KMT2C
1003	ZFHX3 Non_Silent	0.000420806	ZFHX3				15798640-15798640-chr16-Intron-SNP-G-G-A	0.000349976	MYH11
1004	61492168-61492168-chr2-Missense_Mutation-SNP-C-C-A	0.000420147	XPO1				47791155-47791158-chr2-Intron-DEL-TGTG-TGTG--	0.000349976	MSH6
1005	29944124-29944124-chr6-Missense_Mutation-SNP-C-C-G	0.000420147	HLA-A				ZNF331 Intron	0.000349976	ZNF331
1006	29944135-29944135-chr6-Synonymous-SNP-A-A-G	0.000420147	HLA-A				NFKB2 Intron	0.000345911	NFKB2
1007	40420883-40420885-chr22-In_Frame_Del-DEL-TGC-TGC--	0.000420147	MKL1				132893568-132893569-chr8-Intron-DEL-GT-GT--	0.000343232	TG
1008	27198268-27198268-chr7-Missense_Mutation-SNP-A-A-C	0.000420147	HOXA13				ETV5 Intron	0.000338728	ETV5
1009	63532451-63532451-chr20-Intron-DEL-G-G--	0.000420147	PTK6				ROS1 Intron	0.000338658	ROS1
1010	MED1 UTR	0.000420147	MED1				74065651-74065651-chr7-Intron-SNP-T-T-G	0.000332887	ELN
1011	67835180-67835180-chr14-Missense_Mutation-SNP-G-G-T	0.000420147	RAD51B				3679530-3679530-chr11-Intron-SNP-C-C-A	0.000332887	NUP98
1012	110661809-110661809-chr2-Synonymous-SNP-G-G-T	0.000420147	BUB1				CCR7 Intron	0.000332887	CCR7
1013	ELF4 Non_Silent	0.000420147	ELF4				188760439-188760439-chr3-Intron-SNP-T-T-C	0.000332887	LPP
1014	BMP5 Intron	0.000420147	BMP5				176094386-176094389-chr2-Intron-DEL-CACA-CACA--	0.000332887	HOXD13
1015	GRM3 Non_Silent	0.000420147	GRM3				ARHGAP5 Intron	0.000332887	ARHGAP5
1016	MAML2 Intron	0.000420147	MAML2				PHOX2B Intron	0.000332887	PHOX2B
1017	MYH1 Non_Silent	0.000420147	MYH1				54727162-54727162-chr4-Intron-SNP-T-T-G	0.000332887	KIT
1018	36293373-36293375-chr22-In_Frame_Del-DEL-CCT-CCT--	0.000420147	MYH9				31201389-31201389-chr17-Intron-DEL-T-T--	0.000332887	NF1
1019	ERCC3 Intron	0.000420147	ERCC3				KCNJ5 Intron	0.000332887	KCNJ5
1020	102572972-102572972-chr10-Intron-SNP-C-C-G	0.000420147	SUFU				PTEN Intron	0.000332887	PTEN
1021	MED1 Non_Silent	0.000420147	MED1				75549134-75549134-chr7-Intron-DEL-G-G--	0.000332887	HIP1
1022	PIK3R1 UTR	0.000420147	PIK3R1				5141346-5141347-chr17-Intron-DEL-AA-AA--	0.000332887	USP6
1023	RGS7 Non_Silent	0.000420147	RGS7				HOXA1 Intron	0.000332887	HOXA1
1024	TF Intron	0.000418472	TF				TBX3 Intron	0.000332887	TBX3
1025	EML4 Intron	0.000418363	EML4				SMO Intron	0.000332887	SMO
1026	CDH17 Intron	0.000418297	CDH17				VHL Intron	0.000332887	VHL
1027	F7 Non_Silent	0.000417918	F7				SEPT5 Intron	0.000332887	SEPT5
1028	SP1 Non_Silent	0.000416963	SP1				MSN Intron	0.000332887	MSN
1029	PTPN13 Non_Silent	0.000416881	PTPN13				15803623-15803624-chrX-Intron-DEL-GT-GT--	0.000332887	ZRSR2
1030	RAD51B Non_Silent	0.000413257	RAD51B				29944050-29944050-chr6-Intron-SNP-G-G-A	0.000332887	HLA-A
1031	CBL UTR	0.000413257	CBL				47471158-47471158-chr2-Intron-SNP-C-C-A	0.000332887	MSH2
1032	TCEA1 Intron	0.000413257	TCEA1				68477627-68477629-chr14-Intron-DEL-TTT-TTT--	0.000332887	RAD51B
1033	10048168-10048168-chr3-Intron-SNP-A-A-G	0.000413257	FANCD2				207526856-207526856-chr1-Intron-SNP-C-C-T	0.000332887	CR1
1034	DNMT3A Non_Silent	0.000413257	DNMT3A				152235677-152235677-chr7-Intron-DEL-A-A--	0.000332887	KMT2C
1035	TRRAP Synonymous	0.000413257	TRRAP				48464989-48464989-chr13-Intron-SNP-C-C-T	0.000332887	RB1
1036	47410088-47410088-chr2-Splice_Region-SNP-A-A-T	0.000413257	MSH2				117159909-117159910-chr11-Intron-DEL-TT-TT--	0.000332887	PAFAH1B2
1037	KAT6A Intron	0.000413257	KAT6A				10047660-10047663-chr3-Intron-DEL-TGTT-TGTT--	0.000332887	FANCD2
1038	47223990-47223990-chr1-Intron-SNP-T-T-G	0.000413257	TAL1				116769622-116769624-chr7-Intron-DEL-TTT-TTT--	0.000332887	MET
1039	33010835-33010836-chr1-3'Flank-INS-----TTG	0.000413257	AK2				114716209-114716209-chr1-Intron-SNP-C-C-G	0.000332887	NRAS
1040	IST1 Non_Silent	0.000413257	IST1				NR4A3 Intron	0.000332887	NR4A3
1041	F7 Intron	0.000413257	F7				36475338-36475338-chr1-Intron-SNP-T-T-G	0.000332887	CSF3R
1042	HEY1 Intron	0.000413257	HEY1				CBFB Intron	0.000332887	CBFB
1043	152273610-152273610-chr7-Intron-SNP-A-A-T	0.000413257	KMT2C				106463097-106463097-chr2-Intron-SNP-T-T-C	0.000332887	RGPD3
1044	102416883-102416883-chr10-Synonymous-SNP-A-A-C	0.000413257	PSD				ACSL3 Intron	0.000332887	ACSL3
1045	CREB1 Non_Silent	0.000413257	CREB1				PIK3CA Intron	0.000332887	PIK3CA
1046	152247896-152247896-chr7-Splice_Region-SNP-C-C-A	0.000413257	KMT2C				186338000-186338000-chr1-Intron-DEL-T-T--	0.000332887	TPR
1047	32741974-32741974-chr8-Intron-DEL-T-T--	0.000413257	NRG1				4097236-4097236-chr19-Intron-SNP-G-G-A	0.000332887	MAP2K2
1048	MEN1 Non_Silent	0.000413257	MEN1				105731612-105731614-chr3-Intron-DEL-TTA-TTA--	0.000332887	CBLB
1049	92883335-92883335-chr11-Synonymous-SNP-A-A-C	0.000413257	FAT3				29945123-29945123-chr6-Intron-SNP-C-C-A	0.000332887	HLA-A
1050	GRIN2A Non_Silent	0.000413257	GRIN2A				31327956-31327956-chr17-Intron-SNP-G-G-A	0.000332887	NF1
1051	ABL1 Non_Silent	0.00041273	ABL1				40586925-40586927-chr22-Intron-DEL-TGC-TGC--	0.000332887	MKL1
1052	MPL Intron	0.000412305	MPL				31361081-31361081-chr10-Intron-SNP-A-A-G	0.000332887	ZEB1
1053	XPO1 Intron	0.00041226	XPO1				30708033-30708033-chrX-Intron-DEL-T-T--	0.000332887	GK
1054	EPS15 Intron	0.000411415	EPS15				IK Intron	0.000332887	IK
1055	AKAP9 Synonymous	0.00041124	AKAP9				COA1 Intron	0.000332887	COA1
1056	CCNE1 Intron	0.000409289	CCNE1				CRNKL1 Intron	0.000332887	CRNKL1
1057	BCLAF1 Non_Silent	0.000408557	BCLAF1				109963086-109963086-chr4-Intron-SNP-C-C-A	0.000332887	EGF
1058	ANK1 Intron	0.000407928	ANK1				39240895-39240896-chr22-Intron-DEL-TC-TC--	0.000331838	PDGFB
1059	152265028-152265028-chr7-Intron-SNP-G-G-T	0.000407223	KMT2C				47225897-47225900-chr1-Splice_Region-DEL-CAGA-CAGA--	0.000330628	TAL1
1060	FBXW7 Non_Silent	0.000405975	FBXW7				BCL6 Intron	0.000329154	BCL6
1061	TERT Non_Silent	0.00040474	TERT				TSC2 Intron	0.000327348	TSC2
1062	114398011-114398014-chr1-Intron-DEL-AAAA-AAAA--	0.000403948	TRIM33				KDSR Intron	0.000325058	KDSR
1063	72788135-72788137-chr16-In_Frame_Del-DEL-GCT-GCT--	0.000403852	ZFHX3				PAX8 Intron	0.000324426	PAX8
1064	NBN Intron	0.000402356	NBN				POLQ Intron	0.000324416	POLQ
1065	104757028-104757028-chr12-Missense_Mutation-SNP-C-C-A	0.000402307	CHST11				236619-236619-chr5-Intron-SNP-G-G-C	0.000323146	SDHA
1066	FGFR2 Intron	0.000402226	FGFR2				50489795-50489795-chr15-Splice_Region-SNP-A-A-T	0.000323146	USP8
1067	NUTM2A Intron	0.000402108	NUTM2A				THRAP3 Intron	0.000323146	THRAP3
1068	41933754-41933754-chr8-Missense_Mutation-SNP-T-T-G	0.000401329	KAT6A				CCND2 Intron	0.000323146	CCND2
1069	136496493-136496495-chr9-In_Frame_Del-DEL-GTG-GTG--	0.000400961	NOTCH1				ELF4 Intron	0.000323146	ELF4
1070	C7 Non_Silent	0.000400268	C7				195765541-195765541-chr3-Intron-SNP-A-A-C	0.000323146	MUC4
1071	ZBTB16 Intron	0.000399919	ZBTB16				92890349-92890349-chr11-Intron-SNP-G-G-T	0.000323146	FAT3
1072	ZNF521 Non_Silent	0.000399563	ZNF521				169128114-169128114-chr3-Intron-SNP-A-A-C	0.000323146	MECOM
1073	JAK3 Intron	0.000399395	JAK3				SDHAF2 Intron	0.000323146	SDHAF2
1074	EBF1 Intron	0.000398333	EBF1				11027998-11027998-chr19-Intron-SNP-G-G-C	0.000323146	SMARCA4
1075	MUC16 Synonymous	0.000397018	MUC16				ZNF2 Intron	0.000323146	ZNF2
1076	DDR2 Intron	0.000396262	DDR2				10047700-10047700-chr3-Intron-SNP-A-A-G	0.000323146	FANCD2
1077	119278646-119278648-chr11-In_Frame_Del-DEL-ATG-ATG--	0.000395382	CBL				DCT Intron	0.000323146	DCT
1078	MAP2K1 Intron	0.000393194	MAP2K1				40240209-40240209-chr19-Intron-SNP-T-T-C	0.000323146	AKT2
1079	56719925-56719925-chr12-Intron-SNP-T-T-G	0.000392844	NACA				XPA Intron	0.000323146	XPA
1080	29944059-29944059-chr6-Intron-SNP-C-C-T	0.000390711	HLA-A				121494035-121494036-chr3-Intron-DEL-CT-CT--	0.000323146	POLQ
1081	EIF3E Intron	0.000390423	EIF3E				138368041-138368041-chr8-Intron-SNP-T-T-C	0.000323146	FAM135B
1082	TBL1X Intron	0.000388954	TBL1X				131164195-131164196-chr9-Intron-DEL-GT-GT--	0.000323146	NUP214
1083	KAT6B Intron	0.000388877	KAT6B				48381228-48381228-chr13-Intron-DEL-T-T--	0.000323146	RB1
1084	IRF4 Intron	0.00038855	IRF4				11750819-11750819-chr12-Intron-SNP-C-C-T	0.000323146	ETV6
1085	RET Intron	0.000387693	RET				152185650-152185650-chr7-Intron-SNP-G-G-A	0.000323146	KMT2C
1086	CCDC6 Intron	0.000387388	CCDC6				5135310-5135310-chr17-Intron-SNP-A-A-G	0.000323146	USP6
1087	157207311-157207311-chr6-Missense_Mutation-SNP-T-T-G	0.000387065	ARID1B				47223990-47223990-chr1-Intron-SNP-T-T-G	0.000323146	TAL1
1088	MET Intron	0.000386746	MET				10064924-10064924-chr3-Intron-SNP-T-T-C	0.000323146	FANCD2
1089	236534-236534-chr5-Missense_Mutation-SNP-C-C-T	0.00038671	SDHA				19224092-19224092-chr22-Intron-SNP-A-A-C	0.000323146	CLTCL1
1090	201285360-201285361-chr2-Intron-INS-----C	0.000386362	CASP8				39423885-39423885-chr17-Intron-SNP-A-A-C	0.000323146	MED1
1091	63532431-63532432-chr20-Intron-DEL-GT-GT--	0.00038463	PTK6				80153172-80153176-chr15-Intron-DEL-GGAGT-GGAGT--	0.000323146	FAH
1092	PMS2 Intron	0.000384114	PMS2				6678044-6678044-chr19-Intron-SNP-T-T-G	0.000323146	C3
1093	53666432-53666432-chr3-Missense_Mutation-SNP-T-T-G	0.000383864	CACNA1D				102285041-102285044-chr8-Intron-DEL-AAAC-AAAC--	0.000323146	UBR5
1094	IL7 Intron	0.00038145	IL7				167003333-167003333-chr6-Intron-DEL-T-T--	0.000323146	FGFR1OP
1095	195786336-195786336-chr3-Synonymous-SNP-A-A-G	0.000380722	MUC4				CNBP Intron	0.000323146	CNBP
1096	53453081-53453082-chr4-Frame_Shift_Del-DEL-AG-AG--	0.00038001	FIP1L1				RPL22 Intron	0.000323146	RPL22
1097	RANBP2 Intron	0.000378734	RANBP2				142553434-142553437-chr3-Intron-DEL-ACAC-ACAC--	0.000323146	ATR
1098	RIN2 Intron	0.000378255	RIN2				56920031-56920034-chr15-Intron-DEL-TTTG-TTTG--	0.000323146	TCF12
1099	50186693-50186693-chr17-Missense_Mutation-SNP-T-T-G	0.000378142	COL1A1				152238973-152238973-chr7-Intron-SNP-T-T-C	0.000323146	KMT2C
1100	193142099-193142100-chr1-Intron-DEL-GA-GA--	0.000375688	CDC73				55115593-55115594-chr4-Intron-DEL-TG-TG--	0.000323146	KDR
1101	ABL1 Intron	0.000375551	ABL1				10063981-10063981-chr3-Intron-SNP-C-C-G	0.000323146	FANCD2
1102	ERCC2 Non_Silent	0.000375497	ERCC2				STIL Intron	0.000323146	STIL
1103	135192491-135192491-chr6-Missense_Mutation-SNP-T-T-C	0.00037447	MYB				58999554-58999555-chr5-Intron-DEL-TA-TA--	0.000323146	PDE4D
1104	33012985-33012986-chr1-3'Flank-DEL-CA-CA--	0.000373727	AK2				108235111-108235111-chr8-Intron-DEL-A-A--	0.000323146	EIF3E
1105	8896164-8896164-chr19-Intron-SNP-C-C-T	0.000373639	MUC16				49885070-49885073-chr10-Intron-DEL-CTCT-CTCT--	0.000323146	PARG
1106	BRCA2 Non_Silent	0.000373443	BRCA2				175127253-175127253-chr1-Intron-SNP-C-C-T	0.000323146	TNN
1107	UBP1 Intron	0.000373077	UBP1				222295484-222295484-chr2-Intron-SNP-C-C-A	0.000323146	PAX3
1108	TNFRSF14 Intron	0.000372514	TNFRSF14				47302399-47302399-chr1-Intron-SNP-A-A-C	0.000323146	STIL
1109	HOXC11 Non_Silent	0.000372502	HOXC11				SRSF3 Intron	0.000308993	SRSF3
1110	29944102-29944102-chr6-Intron-SNP-T-T-G	0.000371083	HLA-A				RNF43 Intron	0.000307057	RNF43
1111	71140830-71140832-chrX-In_Frame_Del-DEL-GCA-GCA--	0.00037074	MED12				8896136-8896137-chr19-Intron-INS-----T	0.000304848	MUC16
1112	LASP1 Intron	0.000370467	LASP1				31096754-31096754-chr8-Intron-SNP-G-G-T	0.000299639	WRN
1113	WRN Non_Silent	0.000368936	WRN				66850937-66850938-chr11-Intron-DEL-GA-GA--	0.000297893	PC
1114	CIC Intron	0.000368919	CIC				FAT4 Intron	0.000295276	FAT4
1115	8886831-8886831-chr19-Missense_Mutation-SNP-G-G-A	0.000368495	MUC16				KEAP1 Intron	0.000285369	KEAP1
1116	100705039-100705039-chr8-Missense_Mutation-SNP-G-G-A	0.000367434	PABPC1				BUB1 Intron	0.000283821	BUB1
1117	PTPN6 Intron	0.000366865	PTPN6				LZTR1 Intron	0.00027567	LZTR1
1118	CNBD1 Intron	0.000364408	CNBD1				POU2AF1 Intron	0.000273375	POU2AF1
1119	ARID2 Intron	0.000362938	ARID2				31096742-31096742-chr8-Intron-SNP-C-C-T	0.00027081	WRN
1120	FLT4 Intron	0.000362887	FLT4				10047693-10047693-chr3-Intron-SNP-G-G-A	0.000269492	FANCD2
1121	KDM5A Non_Silent	0.000362348	KDM5A				PER1 Intron	0.000268527	PER1
1122	BCL9L UTR	0.000362042	BCL9L				44248808-44248810-chr6-Intron-DEL-TTT-TTT--	0.000268198	HSP90AB1
1123	9052989-9052989-chr3-Intron-SNP-G-G-T	0.000361027	SRGAP3				EZR Intron	0.000261087	EZR
1124	FGFR1OP Intron	0.000360462	FGFR1OP				CRTC1 Intron	0.0002604	CRTC1
1125	152235880-152235880-chr7-Synonymous-SNP-C-C-T	0.000358876	KMT2C				EGF Intron	0.000260041	EGF
1126	SYK Intron	0.000356038	SYK				NCOA2 Intron	0.00025658	NCOA2
1127	CEP89 Intron	0.000355929	CEP89				152185683-152185683-chr7-Intron-SNP-T-T-C	0.000255929	KMT2C
1128	NR4A3 Non_Silent	0.000355915	NR4A3				PAX7 Intron	0.000255879	PAX7
1129	152248119-152248119-chr7-Missense_Mutation-SNP-G-G-A	0.000355688	KMT2C				36286515-36286516-chr22-Intron-DEL-CA-CA--	0.000254237	MYH9
1130	214780609-214780609-chr2-Missense_Mutation-SNP-A-A-C	0.000355308	BARD1				CNTNAP2 Intron	0.000254115	CNTNAP2
1131	50850593-50850594-chr10-Intron-DEL-TG-TG--	0.000355286	A1CF				39240938-39240943-chr22-Intron-DEL-CACACT-CACACT--	0.000251042	PDGFB
1132	100705027-100705027-chr8-Missense_Mutation-SNP-T-T-A	0.000354318	PABPC1				50782526-50782529-chr16-Intron-DEL-GTGT-GTGT--	0.000246295	CYLD
1133	FOXO3 UTR	0.000353612	FOXO3				CUL3 Intron	0.000240488	CUL3
1134	HSP90AB1 Non_Silent	0.000352558	HSP90AB1				90889205-90889205-chr15-Intron-SNP-T-T-G	0.000236757	FES
1135	FANCA Intron	0.000352344	FANCA				STAT3 Intron	0.00023314	STAT3
1136	ROBO2 Non_Silent	0.000351658	ROBO2				152185420-152185420-chr7-Intron-SNP-T-T-G	0.000230574	KMT2C
1137	10981587-10981588-chr5-Intron-DEL-AC-AC--	0.000350827	CTNND2				LSM14A Intron	0.000227653	LSM14A
1138	17413487-17413487-chr1-Intron-SNP-C-C-A	0.000350806	RCC2				29944103-29944103-chr6-Intron-SNP-T-T-A	0.000226095	HLA-A
1139	SDHA Intron	0.000348982	SDHA				ERG Intron	0.000226059	ERG
1140	BCL2L1 Intron	0.000348651	BCL2L1				8896176-8896176-chr19-Intron-SNP-A-A-C	0.000213552	MUC16
1141	195811631-195811634-chr3-Intron-DEL-TCTC-TCTC--	0.000348356	MUC4				ASPSCR1 Intron	0.000209781	ASPSCR1
1142	DDX10 Intron	0.000348254	DDX10				TRIM33 Intron	0.00020725	TRIM33
1143	BCL9 Synonymous	0.000347876	BCL9				BCL11B Intron	0.000202912	BCL11B
1144	106432991-106432991-chr2-Missense_Mutation-SNP-C-C-T	0.000347634	RGPD3				RNF213 Intron	0.000201536	RNF213
1145	SRGAP3 Intron	0.000344961	SRGAP3				100719954-100719955-chr3-Intron-DEL-TT-TT--	0.00019943	TFG
1146	MAP3K1 Non_Silent	0.000343859	MAP3K1				CEP89 Intron	0.000187364	CEP89
1147	KDM5A UTR	0.000343368	KDM5A				102329408-102329408-chr8-Intron-SNP-T-T-A	0.000187038	UBR5
1148	JAK1 Intron	0.000343026	JAK1				152239010-152239011-chr7-Intron-DEL-TT-TT--	0.000178643	KMT2C
1149	MB21D2 Intron	0.000341175	MB21D2				NUP214 Intron	0.000176428	NUP214
1150	HMGN2 UTR	0.000340223	HMGN2				56720633-56720634-chr12-Intron-INS-----G	0.000176115	NACA
1151	NFIB Intron	0.000336489	NFIB				ATM Intron	0.000175589	ATM
1152	169116564-169116564-chr3-Synonymous-SNP-A-A-C	0.000335472	MECOM				IKBKB Intron	0.000168613	IKBKB
1153	CHD2 Non_Silent	0.00033385	CHD2				IL21R Intron	0.000165963	IL21R
1154	CDKN2A Non_Silent	0.000333292	CDKN2A				ERBB2 Intron	0.000160543	ERBB2
1155	CREBBP Intron	0.000333067	CREBBP				LIFR Intron	0.00015729	LIFR
1156	131990830-131990831-chr5-Intron-DEL-CC-CC--	0.000330789	ACSL6				FCGR2B Intron	0.000152779	FCGR2B
1157	RAF1 Intron	0.00033074	RAF1				GC Intron	0.000145404	GC
1158	MDM2 Intron	0.000330641	MDM2				TPR Intron	0.000145336	TPR
1159	MLLT4 Non_Silent	0.000330313	MLLT4				42217112-42217113-chr17-Intron-DEL-CA-CA--	0.000144736	STAT5B
1160	2926760-2926760-chr7-Missense_Mutation-SNP-A-A-C	0.00032876	CARD11				BMPR1A Intron	0.00013851	BMPR1A
1161	DROSHA Intron	0.000328524	DROSHA				MLLT3 Intron	0.000133714	MLLT3
1162	FAT1 Synonymous	0.000328282	FAT1				NFATC2 Intron	0.000131067	NFATC2
1163	MTOR Non_Silent	0.000327375	MTOR				SIRPA Intron	0.000120218	SIRPA
1164	FBXO11 Intron	0.000325386	FBXO11				HNF1A Intron	0.000119019	HNF1A
1165	47171162-47171164-chrX-In_Frame_Del-DEL-GGA-GGA--	0.000323479	RBM10				41347203-41347203-chrX-Intron-SNP-A-A-G	0.00011732	DDX3X
1166	AKT2 Non_Silent	0.000323479	AKT2				SS18 Intron	0.0001154	SS18
1167	GNAS Intron	0.0003217	GNAS				5130273-5130273-chr17-Intron-SNP-A-A-T	0.000115387	USP6
1168	ITGAV Intron	0.000321638	ITGAV				COX6C Intron	0.000114879	COX6C
1169	195785760-195785760-chr3-Synonymous-SNP-A-A-G	0.000320336	MUC4				VAV1 Intron	0.00011429	VAV1
1170	CNTNAP2 Non_Silent	0.000319965	CNTNAP2				MAP2K4 Intron	0.000112901	MAP2K4
1171	192917586-192917587-chr3-Intron-DEL-CA-CA--	0.000318385	MB21D2				TNK1 Intron	0.000110657	TNK1
1172	PABPC1 UTR	0.000317908	PABPC1				WT1 Intron	0.000110043	WT1
1173	ERC1 Intron	0.000315166	ERC1				S100A7 Intron	0.000107032	S100A7
1174	MYH11 Intron	0.00031506	MYH11				CBL Intron	0.000105774	CBL
1175	130055979-130055979-chrX-Missense_Mutation-SNP-T-T-G	0.000314188	BCORL1				FLI1 Intron	0.000103672	FLI1
1176	JAK2 Non_Silent	0.000312669	JAK2				29197729-29197730-chr2-Intron-INS-----CA	0.000103142	ALK
1177	100715538-100715538-chr8-Synonymous-SNP-T-T-C	0.000311924	PABPC1				58976313-58976314-chr5-Intron-DEL-AC-AC--	0.000101936	PDE4D
1178	CBLB Intron	0.000311733	CBLB				31361107-31361107-chr10-Intron-SNP-T-T-C	9.83947e-05	ZEB1
1179	HSP90AB1 Synonymous	0.000311596	HSP90AB1				NCOR1 Intron	7.72957e-05	NCOR1
1180	23254569-23254570-chr22-Intron-INS-----CC	0.000311543	BCR				GNA11 Intron	7.48607e-05	GNA11
1181	USP8 Synonymous	0.000311214	USP8				59666332-59666332-chr17-Intron-SNP-G-G-T	7.23594e-05	CLTC
1182	26779620-26779620-chr1-Missense_Mutation-SNP-A-A-C	0.000311062	ARID1A				71424112-71424113-chrX-Intron-DEL-TG-TG--	7.05341e-05	TAF1
1183	222201035-222201036-chr2-3'UTR-DEL-AC-AC--	0.000310739	PAX3				MAL Intron	7.00638e-05	MAL
1184	ITK Intron	0.000310734	ITK				10043667-10043667-chr3-Intron-SNP-C-C-T	5.7477e-05	FANCD2
1185	ATM Intron	0.000310385	ATM				152273921-152273921-chr7-Intron-SNP-C-C-T	5.24674e-05	KMT2C
1186	5135309-5135309-chr17-Intron-SNP-C-C-T	0.000309512	USP6				95711812-95711813-chr14-Intron-DEL-AG-AG--	5.1846e-05	TCL1A
1187	195784041-195784041-chr3-Synonymous-SNP-T-T-A	0.000309339	MUC4				CSF1 Intron	5.18038e-05	CSF1
1188	SPOP Intron	0.000309214	SPOP				RSPO3 Intron	4.53143e-05	RSPO3
1189	3770628-3770628-chr16-Missense_Mutation-SNP-G-G-T	0.000308734	CREBBP				AK1 Intron	4.09425e-05	AK1
1190	10825121-10825121-chr19-Missense_Mutation-SNP-T-T-G	0.000308515	DNM2				TNC Intron	4.01604e-05	TNC
1191	50492819-50492819-chr15-Missense_Mutation-SNP-A-A-G	0.000307734	USP8				121493431-121493432-chr3-Intron-DEL-TT-TT--	3.73858e-05	POLQ
1192	FOXO1 Intron	0.000306903	FOXO1				152235969-152235969-chr7-Intron-SNP-A-A-T	3.57643e-05	KMT2C
1193	100709201-100709201-chr8-Missense_Mutation-SNP-T-T-G	0.000306889	PABPC1				186105591-186105591-chr3-Intron-SNP-G-G-A	3.25502e-05	ETV5
1194	RAF1 Non_Silent	0.000306578	RAF1				ARAF Intron	2.90206e-05	ARAF
1195	147623925-147623925-chr1-Missense_Mutation-SNP-A-A-C	0.000306126	BCL9				10046838-10046838-chr3-Intron-SNP-G-G-A	2.8414e-05	FANCD2
1196	BIRC6 Intron	0.000305951	BIRC6				SF1 Intron	1.98341e-05	SF1
1197	11128098-11128098-chr1-Missense_Mutation-SNP-G-G-A	0.000305471	MTOR				102265098-102265098-chr8-Splice_Site-SNP-A-A-C	1.59954e-05	UBR5
1198	NF2 Intron	0.000305182	NF2				PRPF4 Intron	1.2339e-05	PRPF4
1199	RP1 Intron	0.000304491	RP1				IDH1 Intron	9.35855e-06	IDH1
1200	41339013-41339014-chrX-Intron-DEL-TA-TA--	0.000304423	DDX3X				5130329-5130329-chr17-Intron-SNP-C-C-T	5.95736e-06	USP6
1201	TCEA1 UTR	0.000303319	TCEA1				EML4 Intron	9.32971e-07	EML4
1202	131150610-131150610-chr9-Splice_Region-SNP-C-C-T	0.000303139	NUP214				LHFP Intron	4.41567e-07	LHFP
1203	XPO1 Non_Silent	0.000303055	XPO1
1204	USP8 Intron	0.000302949	USP8
1205	NFATC2 Intron	0.000302421	NFATC2
1206	323251-323251-chr12-Intron-SNP-T-T-A	0.000302399	KDM5A
1207	SETBP1 Intron	0.000301284	SETBP1
1208	8851321-8851321-chr19-Missense_Mutation-SNP-C-C-A	0.000301143	MUC16
1209	41739965-41739965-chr15-Intron-SNP-T-T-C	0.000300873	MGA
1210	152156320-152156320-chr7-Synonymous-SNP-T-T-G	0.000299951	KMT2C
1211	NUTM1 Non_Silent	0.00029821	NUTM1
1212	152247975-152247975-chr7-Missense_Mutation-SNP-G-G-A	0.000297715	KMT2C
1213	DAXX Non_Silent	0.000296782	DAXX
1214	SMO Non_Silent	0.000296713	SMO
1215	58874571-58874571-chr12-Missense_Mutation-SNP-T-T-G	0.000296283	LRIG3
1216	KAT7 Intron	0.000296267	KAT7
1217	PDE4DIP Non_Silent	0.000295199	PDE4DIP
1218	HLA-A Intron	0.000295088	HLA-A
1219	MUT Intron	0.00029491	MUT
1220	11027998-11027998-chr19-Intron-SNP-G-G-C	0.000294812	SMARCA4
1221	24180730-24180730-chr16-Intron-SNP-T-T-G	0.000294349	PRKCB
1222	FLI1 Non_Silent	0.000294233	FLI1
1223	ECT2 Non_Silent	0.00029368	ECT2
1224	31229310-31229310-chr17-Missense_Mutation-SNP-T-T-G	0.000292815	NF1
1225	ARNT Intron	0.000292738	ARNT
1226	195781545-195781545-chr3-Synonymous-SNP-C-C-A	0.000292599	MUC4
1227	PLCG1 Intron	0.000292463	PLCG1
1228	5130447-5130447-chr17-Splice_Region-SNP-T-T-G	0.000292345	USP6
1229	8885782-8885782-chr19-Missense_Mutation-SNP-G-G-C	0.000292304	MUC16
1230	FAM46C UTR	0.000291754	FAM46C
1231	36475338-36475338-chr1-Intron-SNP-T-T-G	0.000291534	CSF3R
1232	MDS2 Flank	0.000291148	MDS2
1233	RNF213 Non_Silent	0.00029114	RNF213
1234	91995613-91995613-chr7-Missense_Mutation-SNP-G-G-A	0.000290853	AKAP9
1235	GOLGA5 Intron	0.00029047	GOLGA5
1236	MYH9 Intron	0.000289126	MYH9
1237	TNC Intron	0.000288062	TNC
1238	TBL1XR1 Intron	0.000287997	TBL1XR1
1239	KTN1 Intron	0.000287833	KTN1
1240	FLT3 Intron	0.000287562	FLT3
1241	50400985-50400985-chr12-5'UTR-SNP-A-A-G	0.000287396	LARP4
1242	USP8 Non_Silent	0.000286217	USP8
1243	FLI1 Intron	0.000285972	FLI1
1244	10064924-10064924-chr3-Intron-SNP-T-T-C	0.000285883	FANCD2
1245	TOP1 Intron	0.000285394	TOP1
1246	175146835-175146838-chr1-Intron-DEL-TAAT-TAAT--	0.000284655	TNN
1247	99847525-99847525-chr9-Missense_Mutation-SNP-G-G-C	0.0002841	NR4A3
1248	PAX8 Intron	0.000283918	PAX8
1249	PRDM16 Non_Silent	0.000283706	PRDM16
1250	152273692-152273692-chr7-Intron-SNP-G-G-A	0.000283497	KMT2C
1251	LMNA Synonymous	0.000283101	LMNA
1252	PREX2 Non_Silent	0.000281143	PREX2
1253	29942911-29942911-chr6-Missense_Mutation-SNP-A-A-G	0.000280784	HLA-A
1254	100715488-100715488-chr8-Missense_Mutation-SNP-C-C-T	0.000280681	PABPC1
1255	17027879-17027881-chr1-Intron-DEL-GAA-GAA--	0.000280329	SDHB
1256	C2orf44 Non_Silent	0.000280036	C2orf44
1257	49033123-49033125-chr12-In_Frame_Del-DEL-TGC-TGC--	0.00027914	KMT2D
1258	125189745-125189747-chr9-5'UTR-DEL-GCG-GCG--	0.000279069	PPP6C
1259	131197620-131197621-chr9-Frame_Shift_Ins-INS-----C	0.000278948	NUP214
1260	50842075-50842076-chr10-Intron-DEL-AC-AC--	0.000278299	A1CF
1261	2945756-2945757-chr7-Intron-DEL-AC-AC--	0.000277965	CARD11
1262	89327120-89327120-chr15-Intron-SNP-A-A-C	0.000277578	POLG
1263	77956752-77956753-chr1-Intron-DEL-CA-CA--	0.000277004	FUBP1
1264	PHOX2B UTR	0.000276628	PHOX2B
1265	PPM1D Non_Silent	0.000276609	PPM1D
1266	PTPN1 Intron	0.000276572	PTPN1
1267	KL Intron	0.000276536	KL
1268	CLTC Intron	0.000276122	CLTC
1269	ECT2L Intron	0.000275081	ECT2L
1270	KDR Intron	0.00027434	KDR
1271	CDH10 Intron	0.000274169	CDH10
1272	52321433-52321433-chr15-Missense_Mutation-SNP-A-A-C	0.000274119	MYO5A
1273	8952839-8952839-chr19-Synonymous-SNP-T-T-G	0.000273601	MUC16
1274	122328150-122328150-chr12-Missense_Mutation-SNP-C-C-T	0.000272663	CLIP1
1275	7673803-7673803-chr17-Missense_Mutation-SNP-G-G-A	0.000271793	TP53
1276	240800553-240800554-chr1-Intron-DEL-AC-AC--	0.000271464	RGS7
1277	WT1 Intron	0.00026977	WT1
1278	195781547-195781547-chr3-Missense_Mutation-SNP-C-C-G	0.000269586	MUC4
1279	72957814-72957816-chr16-In_Frame_Del-DEL-CCA-CCA--	0.000268257	ZFHX3
1280	PAX3 Non_Silent	0.000267653	PAX3
1281	NUP214 Intron	0.000267252	NUP214
1282	GPHN Intron	0.000266416	GPHN
1283	NF2 Non_Silent	0.000266048	NF2
1284	AR Intron	0.000264878	AR
1285	SI Intron	0.000264511	SI
1286	47062372-47062374-chr3-Intron-DEL-TTT-TTT--	0.000263923	SETD2
1287	ROS1 Intron	0.000263318	ROS1
1288	CACNA1D Non_Silent	0.000260944	CACNA1D
1289	10063978-10063978-chr3-Intron-DEL-T-T--	0.000260686	FANCD2
1290	102329408-102329408-chr8-Intron-SNP-T-T-A	0.000260538	UBR5
1291	NTRK3 Intron	0.000259543	NTRK3
1292	TCF7L2 Intron	0.000259406	TCF7L2
1293	152273774-152273774-chr7-Missense_Mutation-SNP-C-C-T	0.000258961	KMT2C
1294	HLA-A Non_Silent	0.000258689	HLA-A
1295	147620546-147620546-chr1-Missense_Mutation-SNP-G-G-T	0.000258614	BCL9
1296	SUZ12 Non_Silent	0.000258335	SUZ12
1297	49933321-49933321-chr10-Missense_Mutation-SNP-C-C-T	0.000258194	PARG
1298	57470756-57470756-chr12-Synonymous-SNP-A-A-G	0.000258111	GLI1
1299	TSC2 Intron	0.000257156	TSC2
1300	IL21R UTR	0.000256901	IL21R
1301	100706704-100706704-chr8-Missense_Mutation-SNP-C-C-G	0.000255197	PABPC1
1302	MEN1 Intron	0.00025402	MEN1
1303	189880233-189880234-chr3-Intron-DEL-GT-GT--	0.00025358	TP63
1304	65537615-65537617-chr17-In_Frame_Del-DEL-TGG-TGG--	0.000253251	AXIN2
1305	WWP2 Flank	0.000252947	WWP2
1306	24768172-24768173-chr2-Intron-INS-----G	0.000252801	NCOA1
1307	6581005-6581008-chr12-Intron-DEL-AAAC-AAAC--	0.00025256	CHD4
1308	TRRAP Intron	0.000252527	TRRAP
1309	SYK Synonymous	0.000251439	SYK
1310	CRTC1 Intron	0.000250952	CRTC1
1311	COL2A1 Intron	0.00025008	COL2A1
1312	SMAD3 Intron	0.000249396	SMAD3
1313	CTNND1 Intron	0.000249239	CTNND1
1314	RPL10 Intron	0.000248881	RPL10
1315	ARHGAP5 Synonymous	0.000248872	ARHGAP5
1316	RAP1GDS1 Intron	0.000248819	RAP1GDS1
1317	15931506-15931506-chr1-Missense_Mutation-SNP-A-A-C	0.000248447	SPEN
1318	236538-236538-chr5-Synonymous-SNP-C-C-A	0.000248426	SDHA
1319	225395-225395-chr5-Intron-SNP-G-G-T	0.00024835	SDHA
1320	PDGFRB Non_Silent	0.000247457	PDGFRB
1321	25676526-25676528-chr4-In_Frame_Del-DEL-GCT-GCT--	0.000245698	SLC34A2
1322	RGPD3 Flank	0.000245572	RGPD3
1323	FLT4 Synonymous	0.000245513	FLT4
1324	147918575-147918575-chr2-Missense_Mutation-SNP-A-A-C	0.000245174	ACVR2A
1325	WWTR1 Non_Silent	0.000244282	WWTR1
1326	RMI2 Intron	0.000243237	RMI2
1327	IKBKB Non_Silent	0.000242097	IKBKB
1328	46726628-46726628-chr11-Splice_Site-SNP-T-T-G	0.000241598	F2
1329	CRLF2 Non_Silent	0.000241229	CRLF2
1330	MED12 Intron	0.000241159	MED12
1331	PRKCB Non_Silent	0.000240945	PRKCB
1332	CDK12 Synonymous	0.000240228	CDK12
1333	PBRM1 Non_Silent	0.000239858	PBRM1
1334	CREB3L1 Intron	0.000239655	CREB3L1
1335	PAX8 Flank	0.000239385	PAX8
1336	GC Intron	0.000239045	GC
1337	VAV1 Intron	0.000238735	VAV1
1338	LRP1 Intron	0.000237442	LRP1
1339	TSC1 Non_Silent	0.000237374	TSC1
1340	CASC5 Non_Silent	0.000236305	CASC5
1341	CTNNB1 Intron	0.0002357	CTNNB1
1342	MECOM Synonymous	0.000234766	MECOM
1343	95711812-95711813-chr14-Intron-DEL-AG-AG--	0.000233627	TCL1A
1344	KMT2D Synonymous	0.000232572	KMT2D
1345	59814600-59814603-chr10-Intron-DEL-ACAC-ACAC--	0.000232114	CCDC6
1346	42293915-42293915-chr19-Intron-SNP-T-T-G	0.000231531	CIC
1347	KMT2C UTR	0.000231442	KMT2C
1348	152229892-152229892-chr7-Intron-SNP-A-A-G	0.000231437	KMT2C
1349	CNTRL Non_Silent	0.000231357	CNTRL
1350	2945728-2945731-chr7-Intron-DEL-ACAC-ACAC--	0.000230799	CARD11
1351	8886841-8886841-chr19-Synonymous-SNP-C-C-T	0.000230396	MUC16
1352	42212247-42212247-chr17-Intron-SNP-C-C-A	0.000230354	STAT5B
1353	193142099-193142102-chr1-Intron-DEL-GAGA-GAGA--	0.000229131	CDC73
1354	149030031-149030031-chr1-Intron-SNP-T-T-G	0.000228535	PDE4DIP
1355	29944103-29944103-chr6-Intron-SNP-T-T-A	0.000228318	HLA-A
1356	PDE4DIP Synonymous	0.000228129	PDE4DIP
1357	FH Intron	0.000227487	FH
1358	RECQL Intron	0.000227351	RECQL
1359	NF1 Non_Silent	0.000226492	NF1
1360	132896601-132896603-chr9-In_Frame_Del-DEL-GCT-GCT--	0.000226282	TSC1
1361	44789972-44789972-chr19-Intron-SNP-C-C-G	0.000225804	CBLC
1362	CEP89 Non_Silent	0.000225303	CEP89
1363	87115030-87115030-chr4-Missense_Mutation-SNP-C-C-A	0.000224396	AFF1
1364	87134568-87134568-chr4-Missense_Mutation-SNP-G-G-C	0.000223918	AFF1
1365	TPM4 Non_Silent	0.000223895	TPM4
1366	PALB2 Intron	0.000223837	PALB2
1367	MDM4 Intron	0.000223446	MDM4
1368	BCL6 Intron	0.000222912	BCL6
1369	F5 Synonymous	0.000222183	F5
1370	CCNE1 Non_Silent	0.000220618	CCNE1
1371	LCP1 Flank	0.000219666	LCP1
1372	31181820-31181820-chr17-Intron-SNP-C-C-T	0.000218949	NF1
1373	92967580-92967581-chr15-Intron-DEL-AT-AT--	0.000218755	CHD2
1374	ARNT UTR	0.000218755	ARNT
1375	ARNT Synonymous	0.000218755	ARNT
1376	195783140-195783140-chr3-Missense_Mutation-SNP-C-C-T	0.000218755	MUC4
1377	48380147-48380148-chr13-Intron-DEL-TT-TT--	0.000218755	RB1
1378	75553553-75553553-chr7-Missense_Mutation-SNP-G-G-T	0.000218755	HIP1
1379	69879314-69879314-chr3-Synonymous-SNP-A-A-C	0.000218755	MITF
1380	90769421-90769421-chr15-Intron-DEL-T-T--	0.000218755	BLM
1381	33013382-33013382-chr1-Synonymous-SNP-G-G-A	0.000218755	AK2
1382	MLLT10 Synonymous	0.000218755	MLLT10
1383	50473910-50473910-chr12-Intron-DEL-A-A--	0.000218755	LARP4
1384	50794348-50794348-chr16-Missense_Mutation-SNP-C-C-A	0.000218755	CYLD
1385	FBL Intron	0.000218755	FBL
1386	15932115-15932115-chr1-Missense_Mutation-SNP-C-C-G	0.000218755	SPEN
1387	APOBEC3B Synonymous	0.000218755	APOBEC3B
1388	95116699-95116699-chr14-Splice_Region-DEL-A-A--	0.000218755	DICER1
1389	FOXO3 Intron	0.000218755	FOXO3
1390	BCL2 Non_Silent	0.000218755	BCL2
1391	190179617-190179617-chr4-3'Flank-SNP-T-T-A	0.000218755	DUX4
1392	26779439-26779440-chr1-Frame_Shift_Ins-INS-----G	0.000218755	ARID1A
1393	122328146-122328146-chr12-Missense_Mutation-SNP-G-G-T	0.000218755	CLIP1
1394	6667904-6667909-chr12-In_Frame_Del-DEL-TGCTGC-TGCTGC--	0.000218755	ZNF384
1395	29942944-29942944-chr6-Missense_Mutation-SNP-G-G-C	0.000218755	HLA-A
1396	IL6ST Intron	0.000218755	IL6ST
1397	CSF1R Synonymous	0.000218755	CSF1R
1398	C6 Non_Silent	0.000218755	C6
1399	MSH2 Intron	0.000218755	MSH2
1400	SMO Intron	0.000218755	SMO
1401	VTI1A Intron	0.000218755	VTI1A
1402	152187364-152187364-chr7-Missense_Mutation-SNP-T-T-G	0.000218755	KMT2C
1403	1212451-1212451-chrX-Intron-SNP-G-G-A	0.000218755	CRLF2
1404	PPM1D Intron	0.000218755	PPM1D
1405	KLK2 Intron	0.000218755	KLK2
1406	79909568-79909569-chr2-Intron-DEL-TG-TG--	0.000218755	CTNNA2
1407	AR Non_Silent	0.000218755	AR
1408	RALGDS Synonymous	0.000218755	RALGDS
1409	PREX2 Synonymous	0.000218755	PREX2
1410	CSF1 UTR	0.000218755	CSF1
1411	MUTYH Intron	0.000218755	MUTYH
1412	SP6 Non_Silent	0.000218755	SP6
1413	117159909-117159910-chr11-Intron-DEL-TT-TT--	0.000218755	PAFAH1B2
1414	56882022-56882024-chr5-In_Frame_Del-DEL-CAA-CAA--	0.000218755	MAP3K1
1415	15798635-15798635-chr16-Intron-SNP-C-C-A	0.000218755	MYH11
1416	188609331-188609331-chr3-Missense_Mutation-SNP-A-A-C	0.000218755	LPP
1417	74057710-74057710-chr7-Intron-SNP-A-A-C	0.000218755	ELN
1418	CSF3R Non_Silent	0.000218755	CSF3R
1419	122473667-122473667-chr12-Missense_Mutation-SNP-T-T-G	0.000218755	ZCCHC8
1420	RALGDS Intron	0.000218755	RALGDS
1421	136268287-136268287-chr6-Missense_Mutation-SNP-G-G-T	0.000218755	BCLAF1
1422	20141792-20141792-chrX-5'UTR-SNP-G-G-A	0.000218755	EIF1AX
1423	T Non_Silent	0.000218755	T
1424	29943611-29943611-chr6-Intron-SNP-G-G-A	0.000218755	HLA-A
1425	ZNF331 Synonymous	0.000218755	ZNF331
1426	8886823-8886823-chr19-Synonymous-SNP-G-G-A	0.000218755	MUC16
1427	HIP1 UTR	0.000218755	HIP1
1428	NOTCH1 Synonymous	0.000218755	NOTCH1
1429	HR Non_Silent	0.000218755	HR
1430	LMNA Non_Silent	0.000218755	LMNA
1431	6709622-6709622-chr19-Intron-SNP-T-T-C	0.000218755	C3
1432	HIP1 Non_Silent	0.000218755	HIP1
1433	HNRNPA2B1 Non_Silent	0.000218755	HNRNPA2B1
1434	138250994-138250994-chr8-Missense_Mutation-SNP-G-G-C	0.000218755	FAM135B
1435	56166699-56166699-chr8-Missense_Mutation-SNP-T-T-G	0.000218755	PLAG1
1436	TRIM24 Synonymous	0.000218755	TRIM24
1437	132871397-132871397-chr8-Nonsense_Mutation-SNP-C-C-A	0.000218755	TG
1438	DNMT3A Synonymous	0.000218755	DNMT3A
1439	47224248-47224249-chr1-Intron-DEL-AC-AC--	0.000218755	TAL1
1440	RNF43 Non_Silent	0.000218755	RNF43
1441	50492758-50492758-chr15-Missense_Mutation-SNP-C-C-A	0.000218755	USP8
1442	TCF3 Non_Silent	0.000218755	TCF3
1443	30650380-30650380-chr3-Frame_Shift_Del-DEL-A-A--	0.000218755	TGFBR2
1444	131164195-131164196-chr9-Intron-DEL-GT-GT--	0.000218755	NUP214
1445	BCOR Non_Silent	0.000218755	BCOR
1446	71298780-71298780-chrX-Synonymous-SNP-A-A-C	0.000218755	NONO
1447	ZRSR2 Intron	0.000218755	ZRSR2
1448	24706675-24706675-chr2-Missense_Mutation-SNP-G-G-C	0.000218755	NCOA1
1449	118751068-118751069-chr11-3'Flank-DEL-TA-TA--	0.000218755	DDX6
1450	WHSC1L1 Intron	0.000218755	WHSC1L1
1451	195785696-195785696-chr3-Missense_Mutation-SNP-G-G-A	0.000218755	MUC4
1452	ZNF429 Non_Silent	0.000218755	ZNF429
1453	NFKB2 Non_Silent	0.000218755	NFKB2
1454	138567611-138567611-chr7-Missense_Mutation-SNP-A-A-C	0.000218755	TRIM24
1455	118898318-118898318-chr11-3'UTR-SNP-A-A-C	0.000218755	BCL9L
1456	11750818-11750818-chr12-Intron-SNP-G-G-T	0.000218755	ETV6
1457	127973706-127973706-chr6-Missense_Mutation-SNP-T-T-C	0.000218755	PTPRK
1458	153336117-153336118-chr4-3'UTR-DEL-TA-TA--	0.000218755	TRIM2
1459	34893027-34893029-chr21-5'Flank-DEL-TTT-TTT--	0.000218755	RUNX1
1460	92937589-92937589-chr15-Frame_Shift_Del-DEL-A-A--	0.000218755	CHD2
1461	36300902-36300904-chr22-In_Frame_Del-DEL-CTC-CTC--	0.000218755	MYH9
1462	CCNC Intron	0.000218755	CCNC
1463	GK Non_Silent	0.000218755	GK
1464	41904090-41904090-chr19-Missense_Mutation-SNP-T-T-G	0.000218755	ARHGEF1
1465	97682448-97682448-chr9-Intron-SNP-G-G-A	0.000218755	XPA
1466	ETV5 UTR	0.000218755	ETV5
1467	108755015-108755015-chr2-Synonymous-SNP-A-A-G	0.000218755	RANBP2
1468	POLG Synonymous	0.000218755	POLG
1469	55152710-55152710-chr7-Intron-SNP-A-A-C	0.000218755	EGFR
1470	66853406-66853406-chr11-Intron-SNP-A-A-G	0.000218755	PC
1471	50476076-50476077-chr12-3'UTR-DEL-AT-AT--	0.000218755	LARP4
1472	TCF7L2 Non_Silent	0.000218755	TCF7L2
1473	CBFA2T3 Synonymous	0.000218755	CBFA2T3
1474	CNTRL Synonymous	0.000218755	CNTRL
1475	57200830-57200830-chr12-Intron-SNP-G-G-C	0.000218755	LRP1
1476	CNTRL Intron	0.000218755	CNTRL
1477	45076680-45076682-chrX-Intron-DEL-TTT-TTT--	0.000218755	KDM6A
1478	13100588-13100588-chr19-Intron-SNP-G-G-A	0.000218755	LYL1
1479	DDX6 Flank	0.000218755	DDX6
1480	MAP2K4 Intron	0.000218755	MAP2K4
1481	85473823-85473823-chr8-Intron-DEL-T-T--	0.000218755	CA2
1482	29942825-29942825-chr6-Missense_Mutation-SNP-G-G-A	0.000218755	HLA-A
1483	53382887-53382887-chr12-Missense_Mutation-SNP-C-C-A	0.000218755	SP1
1484	FAT4 Intron	0.000218483	FAT4
1485	8886745-8886745-chr19-Synonymous-SNP-A-A-C	0.000216727	MUC16
1486	MLLT3 Intron	0.00021645	MLLT3
1487	149198342-149198342-chr3-Intron-DEL-T-T--	0.00021645	CP
1488	133258226-133258227-chr8-Intron-DEL-CA-CA--	0.00021645	NDRG1
1489	GRM3 Intron	0.00021645	GRM3
1490	26779185-26779187-chr1-In_Frame_Del-DEL-GAA-GAA--	0.00021645	ARID1A
1491	69651220-69651222-chr11-In_Frame_Del-DEL-GAG-GAG--	0.00021645	CCND1
1492	CHD7 Synonymous	0.00021645	CHD7
1493	SETBP1 Synonymous	0.00021645	SETBP1
1494	149542407-149542409-chr3-In_Frame_Del-DEL-CTG-CTG--	0.00021645	WWTR1
1495	29944050-29944050-chr6-Intron-SNP-G-G-A	0.00021645	HLA-A
1496	RGPD3 Synonymous	0.00021645	RGPD3
1497	LZTR1 Non_Silent	0.00021645	LZTR1
1498	LCK Intron	0.00021645	LCK
1499	HIC2 Synonymous	0.00021645	HIC2
1500	307787-307787-chr12-Frame_Shift_Del-DEL-T-T--	0.00021645	KDM5A
1501	TRIM33 Non_Silent	0.00021645	TRIM33
1502	ATM Synonymous	0.00021645	ATM
1503	SMAD2 Intron	0.00021645	SMAD2
1504	EIF3E UTR	0.00021645	EIF3E
1505	NUP214 Synonymous	0.00021645	NUP214
1506	POU5F1 Intron	0.00021645	POU5F1
1507	74048167-74048167-chr7-Synonymous-SNP-T-T-G	0.00021645	ELN
1508	THRA UTR	0.00021645	THRA
1509	CCNB1IP1 Intron	0.00021645	CCNB1IP1
1510	124100556-124100557-chrX-Intron-DEL-CT-CT--	0.00021645	STAG2
1511	RSPO2 Intron	0.00021645	RSPO2
1512	169381418-169381418-chr3-Synonymous-SNP-A-A-G	0.00021645	MECOM
1513	RAC1 Intron	0.00021645	RAC1
1514	25246055-25246055-chr2-Missense_Mutation-SNP-A-A-C	0.00021645	DNMT3A
1515	13988243-13988244-chr7-Intron-DEL-CA-CA--	0.00021645	ETV1
1516	CHCHD7 Intron	0.00021645	CHCHD7
1517	70156043-70156043-chr8-Synonymous-SNP-A-A-G	0.00021645	NCOA2
1518	108078389-108078391-chr4-Splice_Region-DEL-GGT-GGT--	0.00021645	LEF1
1519	112538218-112538218-chr10-Intron-DEL-T-T--	0.00021645	VTI1A
1520	RALGDS Non_Silent	0.00021645	RALGDS
1521	10047813-10047813-chr3-Intron-SNP-C-C-T	0.00021645	FANCD2
1522	177135616-177135616-chr5-Missense_Mutation-SNP-A-A-C	0.00021645	NSD1
1523	BIRC6 Synonymous	0.00021645	BIRC6
1524	ALDH2 Non_Silent	0.00021645	ALDH2
1525	40086994-40086995-chr17-Intron-DEL-AC-AC--	0.00021645	THRA
1526	CSF3R Synonymous	0.00021645	CSF3R
1527	10043722-10043722-chr3-Intron-SNP-G-G-T	0.00021645	FANCD2
1528	NRAS Intron	0.00021645	NRAS
1529	8896166-8896166-chr19-Intron-SNP-A-A-G	0.00021645	MUC16
1530	PRDM16 Synonymous	0.00021645	PRDM16
1531	21486452-21486454-chr12-Intron-DEL-AAA-AAA--	0.00021645	RECQL
1532	PRRX1 Intron	0.00021645	PRRX1
1533	33013358-33013358-chr1-Missense_Mutation-SNP-C-C-G	0.00021645	AK2
1534	RDM1 Intron	0.00021645	RDM1
1535	33010831-33010832-chr1-3'Flank-INS-----GGATGT	0.00021645	AK2
1536	CCND1 Non_Silent	0.00021645	CCND1
1537	ARID1B Synonymous	0.00021645	ARID1B
1538	8896143-8896143-chr19-Intron-SNP-G-G-A	0.00021645	MUC16
1539	133132070-133132070-chr8-Intron-SNP-A-A-C	0.00021645	TG
1540	10047815-10047815-chr3-Intron-SNP-A-A-G	0.00021645	FANCD2
1541	31527082-31527084-chr10-In_Frame_Del-DEL-GAG-GAG--	0.00021645	ZEB1
1542	119620102-119620104-chrX-Intron-DEL-AAA-AAA--	0.00021645	SEPT6
1543	FIBP Intron	0.00021645	FIBP
1544	ARHGAP26 Non_Silent	0.00021645	ARHGAP26
1545	CXCR4 UTR	0.00021645	CXCR4
1546	CNOT3 Non_Silent	0.00021645	CNOT3
1547	PTPRK Non_Silent	0.00021645	PTPRK
1548	CS Intron	0.00021645	CS
1549	100703271-100703272-chr8-3'UTR-DEL-TG-TG--	0.00021645	PABPC1
1550	152185572-152185572-chr7-Synonymous-SNP-T-T-G	0.00021645	KMT2C
1551	100704954-100704954-chr8-Missense_Mutation-SNP-A-A-G	0.00021645	PABPC1
1552	CDH17 Non_Silent	0.00021645	CDH17
1553	152185479-152185480-chr7-Intron-INS-----T	0.00021645	KMT2C
1554	68645403-68645403-chr10-Missense_Mutation-SNP-G-G-T	0.00021645	TET1
1555	208248325-208248325-chr2-Intron-DEL-A-A--	0.00021645	IDH1
1556	BRAF Synonymous	0.00021645	BRAF
1557	64860149-64860150-chr1-Frame_Shift_Ins-INS-----G	0.00021645	JAK1
1558	57106769-57106769-chr12-Missense_Mutation-SNP-C-C-A	0.00021645	STAT6
1559	KDM5A Synonymous	0.00021645	KDM5A
1560	CDK6 UTR	0.00021645	CDK6
1561	10786723-10786725-chr19-Intron-DEL-CCA-CCA--	0.00021645	DNM2
1562	106423256-106423256-chr2-Missense_Mutation-SNP-C-C-T	0.00021645	RGPD3
1563	NCOA4 Non_Silent	0.00021645	NCOA4
1564	NCOR1 Synonymous	0.00021645	NCOR1
1565	EZR Synonymous	0.00021645	EZR
1566	GNAQ UTR	0.00021645	GNAQ
1567	132893568-132893569-chr8-Intron-DEL-GT-GT--	0.00021645	TG
1568	SDC4 UTR	0.00021645	SDC4
1569	8889457-8889457-chr19-Intron-SNP-T-T-G	0.00021645	MUC16
1570	120480521-120480522-chr11-Intron-DEL-GT-GT--	0.00021645	ARHGEF12
1571	236504-236504-chr5-Missense_Mutation-SNP-T-T-C	0.00021645	SDHA
1572	IKZF1 Intron	0.00021645	IKZF1
1573	41137713-41137713-chr22-Missense_Mutation-SNP-A-A-C	0.00021645	EP300
1574	BRCA2 Synonymous	0.00021645	BRCA2
1575	H3F3B Non_Silent	0.00021645	H3F3B
1576	SSX1 Intron	0.00021645	SSX1
1577	CIITA Non_Silent	0.00021645	CIITA
1578	152185690-152185690-chr7-Intron-SNP-A-A-T	0.00021645	KMT2C
1579	122328162-122328162-chr12-Missense_Mutation-SNP-C-C-T	0.00021645	CLIP1
1580	ZNF2 Non_Silent	0.00021645	ZNF2
1581	23263153-23263155-chr22-Intron-DEL-GGA-GGA--	0.00021645	BCR
1582	149185102-149185104-chr3-Intron-DEL-TTG-TTG--	0.00021645	CP
1583	HSP90AA1 Synonymous	0.00021645	HSP90AA1
1584	256433-256433-chr5-3'UTR-SNP-T-T-C	0.00021645	SDHA
1585	1804286-1804287-chr4-Intron-DEL-GG-GG--	0.00021645	FGFR3
1586	F2 Non_Silent	0.00021645	F2
1587	TFRC Non_Silent	0.00021645	TFRC
1588	STAT6 Intron	0.00021645	STAT6
1589	LCP1 Intron	0.00021645	LCP1
1590	58358072-58358072-chr17-Synonymous-SNP-C-C-T	0.00021645	RNF43
1591	60553287-60553289-chr2-5'UTR-DEL-GGC-GGC--	0.000216027	BCL11A
1592	SOX2 Synonymous	0.000214549	SOX2
1593	21006211-21006211-chr2-Missense_Mutation-SNP-C-C-T	0.000214549	APOB
1594	68632618-68632618-chr10-Intron-SNP-G-G-A	0.000214549	TET1
1595	33013319-33013319-chr1-Synonymous-SNP-G-G-A	0.000214549	AK2
1596	100712772-100712772-chr8-Synonymous-SNP-G-G-A	0.000214549	PABPC1
1597	FBLN2 Synonymous	0.000214549	FBLN2
1598	67168951-67168951-chr14-Missense_Mutation-SNP-T-T-G	0.000214549	GPHN
1599	116740945-116740945-chr7-Missense_Mutation-SNP-T-T-G	0.000214549	MET
1600	MLLT6 Intron	0.000214549	MLLT6
1601	FGFR3 Synonymous	0.000214549	FGFR3
1602	RSPO3 UTR	0.000214549	RSPO3
1603	57178458-57178459-chr12-Frame_Shift_Ins-INS-----G	0.000214549	LRP1
1604	HOXA11 Non_Silent	0.000214549	HOXA11
1605	PTPRC Non_Silent	0.000214549	PTPRC
1606	12590888-12590888-chr3-Missense_Mutation-SNP-C-C-G	0.000214549	RAF1
1607	DICER1 Non_Silent	0.000214549	DICER1
1608	DNAJB1 Intron	0.000214549	DNAJB1
1609	WHSC1 Non_Silent	0.000214549	WHSC1
1610	205662048-205662048-chr1-Missense_Mutation-SNP-A-A-C	0.000214549	SLC45A3
1611	208248388-208248388-chr2-Missense_Mutation-SNP-C-C-T	0.000214549	IDH1
1612	118898313-118898313-chr11-3'UTR-SNP-A-A-C	0.000214549	BCL9L
1613	CDC7 Flank	0.000214549	CDC7
1614	RNF4 Intron	0.000214549	RNF4
1615	ESR1 Non_Silent	0.000214549	ESR1
1616	DAXX Intron	0.000214549	DAXX
1617	TCF3 Intron	0.000214549	TCF3
1618	186708937-186708937-chr4-Synonymous-SNP-A-A-C	0.000214549	FAT1
1619	148989525-148989525-chr1-Intron-SNP-T-T-C	0.000214549	PDE4DIP
1620	49633381-49633381-chr12-Intron-SNP-A-A-G	0.000214549	PRPF40B
1621	PPP2R1A Non_Silent	0.000214549	PPP2R1A
1622	8896088-8896088-chr19-Missense_Mutation-SNP-T-T-A	0.000214549	MUC16
1623	209696357-209696359-chr2-Splice_Region-DEL-ATT-ATT--	0.000214549	MAP2
1624	FAM131B Intron	0.000214549	FAM131B
1625	45893388-45893391-chr12-Intron-DEL-TCTC-TCTC--	0.000214549	ARID2
1626	40630620-40630620-chr17-Intron-SNP-T-T-G	0.000214549	SMARCE1
1627	KIAA1598 Non_Silent	0.000214549	KIAA1598
1628	49032947-49032949-chr12-In_Frame_Del-DEL-GCT-GCT--	0.000214549	KMT2D
1629	152247823-152247823-chr7-Intron-SNP-C-C-A	0.000214549	KMT2C
1630	71140774-71140776-chrX-In_Frame_Del-DEL-CAG-CAG--	0.000214549	MED12
1631	CCNB1 Intron	0.000214549	CCNB1
1632	ITK Non_Silent	0.000214549	ITK
1633	LIFR Non_Silent	0.000214549	LIFR
1634	ESR1 Intron	0.000214549	ESR1
1635	29220745-29220745-chr2-Synonymous-SNP-T-T-C	0.000214549	ALK
1636	100712766-100712767-chr8-Frame_Shift_Ins-INS-----A	0.000214549	PABPC1
1637	100704967-100704967-chr8-Missense_Mutation-SNP-G-G-C	0.000214549	PABPC1
1638	PRKAR1A Intron	0.000214549	PRKAR1A
1639	29942858-29942858-chr6-Synonymous-SNP-C-C-A	0.000214549	HLA-A
1640	148931985-148931985-chr1-Intron-SNP-G-G-A	0.000214549	PDE4DIP
1641	100703138-100703138-chr8-3'UTR-DEL-T-T--	0.000214549	PABPC1
1642	PRF1 Non_Silent	0.000214549	PRF1
1643	ASPSCR1 Intron	0.000214549	ASPSCR1
1644	12609136-12609137-chr3-Intron-INS-----TA	0.000214549	RAF1
1645	27095695-27095697-chr7-In_Frame_Del-DEL-CGA-CGA--	0.000214549	HOXA1
1646	ABL1 Synonymous	0.000214549	ABL1
1647	NUP98 Synonymous	0.000214549	NUP98
1648	PRDM1 Non_Silent	0.000214549	PRDM1
1649	ABL2 Non_Silent	0.000214549	ABL2
1650	GATA2 Intron	0.000214549	GATA2
1651	GLI1 Synonymous	0.000214549	GLI1
1652	23312781-23312781-chr22-Intron-SNP-G-G-C	0.000214549	BCR
1653	127738359-127738361-chr8-In_Frame_Del-DEL-CAG-CAG--	0.000214549	MYC
1654	69174332-69174332-chr5-Missense_Mutation-SNP-G-G-A	0.000214549	CCNB1
1655	92077068-92077070-chr7-Intron-DEL-TTA-TTA--	0.000214549	AKAP9
1656	CDKN1A Non_Silent	0.000214549	CDKN1A
1657	10046555-10046555-chr3-Intron-SNP-G-G-A	0.000214549	FANCD2
1658	CLTCL1 Synonymous	0.000214549	CLTCL1
1659	127271490-127271491-chr2-Intron-DEL-AA-AA--	0.000214549	ERCC3
1660	EPHA3 Non_Silent	0.000214549	EPHA3
1661	93258228-93258228-chr6-Missense_Mutation-SNP-C-C-A	0.000214549	EPHA7
1662	32648391-32648394-chr8-Intron-DEL-AGAG-AGAG--	0.000214549	NRG1
1663	MYB Non_Silent	0.000214549	MYB
1664	106470842-106470842-chr2-5'Flank-SNP-C-C-T	0.000214549	RGPD3
1665	10073589-10073589-chr3-Intron-SNP-G-G-A	0.000214549	FANCD2
1666	LEF1 Intron	0.000214549	LEF1
1667	56720633-56720634-chr12-Intron-INS-----G	0.000214549	NACA
1668	58999554-58999555-chr5-Intron-DEL-TA-TA--	0.000214549	PDE4D
1669	93258225-93258227-chr6-In_Frame_Del-DEL-CTG-CTG--	0.000214549	EPHA7
1670	MYD88 Non_Silent	0.000214549	MYD88
1671	NCOA1 Synonymous	0.000214549	NCOA1
1672	FAT4 Synonymous	0.000214549	FAT4
1673	SKI Non_Silent	0.000214549	SKI
1674	71198206-71198208-chr3-In_Frame_Del-DEL-TGC-TGC--	0.000214549	FOXP1
1675	3731513-3731513-chr11-Synonymous-SNP-T-T-G	0.000214549	NUP98
1676	45650580-45650580-chr11-Missense_Mutation-SNP-A-A-C	0.000214549	CHST1
1677	SEPT9 UTR	0.000214549	SEPT9
1678	118495777-118495777-chr11-Missense_Mutation-SNP-A-A-C	0.000214549	KMT2A
1679	161362302-161362304-chr1-Intron-DEL-TTT-TTT--	0.000214549	SDHC
1680	TNF Flank	0.000214549	TNF
1681	STIL Synonymous	0.000214549	STIL
1682	NR4A3 Intron	0.000214549	NR4A3
1683	2170713-2170715-chr16-In_Frame_Del-DEL-GAG-GAG--	0.000214549	TRAF7
1684	13778600-13778602-chr1-In_Frame_Del-DEL-GAG-GAG--	0.000214549	PRDM2
1685	8977467-8977467-chr19-Synonymous-SNP-A-A-G	0.000214549	MUC16
1686	196053531-196053531-chr3-Missense_Mutation-SNP-A-A-C	0.000214549	TFRC
1687	RCE1 Non_Silent	0.000214549	RCE1
1688	PTPRB Non_Silent	0.000214549	PTPRB
1689	WWTR1 Intron	0.000214549	WWTR1
1690	TNC Synonymous	0.000214549	TNC
1691	31181818-31181818-chr17-Intron-SNP-G-G-T	0.000214549	NF1
1692	MET Non_Silent	0.000214549	MET
1693	NF1 Synonymous	0.000214549	NF1
1694	180620740-180620741-chr5-Intron-DEL-GT-GT--	0.000214549	FLT4
1695	CTNNB1 Non_Silent	0.000214371	CTNNB1
1696	WHSC1 Intron	0.000213661	WHSC1
1697	AXIN1 Intron	0.000213433	AXIN1
1698	92000141-92000142-chr14-Intron-DEL-AC-AC--	0.000212082	TRIP11
1699	ZNRF3 Intron	0.000209574	ZNRF3
1700	FLT4 Non_Silent	0.000208704	FLT4
1701	MYCL Non_Silent	0.000208445	MYCL
1702	MLLT6 Non_Silent	0.000207718	MLLT6
1703	TRAF7 Non_Silent	0.000207659	TRAF7
1704	8896136-8896137-chr19-Intron-INS-----T	0.000207659	MUC16
1705	SP9 Intron	0.000207659	SP9
1706	C3 Synonymous	0.000207659	C3
1707	MPL Non_Silent	0.000207659	MPL
1708	MEN1 Synonymous	0.000207659	MEN1
1709	13781628-13781628-chr1-Missense_Mutation-SNP-C-C-T	0.000207659	PRDM2
1710	MAP3K13 Synonymous	0.000207659	MAP3K13
1711	ZMYM3 Non_Silent	0.000207659	ZMYM3
1712	LARP4 Synonymous	0.000207659	LARP4
1713	PHF6 Intron	0.000207659	PHF6
1714	REL Non_Silent	0.000207659	REL
1715	SF3B1 Intron	0.000207659	SF3B1
1716	SETBP1 Non_Silent	0.000207659	SETBP1
1717	57175909-57175909-chr12-Missense_Mutation-SNP-A-A-C	0.000207659	LRP1
1718	BRCA1 Non_Silent	0.000207659	BRCA1
1719	SRGAP3 Synonymous	0.000207659	SRGAP3
1720	STIL Intron	0.000207659	STIL
1721	8935035-8935035-chr19-Missense_Mutation-SNP-C-C-T	0.000207659	MUC16
1722	29944118-29944118-chr6-Splice_Region-SNP-T-T-A	0.000207659	HLA-A
1723	5130298-5130298-chr17-Intron-SNP-T-T-C	0.000207659	USP6
1724	WT1 Flank	0.000207659	WT1
1725	29942845-29942845-chr6-Synonymous-SNP-C-C-T	0.000207659	HLA-A
1726	35040925-35040925-chr13-Splice_Region-SNP-A-A-T	0.000207659	NBEA
1727	46380384-46380384-chr2-Missense_Mutation-SNP-T-T-C	0.000207659	EPAS1
1728	175079968-175079969-chr1-Intron-DEL-GT-GT--	0.000207659	TNN
1729	106405246-106405246-chr2-Intron-DEL-A-A--	0.000207659	RGPD3
1730	7669662-7669662-chr17-Missense_Mutation-SNP-T-T-G	0.000207659	TP53
1731	29694817-29694817-chr22-3'UTR-SNP-A-A-C	0.000207659	NF2
1732	162780096-162780096-chr1-Intron-SNP-A-A-T	0.000207659	DDR2
1733	132966467-132966468-chr8-Intron-DEL-TG-TG--	0.000207659	TG
1734	55110775-55110775-chr4-Splice_Region-SNP-G-G-A	0.000207659	KDR
1735	14158612-14158612-chr3-Missense_Mutation-SNP-A-A-C	0.000207659	XPC
1736	EXT2 Non_Silent	0.000207659	EXT2
1737	10046558-10046558-chr3-Intron-SNP-G-G-A	0.000207659	FANCD2
1738	STAT3 Intron	0.000207659	STAT3
1739	28689180-28689180-chr22-Synonymous-SNP-C-C-G	0.000207659	CHEK2
1740	ERCC2 Intron	0.000207659	ERCC2
1741	11230913-11230913-chr1-Intron-SNP-C-C-A	0.000207659	MTOR
1742	5130477-5130477-chr17-Intron-SNP-C-C-T	0.000207659	USP6
1743	100715564-100715564-chr8-Missense_Mutation-SNP-C-C-T	0.000207659	PABPC1
1744	12608837-12608837-chr3-Nonsense_Mutation-SNP-G-G-T	0.000207659	RAF1
1745	LCP1 Non_Silent	0.000207659	LCP1
1746	152145265-152145265-chr7-Missense_Mutation-SNP-T-T-G	0.000207659	KMT2C
1747	8910513-8910513-chr19-Splice_Region-SNP-A-A-G	0.000207659	MUC16
1748	3119102-3119102-chr19-Intron-SNP-A-A-C	0.000207659	GNA11
1749	33013400-33013401-chr1-Frame_Shift_Ins-INS-----ATGTC	0.000207659	AK2
1750	116769622-116769624-chr7-Intron-DEL-TTT-TTT--	0.000207659	MET
1751	39725805-39725805-chr17-Missense_Mutation-SNP-C-C-G	0.000207659	ERBB2
1752	FBLN2 Intron	0.000207659	FBLN2
1753	HERPUD1 Non_Silent	0.000207659	HERPUD1
1754	195781070-195781070-chr3-Missense_Mutation-SNP-T-T-G	0.000207659	MUC4
1755	54290486-54290486-chr4-Nonsense_Mutation-SNP-C-C-A	0.000207659	PDGFRA
1756	49033483-49033485-chr12-In_Frame_Del-DEL-TGC-TGC--	0.000207659	KMT2D
1757	138683737-138683737-chr3-Missense_Mutation-SNP-A-A-C	0.000207659	PIK3CB
1758	140653008-140653009-chr5-Frame_Shift_Del-DEL-GA-GA--	0.000207659	IK
1759	IRF4 Non_Silent	0.000207659	IRF4
1760	46378063-46378065-chr2-In_Frame_Del-DEL-CAG-CAG--	0.000207659	EPAS1
1761	HIP1 Synonymous	0.000207659	HIP1
1762	130005230-130005230-chrX-5'UTR-SNP-T-T-G	0.000207659	BCORL1
1763	21974721-21974721-chr9-Missense_Mutation-SNP-G-G-C	0.000207659	CDKN2A
1764	ALB Non_Silent	0.000207659	ALB
1765	SPEN Intron	0.000207659	SPEN
1766	IL7R Intron	0.000207659	IL7R
1767	ACSL3 Non_Silent	0.000207659	ACSL3
1768	PSD Intron	0.000207659	PSD
1769	ABI1 Intron	0.000207659	ABI1
1770	10046838-10046838-chr3-Intron-SNP-G-G-A	0.000207659	FANCD2
1771	FLNA Synonymous	0.000207659	FLNA
1772	CREBBP UTR	0.000207659	CREBBP
1773	68529886-68529887-chr17-Intron-INS-----TGTT	0.000207659	PRKAR1A
1774	MGA Intron	0.000207659	MGA
1775	JAK3 Non_Silent	0.000207659	JAK3
1776	RLF Non_Silent	0.000207659	RLF
1777	RGS7 UTR	0.000207659	RGS7
1778	P2RY8 Intron	0.000207659	P2RY8
1779	BRIP1 Non_Silent	0.000207659	BRIP1
1780	31361084-31361084-chr10-Intron-SNP-T-T-C	0.000207659	ZEB1
1781	CD2 Non_Silent	0.000207659	CD2
1782	BIRC3 Non_Silent	0.000207659	BIRC3
1783	PRPF40B Non_Silent	0.000207659	PRPF40B
1784	POLQ Non_Silent	0.000207659	POLQ
1785	112265565-112265565-chr8-Synonymous-SNP-T-T-G	0.000207659	CSMD3
1786	DNM2 Non_Silent	0.000207659	DNM2
1787	31361053-31361053-chr10-Intron-SNP-C-C-A	0.000207659	ZEB1
1788	186057145-186057145-chr3-Missense_Mutation-SNP-T-T-G	0.000207659	ETV5
1789	FES Intron	0.000207659	FES
1790	NPM1 UTR	0.000207659	NPM1
1791	TPM4 Intron	0.000207659	TPM4
1792	POU2AF1 Intron	0.000207659	POU2AF1
1793	SS18L1 Intron	0.000207659	SS18L1
1794	134050431-134050431-chr9-Synonymous-SNP-T-T-G	0.000207659	BRD3
1795	46739345-46739345-chr11-Synonymous-SNP-C-C-T	0.000207659	F2
1796	100709611-100709611-chr8-Missense_Mutation-SNP-C-C-A	0.000207659	PABPC1
1797	TBX3 Intron	0.000207659	TBX3
1798	XPC Intron	0.000207659	XPC
1799	187726755-187726755-chr3-Missense_Mutation-SNP-C-C-G	0.000207659	BCL6
1800	SPOP Non_Silent	0.000207659	SPOP
1801	150813211-150813211-chr1-Missense_Mutation-SNP-T-T-G	0.000207659	ARNT
1802	44952884-44952884-chr18-Missense_Mutation-SNP-T-T-C	0.000207659	SETBP1
1803	50492753-50492753-chr15-Missense_Mutation-SNP-C-C-T	0.000207659	USP8
1804	ARHGAP5 UTR	0.000207659	ARHGAP5
1805	53382399-53382399-chr12-Missense_Mutation-SNP-C-C-G	0.000207659	SP1
1806	MAP2K2 Non_Silent	0.000207659	MAP2K2
1807	57751710-57751710-chr12-Missense_Mutation-SNP-G-G-T	0.000207659	CDK4
1808	ANK1 Synonymous	0.000207659	ANK1
1809	73981273-73981273-chr4-Synonymous-SNP-T-T-C	0.000207659	PF4
1810	29944026-29944026-chr6-Intron-SNP-G-G-A	0.000207659	HLA-A
1811	3069057-3069059-chr1-5'Flank-DEL-GGC-GGC--	0.000207659	PRDM16
1812	92005779-92005779-chr14-Missense_Mutation-SNP-A-A-C	0.000207659	TRIP11
1813	EGF Synonymous	0.000207659	EGF
1814	15763747-15763748-chr16-Intron-INS-----C	0.000207659	MYH11
1815	37907548-37907548-chr7-Missense_Mutation-SNP-T-T-G	0.000207659	SFRP4
1816	MSN Intron	0.000207659	MSN
1817	AMT Non_Silent	0.000207659	AMT
1818	15238895-15238897-chr19-In_Frame_Del-DEL-GCT-GCT--	0.000207659	BRD4
1819	APOB Synonymous	0.000207659	APOB
1820	NKX2-1 UTR	0.000207659	NKX2-1
1821	28987137-28987137-chr22-Missense_Mutation-SNP-T-T-G	0.000207659	ZNRF3
1822	13988621-13988621-chr7-Intron-DEL-A-A--	0.000207659	ETV1
1823	128772824-128772824-chr11-Missense_Mutation-SNP-A-A-G	0.000207659	FLI1
1824	102572945-102572945-chr10-Intron-SNP-T-T-C	0.000207659	SUFU
1825	ELK4 Intron	0.000207659	ELK4
1826	152265091-152265091-chr7-Synonymous-SNP-T-T-A	0.000207659	KMT2C
1827	29944151-29944151-chr6-Missense_Mutation-SNP-C-C-G	0.000207659	HLA-A
1828	BARD1 Intron	0.000207659	BARD1
1829	55201370-55201371-chr7-Intron-DEL-TC-TC--	0.000206334	EGFR
1830	CBL Non_Silent	0.000205598	CBL
1831	HLF UTR	0.000205598	HLF
1832	SFRP4 Non_Silent	0.000205598	SFRP4
1833	152235969-152235969-chr7-Intron-SNP-A-A-T	0.000205598	KMT2C
1834	108663889-108663889-chr6-Synonymous-SNP-C-C-G	0.000205598	FOXO3
1835	SLC45A3 Non_Silent	0.000205598	SLC45A3
1836	179218303-179218303-chr3-Missense_Mutation-SNP-G-G-A	0.000205598	PIK3CA
1837	8910510-8910510-chr19-Splice_Site-SNP-T-T-G	0.000205598	MUC16
1838	FNBP1 Intron	0.000205598	FNBP1
1839	100715573-100715573-chr8-Missense_Mutation-SNP-C-C-T	0.000205598	PABPC1
1840	134050425-134050425-chr9-Synonymous-SNP-A-A-G	0.000205598	BRD3
1841	6688168-6688169-chr12-Splice_Region-DEL-CT-CT--	0.000205598	ZNF384
1842	132966464-132966465-chr8-Intron-INS-----TG	0.000205598	TG
1843	RLF Intron	0.000205598	RLF
1844	11157118-11157118-chr1-Intron-SNP-G-G-C	0.000205598	MTOR
1845	CUL3 Intron	0.000205598	CUL3
1846	LMO2 Intron	0.000205598	LMO2
1847	124327645-124327648-chr12-Intron-DEL-AGAC-AGAC--	0.000205598	NCOR2
1848	HOXD11 Non_Silent	0.000205598	HOXD11
1849	8985094-8985095-chr3-3'UTR-DEL-AT-AT--	0.000205598	SRGAP3
1850	236561-236561-chr5-Missense_Mutation-SNP-G-G-A	0.000205598	SDHA
1851	CAMTA1 Synonymous	0.000205598	CAMTA1
1852	PLAG1 UTR	0.000205598	PLAG1
1853	MAP3K1 Synonymous	0.000205598	MAP3K1
1854	FBXW7 Intron	0.000205598	FBXW7
1855	112314588-112314588-chr8-Missense_Mutation-SNP-C-C-T	0.000205598	CSMD3
1856	H3F3A Intron	0.000205598	H3F3A
1857	8976101-8976101-chr19-Missense_Mutation-SNP-T-T-C	0.000205598	MUC16
1858	75556687-75556688-chr7-Intron-DEL-AA-AA--	0.000205598	HIP1
1859	9763013-9763015-chr16-3'Flank-DEL-CAA-CAA--	0.000205598	GRIN2A
1860	8896176-8896176-chr19-Intron-SNP-A-A-C	0.000205598	MUC16
1861	SRC Non_Silent	0.000205598	SRC
1862	10073532-10073532-chr3-Intron-SNP-C-C-T	0.000205598	FANCD2
1863	BCL9L Synonymous	0.000205598	BCL9L
1864	PDCD1LG2 Non_Silent	0.000205598	PDCD1LG2
1865	10049115-10049115-chr3-Intron-SNP-A-A-C	0.000205598	FANCD2
1866	33010795-33010795-chr1-3'Flank-SNP-G-G-A	0.000205598	AK2
1867	152177063-152177063-chr7-Frame_Shift_Del-DEL-T-T--	0.000205598	KMT2C
1868	TBL1X Non_Silent	0.000205598	TBL1X
1869	152235734-152235734-chr7-Intron-SNP-T-T-A	0.000205598	KMT2C
1870	161362302-161362305-chr1-Intron-DEL-TTTT-TTTT--	0.000205598	SDHC
1871	CSF1R Non_Silent	0.000205598	CSF1R
1872	138567640-138567640-chr7-Missense_Mutation-SNP-C-C-A	0.000205598	TRIM24
1873	BRAF Intron	0.000205598	BRAF
1874	TAF1 Non_Silent	0.000205598	TAF1
1875	FEN1 Non_Silent	0.000205598	FEN1
1876	100702943-100702943-chr8-3'UTR-SNP-A-A-T	0.000205598	PABPC1
1877	100702961-100702961-chr8-3'UTR-SNP-A-A-G	0.000205598	PABPC1
1878	186667130-186667130-chr2-Intron-DEL-T-T--	0.000205598	ITGAV
1879	SP8 Non_Silent	0.000205598	SP8
1880	256463-256463-chr5-3'UTR-SNP-T-T-C	0.000205598	SDHA
1881	BMPR1A Intron	0.000205598	BMPR1A
1882	TK1 Non_Silent	0.000205598	TK1
1883	8896102-8896103-chr19-Intron-INS-----GT	0.000205598	MUC16
1884	KLF6 Intron	0.000205598	KLF6
1885	72016239-72016239-chr11-Missense_Mutation-SNP-C-C-G	0.000205598	NUMA1
1886	DDB2 Intron	0.000205598	DDB2
1887	29944144-29944144-chr6-Synonymous-SNP-C-C-T	0.000205598	HLA-A
1888	45893388-45893389-chr12-Intron-DEL-TC-TC--	0.000205598	ARID2
1889	75553556-75553556-chr7-Missense_Mutation-SNP-T-T-C	0.000205598	HIP1
1890	PTPN13 Synonymous	0.000205598	PTPN13
1891	195780215-195780215-chr3-Missense_Mutation-SNP-C-C-G	0.000205598	MUC4
1892	128911735-128911735-chr11-Synonymous-SNP-C-C-T	0.000205598	KCNJ5
1893	PAX5 Non_Silent	0.000205598	PAX5
1894	29945531-29945532-chr6-3'UTR-INS-----C	0.000205598	HLA-A
1895	CDK6 Intron	0.000205598	CDK6
1896	FGFR3 UTR	0.000205598	FGFR3
1897	47791155-47791156-chr2-Intron-DEL-TG-TG--	0.000205598	MSH6
1898	72013739-72013739-chr11-Missense_Mutation-SNP-A-A-C	0.000205598	NUMA1
1899	5135310-5135310-chr17-Intron-SNP-A-A-G	0.000205598	USP6
1900	GOPC Intron	0.000205598	GOPC
1901	AKT1 Synonymous	0.000205598	AKT1
1902	240343-240343-chr5-Intron-DEL-T-T--	0.000205598	SDHA
1903	PAX3 UTR	0.000205598	PAX3
1904	10047825-10047825-chr3-Intron-SNP-A-A-G	0.000205598	FANCD2
1905	77684989-77684992-chr11-Intron-DEL-AAAT-AAAT--	0.000205598	RSF1
1906	102285041-102285044-chr8-Intron-DEL-AAAC-AAAC--	0.000205598	UBR5
1907	29320789-29320789-chr2-Missense_Mutation-SNP-A-A-C	0.000205598	ALK
1908	117805016-117805018-chr8-Intron-DEL-ATG-ATG--	0.000205598	EXT1
1909	133754547-133754547-chr3-Synonymous-SNP-C-C-T	0.000205598	TF
1910	122328152-122328152-chr12-Missense_Mutation-SNP-A-A-C	0.000205598	CLIP1
1911	25768772-25768772-chr2-Missense_Mutation-SNP-C-C-G	0.000205598	ASXL2
1912	LARP4B Intron	0.000205598	LARP4B
1913	IDH1 Intron	0.000205598	IDH1
1914	72788110-72788112-chr16-In_Frame_Del-DEL-TGC-TGC--	0.000205598	ZFHX3
1915	77596796-77596798-chr3-Intron-DEL-TTT-TTT--	0.000205598	ROBO2
1916	52343144-52343144-chr15-Missense_Mutation-SNP-A-A-C	0.000205598	MYO5A
1917	70635586-70635589-chr12-Intron-DEL-AAAC-AAAC--	0.000205598	PTPRB
1918	AK1 Intron	0.000205598	AK1
1919	NFE2 Non_Silent	0.000205598	NFE2
1920	6955269-6955269-chr12-Splice_Site-SNP-T-T-G	0.000205598	PTPN6
1921	77599585-77599588-chrX-Splice_Region-DEL-AAAC-AAAC--	0.000205598	ATRX
1922	RPL5 Intron	0.000205598	RPL5
1923	STAT5B Intron	0.000205598	STAT5B
1924	ASXL1 Non_Silent	0.000205598	ASXL1
1925	256259-256259-chr5-Intron-SNP-T-T-A	0.000205598	SDHA
1926	MKL1 Intron	0.000205598	MKL1
1927	ROBO2 Synonymous	0.000205598	ROBO2
1928	CREB3L1 UTR	0.000205598	CREB3L1
1929	77477462-77477462-chr3-Missense_Mutation-SNP-C-C-G	0.000205598	ROBO2
1930	71140739-71140741-chrX-In_Frame_Del-DEL-AGC-AGC--	0.000205598	MED12
1931	SF1 Intron	0.000205598	SF1
1932	10049351-10049351-chr3-Intron-SNP-T-T-C	0.000205598	FANCD2
1933	29942916-29942916-chr6-Missense_Mutation-SNP-A-A-G	0.000205598	HLA-A
1934	HNRNPA2B1 Intron	0.000205598	HNRNPA2B1
1935	167875361-167875361-chr6-Missense_Mutation-SNP-T-T-G	0.000205598	MLLT4
1936	130885333-130885333-chr9-Missense_Mutation-SNP-A-A-C	0.000205598	ABL1
1937	SF3B1 Synonymous	0.000205598	SF3B1
1938	CIC Synonymous	0.000205598	CIC
1939	57126023-57126023-chr7-Missense_Mutation-SNP-T-T-C	0.000205598	ZNF479
1940	HOXD1 Non_Silent	0.000205598	HOXD1
1941	21446184-21446184-chr22-Missense_Mutation-SNP-A-A-G	0.000205598	HIC2
1942	DAXX UTR	0.000205598	DAXX
1943	COL2A1 Non_Silent	0.000205598	COL2A1
1944	PPP2R1A Intron	0.000205598	PPP2R1A
1945	RET Synonymous	0.000205598	RET
1946	TFPT Intron	0.000205598	TFPT
1947	TOP1 Non_Silent	0.000205598	TOP1
1948	BCL11A Synonymous	0.000205598	BCL11A
1949	45334525-45334525-chr1-Intron-SNP-A-A-C	0.000205598	MUTYH
1950	PTPRT Synonymous	0.000205598	PTPRT
1951	10046830-10046830-chr3-Intron-SNP-T-T-C	0.000203158	FANCD2
1952	FGFR1 Non_Silent	0.000202086	FGFR1
1953	85473668-85473669-chr8-Intron-DEL-AT-AT--	0.000201935	CA2
1954	ATR Non_Silent	0.000201688	ATR
1955	SDHA Non_Silent	0.000199565	SDHA
1956	60856479-60856481-chr8-In_Frame_Del-DEL-GGA-GGA--	0.0001988	CHD7
1957	CDK12 Intron	0.0001988	CDK12
1958	CHD2 Intron	0.000197038	CHD2
1959	195780236-195780236-chr3-Missense_Mutation-SNP-C-C-G	0.000196988	MUC4
1960	195782770-195782770-chr3-Missense_Mutation-SNP-A-A-G	0.000196555	MUC4
1961	RUNX1 Flank	0.000194711	RUNX1
1962	ELL Intron	0.000193701	ELL
1963	115040907-115040908-chr9-Intron-DEL-AC-AC--	0.000192963	TNC
1964	TMPRSS2 Intron	0.000191765	TMPRSS2
1965	PIK3CB Intron	0.000191591	PIK3CB
1966	29944168-29944168-chr6-Synonymous-SNP-G-G-A	0.000191196	HLA-A
1967	28887409-28887410-chr22-Intron-DEL-AG-AG--	0.000190903	ZNRF3
1968	118900576-118900579-chr11-Intron-DEL-GCCT-GCCT--	0.000189135	BCL9L
1969	106457033-106457033-chr2-Missense_Mutation-SNP-C-C-T	0.000185666	RGPD3
1970	NUTM2A Synonymous	0.000185333	NUTM2A
1971	NCOA1 Intron	0.000184114	NCOA1
1972	195785697-195785697-chr3-Synonymous-SNP-T-T-C	0.00018371	MUC4
1973	10064724-10064724-chr3-Splice_Region-SNP-C-C-T	0.000183084	FANCD2
1974	TRIM2 Intron	0.000182098	TRIM2
1975	42333743-42333743-chr17-Missense_Mutation-SNP-G-G-C	0.000179556	STAT3
1976	29942825-29942825-chr6-Missense_Mutation-SNP-G-G-T	0.000178476	HLA-A
1977	ERBB3 Synonymous	0.000178434	ERBB3
1978	11019031-11019031-chr19-Splice_Region-SNP-A-A-C	0.000176592	SMARCA4
1979	AK2 Non_Silent	0.00017337	AK2
1980	CYLD Intron	0.000173053	CYLD
1981	27650165-27650166-chr12-Intron-DEL-CT-CT--	0.000173037	PPFIBP1
1982	26773691-26773693-chr1-In_Frame_Del-DEL-GCA-GCA--	0.000169802	ARID1A
1983	KMT2C Synonymous	0.000168285	KMT2C
1984	152265083-152265083-chr7-Missense_Mutation-SNP-C-C-A	0.000168041	KMT2C
1985	47803500-47803501-chr2-Frame_Shift_Ins-INS-----C	0.000167968	MSH6
1986	47269656-47269656-chr1-Missense_Mutation-SNP-T-T-G	0.000166193	STIL
1987	MAP3K13 Intron	0.000164781	MAP3K13
1988	31361099-31361099-chr10-Intron-SNP-C-C-A	0.000164721	ZEB1
1989	148979731-148979731-chr1-Splice_Region-SNP-A-A-T	0.000164269	PDE4DIP
1990	STK11 Flank	0.000162335	STK11
1991	PRCC Intron	0.000161895	PRCC
1992	152273712-152273712-chr7-Synonymous-SNP-A-A-T	0.000160612	KMT2C
1993	100709477-100709477-chr8-Missense_Mutation-SNP-G-G-T	0.000158592	PABPC1
1994	FSTL3 Intron	0.000157423	FSTL3
1995	6710574-6710577-chr19-Intron-DEL-GAGA-GAGA--	0.00015486	C3
1996	33013287-33013287-chr1-Missense_Mutation-SNP-C-C-T	0.000152303	AK2
[truncated: 89 more rows]
